# Supplementary material for: World Scientists’ Warning of a Climate Emergency 2021
Source: Oxford University Press journal article supplement (doi:10.1093/biosci/biab079), 2021-07-06
Supplement: biab079_supplemental_files.zip [file biab079_supplemental_files.zip]

Archive with 2 entries (2 files):
- Supplemental_file_S2.pdf
- Supplemental_file_S1.pdf
