# Supplementary material for: World Scientists’ Warning of a Climate Emergency 2021
Source: Oxford University Press journal article supplement (doi:10.1093/biosci/biab079), 2021-07-06
Supplement: biab079_supplemental_files.zip [file biab079_supplemental_files.zip › Supplemental_file_S1.pdf]

**Supplemental File S1** for the article “**World Scientists’ Warning of a Climate Emergency 2021**” published in *BioScience* by William J. Ripple, Christopher Wolf, Thomas M. Newsome, Jillian W. Gregg, Timothy M. Lenton, Ignacio Palomo, Jasper A.J. Eikelboom, Beverly E. Law, Saleemul Huq, Philip B. Duffy, and Johan Rockström.

**Contents:** List of countries with scientist signatories of Ripple et al. (2020) (page 1); List of scientist signatories of Ripple et al. (2020) (pages 1-401). Note that signatories are from the previously published paper:

Ripple WJ, Wolf C, Newsome TM, Barnard P, Moomaw WR. 2020. World scientists’ warning of a climate emergency. *BioScience* 70: 8–12.

**List of 158 countries with scientist signatories of Ripple et al. (2020):** Albania; Algeria; American Samoa; Andorra; Antigua and Barbuda; Argentina; Australia; Austria; Bahamas (the); Bangladesh; Barbados; Belarus; Belgium; Belize; Benin; Bolivia (Plurinational State of); Botswana; Brazil; Brunei Darussalam; Bulgaria; Burkina Faso; Cambodia; Cameroon; Canada; Cayman Islands (the); Chad; Chile; China; Colombia; Congo (the Democratic Republic of the); Congo (the); Costa Rica; Côte d’Ivoire; Croatia; Cuba; Curaçao; Cyprus; Czech Republic (the); Denmark; Dominican Republic (the); Ecuador; Egypt; El Salvador; Estonia; Ethiopia; Faroe Islands (the); Fiji; Finland; France; French Guiana; French Polynesia; Georgia; Germany; Ghana; Greece; Guam; Guatemala; Guyana; Honduras; Hong Kong; Hungary; Iceland; India; Indonesia; Iran (Islamic Republic of); Iraq; Ireland; Israel; Italy; Jamaica; Japan; Jersey; Kazakhstan; Kenya; Kiribati; Korea (the Republic of); Lao People’s Democratic Republic (the); Latvia; Lebanon; Lesotho; Liberia; Liechtenstein; Lithuania; Luxembourg; Macao; Macedonia, Republic of (the former Yugoslavia); Madagascar; Malawi; Malaysia; Mali; Malta; Martinique; Mauritius; Mexico; Micronesia (Federated States of); Moldova (the Republic of); Monaco; Morocco; Mozambique; Namibia; Nepal; Netherlands (the); New Caledonia; New Zealand; Nigeria; Northern Mariana Islands (the); Norway; Pakistan; Panama; Papua New Guinea; Paraguay; Peru; Philippines (the); Poland; Portugal; Puerto Rico; Qatar; Réunion; Romania; Russian Federation (the); Rwanda; São Tomé and Príncipe; Saudi Arabia; Senegal; Serbia; Seychelles; Sierra Leone; Singapore; Slovakia; Slovenia; South Africa; Spain; Sri Lanka; Sudan (the); Suriname; Sweden; Switzerland; Taiwan; Tanzania, United Republic of; Thailand; Togo; Tokelau; Tunisia; Turkey; Turks and Caicos Islands (the); Uganda; Ukraine; United Arab Emirates (the); United Kingdom of Great Britain and Northern Ireland (the); United States Minor Outlying Islands (the); United States of America (the); Uruguay; Venezuela (Bolivarian Republic of); Viet Nam; Virgin Islands (U.S.); Wallis and Futuna; Zambia; Zimbabwe.

**List of 13,925 scientist signatories of Ripple et al. (2020) (as of July 10, 2021):**

| Name                                | Professional Position and/or Discipline | Institution                                                                         | Country                        |
|-------------------------------------|-----------------------------------------|-------------------------------------------------------------------------------------|--------------------------------|
| Aalborg, Kim                        | Marine biologist                        | Norwegian institute for water sciences                                              | Norway                         |
| Aarbakke, Dr. Ole Nicolai Staurland | Marine biology                          |                                                                                     | Norway                         |
| Aarnoudse, Eefje                    |                                         | Center for International Development and Environmental Research, Giessen University | Germany                        |
| Aarssen, Lonnie                     | Professor of Biology                    | Queen’s University                                                                  | Canada                         |
| Aas, Wenche                         | Senior Scientist                        | NILU - Norwegian Institute for Air Research                                         | Norway                         |
| Aavik, Tsipe                        | Senior Research Fellow of Macroecology  | University of Tartu                                                                 | Estonia                        |
| Abad, Manuel                        | Researcher / Geology                    | Universidad de Atacama                                                              | Chile                          |
| Abadie, Juliet                      | PhD in ecology                          |                                                                                     | France                         |
| Abalos, Javier                      | Animal behaviour                        | University of Valencia                                                              | Spain                          |
| Abarca, Mariana                     | Insect ecologist                        | Georgetown University                                                               | United States of America (the) |
| Abate, Maria                        | Assistant Professor of Biology          | Simmons University                                                                  | United States of America (the) |

|                             |                                                       |                                                                                |                                                            |
|-----------------------------|-------------------------------------------------------|--------------------------------------------------------------------------------|------------------------------------------------------------|
| Abazajian, Kevork           | Professor of Physics & Astronomy                      | University of California, Irvine                                               | United States of America (the)                             |
| Abbate, Jessica             | Postdoctoral Researcher in Infectious Disease Biology | Institut de Recherche pour le Developpement                                    | France                                                     |
| Abbott, Brett               | Landscape Ecologist                                   |                                                                                | Australia                                                  |
| Abbott, Benjamin W.         | Assistant Professor of Ecosystem Ecology              | Brigham Young University                                                       | United States of America (the)                             |
| Abbott, Katherine           | Aquatic Ecology                                       |                                                                                | United States of America (the)                             |
| Abbott, Thorne              | Coastal & Shoreline Planner                           | University of Hawaii                                                           | United States of America (the)                             |
| Abd Malek, Muhamad Naim     | PhD candidate                                         | University of Science Malaysia                                                 | Malaysia                                                   |
| Abdelaal, Mohamed           | Associate Professor                                   | Mansoura University                                                            | Egypt                                                      |
| Abdelmoneim, Ahmed          |                                                       | Cornell University                                                             | United States of America (the)                             |
| Abdi, Asad                  | Manager director                                      | Zaminrizkavan Co. Ltd.                                                         | Iran (Islamic Republic of)                                 |
| Abel, David                 | Environmental Science                                 |                                                                                | United States of America (the)                             |
| Abel, Daniel                | Professor of Marine Science                           | Coastal Carolina University                                                    | United States of America (the)                             |
| Abella-Gutiérrez, Jose Luis | paleoceanography                                      | CICESE                                                                         | Mexico                                                     |
| Aben, Job                   | Ecology                                               | University of Antwerp                                                          | Belgium                                                    |
| Abessa, Denis               | Professor - Environmental Sciences                    | São Paulo State Univesity - UNESP                                              | Brazil                                                     |
| Able, Kenneth               | Professor Emeritus, Biological Sciences               | University at Albany, SUNY                                                     | United States of America (the)                             |
| Abonyi, Andras              | Postdoctoral Researcher / Freshwater Ecology          | WasserCluster Lunz (A) / MTA Centre for Ecology (H)                            | Hungary                                                    |
| abrahams, mark              | lecturer, wildlife conservation                       |                                                                                | United Kingdom of Great Britain and Northern Ireland (the) |
| ABRAM, NICOLA               | Spatial Scientist                                     | Living Landscape Alliance                                                      | United Kingdom of Great Britain and Northern Ireland (the) |
| Abramowitz, Brian           |                                                       | University of Florida (Florida Museum of Natural History)                      | United States of America (the)                             |
| Abrams, Melanie             |                                                       | UC Berkeley                                                                    | United States of America (the)                             |
| Abrams, Kym                 | Research fellow, evolutionary biology                 | The University of Western Australia                                            | Australia                                                  |
| Abrams, Peter               | Professor Emeritus, Ecology&Evolution                 | University of Toronto                                                          | Canada                                                     |
| Abrams, Jesse               | Postdoctoral Research Fellow                          | University of Exeter                                                           | United Kingdom of Great Britain and Northern Ireland (the) |
| Abramson, Michael           | Professor of Epidemiology                             | Monash University                                                              | Australia                                                  |
| Abreu, Paulo Cesar          | Professor - Microbial Ecology                         | Federal University of Rio Grande - FURG                                        | Brazil                                                     |
| Abrieu, Ariane              | Researcher (Biology)                                  | INSERM                                                                         | France                                                     |
| Abril Melgarejo, Valentina  | PhD student in Astrophysics                           | Laboratoire d'Astrophysique de Marseille (LAM) Aix-Marseille Université        | France                                                     |
| Abubakar, Ibrahim           | Laboratory technologist                               | Bayero University Kano, Nigeria                                                | Nigeria                                                    |
| Abutaha, Maged              | Researcher                                            | Desert Research Center                                                         | Egypt                                                      |
| Ac, Alexander               | post-doctoral researcher                              | Global Change Research Institute (CzechGlobe)                                  | Czech Republic (the)                                       |
| Acebes, Pablo               | Assistant Professor                                   | Departamento de Ecología. Facultad de Ciencias. Universidad Autónoma de Madrid | Spain                                                      |
| Acedo, Carmen               | Scientist, Botany                                     | Universidad de León                                                            | Spain                                                      |
| Acevedo, Francisca          | Agrobiodiversity Coordinator                          | CONABIO                                                                        | Mexico                                                     |
| Acevedo Ramos, Fernando     | Posdoctoral fellowship                                | Universidad Nacional Autónoma de México                                        | Mexico                                                     |
| Acevedo-Whitehouse, Karina  | Senior Lecturer                                       | Universidad Autonoma de Queretaro                                              | Mexico                                                     |

|                         |                                                                                                            |                                                                                        |                                                            |
|-------------------------|------------------------------------------------------------------------------------------------------------|----------------------------------------------------------------------------------------|------------------------------------------------------------|
| ACHARD, Frederic        | Senior Scientist                                                                                           | Joint Research Centre                                                                  | Italy                                                      |
| Acharjee, Santanu       | Assistant Professor                                                                                        | Debraj Roy College                                                                     | India                                                      |
| Achuff, Peter           | Scientist Emeritus                                                                                         | Parks Canada                                                                           | Canada                                                     |
| Ackels, Tobias          | Postdoctoral researcher in Neuroscience                                                                    | The Francis Crick Institute                                                            | United Kingdom of Great Britain and Northern Ireland (the) |
| Ackerman, Joe           | Research Associate, Dept Biosystems Engineering                                                            | University of Manitoba                                                                 | Canada                                                     |
| Acosta, Manuel          | Researcher                                                                                                 | Global Change Research Institute, Czech Academy of Sciences                            | Czech Republic (the)                                       |
| Acosta, Linda           | Doctorante de Ingénierie des systèmes industriels                                                          | Université de Lorraine                                                                 | France                                                     |
| Acosta Alba, Ivonne     | Environmental Analysis Expert                                                                              | Evalivo                                                                                | France                                                     |
| Acuña Míguez, Belén     | PhD Student                                                                                                | CSIC                                                                                   | Spain                                                      |
| Adam, Samiah            | Environmental management and ecology graduate                                                              | Monash University                                                                      | Mauritius                                                  |
| Adame, Fernanda         | Research Fellow, Wetland Ecology                                                                           | Griffith University                                                                    | Australia                                                  |
| Adams, Martin           | Archaeoentomologist                                                                                        | Paleoinsect Research                                                                   | United States of America (the)                             |
| Adams, Evan             | Quantitative Ecologist                                                                                     | Biodiversity Research Institute                                                        | United States of America (the)                             |
| Adams, Patrick          | PhD candidate / climate science and geomorphology                                                          | University of Queensland                                                               | Australia                                                  |
| Adamson, Jasper         | Senior Researcher                                                                                          | National Institute of Chemical Physics and Biophysics                                  | Estonia                                                    |
| Adamson, Evan           | Physics Student and Community Science Educator/Enthusiast (specializing in quantum physics and relativity) | CECI, Enriched Program (in addition to various university courses and lectures online) | Canada                                                     |
| Adan chici, Lidia       | Geologa                                                                                                    |                                                                                        | Spain                                                      |
| Adcock, Keryn           | Ecologist                                                                                                  | Independent & IUCN African Rhino Specialist Group                                      | South Africa                                               |
| Adebola, Aramide        | PhD Candidate/ Geography                                                                                   | University of Lagos                                                                    | Nigeria                                                    |
| Adekola, Olalekan       | Geography Lecturer                                                                                         | York St John University                                                                | United Kingdom of Great Britain and Northern Ireland (the) |
| Adhikari, Subodh        | Postdoctoral Researcher                                                                                    | University of Idaho                                                                    | United States of America (the)                             |
| Adibpour, Parvaneh      | Postdoc fellow/cognitive neuroscience                                                                      | Institute of cognitive sciences Marc Jeannerod                                         | France                                                     |
| adinugroho, wahyu catur | researcher                                                                                                 | forest research and development                                                        | Indonesia                                                  |
| Adjeroud, Mehdi         | Researcher                                                                                                 | IRD                                                                                    | France                                                     |
| Adkins, Sasha           | Lecturer                                                                                                   | Institute of Environmental Sustainability, Loyola University Chicago                   | United States of America (the)                             |
| Adkins, Collette        | Carnivore Conservation Director                                                                            | Center for Biological Diversity                                                        | United States of America (the)                             |
| Adman, Per              | Associate Professor in Political Science                                                                   | Uppsala University                                                                     | Sweden                                                     |
| Adogame, Leslie         | Executive Director/CEO                                                                                     | Sustainable Research and Action for Environmental Development                          | Nigeria                                                    |
| Adomavicius, Vytautas   | Sen. Eng., researcher                                                                                      | Kaunas University of Technology                                                        | Lithuania                                                  |
| Adorján, Balázs         | research assistant, environmental sciences                                                                 | University of Debrecen                                                                 | Hungary                                                    |
| Adriaens, Tim           | Ecologist                                                                                                  | INBO                                                                                   | Belgium                                                    |
| Adriaens, Dominique     | Full Professor                                                                                             | Universiteit Gent                                                                      | Belgium                                                    |
| Adua, Lazarus           | College Professor                                                                                          | University of Utah                                                                     | United States of America (the)                             |
| Aeby, Greta             | marine biologist                                                                                           | Qatar University                                                                       | Qatar                                                      |
| Affholder, Antonin      | PhD student, Ecology and Evolution                                                                         | École Normale Supérieure                                                               | France                                                     |

|                            |                                                                 |                                                                                             |                                                            |
|----------------------------|-----------------------------------------------------------------|---------------------------------------------------------------------------------------------|------------------------------------------------------------|
| Affigne, Tony              | Professor of Political Science                                  | Providence College                                                                          | United States of America (the)                             |
| Afonso, Eve                | Associate Professor                                             | University of Franche-Comté                                                                 | France                                                     |
| Agha, Ramsy                | Principal investigator Aquatic Ecology                          | Leibniz Institute of Freshwater Ecology and Inland Fisheries                                | Germany                                                    |
| Agnini, Claudia            | Associate professor                                             | Dept. of Geosciences- Università di Padova                                                  | Italy                                                      |
| Agostinho, Angelo          | Professor                                                       | Universidade Estadual de Maringá - PEA                                                      | Brazil                                                     |
| Agostini, Ilaria           | Researcher                                                      |                                                                                             | Argentina                                                  |
| Aguado Caso, Mateo         | Researcher in Sustainability Science                            | Social-Ecological Systems Laboratory, Department of Ecology, Universidad Autónoma de Madrid | Spain                                                      |
| Aguayo-Adán, Juan Antonio  | Biologist and PhD student                                       | University of Córdoba                                                                       | Spain                                                      |
| Aguir, Ludmilla MS         | Associate Professor                                             | Universidade de Brasília                                                                    | Brazil                                                     |
| Aguir, Ivana               | Chemist                                                         | Universidad de la República                                                                 | Uruguay                                                    |
| Aguir, Ludmilla M S        | Associate Professor                                             | Universidade de Brasília                                                                    | Brazil                                                     |
| Aguir, João Marcelo        | Post Doc in Entomology                                          | University of São Paulo                                                                     | Brazil                                                     |
| Aguilar, Ricardo           | Research & Expedition Director. Marine Biology.                 | Oceana                                                                                      | Spain                                                      |
| Aguilar, Alfredo           | Chairman Task Force Bioeconomy                                  | European Federation of Biotechnology                                                        | Belgium                                                    |
| Aguilar-Gonzalez, Bernardo | Executive Director/ Ecological Economics                        | Fundación Neotrópica                                                                        | Costa Rica                                                 |
| Aguilée, Robin             | Associate professor in ecology                                  | Université Paul Sabatier Toulouse 3                                                         | France                                                     |
| Aguilera, Eduardo          | Biologist                                                       | Technical University of Madrid                                                              | Spain                                                      |
| Aguirre, Luis F.           | Conservation Biology                                            | CBG UMSS                                                                                    | Bolivia (Plurinational State of)                           |
| Aguirre de Cárcer, Daniel  | Associate profesor, Genetics and microbial ecology              | Universidad Autónoma de Madrid                                                              | Spain                                                      |
| Aguirre-Ruiz, Ernesto      | Biologist - MSc Ecological Restoration.                         | Fundación Global Nature                                                                     | Spain                                                      |
| Agustina, Novillo          | Assistant Researcher                                            | IBN-CONICET                                                                                 | Argentina                                                  |
| Agyei-Ohemeng, James       | Lecturer                                                        | University of Energy and Natural Resources                                                  | Ghana                                                      |
| Ahasan, Rakibul            | PhD Student, Department of Geography                            | Texas A&M University                                                                        | United States of America (the)                             |
| Ahluwalia, Arti            | Professor of Bioengineering                                     | University of Pisa                                                                          | Italy                                                      |
| Ahmad, Nariman             | Assistant Professor                                             | Sulaimani University                                                                        | Iraq                                                       |
| Ahmad, Sate                | Research Associate / hydrology and environmental social science |                                                                                             | Bangladesh                                                 |
| Ahmad Yani, Andi           |                                                                 | Department of Administrative Science, Hasanuddin University                                 | Indonesia                                                  |
| Ahmed, Ayesha              | Biomedical Science                                              | University of Southampton                                                                   | United Kingdom of Great Britain and Northern Ireland (the) |
| Ahmed, Ahmed               | Emeritus Professor                                              | University of KwaZulu-Natal                                                                 | South Africa                                               |
| Ahrens, Dirk               | Biologist                                                       | Zoological Research Museum A. Koenig Bonn                                                   | Germany                                                    |
| Ahti, Pauliina             | Marine Biology/ PhD Candidate                                   | University of Jyväskylä                                                                     | Finland                                                    |
| Ahumada, Andrea            | Porfessor                                                       | Observatorio Astronomico de Cordoba                                                         | Argentina                                                  |
| Aidukaite, Jolanta         | Chief Researcher                                                | Lithuanian Social Research Centre                                                           | Lithuania                                                  |
| Ainley, David              | Research Ecologist                                              | an ecological consulting firm                                                               | United States of America (the)                             |
| Aitken, Sally              | Professor                                                       | University of British Columbia                                                              | Canada                                                     |
| Ajello, Claudia            | Research Assistant                                              | Department of Psychology                                                                    | Italy                                                      |
| Akama, Alberto             | Researcher                                                      | Museu Paraense Emilio Goeldi                                                                | Brazil                                                     |

|                                    |                                                                     |                                                                                                 |                                                            |
|------------------------------------|---------------------------------------------------------------------|-------------------------------------------------------------------------------------------------|------------------------------------------------------------|
| Al Naggar, Yahya                   | Alexander von Humboldt postdoctoral fellow                          | Martin-Luther-Universität Halle-Wittenberg Institut für Biologie, Lehrstuhl Allgemeine Zoologie | Germany                                                    |
| Ala, Ugo                           | Researcher                                                          | Dept. of Veterinary Sciences, University of Turin                                               | Italy                                                      |
| Alaback, Paul                      | Professor Emeritus, Forest Ecology                                  | University of Montana                                                                           | United States of America (the)                             |
| Alam, Muhammad Irfanul             |                                                                     | École des hautes études en santé publique, Paris                                                | France                                                     |
| Alam, Syed Ashraful                | Researcher & Operations and Networking Officer                      | University of Helsinki & ICOS (Integrated Carbon Observation System) ERIC                       | Finland                                                    |
| Alamillo, Josefa                   | Professor                                                           | Universidad de Córdoba                                                                          | Spain                                                      |
| Alamshah, Aubrey                   | Animal Behaviorist                                                  | Binghamton University                                                                           | United States of America (the)                             |
| alard, didier                      | professor of ecology                                                | university of bordeaux                                                                          | France                                                     |
| ALARIO-FRANCO, MIGUEL ANGEL        | Emeritus Proffesor and Member of Royal Academy of Sciences of Spain | UNIVERSIDAD COMPLUTENSE-MADRID                                                                  | Spain                                                      |
| Alaux, Cedric                      | Researcher                                                          | INRA                                                                                            | France                                                     |
| Alba, Annia                        | Researcher/Biological Sciences                                      | Institute Pedro Kouri of Tropical Medicine                                                      | Cuba                                                       |
| Albane, Barbero                    | PhD                                                                 | IGE                                                                                             | France                                                     |
| Albarella, Umberto                 | Professor of Zooarchaeology                                         | University of Sheffield (UK)                                                                    | United Kingdom of Great Britain and Northern Ireland (the) |
| Albarracin, Dolores                | Professor of Psychology and Business                                | University of Illinois at Urbana Champaign                                                      | United States of America (the)                             |
| ALBENNE, Cécile                    | Maître de Conférences                                               | Univeristé Paul Sabatier - Toulouse-3                                                           | France                                                     |
| Albers Grieneisen, Veronica        | Reader in Systems and Predictive Biology                            | Cardiff University                                                                              | United Kingdom of Great Britain and Northern Ireland (the) |
| Albert, James                      | Professor                                                           | University of Louisiana at Lafayette                                                            | United States of America (the)                             |
| ALBERT, Cécile                     | researcher                                                          | CNRS                                                                                            | France                                                     |
| Alberti, Paola                     | PHD Student                                                         | Neotropical Biodiversity Institute                                                              | Argentina                                                  |
| Alberti, Juan                      | Researcher / Ecology                                                | Instituto de Investigaciones Marinas y Costeras (IIMyC; UNMdP-CONICET)                          | Argentina                                                  |
| Alberti, Giorgio                   | Associate Professor in forest management                            | University of Udine                                                                             | Italy                                                      |
| Alberts, Allison                   | Chief Conservation and Research Officer                             | San Diego Zoo Global                                                                            | United States of America (the)                             |
| Albiero-Júnior, Alci               | PhD Student in Applied Ecology                                      | University of São Paulo, Luiz de Queiroz College of Agriculture                                 | Brazil                                                     |
| Albin, Roger                       | Professor of Neurology                                              | University of Michigan                                                                          | United States of America (the)                             |
| Albuquerque, Monica                | Marine Biology                                                      | EMEPC                                                                                           | Portugal                                                   |
| Alcantara, Suzana                  | Adjunt Professor/Evolution & Botany                                 | Universidade Federal de Santa Catarina (UFSC)                                                   | Brazil                                                     |
| Alcantara Concepcion, Pedro Camilo | Full Professor , land science and landscape ecology researcher      | Universidad de Guanajuato                                                                       | Mexico                                                     |
| Alcantara Rodriguez, Mireia        | PhD candidate Ethnobotany                                           | Leiden University / Faculty of Archaeology                                                      | Netherlands (the)                                          |
| Alcántara-Ayala, Irasema           | Full Professor, Disaster Risk Research                              | Institute of Geography, National Autonomous University of Mexico (UNAM)                         | Mexico                                                     |
| Alcántara-Manzanares, Jorge        |                                                                     | Universidad de Córdoba                                                                          | Spain                                                      |
| Alcaraz, Miquel                    | Research Professor, Marine Ecology                                  | CSIC                                                                                            | Spain                                                      |
| Alciatore, Giacomo                 | PhD candidate                                                       | DEE - University of Lausanne                                                                    | Switzerland                                                |
| Aldırmaz, Fatma                    | Accaunt and Finance Phd.                                            | Erzincan University                                                                             | Turkey                                                     |

|                         |                                                  |                                                                       |                                                            |
|-------------------------|--------------------------------------------------|-----------------------------------------------------------------------|------------------------------------------------------------|
| ALEDO, ANTONIO          | ASSOCIATE PROFESSOR, ENVIRONMENTAL SOCIOLOGY     | UNIVERSITY OF ALICANTE (SPAIN)                                        | Spain                                                      |
| Alemán, Deborah         | MD                                               | Instituto Nacional de Ciencias Médicas y Nutrición                    | Mexico                                                     |
| Alencar, Edna           | Anthropology Professor                           | Federal University of Pará - UFPA                                     | Brazil                                                     |
| Alex, Carmen            | Earth Science                                    | Prescott College                                                      | United States of America (the)                             |
| Alexanian, Yann         | PhD student, physics                             | Monsieur                                                              | France                                                     |
| Alfaro-Saiz, Estrella   | Research in plant conservation                   | Universidad de León                                                   | Spain                                                      |
| Alfieri, Lorenzo        | Scientific Officer                               | European Commission, Joint Research Centre                            | Italy                                                      |
| Alfonso, Leonardo       | Senior Lecturer in Hydroinformatics              | IHE Delft Institute for Water Education                               | Netherlands (the)                                          |
| Algueró-Muñiz, María    | PhD                                              | freelancer                                                            | United Kingdom of Great Britain and Northern Ireland (the) |
| Ali, Mir                | Retired                                          | AIM Corporation                                                       | Canada                                                     |
| Alibert, Clement        | Ph. D. Student                                   | ENS                                                                   | France                                                     |
| Alidoost Salimi, Parisa | Coral Reasercher                                 | Islamic Azad University                                               | Iran (Islamic Republic of)                                 |
| Alinsunurin, Jason      |                                                  | University of Bologna                                                 | Italy                                                      |
| Alizadeh, Ismaeil       | Senior Researcher                                |                                                                       | Iran (Islamic Republic of)                                 |
| Alkhalawi, Eman         | PhD student                                      | London School of Hygiene Tropical Medicine                            | Saudi Arabia                                               |
| ALLABABIDI, Nazih       | Phd student                                      | Université Rouen Normandie                                            | France                                                     |
| ALLAIN, Marc            | Assistant Professor                              | Aix Marseille Université                                              | France                                                     |
| Allan, Rita             | Ecologist                                        | Natural Heritage Program                                              | United States of America (the)                             |
| Allchin, Michael        | Researcher - seasonal snow-cover                 | University of Northern British Columbia                               | Canada                                                     |
| Allcock, Louise         | Professor of Zoology                             | National University of Ireland Galway                                 | Ireland                                                    |
| Allen, Julie            | Assistant Professor - Biology                    | University of Nevada Reno                                             | United States of America (the)                             |
| Allen, Rebecca          | Lecturer in Marine Zoology                       | Cornwall College                                                      | United Kingdom of Great Britain and Northern Ireland (the) |
| Allen, Andrew           | Postdoctoral Researcher                          | Radboud University                                                    | Netherlands (the)                                          |
| Allen, Warwick          | Postdoctoral Fellow                              | University of Canterbury                                              | New Zealand                                                |
| Allen, Chloe            | Animal management science                        | Durrell Wildlife Conservation Trust                                   | Jersey                                                     |
| Allen, Jont             | Professor of Electrical and Computer Engineering | University of Illinois, Urbana IL                                     | United States of America (the)                             |
| Allentoft, Morten       | Associate Professor                              | Globe Institute, University of Copenhagen                             | Denmark                                                    |
| Allgeier, Jacob         | assistant professor of ecology                   | University of Michigan                                                | United States of America (the)                             |
| Allhoff, Korinna        | researcher                                       | Institute of Evolution and Ecology                                    | Germany                                                    |
| ALLIER, Fabrice         | Ingenior agronomist/beekeeping                   | ITSAP-Institut de l'abeille                                           | France                                                     |
| Allio, Rémi             | PhD student, evolutionary biology                |                                                                       | France                                                     |
| Allison, Elizabeth      | Assoc. Professor of Ecology and Religion         | California Institute of Integral Studies                              | United States of America (the)                             |
| Allison, Taber          | Director of Research                             | American Wind Wildlife Institute                                      | United States of America (the)                             |
| Allison, Edward         | Professor of Marine Affairs                      | University of Washington                                              | United States of America (the)                             |
| Allouche, Joachim       | Researcher in nanoscience                        | CNRS                                                                  | France                                                     |
| Almedawar, Mohamad      | Molecular Cell Biology                           |                                                                       | Germany                                                    |
| Almeida, Malu           | PhD Student                                      | Faculdade de Filosofia, Ciências e Letras - Universidade de São Paulo | Brazil                                                     |

|                               |                                                                                 |                                                                              |                                                            |
|-------------------------------|---------------------------------------------------------------------------------|------------------------------------------------------------------------------|------------------------------------------------------------|
| Almeida, Mónica               | Biologist                                                                       | Escola Superior Agrária de Coimbra                                           | Portugal                                                   |
| Almeida, Sérgio Mendonça      | Professor and Researcher (Masters Program of Environmental Process Development) | Universidade Católica de Pernambuco - UNICAP                                 | Brazil                                                     |
| Almeida, José                 | PhD Student in Bioinformatics                                                   | EMBL-EBI                                                                     | United Kingdom of Great Britain and Northern Ireland (the) |
| Almeida Canova, Moara         | PhD student                                                                     | University of Campinas                                                       | Brazil                                                     |
| Almeida-Neto, Mario           | Professor                                                                       | Federal University of Goiás                                                  | Brazil                                                     |
| Almeida-Val, Vera             | Senior Researcher                                                               | Brazilian National Institute for Research in the Amazon                      | Brazil                                                     |
| Almgren, Mats                 | professor emeritus / Physical Chemistry                                         | Uppsala University                                                           | Sweden                                                     |
| Almonacid, Boris              | Research                                                                        | Global Change Science                                                        | Chile                                                      |
| Aloni, Irith                  | Ecology                                                                         | Ben Gurion University of the Negev                                           | Israel                                                     |
| Alonso, Cecilia               | Associate Professor, Microbial Ecologist                                        | Universidad de la República                                                  | Uruguay                                                    |
| Alonso, Rocio                 | Senior researcher in ecology                                                    | CIEMAT                                                                       | Spain                                                      |
| Alonso, Carlos                | Lecturer / Applied Limnology                                                    | Universidad Politécnica de Madrid                                            | Spain                                                      |
| Alonso-Alvarez, Carlos        | Staff Researcher                                                                | CSIC                                                                         | Spain                                                      |
| Alonso-Zarazaga, Miguel Angel | Tenured scientist - Entomologist (retired)                                      | Museo Nacional de Ciencias Naturales (CSIC)                                  | Spain                                                      |
| Alory, Gael                   | Researcher in physical oceanography                                             | University of Toulouse                                                       | France                                                     |
| ALOU, Chaker                  | Post Doc                                                                        | INSERM                                                                       | France                                                     |
| ALPINE, ANDREA                | Retired Senior Executive for the Department of Interior and aquatic ecologist   | United States Department of the Interior                                     | United States of America (the)                             |
| Alric, Benjamin               | Postdoctoral researcher                                                         | IRSTEA                                                                       | France                                                     |
| Alström, Per                  | Professor                                                                       | Uppsala University                                                           | Sweden                                                     |
| Altamirano, Maria             | Associate Profesor/ Botany                                                      | Universidad de Málaga                                                        | Spain                                                      |
| Altan-Ochir, Setsen           | Masters student (Geoscience)                                                    | Ecole Normale Supérieure                                                     | France                                                     |
| Altena, Bas                   | Postdoctoral Researcher / Glaciology                                            | University of Oslo                                                           | Norway                                                     |
| Alter, Elizabeth              | Associate Professor/Biology                                                     | York College/CUNY                                                            | United States of America (the)                             |
| Alter, Katharina              | Post-doc in marine animal ecophysiology                                         | Universität Hamburg                                                          | Germany                                                    |
| Alther, Roman                 | Ecology Postdoc                                                                 |                                                                              | Switzerland                                                |
| Altman, Ann                   | Retired                                                                         | Bioscript                                                                    | United States of America (the)                             |
| Altman, Jan                   | Researcher                                                                      | Institute of Botany of the CAS, v. v. i.                                     | Czech Republic (the)                                       |
| Altman-Kurosaki, Noam         | Marine Biology                                                                  | The University of Hawaii at Manoa                                            | United States of America (the)                             |
| Alvarenga, Renato             | PhD student in Fungal Biology                                                   | Universidade Federal de Pernambuco                                           | Brazil                                                     |
| Álvares, Francisco            | Post-doctoral Researcher, Wildlife Ecology                                      | CIBIO-InBIO, University of Porto                                             | Portugal                                                   |
| Alvarez, Ines                 | Scientific (Plant Science)                                                      | Real Jardin Botanico, Consejo Superior de Investigaciones Cientificas (CSIC) | Spain                                                      |
| Alvarez, Valentina            | Graduate Student                                                                | University of Hawaii                                                         | United States of America (the)                             |
| ALVAREZ, BRENDA               | PHD STUDENT                                                                     | CICTERRA-CONICET-UNC                                                         | Argentina                                                  |
| Álvarez, Valeria              | Agrobiotechnology engineer - PhD candidate                                      | CONICET - INTA                                                               | Argentina                                                  |
| Álvarez, Inés                 | Scientific on Plant Sciences                                                    | Real Jardín Botánico, CSIC                                                   | Spain                                                      |
| Álvarez Salgado, X. Anton     | Research Professor                                                              | Spanish Research Council                                                     | Spain                                                      |
| Álvarez-Álvarez, Pedro        | Professor of Forest Ecology and Management                                      | University of Oviedo                                                         | Spain                                                      |

|                            |                                                                                |                                                                                     |                                                            |
|----------------------------|--------------------------------------------------------------------------------|-------------------------------------------------------------------------------------|------------------------------------------------------------|
| Álvarez-Cansino, Leonor    | Postdoctoral Researcher Associate                                              | Department of Functional and Tropical Plant Ecology, University of Bayreuth         | Germany                                                    |
| Alvarez-Manjarrez, Julieta | PhD student                                                                    | Instituto de Biología, Universidad Nacional Autónoma de México                      | Mexico                                                     |
| Alvarez-Romero, Jorge      | Research Fellow                                                                | James Cook University                                                               | Australia                                                  |
| Alvarez-Salas, Luis        | Department Chief                                                               | Centro de Investigacion y de Estudios Avanzados del I.P.N.                          | Mexico                                                     |
| Alves, Marie-Hélène        | Research Engineer in Chemistry                                                 |                                                                                     | France                                                     |
| Alves, Rubana Palhares     | PhD student in Ecology                                                         | National Institute of Amazonian Research - INPA                                     | Brazil                                                     |
| Alves, Fátima              | Professor of Sociology                                                         | Universidade Aberta; Centre for Functional Ecology, University of Coimbra           | Portugal                                                   |
| Alves, Maria Alice S.      | Professor                                                                      | Universidade do Estado do Rio de Janeiro                                            | Brazil                                                     |
| Alves, Lia                 | Postdoctoral researcher                                                        |                                                                                     | Spain                                                      |
| Alves, Luiz                | Professor                                                                      | São Paulo University                                                                | Brazil                                                     |
| Alves, Jorge               |                                                                                | Faculdade de ciencias da universidade de lisboa                                     | Portugal                                                   |
| Alves, Ruy                 | Professor                                                                      | MUSEU NACIONAL, UNIVERSIDADE FEDERAL DO RIO DE JANEIRO                              | Brazil                                                     |
| Alves, Maria Isabel        | Master Student / Epidemiology                                                  | Faculdade de Medicina da Universidade de Lisboa                                     | Portugal                                                   |
| Alves, Isabel              | Ecology-Environmental Education                                                | NeoPangea Project                                                                   | Portugal                                                   |
| Alves-de-Souza, Catharina  | Research Professor (Phytoplankton Ecology)                                     | University of North Carolina Wilmington                                             | United States of America (the)                             |
| Alves-Pereira, Alessandro  | Post-doc                                                                       | State University of Campinas                                                        | Brazil                                                     |
| Alvord, Charlotte          | PhD Candidate in Ecotoxicology and environmental science                       | University of Gothenburg                                                            | Sweden                                                     |
| Amabilino, David           | Professor of Sustainable Chemistry                                             | University of Nottingham                                                            | United Kingdom of Great Britain and Northern Ireland (the) |
| Amadon, Alexis             | Physicist                                                                      | CEA-Saclay / NeuroSpin                                                              | France                                                     |
| Amador, Francisco          | Profesor Contratado Doctor / Departamento de Economía, Contabilidad y Finanzas | Universidad de La Laguna                                                            | Spain                                                      |
| Amador, Lucila             | Doctora en Ciencias Biológicas                                                 | Unidad Ejecutora Lillo (UEL: FML-CONICET)                                           | Argentina                                                  |
| Amani, Christian           | Forest ecologist                                                               | Université Officielle de Bukavu                                                     | Congo (the Democratic Republic of the)                     |
| Amaral, Maria C E          | Professor / Botany                                                             | Depto. Biol. Vegetal, Inst. Biologia Unicamp                                        | Brazil                                                     |
| Amarasinghe, Upali         | Senior Professor in Zoology                                                    | University of Kelaniya                                                              | Sri Lanka                                                  |
| Amarello, Melissa          | Executive Director                                                             | Advocates for Snake Preservation                                                    | United States of America (the)                             |
| Amaro, Teresa              | Researcher                                                                     | CIIMAR                                                                              | Portugal                                                   |
| Amaya, Iraida              | Researcher in plant biotechnology                                              | IFAPA, Junta de Andalucía                                                           | Spain                                                      |
| Ambrosini, Roberto         | Associate Professor of Ecology                                                 | University of Milan                                                                 | Italy                                                      |
| Amélineau, Françoise       | Postdoc, ecology                                                               | Norwegian Polar Institute                                                           | Norway                                                     |
| Ament, Judith              | PhD candidate                                                                  | Institute of Zoology, Zoological Society of London                                  | United Kingdom of Great Britain and Northern Ireland (the) |
| Amenu, Kebede              | Food Safety/Veterinary Epidemiology                                            | Addis Ababa University                                                              | Ethiopia                                                   |
| Amezcu, Felipe             | Research professor in fisheries and estuarine ecology                          | Instituto de Ciencias del Mar y Limnología, Universidad Nacional Autónoma de México | Mexico                                                     |

|                         |                                                           |                                                                                 |                                                            |
|-------------------------|-----------------------------------------------------------|---------------------------------------------------------------------------------|------------------------------------------------------------|
| Ameztegui, Aitor        | Researcher                                                | University of Lleida                                                            | Spain                                                      |
| Ameztoy, Iban           | Remote Sensing Analyst                                    |                                                                                 | Spain                                                      |
| Amici, Federica         | Post-Doc Researcher                                       | MPI for Evolutionary Anthropology                                               | Germany                                                    |
| Amiji, Burhan           | Senior Technical Officer                                  | Western Sydney University                                                       | Australia                                                  |
| AMILHAT, Elsa           | reseach ingenior                                          | Université de Perpignan UMR5110 CNRS-UPVD                                       | France                                                     |
| Amilk, Flora            | PhD student in aquatic biology                            | University Laval                                                                | Canada                                                     |
| Amin, Anam              | PhD Student                                               | Department of Land, Environment, Agriculture and Forestry, University of Padova | Italy                                                      |
| Ammarell, Gene          | Associate professor emeritus                              | Ohio Universiy                                                                  | United States of America (the)                             |
| Ammer, Christian        | Professor of Silviculture and Forest Ecology              | University of Göttingen                                                         | Germany                                                    |
| Amorim, Felipe          | Professor of Ecology                                      | São Paulo State University                                                      | Brazil                                                     |
| Amoroso, Mariano        | Scientist                                                 | CONICET                                                                         | Argentina                                                  |
| Amory, Charles          | post-doctoral researcher (FNRS) / polar climatology       | University of Liège                                                             | Belgium                                                    |
| Amos, Bonnie            | Professor, botany                                         | Angelo State University                                                         | United States of America (the)                             |
| Ampt, Eline             | PhD candidate Plant Ecology and Nature Conservation       | Wageningen University                                                           | Netherlands (the)                                          |
| Amputu, Vistorina       | Research Assistant                                        | University of Tuebingen                                                         | Namibia                                                    |
| Amy, Jean-Jacques       | Emeritus professor of Obstetrics & Gynaecology            | School of Medicine & Pharmacy, Vrije Universiteit Brussel, Brussels.            | Belgium                                                    |
| Ana B, Montero-Rocha    | Aquaculture Health Management                             |                                                                                 | Mexico                                                     |
| Ana Elena, Dumitriu     | Postdoc                                                   | IFIN-HH                                                                         | Romania                                                    |
| Anadon-Rosell, Alba     | Plant Ecologist                                           | University of Greifswald                                                        | Germany                                                    |
| Ancrenaz, marc          | Scientific Director                                       | HUTAN                                                                           | Malaysia                                                   |
| Andersen, Natalie       | PhD Researcher                                            | University of York                                                              | United Kingdom of Great Britain and Northern Ireland (the) |
| Andersen, Mikkel F.     | Assoc Prof in Physics                                     | University of Otago                                                             | New Zealand                                                |
| Andersen, Erin          | Environmental Science, Atmospheric Chemistry              | Indiana University - Bloomington                                                | United States of America (the)                             |
| Andersen, Henrik Rasmus | Professor, Environmental Engineering                      | Technical University of Denmark                                                 | Denmark                                                    |
| Andersen, Brannon       | Professor of Earth And Environmental Sciences             | Furman University                                                               | United States of America (the)                             |
| ANDERSEN, Ann           | Assistant Professor in Marine Biology                     | Sorbonne University                                                             | France                                                     |
| Anderson, Craig         | Scientist, Biogeochemistry and geomicrobiology            | The New Zealand Institute for Plant and Food Research                           | New Zealand                                                |
| Anderson, Jess          | MD                                                        |                                                                                 | Australia                                                  |
| Anderson, Jacob         | Geophysics Research Scientist                             | Boise State University                                                          | United States of America (the)                             |
| Anderson, David         | Professor                                                 | Wake Forest University                                                          | United States of America (the)                             |
| Anderson, Jacob         | PhD Student- Tropical Ecology                             | University of York                                                              | United Kingdom of Great Britain and Northern Ireland (the) |
| Anderson, Ileene        | Senior Scientist                                          | Center for Biological Diversity                                                 | United States of America (the)                             |
| Anderson, James         | Davis-Michael Professor of Forestry and Natural Resources | West Virginia University                                                        | United States of America (the)                             |
| Anderson, Molly         | Food Studies                                              | Middlebury College                                                              | United States of America (the)                             |
| Anderson, Judith        | Retired biologist                                         |                                                                                 | Canada                                                     |
| Anderson, Liana         | Researcher/Environmental Change in Amazonia               | Cemaden                                                                         | Brazil                                                     |

|                           |                                                      |                                                                                          |                                                            |
|---------------------------|------------------------------------------------------|------------------------------------------------------------------------------------------|------------------------------------------------------------|
| Anderson, Steven          | Prof. Emeritus, Biological sciences                  | University of the Pacific                                                                | United States of America (the)                             |
| Anderson, Iris            | Professor of Marine Science                          | Virginia Institute of Marine Science, William & Mary                                     | United States of America (the)                             |
| Anderson, William         | Profeesor emeritus                                   | Grice Marine Biological Laboratory                                                       | United States of America (the)                             |
| Anderson, Laurel          | Professor of plant ecology                           | Ohio Wesleyan University                                                                 | United States of America (the)                             |
| Anderson, John            | Associate Lecturer, Physics                          | University of North Florida                                                              | United States of America (the)                             |
| Anderson, Albert          | PhD in Physics, 1968                                 | Stanford University                                                                      | United States of America (the)                             |
| Anderson, James           | Energy & Environmental Policy                        | University of Mississippi                                                                | United States of America (the)                             |
| Andersson, David          | PhD                                                  | University of Gothenburg                                                                 | Sweden                                                     |
| Andersson, Maöte          | Professor emeritus, Animal Ecology                   | Department of Biology and Environment, University of Gothenburg                          | Sweden                                                     |
| Andersson, Karolin        | PhD Student Rural Development                        | Swedish University of Agricultural Sciences                                              | Sweden                                                     |
| Andersson Bruck, Kjerstin | PhD, Lecturer in Socal Work                          | Örebro University                                                                        | Sweden                                                     |
| Andivia, Enrique          | Postdoctoral researcher                              | Universidad Complutense de Madrid                                                        | Spain                                                      |
| Andrade, Pedro            | PhD student, Biological sciences                     | CIBIO/InBIO, University of Porto                                                         | Portugal                                                   |
| Andrade, Charlene         | Environmental scientist                              | Washington State Department of Commerce                                                  | United States of America (the)                             |
| Andrade, Sonia            | Assistant Professor                                  | USP                                                                                      | Brazil                                                     |
| Andrade, Daniel           | Professor of Environmental Economics                 | Federal University of Uberlândia (Brazil) and Brazilian Society for Ecological Economics | Brazil                                                     |
| Andrade, André            | PhD Student                                          | Universidade Federal de Goiás                                                            | Brazil                                                     |
| ANDRADE, ANTONIO CARLOS   | Researcher in Seed ecology and Plant Sciences        | Rio de Janeiro Botanic Garden Research Institute                                         | Brazil                                                     |
| Andrade-Núñez, María José | Instructor/Teacher, PhD Environmental Science        | University of Puerto Rico                                                                | Puerto Rico                                                |
| Andrae, Dirk              | Physical and Theoretical Chemistry                   | Freie Universität Berlin                                                                 | Germany                                                    |
| andre, nicolas            | researcher in astrophysics                           | IRAP                                                                                     | France                                                     |
| André, Thiago             | Professor of Genetics                                | Universidade Federal do Oeste do Para                                                    | Brazil                                                     |
| André, Hampus             | PhD candidate, Industrial Ecology                    | Chalmers University of Technology                                                        | Sweden                                                     |
| Andreatta, Maria Marta    | PhD in Health Sciences.                              | CIECS, CONICET y UNC                                                                     | Argentina                                                  |
| Andreeff, Walter          | Applied Environmental Geologist                      | Métis Nation of Alberta                                                                  | Canada                                                     |
| Andrello, Marco           | Researcher                                           | Institut de Recherche pour le Développement                                              | France                                                     |
| ANDREONE, FRANCO          | Zoologist                                            | Museo Regionale di Scienze Naturali, Torino                                              | Italy                                                      |
| Andres-Penares, Daniel    | Researcher during PhD, Material Science              | University of Valencia                                                                   | Spain                                                      |
| Andresen, Niek            | PhD Candidate                                        | TU Berlin                                                                                | Germany                                                    |
| ANDRESEN, ELLEN           | PROFESSOR OF ECOLOGY                                 | UNIVERSIDAD NACIONAL AUTOMOMA DE MEXICO                                                  | Mexico                                                     |
| andrew, scott             | lecturer/researcher                                  | charles sturt university                                                                 | Australia                                                  |
| Andrew, Nigel             | Professor of Entomology                              | University of New England                                                                | Australia                                                  |
| Andrews, Clare            | Postdoctoral Research Associate, Behavioural Biology | Newcastle University                                                                     | United Kingdom of Great Britain and Northern Ireland (the) |
| Andrews, Samantha         | PhD Researcher, Marine Biology/Ecology               | Memorial University, Newfoundland                                                        | Canada                                                     |
| Andrews, Jane             | Ecosystems advisor                                   |                                                                                          | New Zealand                                                |
| Andrieu, Bruno            | Senior scientist / Ecophysioilgist                   | INRA                                                                                     | France                                                     |
| Andriguetto, Jose         | Professor of Anima Science and Veterinary Medicine   | Federal University of Parana State                                                       | Brazil                                                     |

|                                   |                                                  |                                                                          |                                                            |
|-----------------------------------|--------------------------------------------------|--------------------------------------------------------------------------|------------------------------------------------------------|
| Andriguetto-Filho, José Milton    | Professor of Environmental Sciences              | Universidade Federal do Paraná                                           | Brazil                                                     |
| Andruchow, Ileana                 | Researcher                                       | IALP - CONICET                                                           | Argentina                                                  |
| Aney, Warren                      | Wildlife Ecology                                 | Oregon Department of Fish & Wildlife; Resources Northwest Consultants    | United States of America (the)                             |
| Anfodillo, Tommaso                | Professor of Forest Ecology                      | University of Padova, Dept. TESAF                                        | Italy                                                      |
| Angelstam, Peril                  | Professor, sustainability science                | Swedish University of Agricultural Sciences                              | Sweden                                                     |
| Angerhausen, Daniel               | Research Fellow                                  | Center for Space and Habitability - Bern University                      | Switzerland                                                |
| Anglaret, Xavier                  | Senior Researcher in Infectious Diseases         | University of Bordeaux                                                   | France                                                     |
| Angles, Mark                      | PhD Microbiology                                 |                                                                          | Australia                                                  |
| Angulo, Arturo                    | Research associate                               | University of Costa Rica                                                 | Costa Rica                                                 |
| Angulo, Maria Cecilia             | Neuroscience                                     | CNRS                                                                     | France                                                     |
| Angulo, Elena                     | Researcher                                       |                                                                          | Spain                                                      |
| Anholetto Junior, Claudio Roberto | Program Coordinator                              | Mamirauá Institute for Sustainable Development                           | Brazil                                                     |
| Anjos, Diego                      | Post doc in Ecology                              | Federal University of Uberlândia                                         | Brazil                                                     |
| Anna, Kondratyeva                 | PhD                                              | MNHN                                                                     | France                                                     |
| Annamaria, Fenesi                 | Invasion ecologist                               | Babes-Bolyai University                                                  | Romania                                                    |
| Annonier, Marianne                | PhD student                                      | Institut des Sciences de l'Evolution de Montpellier (ISEM)               | France                                                     |
| Annys, Sofie                      | PhD student in Physical Geography                | Ghent University                                                         | Belgium                                                    |
| Anquetin, Guillaume               | Assistant Professor in Chemistry                 | Université de Paris - Université Paris Diderot                           | France                                                     |
| Anquetin, Sandrine                | Senior scientist                                 | CNRS - IGE                                                               | France                                                     |
| Anschütz, Anna-Adriana            | PhD student of marine biology                    | Swansea University                                                       | United Kingdom of Great Britain and Northern Ireland (the) |
| Anselmetti, Yoann                 | Post-doctoral researcher                         | Institut des Sciences de l'Evolution de Montpellier (ISEM - UMR5554)     | France                                                     |
| Anson, Jennifer                   | Ecologist                                        | Australian Wildlife Conservancy                                          | Australia                                                  |
| ANSTETT, Marie Charlotte          | Senior researcher                                | CNRS                                                                     | France                                                     |
| Anta, Adolfo                      | Senior Researcher, Power Systems                 | AIT                                                                      | Austria                                                    |
| Ante-Testard, Pearl Anne          | PhD candidate                                    | Conservatoire national des Arts et Métiers                               | France                                                     |
| Anthony, Francois                 | Director of research                             | IRD                                                                      | France                                                     |
| Anthony, Carl                     | Professor, Biology                               | John Carroll University                                                  | United States of America (the)                             |
| Antiqueira, Pablo                 | Post doc                                         | Unicamp                                                                  | Brazil                                                     |
| Antoine, Pierre-Olivier           | Professor, Paleontology                          | Institut des Sciences de l'Evolution de Montpellier, UM, CNRS, IRD, EPHE | France                                                     |
| Antón-Pacheco, Carmen             | Geologist (retired)                              | Instituto Geológico y Minero de España                                   | Spain                                                      |
| ANTONA, Martine                   | Researcher/ Institutional & ecological economics | CIRAD                                                                    | France                                                     |
| Antunes-Carvalho, Caio            | Professor of Zoology                             | Universidade Federal Fluminense                                          | Brazil                                                     |
| Aouacheria, Abdel                 | Researcher in Biology                            | CNRS                                                                     | France                                                     |
| Appel, Oliver                     | Atmospheric research, PostDoc                    | Max Planck Institute for Chemistry                                       | Germany                                                    |
| Appert-Rolland, Cecile            | Researcher in Theoretical Physics                | CNRS, University Paris-Saclay, University Paris-Sud                      | France                                                     |
| Applebaum, David                  | Professor of Mathematics                         | University of Sheffield                                                  | United Kingdom of Great Britain and Northern Ireland (the) |

|                                |                                                                                           |                                                                                                               |                                                            |
|--------------------------------|-------------------------------------------------------------------------------------------|---------------------------------------------------------------------------------------------------------------|------------------------------------------------------------|
| Appleby, Rob                   | Researcher/Environmental Futures Research Institute (EFRI)                                | Griffith University                                                                                           | Australia                                                  |
| Applegate, Roger               | Wildlife Ecology and Physiology                                                           | University of Tennessee                                                                                       | United States of America (the)                             |
| Applequist, Wendy              | Associate Curator                                                                         | Missouri Botanical Garden                                                                                     | United States of America (the)                             |
| AQUILINA, Luc                  | Professor                                                                                 | University Rennes 1                                                                                           | France                                                     |
| Aquino, Adriana                | Ichthyologist, Research Associate                                                         | American Museum of Natural History                                                                            | United States of America (the)                             |
| Aragón, Pedro                  | Researcher                                                                                | Museo Nacional de Ciencias Naturales (CSIC)                                                                   | Spain                                                      |
| Arampankudy, Jimson            | Medical Doctor                                                                            | Somatheeram Health Group                                                                                      | India                                                      |
| Arana, Inés                    | Microbiology                                                                              | University of the Basque Country                                                                              | Spain                                                      |
| Aranda, Daniel                 | PhD Student, Evolutionary Biology                                                         | Max Planck Institute for Ornithology                                                                          | Germany                                                    |
| Aranda Lastra, Manuel          | Associate Professor Marine Molecular Ecology                                              | King Abdullah University of Science and Technology                                                            | Saudi Arabia                                               |
| Araujo, Francisca              | Professor                                                                                 | Federal University of Ceará                                                                                   | Brazil                                                     |
| Araújo, Márcia                 | PhD student                                                                               | Faculty of Sciences, University of Porto                                                                      | Portugal                                                   |
| Arbe Montoya, Alejandra        | Veterinarian                                                                              | The University of Adelaide                                                                                    | Australia                                                  |
| Arbor, Sage                    | Computational Biology                                                                     | Marian University College of Medicine                                                                         | United States of America (the)                             |
| Arce -Funck, Julio             | Marie Curie fellow, aquatic ecology and ecotoxicology                                     | MARE - Marine and Environmental Sciences Center- University of Coimbra                                        | Portugal                                                   |
| Arce Peña, Norma P.            | PhD Candidate                                                                             | Universidad Nacional Autónoma de México                                                                       | Mexico                                                     |
| Arcela, Augusto                | Ecologist                                                                                 | Universidade de Brasília                                                                                      | Brazil                                                     |
| Archambault, Axel              | Food R&D Engineer - dipl. Engineer in Biomass Valorization, Agriculture and Food Industry | PM International AG                                                                                           | Luxembourg                                                 |
| Archambault, Philippe          | Professor                                                                                 | Université laval                                                                                              | Canada                                                     |
| Archer-Nicholls, Scott         | Postdoc, atmospheric chemistry                                                            | University of cambridge                                                                                       | United Kingdom of Great Britain and Northern Ireland (the) |
| Arck, Yannis                   | Graduate research assistant                                                               | Herr                                                                                                          | Germany                                                    |
| Arenas, Concepcion             | Professor. Statistics                                                                     | University of Barcelona                                                                                       | Spain                                                      |
| Arenas Gonzálz, Rafael         | Biologo                                                                                   | Consejeria medio Ambiente. Junta Andalucía                                                                    | Spain                                                      |
| Arens, Susanne                 | Postdoc Geobiology                                                                        | Globe Institute, University of Copenhagen                                                                     | Denmark                                                    |
| Arfan, Muhammad                | PhD                                                                                       | University of Gävle                                                                                           | Sweden                                                     |
| Arfanzaman, Md.                | National Expert (Environment & Climate Change)                                            | The Food and Agriculture Organization of the United Nations (FAO)                                             | Bangladesh                                                 |
| Arfin-Khan, Mohammed Abu Sayed | Associate Professor                                                                       | Department of Forestry and Environmental Science, Shahjalal University of Science and Technology, Sylhet-3114 | Bangladesh                                                 |
| Arguelolo, Ricardo             | Electrical Engineer                                                                       | Independent Writer "How to Predict an Environmental Crisis" In search of a Simpler Economy                    | Costa Rica                                                 |
| Arguiñena, José Luis           | Arquitecto                                                                                | Arquitecto Independiente                                                                                      | Argentina                                                  |
| Arias, Mónica                  | Biologist                                                                                 | Centre of Evolutionary and Functional Ecology                                                                 | France                                                     |
| Arias González, Jesús Ernesto  | Professor                                                                                 | Centro de Investigación y de Estudios Avanzados del I.P.N.                                                    | Mexico                                                     |
| Arias Jimenez, Juan Carlos     | Biologist                                                                                 | Universidad del Zulia                                                                                         | Venezuela (Bolivarian Republic of)                         |
| Arias Ortiz, Angela            | Marine biologist                                                                          | Fundacion Gente y Ambiente                                                                                    | Colombia                                                   |

|                             |                                                                                           |                                                       |                                                            |
|-----------------------------|-------------------------------------------------------------------------------------------|-------------------------------------------------------|------------------------------------------------------------|
| Aristegui, Javier           | Professor                                                                                 | Universidad de Las Palmas de Gran Canaria             | Spain                                                      |
| Ariz, Idoia                 | Researcher                                                                                | Universidad de Navarra                                | Spain                                                      |
| Ariza, María Alejandra      | Estudiante biología                                                                       | Pontificia universidad Javeriana                      | Colombia                                                   |
| Ärje, Johanna               | Post doc, statistics                                                                      |                                                       | Finland                                                    |
| Arlt, Debora                |                                                                                           | Sweish University of Agricultural Sciences            | Sweden                                                     |
| Arman Kalkandeler, Ayse     | Psychology                                                                                | Uludag University                                     | Turkey                                                     |
| Armbrrecht, Inge            | Full Professor                                                                            | Universidad del Valle, Cali                           | Colombia                                                   |
| Armbruster, W. Scott        | Principal Research Scientist                                                              | University of Alaska Fairbanks                        | United States of America (the)                             |
| Armendariz, Laura Cecilia   | Docente Investigador                                                                      | Instituto de Limnología "Dr. Raul Ringuelet" (ILPLA)  | Argentina                                                  |
| Armenteras, Dolors          | Associate Professor                                                                       | Universidad Nacional de Colombia                      | Colombia                                                   |
| Armitage, Sophie            | Group leader/Researcher                                                                   | Freie Universitaet Berlin                             | Germany                                                    |
| Armitage, Kenneth           | Distinguished Professor Emeritus of Ecology & Evolutionary Biology                        | The University of Kansas                              | United States of America (the)                             |
| Armstrong, Doug             | Professor of Conservation Biology                                                         | Massey University                                     | New Zealand                                                |
| Armstrong, Bruce            | Emeritus Professor, Public Health                                                         | University of Sydney                                  | Australia                                                  |
| Armstrong, Joel             | Post Doctoral Fellow, Psychology                                                          | University of Western Ontario                         | Canada                                                     |
| Arn, Luise                  | Data Scientist                                                                            | University of Zurich/ ETH                             | Switzerland                                                |
| Arnaud, Patrick             | Researcher in hydrology                                                                   | IRSTEA                                                | France                                                     |
| ARNAUD HAOND, Sophie        | Researcher                                                                                | Ifremer                                               | France                                                     |
| Arnfield, John              | Professor Emeritus (Geography, Atmospheric Sciences)                                      | The Ohio State University                             | United Kingdom of Great Britain and Northern Ireland (the) |
| Arnillas, Carlos Alberto    | Postdoctoral fellow, ecological modelling                                                 | University of Toronto - Scarborough                   | Canada                                                     |
| Arnold, Gilles              | Mechanics - ecodesign                                                                     | Université de Haute Alsace                            | France                                                     |
| Arnold, Todd                | Senior Technical Staff Member                                                             | IBM                                                   | United States of America (the)                             |
| Arnold, Steven              | Biochemist                                                                                | Pathology Queenslad                                   | Australia                                                  |
| Arnold, Madison             | MSc Graduate Student                                                                      | University of British Columbia Okanagan               | Canada                                                     |
| Arnolda, Leonard            | Clinical Director, Illawarra Health & Medical Research Institute/ Professor of Cardiology | Illawarra Health & Medical Research Institute         | Australia                                                  |
| Arnott, Chelsea             | Planner                                                                                   | Hawaii Invasive Species Council                       | United States of America (the)                             |
| Arnscheidt, Joerg           | Senior Lecturer / Earth Systems Sciences                                                  | Ulster University                                     | United Kingdom of Great Britain and Northern Ireland (the) |
| Arnsperger, Christian       | Professor in sustainability                                                               | University of Lausanne                                | Switzerland                                                |
| Arora, Ramesh               | Sr Entomologist                                                                           | Punjab Agricultural University, Ludhiana, India       | India                                                      |
| Arosio, Diego               | Associate Professor of Applied Geophysics I                                               | Università degli studi di Modena e Reggio Emilia      | Italy                                                      |
| Arranz, Ignasi              | postdoc                                                                                   | University of Vic-UCC                                 | Spain                                                      |
| ARREBOLA BURGOS, JOSE RAMON | Professor/Doctor in Biology                                                               | University of Seville                                 | Spain                                                      |
| Arridge, Christopher        | Royal Society Research Fellow and Reader in Space Physics                                 | Lancaster University                                  | United Kingdom of Great Britain and Northern Ireland (the) |
| Arrieta, Ezequiel           | PhD Fellow                                                                                | National Council of Scientific and Technical Research | Argentina                                                  |
| Arrighi, Pablo              | Professor                                                                                 | Aix-Marseille Université                              | France                                                     |
| arrojo, fernanda            | nephrologist                                                                              | H A Marcide                                           | Spain                                                      |

|                          |                                                             |                                                                   |                                                            |
|--------------------------|-------------------------------------------------------------|-------------------------------------------------------------------|------------------------------------------------------------|
| Arrondo, Eneko           | Phd. candidate                                              | Estacion Biologica de Doñana                                      | Spain                                                      |
| Arrouays, Dominique      | Sebior soil scientist                                       | INRA InfoSol Unit, F-45075 Orleans                                | France                                                     |
| Arroyo Oori, Ken         | 3D Geoinformation                                           | Delft University of Technology                                    | Netherlands (the)                                          |
| Arroyo-Cabrales, Joaquin | Paleontologist                                              | Instituto Nacional de Antropologia e Historia                     | Mexico                                                     |
| ARROYO-CABRALES, JOAQUIN | SENIOR SCIENTIST                                            | INSTITUTO NACIONAL DE ANTROPOLOGIA E HISTORIA                     | Mexico                                                     |
| Arroyo-Rodríguez, Víctor | Senior Researcher                                           | Universidad Nacional Autónoma de México                           | Mexico                                                     |
| Arshava, Natali          | Molecular biology                                           | biological laboratory of Schelkovo Agrohim JSC                    | Russian Federation (the)                                   |
| Arsovski, Dragan         | Ecology and conservation with specialty in herpetology      | Macedonian Ecological Society                                     | Macedonia, Republic of (the former Yugoslavia)             |
| Art, Henry               | Professor of Environmental Studies & Biology                | Williams College                                                  | United States of America (the)                             |
| Artaxo, Paulo            | Professor of Environmental Physics                          | University of Sao Paulo                                           | Brazil                                                     |
| Artelsmair, Markus       | PhD student in Chemistry                                    | AstraZeneca/University of Aberdeen                                | Sweden                                                     |
| Artes, Juan              | Assistant Prof Biochemistry                                 | UML                                                               | United States of America (the)                             |
| Arthur, Claire           |                                                             | University of Cambridge                                           | United Kingdom of Great Britain and Northern Ireland (the) |
| Artigau, Etienne         | Research associate, astrophysics                            | Université de Montréal                                            | Canada                                                     |
| Artim, John              | Temporary Assistant Professor, Biology                      | Arkansas State University                                         | United States of America (the)                             |
| Aruna, Edward            | Founder/Managing Director                                   | Reptile and Amphibian Program - Sierra Leone                      | Sierra Leone                                               |
| Arvesen, Anders          | Researcher, Industrial ecology                              | Norwegian University of Science and Technology (NTNU)             | Norway                                                     |
| Arvo, Roger              | Biologist & Mathematician - Computer Consultant & Architect | Bio-Mathematics B.S. from Michigan Tech University                | United States of America (the)                             |
| Arvor, Damien            | Researcher                                                  | CNRS                                                              | France                                                     |
| Arzel, Céline            | Researcher in Waterbird and Wetland Ecology                 | University of Helsinki                                            | Finland                                                    |
| Ascensão, Fernando       | Postdoc researcher                                          | CIBIO - Research Center in Biodiversity and Genetic Resources     | Portugal                                                   |
| Aschenbrenner, Paula     | Junior Scientist, climate impact                            | Potsdam Institute for Climate Impact Research                     | Germany                                                    |
| Ascher, John             | Assistant Professor, Department of Biological Sciences      | National Univeristy of Singapo                                    | Singapore                                                  |
| Ascherio, Alberto        | Professor of Epidemiology and Nutrition                     | Harvard                                                           | United States of America (the)                             |
| Ascoli, Davide           | Researcher in forest sciences                               | University of Torino                                              | Italy                                                      |
| Asgarifar, Samin         | Condensed matter Physics Phd                                |                                                                   | Iran (Islamic Republic of)                                 |
| Ashby, Auriol            | Environmental Social Science consultant                     | Ashby Associates CC                                               | Namibia                                                    |
| Ashcroft, John           | Atmospheric Dynamics                                        | Universitu of Leeds                                               | United Kingdom of Great Britain and Northern Ireland (the) |
| Ashford, Graham          | Senior Lecturer, Environmental and Resource Economics       | University of the Sunshine Coast                                  | Australia                                                  |
| Ashton, Glenn            | Geographical systems.                                       | Centre for Complex Systems in Transition, Stellenbosch University | South Africa                                               |
| Ashton, Ben              | Postdoctoral Researcher/Biological Sciences                 | Macquarie University                                              | Australia                                                  |
| Ashton-butt, Adham       | Senior Research Ecologist                                   | British Trust for Ornithology                                     | United Kingdom of Great Britain and Northern Ireland (the) |

|                           |                                                          |                                                                  |                                                            |
|---------------------------|----------------------------------------------------------|------------------------------------------------------------------|------------------------------------------------------------|
| Ask, Jenny                | Assistant professor                                      | EMG, Umeå University                                             | Sweden                                                     |
| Asplund, Maria            | Postdoc - genomics                                       | The Globe institute                                              | Denmark                                                    |
| Assali, Julien            | Biotechnology                                            | Private company                                                  | Guatemala                                                  |
| asselman, pieter          | lab technician                                           | Meise Botanic Garden                                             | Belgium                                                    |
| Assmz, Philipp            | Biological Oceanography                                  | Norwegian Polar Institute                                        | Norway                                                     |
| Astorga, Giselle          | Paleobotany                                              | Universidad Austral de Chile                                     | Chile                                                      |
| Astúa, Diego              | Associate Professor - Zoology                            | Universidade Federal de Pernambuco                               | Brazil                                                     |
| Atanassov, Nicholay       | Lecturer of animalbreeding                               |                                                                  | Bulgaria                                                   |
| Ataro, Assefa             | Forest Resource and Ecological Restoration               | SNNPRS Environment Forest and Climate Change Control Authority   | Ethiopia                                                   |
| Atchison, Brad            | Molecular Biologist                                      | Retired; Environmental Activist and Educator                     | Canada                                                     |
| Atkins, Kelly             | PhD Student, Biology                                     | University of Exeter                                             | United Kingdom of Great Britain and Northern Ireland (the) |
| Atkins, Melissa           | Graduate Assistant Zoology                               | University of Hawai’ i at Manoa                                  | United States of America (the)                             |
| Atkinson, Karina          | Executive Director                                       | Fundacion Para La Tierra                                         | Paraguay                                                   |
| Atkinson, Quentin         | Professor of Psychology                                  | University of Auckland                                           | New Zealand                                                |
| Atmadja, Stibniati        | Economist                                                | Center for International Forestry Research (CIFOR)               | Indonesia                                                  |
| Atreya, Kishor            | Research Lead                                            | PHASE Nepal                                                      | Nepal                                                      |
| Attanasio, Cláudia        | Scientific researcher; ecological restoration            | Secretary of Agriculture and Supply of the State of São Paulo    | Brazil                                                     |
| Attias, Nina              | Post-doctoral fellow                                     | Federal University of Mato Grosso do Sul                         | Brazil                                                     |
| Attorre, Fabio            | Professor of Environmental Science                       | Sapienza University of Rome                                      | Italy                                                      |
| Attwood, Colin            | Associate Professor, Marine Ecology                      | University of Cape Town                                          | South Africa                                               |
| Atzberger, Clement        | Professor in Remote Sensing and Earth Observation        | University of Natural Resources and Life Sciences (BOKU), Vienna | Austria                                                    |
| Aubert, Alice             | Scientific officer                                       |                                                                  | France                                                     |
| Aubert, Alice             | Postdoctoral scientist                                   | Eawag                                                            | Switzerland                                                |
| Audi, Georges             | Directeur de Recherche au CNRS - Nuclear Physics         | CNRS                                                             | France                                                     |
| Audic, Guillaume          | Engineer                                                 | Institute of Structural Biological                               | France                                                     |
| Audouin, Laurent          | Associated professor, Nuclear Physics                    | Université Paris-Sud                                             | France                                                     |
| Auge, Harald              | Senior Scientist, Biology                                | Helmholtz-Centre for Environmental Research - UFZ                | Germany                                                    |
| Auger, Matthis            | PhD, Physical Oceanography                               | Sorbonne Université                                              | France                                                     |
| Augeri, Dave              | Director and Associate Professor of Conservation Biology | Biodiversity Unlimited Research and Consulting Group             | United States of America (the)                             |
| Augiron, Steve            | Biology of conservation                                  | Augiron                                                          | France                                                     |
| Augsten, Mariana          | PhD Student                                              | UFMG                                                             | Brazil                                                     |
| Augustinus, Benno Andreas | PhD student, Ecology                                     | CABI                                                             | Switzerland                                                |
| Augusto, Laurent          | Senior scientist                                         | INRA                                                             | France                                                     |
| AUGUSTO, RONALDO          | Postdoc Researcher                                       | CNRS                                                             | France                                                     |
| Aukema, Brian             | Associate Professor of Forest Entomology                 | University of Minnesota                                          | United States of America (the)                             |
| Auliya, Mark              | Postdoc                                                  | Zoological Research Museum Alexander Koenig                      | Germany                                                    |
| Aumont, Olivier           | Oceanography                                             | IRD-IPSL-LOCEAN                                                  | France                                                     |

|                         |                                                         |                                                                                                      |                                                |
|-------------------------|---------------------------------------------------------|------------------------------------------------------------------------------------------------------|------------------------------------------------|
| aumtong, suphathida     | MJU lect.                                               | MJU                                                                                                  | Thailand                                       |
| Aurélien, Pascal        | PhD student in Astrophysics                             | Observatoire de Paris                                                                                | France                                         |
| Aurette, Didier         | Associate Professor population genetics                 | Aix-Marseille University                                                                             | France                                         |
| Ausma, Ties             | PhD candidate                                           | University of Groningen                                                                              | Netherlands (the)                              |
| Auster, Peter           | Professor Emeritus & Senior Research Scientist          | University of Connecticut & Mystic Aquarium                                                          | United States of America (the)                 |
| Austin, Andy            | Professor, Systematics and Entomology                   | University of Adelaide                                                                               | Australia                                      |
| Austnes, Kari           | Research Scientist                                      | Norwegian Institute for Water Research                                                               | Norway                                         |
| Autin, Philémon         | PhD in glaciology                                       | IGE                                                                                                  | France                                         |
| Auzias, Guillaume       | Researcher                                              | CNRS, Institut des Neurosciences de la Timone                                                        | France                                         |
| Avalos, Gerardo         | Professor of Ecology                                    | University of Costa Rica                                                                             | Costa Rica                                     |
| Avarre, Jean-Christophe | Microbiologist                                          | Institut de Recherche pour le Développement                                                          | France                                         |
| Avella, Ignazio         | PhD Student                                             | University of Porto                                                                                  | Portugal                                       |
| Averbuj, Andres         | Researcher, PhD in Biology                              | CONICET                                                                                              | Argentina                                      |
| Avery-Gomm, Stephanie   | PhD student, conservation science                       | University of Queensland                                                                             | Australia                                      |
| Avila, Luciano Javier   | Principal Researcher CONICET and Director IPEEC=CONICET | IPEEC=CONICET                                                                                        | Argentina                                      |
| Ávila, Julia            | PhD Student                                             | National Institute of Amazonian Research                                                             | Brazil                                         |
| Ávila, Enrique          | Researcher in Marine Ecology                            | Instituto de Ciencias del Mar y Limnología, Universidad Nacional Autónoma de México                  | Mexico                                         |
| Ávila, Sérgio           | Principal Investigator / Marine (Palaeo)Biogeography    | CIBIO/InBIO, University of the Azores                                                                | Portugal                                       |
| AVILA GARCIA, DANIELA   | PHD CANDIDATE                                           | UNESCO CHAIR ON SUSTAINABILITY (UPC)                                                                 | Spain                                          |
| Avila-Calero, Sergio    | Evolutionary biology                                    | University of Muenster                                                                               | Germany                                        |
| Avila-Pires, Teresa     | Biologist                                               |                                                                                                      | Brazil                                         |
| Avila-Reese, Vladimir   | Full Professor, Astrophysics                            | Instituto de Astronomía, Universidad Nacional Autónoma de México                                     | Mexico                                         |
| Avila-Torres, Ignacio   | Adjunct Professor Comparative Anatomy of Vertebrates    | Universidad Nacional de Asuncion, Facultad de Ciencias Exactas y Naturales, Departamento de Biología | Paraguay                                       |
| Aviles, Amandine        | Biology                                                 |                                                                                                      | France                                         |
| Avilés, Jesús Miguel    | Researcher in Evolutionary Ecology                      | Functional and Evolutionary Ecology Department, Estación Experimental de Zonas Áridas (CSIC)         | Spain                                          |
| Avino, Fabio            | Plasma Physicist                                        |                                                                                                      | Switzerland                                    |
| Aviron, Stéphanie       | Ecologist                                               |                                                                                                      | France                                         |
| Avlijas, Suncica        | PhD Candidate - Freshwater Ecology                      | McGill University                                                                                    | Canada                                         |
| Avneon, Yoav            | PhD                                                     |                                                                                                      | Israel                                         |
| Avriel-Avni, Noa        | Researcher - Environmental education                    | Dead Sea and Arava Science Center                                                                    | Israel                                         |
| Avukatov, Vasko         | GIS analyst                                             | Macedonian Ecological Society                                                                        | Macedonia, Republic of (the former Yugoslavia) |
| Awoyemi, Stephen        | Doctoral Student/Environmental Sciences and Policy      | Central European University                                                                          | Nigeria                                        |
| Axelrad, Donald         | Associate Professor                                     | Florida A&M University                                                                               | United States of America (the)                 |
| Axworthy, Jeremy        | Graduate student, Aquatic and Fishery Sciences          | University of Washington                                                                             | United States of America (the)                 |
| Ayala, Pedro            | Assistant Research Professor of medicine                | Pontificia Universidad Católica de Chile                                                             | Chile                                          |

|                          |                                                                        |                                                                     |                                                            |
|--------------------------|------------------------------------------------------------------------|---------------------------------------------------------------------|------------------------------------------------------------|
| Ayala, Francisco         | Evolutionary Biologu                                                   |                                                                     | United States of America (the)                             |
| Ayala, Andrea            | PhD Candidate/College of Veterinary Medicine                           | University of Georgia                                               | United States of America (the)                             |
| Ayala Borda, Paola       | PhD student in Biology                                                 | University of Quebec n Chicoutimi                                   | Canada                                                     |
| Ayala-Orozco, Barbara    | Assistant Professor, Sustainability                                    | Institute for Ecosystem and Sustainability Research, UNAM           | Mexico                                                     |
| Ayalon, Ofira            | Prof.                                                                  | University of Haifa & Samuel Neamam Inst., Technion                 | Israel                                                     |
| Ayan, Gökçe              | Postdoctoral researcher in microbial evolutionary biology              | Max Planck Institute for Evolutionary Biology                       | Germany                                                    |
| Ayana, Rajagopal         | Bioinformatics                                                         | KU Leuven                                                           | Belgium                                                    |
| Aydurmus, Didem          | Environmental Politics                                                 |                                                                     | Germany                                                    |
| Ayesa, Javier Alejandro  | Researcher/Natural Resources Assessment                                | Instituto Nacional de Tecnología Agropecuaria                       | Argentina                                                  |
| Ayllón, Daniel           | Postdoc, Ecological modelling                                          | Complutense University of Madrid                                    | Spain                                                      |
| Aytuna, Aydin            | Mathematics                                                            | Middle East Technical University/ Sabancı University                | Turkey                                                     |
| Ayyub, Shreya            | Research Associate                                                     | Newcastle University                                                | United Kingdom of Great Britain and Northern Ireland (the) |
| Azam, Mohd Farooq        | Assistant Professor                                                    | Indian Institute of Technology Indore, India                        | India                                                      |
| Azamor, Luana            | Master in Biodiversity                                                 | Universidade do Estado do Rio de Janeiro (UERJ)                     | Brazil                                                     |
| Azcárate, Francisco M.   | Associate Professor, Ecology                                           | Universidad Autónoma de Madrid, Departamento de Ecología            | Spain                                                      |
| Azcárate Giménez, Carmen | Professor                                                              | Universitat Autònoma Barcelona                                      | Spain                                                      |
| AZCON-BIETO, JOAQUIN     | PLANT PHYSIOLOGY                                                       | UNIVERSITY OF BARCELONA                                             | Spain                                                      |
| Azemar, Frederic         | PhD - Engeneer in aquatic ecology                                      | University of Toulouse                                              | France                                                     |
| Aziz, Sheema             | President                                                              | Rimba                                                               | Malaysia                                                   |
| Azpiazu, Aurora          | Biologist retired                                                      |                                                                     | Spain                                                      |
| B, Peter                 | Postdoctoral Scholar                                                   | University of Kentucky                                              | United States of America (the)                             |
| B. Calegari, Bárbara     | Vertebrate systematics, Research Associate                             | PUCRS                                                               | Brazil                                                     |
| B.Moreira, Ana Paula     | Posdoc researcehr                                                      | UFRJ                                                                | Brazil                                                     |
| Baars, Jan               | Lecturer                                                               | University College Dublin                                           | Ireland                                                    |
| Babik, Wiesław           | Professor of Evolutionary Biology                                      | Jagiellonian University                                             | Poland                                                     |
| Babitsch, Denise         | PhD candidate (River ecosystem management)                             | Senckenberg Research Institute and Natural History Museum Frankfurt | Germany                                                    |
| Babuder, Mareike         |                                                                        | University of Canterbury                                            | New Zealand                                                |
| Babut, Marc              | ecotoxicologist (senior researcher)                                    | Irstea                                                              | France                                                     |
| Bacchetta, Carla         | Investigador Adjunto                                                   | Instituto Nacional de Limnología                                    | Argentina                                                  |
| Bachelet, Dominique      | Associate Professor, senior research / Climate Change Impacts Modeling | Oregon State University                                             | United States of America (the)                             |
| Bachledová, Stanislava   | Human medician, general practicion                                     | Private clinic, Garmedic s.r.o., Moyzesova 32, Košice               | Slovakia                                                   |
| Bachler, Herbert         | Leader, Institut of General Practice                                   | Medical University Innsbruck                                        | Austria                                                    |
| Bachman, Scott           |                                                                        | NCAR                                                                | United States of America (the)                             |
| Bachmann, Mona           | PHD Student                                                            | Max-Planck-Institiute for Evolutionary Anthropology                 | Germany                                                    |
| Bachmann, Michael        | Associate Professor                                                    | Michigan State University                                           | United States of America (the)                             |
| Bachoo, Santosh          | Senior Marine Ecologist                                                | Ezemvelo KwaZulu-Natal Wildlife                                     | South Africa                                               |

|                                 |                                                                             |                                                                      |                                                            |
|---------------------------------|-----------------------------------------------------------------------------|----------------------------------------------------------------------|------------------------------------------------------------|
| Backstrom, Ana                  | Landscape Ecologist                                                         | RMIT University                                                      | Australia                                                  |
| Badalova, Marina                | Head of microbiology department- Industrial biotechnologist                 | ROMB LTD                                                             | Bulgaria                                                   |
| Badeau, Vincent                 | research engineer / ecology                                                 | INRA                                                                 | France                                                     |
| Bader, Alexander                | PhD student in space physics                                                | Lancaster University                                                 | United Kingdom of Great Britain and Northern Ireland (the) |
| Badia, Rudy                     | Ecology Department                                                          | University of Southeast Norway                                       | Norway                                                     |
| Badur, Imke-Marie               | Project Manager Service Learning and Public Engagment in Higher Education   | University of Kassel                                                 | Germany                                                    |
| Bælum, Karoline                 | PhD Geology                                                                 | Svalbars Science Forum                                               | Norway                                                     |
| Baessler, Cornelia              | Scientific Manager Research Unit Ecosystems fo the Future                   | Helmholtz Centre for Environemental Research - UFZ                   | Germany                                                    |
| Baetscher, Kevin                | Ph.D. candidate                                                             | University of Hawaii                                                 | Switzerland                                                |
| Báez Martínez, Rosalina         | Investigador en Ciencias de la Administración                               | Universidad Anáhuac México y Universidad Nacional Autónoma de México | Mexico                                                     |
| Bafica, Andre                   | Associate Professor                                                         | Universidade Federal de Santa Catarina                               | Brazil                                                     |
| Bagarinao, Teodora              | marine biology, aquaculture                                                 | SEAFDEC Aquaculture Department (1978-2016)                           | Philippines (the)                                          |
| Baggio-Compagnucci, Andrea      | Research Assistant / Ecosystem Services                                     | The James Hutton Institute                                           | United Kingdom of Great Britain and Northern Ireland (the) |
| Bagley, Justin                  | Postdoctoral Research Fellow                                                | University of Missouri-St. Louis                                     | United States of America (the)                             |
| Baglinière, Jean-Luc            | Research Director Ecology of Aquatic Environments                           | French National Institute for Agricultural Research (INRA°           | France                                                     |
| Bagnasco, Marcello              | formerly Full Professor of Internal Medicine - now retired, free consultant | DiMI, University of Genoa                                            | Italy                                                      |
| BAGNERES-URBANY, Anne-Genevieve | Director of research                                                        | Centre National de la Recherche Scientifique (CNRS)                  | France                                                     |
| Bagnis, Arianna                 | Post-doctoral Research Fellow                                               | University of Bologna                                                | Italy                                                      |
| Baguette, Michel                | Professor                                                                   | Museum National d'Histoire Naturelle                                 | France                                                     |
| Bahamonde, Hector               | Plant eco phisiology                                                        |                                                                      | Argentina                                                  |
| Bahls, Peter                    | Executive Director/Fisheries Biologist                                      | Northwest Watershed Institute                                        | United States of America (the)                             |
| Baider, Claudia                 | Curator                                                                     | The Mauritius Herbarium                                              | Mauritius                                                  |
| Baier, Luisa                    | Biomedical Science                                                          | Reutlingen University                                                | Germany                                                    |
| Baier, Florian                  | Postdoctoral Researcher, Synthetic Biology                                  | University of Lausanne                                               | Switzerland                                                |
| Baig-Meininghaus, Tariq         | Complex Systems                                                             | Max Planck Insitute for Dynamics and Selforganization                | Germany                                                    |
| Bailey, Joseph                  | Geography Lecturer                                                          | York St John University                                              | United Kingdom of Great Britain and Northern Ireland (the) |
| Bailey, Liam                    | Post-doctoral Fellow, Climate Change Ecology                                | Institute of Zoo and Wildlife Research                               | Germany                                                    |
| Bailey, Dawn                    | Founder EcoSea Expeditions / Marine Biology                                 |                                                                      | United States of America (the)                             |
| Bailey, Zachary                 | Postgraduate Student of Evolutionary Biology                                | University of Edinburgh                                              | United Kingdom of Great Britain and Northern Ireland (the) |
| Bailleres, Henri                | Adjunct professor                                                           | QUT                                                                  | Australia                                                  |
| Baillie, Danny                  | Research Fellow, Physics                                                    | University of Otago                                                  | New Zealand                                                |

|                            |                                                           |                                                                   |                                                            |
|----------------------------|-----------------------------------------------------------|-------------------------------------------------------------------|------------------------------------------------------------|
| Baitz, Heather             | Registered psychologist (PhD)/clinical instructor         | University of British Columbia                                    | Canada                                                     |
| Baji Gal, Arpad            | PhD in Biology/biotechnology                              |                                                                   | Hungary                                                    |
| Bajolet, Flora             | Geologist                                                 | BRGM (French geological survey)                                   | France                                                     |
| Bajomi, Bálint             | PhD candidate, Conservation Biology                       | ELTE, Budapest                                                    | Hungary                                                    |
| Bajrami, Ani               | Researcher/ Anthropology                                  | University of Tirana                                              | Albania                                                    |
| Baker, Phillip             | Research Fellow                                           | Deakin University                                                 | Australia                                                  |
| Baker, Jessica             | Postdoctoral Research Fellow, Forest-climate interactions | University of Leeds                                               | United Kingdom of Great Britain and Northern Ireland (the) |
| Baker, William             | Head of Comparative Plant & Fungal Biology                | Royal Botanic Gardens, Kew                                        | United Kingdom of Great Britain and Northern Ireland (the) |
| Baker, David               | Postdoc / Ecology                                         | Monash University                                                 | Australia                                                  |
| Baker, Maria               | Senior Research Fellow                                    | University of Southampton                                         | United Kingdom of Great Britain and Northern Ireland (the) |
| Baker, Nathan Jay          | PhD candidate (Freshwater ecology)                        | Senckenberg Gesellschaft für Naturforschung                       | Germany                                                    |
| Baker, Eddie               | Division Director, Energy & Materials Processes           | Pacific Northwest National Laboratory (retired)                   | United States of America (the)                             |
| Baker Jr., MD, MS, Richard | Physician / Medicine                                      | St Marys Hospital, Madison, WI                                    | United States of America (the)                             |
| Bakker, Joke               | Theoretical Biology                                       | University of Groningen                                           | Netherlands (the)                                          |
| Bakker, Elisabeth          | Senior Scientist in Ecology                               | Netherlands Institute of Ecology (NIOO-KNAW)                      | Netherlands (the)                                          |
| Bakwo Fils, Eric Moise     | Senior Lecturer of Conservation Biology                   | Faculty of Sciences; University of Maroua                         | Cameroon                                                   |
| Balabanov, Ivaylo          | Ph.D. student in Immunology                               | Center for Molecular Biology "Severo Ochoa"                       | Spain                                                      |
| Balachandran, Aiyalam      | Joel Dorman Steele Emeritus Professor of Physics          | Syracuse University                                               | United States of America (the)                             |
| Balagurusamy, Nagamani     | Professor, Environmental Biotechnology                    | Facultad de Ciencias Biológicas, Universidad Autónoma de Coahuila | Mexico                                                     |
| Balart, Eduardo            | Senior researcher/marine ecology                          | Centro de Investigaciones Biológicas del Noroeste, S.C.           | Mexico                                                     |
| Balasubramanian, Muniyandi | Assistant Professor, Ecological Economics                 | Institute for Social and Economic Change                          | India                                                      |
| Balbontin, Javier          | Professor                                                 | University of Seville                                             | Spain                                                      |
| Baldasano, Jose M.         | Full Professor of Environmental Engineering.              | Technical University of Catalonia (UPC)                           | Spain                                                      |
| Baldassarre, Daniel        | Assistant Professor of Zoology                            | SUNY Oswego                                                       | United States of America (the)                             |
| Báldi, András              |                                                           | MTA Centre for Ecological Research                                | Hungary                                                    |
| Baldry, Kimberlee          | PhD Student                                               | IMAS, University of Tasmania                                      | Australia                                                  |
| Bales, Roger               | Professor                                                 | UC Merced                                                         | United States of America (the)                             |
| Bales, Chris               | Professor in Energy Technology                            | Dalarna University                                                | Sweden                                                     |
| BALESDENT, Jerome          | Directeur de recherche                                    | INRA                                                              | France                                                     |
| Balfour, Dave              | Ecologist                                                 | Independent                                                       | South Africa                                               |
| Balint, Miklos             | PI                                                        | Senckenberg Biodiversity and Climate Research Centre              | Germany                                                    |
| Ball, Olivier              | Lecturer in Ecology and Conservation                      | NorthTec                                                          | New Zealand                                                |
| Ball, Jude                 | PhD candidate, Public Health                              | University of Otago, Wellington                                   | New Zealand                                                |
| Ballantyne, Colin          | Emeritus Professor in Physical Geography                  | University of St Andrews                                          | United Kingdom of Great Britain and Northern Ireland (the) |
| Ballantyne, Gavin          | Lecturer in Ecology                                       | Edinburgh Napier University                                       | United Kingdom of Great Britain and Northern Ireland (the) |

|                               |                                                                        |                                                                                  |                                                            |
|-------------------------------|------------------------------------------------------------------------|----------------------------------------------------------------------------------|------------------------------------------------------------|
| Ballesteros, Manuel           | University Professor                                                   | Barcelona University                                                             | Spain                                                      |
| Balling, Meghan               | Marine Biologist                                                       | NOAA                                                                             | United States of America (the)                             |
| Ballot, Andreas               | Senior Scientist                                                       | Norwegian Institute for Water Research                                           | Norway                                                     |
| BALLOT, BARBARA               | Ingénieur agro-alimentaire                                             |                                                                                  | France                                                     |
| BALLOU, Rafik                 | Research Director - Physics                                            | Insitut Néel - CNRS                                                              | France                                                     |
| Balma, Giovanni A.C.          | Ichthyology                                                            | Museo Civico di Storia Naturale di Carmagnola                                    | Italy                                                      |
| Balmer, Jennifer              | Assistant Professor                                                    | The Citadel                                                                      | United States of America (the)                             |
| Balmonte, John Paul           | Aquatic Microbial Ecologist and Biogeochemist                          | Uppsala University                                                               | Sweden                                                     |
| Balogh, Lajos                 | head / botanist                                                        | Savaria Museum, Natural History Department                                       | Hungary                                                    |
| Balvino-Olvera, Francisco     | PhD Student                                                            | ENES UNAM-Morelia                                                                | Mexico                                                     |
| Balys, Vaidas                 |                                                                        | NGO "Baltijos vilkas"                                                            | Lithuania                                                  |
| Bamberg, Bob                  | Geology PhD researcher                                                 | University of Leicester                                                          | United Kingdom of Great Britain and Northern Ireland (the) |
| Bañares, Guillermo            | PhD candidate                                                          | Universidad Rey Juan Carlos                                                      | Spain                                                      |
| Banasik, Kazimierz            | Professor                                                              | Warsaw University of Life Sciences - SGGW, Institute of Environmetal Engineering | Poland                                                     |
| Banchs-Piqué, Miquel          | PhD student (civil engineering)                                        | University of Portsmouth                                                         | United Kingdom of Great Britain and Northern Ireland (the) |
| Bancila, Raluca Ioana         | Researcher                                                             | ISER                                                                             | Romania                                                    |
| Bandelj, Vinko                | Researcher                                                             | OGS - Istituto Nazionale di Oceanografia e di Geofisica Sperimentale             | Italy                                                      |
| Bandopadhyay, Subhajit        | PhD in Remote Sensing                                                  | Poznan University of Life Sciences                                               | Poland                                                     |
| Banham, Penny                 | Conservation Scientist                                                 | Born Free Foundation                                                             | United Kingdom of Great Britain and Northern Ireland (the) |
| Baniel, Alice                 | postdoctoral researcher in evolutionary biology                        | Stony Brook University                                                           | United States of America (the)                             |
| Bank, Michael                 | Senior Scientist                                                       | Institute of Marine Research                                                     | Norway                                                     |
| Banks, Andrew Clive           | Principal Research Scientist Earth Observation/ Satellite Oceanography | Institute of Oceanography, Hellenic Centre for Marine Research (HCMR)            | Greece                                                     |
| banlaki, imre                 | Researcher Synthetic Biology                                           | University of Lausanne                                                           | Switzerland                                                |
| Bannitz-Fernandes, Renata     | CRO                                                                    | BIOBREYER                                                                        | Brazil                                                     |
| Baños-Páez, Pedro             | Sociologist                                                            | University of Murcia                                                             | Spain                                                      |
| Bansept Basler, Pauline       | Plant breeder                                                          | Bayer Crop Science                                                               | France                                                     |
| Bañuelos, María-Jose          | Researcher (Post-Doc)                                                  | University of Oviedo                                                             | Spain                                                      |
| Banza, Paula                  | PhD Student                                                            | University of Évora                                                              | Portugal                                                   |
| bao, yanan                    | phd student                                                            | ocean university of china                                                        | China                                                      |
| BAQUE, DAVID                  | Ingeneer Geochemistry Heavy metals in environment                      | CNRS ECOLAB                                                                      | France                                                     |
| Baquero Larriva, María Teresa | PhD student in Urban Regeneration and Sustainability                   | Polytechnic University of Madrid                                                 | Spain                                                      |
| Bar Yosef, Anne               | Specialist Critical Care Medicine                                      | Charité Universitätsklinikum Berlin                                              | Germany                                                    |
| Baragatti, Meili              | Statistics                                                             | Montpellier SupAgro                                                              | France                                                     |
| Barák, Imrich                 | Head of Department of Microbial Genetics                               | Institute of Molecular Biology, Slovak Academy of Sciences                       | Slovakia                                                   |
| baraldi, cecilia              | PhD                                                                    | university of modena                                                             | Italy                                                      |

|                          |                                                                  |                                                                                                  |                                                            |
|--------------------------|------------------------------------------------------------------|--------------------------------------------------------------------------------------------------|------------------------------------------------------------|
| Baran, Brygida           | Mgr/Phd student                                                  | Centre of New Technologies University of Warsaw                                                  | Poland                                                     |
| Barantal, Sandra         | Postdoctoral researcher (Plant-Soil Ecology)                     | CNRS                                                                                             | France                                                     |
| Barata, Carolina         | PhD Student in Biology                                           | University of St Andrews                                                                         | United Kingdom of Great Britain and Northern Ireland (the) |
| Baratta, Philippe        | PhD student                                                      | CPPM - CPT - CNRS - Aix-Marseille université                                                     | France                                                     |
| Barausse, Alberto        | Researcher                                                       | University of Padova                                                                             | Italy                                                      |
| Barbarics, Boris         | Medicine                                                         | University Medicine Goettingen                                                                   | Germany                                                    |
| Barbe, Lou               | Assistant Professor in Ecology                                   | University of Rennes 1                                                                           | France                                                     |
| Barber, Patrick          | Assistant Professor of Chemistry                                 | Earlham College                                                                                  | United States of America (the)                             |
| Barber-James, Helen      | Freshwater Biologist                                             | Albany Museum                                                                                    | South Africa                                               |
| Barberi, Paolo           | Professor in Agronomy and Field Crops                            | Group of Agroecology, Institute of Life Sciences, Scuola Superiore Sant'Anna                     | Italy                                                      |
| Barberis, Marta          | PhD Student                                                      | Università di Bologna                                                                            | Italy                                                      |
| Barbero, Albane          | PhD Student                                                      | Institut of Geosciences of the Environnement - CNRS - UGA                                        | France                                                     |
| Barbero palacios, Laura  | Conservationist biologist                                        | Universitat Autònoma de Barcelona                                                                | Spain                                                      |
| Barbezat, Gil            | Emeritus Professor of Medicine, Gastroenterologist               | University of Otago                                                                              | New Zealand                                                |
| Barbier, Samuel          | Ph.D. Geology                                                    | University Lyon 1 Claude Bernard                                                                 | France                                                     |
| BARBIER, İçvara          | phd student in synthetic biology                                 | University of Lausanne                                                                           | Switzerland                                                |
| BARBIERO, Laurent        | Soil Scientist                                                   | IRD                                                                                              | France                                                     |
| Barbini, Santiago        | Research, Dr - Biology and conservation of chondrichthyan fishes | Instituto de Investigaciones Marinas y Costeras (IIMyC, CONICET-UNMdP), Mar del Plata, Argentina | Argentina                                                  |
| Barbosa, A. Márcia       |                                                                  | Biogeography Consulting & Training                                                               | Portugal                                                   |
| Barbosa, Catia F         | Professor of Geochemistry                                        | Universidade Federal Fluminense (UFF)                                                            | Brazil                                                     |
| BARBOSA, ANDRES          | SENIOR SCIENTIST                                                 | MUSEO NACIONAL DE CIENCIAS NATURALES                                                             | Spain                                                      |
| Barbosa Fontana, Rodrigo | PhD student in Ecology                                           | Universidade Federal do Rio Grande do Sul                                                        | Brazil                                                     |
| Barbraud, Christophe     | Researcher, population ecology                                   | CNRS                                                                                             | France                                                     |
| Barcellos, Christovam    | Senior researcher                                                | Oswaldo Cruz Foundation                                                                          | Brazil                                                     |
| Barcelo-Serra, Margarida | Postdoctoral Researcher in behavioral ecology                    | IMEDEA                                                                                           | Spain                                                      |
| Barcelos, Daniele        | MSc Ecology                                                      | Instituto de Desenvolvimento Sustentável Mamirauá                                                | Brazil                                                     |
| Barclay, Robert          | Professor                                                        | University of Calgary                                                                            | Canada                                                     |
| Barenton, Bruno          | Scientist, retired                                               | INRA                                                                                             | France                                                     |
| Barfod, Anders           | Professor                                                        | Aarhus University                                                                                | Denmark                                                    |
| Barga, Sarah             | Plant Ecologist                                                  |                                                                                                  | United States of America (the)                             |
| Bargagli, Roberto        | Professor of Ecology                                             | University of Siena                                                                              | Italy                                                      |
| Bargaje, Rhishikesh      | Scientist                                                        |                                                                                                  | United States of America (the)                             |
| Bargheer, Till           |                                                                  | Hannover University                                                                              | Germany                                                    |
| Bargielowski, Irka       | Research scientist, mosquito ecology and genomics                | UC Davis                                                                                         | United States of America (the)                             |
| Barkan, N.Pinar          | Postdoctoral fellow                                              | University of Lausanne                                                                           | Switzerland                                                |
| Barker, Brent            | Teaching Support Manager, Astronomy and Geoscience               | University of Chicago                                                                            | United States of America (the)                             |
| Barker, Fiona            | Research Fellow                                                  | Monash University                                                                                | Australia                                                  |

|                               |                                                             |                                                                         |                                                            |
|-------------------------------|-------------------------------------------------------------|-------------------------------------------------------------------------|------------------------------------------------------------|
| Barker, James Stuart          | Emeritus Professor                                          | University of New England                                               | Australia                                                  |
| Barki, Assaf                  |                                                             | Department of Aquaculture, Volcani Institute                            | Israel                                                     |
| Barlow, Craig                 | Engineer                                                    |                                                                         | Finland                                                    |
| Barmark, Mimmi                | Associate professor in Sociology                            | Lund University                                                         | Sweden                                                     |
| Barnard, Malcolm              | PhD Student, Marine Sciences                                | University of North Carolina - Chapel Hill Institute of Marine Sciences | United States of America (the)                             |
| Barnes, Andrew                | Marine microbiology/immunology                              | The University of Queensland                                            | Australia                                                  |
| Barnett, Leonie               | Lecturer (Biology)                                          | Central Queensland University                                           | Australia                                                  |
| Baró, Francesc                | Postdoctoral researcher                                     | ICTA-UAB                                                                | Spain                                                      |
| Barocas, Adi                  | Postdoctoral Associate                                      | San Diego Zoo's Institute for conservation Research                     | United States of America (the)                             |
| Baron, Alexandre              | PhD Student in Atmospheric Physics                          | LSCE-IPSL                                                               | France                                                     |
| Baron, Harald                 | Researcher, Institute of Spatial Planning                   | Vienna University of Technology                                         | Austria                                                    |
| Baronio, Gudryan Jackson      | Post-doc researchers                                        | Universidade Federal dos Vales do Jequitinhonha e Mucuri                | Brazil                                                     |
| Barot, Sébastien              | Ecology                                                     | IRD                                                                     | France                                                     |
| Barouillet, Cecilia           | PhD Candidate Biology                                       | Queen's University                                                      | Canada                                                     |
| Barquez, Ruben                | Professor                                                   | University of Tucuman                                                   | Argentina                                                  |
| Barr, Genevieve               | PhD student - Retrovirology                                 |                                                                         | United Kingdom of Great Britain and Northern Ireland (the) |
| Barradas, Victor              | Senior Researcher/Ecology and Environmental Sciences        | Instituto de Ecologia, Universidad Nacional Autonoma de Mexico          | Mexico                                                     |
| Barrado Navascues, David      | Full Professor Astrophysics                                 | Instituto Nacional de Técnica Aeroespacial                              | Spain                                                      |
| Barras, Hélène                | PhD Student                                                 | University of Bern                                                      | Switzerland                                                |
| Barrat, Jean-Alix             | Professor of Geochemistry                                   | Institut Universitaire Européen de la Mer (IUEM), Plouzané              | France                                                     |
| Barratt, Chris                | Postdoctoral Researcher                                     | German Centre for Integrative Biodiversity Research Halle-Jena-Leipzig  | Germany                                                    |
| Barratt, Barbara              | Principal Scientist                                         | AgResearch Ltd                                                          | New Zealand                                                |
| Barrena de los Santos, Carmen | Postdoctoral researcher                                     | Centre of Marine Sciences of Algarve                                    | Portugal                                                   |
| Barrera, Alessandra           | Associate Professor of Biology                              | Georgia Gwinnett College                                                | United States of America (the)                             |
| Barrera-Alba, Jose Juan       | Full Professor                                              | Institute of Marine Science - Universidade Federal de São Paulo         | Brazil                                                     |
| Barrett, Rowan                | Associate Professor                                         | McGill University                                                       | Canada                                                     |
| Barrett, Spencer              | University Professor Emeritus                               | University of Toronto                                                   | Canada                                                     |
| Barrett, Eamonn               | Director; Environmental and Sustainability Consultant       | EB International Consulting Limited                                     | United Kingdom of Great Britain and Northern Ireland (the) |
| Barrett, Peter                | Emeritus Professor of Geology                               | Victoria University of Wellington                                       | New Zealand                                                |
| Barrett, Louise               | Canada Research Chair in Cognition, Evolution and Behaviour | University of Lethbridge                                                | Canada                                                     |
| Barrett, David                | Research Associate                                          | University of Calgary                                                   | Canada                                                     |
| Barrett, Paul                 | Researcher                                                  | Natural History Museum                                                  | United Kingdom of Great Britain and Northern Ireland (the) |

|                            |                                                          |                                                                             |                                                            |
|----------------------------|----------------------------------------------------------|-----------------------------------------------------------------------------|------------------------------------------------------------|
| Barriga, Alejandro         | Postdoctoral researcher in Biochemistry                  | Complutense University of Madrid                                            | Spain                                                      |
| Barriga Bahamonde, Cecilia | PhD candidate, Environmental Science and Policy          | George Mason University                                                     | Peru                                                       |
| Barrios, Sara              | Conservation Partnership Coordinator                     | Royal Botanic Gardens Kew                                                   | United Kingdom of Great Britain and Northern Ireland (the) |
| Barron, Douglas            | Assistant Professor of Biology                           | Arkansas Tech University                                                    | United States of America (the)                             |
| Barros, Piedade            | Professor/ researcher                                    | School of Health Porto Polytechnic                                          | Portugal                                                   |
| Barros, Nathan             | professor                                                | Federal University of Juiz de Fora                                          | Brazil                                                     |
| Barroso Ramos Neto, Mario  | LULUC Monitoring Specialist                              | TNC                                                                         | Brazil                                                     |
| Barry, David               |                                                          | Francis Crick Institute                                                     | United Kingdom of Great Britain and Northern Ireland (the) |
| Barry, Michael             | Associate Scientist, Department of Neuroscience          | Ichan School of Medicine at Mount Sinai                                     | United States of America (the)                             |
| Barry, John                | Professor of Green Political Economy                     | Queen's University Belfast                                                  | United Kingdom of Great Britain and Northern Ireland (the) |
| Barry, Paul                | Lecturer, Computing and Data Science                     | Institute of Technology, Carlow                                             | Ireland                                                    |
| Barshis, Daniel            | PhD Zoology                                              | Old Dominion University                                                     | United States of America (the)                             |
| Barsoum, Mark              | Asst. Professor, Biology                                 | Davidson College                                                            | United States of America (the)                             |
| Bart, Sylvain              | Postdoctoral Research Associate                          | University of York                                                          | United Kingdom of Great Britain and Northern Ireland (the) |
| Bartelt, Paul              | Professor of Biology                                     | Waldorf University                                                          | United States of America (the)                             |
| Bartha, Sandor             | Senior Scientist, ecologist                              | MTA Centre for Ecological Research                                          | Hungary                                                    |
| Barthe, Franck             | Professor of Mathematics                                 | Université Toulouse III                                                     | France                                                     |
| Barthel, Leon              | Scientist in Ecology                                     |                                                                             | Germany                                                    |
| Barthel, Stephan           | Senior Lecturer                                          | University of Gävle                                                         | Sweden                                                     |
| Barthelemy, Frederic       | Neurosciences                                            | Forschungszentrum Jülich                                                    | France                                                     |
| Bartholomew, Jerri         | Professor of Microbiology                                | Oregon State University                                                     | United States of America (the)                             |
| Bartlett, Randal           | Interagency Coordinator, Hawaii Invasive Species Council | Research Corporation of the University of Hawaii                            | United States of America (the)                             |
| Bartlett, Madelaine        | Assistant Professor, Biology                             | University of Massachusetts Amherst                                         | United States of America (the)                             |
| Bartomeus, Ignasi          | Researcher                                               | EBD-CSIC                                                                    | Spain                                                      |
| Barton, Andrew             | Professor of Biology                                     | University of Maine at Farmington                                           | United States of America (the)                             |
| Barton, Nicholas           | Professor, evolutionary genetics                         | IST Austria                                                                 | Austria                                                    |
| Barton, Brandon            | Assistant professor                                      | Mississippi State University                                                | United States of America (the)                             |
| Bartoń, Kamil              | Assistant professor, ecology                             | Institute of Nature Conservation, Polish Academy of Sciences                | Poland                                                     |
| Bartram, Deborah           | Environmental Engineer                                   |                                                                             | United States of America (the)                             |
| Baruzzi, Agostino          | Full Professor of Neurology                              | Alma Mater Studiorum-Bologna University                                     | Italy                                                      |
| Barzanti, Paola            | Statistician                                             | Istituto Zooprofilattico Sperimentale del Piemonte, Liguria e Valle d'Aosta | Italy                                                      |
| Bas, Maria                 | PhD Student in Biological Sciences                       | Centro Austral de Investigaciones Científicas (CADIC-CONICET)               | Argentina                                                  |
| Bas, Yves                  | Researcher                                               | CESCO - MNHN                                                                | France                                                     |
| Basaguren, Ana             | Lecturer of Ecology                                      | University of the Basque Country UPV/EHU                                    | Spain                                                      |

|                       |                                                                  |                                                                            |                                                            |
|-----------------------|------------------------------------------------------------------|----------------------------------------------------------------------------|------------------------------------------------------------|
| Basei, Fernanda Luisa | Postdoc                                                          | UNICAMP                                                                    | Brazil                                                     |
| Basellini, Ugofilippo | PhD student, demography                                          | Institut national d' études démographiques (INED)                          | France                                                     |
| Baskett, Carina       | Postdoctoral Researcher, Ecology and Evolutionary Biology        | Institute of Science and Technology-Austria                                | Austria                                                    |
| Baskin, Tobias        | Professor of Biology                                             | University of Massachusetts Amherst                                        | United States of America (the)                             |
| Bass, Sarah           | Lecturer                                                         | University of Plymouth                                                     | United Kingdom of Great Britain and Northern Ireland (the) |
| Bassaglia, Yann       | MCF cell biology                                                 | MNHN                                                                       | France                                                     |
| Bassat, Quique        | ICREA Research Professor                                         | Barcelona Institute for Global Health (ISGlobal)                           | Spain                                                      |
| Basse, Alexander      |                                                                  | University of Kassel                                                       | Germany                                                    |
| Bassham, Susan        | Academic scientist in biology                                    | University of Oregon                                                       | United States of America (the)                             |
| Bassiouni, Maoya      | PhD Student, Water Resources Engineering                         | Oregon State University                                                    | United States of America (the)                             |
| Basso, Néstor         | Researcher, Director                                             | IDEAUS-CONICET                                                             | Argentina                                                  |
| Basso, Veronica       | PhD student in Agricultural Sciences                             | INRA Grand-Est Nancy                                                       | France                                                     |
| Bassos-Hull, Kim      | Senior Biologist/Marine Biology                                  | Mote Marine Laboratory                                                     | United States of America (the)                             |
| Bastazini, Vinicius   | Ecology                                                          |                                                                            | France                                                     |
| Bastian, Frederic     | Computational biology                                            | SIB Swiss Institute of Bioinformatics                                      | Switzerland                                                |
| Bastian, Anna         | Evolutionar Biologists                                           | University of KwaZaule-Natal                                               | South Africa                                               |
| BASTIAN, Suzanne      | Associate Professor Ecology and Infectious Diseases              | Oniris/INRA                                                                | France                                                     |
| Bastin, Jean Francois | Ecologist                                                        | ETH-Zurich                                                                 | Switzerland                                                |
| Bastos, Ana           | Scientific Researcher                                            | Dept. of Geography, Ludwig-Maximilians University                          | Germany                                                    |
| Bataille, Gwennaël    | Evolutionary ecology                                             | UCLouvain                                                                  | Belgium                                                    |
| Batary, Peter         | Head of Landscape and Conservation Ecology Group                 | MTA Centre for Ecological Research                                         | Hungary                                                    |
| Batavia, Chelsea      | Post-doctoral researcher                                         | Oregon State University                                                    | United States of America (the)                             |
| Batelaan, Okke        | Professor Hydro(geo)logy                                         | Flinders University, Adelaide                                              | Australia                                                  |
| Bateman, Craig        | Postdoctoral researcher in Forest Entomology                     | University of Florida                                                      | United States of America (the)                             |
| Bateman, Brooke       | Senior Scientist, Climate; Climate Ecologist                     | National Audubon Society                                                   | United States of America (the)                             |
| Batenburg, Anneke     | postdoc in atmospheric chemistry                                 | MPI-C Mainz                                                                | Germany                                                    |
| Bates, Amanda         | Associate Professor                                              | Memorial University                                                        | Canada                                                     |
| Bates, Margaret       | Professor of Sustainable Wastes Management                       | The University of Northampton                                              | United Kingdom of Great Britain and Northern Ireland (the) |
| Bateson, Mathilde     | Phd Candidate in Artificial Intelligence                         | ecole de technologie supérieure, montreal                                  | Canada                                                     |
| Batil, Tobias         | Bioinformatics                                                   | University of Exeter                                                       | United Kingdom of Great Britain and Northern Ireland (the) |
| Batista, Silara       | PhD candidate                                                    | Universidade estadual "Júlio de Mesquita Filho"-UNESP                      | Brazil                                                     |
| Batjes, Niels H.      | Senior Soil Scientist / Co-ordinator World Data Centre for Soils | ISRIC - World Soil Information                                             | Netherlands (the)                                          |
| Battillo, Jenna       | Palynologist/Archaeobotanist                                     | PaleoResearch Institute                                                    | United States of America (the)                             |
| Batzdorf, Clara       | medical PhD-student                                              | Institute for medical Immunology at the Charité Universitätsmedizin Berlin | Germany                                                    |
| Bauch, Christina      | Postdoctoral researcher / Evolutionary Biology                   | University of Groningen                                                    | Netherlands (the)                                          |

|                         |                                                                |                                                                                       |                                                            |
|-------------------------|----------------------------------------------------------------|---------------------------------------------------------------------------------------|------------------------------------------------------------|
| Bauch, Simone           | Consultant on climate change and land use                      |                                                                                       | Brazil                                                     |
| Baudement, Cécile       | Hydrogeologist                                                 | Geological French Survey                                                              | France                                                     |
| Baudin, Emmanuel        | Assistant professor                                            | Ecole Normale Supérieure                                                              | France                                                     |
| Baudin, Mael            | Postdoc - Plant Biology                                        | UC Berkeley                                                                           | United States of America (the)                             |
| Baudoin, Michael        | Professor in physics                                           | Université de Lille                                                                   | France                                                     |
| Baudouin, Anne          | research ingeneer, chemistry                                   | CNRS                                                                                  | France                                                     |
| Baudraz, Maude          | PhD candidate, Zoology                                         | Trinity College Dublin                                                                | Ireland                                                    |
| Baudrier, Jérôme        | Marine Environment                                             | Ifremer                                                                               | France                                                     |
| Baudry, Jacques         | senior scientist in landscape ecology                          | National Institute for Agronomic Research                                             | France                                                     |
| Baudry, Emmanuelle      | Professor in ecology                                           | University Paris Sud                                                                  | France                                                     |
| Baudson, Tanja Gabriele | Postdoctoral Researcher                                        | University of Luxembourg                                                              | Luxembourg                                                 |
| Bauer, Hans             | Wildlife Conservation Scientist                                | University of Oxford                                                                  | Netherlands (the)                                          |
| Bauer, Franz            | Renewable Energies                                             | OTH Regensburg                                                                        | Germany                                                    |
| Bauer, Hanna            | Graduate Student                                               | Louisiana State University                                                            | United States of America (the)                             |
| Bauer, Manfred          | Head of Customer Service Tyrol and Vorarlberg                  | ZAMG - Zentralanstalt fuer Meteorologie und Geodynamik                                | Austria                                                    |
| Bauer, Eugen            | Postdoctoral Researcher                                        | Institute of Organismic and Molecular Evolution, University of Mainz                  | Germany                                                    |
| Bauer, Yannik           | PhD candidate, Computational Vision Neuroscience               | Ludwig-Maximilians-University (LMU) Munich                                            | Germany                                                    |
| Bauhus, Jürgen          | Profesor of Silviculture                                       | University of Freiburg                                                                | Germany                                                    |
| Baum, Michael           | postdoc in science teacher education                           | Christian-Albrechts-Universität Kiel                                                  | Germany                                                    |
| Baumann, Matthias       | Researcher                                                     | Humboldt-Universität zu Berlin                                                        | Germany                                                    |
| Baumann, Nathalie       | Urban Ecologist, Senior Lecturer and Consultant                | Zurich University of Applied sciences, Institute of environment and natural resources | Switzerland                                                |
| Baumann, Franz          | Visiting Research Professor                                    | New York University                                                                   | United States of America (the)                             |
| Baumann, Sabine         | Cryosphere                                                     |                                                                                       | Germany                                                    |
| Baumbach, Dustin        | PhD Candidate in Biology                                       | Loma Linda University                                                                 | United States of America (the)                             |
| Baumeister, Stefan      | Post-Doctoral Researcher in Corporate Environmental Management | University of Jyväskylä, School of Business and Economics                             | Finland                                                    |
| Baumel, Alex            | lecturer and researcher in plant ecology and evolution         | Aix Marseille University                                                              | France                                                     |
| Baumgarten, Simon       | Wissenschaftlicher Mitarbeiter                                 | Fraunhofer-Gesellschaft                                                               | Germany                                                    |
| Baumgartner, Amato      | Sustainability Economist                                       |                                                                                       | Germany                                                    |
| Baur, Julian            | PhD candidate, Evolutionary biology                            | University of Uppsala                                                                 | Sweden                                                     |
| BAURAIN, Denis          | Associate Professor / Bioinformatics and Phylogenomics         | University of Liège                                                                   | Belgium                                                    |
| Bautista, Carlos        | Research assistant                                             | Institute of Nature Conservation of the Polish Academy of Science (PAN)               | Poland                                                     |
| Bax, Narissa            | Marine scientist                                               | Tasmanian Museum and Art Gallery                                                      | Australia                                                  |
| Bax, Gerhard            | Prof.Dr. Earth Science & ICT4D                                 | Inter-University Council for East Africa                                              | Uganda                                                     |
| Baxter, Sandra          | Engagement Fellow                                              | UKFIET                                                                                | United Kingdom of Great Britain and Northern Ireland (the) |
| Baxter, Colden          | Professor of Freshwater Ecology                                | Idaho State University                                                                | United States of America (the)                             |

|                                  |                                                                   |                                           |                                                            |
|----------------------------------|-------------------------------------------------------------------|-------------------------------------------|------------------------------------------------------------|
| Bayal, Nitin                     | Senior Research Fellow, DBT                                       | National Centre for Cell Science, Pune    | India                                                      |
| Bayala, Jules                    | Principal Scientist - Sahel Ecosystems                            | World Agroforestry                        | Mali                                                       |
| Bayet, Laurie                    | Assistant Professor                                               | American University                       | United States of America (the)                             |
| Baylis, Matthew                  | Professor of Veterinary Epidemiology                              | University of Liverpool                   | United Kingdom of Great Britain and Northern Ireland (the) |
| Bayly, Nick                      | Migratory Species Manager                                         | SELVA                                     | Colombia                                                   |
| Bayraktarov, Elisa               | Postdoctoral Research Fellow, Conservation Biology                |                                           | Australia                                                  |
| Bazan, Soledad                   | Professional Assistant in biophysics                              | CONICET                                   | Argentina                                                  |
| Bazié, Hugues Roméo              | lecturer-researcher in agroforestry and plant Ecophysiology       | University of Ouagadougou                 | Burkina Faso                                               |
| Bazin, Jeremie                   | Biology researcher                                                | CNRS                                      | France                                                     |
| Beadle, Luann                    | Senior Environmental Scientist                                    | Private Consultant                        | United States of America (the)                             |
| Beadle, Nicole                   | Wildlife biologist                                                | Consultant                                | United States of America (the)                             |
| Beadle, Douglas                  | Principal Environmental Scientist - Retired                       | Consulting                                | United States of America (the)                             |
| Beakes, Kerry                    | Lecturer / public health nutrition                                | Endeavour College of Natural Health       | Australia                                                  |
| Bean, Nina                       | Master's student in physiological ecology of tropical reef corals | California State University, Northridge   | United States of America (the)                             |
| Bearzi, Maddalena                | President                                                         | Ocean Conservation Society                | United States of America (the)                             |
| Bearzi, Giovanni                 | President                                                         | Dolphin Biology and Conservation          | Italy                                                      |
| Beattie, Andrew                  | Emeritus Professor                                                | Macquarie University                      | Australia                                                  |
| Beaud, Flavien                   | Postdoctoral fellow, in glaciology and glacial geomorphology      | California Institute of Technology        | United States of America (the)                             |
| Beaufore, Lucas                  | Physics Graduate Student                                          | University of Chicago                     | United States of America (the)                             |
| Beaufort, Luc                    | Senior Scientist, in Paleoceanography and Oceanography            | CNRS                                      | France                                                     |
| Beauge, Cristian                 | Full Professor                                                    | Univseridad Nacional de Cordoba           | Argentina                                                  |
| Beaune, David                    | Biologist.                                                        | Université de Bourgogne Franche Comté     | France                                                     |
| Beaunée, Gael                    | Researcher in epidemiology, PhD                                   | INRA                                      | France                                                     |
| Beauregard, Pascale              | Associate Professor, Microbiology                                 | Université de Sherbrooke                  | Canada                                                     |
| Beaurepaire, Alexis              | postdoc                                                           | University of Bern                        | Switzerland                                                |
| Beauvais, Simon-Gabriel          | Astronomy                                                         | Université de Montréal                    | Canada                                                     |
| Beaver, Katy                     | Biology                                                           |                                           | Seychelles                                                 |
| Beazley, Karen                   | Professor                                                         | Dalhousie University                      | Canada                                                     |
| Bebas, Piotr                     | Professor/Biology                                                 | University of Warsaw                      | Poland                                                     |
| Bebbington, Kat                  | Postdoctoral researcher/evolutionary ecology                      | The University of Groningen               | Netherlands (the)                                          |
| Bebej, Ryan                      | Associate Professor of Biology                                    | Calvin University                         | United States of America (the)                             |
| Beccaloni, George                | Entomologist/evolutionary biologist/historian of science          | The Charles Darwin Trust                  | United Kingdom of Great Britain and Northern Ireland (the) |
| Becciu, Paolo                    | PhD student                                                       | University of Haifa                       | Israel                                                     |
| Becerra, Alejandra G.            | Researcher-Professor-Mycologist                                   | IMBIV-UNC                                 | Argentina                                                  |
| BECERRA, Sylvia                  | Researcher -Sociologist                                           | CNRS                                      | France                                                     |
| Becerra Rondón, Adriana Coromoto | PhD Student in Remote Sensing                                     | Universidade Federal do Rio Grande do Sul | Venezuela (Bolivarian Republic of)                         |

|                           |                                                                |                                                                      |                                                            |
|---------------------------|----------------------------------------------------------------|----------------------------------------------------------------------|------------------------------------------------------------|
| Bechara, Fernando         | Professor, Tropical Forest Restoration                         | Federal University of Technology - Paraná                            | Brazil                                                     |
| Bechtel, Timothy          | Professor of Geoscience                                        | Franklin & Marshall College                                          | United States of America (the)                             |
| Beck, Kathryn             | Botanist                                                       |                                                                      | United States of America (the)                             |
| becker, yannick           | Neuroscience                                                   |                                                                      | France                                                     |
| Becker, Florian           | MSc and PhD candidate in Meteorology                           | Karlsruhe Institute of Technology                                    | Germany                                                    |
| Becker, Francois          | Chief Curator, Natural History                                 | National Museum of Namibia                                           | Namibia                                                    |
| Becker, Christian         | Chemist                                                        | Freie Universität Berlin                                             | Germany                                                    |
| Becker, Fernando          | Professor Associado. Department of Ecology                     | Universidade Federal do Rio Grande do Sul                            | Brazil                                                     |
| Becker, Fernando Gertum   | Professor Associado. Department of Ecology                     | Universidade Federal do Rio Grande do Sul                            | Brazil                                                     |
| Becker, Dr. Konstantin    | Scientist and teacher in agriculture                           | Justus-Liebig-Universität Giessen                                    | Germany                                                    |
| Becker, Julie             | Associate Professor, Environmental Health                      |                                                                      | United States of America (the)                             |
| Beckett, Brenden          | Ecologist focusing on the effect of deforestation on spiders.  | Edge Hill University                                                 | United Kingdom of Great Britain and Northern Ireland (the) |
| Beckett, Stephen          | Research Scientist, School of Biological Sciences              | Georgia Institute of Technology                                      | United States of America (the)                             |
| BECKING, Thomas           | Postdoctoral position                                          | CNRS - French National Center for Scientific Research                | France                                                     |
| Beckman, Noelle           | Assistant Professor, Ecology                                   | Utah State University                                                | United States of America (the)                             |
| Beckett, Margot           | Associate Professor of Biology                                 | Colorado Mesa University                                             | United States of America (the)                             |
| Beckwith, Robaire         | Research Scientist                                             | Cambridge Univ                                                       | United Kingdom of Great Britain and Northern Ireland (the) |
| Becquet, Valentine        | Researcher in Demography                                       | French Institute for Demographic Studies (Ined)                      | France                                                     |
| bedhomme, stephanie       | Researcher in Evolutionary Biology                             | CNRS                                                                 | France                                                     |
| Bednar, Lubomir           | Doctoral researcher                                            | Humboldt Univeristy Berlin                                           | Germany                                                    |
| Bednarska, Agnieszka      | Assistant Professor                                            | Jagiellonian University, Institute of Environmental Sciences         | Poland                                                     |
| Bednarz, James            | Senior Lecturer/Conservation Biology                           | University of North Texas                                            | United States of America (the)                             |
| Bedoya, Ricardo           | Forester                                                       | –                                                                    | Costa Rica                                                 |
| Bee, Kate                 | Primateology                                                   |                                                                      | United Kingdom of Great Britain and Northern Ireland (the) |
| Beebe, Alfred             | Mathematics                                                    | Salisbury University                                                 | United States of America (the)                             |
| Beege, Maik               | Post-Doctoral Researcher / Media- and Instructional Psychology | Chemnitz University of Technology                                    | Germany                                                    |
| Beer, Amy-Jane            | Biologist and writer                                           |                                                                      | United Kingdom of Great Britain and Northern Ireland (the) |
| Begay, PhD, MPH, Tommy K. | Clinical Assistant Professor                                   | Department of Psychiatry, College of Medicine, University of Arizona | United States of America (the)                             |
| Begeman, Lineke           | Phd student; veterinary medicine                               | Erasmus medical centre                                               | Netherlands (the)                                          |
| Beggs, Jacqueline         | Professor in Ecology                                           | University of Auckland                                               | New Zealand                                                |
| Bégin, Paschale Noël      | PhD student in aquatic ecology                                 | Université Laval                                                     | Canada                                                     |
| Begoña, Gartzia de Bikuña | Director técnico                                               | Anbiotek Biotechnologies                                             | Spain                                                      |
| Begossi, Alpina           | Researcher in Fisheries and Food                               | State University of Campinas                                         | Brazil                                                     |
| Begovac, Paul C.          | Biologist                                                      | Retired - W. L. Gore & Associates                                    | United States of America (the)                             |
| Begue, laurent            | Full professor                                                 | University Grenoble Alpes                                            | France                                                     |

|                              |                                                                                     |                                                               |                                                            |
|------------------------------|-------------------------------------------------------------------------------------|---------------------------------------------------------------|------------------------------------------------------------|
| Beh, Chee Yang               | Physics & Engineering / Investment                                                  |                                                               | Singapore                                                  |
| behaghel, thibault           | Research Engineer                                                                   | Laboratory of Astrophysics of Marseille                       | France                                                     |
| beher, jutta                 | phd candidate                                                                       | university of melbourne                                       | Australia                                                  |
| Behmene, Ibrahim el Khalil   | Aquaculture                                                                         | University of mostaganem Algérie                              | Algeria                                                    |
| Behra, Philippe              | Professor - Environment chemistry                                                   | Institut National Polytechnique de Toulouse                   | France                                                     |
| Beier, Christian             |                                                                                     | PUCRS - Pontificia Universidade Católica do Rio Grande do Sul | Brazil                                                     |
| Beigbeder, Joana             | Researcher                                                                          | IMT mines Ales                                                | France                                                     |
| Beikert, Günther             | PhD in physics, teaching in professional education                                  | Land Baden-Württemberg                                        | Germany                                                    |
| Beirne, Christopher          | Postdoctoral Researcher                                                             | University of British Columbia                                | Canada                                                     |
| Beiroz, Wallace              | Lecturer - Environmental management and Restoration of Degraded Areas               | Universidade Federal do Sul e Sudeste do Pará                 | Brazil                                                     |
| Beisiegel, Beatriz           | Environmental analyst                                                               | Instituto Chico Mendes de Conservação da Biodiversidade       | Brazil                                                     |
| Beisner, Beatrix             | Professor, Biological Sciences (Aquatic Ecology)                                    | University of Quebec at Montreal                              | Canada                                                     |
| BEJAOUI, Bouchara            | PhD. Student and Social Psychologist of Health                                      | University of Lyon                                            | France                                                     |
| Bekele, Alemayehu            | Civil Engineer/Geotechnical Engineer                                                | Addis Ababa university, Addis Ababa institute of technology   | Ethiopia                                                   |
| Bekken, Marijke              | Staff Air Pollution Specialist                                                      | California Air Resources Board (Retired)                      | United States of America (the)                             |
| Bekkouche, Yasmine           | Post-doctoral researcher                                                            | Université Libre de Bruxelles                                 | Belgium                                                    |
| Béla, Dominik                | Software engineer                                                                   | Technical University of Košice                                | Slovakia                                                   |
| Belachew, Kifleariam Yehuala | PhD Candidate at doctoral program in sustainable use of renewable natural resources | University of Helsinki                                        | Finland                                                    |
| Belgrano, Andrea             | Associate Professor                                                                 | Swedish University of Agricultural Sciences                   | Sweden                                                     |
| Belien, Evelyn               | Postdoctoral researcher, Forest ecology                                             | Uqac                                                          | Canada                                                     |
| BELIN, Catherine             | Retired                                                                             | Ifremer                                                       | France                                                     |
| Belisle, Marc                | Professor / Landscape-scale behavioral ecology                                      | Dep. de biologie, U de Sherbrooke                             | Canada                                                     |
| Bell, Julia                  | Doctor                                                                              | National health service                                       | United Kingdom of Great Britain and Northern Ireland (the) |
| Bell, Jerry                  | Professor of Chemistry Emeritus                                                     | Simmons University                                            | United States of America (the)                             |
| Bellamy, Patricia            | Environmental statistician                                                          |                                                               | United Kingdom of Great Britain and Northern Ireland (the) |
| Bellanger, Jean-Michel       | Researcher in Ecology/mycology                                                      | French National Center for Scientific Research                | France                                                     |
| Bellefroid, Elke             | Botanist curator living collections                                                 | Meise Botanic Garden                                          | Belgium                                                    |
| Bellemare, Jesse             | Associate Professor; Plant Ecologist                                                | Smith College                                                 | United States of America (the)                             |
| BELLEUDY, Philippe           | Prof. Emeritus / Hydrology                                                          | Université Grenoble Alpes IGE                                 | France                                                     |
| Belli, Veronica              | Forest Engineering                                                                  | Universidad Nacional Agraria La Molina                        | Peru                                                       |
| Belliard, Jérôme             | Aquatic Ecology                                                                     | Irstea                                                        | France                                                     |
| Bellido López, Juan Jesús    | Marine Research                                                                     | Aula del Mar                                                  | Spain                                                      |
| Bellini, Alberto             | Associate professor of energy conversion                                            | University of Bologna                                         | Italy                                                      |
| Bellos, Dimitris             | Biologist/Ecologist                                                                 | University of Bremen                                          | Greece                                                     |

|                               |                                                                                  |                                                                                                            |                                                            |
|-------------------------------|----------------------------------------------------------------------------------|------------------------------------------------------------------------------------------------------------|------------------------------------------------------------|
| Bellot, Sidonie               | Postdoctoral researcher                                                          | Royal Botanic Gardens Kew                                                                                  | United Kingdom of Great Britain and Northern Ireland (the) |
| Bellvé, André                 | PhD student (Environmental Science                                               | University of Auckland                                                                                     | New Zealand                                                |
| Belmaker, Amos                | Collection manager of birds                                                      | The Steinhardt Museum of Natural History, Tel Aviv University                                              | Israel                                                     |
| Belmaker, Miriam              | Associate Professor of Anthropology                                              | The University of Tulsa                                                                                    | United States of America (the)                             |
| Belmaker, Ilana               | Associate Professor of Public Health                                             | Ben Gurion University of the Negev                                                                         | Israel                                                     |
| Belohlavy, Stefanie           | PhD Student in Evolutionary Biology                                              | IST Austria                                                                                                | Austria                                                    |
| Bélondrade, Maxime            | PhD in Biochemistry                                                              |                                                                                                            | France                                                     |
| Belton, Sam                   | Final year PhD candidate in plant-microbe interactions.                          | University College Dublin                                                                                  | Ireland                                                    |
| Beltran, Juan F.              | Professor- Zoology                                                               | University of Seville                                                                                      | Spain                                                      |
| BELTRAN, CARMEN               | Associate Professor/Biological Area                                              | IBT-UNAM                                                                                                   | Mexico                                                     |
| Beltrán, Juan F.              | Profesor Titular                                                                 | Dept. Zoology, University of Seville                                                                       | Spain                                                      |
| Beltrán-Abaunza, José M.      | Research Scientist                                                               | AquaBiota Water Research                                                                                   | Sweden                                                     |
| Belzunces, Luc                | Director of Research                                                             | INRAE                                                                                                      | France                                                     |
| Bemis, Ashley                 | PhD Candidate, Astrophysics                                                      | McMaster University                                                                                        | Canada                                                     |
| Ben Mocha, Yitzchak           | Biology                                                                          | Max Planck Institute for Ornithology                                                                       | Germany                                                    |
| Ben-Hamadou, Radhouane        | Associate Professor, Head of Department of Biological and Environmental Sciences | Qatar University                                                                                           | Qatar                                                      |
| Benatar, Solomon              | Emeritus Professor of Medicine                                                   | University of Cape Town                                                                                    | South Africa                                               |
| Benavides, Martin             | PhD Candidate in Marine Sciences                                                 | UNC Institute of Marine Sciences                                                                           | United States of America (the)                             |
| Benavides-Mendoza, Adalberto  | Research Professor, Horticulture                                                 | Universidad Autónoma Agraria Antonio Narro                                                                 | Mexico                                                     |
| Benayas, Javier               | Ecology Professor                                                                | Universidad Autónoma de Madrid                                                                             | Spain                                                      |
| Benchimol-Reis, Luciana Lasry | Scientifica Researcher and Professor - Molecular Plant Genetics                  | Instituto Agrônômico de Campinas (IAC)/ Agronomic Institute of Campinas                                    | Brazil                                                     |
| Bencini, Roberta              | Associate Professor                                                              | The University of Western Australia                                                                        | Australia                                                  |
| Benda, Christian              | Scientist, Biochemistry and Structural Biology                                   | Max Planck Institute of Biochemistry                                                                       | Germany                                                    |
| Bendena, William              | Professor                                                                        | Queen's University                                                                                         | Canada                                                     |
| Bender, Irene M.A.            | Post-Doc - Functional diversity of plant-animal mutualism                        | Instituto de Ecología Regional (IER)                                                                       | Argentina                                                  |
| Bendixen, Quintin             | Senior Lecturer of Geology and Sustainability                                    | University of Wisconsin-Milwaukee at Waukesha                                                              | United States of America (the)                             |
| Bendre, Ameya                 | Research Associate (Structural Biology)                                          | National Centre for Cell Science                                                                           | India                                                      |
| Benedito Durá, Vicent         | Professor of Ecology                                                             | Universitat Politècnica de València                                                                        | Spain                                                      |
| Benedito Durà, Vicent         | Profesor Titular Ecología                                                        | Universitat Politècnica de València                                                                        | Spain                                                      |
| Benet, Luis                   | Associate Profesor / Physics                                                     | Universidad Nacional Autónoma de México                                                                    | Mexico                                                     |
| Benford, Frank                | Applied mathematics                                                              | Retired                                                                                                    | United States of America (the)                             |
| Bengtsson, Karin              | Senior lecturer plant ecology                                                    | Dept. of Ecology and Genetics, Uppsala University                                                          | Sweden                                                     |
| Bengtsson-Palme, Johan        | Assistant professor                                                              | Department of Infectious Diseases, Institute of Biomedicine, Sahlgrenska Academy, University of Gothenburg | Sweden                                                     |
| Benhaïem, Sarah               | Post-doc, Behavioural Ecology                                                    | Leibniz Institute for Zoo and Wildlife Research                                                            | Germany                                                    |

|                              |                                                               |                                                                        |                                                               |
|------------------------------|---------------------------------------------------------------|------------------------------------------------------------------------|---------------------------------------------------------------|
| Beninde, Jannik              | PhD Student in Biology                                        | University of Konstanz                                                 | Germany                                                       |
| Benítez López, Ana           | Postdoc researcher                                            | Estación Biológica de Doñana (EBD-CSIC)                                | Spain                                                         |
| Benito, César                | Full professor of Genetics                                    | University Complutense of Madrid                                       | Spain                                                         |
| BENITO-ALONSO, José-Luis     | Ph. Dr. Biology                                               | JOLUBE                                                                 | Spain                                                         |
| Benitz, Tabatha              | Biologist                                                     | Mamirauá Sustainable Development Institute                             | Brazil                                                        |
| Benjelloun, Badr             | Researcher in livestock conservation genomics                 | Institut National de la Recherche Agronomique<br>Morocco               | Morocco                                                       |
| Benkendorff, Kirsten         | Professor, Environmental Science                              | Southern Cross University                                              | Australia                                                     |
| Benkman, Craig               | Professor                                                     |                                                                        | United States of America (the)                                |
| Benko, Gabriella             | Plant Biology                                                 | Berkeley                                                               | United States of America (the)                                |
| Benn, Doug                   | Professor of Environmental Change                             | University of St Andrews                                               | United Kingdom of Great Britain<br>and Northern Ireland (the) |
| Bennai, Mohamed Tahar        | Assistant professor                                           | University of Boumerdes                                                | Algeria                                                       |
| Benner, Chris                | Professor, Environmental Studies and Sociology                | University of California Santa Cruz                                    | United States of America (the)                                |
| Bennett, Dorothy C           | Director, MOlecular & Clinical Sciences Research<br>Institute | St George's, University of London                                      | United Kingdom of Great Britain<br>and Northern Ireland (the) |
| Bennett, Elizabeth           | Vice President, Species Conservation                          | Wildlife Conservation Society                                          | United States of America (the)                                |
| Bennie, Jonathan             | Senior Lecturer in Geography                                  | University of Exeter                                                   | United Kingdom of Great Britain<br>and Northern Ireland (the) |
| Benning, Liane G             | Prof Interface Geochemistry                                   | GFZ German Research Centre fir Geosciences                             | Germany                                                       |
| Bennitt, Emily               | Senior research scholar in large herbivore ecology            | University of Botswana                                                 | Botswana                                                      |
| Benocci, Andrea              | Museum curator                                                | Museo di Storia Naturale dell'Accademia dei<br>Fisiocritici            | Italy                                                         |
| Benoit, Marc                 | Senior scientist un landscape agronomy                        | Institut National de Recherche Agronomique                             | France                                                        |
| Benot, Marie-Lise            | Assistant professor / Ecology                                 | University of Bordeaux                                                 | France                                                        |
| Bensoussan, Nathaniel        | Associate Researcher - Oceanography                           | Spanish Reasearch Council CSIC                                         | Spain                                                         |
| Bentall, Daniel              | Data Scientist                                                | Plant & Food Research                                                  | New Zealand                                                   |
| Bentkowski, Piotr            | Post-doc / computational biology                              | Institut Pierre Louis d'Epidémiologie et de Santé<br>Publique (IPLESP) | France                                                        |
| Bentley, Blair               | Postdoctoral Researcher                                       | University of Western Australia                                        | Australia                                                     |
| Bentley, Michael             | Associate Professor (retired)                                 | University of Tennessee, Knoxville                                     | United States of America (the)                                |
| Berbel-Filho, Waldir         | Evolutionary biology                                          | Swansea University                                                     | United Kingdom of Great Britain<br>and Northern Ireland (the) |
| Berben, Tom                  | Postdoctoral researcher                                       | Radboud University                                                     | Netherlands (the)                                             |
| Berdan, Emma                 | Researcher                                                    | University of Gothenburg                                               | Sweden                                                        |
| Berenguer Millanes, Cristina |                                                               | Wageningen University and Research (WUR)                               | Netherlands (the)                                             |
| Beresford, Alison            | Conservation Scientist                                        | RSPB Centre for Conservation Science                                   | United Kingdom of Great Britain<br>and Northern Ireland (the) |
| Beretz, Daniel               | Energy research, retired                                      |                                                                        | France                                                        |
| Berg, Judith                 | Wildlife Research                                             | Rocky Mountain National Park (R.A., Retired)                           | United States of America (the)                                |
| Berg, David                  | Computer Science                                              | IBM (Retired)                                                          | United States of America (the)                                |
| Berg, Shannon                | Health Services Researcher                                    | University of British Columbia                                         | Canada                                                        |

|                                 |                                                           |                                                                            |                                |
|---------------------------------|-----------------------------------------------------------|----------------------------------------------------------------------------|--------------------------------|
| Berg, Juliana                   | education scientist                                       | Federal University of Paraná                                               | Brazil                         |
| Berg PhD, Terrance              | Faculty                                                   | Kwanten Polytechnic University                                             | Canada                         |
| Bergallo, Helena                | Professor                                                 | Universidade do Estado do Rio de Janeiro                                   | Brazil                         |
| bergamini, ettore               | full professor of general pathology                       | currently Università Campus Biomedico Roma                                 | Italy                          |
| Berger, Eva                     | Economist, Postdoc                                        | University of Mainz                                                        | Germany                        |
| Berger, Josef                   | PhD                                                       | Lund University                                                            | Sweden                         |
| Berger, Anne                    | Biologist                                                 | Leibniz-Institute for Zoo and Wildlife Research                            | Germany                        |
| BERGER, Nicolas                 | Ecodesign                                                 | Bordeaux university                                                        | France                         |
| Berger-Tal, Oded                | Senior lecturer, ecology                                  | Ben-Gurion University of the Negev                                         | Israel                         |
| Berges, John                    | Professor of Biological Science                           | University of Wisconsin-Milwaukee                                          | United States of America (the) |
| Bergfors, Terese                | research engineer/structural biology                      | Uppsala University                                                         | Sweden                         |
| Bergman, steven                 | PhD Exploration Research Geology                          | retired gentleman geologist, now at SCB Geosciences                        | United States of America (the) |
| Bergman, Thore                  | Associate Professor, Psychology and Biology               | University of Michigan                                                     | United States of America (the) |
| Bergmann, Iris M.               | PhD Scholar                                               | University of Sydney                                                       | Australia                      |
| Bergs, Rolf                     | Economics & Political Science                             | PRAC                                                                       | Germany                        |
| Bergstrom, Bradley              | Professor of Biology                                      | Valdosta State University, Valdosta, GA                                    | United States of America (the) |
| berghold, Vincent               | Biologiste marin                                          | DEAL Guyane (Direction de l'environnement, aménagement et logement)        | French Guiana                  |
| Berhe, Asmeret Asefaw           | Professor, Soil Biogeochemistry                           | University of California, Merced                                           | United States of America (the) |
| Berjano, Regina                 | University Lecturer in Botany                             | University of Córdoba                                                      | Spain                          |
| Berk, Elizabeth                 |                                                           | Yale University                                                            | United States of America (the) |
| Berkeley, Elizabeth             | Assistant Professor of Biology and Earth Science          | Otterbein University                                                       | United States of America (the) |
| Berley, Robert                  | Psychology                                                | University of Washington - adjunct faculty, Psychiatry & Behavioral Health | United States of America (the) |
| Bermejo, Rodrigo                | Principal Investigator                                    | Spanish National Research Council                                          | Spain                          |
| Bermejo-Bermejo, Ana            | Ornithologist                                             | SEO/BirdLife                                                               | Spain                          |
| Bermudez Cruz, Rosa             | Researcher                                                | Research and advanced studies center                                       | Mexico                         |
| Bernadeta, Niesporek-Szamburska | Professor of Humanistic Sciences                          | University of Silesia in Katowice                                          | Poland                         |
| Bernadette, Teleky              | Research Assistant                                        | University of Agricultural Science and Veterinary Medicine of Cluj-Napoca  | Romania                        |
| Bernal, Ximena                  | Associate Professor                                       | Purdue University                                                          | United States of America (the) |
| Bernal, Ainhoa                  | Dr. in Marine Sciences                                    | University of Concepción                                                   | Chile                          |
| bernard, patrick                | mathematics                                               | Ecole Normale Supérieure                                                   | France                         |
| Bernard, David P                | Adjunct Professor                                         | Royal Roads University                                                     | United States of America (the) |
| Bernard, Jonathan               | Researcher, Epidemiology and Public Health                | Inserm                                                                     | France                         |
| Bernard, Marc                   | water quality                                             | Environnement office                                                       | Switzerland                    |
| Bernard, Jean-Philippe          | Directeur de recherche, Astronomy                         | CNRS                                                                       | France                         |
| BERNARD, Rozenn                 | Associate Professor in Biochemistry and Molecular Biology | Sorbonne Université Sciences, PARIS                                        | France                         |
| Bernardino, Joana               | Researcher biologist                                      | CIBIO-InBIO                                                                | Portugal                       |
| Bernardo, Nicola                | Predoctoral researcher                                    | Biological Station of Doñana                                               | Spain                          |

|                        |                                                                                                         |                                                                    |                                                            |
|------------------------|---------------------------------------------------------------------------------------------------------|--------------------------------------------------------------------|------------------------------------------------------------|
| Bernardo-Madrid, Rubén | PhD student                                                                                             | Estación Biológica de Doñana-CSIC                                  | Spain                                                      |
| bernas, harry          | research director, physics                                                                              | CNRS                                                               | France                                                     |
| Bernd, Karen           | Professor of Biology                                                                                    | Davidson College                                                   | United States of America (the)                             |
| Bernet, Matthias       | Associate Professor                                                                                     | Institute des Sciences de la Terre Université Grenoble Alpes       | France                                                     |
| Berriel, Diana         | MSc Marine Biology. Coastal Oceanography                                                                | CINVESTAV-Mérida                                                   | Mexico                                                     |
| Berrios, Hazel         | Biologist                                                                                               | University of Alaska Fairbanks                                     | United States of America (the)                             |
| Berrones, Arturo       | Academic Coordinator of the Graduate Systems Engineering Program at Autonomous University of Nuevo Leon | Autonomous University of Nuevo Leon                                | Mexico                                                     |
| Berry, Amanda          | Research Associate                                                                                      | Pharmaceutical Sciences                                            | United States of America (the)                             |
| Berry, Ashton          | Global Climate Change Programme Coordinator                                                             | BirdLife International                                             | United Kingdom of Great Britain and Northern Ireland (the) |
| Bersch, Beate          | Scientist in Structural Biology (PhD)                                                                   | Institut for Structural Biology - UGA-CNRS-CEA                     | France                                                     |
| Berseneff, Boris       | Ingénieur chercheur                                                                                     | CEA                                                                | France                                                     |
| Bertani, Rogerio       | Researcher / Zoologist                                                                                  | Instituto Butantan                                                 | Brazil                                                     |
| Bertassoni, Alessandra | Post-doc researcher                                                                                     | Federal University of Goiás                                        | Brazil                                                     |
| Berteaux, Dominique    | University Professor, Ecology                                                                           | Université du Québec à Rimouski                                    | Canada                                                     |
| Bertelsmeier, Cleo     | Professor of Ecology                                                                                    | University of Lausanne                                             | Switzerland                                                |
| Berthet, Méliissa      | Post-doc                                                                                                | École Normale Supérieure                                           | France                                                     |
| BERTHIER, Etienne      | Glaciologist                                                                                            | CNRS LEGOS                                                         | France                                                     |
| Berthomieu, Pierre     | Professor in Plant Physiology                                                                           |                                                                    | France                                                     |
| BERTILE, Fabrice       | Researcher                                                                                              | CNRS                                                               | France                                                     |
| Bertini, Giuseppe      | Assistant Professor of Histology                                                                        | University of Verona                                               | Italy                                                      |
| Bertman, Steve         | Professor of Chemistry                                                                                  | Western Michigan University                                        | United States of America (the)                             |
| Bertola, Laura         | Postdoctoral researcher                                                                                 | City College of New York                                           | United States of America (the)                             |
| Bertoldi, Giacomo      | Senior researcher, Ph.D., Hydrologist                                                                   | Eurac research                                                     | Italy                                                      |
| Bertolino, Sandro      | Professor in Ecology                                                                                    | University of Turin                                                | Italy                                                      |
| Bertora, Chiara        | Researcher in Agroecology                                                                               | University of Turin                                                | Italy                                                      |
| Bertossi, Alberto      | PhD student                                                                                             | University of Udine                                                | Italy                                                      |
| Bertoazzo, Filippo     | PhD student in Palaeontology                                                                            | Queen's University Belfast                                         | United Kingdom of Great Britain and Northern Ireland (the) |
| Bertram, Michael       | Postdoctoral Researcher                                                                                 | Swedish University of Agricultural Sciences                        | Sweden                                                     |
| Bertram, Christiane    | Assistant Professor                                                                                     | University Konstanz                                                | Germany                                                    |
| Bertrand, Philip       | PhD Candidate - Arctic Ecology                                                                          | Université du Québec à Rimouski (UQAR) - Norsk Polarinstitut (NPI) | Canada                                                     |
| Bertrand, Guillaume    | Lecturer in Hydrogeology and Hydrogeochemistry                                                          | Laboratoire Chrono-Environnement                                   | France                                                     |
| Bertrand, Arnaud       | Marine Ecology                                                                                          | IRD                                                                | France                                                     |
| Bertsch, Hans          | Marine Biology                                                                                          | Dr.                                                                | United States of America (the)                             |
| Bertuzzi, Patrick      | Research engineer - Director of AgroClim Laboratory                                                     | INRA                                                               | France                                                     |
| Bertzky, Monika        | Independent Consultant                                                                                  |                                                                    | Italy                                                      |

|                            |                                                                         |                                                              |                                                            |
|----------------------------|-------------------------------------------------------------------------|--------------------------------------------------------------|------------------------------------------------------------|
| Bertzky, Bastian           | Scientific Project Officer                                              | Joint Research Centre (JRC) of the European Commission       | Italy                                                      |
| Berville, Laurence         | Engineer / PhD                                                          | University of Tours / CNRS                                   | France                                                     |
| Besic, Nikola              | Postdoctoral researcher                                                 | Météo France                                                 | France                                                     |
| Besio, Roberta             | Post doctoral fellow                                                    | University of Pavia                                          | Italy                                                      |
| Besnard, Simon             | Post-doctoral                                                           | Max Planck Institute for Biogeochemistry                     | Germany                                                    |
| BESNARD, GUILLAUME         | Researcher                                                              | CNRS                                                         | France                                                     |
| Bessa, Eduardo             | Assistant professor of zoology                                          | University of Brasilia                                       | Brazil                                                     |
| Bessa Gomes, Carmen        | Lecture, Ecology                                                        | AgroParisTech                                                | France                                                     |
| Besse, Philippe            | Full professor of Mathematics                                           | Toulouse University                                          | France                                                     |
| Bessell, Tyson             | PhD candidate                                                           | Institute for Marine and Antarctic Studies                   | Australia                                                  |
| Besset, Manon              | Postdoctoral researcher                                                 | Geosciences Montpellier                                      | France                                                     |
| Bessiere, Pierre           | PhD student and veterinarian                                            | INRA                                                         | France                                                     |
| Besson, Mireille           | Researcher in cognitive neuroscience                                    | CNRS and Aix-Marseille University                            | France                                                     |
| Best, Megan                | Student MSc Environmental Sustainability                                | UCD                                                          | Ireland                                                    |
| Best, Peter                | Geophysics                                                              |                                                              | Canada                                                     |
| Besteiro, Isidro José      | Biologist                                                               | Droga Conde S.A.                                             | Spain                                                      |
| Bester, Laura              | PhD Student                                                             | University of Pretoria                                       | South Africa                                               |
| Betancourt-Portela, Julian | Chemical Engineer                                                       | INVEMAR                                                      | Colombia                                                   |
| Bethanis, Kostas           | Assistant Professor                                                     | Agrivultural University of Athens                            | Greece                                                     |
| Bethell, Emily             | Senior Lecturer in Primate Behaviour                                    | Liverpool John Moores University                             | United Kingdom of Great Britain and Northern Ireland (the) |
| Betley, Stanislaw          | professor, mathematics                                                  | University of Warsaw                                         | Poland                                                     |
| Betts, Matt                | Professor                                                               | Oregon State University                                      | United States of America (the)                             |
| Betzler, Shirin            | Cross-cultural Business Psychology                                      | Osnabrueck University                                        | Germany                                                    |
| Beudels-Jamar, Roseline    | Head, Conservation Biology Unit                                         | Royal Belgian Institute of Natural Sciences                  | Belgium                                                    |
| Beukhof, Esther            | Researcher                                                              | Wageningen Marine Research                                   | Netherlands (the)                                          |
| Beutner, Frank             | Medicine                                                                | Heart Center Leipzig                                         | Germany                                                    |
| Bevans, Rebecca            | Ecology                                                                 | VU Amsterdam                                                 | Netherlands (the)                                          |
| Beven, Laure               | Microbiology                                                            | University of Bordeaux INRA                                  | France                                                     |
| Bevilaqua, Dušan           | landscape ecologist                                                     | Catholic University in Ružomberok                            | Slovakia                                                   |
| Beyersmann, Elisabeth      | Lecturer, Cognitive Science                                             | Macquarie University                                         | Australia                                                  |
| Beynon, Belinda            | Veterinarian                                                            | Serpentine Vet                                               | Australia                                                  |
| Bezak, Peter               | landscape ecology scientist                                             | Institute of Landscape Ecology of Slovak Academy of Sciences | Slovakia                                                   |
| Bezte, Candi               | Instructor, University of Winnipeg - Biology and Environmental Sciences | University of Winnipeg                                       | Canada                                                     |
| Bhalerao, Amol Kamalakar   | Scientist (Agriculture)                                                 | Indian Council of Agricultural Research                      | India                                                      |
| Bhattacharya, Saurabh      | Post-doctoral research fellow                                           | The Hebrew University of Jerusalem                           | Israel                                                     |
| Bhogaraju, Sagar           | Group leader/ Structural biology                                        | EMBL                                                         | France                                                     |
| Bi, Qingfang               | PhD student                                                             | Zhejiang university                                          | China                                                      |

|                               |                                                         |                                                                 |                                                            |
|-------------------------------|---------------------------------------------------------|-----------------------------------------------------------------|------------------------------------------------------------|
| Bialasiewicz, Seweryn         | Senior Research Fellow                                  | University of Queensland                                        | Australia                                                  |
| Bialozyt, Ronald              |                                                         | Northwest Forest Research Institute                             | Germany                                                    |
| Bianchi, Carlo Nike           | Professor of Ecology                                    | University of Genoa                                             | Italy                                                      |
| Bianchi, Carlos               | Professor                                               | Universidade Federal de Goiás                                   | Brazil                                                     |
| Bianchi, Rita                 | Professor/Ecology                                       | São Paulo State University                                      | Brazil                                                     |
| Bianchi, Andrea               | Professor of Physics                                    | Universite de Montreal                                          | Canada                                                     |
| Bianchi, Andrea               | PhD Student                                             | University of Bonn                                              | Italy                                                      |
| Biancolini, Dino              | PhD candidate in Evolutionary and Environmental Biology | Sapienza University of Rome                                     | Italy                                                      |
| Biard, Yannick                | Life Cycle Assessment of agri-food products             | CIRAD                                                           | France                                                     |
| Biard, Clotilde               | Associate Professor in Ecology & Evolution              | Sorbonne Université                                             | France                                                     |
| BIBBINS, MARTHA               | Research leader                                         | National Polytechnic Institute (IPN)                            | Mexico                                                     |
| Biber, Jean-Pierre            | biologist                                               | Bureau Natcons                                                  | Switzerland                                                |
| bibi, sidra                   | researcher                                              | TU Berlin                                                       | Germany                                                    |
| Bicca-Marques, Júlio César    | Professor                                               | Pontifical Catholic University of Rio Grande do Sul             | Brazil                                                     |
| Bichet, Vincent               | Dr. Associate Professor / Geosciences                   | University of Franche-Comté                                     | France                                                     |
| Bicknell, Jake                | Lecturer in Conservation Biology                        | University of Kent                                              | United Kingdom of Great Britain and Northern Ireland (the) |
| Bicudo, Jose Eduardo          | Emeritus Professor of Physiology                        | University of São Paulo                                         | Brazil                                                     |
| bicudo da silva, ramon felipe | Environmental Sciences                                  | State University of Campinas                                    | Brazil                                                     |
| Biddanda, Bopi                | Professor of Water Resources                            | Annis Water Resources Institute, Grand Valley State University  | United States of America (the)                             |
| Bieber, Claudia               | Senior Researcher                                       | Department of Interdisciplinary Life Sciences                   | Austria                                                    |
| Biedermann, Peter             |                                                         | University Wuerzburg                                            | Germany                                                    |
| Biemans, Floor                | Post-doctoral researcher veterinary epidemiology        | University College Dublin                                       | France                                                     |
| Biermann, Lauren              | Remote sensing scientist                                | Plymouth Marine Laboratory                                      | United Kingdom of Great Britain and Northern Ireland (the) |
| Bierne, Nicolas               | Director of research                                    | CNRS                                                            | France                                                     |
| Bigatti, Gregorio             | Principal Resarcher                                     | IBIOMAR-CONICET                                                 | Argentina                                                  |
| Bígio, Narcísio Costa         | Professor of Systematic Botany                          | University Federal of Rondônia                                  | Brazil                                                     |
| Biketova, Alona               | postdoctoral researcher, biology                        | Biological Research Centre of the Hungarian Academy of Sciences | Hungary                                                    |
| Bilan, Meri                   | PhD student                                             | University of Salento                                           | Italy                                                      |
| Bilcke, Joke                  |                                                         | Antwerp University                                              | Belgium                                                    |
| Biliskov, Nikola              | Research associate, Chemistry                           | Rudjer Boskovic Institute, Zagreb                               | Croatia                                                    |
| Billaud, Olivier              | PhD student                                             | Muséum Nationale d'Histoire Naturelle                           | France                                                     |
| Billebaud, Françoise          | Senior scientist, Astrophysics                          | Laboratoire d'Astrophysique de Bordeaux, Bordeaux University    | France                                                     |
| Billen, Gilles                | Prof Biogeochemistry                                    | CNRS _Sorbone Université                                        | France                                                     |
| Billings, Dorothy             | Professor Emeritua Anthropology                         | Wichita State University                                        | United States of America (the)                             |
| Bilodeau, Stéphane            | PhD, Master in Applied Sciences, Engineer               | University of Sherbrooke / Enerstat / Novacab                   | Canada                                                     |

|                                  |                                               |                                                                              |                                                            |
|----------------------------------|-----------------------------------------------|------------------------------------------------------------------------------|------------------------------------------------------------|
| Bilton, David                    | Professor of Aquatic Biology                  | University of Plymouth                                                       | United Kingdom of Great Britain and Northern Ireland (the) |
| Binette, Luc                     | Researcher in astrophysics                    | Instituto de Astronomía, Universidad Nacional Autónoma de Mexico             | Mexico                                                     |
| Binggeli, Anaïs                  | Conservation biologist                        | University of Bern                                                           | Switzerland                                                |
| Bingre do Amaral, Pedro          | Professor                                     | Instituto Politécnico de Coimbra                                             | Portugal                                                   |
| Binosi, Daniele                  | Physicist                                     | European Centre for theoretical studies in nuclear physics and related areas | Italy                                                      |
| Biondo, Monica                   | Head of Research and Conservation             | Fondation Franz Weber                                                        | Switzerland                                                |
| Biondo, Cibebe                   | Associate Professor/Evolutionary Ecology      | UFABC                                                                        | Brazil                                                     |
| Bird, Tomas                      | International Development                     | United Nations Population Fund                                               | Canada                                                     |
| Bird, Tharina                    | Lecturer, Arachnologist                       | Botswana International University of Science and Technology                  | Botswana                                                   |
| Birkeland, Charles               | Professor Emeritus Marine Biology             | University of Hawaii at Manoa                                                | United States of America (the)                             |
| Birkholz, Mario                  | Physicist                                     | Joint Lab Bioelectronics IHP/TU Berlin                                       | Germany                                                    |
| Birt, Tim                        | Adjunct Professor of Biology                  | Queen's University                                                           | Canada                                                     |
| Birtill, John                    | Honorary Senior Research Fellow               | University of Glasgow                                                        | United Kingdom of Great Britain and Northern Ireland (the) |
| Bis, Barbara                     | Freshwater Ecologist                          | University of Łódź                                                           | Poland                                                     |
| Bisaccia-Bijelic, Marilena       | PhD student, bioorganic chemistry             | Faculty of Chemistry, University of Vienna                                   | Austria                                                    |
| Bissessur, Prishnee              | PhD candidate                                 | University of Mauritius                                                      | Mauritius                                                  |
| Bisson, Terrence                 | Department of Mathematics and Statistics      | Canisius College                                                             | United States of America (the)                             |
| Biswas, Asim                     | Associate Professor                           | University of Guelph                                                         | Canada                                                     |
| Bittebiere, Anne-Kristel         | Assistant Professor                           | Université Lyon 1 - UMR 5023 LEHNA                                           | France                                                     |
| Bittencourt, Paulo               | Plant Ecologist                               | University of Exeter                                                         | United Kingdom of Great Britain and Northern Ireland (the) |
| Bittioli Rodrigues Gomes, Felipe | Professor                                     | Universidade Federal do Pará                                                 | Brazil                                                     |
| Bittman, Roxanne                 | Conservation biologist and plant ecologist    | California Natural Diversity Database, CDFW                                  | United States of America (the)                             |
| Bittrich, Volker                 | Professor / Botany                            |                                                                              | Brazil                                                     |
| Bitzidou, Malamati               | Postdoctoral Researcher                       | The Francis Crick Institute                                                  | United Kingdom of Great Britain and Northern Ireland (the) |
| Bizzo, Nelio                     | Full Senior Professor                         | University of São Paulo                                                      | Brazil                                                     |
| Bjornstad, Bruce                 | Geologist                                     | Retired                                                                      | United States of America (the)                             |
| Blacher, Pierre                  | Researcher in evolutionary biology            | University of Lausanne                                                       | Switzerland                                                |
| Black, Sandra                    | Clinical Associate Professor                  | University of Calgary Faculty of Veterinary Medicine                         | Canada                                                     |
| Black, Morgan                    |                                               | University of Victoria                                                       | Canada                                                     |
| Black, Scott                     | Executive Director                            | The Xerces Society for Invertebrate Conservation                             | United States of America (the)                             |
| Black, Peter                     | Veterinary epidemiologist                     | Essential Foresight                                                          | Australia                                                  |
| Black, James                     | Experimental scientist                        | Institute fir Marine and Antarctic Studies                                   | Australia                                                  |
| Black, Cameron                   | Clinical application of Regenerative Medicine | University of Southampton                                                    | United Kingdom of Great Britain and Northern Ireland (the) |
| Black-Decima, PATRICIA           | Retired Professor of Animal Behavior, Biology | Universidad Nacional de Tucuman                                              | Argentina                                                  |

|                          |                                                 |                                                                  |                                                            |
|--------------------------|-------------------------------------------------|------------------------------------------------------------------|------------------------------------------------------------|
| Blackburn, David         | Associate Curator                               | University of Florida                                            | United States of America (the)                             |
| BlackEagle, Cory         | geologist                                       | Eastern Kentucky University                                      | United States of America (the)                             |
| Blackler, Thea           | Professor of industrial design                  | Queensland University of technology                              | Australia                                                  |
| Blackmore, Susan         | Visiting Professor in Psychology                | University Of Plymouth                                           | United Kingdom of Great Britain and Northern Ireland (the) |
| Blackmore, Stephen       | Queen's Botanist and Honorary Fellow            | Royal Botanic Garden Edinburgh                                   | United Kingdom of Great Britain and Northern Ireland (the) |
| Blackshaw, James         | Scientific Data Engineer                        | EMBL-EBI                                                         | United Kingdom of Great Britain and Northern Ireland (the) |
| Blackwell, Eric          | Associate Professor of Biology                  | Delta State University                                           | United States of America (the)                             |
| Blair, Gordon            | Distinguished Professor                         | Lancaster University                                             | United Kingdom of Great Britain and Northern Ireland (the) |
| Blair, Danny             | Professor of Geography                          | University of Winnipeg                                           | Canada                                                     |
| Blair, Zachary           | Anthropology                                    |                                                                  | United States of America (the)                             |
| Blair, Alan              | Clinical Psychologist                           | NHS                                                              | United Kingdom of Great Britain and Northern Ireland (the) |
| Blais, Alexandre         | Scientific director, Institut quantique         | Université de Sherbrooke                                         | Canada                                                     |
| blake, stephen           | Assistant Professor, Biology                    | Saint Louis University                                           | United States of America (the)                             |
| Blake, David             | Independent researcher                          |                                                                  | United Kingdom of Great Britain and Northern Ireland (the) |
| Blakemore, Rob           | Soil Ecologist                                  | VermEcology                                                      | Japan                                                      |
| Blanc, Lori              | Assistant Professor, Conservation Biology       | Virginia Tech                                                    | United States of America (the)                             |
| Blanc, lilian            | Ecology                                         | CIRAD                                                            | France                                                     |
| Blanc, Guillaume         | Associate professor in physics (astrophysics)   | Université Paris Diderot, Laboratoire de l'Accélérateur Linéaire | France                                                     |
| BLANC, Antoine           | PhD student / Hydro-meteorology                 | Institut des Géosciences de l'Environnement (IGE)                | France                                                     |
| Blanc-Mathieu, Romain    |                                                 | Kyoto University                                                 | Japan                                                      |
| Blanch Llosa, Estefania  | Researcher in aeronomy physics                  | Observatori de l'Ebre                                            | Spain                                                      |
| Blanchard, Alain         | Professor of microbiology                       | University of Bordeaux                                           | France                                                     |
| Blanchart, Eric          | Senior scientist / soil ecologist               | IRD                                                              | France                                                     |
| Blanchon, Paul           | Research Scientist                              | Inst. Ciencias del Mar, Univ. Nac. Auto. de Mexico               | Mexico                                                     |
| Blanchouin, Arnaud       | Engineer                                        | Irstea                                                           | France                                                     |
| Blanckenberg, Michelle   | Conservation Biology PhD candidate              | University of Cape Town                                          | South Africa                                               |
| Blanco, Victor           | Postdoctoral researcher / environmental science | ETH Zurich                                                       | Switzerland                                                |
| Blanco, Juan A.          | Assitant Professor, Ecology                     | Univresidad Publica de Navarra                                   | Spain                                                      |
| Blanco-Libreros, Juan    | Full Professor in Ecology                       | Instituto de Biología, Universidad de Antioquia                  | Colombia                                                   |
| Blanco-Sacristán, Javier | PhD student                                     | University of Milano-Bicocca                                     | Italy                                                      |
| Blankers, Thomas         | Postdoctoral fellow in evolutionary genetics    |                                                                  | Netherlands (the)                                          |
| Blankespoor, Harvey D.   | Professor Emeritus of Biology                   | Hope College and Univ. of Michigan Biol. Station                 | United States of America (the)                             |
| Blankestijn, Wouter      | Research Assistant                              | Swedish University of Agricultural Sciences (SLU)                | Sweden                                                     |
| Blanton, Natalie         | PhD Candidate - Sociology                       | University of Utah                                               | United States of America (the)                             |
| Blarr, Maria             | PhD Student                                     | Chalmers University of Technology                                | Sweden                                                     |

|                            |                                                                            |                                                                                                |                                                            |
|----------------------------|----------------------------------------------------------------------------|------------------------------------------------------------------------------------------------|------------------------------------------------------------|
| Blas, Julio                | Tenured Researcher, Ecology                                                | Spanish Research Council CSIC                                                                  | Spain                                                      |
| Blaschka, Albin            | Researcher                                                                 | AREC Raumberg-Gumpenstein                                                                      | Austria                                                    |
| Blaschke, Paul             | Environmental Consultant, lecturer and Honorary Research Fellow            | Victoria University of Wellington                                                              | New Zealand                                                |
| Blasdel, Kim               | Infectious diseases                                                        | Commonwealth Scientific and Industrial Research Organisation                                   | Australia                                                  |
| Blaser, Patrick            | Scientist in paleoclimatology                                              | Heidelberg University                                                                          | Germany                                                    |
| Blaszczyk, Maria           | Research Affiliate, Department of Biological Anthropology                  | University of Texas at Austin                                                                  | United States of America (the)                             |
| Blättler, Linda            | PhD student - Environmental studies                                        | Center of Environment, Charles University in Prague                                            | Czech Republic (the)                                       |
| Blau, Judith               | professor emerita                                                          | university of north carolina chapel hill                                                       | United States of America (the)                             |
| Blaurock, Katharina        | PhD Student - Hydrology                                                    | University of Bayreuth                                                                         | Germany                                                    |
| Blaustein, Edgar           | Economist                                                                  | Global Chance                                                                                  | France                                                     |
| Blecher, Arantxa           | MSc Zoology Student                                                        | University of Pretoria                                                                         | South Africa                                               |
| BLEIN-NICOLAS, Mélisande   | Research engineer / plant biology                                          | INRA                                                                                           | France                                                     |
| Bleu, Josefa               | Associate Professor in Ecology                                             | University of Strasbourg                                                                       | France                                                     |
| Bley Loez, Carolina        | Enseignant-chercheur                                                       | ISIT                                                                                           | France                                                     |
| Blicharska, Malgorzata     | Associate Professor, Senior Lecturer                                       | Uppsala University                                                                             | Sweden                                                     |
| Bligh, Chris               | Applied Bilogist                                                           | Brunel University Graduate 1977                                                                | United Kingdom of Great Britain and Northern Ireland (the) |
| Blight, Louise             | Adjunct Associate Professor/ AND Principal                                 | School of Environmental Studies, University of Victoria/ AND Procellaria Research & Consulting | Canada                                                     |
| Block, Thomas              | Professor Department of Political Sciences                                 | Ghent University                                                                               | Belgium                                                    |
| Blockstein, David          | Senior Adviser                                                             | Association for Environmental Studies and Sciences                                             | United States of America (the)                             |
| Blonda, Massimo            | Researcher                                                                 | CNR                                                                                            | Italy                                                      |
| Blondé, Ward               | PhD bioinformatics                                                         |                                                                                                | Belgium                                                    |
| Blondeau Da Silva, Anne    | Lecturer in Ecology                                                        | University of Limoges                                                                          | France                                                     |
| Błońska, Agnieszka         | biology                                                                    | University of Silesia in Katowice                                                              | Poland                                                     |
| Blouin, Richard            | Professor, cell biology                                                    | Université de Sherbrooke                                                                       | Canada                                                     |
| Bluhm, Chris               | PhD student and Scientific Assistant                                       | Martin-Luther-University Halle-Wittenberg                                                      | Germany                                                    |
| Blum, Brett                | Wildlife Biologist/Manager Biological Field Station and Experimental Range | University of Arizona                                                                          | United States of America (the)                             |
| Blumstein, Daniel          | Professor of Ecology and Evolutionary Biology                              | University of California Los Angeles                                                           | United States of America (the)                             |
| Blundo, Cecilia            | Research assistant                                                         | IER CONICET-UNT                                                                                | Argentina                                                  |
| Boatman, Bruce             | Research Operator                                                          | University of Zurich                                                                           | Switzerland                                                |
| Boccasavia, Viola Lucrezia | Post Doc Researcher                                                        |                                                                                                | Italy                                                      |
| Bochaton, Nicolas          | Limnology                                                                  |                                                                                                | France                                                     |
| Bochorny, Thuane           | PhD in Plant Biology                                                       | Universidade Estadual de Campinas                                                              | Brazil                                                     |
| Böckle, Theresa            | Ecology                                                                    | University of Vienna                                                                           | Austria                                                    |
| Bockmann, Flávio           | Professor, Head of Department                                              | University of São Paulo, FFCLRP, Dept. Biology                                                 | Brazil                                                     |
| Bocksberger, Gaelle        | Post-Doctoral research fellow                                              | Max Planck Institute for Evolutionary Anthropology                                             | Germany                                                    |
| Boco, Sheldon Rey          | Researcher                                                                 | Philippine Jellyfish Stings Project                                                            | Philippines (the)                                          |

|                                  |                                                               |                                                                          |                                                            |
|----------------------------------|---------------------------------------------------------------|--------------------------------------------------------------------------|------------------------------------------------------------|
| Bodart, Julien                   | PhD candidate                                                 | University of Edinburgh                                                  | United Kingdom of Great Britain and Northern Ireland (the) |
| Bode, Nena                       | action researcher in transition management/innovation studies | Dutch Research Institute for Transitions                                 | Netherlands (the)                                          |
| Boden, Rich                      | Associate Head of School, Bacteriologist-Chemist              | University of Plymouth                                                   | United Kingdom of Great Britain and Northern Ireland (the) |
| Bodenbender, Brian               | Professor of Geology and Environmental Science                | Hope College                                                             | United States of America (the)                             |
| Bodensteiner, Brooke             | PhD student in ecology and evolutionary biology               | Yale University                                                          | United States of America (the)                             |
| Bodie, Walter                    | Chemist                                                       | Retired                                                                  | United States of America (the)                             |
| Bodley, John H.                  | Professor Emeritus, Anthropology                              | Washington State University                                              | United States of America (the)                             |
| Boehm, Robert                    | PhD Physics                                                   | DHBW                                                                     | Germany                                                    |
| Boehmer, Wendelin                | Postdoctoral Researcher in AI                                 | University of Oxford                                                     | United Kingdom of Great Britain and Northern Ireland (the) |
| Boehmer, Hans Juergen            | Professor of Biogeography                                     | University of the South Pacific                                          | Fiji                                                       |
| Boeing, Wiebke                   | Professor in Aquatic Ecology                                  | New Mexico State University                                              | United States of America (the)                             |
| Böer, Tim                        | Master Student: Life Sciences                                 | Institute for Microbiology and Genetics                                  | Germany                                                    |
| Boerma, Marjan                   | Associate Professor, Radiation Biology                        | –                                                                        | United States of America (the)                             |
| Boero, Ferdinando                | Professor of zoology                                          | Università di Napoli Federico II                                         | Italy                                                      |
| Boët, Philippe                   | Director of research                                          | IRSTEA                                                                   | France                                                     |
| Boetius, Antje                   | oceanographer                                                 | Alfred Wegener Institute, Helmholtz Center for Polar and Marine Research | Germany                                                    |
| BOGEAT-TRIBOULOT, Marie-Béatrice | Forest ecophysiologicalist                                    | INRA                                                                     | France                                                     |
| Boggero, Angela                  | Researcher - Biology                                          | CNR - Water Research Institute, Verbania                                 | Italy                                                      |
| Boggs, Carol                     | Professor, Ecology & Evolution                                |                                                                          | United States of America (the)                             |
| Bogin, Barry                     | Professor Biological Anthropology                             | Loughborough University                                                  | United Kingdom of Great Britain and Northern Ireland (the) |
| Boglino, Anaïs Deborah           | FTPR                                                          | UPEN                                                                     | Mexico                                                     |
| Bogoni, Juliano                  | Postdoc research                                              | UNIVERSIDADE DE SAO PAULO                                                | Brazil                                                     |
| Bohi, Aminr                      | Postdoc in computer vision and image processing               | Institut of Neurosciences of la Timone                                   | France                                                     |
| Bohigas, Joaquin                 | Full professor/Astronomy                                      | UNAM                                                                     | Mexico                                                     |
| Bohle, Martin                    | Ronin Research Scholar / Geoethics                            | European Commission                                                      | Germany                                                    |
| Bohlin-Nizzetto, Pernilla        | Senior Scientist, Environmental Science                       | NILU - Norwegian Institute for Air Research                              | Norway                                                     |
| Böhm, Johannes                   | Environmental Science and Technology                          |                                                                          | Germany                                                    |
| Bohn, Amabily                    | Student - Msc Botany                                          | UFPR                                                                     | Brazil                                                     |
| Bohn, Friedrich                  | PostDoc                                                       | Helmholtz Centre for Environmental Research - UFZ                        | Germany                                                    |
| Bois, Paul                       | Assistant Professor                                           | ENGES                                                                    | France                                                     |
| Boissonnet, Tom                  | PhD Student / Neurobiology                                    | EMBL Rome                                                                | Italy                                                      |
| Boivin, Thomas                   | Researcher in forest ecology                                  | I.N.R.A.                                                                 | France                                                     |
| Boix, Dani                       | Associate Professor                                           | Institute of aquatic Ecology - University of Girona                      | Spain                                                      |
| Bojadzija Savic, Gorenka         | PhD student                                                   |                                                                          | France                                                     |
| Bolger, Thomas                   | Full Professor of Zoology                                     | University College Dublin                                                | Ireland                                                    |

|                             |                                                       |                                                                       |                                                            |
|-----------------------------|-------------------------------------------------------|-----------------------------------------------------------------------|------------------------------------------------------------|
| Bolger, Paul                | Environmental Science                                 | University College Cork                                               | Ireland                                                    |
| Böll, Susanne               | Biologist                                             | Bavarian Institute for Viticulture and Horticulture                   | Germany                                                    |
| Bollinger, Dominique        | Professor in environmental engineering                | HEIG-VD                                                               | Switzerland                                                |
| Bolognin, Marco             | PhD candidate                                         | TU Delft                                                              | Netherlands (the)                                          |
| Bolt Botnen, Amanda         | PhD student                                           | University of Copenhagen                                              | Denmark                                                    |
| Bolton, John J.             | Emeritus Professor and algal biologist                | University of Cape Town                                               | South Africa                                               |
| Bomfim, Barbara             | Postdoctoral Fellow                                   | University of Oregon, Eugene                                          | United States of America (the)                             |
| BOMFIM, JAMILLE             | University Analyst                                    | Universidade Estadual de Santa Cruz                                   | Brazil                                                     |
| Bomphrey, Richard           | Professor                                             | Royal Veterinary College                                              | United Kingdom of Great Britain and Northern Ireland (the) |
| Bon, Stefan                 | Professor of polymer and colloid chemical engineering | The University of Warwick                                             | United Kingdom of Great Britain and Northern Ireland (the) |
| BON, Richard                | Assistant Professor                                   | Université Paul Sabatier- Toulouse III                                | France                                                     |
| Bonaccorso, Elisa           | Professor-Researcher/Biology                          | Universidad San Francisco de Quito                                    | Ecuador                                                    |
| Bonal, Mathias              | PhD in Agronomic Sciences and Bioengineering          | Université Libre de Bruxelles                                         | Belgium                                                    |
| Bonari, Gianmaria           | Postdoctoral researcher                               | Department of Botany and Zoology, Masaryk University                  | Czech Republic (the)                                       |
| Bonasia, Grazia             | Biology                                               |                                                                       | Italy                                                      |
| Bonatto, Sandro             | Professor of Evolutionary Genetics                    | PUCRS                                                                 | Brazil                                                     |
| Bond, Kathryn               | Geoscientist                                          |                                                                       | United Kingdom of Great Britain and Northern Ireland (the) |
| Bond, Alexander             | Senior Curator in Charge of Birds                     | The Natural History Museum                                            | United Kingdom of Great Britain and Northern Ireland (the) |
| Bond, Monica                | Wildlife Biology                                      | Wild Nature Institute                                                 | United States of America (the)                             |
| Bondé, Loyapin              | PhD in plant Biology and Ecology                      | Université Joesph Ki-Zerbo                                            | Burkina Faso                                               |
| Bondeau, Alberte            | senior scientist                                      | CNRS                                                                  | France                                                     |
| BONET, ANDREU               | Professor, Department of Ecology                      | UNIVERSIDAD DE ALICANTE                                               | Spain                                                      |
| BONFANTE, PAOLA             | Professor Emerita-Plant biology                       | University of Torino, Department of Life Sciences and Systems Biology | Italy                                                      |
| Bonfim, Fernando            | PhD Student/Ecology                                   | Universidade Estadual de Santa Cruz                                   | Brazil                                                     |
| Bongers, Frans              | professor tropical forest ecology                     | Wageningen University & Research                                      | Netherlands (the)                                          |
| Bonhomme, François          | Population Genetics                                   | CNRS                                                                  | France                                                     |
| Bonilla Barbosa, Jaime Raúl | Director del Centro de investigaciones Biológicas     | Universidad Autónoma del Estado de Morelos                            | Mexico                                                     |
| Bonin, Aurélie              | Postdoctoral researcher in ecology                    | University of Milan                                                   | Italy                                                      |
| Bonisoli-Alquati, Andrea    | Assistant Professor                                   | California State Polytechnic University, Pomona                       | United States of America (the)                             |
| Bonitz, Steffen             | medical doctor                                        | Sophien- und Hufelandklinikum Weimar                                  | Germany                                                    |
| Bonizzoni, Silvia           | Executive director - Marine biologist                 | Dolphin Biology and Conservation                                      | Italy                                                      |
| Bonkowski, Michael          | Professor of Terrestrial Ecology                      | University of Cologne, Department of Biology                          | Germany                                                    |
| Bonneaud, Camille           | Associate Professor                                   | University of Exeter                                                  | United Kingdom of Great Britain and Northern Ireland (the) |
| Bonnefond, Pascal           | researcher / Geodesy                                  | Observatoire de Paris - SYRTE                                         | France                                                     |
| Bonnell, Tyler              | Postdoctoral researcher behavioural ecology           | University of Lethbridge                                              | Canada                                                     |

|                            |                                                               |                                                                    |                                                            |
|----------------------------|---------------------------------------------------------------|--------------------------------------------------------------------|------------------------------------------------------------|
| Bonnemain, Thibault        | PhD student, Theoretical Physics                              | LPTMS                                                              | France                                                     |
| Bonnet, Marie-Paule        | Researcher, hydrology                                         | Institut de Recherche pour le Développement                        | France                                                     |
| BONNET-BEAUGRAND, Florence | Assistant professor                                           | UMR BIOEPAR                                                        | France                                                     |
| BONNEU, MARC               | PROFESSOR OF BIOTECHNOLOGY                                    | BORDEAUX INP                                                       | France                                                     |
| Bonneville, Jean-Marc      | CNRS searcher, biologist: Mosquito resistance to insecticides | Laboratoire d'Ecologie Alpine, UMR 5553, CNRS-UGA, Grenoble        | France                                                     |
| Bonnineau, Chloe           | Researcher in Aquatic Microbial Ecotoxicology                 | Irstea                                                             | France                                                     |
| Bonnington, Rachel         | PhD Student, Developmental Neurobiology                       | University College London                                          | United Kingdom of Great Britain and Northern Ireland (the) |
| Bonnot, Nadège             | PhD in Ecology                                                | IRSTEA                                                             | France                                                     |
| Bonnot, Clemence           | Researcher in Plant biology                                   | INRA                                                               | France                                                     |
| Bonomi, Ernesto            | Director HPC for Energy & Environment                         | CRS4                                                               | Italy                                                      |
| Bonsdorff, Erik            | Professor of marine biology                                   | Åbo Akademi University                                             | Finland                                                    |
| Bontadina, Fabio           | Senior researcher, PhD                                        | SWILD - Urban Ecology & Wildlife Research                          | Switzerland                                                |
| Bontemps, Jean-Daniel      | Research director                                             | IGN                                                                | France                                                     |
| Bontemps, Sylvain          | Directeur de recherche, Astrophysics                          | CNRS, Laboratoire d'astrophysique de Bordeaux                      | France                                                     |
| Bonthoux, Sébastien        | Associate professor                                           | INSA Centre Val de Loire - UMR CITERES                             | France                                                     |
| Bontonou, Gwénaëlle        | Postdoc                                                       |                                                                    | Switzerland                                                |
| Bonvegna, Miryam           | Phd student                                                   | University of Turin                                                | Italy                                                      |
| Bony, sylvie               | senior research scientist                                     | INRAE                                                              | France                                                     |
| Bood, Nadia                | Climate Change Officer and Marine Scientist                   | World Wildlife Fund                                                | Belize                                                     |
| Boone, Aaron               | Resercher in Hydrology and Meteorology                        | CNRM Météo-France, CNRS                                            | France                                                     |
| Boone, Frédéric            | researcher in astrophysics                                    | IRAP - Observatoire Midi-Pyrénées - CNRS - Université Toulouse III | France                                                     |
| boonekamp, jelle           | Post-doctoral researcher ecophysiology (Marie-Curie fellow)   | University of Exeter                                               | United Kingdom of Great Britain and Northern Ireland (the) |
| Booth, Simon               | PhD Student in Biochemistry                                   | Newcastle University                                               | United Kingdom of Great Britain and Northern Ireland (the) |
| Booth, Adam                | Associate Professor in Applied Geophysics                     | University of Leeds                                                | United Kingdom of Great Britain and Northern Ireland (the) |
| Booth, Carey               | Biology                                                       | Reed College                                                       | United States of America (the)                             |
| Booth, Genevieve           | Medical Doctor (Paediatrics)                                  |                                                                    | United Kingdom of Great Britain and Northern Ireland (the) |
| Booth, Jamie               | Theoretical Physics                                           | RMIT University                                                    | Australia                                                  |
| Booth, David               | Marie Ecology                                                 | University of Technology Sydney                                    | Australia                                                  |
| Bopage, Malaka             | Asst. Manager., Field team and Community development          | The Rain forest ecolodge                                           | Sri Lanka                                                  |
| Bopp, Joshua               | scientific assistant in bioinformatics                        | University of Würzburg                                             | Germany                                                    |
| Boquete Seoane, M Teresa   | Postdoctoral Researcher                                       | EBD-CSIC                                                           | Spain                                                      |
| Borba, Gabriel             |                                                               | INPA                                                               | Brazil                                                     |
| Borchert, Amanda           | Biologist                                                     |                                                                    | United States of America (the)                             |
| Bordat, Frederic           | Mathematics                                                   | CNRS                                                               | France                                                     |

|                            |                                                                           |                                                                   |                                                            |
|----------------------------|---------------------------------------------------------------------------|-------------------------------------------------------------------|------------------------------------------------------------|
| Bordehore, Cesar           | Associate Professor Ecology                                               | University of Alicante                                            | Spain                                                      |
| Borden, Jesse              | Graduate Research Assistant in Ecology                                    | University of Florida                                             | United States of America (the)                             |
| Borderie, Fabien           | University teacher in Biology                                             | Université de Bourgogne Franche-Comté                             | France                                                     |
| Borderon, Marion           | Geography                                                                 | University of Vienna                                              | Austria                                                    |
| Bordeyne, François         | Post-doc                                                                  | Sorbonne Université                                               | France                                                     |
| Bordin, Luís Henrique      | PhD Student                                                               | Universidade Federal do Rio Grande                                | Brazil                                                     |
| Bordini, Allison           | Biology                                                                   | University of Florida                                             | United States of America (the)                             |
| Bordjan, Dejan             | Research assistant                                                        | University of Ljubljana, Biotechnical Faculty, Dept. for Forestry | Slovenia                                                   |
| Borger, Luca               | Professor - Chair in Ecology and Biodiversity                             | Swansea University                                                | United Kingdom of Great Britain and Northern Ireland (the) |
| Borges, Rebecca            | PhD researcher                                                            | ZMT                                                               | Germany                                                    |
| Borges, Rui                | Postdoc                                                                   | VetmeduniVienna                                                   | Austria                                                    |
| Borges de Amorim, Pablo    | Postdoctoral researcher, Impacts of Climate Change on the Water Resources | Federal University of Santa Catarina (UFSC)                       | Brazil                                                     |
| Borges Pedro, João Paulo   | Rural Sanitation Researcher                                               | Mamirauá Institute for Sustainable Development                    | Brazil                                                     |
| Boris, Fumanal             | Associate professor in Ecology                                            | Université Clermont Auvergne - UMR PIAF 547                       | France                                                     |
| Bork, Marcus               | PhD student, Soil Ecology and Hydrology                                   | University of Freiburg                                            | Germany                                                    |
| Borkent, Christopher       | Entomologist, Systematics                                                 |                                                                   | United States of America (the)                             |
| Borràs, Antoni             | Ornithology                                                               | Museu de Ciències Naturals de Barcelona                           | Spain                                                      |
| Borràs Calvo, Gabriel      | Biologist                                                                 | Catalan Office for Climate Change                                 | Andorra                                                    |
| Borras-Chavez, Renato      | Research Associated                                                       | CAPES- Pontificia Universidad Católica                            | Chile                                                      |
| Borregaard, Michael Krabbe | Associate Professor, Ecology/Biodiversity                                 | University of Copenhagen                                          | Denmark                                                    |
| Borrmann, Stephan          | University Professor/ Atmospheric Physics                                 | Johannes Gutenberg University                                     | Germany                                                    |
| Borsari, Bruno             | Professor of Biology (Emeritus)/Agroecology                               | Winona State University                                           | United States of America (the)                             |
| Bortone, Stephen           | Environmental Consultant                                                  | Osprey Aquatic Sciences, LLC                                      | United States of America (the)                             |
| Bosc, Alexandre            | Forest Ecophysiolgist                                                     | INRA                                                              | France                                                     |
| Bosc, Christopher          | Ecology                                                                   |                                                                   | France                                                     |
| Boscheinen, Jens           | PhD                                                                       | University of Neu-Ulm                                             | Germany                                                    |
| Bosco, Joseph              | Research Associate, Anthropology                                          | Washington University in St Louis                                 | United States of America (the)                             |
| Bose, Shroddha             | PhD Student                                                               | Freie Universitaet Berlin                                         | Germany                                                    |
| Bosques, Teresa            | Lecturer in Environmental Sciences                                        | UMDI- Facultad de Ciencias-Campus Juriquilla, UNAM                | Mexico                                                     |
| Böß, Tilmann               | IT network engineer / physics                                             |                                                                   | Germany                                                    |
| Bossart, Raphaël           | Lab technician                                                            | EAWAG                                                             | Switzerland                                                |
| Bosse, Mirte               | Postdoctoral researcher                                                   | Wageningen University & Research                                  | Netherlands (the)                                          |
| Bosson, Jean-Baptiste      | Glaciology - Geography                                                    | Conservatory of protected areas of Haute-Savoie, IUCN             | France                                                     |
| Bostelmann, Enrique        | Profesor Adjunto Ad Honorem                                               | Instituto de Ciencias de la Tierra, Universidad Austral de Chile  | Chile                                                      |
| Boston, Tony               | PhD student, Fenner School                                                | Australian National University                                    | Australia                                                  |
| Botero Trujillo, Ricardo   | Postdoctoral Researcher                                                   | American Museum of Natural History                                | United States of America (the)                             |

|                         |                                                                                    |                                                                                                                                                     |                                                            |
|-------------------------|------------------------------------------------------------------------------------|-----------------------------------------------------------------------------------------------------------------------------------------------------|------------------------------------------------------------|
| Botha, Hannes           | Herpetofauna Scientist                                                             | Mpumalanga Tourism and Parks Agency                                                                                                                 | South Africa                                               |
| Botha, Jenny            | Manager: People In Conservation Programme, Sustainable Development, Social Ecology | The Endangered Wildlife Trust                                                                                                                       | South Africa                                               |
| Botías, Cristina        | Research Fellow                                                                    | Instituto Regional de Investigación y Desarrollo Agroalimentario y Forestal de Castilla La Mancha (IRIAF), CIAPA de Marchamalo (Guadalajara, Spain) | Spain                                                      |
| Boto, Luis              | Researcher in Evolution                                                            | Museo Nacional de Ciencias Naturales. CSIC                                                                                                          | Spain                                                      |
| Botta-Dukát, Zoltan     | senior researcher                                                                  | MTA Centre for Ecological Research                                                                                                                  | Hungary                                                    |
| Bottero, Alexis         | Post-doc, ocean acoustics                                                          | Scripps Institution of Oceanography                                                                                                                 | United States of America (the)                             |
| Bottjer-Wilson, Daniela | Junior Specialist/Faculty Development & Oceanography                               | University of Hawai ‘i at Mānoa                                                                                                                     | United States of America (the)                             |
| Bou, Jordi              | Professor                                                                          | University of Girona                                                                                                                                | Spain                                                      |
| Bouarakia, Oussama      | PhD Researcher in Zoology and Genetics                                             | Faculty of Sciences, Mohammed V University in Rabat                                                                                                 | Morocco                                                    |
| Bouchara, BEJAOU        | Phd Student in public health and social psycholgy                                  | University of Lyon                                                                                                                                  | France                                                     |
| Bouchard, Colin         | Post-doctoral researcher                                                           | UMR Ecobiop, INRA, Univ Pau & Pays Adour                                                                                                            | United States of America (the)                             |
| Boucher, Jean           | Environmental Sociology                                                            | Arizona State University                                                                                                                            | Canada                                                     |
| Boucher, Olivier        | Climate scientist                                                                  | Institut Pierre-Simon Laplace                                                                                                                       | France                                                     |
| BOUCHER, Francois       | territory development                                                              | former CIRAD                                                                                                                                        | Mexico                                                     |
| Bouchet, francois       | Astrophysicist                                                                     | CNRS                                                                                                                                                | France                                                     |
| Bouchet, Freddy         | Climate scientist. Physicist.                                                      | CNRS and Ecole Normale Supérieure de Lyon                                                                                                           | France                                                     |
| Bouchet-Mayer, Cyriac   | PhD student in sociologie                                                          | Montpellier Univ.                                                                                                                                   | France                                                     |
| Bouchet-Valat, Milan    | Researcher in Sociology                                                            | French Institute for Demographic Studies (Ined)                                                                                                     | France                                                     |
| Bouckaert, Julie        | Senior Researcher                                                                  | CNRS                                                                                                                                                | France                                                     |
| Bouckaert, julie        | Senior Researcher                                                                  | Centre National de la Recherche Scientifique                                                                                                        | France                                                     |
| Boud, James             | Software Engineer/Computing and Mathematical Sciences                              | Meteorological Service of New Zealand Limited                                                                                                       | New Zealand                                                |
| Bouda, Martin           | Post-doctoral Fellow                                                               | Catholic University of Louvain                                                                                                                      | Czech Republic (the)                                       |
| BOUDSOCQ, François      | Researcher in Biology                                                              | CNRS                                                                                                                                                | France                                                     |
| Bouet, Jean-Yves        | Research Director at CNRS, Molecular Genetics and Microbiology                     | Centre National de la Recherche Scientifique                                                                                                        | France                                                     |
| Bouffard, Mathieu       | Postdoctoral researcher (CNRS) - geophysics                                        | IRPHE, Marseille                                                                                                                                    | France                                                     |
| Boufford, David         | Senior Research Scientist                                                          | Harvard University Herbaria                                                                                                                         | United States of America (the)                             |
| Bouldin, Erin           | Assistant Professor, Epidemiology                                                  | Appalachian State University                                                                                                                        | United States of America (the)                             |
| Bouldin, Courtney       | Assistant Professor of Biology                                                     | Appalachian State University                                                                                                                        | United States of America (the)                             |
| Boulding, Elizabeth     | Professor Integrative Biology                                                      | University of Guelph                                                                                                                                | Canada                                                     |
| BOULLIS, Antoine        | PhD in Entomology                                                                  |                                                                                                                                                     | France                                                     |
| Boulogne, François      | CNRS researcher (Soft condensed matter physics)                                    | Laboratoire de Physique des Solides, Université Paris Sud                                                                                           | France                                                     |
| Boulton, Rebecca        | Post-doctoral research fellow in Evolutionary Biology                              | University of Exeter                                                                                                                                | United Kingdom of Great Britain and Northern Ireland (the) |
| Bouma, Esther           | Researcher Human-Animal interactions (Social Sciences)                             | University of Groningen                                                                                                                             | Netherlands (the)                                          |

|                           |                                                                           |                                                                                    |                                                            |
|---------------------------|---------------------------------------------------------------------------|------------------------------------------------------------------------------------|------------------------------------------------------------|
| Bouman, Roderick          | PhD student, Evolutionary biology and plant systematics                   | Hortus botanicus Leiden                                                            | Netherlands (the)                                          |
| Bounas, Anastasios        | Biologist, Phd                                                            | University of Ioannina                                                             | Greece                                                     |
| Bouquet, Yaëlle           | Primatology                                                               | University of Neuchâtel                                                            | Switzerland                                                |
| Bouquet, Alexis           | Planetary Scientist                                                       |                                                                                    | France                                                     |
| Bourdon, Pierre-Antoine   | PhD                                                                       | Swansea University                                                                 | United Kingdom of Great Britain and Northern Ireland (the) |
| Bourg, Salomé             | PhD student in evolutionary biology                                       | LBBE- University of Lyon                                                           | France                                                     |
| Bourgatte, Guillaume      | Phd student in particle physics                                           | IPHC                                                                               | France                                                     |
| Bourgeois, Yann           | Research associate/Biology                                                |                                                                                    | United Arab Emirates (the)                                 |
| Bourgeois, Timothée       | Postdoctoral fellow, Oceanography                                         | Dalhousie University                                                               | Canada                                                     |
| Bourlat, Sarah            | Researcher, Biologist                                                     | Zoological Museum Alexander Koenig, Bonn                                           | Germany                                                    |
| Bourlès, Didier           | Professor                                                                 | Aix-Marseille University                                                           | France                                                     |
| Bourne, Amanda            | Biological Science                                                        | Fitzpatrick Institute for African Ornithology                                      | South Africa                                               |
| Bouruet-Aubertot, Pascale | Professor - Physical oceanography                                         | Sorbonne Université                                                                | France                                                     |
| Bousquet, Antoine         | Associate Professor                                                       | University of Pau                                                                  | France                                                     |
| Bousquet, Emma            | Satellite Image Processing Researcher                                     | CESBIO                                                                             | France                                                     |
| Bousquet, Julie           | Consultant in Ecotourism/Ecodevelopment                                   | Coop'Conseils                                                                      | France                                                     |
| Boussau, Bastien          | Researcher                                                                | CNRS, UMR 5558, Laboratoire de Biométrie et Biologie Evolutive, Université de Lyon | France                                                     |
| BOUTET, Agnès             | maitre de conferences                                                     | Sorbonne Université                                                                | France                                                     |
| BOUTILLIAT, ALEXIS        | biotechnology engineer                                                    | University of Lorraine                                                             | France                                                     |
| Bove, Claudia             | Professor                                                                 | Museu Nacional, Universidade Federal do Rio de Janeiro                             | Brazil                                                     |
| Bovo, Rafael              | Postdoctoral Research Fellow, Departamento de Fisiologia, IB, USP, Brazil | Universidade de Sao Paulo (USP), Brazil                                            | Brazil                                                     |
| Bowden, William B         | Professor of Watershed Science and Planning                               | University of Vermont                                                              | United States of America (the)                             |
| Bower, Amy                | Senior Scientist, Ocean Physics                                           | Woods Hole Oceanographic Institution                                               | United States of America (the)                             |
| Bowkett, Andrew           | Conservation Programmes Manager                                           | Wild Planet Trust                                                                  | United Kingdom of Great Britain and Northern Ireland (the) |
| Bowler, Jonathan          | Ornithologist (PhD)                                                       | Royal Society for the Protection of Birds                                          | United Kingdom of Great Britain and Northern Ireland (the) |
| Bowler, Karen             | Environmental Social Scientist                                            |                                                                                    | United Kingdom of Great Britain and Northern Ireland (the) |
| Bowring, Simon            | Researcher                                                                | LSCE                                                                               | France                                                     |
| Box, John                 | Retired ecologist & environmental manager                                 |                                                                                    | United Kingdom of Great Britain and Northern Ireland (the) |
| Boyadjian, Celia Helena   | Visiting Professor                                                        | Museu Nacional/Universidade Federal do Rio de Janeiro (UFRJ)                       | Brazil                                                     |
| Boyd, David R.            | Associate Professor of Law, Policy and Sustainability                     | University of British Columbia                                                     | Canada                                                     |
| Boyd, Bill                | Professor of Geography                                                    | Southern Cross University                                                          | Australia                                                  |
| Boyd-Wilson, Kirsty       | Scientist (Plant pathologist)                                             |                                                                                    | New Zealand                                                |

|                         |                                                              |                                                                        |                                                            |
|-------------------------|--------------------------------------------------------------|------------------------------------------------------------------------|------------------------------------------------------------|
| Boyer, Ronald           | Depth Psychologist and current Doctoral Student              | Graduate Theological Union & UC Berkeley                               | United States of America (the)                             |
| Boyer, Stéphane         | Professor in Ecology                                         | CNRS / Tours University                                                | France                                                     |
| Boyer, Bert             | Professor, Cardiometabolic disease research                  | Oregon Health & Science University                                     | United States of America (the)                             |
| Boyes, Mike             | Associate Professor, Outdoor Education                       | University of Otago                                                    | New Zealand                                                |
| Boyland, Natasha        | Fish Policy and Research Manager                             | Compassion in World Farming                                            | United Kingdom of Great Britain and Northern Ireland (the) |
| Boyle, Julie            | Translational Genetics Bioinformatics Analyst                | Huntsman Cancer Institute                                              | United States of America (the)                             |
| Boyle, Sarah            | Associate Professor                                          | Rhodes College                                                         | United States of America (the)                             |
| Boyle, Alice            | Associate Professor/Ecologist                                | Kansas State University                                                | United States of America (the)                             |
| Boyle, Leila            | Senior Tutor, Statistics                                     | University of Auckland                                                 | New Zealand                                                |
| Boyle, Ken              | Lecturer in Environmental Management                         | Technological University Dublin                                        | Ireland                                                    |
| Boyne, Jonathan         | Psychology                                                   |                                                                        | United States of America (the)                             |
| Bozem, Heiko            | Scientist                                                    | Johannes Gutenberg University Mainz, Institute for Atmospheric Physics | Germany                                                    |
| Bozeman, Bryan          | Integrative Conservationist                                  | University of Georgia                                                  | United States of America (the)                             |
| bozinovic, francisco    | phd                                                          | universidada catolica de chile                                         | Chile                                                      |
| Bozzi, Laura            | Lecturer                                                     | Yale University                                                        | United States of America (the)                             |
| Braby, Justine          | Climate Change, SLM, Zoology, Ecology                        | Progress Namibia                                                       | Namibia                                                    |
| Bracco, Gianangelo      | Associate Professor of Experimental Physics                  | Department of Physics - University of Genoa                            | Italy                                                      |
| Bracco, Jean-Pierre     | Professor of Prehistory                                      | Aix-Marseille University                                               | France                                                     |
| Brachet, Morgane        | Ph.D. student in Zoology                                     | University of Pretoria                                                 | South Africa                                               |
| Brack, Jeffrey          | Particle Astrophysics - retired                              | Colorado State University                                              | United States of America (the)                             |
| Brackzkowski, Alexander | Doctoral researcher - Environmental Science                  | University of Queensland                                               | South Africa                                               |
| Braddock, Kathryn       | Associate Scientist                                          | EcoAdapt                                                               | United States of America (the)                             |
| Bradley, Bethany        | Associate Professor of Biogeography                          | University of Massachusetts, Amherst                                   | United States of America (the)                             |
| Bradley, Paul           | Adjunct Assistant Professor                                  | University of San Diego                                                | United States of America (the)                             |
| Bradley, James          | Assistant Professor in Environmental Science                 | Queen Mary University of London                                        | United Kingdom of Great Britain and Northern Ireland (the) |
| Bradley, Georgienne     | Director, nonprofit conservation organization                | Sea Save Foundation                                                    | United States of America (the)                             |
| Bradshaw, Nicholas      | Assistant Professor / Biotechnology                          | University of Rijeka (Sveuciliste u Rijeci)                            | Croatia                                                    |
| Bradsworth, Nick        | PhD Candidate                                                | Deakin University                                                      | Australia                                                  |
| Brady, Daniel           | Researcher                                                   | University of Padua                                                    | Italy                                                      |
| Brakes, Philippa        | Research Fellow                                              | Whale and Dolphin Conservation                                         | United Kingdom of Great Britain and Northern Ireland (the) |
| Brambach, Fabian        | Postdoctoral researcher, Biodiversity                        | Georg-August-University Göttingen                                      | Germany                                                    |
| Brambilla, Mattia       | Research consultant in ecology and biodiversity conservation | Fondazione Lombardia per l'Ambiente                                    | Italy                                                      |
| Branca, Mathieu         | Assistant professor, Organic Chemistry                       | Université de Paris                                                    | France                                                     |
| Branch, George          | Professor of Marine Biology                                  | University of Cape Town                                                | South Africa                                               |
| Branch, Kristi          | Senior Research Scientist, sociology                         | Battelle Memorial Institute/Pacific Northwest National Laboratory      | United States of America (the)                             |
| Branchu, Priscilla      | Research associate                                           | INRA                                                                   | France                                                     |

|                                    |                                                       |                                                   |                                                            |
|------------------------------------|-------------------------------------------------------|---------------------------------------------------|------------------------------------------------------------|
| Branco, Manuela                    | Professor Entomology                                  | University of Lisbon                              | Portugal                                                   |
| Branco de Oliveira Wanderley, Theo | B.Sc and Master Degree Student                        | Federal Rural University of Pernambuco            | Brazil                                                     |
| Brand, Charlotte                   | Biosciences Research Associate                        | University of Exeter                              | United Kingdom of Great Britain and Northern Ireland (the) |
| Brand Correa, Lina                 | Research Fellow                                       | University of Leeds                               | United Kingdom of Great Britain and Northern Ireland (the) |
| Brandão, Reuber                    | Associate Professor - Animal Ecology and Conservation | University of Brasília                            | Brazil                                                     |
| Brandimarte, Ana                   | Professor - Ecology                                   | University of Sao Paulo                           | Brazil                                                     |
| Brändström, Johan                  | PhD Circular Economy                                  | Environmental Engineering                         | Sweden                                                     |
| Brandt, Kasper                     | PhD candidate                                         | Swansea University                                | United Kingdom of Great Britain and Northern Ireland (the) |
| Brandt, Renata                     | Evolutionary Biologist and Science Communicator       | Laurentian University                             | Canada                                                     |
| Brandt, Alexander                  | Evolutionary Biology                                  | JF Blumenbach Institute Goettingen                | Germany                                                    |
| Branger, Hubert                    | Researcher                                            | CNRS                                              | France                                                     |
| Branquinho, Cristina               | Professor of Ecology                                  | Faculdade de Ciências da Universidade de Lisboa   | Portugal                                                   |
| Bras, Nicolas                      | Phd student                                           | Lorraine University                               | France                                                     |
| Bras, Audrey                       | Ecology                                               | inra                                              | France                                                     |
| BRAS-GONCALVES, Rachel             | scientist                                             | IRD                                               | France                                                     |
| BRASCHI, Julie                     | PhD student                                           | IMBE                                              | France                                                     |
| Brassine, Mathilde                 | Zoology MSc                                           | Rhodes University                                 | South Africa                                               |
| Brassine, Alienor                  | Zoology and Ecology                                   | Rhodes University                                 | South Africa                                               |
| Brau-Nogué, Sylvie                 | Research Engineer / Software                          | CNRS                                              | France                                                     |
| Braud, Isabelle                    | Senior researcher                                     | Irstea                                            | France                                                     |
| Brauer, Anthony                    | Systems Science                                       | Independent                                       | United Kingdom of Great Britain and Northern Ireland (the) |
| Braun, Hans-Peter                  | Professor for Plant Genetics, Head of Department      | Leibniz Universität Hannover                      | Germany                                                    |
| Bravo, Adriana                     | CLTA Assistant Professor, Teaching Stream             | University of Toronto                             | Canada                                                     |
| Bravo, Felipe                      | Professor of Forest Management                        | iuFOR, Universidad de Valladolid                  | Spain                                                      |
| Bravo, Giangiacomo                 | Professor                                             | Linnaeus University                               | Sweden                                                     |
| Bravo Anaya, Lourdes Mónica        | Dr. physical chemistry                                | Université Grenoble Alpes                         | France                                                     |
| Bray, Tim                          | Lecturer in Conservation Biology                      | Bristol Zoological Society                        | United Kingdom of Great Britain and Northern Ireland (the) |
| Bray, David                        | Professor                                             | Florida International University                  | United States of America (the)                             |
| Brayne, Kitty                      | Community based marine conservation - project manager | Blue Ventures                                     | United Kingdom of Great Britain and Northern Ireland (the) |
| Brayshaw, Drew                     | Senior Hydrologist and Geoscientist                   | Statlu Environmental Consulting Ltd.              | Canada                                                     |
| Braz, Alan                         | PhD candidate in ecology                              | Universidade Federal do Rio de Janeiro            | Brazil                                                     |
| Braz, Henrique                     | Postdoctoral Fellow/Zoology                           | Instituto Butantan                                | Brazil                                                     |
| Brazier, Anna                      | Researcher MSc Sustainable Development                | Research Advocacy Unit                            | Zimbabwe                                                   |
| Breadsell, Jess                    | Researcher                                            | Curtin University sustainability policy institute | Australia                                                  |
| Brede, Benjamin                    | Postdoc in Remote Sensing                             | Wageningen University & Research                  | Netherlands (the)                                          |

|                       |                                                            |                                                        |                                                            |
|-----------------------|------------------------------------------------------------|--------------------------------------------------------|------------------------------------------------------------|
| Bredski, Joanna       | Consultant Psychiatrist                                    | NHS                                                    | United Kingdom of Great Britain and Northern Ireland (the) |
| Breed, Andrew         | Veterinary Epidemiology                                    | University of Queensland                               | Australia                                                  |
| Breed, Martin         | Lecturer (Ecology)                                         | Flinders University                                    | Australia                                                  |
| Breed, Bill           | Emerits Professor                                          | University of Adelaide                                 | Australia                                                  |
| Breitenmoser, Urs     | Senior scientist, ecologist                                | Univ. Bern                                             | Switzerland                                                |
| Brenard, Nathalie     | PhD student, biology                                       | University of Antwerp                                  | Belgium                                                    |
| Brendel, Heiko        | Senior Lecturer (Digital Humanities/Military History)      | University of Passau                                   | Germany                                                    |
| Brendel, Kilian       | Physics                                                    | Freiburg University                                    | Germany                                                    |
| Brendel, Oliver       | Scientist / Plant Ecophysiology                            | INRA                                                   | France                                                     |
| Brendel, Esther       | Biology and Psychology                                     | Johannes Gutenberg Universität Mainz                   | Germany                                                    |
| Brennan, David        | Virologist                                                 | AgriFood and Biosciences Institute                     | United Kingdom of Great Britain and Northern Ireland (the) |
| Brennan, Peter        | Academic Director, Sustainability and Environmental Action | SIT Study Abroad,                                      | Australia                                                  |
| Brenowitz, Eliot      | Professor of Biology                                       | University of Washington                               | United States of America (the)                             |
| Brent, Linda          | Executive Director                                         | Parsemus Foundation                                    | United States of America (the)                             |
| Brentner, Laura       | PhD, Environmental Science                                 | Loyola University Chicago                              | United States of America (the)                             |
| Bretagnolle, Vincent  | Scientist                                                  | CNRS                                                   | France                                                     |
| BRETAGNOLLE, François | Professor of ecology                                       | University                                             | France                                                     |
| Breton, Florentin     | PhD student                                                | LSCE (IPSL)                                            | France                                                     |
| Breton, Catherine     | Researcher Data Scientist Bioinformatic and evolution      | Bioversity                                             | France                                                     |
| Bretscher, Anthony    | Professor, Molecular Biology and Genetics                  | Cornell University                                     | United States of America (the)                             |
| Breuer, Lutz          | Prof. for Landscape, Water and Biogeochemical Cycles       | Justus Liebig University Giessen                       | Germany                                                    |
| Breunig, Peter        | Professor                                                  | Weihenstephan-Triesdorf University of Applied Sciences | Germany                                                    |
| Breure, Abraham       | Research Associate                                         | Naturalis Biodiversity Center Leiden                   | Netherlands (the)                                          |
| Breure, Timo          | Doctoral student                                           | Rothamsted Research                                    | United Kingdom of Great Britain and Northern Ireland (the) |
| BREUZARD, Jeremy      | Organic Chemistry Teacher                                  | CPE Lyon                                               | France                                                     |
| Brewis, Catherine     | Primate conservation                                       | Oxford Brookes university                              | United Kingdom of Great Britain and Northern Ireland (the) |
| Breyton, Cécile       | Research Director / Biology                                | CNRS                                                   | France                                                     |
| Briatte, François     | Assistant Lecturer in Political Science                    | ESPOL Lille & Sciences Po                              | France                                                     |
| Brice, Justin         | GIS Analyst/Wildlife Biologist                             | Conservation Biology Institute                         | United States of America (the)                             |
| Briens, François      | Socio-ecological economist and energy analyst              |                                                        | France                                                     |
| Briers, Rob           | Head of Life Sciences                                      | Edinburgh Napier University                            | United Kingdom of Great Britain and Northern Ireland (the) |
| Brilli, Ylenia        | Postdoc in Economics                                       | University of Verona                                   | Italy                                                      |
| Brinker, Pina         | PhD                                                        | University of Groningen                                | Netherlands (the)                                          |
| Brinker, Alexander    | Fish biology                                               | Fisheries Research Station                             | Germany                                                    |
| Brinkhoff, Rose       | PhD student, Plant ecology                                 | University of Tasmania                                 | Australia                                                  |

|                            |                                                                             |                                                                 |                                                            |
|----------------------------|-----------------------------------------------------------------------------|-----------------------------------------------------------------|------------------------------------------------------------|
| Briones, Maria J. I.       | Professor of Zoology                                                        | Universidad de Vigo                                             | Spain                                                      |
| Briottet, Xavier           | Director of Research                                                        | ONERA                                                           | France                                                     |
| Brisola Constantino, Pedro | PhD. Student                                                                | IB-USP                                                          | Brazil                                                     |
| Brisse, Sylvain            | Research Director                                                           | Institut Pasteur                                                | France                                                     |
| Bristow, Keith             | Senior Principal Research Scientist                                         | CSIRO                                                           | Australia                                                  |
| Bristow, David             | Retired. Graduate in mathematics and psychology                             |                                                                 | United Kingdom of Great Britain and Northern Ireland (the) |
| Brito, Jose A.             | Research Fellow                                                             | ITQB NOVA                                                       | Portugal                                                   |
| Brito, José Carlos         | Principal researcher / Biological sciences                                  | CIBIO/InBIO, University of Porto                                | Portugal                                                   |
| Britto, Marcelo            | Professor                                                                   | Museu Nacional, Universidade Federal do Rio de Janeiro          | Brazil                                                     |
| Britton, Jess              | Research Fellow                                                             | University of Exeter                                            | United Kingdom of Great Britain and Northern Ireland (the) |
| Britton, Sébastien         | Research Associate in Cancer research                                       | CNRS                                                            | France                                                     |
| Britton, Damon             | PhD candidate                                                               | University of Tasmania                                          | Australia                                                  |
| Brivio, Francesca          | PostDoc                                                                     | University of Sassari                                           | Italy                                                      |
| Brix, Holger               | Senior Researcher                                                           | Institute of Coastal Research, Helmholtz-Zentrum Geesthacht     | Germany                                                    |
| Briz, Victor               | Postdoctoral researcher                                                     | CSIC                                                            | Spain                                                      |
| Broadhurst, Thomas         | Professor of Astrophysics                                                   | Ikerbasque Foundation, The Basque Country                       | Spain                                                      |
| Broadwater, Bo             | Physics                                                                     | Uppsala University                                              | Sweden                                                     |
| Broady, Paul               | Lecturer / researcher retired                                               | University of Canterbury                                        | New Zealand                                                |
| Brochet, Silvia            | PhD student                                                                 | University of Lausanne                                          | Switzerland                                                |
| Brock, Olaf                | Soil Chemistry (PhD)                                                        | University of Amsterdam (IBED)                                  | Netherlands (the)                                          |
| Brocklehurst, Martin       | Waste & Resource Management; Environmental Science;Energy & Citizen Science | Independent Environmental Consultant - KempleyGreen Consultants | United Kingdom of Great Britain and Northern Ireland (the) |
| Brodeur, Jacques           | Professor                                                                   | Université de Montréal                                          | Canada                                                     |
| Brodeur, Julie             | Researcher Environmental Toxicology                                         | CONICET                                                         | Argentina                                                  |
| Brodie, Jon                | Environmental science                                                       | James Cook University                                           | Australia                                                  |
| Brodman, Robert            | Biology Professor                                                           | Buena Vista University                                          | United States of America (the)                             |
| Broekaert, Paul            | Professor                                                                   | ULB                                                             | Belgium                                                    |
| Broennimann, Olivier       | Scientific Staff                                                            | University of Lausanne                                          | Switzerland                                                |
| Brogna, Patricia           | Ciencias sociales                                                           | UNAM                                                            | Mexico                                                     |
| Brogniez, Helene           | Associate Professor / Physics of Climate                                    | LATMOS / University Paris-Saclay                                | France                                                     |
| Brokaw, Nick               | Professor, forest ecology                                                   | Uiversity of Puerto Rico                                        | Puerto Rico                                                |
| Brokaw, Nicholas           | Professor (retired)                                                         | University of Puerto Rico-Rio Piedras                           | Puerto Rico                                                |
| Bromberg, Elke             | Professor and Researcher (Phisiology)                                       | Pontifical Catholic University of Rio Grande do Sul             | Brazil                                                     |
| Bromer, William            | Professor of Biology and Environmental Science                              | University of St. Francis                                       | United States of America (the)                             |
| Bronner, Gary              | Academic & Researcher (Mammalogy)                                           | University of Cape Town                                         | South Africa                                               |
| Brooke, Sandra             | Research Faculty III                                                        | Florida State University                                        | United States of America (the)                             |
| Brooker, Stuart            | PhD Student in Ecology                                                      | Durham University                                               | United Kingdom of Great Britain and Northern Ireland (the) |

|                            |                                                                |                                                                                 |                                                            |
|----------------------------|----------------------------------------------------------------|---------------------------------------------------------------------------------|------------------------------------------------------------|
| Brookes, Lola              | PhD candiate                                                   | Zoological Society of London                                                    | United Kingdom of Great Britain and Northern Ireland (the) |
| Brooks, Robert             | Professor Emeritus of Geography and Ecology                    | Pennsylvania State University                                                   | United States of America (the)                             |
| Brooks, Jeremy             | Stream Ecology, PhD Student                                    | Idaho State University                                                          | United States of America (the)                             |
| Brooks, Daniel             | Climate change and emerging diseases specialist                | University of Nebraska                                                          | United States of America (the)                             |
| Brooks, Kevin              | Associate Professor, Psychology                                | Macquarie University                                                            | Australia                                                  |
| BROSSE, Sebastien          | Professor of Ecology                                           | University Paul Sabatier, Toulouse                                              | France                                                     |
| Brost, Mascha              | Research assistant                                             | DLR                                                                             | Germany                                                    |
| Brothers, Denis            | Professor Emeritus, Entomology                                 | University of KwaZulu-Natal                                                     | South Africa                                               |
| Brotos, Lluís              | Senior Researcher                                              | CSIC at InForest JRU (CREAF-CTFC)                                               | Spain                                                      |
| Brouat, Carine             | Evolutionary Ecology                                           | IRD                                                                             | France                                                     |
| Brouwer, Stijn             | Senior researcher                                              | KWR Water Research Institute                                                    | Netherlands (the)                                          |
| Brown, Shae                | PhD Researcher, School of Environment, Science and Engineering | Southern Cross University                                                       | Australia                                                  |
| Brown, Virginia            | Ecologist                                                      |                                                                                 | United States of America (the)                             |
| Brown, B. Ricardo          | Prof. Social Science and Sociology                             | Pratt institute                                                                 | United States of America (the)                             |
| Brown, Christopher         | CEO                                                            | Namibian Chamber of Environment (representing 65 environmental NGOs in Namibia) | Namibia                                                    |
| Brown, Sally               |                                                                | Bournemouth University                                                          | United Kingdom of Great Britain and Northern Ireland (the) |
| Brown, Gregory             | Oceanographer (retired)                                        | Global marine survey company                                                    | United Kingdom of Great Britain and Northern Ireland (the) |
| Brown, Beverly             | Professor Emerita/Ecology                                      |                                                                                 | United States of America (the)                             |
| Brown, Wendy               | Research Technician                                            | The Rocky Mountain Biological Laboratory                                        | United States of America (the)                             |
| Brown, Katrina             | Senior Researcher                                              | James Hutton Institute                                                          | United Kingdom of Great Britain and Northern Ireland (the) |
| Brown, Derek               | Honorary Senior Lecturer                                       | University of Glasgow                                                           | United Kingdom of Great Britain and Northern Ireland (the) |
| Brown Sevilla, Samantha    | Astronomy                                                      | MPIA                                                                            | Germany                                                    |
| Bruce, Amy                 | PhD Candidate, Molecular & Cell Biology                        | University of Cape Town                                                         | South Africa                                               |
| Bruce, Robyn               | MSc Primate Conservation                                       | Miss                                                                            | United Kingdom of Great Britain and Northern Ireland (the) |
| Brüderlin, Luca            | Intern in Water Remote Sensing                                 | ETH EAWAG                                                                       | Switzerland                                                |
| Bruendl, Aisha             | PhD student                                                    | University of Exeter                                                            | United Kingdom of Great Britain and Northern Ireland (the) |
| Brugger, Bastien           | Research associate, Astrophysics                               | Cornell University                                                              | United States of America (the)                             |
| Brugger, Keith             | Professor, Glaciology and Quaternary Geology                   | University of Minnesota, Morris                                                 | United States of America (the)                             |
| Brugger, Paula             | Professor                                                      | UFSC                                                                            | Brazil                                                     |
| Brügger, Paula             | Coordinator of the Ecological Justice Observatory              | Federal University of Santa Catarina                                            | Brazil                                                     |
| Brüggmann Dr. med., Ludwig | Clinical director, retreated                                   |                                                                                 | Germany                                                    |
| Bruins, Jorick             | PhD Chemistry                                                  | Wageningen University and Research                                              | Netherlands (the)                                          |
| Brumm, Henrik              | Behavioural Biology                                            | Max Planck Institute for Ornithology                                            | Germany                                                    |

|                         |                                                                            |                                                            |                                                            |
|-------------------------|----------------------------------------------------------------------------|------------------------------------------------------------|------------------------------------------------------------|
| Brumsack, Hans          | Prof. Dr. / Microbiogeochemistry                                           | ICBM Oldenburg University                                  | Germany                                                    |
| BRUN, Frederic          | Environnemental engineer                                                   |                                                            | France                                                     |
| Brunberg, Anna-Kristina | Associate Professor, Limnology                                             | Uppsala University                                         | Sweden                                                     |
| Brunel, Caroline        | Microbial Ecology                                                          | Taizhou University                                         | China                                                      |
| brunet, pascal          | ingeneer hydrology                                                         | cnrs                                                       | France                                                     |
| Brunet, Magali          | Research scientist in Materials Science                                    | CNRS                                                       | France                                                     |
| Bruni, Margherita       | Biotechnologist                                                            | IEO                                                        | Italy                                                      |
| Brüniche-Olsen, Anna    | Research Scientist                                                         | Purdue University                                          | United States of America (the)                             |
| Brunk, Micha            |                                                                            | Leibniz-Institut für Neurobiologie                         | Germany                                                    |
| Brunner, Beat           | Renewable energy, Climate plans co-author, IPCC SR15 & AR6 expert reviewer | Independent scientist, previously EPFL Lausanne            | Switzerland                                                |
| Bruno, ROMAGNY          | Economist, research director                                               | Institut de Recherche pour le Développement (IRD)          | France                                                     |
| Bruno, Daniel           | Postdoc researcher/Ecology                                                 | Instituto Pirenaico de Ecología (IPE-CSIC)                 | Spain                                                      |
| Bruno, Davide           | Senior Lecturer in Psychology                                              | Liverpool John Moores University                           | United Kingdom of Great Britain and Northern Ireland (the) |
| Brush, Erik             | Zoology PhD Candidate                                                      | University of Hawaii                                       | United States of America (the)                             |
| Bruskotter, Jeremy      | Professor                                                                  | The Ohio State University                                  | United States of America (the)                             |
| Brüwer, Jan David       | PhD Student                                                                | Max Planck Institute for Marine Microbiology               | Germany                                                    |
| Bryan, Brett            | Alfred Deakin Professor of Global Change, Environment, and Society         | Deakin University                                          | Australia                                                  |
| Bryant, Rosemarie       | Anthropology                                                               |                                                            | United Kingdom of Great Britain and Northern Ireland (the) |
| Bryl, Łukasz            | PhD student (reclamation of water reservoirs)                              | Faculty of Chemistry, Adam Mickiewicz University in Poznan | Poland                                                     |
| Bryson-Morrison, Nicola | Primatologist, Researcher Ecology & Conservation                           | University if Kent                                         | United Kingdom of Great Britain and Northern Ireland (the) |
| Buatier, Martine        | Professor in Geology                                                       | Université Bourgogne Franche Comté                         | France                                                     |
| Bubadué, Jamile         | PhD student in Zoology                                                     | Universidade Federal de Santa Maria                        | Brazil                                                     |
| Bucak, Tuba             | Conservation GIS and Modeling Expert, PhD                                  | DKM                                                        | Turkey                                                     |
| Buchanan, Mark          | Author and Science Writer                                                  |                                                            | United Kingdom of Great Britain and Northern Ireland (the) |
| Buchanan, Kate          | Professor                                                                  | Deakin University                                          | Australia                                                  |
| Buchanan, Scott         | Herpetologist                                                              | RIDEM Fish and Wildlife                                    | United States of America (the)                             |
| Buchanan, Peter         | Mycologist; Science Team Leader                                            | Manaaki Whenua - Landcare Research                         | New Zealand                                                |
| Buchanan-Smith, Hannah  | Professor, Psychology                                                      | University of Stirling                                     | United Kingdom of Great Britain and Northern Ireland (the) |
| Buchholz, Lech          | PhD in nature conservation and entomology                                  | Holy Cross National Park                                   | Poland                                                     |
| Buchholz, Saskia        | Urban Climate Research                                                     |                                                            | Germany                                                    |
| Buchmueller, Juri       | PhD student in Data Analysis and Visualization                             | University of Konstanz                                     | Germany                                                    |
| Buck, Julia             | Assistant professor, biology                                               | UNC Wilmington                                             | United States of America (the)                             |
| Buck, Laura             | Postdoctoral Researcher                                                    | University of California Davis                             | United States of America (the)                             |
| Buckland, Philip        | Environmental Archaeologist                                                | Umeå University                                            | Sweden                                                     |

|                                       |                                                      |                                                                            |                                                            |
|---------------------------------------|------------------------------------------------------|----------------------------------------------------------------------------|------------------------------------------------------------|
| Buckland, Paul                        | Entomologist                                         |                                                                            | United Kingdom of Great Britain and Northern Ireland (the) |
| Buckley, Hannah                       | Associate Professor of Ecology                       | Auckland University of Technology                                          | New Zealand                                                |
| Buckley, Heather                      | Assistant Professor of Civil Engineering             | University of Victoria                                                     | Canada                                                     |
| Buckley, James                        | Postdoctoral researcher                              | ETH Zurich                                                                 | Switzerland                                                |
| Buckley, Graham                       | Prosthetist                                          |                                                                            | Ireland                                                    |
| Buckup, Paulo                         | Professor, Zoology                                   | Universidade Federal do Rio de Janeiro, Museu Nacional                     | Brazil                                                     |
| Budde, Katharina                      | Postdoc in forest genetics                           | INRA - French National Institute for Agricultural Research                 | France                                                     |
| Budde, Michael                        | Senior Scientist in Clinical Research                | Biostatistics F.Hoffmann-La Roche ltd.                                     | Germany                                                    |
| Budzicz, Łukasz                       | adjunct / psychology                                 | University of Zielona Gora                                                 | Poland                                                     |
| Buendia-Fores, Cristina               | Aquatic Scientist                                    | AEP                                                                        | Spain                                                      |
| Bueno, David                          | Chair in Neuroeducation UB-EDU1ST                    | University of Barcelona                                                    | Spain                                                      |
| Bueno Villafañe, Diego                | Biologist                                            | Instituto de Investigación Biológica del Paraguay                          | Paraguay                                                   |
| Büermann, Andrea                      | Landscape Ecology                                    | Helmholtz Centre for Environmental Research - UFZ                          | Germany                                                    |
| Buettner, Alexander                   | Scientist Quality Control and Analytical Development | Roche                                                                      | Germany                                                    |
| Buettner, Christin                    | PhD Student                                          | Chemnitz University of Technology                                          | Germany                                                    |
| Buff, Xavier                          | Professor of Mathematics                             | Université Toulouse III - Paul Sabatier                                    | France                                                     |
| BUGABANDA, NABINTU                    | Researcher                                           | the hydrobiology research centre                                           | Congo (the Democratic Republic of the)                     |
| Bugli, Matteo                         | Post-Doc researcher in Astrophysics                  | CEA/DRF/IRFU, Astrophysics department, Paris Saclay University             | France                                                     |
| Bugoni, Leandro                       | Professor                                            | Universidade Federal do Rio Grande - FURG                                  | Brazil                                                     |
| Buhle, Eric                           | Ecology                                              | Biomark / NOAA Fisheries                                                   | United States of America (the)                             |
| Buisson, Elise                        | Assoc. Pr / Ecology                                  | IMBE / Avignon Université                                                  | France                                                     |
| Buisson, Laetitia                     | Associate Professor                                  | Université Toulouse 3                                                      | France                                                     |
| Buitenhuis, Erik                      | ocean biogeochemistry (including greenhouse gases)   | University of East Anglia                                                  | United Kingdom of Great Britain and Northern Ireland (the) |
| Buitrago Aristizábal, María Alejandra | Botanist                                             | Unicamp                                                                    | Brazil                                                     |
| Bukejs, Andris                        | Dr.                                                  | Daugavpils University                                                      | Latvia                                                     |
| Bulgarella, Mariana                   | Research Fellow                                      | Victoria University of Wellington                                          | New Zealand                                                |
| Bulgarelli, Barbara                   | Senior Scientist                                     | JRC - EC                                                                   | Italy                                                      |
| Bulgheresi, Silvia                    | Assistant Professor Environmental Cell Biology       | University of Vienna                                                       | Austria                                                    |
| Bulkan, Janette                       | Associate Professor of Indigenous Forestry           | University of British Columbia                                             | Canada                                                     |
| Bulla, Martin                         | Postdoc in ecology, biorhythms and ornithology       | Max Planck Institute for Ornithology and Czech University of Life Sciences | Germany                                                    |
| Bulmer, M H                           | Director                                             | Roedown Research R2                                                        | United States of America (the)                             |
| Bultheel, Clément                     | Green Finance Officer                                | Ministry for the Ecological and Inclusive Transition                       | France                                                     |
| Buma, Brian                           | Assistant Professor                                  | University of Colorado, Denver                                             | United States of America (the)                             |

|                              |                                                                            |                                                              |                                                            |
|------------------------------|----------------------------------------------------------------------------|--------------------------------------------------------------|------------------------------------------------------------|
| Bundock, Aaron               | Research Associate, Physics                                                | Imperial College London                                      | United Kingdom of Great Britain and Northern Ireland (the) |
| Büneker, Henrique            |                                                                            | Universidade Federal do Rio Grande do Sul                    | Brazil                                                     |
| Bungard, Michael             | PhD researcher                                                             | University of York                                           | United Kingdom of Great Britain and Northern Ireland (the) |
| Bünger, Mariana              |                                                                            | University of Ceará                                          | Brazil                                                     |
| Bunsy, Yogishah              | PhD candidate                                                              | University of Mauritius                                      | Mauritius                                                  |
| Bunter, Kim                  | Phd - Genetics                                                             | University of New England                                    | Australia                                                  |
| buoncristiani, jean francois | Geologist                                                                  | University of Burgundy                                       | France                                                     |
| Buoro, Mathieu               | Research scientist - Ecology Evolution                                     | INRA ECOBIOP                                                 | France                                                     |
| Buotte, Polly                | Ecosystem Modeling                                                         | University of California, Berkeley                           | United States of America (the)                             |
| Burch, Hayden                | Medical Student and researcher                                             | University of Melbourne                                      | Australia                                                  |
| burel, Françoise             | ecology                                                                    | CNRS                                                         | France                                                     |
| Burella, Pamela              | Phd                                                                        | Universidad Nacional del Litoral                             | Argentina                                                  |
| Burfield, Ian                | Global Science Coordinator (Species)                                       | BirdLife International                                       | United Kingdom of Great Britain and Northern Ireland (the) |
| Bürger, Patrick              | Doctoral researcher in Process Engineering                                 | BTU Cottbus-Senftenberg                                      | Germany                                                    |
| Burgess, George              | Director Emeritus, Florida Program for Shark Research                      | University of Florida                                        | United States of America (the)                             |
| Burghardt, Gordon            | Professor of Ecology & Evolutionary Biology and Psychology                 | University of Tennessee                                      | United States of America (the)                             |
| Burgo Braga, Ricardo         | Geographer, MSc                                                            | INNTI Environmental Consultants                              | Brazil                                                     |
| BURGUET, MARIA               | ASSOCIATE LECTURER                                                         | University of Valencia                                       | Spain                                                      |
| Burhenne, Luisa              | Climate Change Mitigation and Renewable Energy                             | University of British Columbia                               | Canada                                                     |
| Buria, Leonardo              | Doctor en Biología                                                         | Administración de Parques Nacionales                         | Argentina                                                  |
| Burk, Courtney               | MSC Wildlife Connectivity                                                  | University of New Brunswick                                  | Canada                                                     |
| Burke, Rory                  | PhD Researcher                                                             | University College Dublin                                    | Ireland                                                    |
| Burke, Thomas                | Postdoc, molecular and cell biology                                        | University of California, Berkeley                           | United States of America (the)                             |
| Burkey, Tormod V.            | Visiting Scientist                                                         | University of Oslo                                           | Norway                                                     |
| BURLACU, GEORGE              | DESIGN ENGINEER                                                            | GVA LIGHTING INC.                                            | Canada                                                     |
| Burmeister, Wim              | Professor                                                                  | Univ. Grenoble Alpes                                         | France                                                     |
| Burn, Adam                   | Plant Science                                                              | SCU Lismore                                                  | Australia                                                  |
| Burnett, Alexandra           | Behavioral Ecology                                                         | University of Arizona                                        | United States of America (the)                             |
| Burnett, Kelly               | Aquatic Ecologist                                                          |                                                              | United States of America (the)                             |
| Burnham, Robyn               | Associate Curator Emerita, Herbarium                                       | University of Michigan                                       | United States of America (the)                             |
| Burnham, Theresa             | PhD Candidate in Marine Ecology                                            | San Diego State University & University of California, Davis | United States of America (the)                             |
| Burns, David                 | Postdoctoral Research Associate                                            | Newcastle University                                         | United Kingdom of Great Britain and Northern Ireland (the) |
| Burnside, Beth               | Professor of Molecular & Cell Biology, Vice Chancellor for Research Emeria | University of California, Berkeley                           | United States of America (the)                             |
| Burquez, Alberto             | Researcher                                                                 | Universidad Nacional Autonoma de Mexico                      | Mexico                                                     |
| Burri, Reto                  | Biologist                                                                  |                                                              | Germany                                                    |

|                        |                                                                      |                                                       |                                                            |
|------------------------|----------------------------------------------------------------------|-------------------------------------------------------|------------------------------------------------------------|
| Burslem, Alec          | PhD Student; Marine Physiology                                       | The University of St Andrews                          | United Kingdom of Great Britain and Northern Ireland (the) |
| BURST, Maxime          | Postdoctoral Researcher - Vegetation Science                         | CNRS                                                  | France                                                     |
| Burt, April            | Marine Science                                                       | Oxford University                                     | United Kingdom of Great Britain and Northern Ireland (the) |
| Burte, Julien          | Researcher                                                           | CIRAD                                                 | France                                                     |
| Burton, Frederic       | Conservation Biologist                                               | Cayman Islands Department of Environment              | Cayman Islands (the)                                       |
| Burton, Alice          | Research Fellow                                                      | University College London                             | United Kingdom of Great Britain and Northern Ireland (the) |
| Burton, Philip         | Professor                                                            | University of Northern British Columbia               | Canada                                                     |
| Burvingt, Olivier      | Coastal Dynamics Scientist                                           | University of Plymouth                                | United Kingdom of Great Britain and Northern Ireland (the) |
| Busack, Stephen        | Emeritus Director, Research and Collections                          | North Carolina Museum of Natural Sciences             | United States of America (the)                             |
| Buscardo, Erika        | Ecology                                                              | University of Brasilia                                | Brazil                                                     |
| Buschke, Falko         | Senior lecturer in Macroecology and Conservation Biology             | University of the Free State                          | South Africa                                               |
| Bush, Mark             | Professor of Biology                                                 | Florida Institute of Technology                       | United States of America (the)                             |
| Bush, Melanie E L      | Associate Professor                                                  | Adelphi University                                    | United States of America (the)                             |
| Busón, Carlos          | Pesquisador post doctoral en desenvolvimiento regional. PPGDRS-CAPES | Universidade Estadual de Mato Grosso do Sul (UEMS)    | Brazil                                                     |
| Bussi, Claudio         | Postdoc Researcher                                                   | The Francis Crick Institute                           | United Kingdom of Great Britain and Northern Ireland (the) |
| Bustamante, Mercedes   |                                                                      | University of Brasília                                | Brazil                                                     |
| BUSTAMANTE, Paco       | Professor of Ecotoxicology                                           | university of La Rochelle                             | France                                                     |
| Butcher, Sarah         | Professor, Microbiology                                              | University of Helsinki                                | Finland                                                    |
| Butler, Phillip        | Senior Engineer, Solar PV development                                | Oxford PV                                             | United Kingdom of Great Britain and Northern Ireland (the) |
| Butler, Brett          | Doctoral Student of Evolutionary Biology                             | Universidad Nacional Autonoma de Mexico               | Mexico                                                     |
| Butler, Colin          | Honorary Professor; Epidemiology and Public Health                   | Australian National University                        | Australia                                                  |
| Butler, Paul           | Honorary Senior Research Lecturer                                    | University of Exeter                                  | United Kingdom of Great Britain and Northern Ireland (the) |
| Butler, Dr. Reginald   | PhD Marine Biology / Ecology                                         | Memorial University of Newfoundland                   | Canada                                                     |
| Butler, Wayne          | Chief Medical Physicist                                              | Wheeling Hospital, Schiffler Cancer Center            | United States of America (the)                             |
| Butler, Christopher    | PhD Geology                                                          | University of Durham, UK. Ex-oil industry.            | United Kingdom of Great Britain and Northern Ireland (the) |
| Butt, Nathalie         | Research Fellow                                                      | The University of Queensland                          | Australia                                                  |
| Buttiglieri, Gianluigi | Environmental Engineering                                            | ICRA, Catalan Institute for Water Research            | Spain                                                      |
| Buttschardt, Tillmann  | Applied Landscape Ecology / Ecological Planning                      | University of Münster, Institute of Landscape Ecology | Germany                                                    |
| Bütün, Yagmur          | Doctoral researcher                                                  | Georg-August University                               | Germany                                                    |
| Butz, Martin           | Professor in Cognitive Modeling, Computer Science, Psychology        | Faculty of Science, University of Tuebingen           | Germany                                                    |
| Buxons Vives, Núria    | Biotechnologist                                                      | VIB Leuven                                            | Belgium                                                    |
| Buy, Andre             | Emeritus professor                                                   | University of Pretoria                                | South Africa                                               |

|                             |                                                       |                                                                                        |                                |
|-----------------------------|-------------------------------------------------------|----------------------------------------------------------------------------------------|--------------------------------|
| Bydlowski, Sergio           | Associate Professor, Hematology and Cell Therapy      | University of Sao Paulo School of Medicine                                             | Brazil                         |
| Byers, Jeb                  | Professor                                             | University of Georgia                                                                  | United States of America (the) |
| Byrne, James                | Professor, Climate Science and Solution               | University of Lethbridge                                                               | Canada                         |
| Caballer Gutierrez, Manuel  | Assistant Professor / Marine biology and biodiversity | American University of Paris                                                           | France                         |
| CABANAC, Remi               | Astronomer                                            | Universite de Toulouse                                                                 | France                         |
| Cabañas-Moreno, José        | Senior Researcher, Nanoscience & Nanotechnology       | CINVESTAV-IPN                                                                          | Mexico                         |
| Cabello, Iballa             | Assistant researcher/Professor                        | UTN & CONICET/UNCuyo                                                                   | Argentina                      |
| Cabello, Javier             | Professor                                             | University of Almería                                                                  | Spain                          |
| Cabezas, M. Pilar           | PostDoc Researcher                                    | CIBIO-InBIO                                                                            | Portugal                       |
| Cabin, Robert               | Professor of Environmental Studies                    | Brevard College                                                                        | United States of America (the) |
| Cabodevilla, Xabier         | PhD student on Ecology and Conservation Biology       | University of Basque Country (EHU) and Institute for Game and Wildlife Research (IREC) | Spain                          |
| Cabral, Andressa            | Master's Student                                      | Universidade de São Paulo                                                              | Brazil                         |
| Cabral de Oliveira, Mariana | Full Professor                                        | University of Sao Paulo                                                                | Brazil                         |
| Cabrerizo, Marco J.         |                                                       | University of Vigo                                                                     | Spain                          |
| Cabrero, Francisco J.       | Associate Professor                                   | Complutense University of Madrid                                                       | Spain                          |
| Cabrit, Sylvie              | Astrophysicist                                        | Observatoire de Paris                                                                  | France                         |
| Caccianiga, Marco           | Professor of Botany                                   | Università degli Studi di Milano                                                       | Italy                          |
| Caceres, Hernan             | PhD in Conservation Science                           |                                                                                        | Chile                          |
| CACERES, BOLIVAR            | RESEARCHER-GLACIOLOGY                                 | INAMHI                                                                                 | Ecuador                        |
| Cachera, Marie              | Numerical Ecology                                     | Shom                                                                                   | France                         |
| Cadena-Roa, Jorge           | Researcher/ Sociology                                 | CEIICH-UNAM                                                                            | Mexico                         |
| Cadez, Luca                 | Research fellow                                       | Università degli Studi di Udine                                                        | Italy                          |
| Cadima, Esperança           | Neurosciences                                         | ISCTE-IUL                                                                              | Portugal                       |
| Cadima, Esperança           | Neurosciences                                         | ISCTE-IUL                                                                              | Portugal                       |
| Cadotte, Marc               | Professor                                             | University of Toronto                                                                  | Canada                         |
| Cadoux, Anita               | geologist                                             | Université Paris-Sud 11                                                                | France                         |
| Caduff, Lea                 | Aquatic research                                      | Eawag                                                                                  | Switzerland                    |
| Cadwell, Larry              | Ecologist                                             | Pacific Northwest National Laboratory (retired)                                        | United States of America (the) |
| Cafaro, Philip              |                                                       | Colorado State University                                                              | United States of America (the) |
| CAHALAN, ROBERT             | Emeritus Scientist, Climate and Radiation Laboratory  | NASA Goddard Space Flight Ctr                                                          | United States of America (the) |
| Caicedo, Pilar              | PhD Student                                           | University of Western Ontario                                                          | Colombia                       |
| Cairns, Kylie               | Research Fellow                                       | Centre for Ecosystem Science, UNSW                                                     | Australia                      |
| Cairns, Michael             | Research Ecologist                                    |                                                                                        | United States of America (the) |
| Calatayud, Natalie          | Scientist Reproductive Biologist and conservationist  | Conservation Science Network                                                           | Australia                      |
| Calbi, Mariasole            | PhD student in Forest Ecology                         | Freie Universitaet Berlin                                                              | Germany                        |
| Calbó, Josep                | Professor, Physics                                    | Universitat de Girona                                                                  | Spain                          |
| Calderon, Jennifer          | master degree student                                 | Universidad Nacional de Colombia                                                       | Colombia                       |
| Calderon, Martha            | Professor                                             | Universidad Nacional de Colombia                                                       | Colombia                       |
| Calderon, Ana Patricia      | PhD, Conservation Biology                             | Leibniz Institute for Zoo and Wildlife Research                                        | Germany                        |

|                            |                                                         |                                                                 |                                                            |
|----------------------------|---------------------------------------------------------|-----------------------------------------------------------------|------------------------------------------------------------|
| Calderon-Aguilera, Luis E. | Professor, Marine Ecology                               | Center for Scientific Research and Graduate Studies of Ensenada | Mexico                                                     |
| Calhau, Júlia              | Postdoc researcher                                      | Universidade Federal do Espírito Santo                          | Brazil                                                     |
| Calì, Corrado              | Research Scientist, Neuroscience                        | KAUST                                                           | Saudi Arabia                                               |
| Caliari Oliveira, Ricardo  | Postdoctoral Fellow - Evolutionary Biology              | KU Leuven                                                       | Belgium                                                    |
| Caliman, Adriano           | Associate Professor in Ecology                          | Universidade Federal do Rio Grande do Norte                     | Brazil                                                     |
| Calisse, Paolo Gherardo    | Site Manager of the Cherenkov Telescope Array North     | CTAO gGmbH                                                      | Germany                                                    |
| Callaway, Ruth             | Senior Research Scientist Marine Ecosystems             | Swansea University                                              | United Kingdom of Great Britain and Northern Ireland (the) |
| Callejas-Díaz, Marta       | PhD Student- Forest Ecology and Genetics                | Forest Research Centre, INIA                                    | Spain                                                      |
| Callen, Roger              | Geologist/Social Anthropologist retired.                | Volunteer at Queensland State Herbarium, Mt Coot-tha.           | Australia                                                  |
| Callicott, Baird           | Regents Professor of Philosophy Emeritus                | University of North Texas                                       | United States of America (the)                             |
| Callister-Hakewill, Zoe    | Cognitive Science Research Officer                      | Macquarie University                                            | Australia                                                  |
| Callway, Dr. Rosalie       | Sustainable urban ecology                               | Consultant & Partnership for Biodiversity in Planning           | United Kingdom of Great Britain and Northern Ireland (the) |
| Calmé, Sophie              | Professor, Tropical Ecology and Conservation            | Université de Sherbrooke                                        | Canada                                                     |
| Calvache, Diana            | Marine Biologist                                        | University of Ghent                                             | Ecuador                                                    |
| Calvani, Sandro            | Senior Adviser                                          | Mae Fah Luang Foundation (under Royal Patronage)                | Thailand                                                   |
| Calvert, Jed               | PhD student, fungal ecology                             | University of Queensland                                        | Australia                                                  |
| Calvet, Jean-Christophe    | Researcher                                              | CNRM (Université de Toulouse, Meteo-France, CNRS)               | France                                                     |
| Calvo Carrasco, Daniel     | Veterinary medicine                                     | Wildfowl & Wetlands Trust (WWT)                                 | United Kingdom of Great Britain and Northern Ireland (the) |
| Camacho, Carlos            | Postdoctoral researcher in Evolutionary Ecology         | Lund University                                                 | Sweden                                                     |
| Camacho, Miguel            | postdoctoral researcher conservation genetics           | CiBIO                                                           | Portugal                                                   |
| Camacho, Antonio           | Full Professor on Ecology                               | University of Valencia                                          | Spain                                                      |
| Camacho de Coca, Fernando  | CEO Earth Observation Laboratory / biosphere from space | EOLAB                                                           | Spain                                                      |
| Camakaris, Helen           | Honorary Fellow in the School of Biosciences            | University of Melbourne                                         | Australia                                                  |
| Camara Assis, Julia        | PhD candidate in Biodiversity                           | UNESP Rio Claro                                                 | Brazil                                                     |
| Cámara de Landa, Enrique   | Full professor (catedrático)                            | Universidad de Valladolid                                       | Spain                                                      |
| Camarda, Martina           | Electronic Engineering                                  |                                                                 | Italy                                                      |
| Camargo, Arley             | University professor                                    | Universidad de la República                                     | Uruguay                                                    |
| Camargo, Nicholas          | Post-doc position in the department of ecology          | University of Brasilia                                          | Brazil                                                     |
| Camarretta, Nicolo         | PhD candidate / Remote sensing in restoration ecology   | University of Tasmania                                          | Australia                                                  |
| Cameron, Elissa            | Professor                                               | University of Canterbury                                        | New Zealand                                                |
| Caminata, Alessio          | Researcher                                              |                                                                 | Italy                                                      |
| CAMINO, MICAELA            | Dr Biology - Conservation Ecology                       | Proyecto Quimilero                                              | Argentina                                                  |
| Camp, Amber                | PhD student                                             | University of Hawaii at Manoa                                   | United States of America (the)                             |
| CAMPA, Claudine            | Plant Cell Physiologist                                 | IRD                                                             | France                                                     |
| Campana, Steven            |                                                         | University of Iceland                                           | Iceland                                                    |

|                              |                                                                          |                                                                                                                     |                                                            |
|------------------------------|--------------------------------------------------------------------------|---------------------------------------------------------------------------------------------------------------------|------------------------------------------------------------|
| Campana, Julie               | Graduate with master's degree in Ecology and Evolution                   | University of Toulouse                                                                                              | France                                                     |
| Campbell, A. Malcolm         | Professor of Biology                                                     | Davidson College                                                                                                    | United States of America (the)                             |
| Campbell, Lani               | Research Officer                                                         | Children's Hospital Westmead                                                                                        | Australia                                                  |
| Campbell, Bruce              | Director                                                                 | CGIAR Research Program on Climate Change, Agriculture and Food Security                                             | Denmark                                                    |
| Campbell, David              | Associate Professor, Environmental Sciences                              | University of Waikato                                                                                               | New Zealand                                                |
| Campbell, David              | Professional Geoscientist                                                | MarineBio Conservation Society                                                                                      | United States of America (the)                             |
| Campbell, W. Bruce           | Research Ecologist                                                       |                                                                                                                     | United States of America (the)                             |
| Campeau, Stephane            | Professor                                                                | Universite du Quebec a Trois-Rivieres                                                                               | Canada                                                     |
| Campenni, Marco              | Research Fellow                                                          | University of Exeter                                                                                                | United Kingdom of Great Britain and Northern Ireland (the) |
| Camphuijsen, Marjolein       | PhD researcher in Sociology                                              | Autonomous University of Barcelona                                                                                  | Spain                                                      |
| Camphuysen, C.J.             | Senior scientist                                                         | Royal Netherlands Institute for Sea Research                                                                        | Netherlands (the)                                          |
| Campillo i López, Ferran     | Pediatrician                                                             | Garrotxa Pediatric Environmental Health Specialty Unit (PEHSU Garrotxa) - Hospital d'Olot i Comarcal de la Garrotxa | Spain                                                      |
| Campioli, Matteo             | Professor Plant Ecology                                                  | University of Antwerp                                                                                               | Belgium                                                    |
| Campo, Julio                 | Professor                                                                | Universidad Nacional Autónoma de México                                                                             | Mexico                                                     |
| Campo Garcia, Juliana        | PhD Student                                                              | Charité Universitätsmedizin Berlin                                                                                  | Germany                                                    |
| Campos, Isabel               | Researcher                                                               | University of Aveiro                                                                                                | Portugal                                                   |
| Campos, Edmo                 | Professor of Physical Oceanography                                       | University of Sao Paulo                                                                                             | Brazil                                                     |
| Campos Arce, José Joaquín    | Forestry                                                                 | Sustainable Agriculture Network SAN                                                                                 | Costa Rica                                                 |
| Camprubí, Antoni             | Senior researcher / Geology                                              | Universidad Nacional Autónoma de México                                                                             | Mexico                                                     |
| Camsund, Daniel              | Post-doctoral researcher                                                 | Uppsala university                                                                                                  | Sweden                                                     |
| Canales, Valeria             | Customer Service                                                         | Dominoes                                                                                                            | United States of America (the)                             |
| Canales-Aguirre, Cristian B. | Associate Professor                                                      | Centro i mar, Universidad de Los Lagos                                                                              | Chile                                                      |
| Canals, Rosa M               | University Professor- Fire ecology-Landscape ecology                     | Universidad Pública de Navarra                                                                                      | Spain                                                      |
| Canário, João                | Researcher/Professor                                                     | Instituto Superior Técnico - University of Lisbon                                                                   | Portugal                                                   |
| Cancela da Fonseca, Luís     | Retired Professor/Researcher at MARE                                     | Algarve University/MARE - Guia Marine Laboratory (FCUL)                                                             | Portugal                                                   |
| Candler, Wilfred             | Agricultural Economics, Ph.D., D.S.C.                                    | Retired                                                                                                             | New Zealand                                                |
| CANEDO, Clarissa             | Professor, Zoology                                                       | Universidade do Estado do Rio de Janeiro (UERJ)                                                                     | Brazil                                                     |
| Canepari, Marco              | Researcher-Neuroscience                                                  | LIPhy, CNRS UMR 5588                                                                                                | France                                                     |
| Canese, Simonepietro         | Senior Technologist                                                      | Stazione Zoologica Anton Dohrn                                                                                      | Italy                                                      |
| Canessa, Raffaella           | PhD student, Plant ecology                                               | University of Marburg                                                                                               | Germany                                                    |
| Caniglia, Guido              | Scientific Director                                                      | Konrad Lorenz Institute for Evolution and Cognition Research                                                        | Austria                                                    |
| Canle, Moisés                | Prof. of Physical Chemistry                                              | University of A Coruña                                                                                              | Spain                                                      |
| Cannelli, Selene             | Master student in marine viromics and their impact on ocean environments | University of Queensland                                                                                            | Australia                                                  |

|                                      |                                                                             |                                                                                                                  |                                                            |
|--------------------------------------|-----------------------------------------------------------------------------|------------------------------------------------------------------------------------------------------------------|------------------------------------------------------------|
| Cannizzaro, Leonardo                 | Researcher                                                                  | National Research Council - Institute of Marine Biological Resources and Biotechnologies Mazara del Vallo branch | Italy                                                      |
| Cano-Barbacil, Carlos                |                                                                             | University of Girona                                                                                             | Spain                                                      |
| Canovas, Miguel                      | Ecology Environmental Management                                            |                                                                                                                  | United Kingdom of Great Britain and Northern Ireland (the) |
| Cansler, C Alina                     | Research Ecologist                                                          | University of Washington                                                                                         | United States of America (the)                             |
| Cantarello, Elena                    | Lecturer                                                                    | Bournemouth University                                                                                           | United Kingdom of Great Britain and Northern Ireland (the) |
| Canzler, Sebastian                   | Postdoc in Bioinformatics                                                   | Helmholtz-Centre for Environmental Research - UFZ                                                                | Germany                                                    |
| Capa, Maria                          | Ramon y Cajal fellow, Marine Biologist                                      | University of the Balearic Islands                                                                               | Spain                                                      |
| Capan, Cigdem                        | Clinical Assistant Professor of Physics                                     | Washington State University                                                                                      | United States of America (the)                             |
| Cape, Mattias                        | Oceanographer                                                               | University of Washington                                                                                         | United States of America (the)                             |
| Capellán-Pérez, Iñigo                | Researcher. Group of Energy, Economy and System Dynamics                    | University of Valladolid                                                                                         | Spain                                                      |
| Capellesso, Elivane                  | Doutoranda em Ecologia                                                      | UFPR                                                                                                             | Brazil                                                     |
| Capelli, Mathilde                    | Scientific researcher in agronomy and environment                           | INRA France                                                                                                      | France                                                     |
| Capello, Marco                       | Researcher in Physical oceanography                                         | DISTAV - University of Genoa                                                                                     | Italy                                                      |
| Capelo, Jorge                        | Senior Researcher / Vegetation Science                                      | National Institute of Agrarian and Veterinarian Research                                                         | Portugal                                                   |
| Capers, Robert                       | Botanist. retired                                                           | University of Connecticut                                                                                        | United States of America (the)                             |
| Capet, Xavier                        | Oceanography                                                                | LOCEAN, IPSL                                                                                                     | France                                                     |
| Capinha, Cesar                       | Research Fellow in Biogeography & Invasion Ecology                          | Centre for Geographical Studies of the University of Lisbon                                                      | Portugal                                                   |
| Capo, Eric                           | PhD, Post-doctoral Researcher in Aquatic Ecology                            | Umeå University                                                                                                  | Sweden                                                     |
| Capparella, Angelo                   | Emeritus Professor of Zoology                                               | Illinois State University                                                                                        | United States of America (the)                             |
| Capparelli, Mariana                  | Scientist                                                                   |                                                                                                                  | Ecuador                                                    |
| Capretz Batista da Silva, João Paulo | Professor                                                                   | UFPB                                                                                                             | Brazil                                                     |
| Capucho, Ana Teresa                  | Biologist                                                                   |                                                                                                                  | Portugal                                                   |
| Caracciolo, Romane                   | Phd student in Environmental Chemistry                                      | Institut des Géosciences de l'Environnement (IGE)                                                                | France                                                     |
| Carafa, Roberta                      | post doc researcher                                                         | University Rovira y Virgili                                                                                      | Spain                                                      |
| Čaraitė, Ieva                        | Graduate Student                                                            | Ghent University                                                                                                 | Lithuania                                                  |
| Caravaggi, Anthony                   | Lecturer in Conservation Biology                                            | University of South Wales                                                                                        | United Kingdom of Great Britain and Northern Ireland (the) |
| Carbajal, Juan Pablo                 | Researcher, Applied Physics                                                 | University of Applied Sciences Rapperswil                                                                        | Switzerland                                                |
| Carbajo Martinez, Manuel             | Bioinformatician                                                            | European Bioinformatics Institute                                                                                | United Kingdom of Great Britain and Northern Ireland (the) |
| Carballo, José Luis                  | Head of Marine Biology Station (east Pacific); benthic ecology and taxonomy | Instituto de Ciencias del Mar y Limnología, Universidad Nacional Autónoma de México                              | Mexico                                                     |
| Carballo-Bolaños, Rodrigo            | PhD student                                                                 | Biodiversity Research Center, Academia Sinica                                                                    | Taiwan                                                     |
| Carbillet, Jeffrey                   | PhD student in ecology                                                      | CEFS, Université de Toulouse, INRA, Castanet Tolosan, 31326                                                      | France                                                     |
| Carden, Kristin                      | Oceans Program Scientist                                                    | Center for Biological Diversity                                                                                  | United States of America (the)                             |

|                               |                                                             |                                                                    |                                                            |
|-------------------------------|-------------------------------------------------------------|--------------------------------------------------------------------|------------------------------------------------------------|
| Cardigos, Frederico           | Former Research Assistant                                   | Okeanos, Horta, Açores, Portugal                                   | Portugal                                                   |
| Cardinael, Rémi               | Dr in soil science and agronomy                             | CIRAD                                                              | France                                                     |
| Cardinal, Damien              | Professor in marine chemistry and biogeochemistry           | LOCEAN-IPSL, Sorbonne University                                   | France                                                     |
| Cardinal, Claire              | PhD student - Primatology                                   | Oxford Brookes University                                          | United Kingdom of Great Britain and Northern Ireland (the) |
| cardini, andrea               | researcher/biology                                          | university of modena                                               | Italy                                                      |
| Cardini, Ullisse              | Research Scientist                                          | Stazione Zoologica Anton Dohrn                                     | Italy                                                      |
| Cardone, Paolo                | Master of Science, Cognitive Neuroscience                   |                                                                    | Italy                                                      |
| Cardoso, Pedro                | Curator                                                     | Finnish Museum of Natural History, University of Helsinki          | Finland                                                    |
| Cardoso, Margarida            | Researcher                                                  | Universidade de Coimbra                                            | Portugal                                                   |
| Cardoso, Jean-Francois        | Astrophysics                                                | Institut d'Astrophysique de Paris                                  | France                                                     |
| Cardoso Pereira, Cássio       | Ph.D. student in Ecology                                    | Universidade Federal de Minas Gerais                               | Brazil                                                     |
| Carducci, Michele             | Full professor Comparative Constitutional Law & Climate Law | CADEAUM University of Salento - Lecce                              | Italy                                                      |
| Carey, Donna                  | Pharmacology                                                | Merck Serono                                                       | Australia                                                  |
| Carey, Mark                   | Ecologist                                                   | University of South Australia                                      | Australia                                                  |
| Carey, James                  | Distinguished Professor of Entomology                       | University of California, Davis                                    | United States of America (the)                             |
| Carignano Torres, Patricia    | Postdoctoral                                                | University of São Paulo                                            | Brazil                                                     |
| Carim, Sean                   | Microbiology                                                | University of California, Berkeley                                 | United States of America (the)                             |
| CARIM, MARCELO DE JESUS       | Environmental Analyst / Scientist                           | Institute of Scientific and Technological Research of Amapá - IEPA | Brazil                                                     |
| Cariñanos, Paloma             | Botanist                                                    | University of Granada,                                             | Spain                                                      |
| Carleson, Nicholas            | PhD Student, Plant Pathology                                | Oregon State University                                            | United States of America (the)                             |
| Carlesso, Lea                 | Soil ecologist                                              |                                                                    | France                                                     |
| Carley, Lauren                | PhD Candidate                                               | Duke University                                                    | United States of America (the)                             |
| Carlile, Nicholas             | Principal Scientist, Conservation Science                   | Office of Environment                                              | Australia                                                  |
| Carlisle, Alison              | Scientist                                                   | University of Queensland                                           | Australia                                                  |
| Carlisle, Liz                 | Assistant Professor, Environmental Studies                  | University of California, Santa Barbara                            | United States of America (the)                             |
| Carlos-Pinedo, Sandra         | PhD Candidate, Environmental Engineering                    | University of Gävle                                                | Sweden                                                     |
| Carlson, Bruce                | Professor Emeritus                                          | University of Michigan                                             | United States of America (the)                             |
| Carlson, Bruce                | Associate Professor of Biology                              | Dr.                                                                | United States of America (the)                             |
| Carlsson, Jens                | Associate Professor Conservation Genetics                   | University College Dublin                                          | Ireland                                                    |
| Carlsson, Pernilla            | Researcher, environmental/analytical chemistry              | Norwegian Institute for Water Research                             | Norway                                                     |
| Carmen, Esther                | Interdisciplinary environmental social scientist            | University of York                                                 | United Kingdom of Great Britain and Northern Ireland (the) |
| Carmignotto, Ana Paula        | PhD in Zoology, Discipline of Vertebrate Evolution          | Universidade Federal de São Carlos,Campus Sorocaba                 | Brazil                                                     |
| Carmona Higueta, Maria Judith | B. Sc. Biology                                              | University of Antioquia                                            | Colombia                                                   |
| Carnall, Mark                 | Zoologist                                                   | Oxford University                                                  | United Kingdom of Great Britain and Northern Ireland (the) |
| Carneiro da Cunha, Manuela    | Professor emerita/ Anthropology                             | University of Chicago                                              | United States of America (the)                             |
| Carney Almroth, Bethanie      | Assoc Prof ecotoxicology and environmental science          | University of Gothenburg                                           | Sweden                                                     |

|                            |                                                                |                                                                     |                                |
|----------------------------|----------------------------------------------------------------|---------------------------------------------------------------------|--------------------------------|
| caro, gael                 | Lecturer                                                       | university of Lorraine                                              | France                         |
| Carolli, Mauro             | River science, research assistant                              | Leibniz institute for freshwater ecology and inland fishery         | Germany                        |
| Carollo, Angela            | PhD Student in Statistical Demography                          | MPIDR                                                               | Germany                        |
| Caron, Maria Mercedes      | Researcher                                                     | CONICET                                                             | Argentina                      |
| CARON, Thibault            | PhD student / Biology                                          | Université Paris-Sud                                                | France                         |
| CAROZZI, MARCO             | Post Doc                                                       | INRAe EcoSys                                                        | France                         |
| CARPANETO, Giuseppe Maria  | Professor of Animal Diversity                                  | Roma Tre University, Department of Science                          | Italy                          |
| Carpenter, Brian           | Honorary Professor, Computer Science                           | The University of Auckland                                          | New Zealand                    |
| Carpenter-Kling, Tegan     | PhD candidate                                                  | Nelson Mandela University                                           | South Africa                   |
| Carpentier, Alexandre      | Assistant professor / Marine ecologist                         | University of Rennes 1                                              | France                         |
| Carpin, Sabine             | Assistant Professor in Plant Molecular Biology                 | University of Orléans                                               | France                         |
| Carr, Dick                 | Conservation biologist                                         | The Eden to Addo Corridor Initiative                                | South Africa                   |
| Carrasco, Mar              | Veterinarian                                                   | Reneco Wildlife Consultants                                         | Morocco                        |
| Carrasco Gómez, Martín     | PhD student in Biomedical Engineering                          | Technical University of Madrid                                      | Spain                          |
| Carrasco-Barea, Lorena     | PhD student                                                    | University of Girona                                                | Spain                          |
| carrasco-Valenzuela, Tomas | PhD. student                                                   | Leibniz-Institut für Zoo- und Wildtierforschung                     | Chile                          |
| Carrascosa, José M.        | Professor of Biochemistry and Molecular Biology                | Universidad Autónoma de Madrid                                      | Spain                          |
| CARREIRA, JOSE A.          | UNIVERSITY PROFESSOR / ECOLOGY                                 | UNIVERSITY OF JAÉN                                                  | Spain                          |
| Carreiro, Ana Rita         | PhD student in Ecology                                         | MARE-UC, University of Coimbra                                      | Portugal                       |
| Carreiro-Silva, Marina     | Researcher                                                     | OKEANOS center, University of the Azores                            | Portugal                       |
| Carrere, Helene            | Associate professor, Physics                                   | Université de Toulouse                                              | France                         |
| Carretero, Miguel A.       | Principal Researcher                                           | CIBIO-InBIO, University of Porto                                    | Portugal                       |
| Carretero Pinzon, Xyomara  | Landscape ecologist                                            | Zocay project                                                       | Colombia                       |
| Carricondo Sánchez, David  | Assistant professor in ecology                                 | Inland Norway University                                            | Norway                         |
| Carrié, Romain             | Researcher                                                     | Lund University                                                     | Sweden                         |
| Carrillo, Yolima           | Senior Lecturer in Biogeochemistry                             | Western Sydney University, Hawkesbury Institute for the Environment | Australia                      |
| Carrillo, Presentacion     | Full Professor of Ecology                                      | Universidad de Granada                                              | Spain                          |
| Carrillo-Rojas, Galo       | Professor / Atmosphere-Surface Processes in the Highland Andes | University of Cuenca                                                | Ecuador                        |
| Carrillo-Tripp, Mauricio   | Principal Investigator, Molecular Biophysics                   | CINVESTAV                                                           | Mexico                         |
| Carroll, Ron               | Emeritus Professor of Ecology                                  | Odum School of Ecology, Univ Georgia                                | United States of America (the) |
| Carrosio, Giovanni         | Environmental sociologist                                      | University of Trieste                                               | Italy                          |
| Carruth, Laura             | Associate Professor, Neuroscience Institute                    | Georgia State University                                            | United States of America (the) |
| Carson, Bobb               | Professor Emeritus/Earth & Environmental Sciences              | Lehigh University                                                   | United States of America (the) |
| Carstens, Kai              | Scientist, electrical engineer                                 |                                                                     | Germany                        |
| Carstens, Herman           | Engineering Statistics                                         | Invoke Analytics                                                    | South Africa                   |
| Carstensen, Jacob          | Professor, Marine Ecology                                      | Aarhus University, Dept. of Bioscience                              | Denmark                        |
| Carter, Sarah              | Researcher                                                     | Wageningen University                                               | Netherlands (the)              |
| Carter, Dee                | Professor of Microbiology                                      | University of Sydney                                                | Australia                      |

|                                        |                                                                                          |                                                                |                                                            |
|----------------------------------------|------------------------------------------------------------------------------------------|----------------------------------------------------------------|------------------------------------------------------------|
| Carter, Peter                          | Climate policy director                                                                  | Climate Emergency Institute                                    | Canada                                                     |
| Carter, Joy                            | Vice Chancellor and Professor of Environmental Science                                   | University of Winchester                                       | United Kingdom of Great Britain and Northern Ireland (the) |
| Carter, Kerryyn                        | Wildlife Biologist                                                                       | Elephant Connection (NGO)                                      | Zambia                                                     |
| CARTERET, Marion                       | researcher environmental chemistry                                                       | Savoie Mont Blanc University                                   | France                                                     |
| Carturan, Bruno                        | PhD student in Ecology                                                                   | UBCO                                                           | Canada                                                     |
| Cartwright, Samantha                   | Senior Biodiversity & Planning Officer / PhD conservation biology                        | The Wildlife Trusts                                            | United Kingdom of Great Britain and Northern Ireland (the) |
| Carvajal-Quintero, Juan                | PhD Student                                                                              | INECOL                                                         | Mexico                                                     |
| Carvalho, João                         | Postdoctoral researcher                                                                  | University of Aveiro                                           | Portugal                                                   |
| Carvalho, Gervásio                     | Professor                                                                                | Pontificia Universidade Católica do Rio Grande do Sul (PUCRS)  | Brazil                                                     |
| Carvalho, Sara                         | Researcher on Environmental Education                                                    | University of Aveiro                                           | Portugal                                                   |
| Carvalho, Rafael                       | PhD Student                                                                              | Centre for Functional Ecology                                  | Portugal                                                   |
| Carvalho, David                        | Researcher                                                                               | Aveiro University                                              | Portugal                                                   |
| Carvalho Melo dos Santos, Tamily       | Geographer/Conservation                                                                  | Instituto de Desenvolvimento Sustentável Mamirauá              | Brazil                                                     |
| CARVALHO SOBRINHO, JEFFERSON GUEDES DE | Full professor                                                                           | UNIVASF                                                        | Brazil                                                     |
| Casadei, Cecilia                       | Postdoctoral researcher / Structural biology and data science.                           | ETH                                                            | Switzerland                                                |
| Casadevall, Margarida                  | University professor                                                                     | Universitat de Girona                                          | Spain                                                      |
| Casagrande, Elvira                     | Phd Student - Ecology                                                                    | CONICET                                                        | Argentina                                                  |
| Casagrande, Stefania                   | Scientific Researcher                                                                    | Max Planck Institute                                           | Germany                                                    |
| Casagrandi, Renato                     | Professor of Ecology                                                                     | Politecnico di Milano                                          | Italy                                                      |
| Casals, Frederic                       | Lecturer /Wildlife, Fish & Game Management                                               | Dept. of Animal Science - University of Lleida                 | Spain                                                      |
| Casamatta, Dale                        | Professor of Biology                                                                     | University of North Florida                                    | United States of America (the)                             |
| Casamayor, Emilio O                    | Research Professor - Spanish Research Council                                            | CEAB-CSIC                                                      | Spain                                                      |
| Casano, Leonardo                       | Full Professor of Plant Physiology                                                       | University of Alcalá                                           | Spain                                                      |
| Casares, María Victoria                | Biology                                                                                  | Universidad del Salvador                                       | Argentina                                                  |
| Casares, Fernanda                      | Postdoctoral researcher                                                                  | Universidade do Estado do Rio de Janeiro                       | Brazil                                                     |
| Casas, Santiago                        | Postdoctoral Researcher in Cosmology and Astrophysics                                    | Commissariat à l'énergie atomique et aux énergies alternatives | France                                                     |
| Casas-Ruiz, Joan Pere                  | Postdoctoral Researcher                                                                  | Université du Québec à Montréal                                | Canada                                                     |
| Caselli, Christini                     | Postdoc                                                                                  | Universidade Federal Rural de Pernambuco                       | Brazil                                                     |
| Casotti, Giovanni                      | Professor of Biology                                                                     | West Chester University                                        | United States of America (the)                             |
| Casper, Gary                           | Wildlife Biologist                                                                       | University of Wisconsin-Milwaukee                              | United States of America (the)                             |
| Casper, A.M. Aramati                   | Research Associate, Ecology and STEM education                                           | Colorado State University                                      | United States of America (the)                             |
| Casquet, Julianne                      | Coordinator of the LIFE FORECCAsT project and PhD in Ecology, Biodiversity and Evolution | Parc naturel régional du Haut-Languedoc                        | France                                                     |
| Cass, Noel                             | Researcher                                                                               | Lancaster University                                           | United Kingdom of Great Britain and Northern Ireland (the) |
| Cass, Alfred                           | Soil Scientist                                                                           | Alfred Cass & Associates                                       | United States of America (the)                             |

|                                 |                                                              |                                                                          |                                                            |
|---------------------------------|--------------------------------------------------------------|--------------------------------------------------------------------------|------------------------------------------------------------|
| Cassabois, Guillaume            | Professor in Physics                                         | Montpellier University                                                   | France                                                     |
| Cassaigne, Ivonne               | PhD Veterinarian                                             | Primero Conservation                                                     | Mexico                                                     |
| Cassani, Marco                  | Post Doc                                                     | ICRC-FNUSA                                                               | Czech Republic (the)                                       |
| Cassardo, Claudio               | Professor, physics-climate-meteorology                       | Dept. of Physics, University of Torino                                   | Italy                                                      |
| Casselman, John M.              | Adjunct Professor                                            | Biology Department, Queen's University                                   | Canada                                                     |
| Cassotta, Manuela               | Biologist                                                    | University of Trieste                                                    | Italy                                                      |
| Castagneri, Daniele             | MSCA post-doc, Forest Dynamics Unit                          | WSL                                                                      | Switzerland                                                |
| Castanho, Camila de Toledo      | Assistant professor                                          | Universidade Federal de São Paulo (UNIFESP)                              | Brazil                                                     |
| CASTANO, Sabine                 | Assistant Professor / Biophysics-Spectroscopy                | CBMN-University Bordeaux                                                 | France                                                     |
| Castaño-Arboleda, Nicolas       | Associate researcher                                         | Instituto Sinchi                                                         | Colombia                                                   |
| CASTEGE, Iker                   | Director                                                     | Centre de la Mer de Biarritz                                             | France                                                     |
| Castellana, Daniele             | PhD candidate in Climate Physics                             | Utrecht University                                                       | Netherlands (the)                                          |
| Castellano, Gabriela            | Associate Professor, Physics                                 | University of Campinas (UNICAMP)                                         | Brazil                                                     |
| Castellano, Immacolata          | Researcher                                                   | Stazione zoologica Anton Dohrn                                           | Italy                                                      |
| Castellanos, Francisco          | Genetics student                                             | UNaM                                                                     | Argentina                                                  |
| Castellanos, Edwin              | Dean, Research Institute                                     | Universidad del Valle de Guatemala                                       | Guatemala                                                  |
| Castellanos-Galindo, Gustavo A  | Postdoctoral Fellow / Marine Sciences                        | Smithsonian Tropical Research Institute                                  | Panama                                                     |
| Castello-Branco, Cristiana      | Postdoctoral fellow                                          | Smithsonian National Museum of Natural History                           | United States of America (the)                             |
| Castellví Corrons, Xavier       | PhD student                                                  | University of Florence                                                   | Italy                                                      |
| Castilla, María Cecilia         | Doctora-Etnoecóloga                                          | Centro de Investigaciones y Transferencia de Catamarca CONICET UNCA      | Argentina                                                  |
| Castillo, Paula M.              | PhD in Chemistry. Nanotechnology.                            | Sevilla University                                                       | Spain                                                      |
| Castillo, Luciana Raquel        | Personal de Apoyo a la Investigación                         | Consejo Nacional de Investigaciones Científicas y Tecnológicas (CONICET) | Argentina                                                  |
| Castillo, Yerko                 | Environmental Scientist                                      | Universidad Austral de Chile                                             | Chile                                                      |
| Castillo, Gonzalo               | Fish biologist                                               | USFWS                                                                    | United States of America (the)                             |
| Castillo, Maria Loreto          | Ecologist. PhD candidate                                     | Centre for Invasion Biology - Stellenbosch University                    | South Africa                                               |
| CASTILLO, RODOLFO               | Managing Director                                            | BIOCERAMIC RESTORATIVE MATERIAL                                          | United States of America (the)                             |
| CASTILLO, MARIA                 | RESEARCHER                                                   | CINVESTAV                                                                | Mexico                                                     |
| CASTILLO, Maria                 | Anthropologist                                               | CINVESTAV                                                                | Mexico                                                     |
| Castillo López, María           | PhD Student (Biochemistry and Molecular Biology)             | Centro de Investigaciones Biológicas (CSIC)                              | Spain                                                      |
| Castledine, Meaghan             | PhD student in Evolutionary ecology                          | University of Exeter                                                     | United Kingdom of Great Britain and Northern Ireland (the) |
| Castrillon-Cifuentes, Ana Lucia | Research / Coral reef Ecology                                | Coral Reef Ecology research group                                        | Colombia                                                   |
| Castro, José J.                 | Lecturer and Researcher in Marine Fisheries and Fish Biology | Universidad de Las Palmas de Gran Canaria (ULPGC), Canary Islands        | Spain                                                      |
| Castro, Jessica                 | Ecologist, contractor                                        | International Institute of Tropical Forestry                             | Puerto Rico                                                |
| Castro, Ivone                   | Molecular biology                                            | Health Secretary of Mexico City                                          | Mexico                                                     |
| Castro, Telma                   | Researcher/ Atmospheric Chemistry                            | Universidad Nacional Autónoma de México                                  | Mexico                                                     |
| Castro, Italo                   | Full Professor                                               | Institute of Marine Science - Universidade Federal de São Paulo          | Brazil                                                     |
| Castro, Francisca               | Professor                                                    | University of Córdoba                                                    | Spain                                                      |

|                                              |                                                                                |                                                                            |                                                            |
|----------------------------------------------|--------------------------------------------------------------------------------|----------------------------------------------------------------------------|------------------------------------------------------------|
| Castro, Raul                                 | Research Seismologist and Professor                                            | Centro de Investigacion Cientifica y de Educacion Superior de Ensenada     | Mexico                                                     |
| Castro Cobo, Sara                            | PhD candidate                                                                  |                                                                            | Spain                                                      |
| Castro Contreiras de Carvalho, Ignes Augusta | PhD in the Industrial Ecology group                                            | University of Lausanne                                                     | Switzerland                                                |
| Castro Pena, João Carlos                     | Post doc fellow, Ecology                                                       | Unesp                                                                      | Brazil                                                     |
| Castro-Arellano, Ivan                        | Associate Professor                                                            | Texas State University                                                     | United States of America (the)                             |
| Caswell, Hal                                 | Professor of Mathematical Demography and Ecology                               | University of Amsterdam                                                    | Netherlands (the)                                          |
| Catalán García, Núria                        | RESEARCHER IN BIOGEOCHEMISTRY                                                  | CATALAN INSTITUTE FOR WATER RESEARCH                                       | Spain                                                      |
| Catalano, Francesca                          | Associate Dean of Math, Science and Engineering. Discipline: Molecular Biology | Kankakee Community College                                                 | United States of America (the)                             |
| CATAPANI, MARIANA                            | PHD student                                                                    | University of Sao Paulo                                                    | Brazil                                                     |
| CATELANI, Paula                              | Postdoctoral researcher                                                        | Universidade Federal do Rio de Janeiro                                     | Brazil                                                     |
| Catellani, Patrizia                          | Professor of Social Psychology                                                 | Catholic University of Milan                                               | Italy                                                      |
| Catherine, Hänni                             | Ecology/ Evolutionary sciences                                                 | CNRS France                                                                | France                                                     |
| Catherine, Turlan                            | Research engineer                                                              | CNRS                                                                       | France                                                     |
| Catry, Teresa                                | Research Assistant                                                             | Faculty of Sciences, University of Lisbon                                  | Portugal                                                   |
| Catry, Filipe                                | Researcher                                                                     | CEABN/InBIO, University of Lisbon                                          | Portugal                                                   |
| Cattaneo, Claudio                            | Associate Professor Ecological Economics                                       | Autonomous University of Barcelona                                         | Spain                                                      |
| Cattanéo, Franck                             | Professor, Aquatic Ecology                                                     | University of Applied Sciences and Arts Western Switzerland - Hepia Geneva | Switzerland                                                |
| Cattani, Eduardo                             | Mathematics                                                                    | University of Massachusetts Amherst                                        | United States of America (the)                             |
| Cattaud, Vanessa                             | Post Doc in Neuroscience                                                       | University of Alberta                                                      | Canada                                                     |
| Catterall, Claudia                           | Lecturer, Ecology                                                              | Southern Cross University                                                  | Australia                                                  |
| Catzeflis, Francois                          | Biologist, Emeritus Research Director                                          | University of Montpellier and CNRS                                         | France                                                     |
| Cauchard, Laure                              | Postdoctoral Researcher                                                        | University of Aberdeen                                                     | United Kingdom of Great Britain and Northern Ireland (the) |
| Cauchi, John Paul                            | Environmental Public health                                                    | Queensland University of Technology                                        | Australia                                                  |
| Cauchi, Marija                               | Doctor of Medicine                                                             | Malta neurosciences dept                                                   | Malta                                                      |
| Cauchi, Daniel                               | Public Health                                                                  | University of Malta                                                        | Malta                                                      |
| Cauda, Franco                                | Associate Professor in Psychophysiology                                        | Università di Torino                                                       | Italy                                                      |
| Caujapé-Castells, Juli                       | Director and Head of Research                                                  | Jardin Botanico Canario "Viera y Clavijo"-Unidad Asociada al CSIC          | Spain                                                      |
| Caulier, Guillaume                           | Post-doc in Marine Biology                                                     | UMONS                                                                      | Belgium                                                    |
| Cauvy-Fraunié, Sophie                        | Hydroecology                                                                   | IRSTEA                                                                     | France                                                     |
| Cavalcanti, Clóvis                           | Past President                                                                 | International Society for Ecological Economics                             | Brazil                                                     |
| Cavallari, Carla                             | Pedagogy Student                                                               | Senac                                                                      | Brazil                                                     |
| Cavallero, Laura                             | Researcher                                                                     | CONICET                                                                    | Argentina                                                  |
| Cavalli, Laura                               | Economist, Senior researcher -Agenda 2030-                                     | FEEM, Milan                                                                | Italy                                                      |
| Cavallin Toscani, Antonio                    | Phd student in Management Engineering                                          | Department of Management and Engineering, University of Padova             | Italy                                                      |
| Cavarzere, Vagner                            | Profesor                                                                       | Universidade Tecnológica Federal do Paraná                                 | Brazil                                                     |

|                                             |                                                    |                                                                     |                                                            |
|---------------------------------------------|----------------------------------------------------|---------------------------------------------------------------------|------------------------------------------------------------|
| Cave, Ronald                                | University Professor                               | University of Florida                                               | United States of America (the)                             |
| CAVE, JEREMIE                               | PhD in Urban Planning                              | Sciences Po Toulouse                                                | France                                                     |
| Cavicchioli, Ricardo                        | Professor                                          | UNSW Sydney                                                         | Australia                                                  |
| Cavigliasso, Fanny                          | Postdoc researcher                                 | University of Lausanne                                              | Switzerland                                                |
| Cavitte, Marie                              | postdoc, glaciology+modelling                      | UC Louvain, Belgium                                                 | Belgium                                                    |
| Cawley, Oisin                               | Lecturer and Researcher                            | Institute of Technology Carlow                                      | Ireland                                                    |
| Cayetano, Denver                            | Forest Biologist                                   | University of Belize Environmental Research Institute               | Belize                                                     |
| Cayuela, Luis                               | Associate Professor                                | Universidad Rey Juan Carlos                                         | Spain                                                      |
| Cazalé-Debat, Laurie                        | PhD student in chemical ecology                    | Centre des sciences du gout et de l'alimentation                    | France                                                     |
| Cazelles, Bernard                           | Professor                                          | Sorbonne University                                                 | France                                                     |
| Cazelles, Kevin                             | Postdoc                                            | University of Guelph                                                | Canada                                                     |
| Cazorzi, Federico                           | Glaciologist and Professor in Hydrology            | University of Udine                                                 | Italy                                                      |
| Ceballos, Leonardo                          | Biology                                            |                                                                     | Italy                                                      |
| Ceballos, Elvira                            | Técnico Especializado de OPIs                      | Instituto Español de Oceanografía                                   | Spain                                                      |
| Ceballos, Gerardo                           | Professor                                          | Universidad Nacional Autonoma de Mexico                             | Mexico                                                     |
| Ceballos Herrero, M <sup>a</sup> Inmaculada | Chemist                                            | Ministry of Education and Science Spaiñ                             | Spain                                                      |
| Cebašek-Travnik, Zdenka                     | Psychiatrist                                       | Councilor                                                           | Slovenia                                                   |
| Cebulska, Klaudia                           | PhD student, Hydrobiology                          | University of Silesia in Katowice                                   | Poland                                                     |
| Ceccarelli, Alessandro                      | Biotech                                            |                                                                     | United Kingdom of Great Britain and Northern Ireland (the) |
| Cecconi, Baptiste                           | Astronomer                                         | Observatoire de Paris                                               | France                                                     |
| Cecil, John                                 | Conservation Biologist                             |                                                                     | United States of America (the)                             |
| Cecilia, Helene                             | PhD student in epidemiological modelling           | INRA                                                                | France                                                     |
| Cedano Villavicencio, Karla                 | Head of Technology Management an Liaison           | Instituto de Energías Renovables - UNAM                             | Mexico                                                     |
| Cederwall, Jeffrey                          | PhD Student, Biology                               | Queen's University                                                  | Canada                                                     |
| Cedrés-Perdomo, Ruymán David                | PhD Student                                        | University of La Laguna                                             | Spain                                                      |
| Ceesau, Adam                                | Conservation                                       |                                                                     | Senegal                                                    |
| Celentano, Danielle                         | Professor                                          | Universidade Estadual do Maranhão (UEMA)                            | Brazil                                                     |
| Céline, Albert                              | PhD Student / Ecotoxicologie                       | LIENSs                                                              | France                                                     |
| Celis-Diez, Juan L.                         | Professor of Conservation Biology                  | Escuela de Agronomía, Pontificia Universidad Católica de Valparaíso | Chile                                                      |
| Cellarius, Richard                          | Emeritus Member of the Faculty                     | The Evergreen State College, Olympia, WA                            | United States of America (the)                             |
| Céleri, Rolando                             | Professor                                          | Universidad de Cuenca                                               | Ecuador                                                    |
| Cendales-Rojas, Lillan Andrea               | Biologist                                          | Universitat de Barcelona                                            | Colombia                                                   |
| Centurión Carrera, Alejandra                | PhD Candidate in Ecology                           | Universität Bremen                                                  | Germany                                                    |
| Cenzano, Ana M.                             | Associate Researcher, CONICET                      | IPEEC-CONICET                                                       | Argentina                                                  |
| Ceola, Serena                               | Assistant Professor                                | University of Bologna                                               | Italy                                                      |
| Cerabolini, Bruno E.L.                      | Full Professor of Environmental and Applied Botany | DBSV - University of Insubria                                       | Italy                                                      |
| Cerdeira, Hilda                             | Physics                                            | Instituto de Física Teórica - IFT-UNESP                             | Brazil                                                     |
| Cerdeira, Louise                            | Research fellow                                    | Usp                                                                 | Brazil                                                     |
| Cereghetti, Eva                             | PhD in Aquatic Ecology                             | University of Zurich                                                | Switzerland                                                |

|                             |                                                                  |                                                                       |                                |
|-----------------------------|------------------------------------------------------------------|-----------------------------------------------------------------------|--------------------------------|
| Cereghino, Regis            | Professor                                                        | University of Toulouse                                                | France                         |
| Cereghino, Paul             | Restoration Ecologist                                            | National Marine Fisheries Service                                     | United States of America (the) |
| Ceron, Karoline             | PhD. candidate in Ecology and Conservation at UFMS               | Universidade Federal do Mato Grosso do Sul                            | Brazil                         |
| Cerqueira, Rui              | Professor of Ecology                                             | Universidade Federal do Rio de Janeiro                                | Brazil                         |
| Cerqueira, Marco            | PhD researcher                                                   | CCMAR                                                                 | Portugal                       |
| Cerqueira, Mário            | Assistant Professor                                              | University of Aveiro                                                  | Portugal                       |
| Cerqueira, Marco            | Researcher Pos-Doc                                               | CCMAR                                                                 | Portugal                       |
| Cerrilla, Cecilia           | Conservation Biology MSc Candidate                               | Fitzpatrick Institute of African Ornithology, University of Cape Town | South Africa                   |
| Cerrillo, Patricia          | Co-founder                                                       | Grupo de Investigación de Mamíferos Marinos A.C.                      | Mexico                         |
| Cerutti, Nicola             | Postdoctoral researcher, Economics                               | University of Verona                                                  | Italy                          |
| Cerutti, Paolo Omar         | Forester                                                         | Center for International Forestry Research (CIFOR)                    | Kenya                          |
| Cerveira Lima, Raul         | Adjunct Professor/ Physics and Light Pollution                   | Escola Superior de Saúde do Politécnico do Porto + CITEUC             | Portugal                       |
| Cervenka, Emily             | Cell and Molecular Biology                                       | Concordia University                                                  | Canada                         |
| Cervera, Maria              | PhD in Neuroinformatics                                          | ETH Zurich                                                            | Switzerland                    |
| César de Sá, Nuno           | PhD on Remote Sensing for nature conservation                    | CML - Leiden University                                               | Netherlands (the)              |
| Ceschia, Eric               | Ecology and remote sensing                                       | INRA                                                                  | France                         |
| Cetinic, Katarina           | PhD                                                              | Trent University                                                      | Canada                         |
| Cezar Geroto, Caio Fabricio | Professor of Paleontology                                        | Universidade Paulista                                                 | Brazil                         |
| CEZILLY, FRANK              | PROFESSOR                                                        | UNIVERSITE DE BOURGOGNE                                               | France                         |
| Chabaud, Chloé              | PhD student in Evolutionary Ecology                              | iEES Paris and CEBC Chizé                                             | France                         |
| Chabert, Eric               | PhD student                                                      | Avignon Université                                                    | France                         |
| Chabert, Ariane             | Lecturer Agroecology and Entomology                              | Toulouse Institut National Polytechnique ENSAT                        | France                         |
| Chaboo, Caroline            | Systematic Entomology                                            | University of Nebraska-Lincoln                                        | United States of America (the) |
| Chabriac, Pierre-Antoine    | Professor in Civil Engineering                                   | Ecole Nationale Supérieure d'Architecture de Bretagne                 | France                         |
| Chacón, M. Gema             | Researcher / Prehistory and Human Evolution                      | IPHES (Institut Català de Paleoecologia Humana i Evolució Social)     | Spain                          |
| Chae, Eunyoung              | Assistant Professor in Biology                                   | National University of Singapore                                      | Singapore                      |
| Chàfer Nicolás, Marta       | PhD Student / Greenery systems for UHI mitigation                | University of Lleida                                                  | Spain                          |
| Chagas, Tássia              | Post doctoral student in Applied Ecology                         | Federal University of Lavras                                          | Brazil                         |
| Chahinian, N                | Hydrologist                                                      | Institut de Recherches pour le Développement (IRD)                    | France                         |
| Chaimovich, Hernan          | Emeritus Professor of Chemistry                                  | Instituto de Química, Universidade de São Paulo                       | Brazil                         |
| Chakarov, Nayden            | Researcher                                                       | Dept. of Animal Behaviour, Bielefeld University                       | Germany                        |
| Chakraborty, Subrata        | Professor, Statistics                                            | Dibrugarh University                                                  | India                          |
| CHAKRABORTY, Avishikta      | PhD student/biological sciences                                  | Monash University                                                     | Australia                      |
| Chakravarthi, Aravin        | PhD (Functional Zoology)                                         | Lund University                                                       | Sweden                         |
| Chalen, Izan                | Molecular Biologist                                              | Universidad San Francisco de Quito USFQ                               | Ecuador                        |
| Challenger, Antony          | Postdoctoral researcher, ecology and environmental public policy | Instituto de Ecologia, S.A.                                           | Mexico                         |
| Chalouni, Cecile            |                                                                  | Genentech                                                             | United States of America (the) |

|                            |                                                    |                                                             |                                                            |
|----------------------------|----------------------------------------------------|-------------------------------------------------------------|------------------------------------------------------------|
| Chaluvadi, Sandeep Kumar   | Postdoctoral researcher/condensed matter physics   | Cnr iom                                                     | Italy                                                      |
| Chamberlain, Kevin         | Geology Research Professor                         | University of Wyoming                                       | United States of America (the)                             |
| Chames, Patrick            | Research director                                  | Cnrs                                                        | France                                                     |
| Champreux, Antoine         | PhD student in Palaeoecology                       | Flinders University (Adelaide)                              | Australia                                                  |
| chan, Moses                | Professor of Physics, Emeritus                     | Penn State University                                       | United States of America (the)                             |
| Chan, Man-pui Sally        | Research Assistant Professor                       | University of Illinois                                      | United States of America (the)                             |
| Chan, Kai                  | Professor, Sustainability and Conservation Science | University of British Columbia                              | Canada                                                     |
| Chan, Kevin                | Associate Professor, Faculty of Medicine           | University of Toronto                                       | Canada                                                     |
| Chan, Edmund               | PhD student in Physics                             | University of Exeter                                        | United Kingdom of Great Britain and Northern Ireland (the) |
| Chanard, Kristel           | Research scientist                                 | IPGP/IGN                                                    | France                                                     |
| Chancellor, Nicholas       | Research fellow                                    | Durham University                                           | United Kingdom of Great Britain and Northern Ireland (the) |
| Chandler, Caroline         | Environmental Scientist                            |                                                             | Peru                                                       |
| Chandrasekaran, Sriikiran  | Graduate student                                   | University of California Irvine                             | United States of America (the)                             |
| Chang, Yuan-Pin            | Associate :Professor                               | Department of Oceanography, National Sun Yat-sen University | Taiwan                                                     |
| Chang, Manyu               | researcher                                         | Federal University of Paraná                                | Brazil                                                     |
| Chani Posse, Mariana       | Researcher                                         | IADIZA - CCT CONICET Mendoza                                | Argentina                                                  |
| Chanut, Pierre             | Ecology                                            | ETH Zurich                                                  | Switzerland                                                |
| Chao, Jung-Tai             | Senior Research Scientist                          | Taiwan Forestry Research Institution                        | Taiwan                                                     |
| CHAOUI EL FAIZ, Kaoutar    | Geosciences                                        | Université de Reims Champagne Ardenne                       | Morocco                                                    |
| Chapelier, Claude          | Physicist                                          | CEA                                                         | France                                                     |
| Chapin, Kenneth            | Postdoctoral Researcher                            | University of Arizona                                       | United States of America (the)                             |
| Chapin, Thomas             | Intern Ecologist                                   | Smithsonian Environmental Research Center                   | United States of America (the)                             |
| Chaplin, Vernon            | Plasma Physicist                                   |                                                             | United States of America (the)                             |
| Chapman, Sarah             | Research Fellow                                    | University of Leeds                                         | United Kingdom of Great Britain and Northern Ireland (the) |
| Chapman, Katy              | Associate Professor and Director of Sustainability | University of Minnesota Crookston                           | United States of America (the)                             |
| Chapman, Laura             | Associate Lecturer in Ecology                      | University of York                                          | United Kingdom of Great Britain and Northern Ireland (the) |
| Chapman AO PhD, Simon      | Emeritus Professor                                 | School of Public Health, University of Sydney               | Australia                                                  |
| Chapuisat, Michel          | Professor - Evolution                              | University of Lausanne                                      | Switzerland                                                |
| Charalambides, George      | Marine Biology                                     | The Scottish Association for Marine Science                 | United Kingdom of Great Britain and Northern Ireland (the) |
| Charalambous, Constantinos | Ecologist                                          |                                                             | Cyprus                                                     |
| Charalambous, Georgia      | Researcher                                         | Charite                                                     | Germany                                                    |
| Charavel, Valerie          | Environmental educator                             | Botanic Garden Meise                                        | Belgium                                                    |
| Charbonnel, Nathalie       | Senior researcher                                  | INRA                                                        | France                                                     |
| Charette, Tania            | Biologist                                          | University of Montreal                                      | Canada                                                     |
| Charguéraud, Arthur        | Researcher in Computer Science                     | Inria                                                       | France                                                     |

|                           |                                                                 |                                                                                    |                                                            |
|---------------------------|-----------------------------------------------------------------|------------------------------------------------------------------------------------|------------------------------------------------------------|
| CHARGUI, Sameh            | Researcher-associate professor                                  | Georesources Laboratory, Water Research and Technology Centre, Borj Cedria Ecopark | Tunisia                                                    |
| Charles, Steve            | Senior Research Scientist                                       | CSIRO                                                                              | Australia                                                  |
| Charles N., Kuria         | Forest Growth and Yield Modeler                                 | Kenya Forest Service                                                               | Kenya                                                      |
| Charli-Joseph, Lakshmi    | Research assistant/Academic technician - Sustainability Science | LANCIS-IE-UNAM                                                                     | Mexico                                                     |
| Charmantier, Anne         | Evolutionary Ecologist                                          | CNRS                                                                               | France                                                     |
| Charpentier, Marie        | Director of researches/Behavioral ecology                       | CNRS                                                                               | France                                                     |
| Charpentier, Mathilde     | Civilian Service, M.D.                                          | Tour du Valat                                                                      | France                                                     |
| CHARPENTIER, Jean Paul    | INGENIEUR RECHERCHE, Forest scientist                           | INRA                                                                               | France                                                     |
| Charrier, Bénédicte       | Research Director                                               | CNRS                                                                               | France                                                     |
| Charrier, Guillaume       | Plant ecophysiologicalist                                       | INRA                                                                               | France                                                     |
| Charrier, N. Pierre       | Ecology and Evolution, PhD                                      | Pôle emploi                                                                        | France                                                     |
| Charrier, Grégory         | Associate professor                                             | University of Brest                                                                | France                                                     |
| CHARRIER, MARYVONNE       | Associate Professor and Ecophysiologicalist                     | University of Rennes 1                                                             | France                                                     |
| Chartier, Christophe      | Professor Cattle Medicine                                       | UMR INRA Oniris                                                                    | France                                                     |
| Chase, Madeline           |                                                                 | Uppsala University                                                                 | Sweden                                                     |
| Chassot, Olivier          | Program Director, Regenerative Costa Rica                       | University for International Cooperation                                           | Costa Rica                                                 |
| Chaste, Pauline           | Psychiatry Genetics                                             | INSERM                                                                             | France                                                     |
| Chateigner, Daniel        | Professor                                                       | Université de Caen Normandie                                                       | France                                                     |
| Chateigner, Aurelien      | Post-doc                                                        | INRA                                                                               | France                                                     |
| Chater, Caspar            | Research Fellow/Plant Science                                   | The University of Sheffield                                                        | United Kingdom of Great Britain and Northern Ireland (the) |
| Chattington, Sophie       | PhD Candidate - Population & Evolutionary Ecology               | University of Bremen                                                               | Germany                                                    |
| Chatzaras, Gerasimos      | Electrical Energy Consumption Analyst                           |                                                                                    | Greece                                                     |
| Chatzistergos, Theodosios | Post Doc Solar Physics                                          | INAF OAR                                                                           | Italy                                                      |
| Chauchard, Sandrine       | Assistant professor - Ecology                                   | Université de Lorraine                                                             | France                                                     |
| Chauhan, Radha            | Scientist                                                       | National Centre for Cell Science                                                   | India                                                      |
| Chaumillon, Eric          | Professor in Marine Geology                                     | University of La Rochelle                                                          | France                                                     |
| Chaumon, Maximilien       | PhD, Research Associate, Neuroscience                           | Brain & Spine Institute (ICM), Paris                                               | France                                                     |
| Chautems, Alain           | Senior Research Associate/Plant Taxonomy                        | Conservatoire et Jardin botaniques de la Ville de Genève                           | Switzerland                                                |
| Chaval, Yannick           | Engineer assistant                                              | French National Institute for Agricultural Research                                | France                                                     |
| Chavan, Sachin            | Research Fellow                                                 | Hawkesbury Institute for the Environment                                           | Australia                                                  |
| Chave, Emmanuelle         | veterinarian                                                    |                                                                                    | France                                                     |
| Chaves, Patricia          | Biologist                                                       | Faculdade de Ciências da Universidade de Lisboa                                    | Portugal                                                   |
| Chavez, John              | Library Faculty - Information Science Division                  | Paradise Valley Community College                                                  | United States of America (the)                             |
| Chavez, Francisco P.      | Assistant Professor                                             | University of Chile                                                                | Chile                                                      |
| Chehébar, Claudio         | Conservation and Wildlife Biologist                             | Administración de Parques Nacionales                                               | Argentina                                                  |
| Chekol, Yeshambel         | Animal Nutritionist                                             | Bahir Dar University                                                               | Ethiopia                                                   |
| Chelliah, Alvin           | Marine scientist                                                | Reef check malaysia                                                                | Malaysia                                                   |

|                          |                                                                             |                                                                |                                                            |
|--------------------------|-----------------------------------------------------------------------------|----------------------------------------------------------------|------------------------------------------------------------|
| Chelton, Dudley          | Emeritus Professor of Oceanic and Atmospheric Sciences                      | Oregon State University                                        | United States of America (the)                             |
| Chemello, Renato         | Associate Professor in Ecology and Conservation Biology                     | Department of Earth and Marine Sciences, University of Palermo | Italy                                                      |
| Chen, Kai                | Lecturer                                                                    | Nanjing Agricultural University                                | China                                                      |
| Chen, Yu                 | Physics Graduate Student                                                    | Penn State University                                          | United States of America (the)                             |
| Chen, Susan              |                                                                             | Illinois State University                                      | United States of America (the)                             |
| Chen, Hua                | Professor of Ecology                                                        | University of Illinois at Springfield                          | United States of America (the)                             |
| Chen, Celia              | Research Professor                                                          | Dartmouth College                                              | United States of America (the)                             |
| Chen, Chaolun Allen      | Research Professor/ Marine Biodiversity                                     | Biodiversity Research Centre, Academia Sinica, Taiwan          | Taiwan                                                     |
| Chen, Xuanlin            | Postdoc                                                                     | MPIDS                                                          | Germany                                                    |
| Chenuil, Anne            | Senior scientist                                                            | CNRS                                                           | France                                                     |
| CHEREL, Yves             | Directeur de recherche                                                      | CNRS                                                           | France                                                     |
| Cheriet, Mohamed         | Full Professor, Sustainable ICT                                             | University of Quebec's Ecole de technologie superieure         | Canada                                                     |
| Cherif, Mehdi            | Associate Professor                                                         | Ecology and Environmental Science Dept, Umeå University        | Sweden                                                     |
| Cherix, Daniel           | Professor/ Ecology                                                          | Departement of Ecology and Evolution, University of Lausanne   | Switzerland                                                |
| Chernicky, Kiley         | Environmental Biology                                                       |                                                                | United States of America (the)                             |
| cherry, jon              | research assistant                                                          | newcastle university                                           | United Kingdom of Great Britain and Northern Ireland (the) |
| Chester, Emily           | Research Associate, Anthropology                                            | Indiana University                                             | United States of America (the)                             |
| Chester, Sheryan Epperly | marine scientist                                                            | retired (U.S. government)                                      | United States of America (the)                             |
| Chester, Charles         | Assistant Adjunct Professor                                                 | Tufts University                                               | United States of America (the)                             |
| Chettri, Nakul           | Sr Biodiversity Specialists and Programme Manager - Transboundary Landscape | International Centre for Integrated Mountain Development       | Nepal                                                      |
| chevalier, laurent       | physicist                                                                   | Université Paris-Saclay                                        | France                                                     |
| Chevalier, Mathieu       | PhD                                                                         | Université de Lausanne                                         | Switzerland                                                |
| CHEVALIER, Patrick       | Professeur en retraite                                                      |                                                                | France                                                     |
| Chevallereau, Anne       | Post-doctoral Researcher / Microbiology                                     | University of Exeter                                           | United Kingdom of Great Britain and Northern Ireland (the) |
| chevallier, stephanie    | Dr                                                                          | INSERM                                                         | France                                                     |
| Chevallier, Damien       |                                                                             | CNRS                                                           | France                                                     |
| Chevallier, Coralie      | Researcher                                                                  | INSERM - ENS                                                   | France                                                     |
| Chèvre, Nathalie         | Lecturer ecotoxicology                                                      | University of Lausanne                                         | Switzerland                                                |
| Cheyne, Louise           | Post doctoral research associate                                            | University of Liverpool                                        | United Kingdom of Great Britain and Northern Ireland (the) |
| Chia, Camille            | Research project manager                                                    | University of California Riverside                             | United States of America (the)                             |
| Chiantore, Mariachiara   | Associate Professor in Ecology                                              | University of Genova                                           | Italy                                                      |
| Chiappa-Carrara, Xavier  | Professor / Coastal Ecology                                                 | Universidad Nacional Autónoma de México                        | Mexico                                                     |

|                       |                                                                           |                                                                                               |                                                            |
|-----------------------|---------------------------------------------------------------------------|-----------------------------------------------------------------------------------------------|------------------------------------------------------------|
| Chiarucci, Alessandro | Full Professor Plant Ecology and Conservation Biology                     | Alma Mater Universitatis - University of Bologna                                              | Italy                                                      |
| Chiavetta, Ugo        | Research scientist                                                        | Council for Agricultural Research and Economics (CREA)                                        | Italy                                                      |
| Chibesa, Moses        | Lecturer - Ecological Sciences                                            | The Copperbelt University, School of Natural Resources                                        | Zambia                                                     |
| Chichorro, Filipe     | PhD Student - Conservation / Ecology                                      | Finnish Museum of Natural History                                                             | Finland                                                    |
| Chidichimo, Maria Paz | Researcher - Physical Oceanography                                        | Consejo Nacional de Investigaciones Científicas y Técnicas (CONICET), Buenos Aires, Argentina | Argentina                                                  |
| Childress, Michael    | Associate Professor of Biological Sciences                                | Clemson University                                                                            | United States of America (the)                             |
| Chillon, Isabel       | Postdoctoral fellow                                                       | EMBL                                                                                          | France                                                     |
| Chin, Jamille         | Urban Planning Consultant                                                 | PR Planner                                                                                    | Jamaica                                                    |
| Chiquetto, Julio      | Post-doctorate researcher                                                 | University of Sao Paulo                                                                       | Brazil                                                     |
| Chiri, Eleonora       | Postdoctoral Research Fellow/Environmental Microbiology                   |                                                                                               | Australia                                                  |
| Chirichella, Roberta  | Postdoc                                                                   | University of Sassari                                                                         | Italy                                                      |
| Chirif, Alberto       | Antropólogo                                                               | Independiente                                                                                 | Peru                                                       |
| Chirivi, Renato       | CSO / drug discovery                                                      |                                                                                               | Netherlands (the)                                          |
| Chiron, François      | Assistant Professor                                                       | Université Paris-Saclay                                                                       | France                                                     |
| Chiron, Catherine     | Director of research (Medicine and Neurosciences)                         | National Institute of Health and Medical Research (INSERM)                                    | France                                                     |
| Chitayat, Adrienne    | Wildlife conservation                                                     | University of Amsterdam                                                                       | United States of America (the)                             |
| Chivers, David        | University Reader Emeritus                                                | Selwyn College, University of Cambridge                                                       | United Kingdom of Great Britain and Northern Ireland (the) |
| Chivian, Eric         | Founder and Former Director, Center for Health and the Global Environment | Harvard Medical School                                                                        | United States of America (the)                             |
| Cho, In-Young         | Researcher                                                                | National Marine Biodiversity Institute of Korea                                               | Korea (the Republic of)                                    |
| Choi, Young-jin       | Politics, Philosophy & Economics (PPE)                                    |                                                                                               | Germany                                                    |
| Choi, Ja Yeon         | Research Scientist / Energy materials                                     | Ballard Power Systems, Inc                                                                    | Canada                                                     |
| Choi, Ryan            | Graduate Student - Ecology                                                | Utah State University                                                                         | United States of America (the)                             |
| CHOI, JE-YONG         | Professor                                                                 | Dept. of Biochemistry and Cell Biology, School of Medicine, Kyungpook National University     | Korea (the Republic of)                                    |
| CHOLER, Philippe      | Senior researcher                                                         | CNRS                                                                                          | France                                                     |
| Cholewińska, Olga     | PhD student, Biology                                                      | Faculty of Biology, University of Warsaw                                                      | Poland                                                     |
| Chong, Ju Lian        | Senior Lecturer/ Conservation Biology                                     | Universiti Malaysia Terengganu                                                                | Malaysia                                                   |
| Chonova, Teofana      | Postdoc                                                                   | INRA, France                                                                                  | France                                                     |
| Choong, Amy           | Lecturer                                                                  | National University of Singapore                                                              | Singapore                                                  |
| Choppin, Marina       | PhD candidate in Evolutionary Biology                                     | Johannes Gutenberg University (IOME)                                                          | Germany                                                    |
| Chopping, Mark        | Professor, Remote Sensing                                                 | Montclair State University                                                                    | United States of America (the)                             |
| Choquet, Marvin       | Postdoctoral position zooplankton population genomics                     | Nord University                                                                               | Norway                                                     |
| Choresch, Yael        | PhD student, Environmental management                                     | University of Haifa                                                                           | Israel                                                     |
| Chouaia, Bessem       | Assistant Professor of Microbiology                                       | Ca' Foscari University of Venice                                                              | Italy                                                      |

|                                |                                                                                                |                                                                                           |                                                            |
|--------------------------------|------------------------------------------------------------------------------------------------|-------------------------------------------------------------------------------------------|------------------------------------------------------------|
| Chow, Fotini                   | Professor, Civil and Environmental Engineering                                                 | University of California, Berkeley                                                        | United States of America (the)                             |
| Chow, Gwendolyn                | Conservation                                                                                   | Resorts World Sentosa - S.E.A.A.                                                          | Singapore                                                  |
| Chowdhry Beeman, Jai           | Doctoral Candidate                                                                             | Institut des Géosciences de l'Environnement / Université Grenoble Alpes                   | France                                                     |
| Chowdhury, Gawsia Wahidunnessa | Associate Professor, Department of Zoology                                                     | University of Dhaka                                                                       | Bangladesh                                                 |
| Chozas, Sergio                 | Post Doc Researcher                                                                            | cE3c - FCUL Lisbon University                                                             | Portugal                                                   |
| Chraïbi, Eric                  | PhD Student - Remote Sensing                                                                   | IRSTEA                                                                                    | France                                                     |
| Chrétien, Emmanuelle           | PhD Candidate, biological sciences                                                             | Université de Montréal                                                                    | Canada                                                     |
| Christensen, Larry             | Former Section Chief                                                                           | Former Minnesota Pollution Control Agency - Retired                                       | United States of America (the)                             |
| Christensen, Charlotte         | PhD student                                                                                    | Swansea University                                                                        | United Kingdom of Great Britain and Northern Ireland (the) |
| Christensen, Mikkel            | Project manager / Aquaculture                                                                  | South West catchments Council                                                             | Australia                                                  |
| Christensen, Dain L.           | Graduate Assistant                                                                             | University of Hawaii                                                                      | United States of America (the)                             |
| christian, ré                  | technicien de laboratoire                                                                      | Institut Méditerranéen d'Océanologie- CNRS                                                | France                                                     |
| Christianini, Alexander        | Associate Professor of Ecology                                                                 | Universidade Federal de São Carlos                                                        | Brazil                                                     |
| Christiansen, Sabine           | Researcher/Biologist                                                                           | IASS                                                                                      | Germany                                                    |
| Christiansen, Henrik           | Marine Biologist                                                                               | KU Leuven                                                                                 | Belgium                                                    |
| Christie, Mary                 | Environmental Scientist                                                                        |                                                                                           | United States of America (the)                             |
| christine, robes               | Ecology, assistant professor                                                                   | aix marseille université                                                                  | France                                                     |
| Christophe, Piscart            | Researcher in Aquatic Ecology                                                                  | CNRS                                                                                      | France                                                     |
| Chu, Ellen W                   | Ecologist and Editor                                                                           | US Government Accountability Office (retired)                                             | United States of America (the)                             |
| Chu, Cindy                     | Freshwater Fish Research Scientist                                                             | Ontario Ministry of Natural Resources and Forestry                                        | Canada                                                     |
| Chua, Elvin                    | Chemistry                                                                                      |                                                                                           | Singapore                                                  |
| Chuard, Pierre                 | Research Associate, Contract Faculty, Ecology                                                  | Bishop's University                                                                       | Canada                                                     |
| Chucholl, Christoph            | Research Scientist                                                                             | Eco Surv                                                                                  | Germany                                                    |
| Chuctaya, Junior               | PhD student in Animal biology                                                                  | Universidade Federal de Rio Grande do Sul                                                 | Brazil                                                     |
| CHUPIN, Clémence               | PHD Student                                                                                    | LIENSs, UMR 7266                                                                          | France                                                     |
| Churski, Marcin                | researcher/ecology                                                                             | MRI PAS Białowieża                                                                        | Poland                                                     |
| Ciais, Philippe                | researcher                                                                                     | CEA LSCE                                                                                  | France                                                     |
| Čiamporová-Zaťovičová, Zuzana  | senior researcher/ freshwater biology                                                          | Slovak Academy of Sciences, Plant Science and Biodiversity Centre                         | Slovakia                                                   |
| Cianciaruso, Marcus            | Associate Professor in Ecology and Evolution                                                   | Universidade Federal de Goiás                                                             | Brazil                                                     |
| Cianferoni, Fabio              | Entomology                                                                                     | National Research Council of Italy & Natural History Museum of the University of Florence | Italy                                                      |
| CIBIEL, Agnès                  | Project leader in Biology                                                                      |                                                                                           | France                                                     |
| Cibois, Alice                  | Researcher, Ornithology                                                                        | Natural History Museum of Geneva                                                          | Switzerland                                                |
| Ciccarese, Lorenzo             | Head of Division for Species and Habitat Conservation and Sustainable Agriculture and Forestry | National Institute for Environmental Protection and Research                              | Italy                                                      |
| Cid Puey, Nuria                | Postdoctoral researcher in freshwater ecology                                                  | IRSTEA                                                                                    | France                                                     |
| Ciechowska, Helena             | Geophysics in Geology                                                                          | University of Warsaw                                                                      | Poland                                                     |
| Ciftci, Ozan                   | Molecular Ecology                                                                              | Institute of Environmental Sciences                                                       | Netherlands (the)                                          |

|                         |                                                                 |                                                     |                                                            |
|-------------------------|-----------------------------------------------------------------|-----------------------------------------------------|------------------------------------------------------------|
| Cinta, Claudia          | Master Science in Conservacion and environmentalbresources      | Private practice and research in a non profit       | Mexico                                                     |
| Cipriani, Florent       | Engineer, instrumentation for structural biology                | European Molecular Biology Laboratory               | France                                                     |
| Cirulis, Aivars         | PhD student in Evolutionary Ecology                             | Lund University                                     | Sweden                                                     |
| Cisek, Stevie           | Wildlife Educator                                               |                                                     | United States of America (the)                             |
| Cisneros, Laura         | Assistant Extension Professor/Ecology & Environmental Education | University of Connecticut                           | United States of America (the)                             |
| Cisneros-Heredia, Diego | Professor                                                       | Universidad San Francisco de Quito USFQ             | Ecuador                                                    |
| Cisse, Ramata           | Assistant Professor of Biology                                  | Georgia Gwinnett College                            | United States of America (the)                             |
| Cittadino, Federica     | Senior Researcher in Environmental Law                          | Eurac Research                                      | Italy                                                      |
| Civantos, Emilio        | Postdoctoral Fellow                                             | CIBIO-InBIO                                         | Portugal                                                   |
| Claessens, Antoine      | Principal Investigator, Biology                                 | University of Montpellier                           | France                                                     |
| Claessens, Frank        | Profesor Cell Biology                                           | KU Leuven                                           | Belgium                                                    |
| Clair, Guillaume        |                                                                 | EAWAG                                               | Switzerland                                                |
| Clair, Bruno            | Directeur de recherche, Tree biomechanics and wood sciences     | CNRS                                                | France                                                     |
| Claire-Anne, BAUDIN     | Professeur théologie                                            | Facultés jésuites de Paris                          | France                                                     |
| Claireau, Fabien        | Head of Research and Development, Dr. in biology conservation   | Naturalia Environnement                             | France                                                     |
| Clancy, Barbara         | Neuroscience                                                    | University of Central Arkansas                      | United States of America (the)                             |
| Clappe, Sylvie          | Statistical Ecology                                             | University of Lyon                                  | France                                                     |
| Clarizia, Alberto       | assistant professor Physics                                     | University of Napoli "Federico II"                  | Italy                                                      |
| Clark, Matthew          | Human-Environment Systems                                       | Boise State University                              | United States of America (the)                             |
| Clark, Deborah          | Plant Ecologist, Retired                                        | Oregon State University                             | United States of America (the)                             |
| Clark, Liam             | Geography                                                       | University of Nottingham                            | United Kingdom of Great Britain and Northern Ireland (the) |
| Clark, Chris            | Assistant Professor, Biology                                    | University of California, Riverside                 | United States of America (the)                             |
| Clark, Gary             | Lecturer                                                        | La Trobe University                                 | Australia                                                  |
| CLARK, MALCOLM          | ENVIRONMENTAL CHEMIST                                           | COMMONWEALTH SCIENTIFIC LTD                         | Canada                                                     |
| Clarke, Anna-Belle      | Microbiology                                                    |                                                     | Australia                                                  |
| Clarke, Esther          | Primatologist                                                   | MIT                                                 | United States of America (the)                             |
| Clarke, Ian             | Dean, Faculty of Liberal Arts & Sciences                        | OCAD University                                     | Canada                                                     |
| Clarke, Antoine         | Data Analyst                                                    | The Hospital for Sick Children                      | Canada                                                     |
| Clarke, David           | Ecology                                                         | Monash University                                   | Australia                                                  |
| Clarke, Michael         | Professor / Public Health                                       | Western University, London, ON. Canada              | Canada                                                     |
| Class, Barbara          | Post-doctoral researcher                                        | University of Turku                                 | Finland                                                    |
| claude, julien          | Maître de conférences / Evolutionary Biology                    | Institut des Sciences de l'Evolution de Montpellier | France                                                     |
| Claude, Christelle      | Assistant Professor                                             | Aix-Marseille University                            | France                                                     |
| Clause, Adam G.         | Postdoctoral Researcher                                         | Natural History Museum of Los Angeles County        | United States of America (the)                             |
| Claussen, Julie         | Fisheries Biologist                                             | Fisheries Conservation Foundation                   | United States of America (the)                             |

|                             |                                                                     |                                                                                                           |                                                            |
|-----------------------------|---------------------------------------------------------------------|-----------------------------------------------------------------------------------------------------------|------------------------------------------------------------|
| Claussen, Angelika          | Medical doctor                                                      | European regional vice president of IPPNW<br>(International Physicians for the prevention of Nuclear War) | Germany                                                    |
| Clauzon, Victor             | PhD student in hydrogeology                                         | HydroSciences Montpellier                                                                                 | France                                                     |
| CLAUZON, VICTOR             | PhD                                                                 | Université de Montpellier                                                                                 | France                                                     |
| Clavijo, Laura              | Head of botanical research                                          | Botanical Garden "Joaquin Antonio Uribe" Medellin                                                         | Colombia                                                   |
| Clavijo Rojas, Diana Isabel | PhD Student/ Socio-environmental Scientist                          | University of São Paulo                                                                                   | Brazil                                                     |
| Clay, Roger                 | Professor of Physics                                                | University of Adelaide                                                                                    | Australia                                                  |
| Clayer, Francois            | Researcher                                                          | Norwegian Institute for Water Research                                                                    | Norway                                                     |
| Cleary, Michelle            | Associate Professor, Forest Pathologist                             | Swedish University of Agricultural Sciences                                                               | Sweden                                                     |
| Cleaveland, Malcolm         | Professor Emeritus of Geosciences                                   | Univ. of Arkansas-Fayetteville                                                                            | United States of America (the)                             |
| Clemens, Robert             | Ornithology                                                         |                                                                                                           | Australia                                                  |
| Clement, Charles Roland     | Senior Researcher, Historical Ecology                               | Instituto Nacional de Pesquisas da Amazonia                                                               | Brazil                                                     |
| Clément, Jean-Christophe    | Professor in Ecology                                                | Université Savoie Mont Blanc                                                                              | France                                                     |
| Clements, Jodie             | Conservationist                                                     | The Wildfowl and Wetlands Trust                                                                           | United Kingdom of Great Britain and Northern Ireland (the) |
| Clements, Jen               |                                                                     | University of Exeter                                                                                      | United Kingdom of Great Britain and Northern Ireland (the) |
| Clements, Hayley            | Postdoctoral Research Fellow                                        | Centre for Complex Systems in Transition,<br>Stellenbosch University                                      | South Africa                                               |
| Clerc, Estelle              | PhD student                                                         | ETH Zurich                                                                                                | Switzerland                                                |
| Clerissi, Camille           | Assistant professor                                                 | Ecole Pratique des Hautes Etudes                                                                          | France                                                     |
| Cleveland, David A          | Research Professor, Food-Environment-Health-Equity Nexus            | U of California, Santa Barbara                                                                            | United States of America (the)                             |
| Clevers, Jan                | Associate Professor Remote Sensing                                  | Wageningen University                                                                                     | Netherlands (the)                                          |
| Clewett, James              | Physicist working on power generation and motor usage efficiency.   | Hirst Magnetic Instruments Ltd/ University of Exeter                                                      | United Kingdom of Great Britain and Northern Ireland (the) |
| Climent, José M.            | Tenured Scientist in Forest Genetics & Evolution                    | INIA, Forest research Centre                                                                              | Spain                                                      |
| CLINORI, SILVIA             | TRAINEE - WASTE MANAGEMENT                                          | A&T2000 S.p.A.                                                                                            | Italy                                                      |
| Clinton, Richard            | Professor Emeritus of Political Science                             | Oregon State University                                                                                   | United States of America (the)                             |
| Cliquet, Robert             | emeritus professor in anthropology and sociobiology                 | Ghent University                                                                                          | Belgium                                                    |
| Clisby, Megan               | Veterinarian                                                        | Small animal veterinarian                                                                                 | Australia                                                  |
| Cloern, James               | Emeritus Senior Scientist                                           | USGS                                                                                                      | United States of America (the)                             |
| Clothier, Brent             | Scientist                                                           | New Zealand Institute for Plant & Food Research                                                           | New Zealand                                                |
| CLOUAIRE, Thomas            | Researcher in Molecular Biology                                     | Université Paul Sabatier- Toulouse III                                                                    | France                                                     |
| CLOUET-D'ORVAL, Beatrice    | Director of Research                                                | CNRS                                                                                                      | France                                                     |
| Cloutier, Louise            | Entomologist                                                        | Université de Montréal                                                                                    | Canada                                                     |
| Clymer, Roy                 | Medical Psychology                                                  | Deployment Health Clinical Center, WRAMC                                                                  | United States of America (the)                             |
| Cobb, Alexander             | Principal Research Scientist, tropical peatland ecosystem processes | Singapore-MIT Alliance for Research and Technology                                                        | Singapore                                                  |
| Cobo, Fernando              | PhD. Biology. Director of the Hydrobiological Fiel Station          | University of Santiago de Compostela                                                                      | Spain                                                      |

|                      |                                                                                                                          |                                                                         |                                                            |
|----------------------|--------------------------------------------------------------------------------------------------------------------------|-------------------------------------------------------------------------|------------------------------------------------------------|
| COCHARD, Hervé       | Directeur de Recherche                                                                                                   | Inra                                                                    | France                                                     |
| Cock, J. Mark        | Scientist                                                                                                                | Station Biologique de Roscoff                                           | France                                                     |
| Cockroft, Robert     | Ecotoxicologist                                                                                                          |                                                                         | United Kingdom of Great Britain and Northern Ireland (the) |
| Cocucci, Andrea      | Researcher at the National Research Council (CONICET) at the Universidad Nacional de Córdoba (UNC). Evolutionary Biology | Instituto Multidisciplinario de Biología Vegetal. IMBIV (CONICET-UNC)   | Argentina                                                  |
| Codeço, Claudia      | Full Researcher in Public Health                                                                                         | Oswaldo Cruz Foundation                                                 | Brazil                                                     |
| Coelho, Sara         | MS in Ecology                                                                                                            | Instituto Nacional de Pesquisas da Amazônia                             | Brazil                                                     |
| Coenda, Valeria      | Dr. in Astronomy                                                                                                         | Observatorio Astronómico de Córdoba - IATE (Conicet -UNC)               | Argentina                                                  |
| Coetzee, Marina      | Senior Lecturer; Soil scientist                                                                                          | Namibia University of Science & Technology                              | Namibia                                                    |
| Coffroth, Mary Alice | Professor - Marine Ecology                                                                                               | University at Buffalo                                                   | United States of America (the)                             |
| Cofré, Hernán        | Adjunt Professor, Science Education                                                                                      | Pontificia Universidad Católica de Valparaíso                           | Chile                                                      |
| Coggeshall, K.Mark   | Member                                                                                                                   | Oklahoma Medical Research Foundation                                    | United States of America (the)                             |
| Coghlan, Amy         | PhD Candidate                                                                                                            | Institute for Marine and Antarctic Studies                              | Australia                                                  |
| Cogné, Nathan        | Geology                                                                                                                  | Université Rennes                                                       | France                                                     |
| Cohen, Yann          | Postdoc in atmospheric chemistry                                                                                         | CNRS                                                                    | France                                                     |
| Cohen, Mike          | Ecologist                                                                                                                | CEN IEM Unit                                                            | South Africa                                               |
| Cohen, Matthew       | Assistant Professor, Sustainability Science                                                                              | Furman University                                                       | United States of America (the)                             |
| Cohen, Hamutahl      | Postdoctoral Researcher                                                                                                  | University of California, Riverside                                     | United States of America (the)                             |
| Coillot, Christophe  | Research Engineer                                                                                                        | CNRS                                                                    | France                                                     |
| Coimbra, Zulmira H.  | PhD in Ecology                                                                                                           | Universidade Federal do Rio de Janeiro                                  | Portugal                                                   |
| Coke, Maïra          | Research technician                                                                                                      | INRA                                                                    | France                                                     |
| Colaço, M. Conceição | Researcher on social dimension of wildfires                                                                              | Instituto Superior de Agronomia - University of Lisbon                  | Portugal                                                   |
| Colangelo, Paolo     | Researcher                                                                                                               | National Research Council, Research Institute on Terrestrial Ecosystems | Italy                                                      |
| Colardyn, Lieven     | Sustainable Tourism Development                                                                                          | Thomas More - KULeuven                                                  | Belgium                                                    |
| Colas, François      | Oceanography                                                                                                             | IRD                                                                     | France                                                     |
| Colbert, Damon       | Research Associate                                                                                                       | Plant and Food Research                                                 | New Zealand                                                |
| Colcombet, Jean      |                                                                                                                          | INRA                                                                    | France                                                     |
| Coldsnow, Kayla      | PhD Student                                                                                                              | Rensselaer Polytechnic Institute                                        | United States of America (the)                             |
| Cole, David          | Solar-terrestrial Physics                                                                                                | Former Director National Radio and Space Weather Services               | Australia                                                  |
| Cole, Lydia          | Postdoctoral Research Fellow, Tropical Peatland Ecology and Conservation                                                 | University of St Andrews                                                | United States of America (the)                             |
| Cole, Aaron          | Senior GIS Programmer/Analyst                                                                                            | University of California, Santa Cruz                                    | United States of America (the)                             |
| Cole, Emma-Louise    | Research assistant                                                                                                       | Swansea university                                                      | United Kingdom of Great Britain and Northern Ireland (the) |
| Cole, Rebecca        | Science Director                                                                                                         | Osa Conservation                                                        | Costa Rica                                                 |
| Cole, Christopher    | Professor Emeritus, Biology                                                                                              | University of Minnesota, Morris                                         | United States of America (the)                             |
| Cole, Nik            | Conservation Biologist                                                                                                   | Durrell Wildlife Conservation Trust                                     | Mauritius                                                  |

|                              |                                                                |                                                        |                                                            |
|------------------------------|----------------------------------------------------------------|--------------------------------------------------------|------------------------------------------------------------|
| Cole, Milton                 | Distinguished Professor of Physics Emeritus                    | Penn State University                                  | United States of America (the)                             |
| Coleman, Joanna              | Senior Lecturer, Environmental Studies                         | National University of Singapore                       | Singapore                                                  |
| Coleman, David               | Research Professor of Ecology                                  | retired                                                | United States of America (the)                             |
| Coleman, Arthur              | Aquatic biology & Entomology, Private Environmental Consultant | 1948                                                   | United States of America (the)                             |
| Coleman, Raphaël             | Field zoology / Tropical conservation biology                  | Mr                                                     | United Kingdom of Great Britain and Northern Ireland (the) |
| Coles, PhD, Jonathan Ainsley | Biophysics                                                     | University of Glasgow                                  | United Kingdom of Great Britain and Northern Ireland (the) |
| Colesie, Claudia             | Lecturer Plant eco-physiology                                  | University of Edinburgh                                | United Kingdom of Great Britain and Northern Ireland (the) |
| Colgan, Thomas               | Postdoctoral researcher                                        | University College Cork                                | Ireland                                                    |
| COLIN, Fabrice               | Vice-président of the IRD scientific council                   | IRD                                                    | France                                                     |
| colinas, carlos              | Professor of Forest Pathology                                  | University of Lleida                                   | Spain                                                      |
| Coll, Lluís                  | Associate Professor                                            | University of Lleida                                   | Spain                                                      |
| Colla, Sheila                | Assistant Professor                                            | York University, Environmental Studies                 | Canada                                                     |
| Collado Vides, Ligia         | Teaching Professor Marine Biology Phycologist                  | Florida International University                       | United States of America (the)                             |
| Collado-Vides, Ligia         | Senior Lecturer-Researcher                                     | Florida International University                       | United States of America (the)                             |
| Collalti, Alessio            | Researcher forest ecology                                      | National Research Council of Italy                     | Italy                                                      |
| Collazo, Anja Maria          | Lecturer, Environmental Sociology                              | Kyoto University                                       | Japan                                                      |
| Collet, Lila                 |                                                                | Irstea                                                 | France                                                     |
| Colleti, Carolina            | Masters degree                                                 | UNICAMP                                                | Brazil                                                     |
| Collette, Fabienne           | Researcher - Neuroscience                                      | Liege University                                       | Belgium                                                    |
| Colli-Silva, Matheus         | Master student                                                 | Institute of Biosciences, University of São Paulo      | Brazil                                                     |
| Collignon, Romain            | Ph.D Student                                                   | CNRS                                                   | France                                                     |
| Collin, Antoine              | Associate professor                                            | Ecole Pratique des Hautes Etudes, PSL Université Paris | France                                                     |
| Colling, Guy                 | Head of research unit / Population biology & evolution         | Musée national d'histoire naturelle Luxembourg         | Luxembourg                                                 |
| Collingwood, Teghan          | Research Assistant/ Ecology                                    | The University of Queensland                           | Australia                                                  |
| Collins, Katie               | Freshwater ecologist                                           | Department of Conservation                             | New Zealand                                                |
| Collins, Terrence            | Teresa Heinz Professor of Green Chemistry                      | Carnegie Mellon University                             | United States of America (the)                             |
| Collins, Ben                 | Retired Science Teacher (14-18) Director Education             | DFES                                                   | United Kingdom of Great Britain and Northern Ireland (the) |
| Collison, David              | Professor Emeritus                                             | University of Dundee                                   | United Kingdom of Great Britain and Northern Ireland (the) |
| Collomb, Hélène              | Optical research engineer                                      | CNRS                                                   | France                                                     |
| Collot, Johann               | Professor in physics                                           | University Grenoble Alpes                              | France                                                     |
| Colmenares, Pio              | Museum Specialist                                              | American Museum of Natural History                     | United States of America (the)                             |
| Colmenares, Sara             | Doctor in Ecology                                              | Pelecanus SAS                                          | Colombia                                                   |
| Colombi, Victor Hugo         | Teacher                                                        | Estado do Espírito Santo                               | Brazil                                                     |
| Colomer, Jordi               | Professor Physics                                              | University of Gioma                                    | Spain                                                      |
| Colón, Jorge                 | Professor of Chemistry                                         | University of Puerto Rico                              | Puerto Rico                                                |
| Colosi, Joseph               | Associate Professor of Biology                                 | DeSales University                                     | United States of America (the)                             |

|                               |                                                                     |                                                                                    |                                                            |
|-------------------------------|---------------------------------------------------------------------|------------------------------------------------------------------------------------|------------------------------------------------------------|
| Colprim, Jesus                | Associate professor, Chemical engineering                           | LEQUIA, University of Girona                                                       | Spain                                                      |
| Colunga-GarciaMarin, Patricia | Miembro Regular                                                     | Academia Mexicana de Ciencias                                                      | Mexico                                                     |
| Comas, Joaquim                | Associate Professor / Environmental Engineering                     | University of Girona                                                               | Spain                                                      |
| Comay, Orr                    | Postdoctoral Fellow, Ecology                                        | Tel Aviv University                                                                | Israel                                                     |
| Combes, Magali                | Marine Ecology                                                      | IFREMER                                                                            | France                                                     |
| Combet, Emmanuel              | Economist                                                           | French Environmental and energy management Agency (ADEME)                          | France                                                     |
| Combosch, David               | Assistant Professor of Population Genetics                          | University of Guam                                                                 | Guam                                                       |
| Comeau, André                 | Plant geneticist                                                    | BIONOR SYSTEMIQ INC.                                                               | Canada                                                     |
| Comeau, Andre                 | Ph. D. (plant geneticist)                                           | BIONOR SYSTEMIQ INC                                                                | Canada                                                     |
| Comezzi, Francesco Giovanni   | MRes (current PhD candidate) in biology                             | University of Tasmania (Australia)                                                 | Italy                                                      |
| Cominetti, Roberto            | Full Professor / Mathematics                                        | Universidad Adolfo Ibanez                                                          | Chile                                                      |
| Commenges, Daniel             | Director of Research Emeritus, Biostatistics                        | INSERM                                                                             | France                                                     |
| Comte, Sebastien              | Research Officer                                                    | NSW Department of Industry                                                         | Australia                                                  |
| CONAN, Pascal                 | professor in Oceanography                                           | Sorbonne Université                                                                | France                                                     |
| Concepción, Elena D           | Postdoctoral researcher Ecology                                     | National Museum of Natural Sciences, Spanish National Research Council (MNCN-CSIC) | Spain                                                      |
| Condamine, Fabien             | Research scientist                                                  | CNRS                                                                               | France                                                     |
| Conde-Porcuna, José María     | Associate Professor (Dept. of Ecology)                              | University of Granada                                                              | Spain                                                      |
| Condell, Kelsey               | Environmental scientist                                             |                                                                                    | United States of America (the)                             |
| Cone, Randall                 | Associate Professor of Mathematics and Computer Science             | Salisbury                                                                          | United States of America (the)                             |
| Conenna, Irene                | PhD candidate, Ecology                                              | University of Helsinki                                                             | Finland                                                    |
| Conesa, José Javier           | Postdoctoral structural biology                                     | Spanish National Center for Biotechnology                                          | Spain                                                      |
| Conklin, Jesse                | Post-doctoral Researcher                                            | Conservation Ecology Group, University of Groningen                                | Netherlands (the)                                          |
| Conklin, Emily                | PhD Student, Zoology                                                | University of Hawai ‘i at Mānoa                                                    | United States of America (the)                             |
| Conley, Margaret              | Ph.D. Graduate Student in Physical Oceanography                     | Oregon State University                                                            | United States of America (the)                             |
| Connell, Thomas               | Research Associate in Plant Biotechnology                           | KWS SAAT                                                                           | United States of America (the)                             |
| Connor, Michael               | Molecular Biology                                                   | Retired                                                                            | United States of America (the)                             |
| Connor, Rebecca               | Applied Animal Behaviour                                            | Unitec Institute of Technology                                                     | New Zealand                                                |
| Connor, Adele                 | Research Assistant                                                  | University College Dublin                                                          | Ireland                                                    |
| Conole, Daniel                | Post Doctoral Research Associate in Chemical Biology                | Imperial College London                                                            | United Kingdom of Great Britain and Northern Ireland (the) |
| Conrad-Billroth, Clara        | PhD Student (Physics/Molecular Biology)                             | University of Vienna                                                               | Austria                                                    |
| Conroy, Michael               | Wildlife Ecology and Management                                     | University of Georgia                                                              | United States of America (the)                             |
| Consoli, Gabriele             | Phd                                                                 | ETH Zurich                                                                         | Switzerland                                                |
| Consorte-McCrea, Adriana      | Conservation Biology                                                | Canterbury Christ Church University                                                | United Kingdom of Great Britain and Northern Ireland (the) |
| Constantinou, Angelos         | Principal Investigator                                              | Institut of Human Genetics, CNRS, Université de Montpellier                        | France                                                     |
| Conte, Andrea                 | Environmental Engineer PhD - Nature Based Solutions and Climate Art | University of Bologna and Climate Art Project                                      | Italy                                                      |

|                                  |                                                              |                                                                       |                                                            |
|----------------------------------|--------------------------------------------------------------|-----------------------------------------------------------------------|------------------------------------------------------------|
| Conteddu, Kimberly               | Research Master                                              | University College Dublin                                             | Ireland                                                    |
| Contreras, Osvaldo               | Postdoctoral Scientists                                      | Pontificia Universidad Católica de Chile                              | Chile                                                      |
| Contreras Fernández, José Miguel | Entomologist                                                 | ONG Grupo Salvaje                                                     | Chile                                                      |
| Conversi, Daniele                | Professor                                                    | University of the Basque country/IKERBASQUE foundation for science    | Spain                                                      |
| Conway, Rebecca                  | Environmental Science and Policy                             | George Mason University                                               | United States of America (the)                             |
| Coogan, Sean                     | Postdoctoral Fellow                                          | University of Alberta                                                 | Canada                                                     |
| Cook, Neil                       | Postdoc Astrophysics                                         | Universite de Montreal                                                | Canada                                                     |
| Cook, Lauren                     | Post-doctoral researcher                                     | Eawag                                                                 | Switzerland                                                |
| Cook, Simon                      | Lecturer in Physical Geography                               | University of Dundee                                                  | United Kingdom of Great Britain and Northern Ireland (the) |
| Cook, Freeman                    | Environmental Physicist                                      | Freeman Cook & Associates                                             | New Zealand                                                |
| Cook, Jon                        | Doctor of Anthropology                                       | retired                                                               | France                                                     |
| Cook, Timothée                   | Research Associate, Ecology                                  | FitzPatrick Institute of African Ornithology, University of Cape Town | South Africa                                               |
| Cook, Joseph                     | Professor of Biology                                         | University of New Mexico                                              | United States of America (the)                             |
| Cook, James                      | Professor of Entomology                                      | Western Sydney University                                             | Australia                                                  |
| Cook, Rebecca                    | Botany and Environmental Science                             | The University of Memphis                                             | United States of America (the)                             |
| COOK-DARZENS, Solange Cook       | Psychologist                                                 | Affiliated with Robert Debré Hospital                                 | France                                                     |
| Cooke, John                      | Emeritus Professor Environmental Biology                     | University of KwaZulu Natal                                           | South Africa                                               |
| Cooke, Charlotte                 | Marine biologist                                             | University of portsmouth                                              | United Kingdom of Great Britain and Northern Ireland (the) |
| Cools, Jan                       | Research Coordinator Environment and Sustainable Development | University of Antwerp                                                 | Belgium                                                    |
| Coomes, Jenny                    | PhD Student                                                  | University College Cork                                               | Ireland                                                    |
| Coop, Jonathan                   | Professor of Biology and Environment & Sustainability        | Western Colorado University                                           | United States of America (the)                             |
| Cooper, Crispin                  | Theoretical Chemist                                          |                                                                       | United Kingdom of Great Britain and Northern Ireland (the) |
| Cooper, Paul David               | A/Prof, Critical Care Medicine                               | University of Tasmania & Royal Hobart Hospital                        | Australia                                                  |
| Cooper, Rebecca                  | biophysics                                                   |                                                                       | United States of America (the)                             |
| Cooper, Joshua                   | Professor, Mathematics                                       | University of South Carolina                                          | United States of America (the)                             |
| Cooper, David                    | Doctor of Science, Audiology                                 |                                                                       | United States of America (the)                             |
| Cooper, Arthur                   | Professor Emeritus of Forestry                               | North Carolina State University                                       | United States of America (the)                             |
| Cooper, James                    | Professor Retired/Avian Ecology                              | University of Minnesota Twin Cities                                   | United States of America (the)                             |
| Cooper, Jim                      | Professor Emeritus/Avian Ecologist                           | University of Minnesota                                               | United States of America (the)                             |
| Cooreman-Algoed, Margot          | PhD reseracher                                               | Ghent University                                                      | Belgium                                                    |
| Copley, Darren                   | Independent Researcher                                       |                                                                       | Canada                                                     |
| Copley, Claudia                  | Entomologist                                                 | Royal BC Museum                                                       | Canada                                                     |
| Coppens, Els                     | Senior Research Associate                                    | Ablynx, a Sanofi Company                                              | Belgium                                                    |
| Coquillard, Patrick              | Associate Prof. Environmental sciences                       | Université de Nice                                                    | France                                                     |

|                                    |                                                           |                                                                                                                     |                                                            |
|------------------------------------|-----------------------------------------------------------|---------------------------------------------------------------------------------------------------------------------|------------------------------------------------------------|
| Corazza, Rosana                    | Associate Professor - Science, Technology and Environment | Science and Technology Policy Department and Graduate Program - Geosciences Institute/ State University of Campinas | Brazil                                                     |
| Corbani, Aude                      | Ecology and environment management                        | Ministry of agriculture                                                                                             | France                                                     |
| Corbara, Bruno                     | Maître de Conférences Ecology /Behavioral ecology         | Université Clermont Auvergne                                                                                        | France                                                     |
| Corbett, Catherine                 | Chief Scientist                                           | Lower Columbia Estuary Partnership                                                                                  | United States of America (the)                             |
| Corbierre, Muriel                  | Science teacher                                           | Csc Mon Avenir                                                                                                      | Canada                                                     |
| Corbin, Emma                       | PhD Student - Cancer Research                             | Newcastle University                                                                                                | United Kingdom of Great Britain and Northern Ireland (the) |
| Corbin, Jeffrey                    | Professor of Biological Sciences                          | Union College                                                                                                       | United States of America (the)                             |
| Cordeiro, Olga                     | Immunologist                                              |                                                                                                                     | Portugal                                                   |
| Cordeiro, Ana                      | PhD student in Ecology                                    | Centre for Environmental and Marine Studies (CESAM), University of Lisbon                                           | Portugal                                                   |
| Cordeiro Vale Pereira, João Manuel | PhD student in Forest Ecology                             | Albert-Ludwigs-Universität Freiburg                                                                                 | Germany                                                    |
| Cordero, Gerardo Antonio           | Postdoc                                                   | University of Tuebingen                                                                                             | Germany                                                    |
| Cordero Rivera, Adolfo             | Professor of Ecology                                      | University of Vigo                                                                                                  | Spain                                                      |
| Cordes, Andrea                     | PhD Student, Biophysical Chemistry                        | Institute of Physical Chemistry, Georg-August-Universität Göttingen                                                 | Germany                                                    |
| Cordes, David                      | Associate Professor of Chemistry                          | Pacific University                                                                                                  | United States of America (the)                             |
| Cordova, Mario                     | Climate Physics MSc                                       | Utrecht University                                                                                                  | Ecuador                                                    |
| Coriat, Mickael                    | Astrophysicist                                            | IRAP                                                                                                                | France                                                     |
| corinne, BROSSE-QUILGARS           | ingénieur                                                 | IRTEA                                                                                                               | France                                                     |
| Coristine, Laura                   | Science Policy                                            | Environment and Climate Change Canada                                                                               | Canada                                                     |
| Corkill, Matthew                   | Marine and Antarctic Science                              | Institute for Marine and Antarctic Studies                                                                          | Australia                                                  |
| Cormon, Xochitl                    | PhD in marine ecology and fishery science                 | Univeristy of Hamburg                                                                                               | Germany                                                    |
| Cornejo, Flora                     | Biologia                                                  | ITSOEH                                                                                                              | Mexico                                                     |
| Cornejo Latorre, Cristian          | Biologist                                                 | Universidad Autónoma del Estado de Hidalgo                                                                          | Mexico                                                     |
| Cornelisse, Tara                   | Senior Scientist                                          | Center for Biological Diversity                                                                                     | United States of America (the)                             |
| Cornelius, Jonathan                |                                                           | World Agroforestry                                                                                                  | Australia                                                  |
| Cornes, Pam                        | Botany compliance officer                                 | University of Otago                                                                                                 | New Zealand                                                |
| Cornic, Gabriel                    | Honorary professor. Biology                               | Université Paris Saclay, ESE institute, Orsay 91405                                                                 | France                                                     |
| Cornille, Amandine                 | CNRS researcher                                           | CNRS                                                                                                                | France                                                     |
| Cornu, Catherine                   | Research physician                                        | Hospices Civils de Lyon                                                                                             | France                                                     |
| Cornwall, Christopher              | Rutherford Discovery Fellow/marine climate change         | Victoria University of Wellington                                                                                   | New Zealand                                                |
| Corrado, Amanda                    | POS DOC                                                   | UFOP                                                                                                                | Brazil                                                     |
| Corral, Teresa                     | Biomedical researcher                                     | Instituto de Salud Carlos III                                                                                       | Spain                                                      |
| Correa, Cristian                   | Adjunct Professor, Evolutionary Ecology                   | Universidad Austral de Chile                                                                                        | Chile                                                      |
| Correa, Diego F.                   | PhD.                                                      | The University of Queensland                                                                                        | Australia                                                  |
| CORREA ARANGO, IVAN D              | Geologist Engineer                                        | CONSULTANT                                                                                                          | Colombia                                                   |
| Corrêa da Silva, Edson             | Professor/Physicist                                       | North Fluminense State University                                                                                   | Brazil                                                     |
| Correia, Katie                     | Marine Scientist                                          | The Central Caribbean Marine Institute                                                                              | Cayman Islands (the)                                       |

|                          |                                                       |                                                                                                 |                                                            |
|--------------------------|-------------------------------------------------------|-------------------------------------------------------------------------------------------------|------------------------------------------------------------|
| Correia, Barbara         | Agri-Tech Development Scientist/Applied Biology       | UWE Bristol                                                                                     | United Kingdom of Great Britain and Northern Ireland (the) |
| Corroyer-Dulmont, Simon  | Engineer                                              | Institut Pasteur                                                                                | France                                                     |
| Cortázar chinarro, Maria | Post doc                                              | Uppsala university                                                                              | Sweden                                                     |
| Cortes, Marina           | Emmy Noether Fellow                                   | Perimeter Institute                                                                             | Canada                                                     |
| CORTES-AVIZANDA, AINARA  | POSTDOC BIODIVERSITY CONSERVATION                     | CSIC                                                                                            | Spain                                                      |
| CORTES-GOMEZ, Adriana    | Post doc fellow                                       |                                                                                                 | Mexico                                                     |
| Cortés-Ramos, Jorge      | Researcher/Climatology                                | CONACYT-Centro de Investigación Científica y de Educación Superior de Ensenada, Baja California | Mexico                                                     |
| Cortés-Rivera, Cristian  | Phd (c) in Developmental Sciences and Psychopathology | Universidad del Desarrollo                                                                      | Chile                                                      |
| Cortesi, Fabio           | UQ Development Fellow - Biology                       | The University of Queensland                                                                    | Australia                                                  |
| Corti, Paulo             | Associate Professor / Wildlife Ecology                | Universidad Austral de Chile                                                                    | Chile                                                      |
| Cortina-Segarra, Jordi   | Professor                                             | Department of Ecology-IMEM. University of Alicante                                              | Spain                                                      |
| Cosacov, Andrea          | Researcher, Biologist                                 | IMBIV-CONICET                                                                                   | Argentina                                                  |
| Cosi, Filippo            | PhD student in Physics                                | Max Planck Institute for Dynamics and Self-Organization                                         | Germany                                                    |
| Cosovic, Marija          | PhD student                                           | Forest Research Centre (CEF), University of Lisbon                                              | Portugal                                                   |
| Costa, Tânia             | Biologist/Conservation Biology                        | University of Lisbon                                                                            | Portugal                                                   |
| Costa, Valentina         | Post-doc in Marine Ecology                            |                                                                                                 | Portugal                                                   |
| Costa, Hugo              | Land cover mapping from remote sensing                | Direção-Geral do Território                                                                     | Portugal                                                   |
| Costa, Rodrigo           | Professor                                             | Universidade Federal do Recôncavo da Bahia                                                      | Brazil                                                     |
| Costa, Andrea            | Researcher Plasma Astrophysics                        | CONICET                                                                                         | Argentina                                                  |
| Costa, Paulo Manuel      | Professor                                             | Universidade Aberta                                                                             | Portugal                                                   |
| Costa, Ana               | Assistant Professor - Marine Ecology                  | University of the Azores, CIBIO-InBio                                                           | Portugal                                                   |
| Costa, Alexandre         | Professor                                             | State University of Ceará                                                                       | Brazil                                                     |
| Costa Neves, Andre       | Bachelor currently doing his Master in Marine Biology | Ghent University                                                                                | Brazil                                                     |
| Costantino, Andrea Ivan  | PhD candidate, Cognitive Science                      | Macquarie University                                                                            | Australia                                                  |
| Costanza, Jennifer       |                                                       | North Carolina State University                                                                 | United States of America (the)                             |
| Costas, Eduardo          | Professor of Genetics                                 | Veterinary Faculty. Complutense University. Madrid.                                             | Spain                                                      |
| Costes-Thire, Morgane    | Assistant Professor                                   |                                                                                                 | France                                                     |
| Costille, Anne           | Research engineer in astrophysics                     | Laboratoire d astrophysique de marseille                                                        | France                                                     |
| Cote, Julien             | Researcher                                            | CNRS                                                                                            | France                                                     |
| Cotrim da Cunha, Leticia | Assistant Professor - Chemical Oceanography           | Universidade do Estado do Rio de Janeiro                                                        | Brazil                                                     |
| Cotter, Sheena           | Senior Lecturer in Ecology                            | University of Lincoln                                                                           | United Kingdom of Great Britain and Northern Ireland (the) |
| Cotton, Matthew          | Associate Professor of Geography and Environment      | University of York                                                                              | United Kingdom of Great Britain and Northern Ireland (the) |
| couchoud, isabelle       | Senior lecturer in Climatology                        | Université Savoie Mont Blanc                                                                    | France                                                     |
| Coudel, Emilie           | Scientist in agroecology                              | CIRAD                                                                                           | France                                                     |
| COUDEYRE, Fabien         | IE                                                    | CNRS                                                                                            | France                                                     |
| Coudrain, Anne           | Directrice de Recherche honoraire                     | IRD                                                                                             | France                                                     |

|                          |                                                        |                                                                                                   |                                                            |
|--------------------------|--------------------------------------------------------|---------------------------------------------------------------------------------------------------|------------------------------------------------------------|
| Coulm, Martin            | PhD Student in biology                                 | 1994                                                                                              | France                                                     |
| Coulombe, Louis-Philippe | MSc Candidate in Astronomy and Astrophysics            | University of Montreal                                                                            | Canada                                                     |
| Coulombe, Gabrielle      | Research Associate, Wildlife Biology, M.S.             | University of Montana                                                                             | United States of America (the)                             |
| Coulon, Aurélie          | associate professor                                    | Muséum national d'Histoire naturelle                                                              | France                                                     |
| Coulson, Tim             | Professor of Zoology                                   | University of Oxford                                                                              | United Kingdom of Great Britain and Northern Ireland (the) |
| Coulthart, Michael       | Infectious disease surveillance                        | Public Health Agency of Canada                                                                    | Canada                                                     |
| Counil, Emilie           | Researcher in Population health                        | Ined                                                                                              | France                                                     |
| Coupal, Louis            | Biostatistician                                        | Institut de rhumatologie de Montréal                                                              | Canada                                                     |
| Coupry, Damien           | Cheminformatic Scientist and AI                        | GlaxoSmithKline                                                                                   | United Kingdom of Great Britain and Northern Ireland (the) |
| courault, dominique      | directrice de recherche                                | INRA                                                                                              | France                                                     |
| Courcelle, Emmanuel      | Computer scientist (ingenieur)                         | C.N.R.S.                                                                                          | France                                                     |
| Courchamp, Franck        | Director of Research - Ecology, Conservation           | CNRS - University Paris Saclay                                                                    | France                                                     |
| Cournac, Laurent         | Senior Scientist, Ecophysiology                        | IRD                                                                                               | France                                                     |
| COURREGES, Cecile        | Research Engineer                                      | CNRS                                                                                              | France                                                     |
| Courtillat, Margot       | PhD student in Paleoclimatology                        | CEFREM                                                                                            | France                                                     |
| Courtin, Régis           | Astrophysicist                                         | Paris Observatory                                                                                 | France                                                     |
| Courtiol, Alexandre      | Researcher in evolution & ecology                      | Leibniz IZW                                                                                       | Germany                                                    |
| COURTOIS, Elodie         | research ingenior                                      | CNRS                                                                                              | French Guiana                                              |
| Courville, Karen         | Chief Hemodialysis Unit/Nephrologist, Researcher       | Hospital Dr. Gustavo N. Collado, Chitré/ Instituto de Ciencias Médicas Las Tablas                 | Panama                                                     |
| Coutellec, Marie-Agnès   | research scientist / ecotoxicology                     | INRA                                                                                              | France                                                     |
| COUTINHO, MIGUEL         | Environmental Applied Sciences                         | IDAD - Institute of Environment and Development                                                   | Portugal                                                   |
| Couto, Ricardo           | Post-doctoral Fellow                                   | University of Cape Town                                                                           | South Africa                                               |
| Couto Garcia, Letícia    | Professor of Restoration Ecology                       | Universidade Federal de Mato Grosso do Sul                                                        | Brazil                                                     |
| Coutu, Stephane          | Professor of Physics and of Astronomy and Astrophysics | Penn State University                                                                             | United States of America (the)                             |
| Couturier, Lydie         | Postdoc fellow                                         | Université de Bretagne Occidentale                                                                | France                                                     |
| Couvreur, Thomas         | Senior researcher, tropical biodiversity               | Institut de Recherche pour le Développement (IRD)                                                 | France                                                     |
| Couvreur, Valentin       | Post-doctoral researcher in agronomy                   | University of Louvain                                                                             | Belgium                                                    |
| Coux, Olivier            | Senior scientist; Biology                              | CNRS                                                                                              | France                                                     |
| couzin, nimbus           | Professor, PhD Physics                                 | Kankakee Community College                                                                        | United States of America (the)                             |
| Covarrubias, Alejandra   | Professor/Plant Biology                                | Universidad Nacional Autónoma de Mexico                                                           | Mexico                                                     |
| Covas, Rita              | Researcher in Biology                                  |                                                                                                   | Portugal                                                   |
| Cove, Michael            | Smithsonian Fellow - Conservation Biology              | Smithsonian Conservation Biology Institute                                                        | United States of America (the)                             |
| Coviella, Carlos Eduardo | Full Professor of Ecology and Researcher               | Universidad Nacional de Lujan                                                                     | Argentina                                                  |
| Cowie, Robert            | Research Professor                                     | University of Hawaii                                                                              | United States of America (the)                             |
| Cowles, David            | Professor of Biology                                   | Walla Walla University                                                                            | United States of America (the)                             |
| Cowley, Dr Kirsten       | Environmental Scientist                                | Environment, Energy and Science, Department of Planning, Industry and Environment, NSW Government | Australia                                                  |

|                          |                                                                       |                                                                                               |                                                            |
|--------------------------|-----------------------------------------------------------------------|-----------------------------------------------------------------------------------------------|------------------------------------------------------------|
| Cowling, Wallace         | Professor in Plant Breeding                                           | The University of Western Australia                                                           | Australia                                                  |
| Cowlishaw, Guy           | Senior Research Fellow                                                | Institute of Zoology, Zoological Society of London                                            | United Kingdom of Great Britain and Northern Ireland (the) |
| Cowlishaw, Richard       | Professor of Biology                                                  | Southwestern College                                                                          | United States of America (the)                             |
| Cowton, Tom              | Lecturer in Physical Geography                                        | University of St Andrews                                                                      | United Kingdom of Great Britain and Northern Ireland (the) |
| Cox, Evelyn              | Coral Reef Ecologist                                                  | University of Hawaii                                                                          | United States of America (the)                             |
| Cox, Daniel              | Research fellow BioSciences                                           | University of Exeter                                                                          | United Kingdom of Great Britain and Northern Ireland (the) |
| Coye, Camille            | British Academy Postdoctoral research fellow                          | University of Exeter                                                                          | United Kingdom of Great Britain and Northern Ireland (the) |
| Crabit, Armand           | assistant professor                                                   | Montpellier Supagro                                                                           | France                                                     |
| Craig, Nathan            | Archaeology/Anthropology                                              | New Mexico State University                                                                   | United States of America (the)                             |
| Craig, Alison            | Lecturer                                                              | Edinburgh Napier University                                                                   | United Kingdom of Great Britain and Northern Ireland (the) |
| Craig, Michael           | Research Fellow                                                       | University of Western Australia                                                               | Australia                                                  |
| Craig, Peter             | Ecologist                                                             | retired                                                                                       | United States of America (the)                             |
| Craighead, Frank (Lance) | Executive Director                                                    | Craighead Institute                                                                           | United States of America (the)                             |
| Cramer, Michael          | Plant ecophysiology                                                   | University of Cape Town                                                                       | South Africa                                               |
| Cramer, Wolfgang         | Senior scientist, climate, biodiversity, sustainable development      | CNRS / IMBE                                                                                   | France                                                     |
| Crane, Rebecca           | Reader in Psychology                                                  | Bangor University                                                                             | United Kingdom of Great Britain and Northern Ireland (the) |
| Crane, Clare             | Biodiversity Research Officer                                         | Australian National University                                                                | Australia                                                  |
| Crane, Rich              | Lecturer in Sustainable Mining                                        | University of Exeter                                                                          | United Kingdom of Great Britain and Northern Ireland (the) |
| Cranston, James          | PhD Student, Macroecology                                             | University of Exeter                                                                          | United Kingdom of Great Britain and Northern Ireland (the) |
| Crave, Alain             | researcher                                                            | CNRS                                                                                          | France                                                     |
| Crawford, Tim            | Postdoctoral Research Fellow                                          | University of Potsdam                                                                         | Germany                                                    |
| Crawford, Ngel           | Emeritus Professor of Biological Sciences                             | UC San Diego                                                                                  | United States of America (the)                             |
| Crayn, Darren            | Professor and Director, Australian Tropical Herbarium - plant science | James Cook University                                                                         | Australia                                                  |
| CREAC'H, Layla           | PhD student                                                           | Institute for Marine and Antarctic Studies                                                    | Australia                                                  |
| Creary Ford, Marcia      | Environmental Data Manager/Marine Biologist                           | Caribbean Coastal Data Centre, UWI-Centre for Marine Sciences                                 | Jamaica                                                    |
| Creasey, Matthew         | Ecologist                                                             |                                                                                               | United Kingdom of Great Britain and Northern Ireland (the) |
| Cree, Alison             | Professor, Zoology                                                    | University of Otago                                                                           | New Zealand                                                |
| Creed, Irena             | Associate VP Research, Dept. of Biology                               | University of Saskatchewan                                                                    | Canada                                                     |
| Crego, Ramiro            | Postdoctoral Researcher                                               | Smithsonian Conservation Biology Institute                                                    | Argentina                                                  |
| Cremoux, Sylvain         | Associates Professor                                                  | Centre de recherche cerveau et cognition, UMR 5549, CNRS, université Paul Sabatier Toulouse 3 | France                                                     |

|                            |                                                                       |                                                                                                                                     |                                                            |
|----------------------------|-----------------------------------------------------------------------|-------------------------------------------------------------------------------------------------------------------------------------|------------------------------------------------------------|
| Cresciense, Lecaude        | Biostatistician et Bioinformatician in microbiology                   | Ceraq                                                                                                                               | France                                                     |
| crespin, silvio javier     | Post Doctoral researcher                                              | Facultad de Ciencias Forestales, Universidad de Concepcion, Chile                                                                   | Chile                                                      |
| Crespo, Enrique            | Professor of Ecology, University of Patagonia                         | Senior Researcher CONICET                                                                                                           | Argentina                                                  |
| Crespo, Daniel             | Researcher                                                            | MARE-IPLeiria                                                                                                                       | Portugal                                                   |
| Crespo, Julio E.           | Associate Professor in Natural Sciences and Sustainability            | Universidad de Los Lagos, Osorno Campus                                                                                             | Chile                                                      |
| Crespo Neto, Osman         | Master student Marine Biological Resources                            | IMBRSea                                                                                                                             | Brazil                                                     |
| Cresswell, Richard         | Hydrogeologist                                                        |                                                                                                                                     | Australia                                                  |
| Crete, Elena               | Manager                                                               | Sustainable Development Solutions Network (SDSN)                                                                                    | United States of America (the)                             |
| Crevecoeur, Isabelle       | Researcher - paleanthropology                                         | CNRS                                                                                                                                | France                                                     |
| Crevecoeur, Sophie         | Research Scientist                                                    | Environment and Climate Change Canada                                                                                               | Canada                                                     |
| Cribb, Thomas              | Associate Professor Parasitology                                      | The University of Queensland                                                                                                        | Australia                                                  |
| Criscuolo, Francois        | Director of Research in evolutionary biology, CNRS                    | IPH, Department of Ecology, Physiology, Ethology                                                                                    | France                                                     |
| Crist, Eileen              | Science & Technology Studies / Environmental Studies                  | Virginia Tech                                                                                                                       | United States of America (the)                             |
| Cristi, Antonia            | Microbial Ecology                                                     | GEMA Center for Genomics, Ecology and Environment Universidad Mayor                                                                 | Chile                                                      |
| Crnobrnja-Isailovic, Jelka | Professor of Evolutionary and Conservation Biology                    | Faculty of Sciences and Mathematics University of Nis & Institute for Biological Research "Sinisa Stankovic" University of Belgrade | Serbia                                                     |
| Croijmans, Luuk            | PhD candidate in Ecological Agriculture and Insect-Plant Interactions | Wageningen University                                                                                                               | Netherlands (the)                                          |
| Croizier, Sophie           |                                                                       | University of Lausanne                                                                                                              | Switzerland                                                |
| Croll, Stuart              | Professor (emeritus), Coatings and Polymeric Materials                | North Dakota State University                                                                                                       | United States of America (the)                             |
| Crompton, Jeff             | PhD Candidate in Glaciology                                           | Simon Fraser University                                                                                                             | Canada                                                     |
| Cronemberger, Cecilia      | Phd student - Environmental Science                                   | Universidade do Estado do Rio de Janeiro                                                                                            | Brazil                                                     |
| Crook, Julia               | Research Fellow in Atmospheric Science                                | University Of Leeds                                                                                                                 | United Kingdom of Great Britain and Northern Ireland (the) |
| Crookall, David            | prof & ed, climate change & participatory simulation                  | UCA                                                                                                                                 | France                                                     |
| Cross, Ian                 | Professor                                                             | University of Cambridge                                                                                                             | United Kingdom of Great Britain and Northern Ireland (the) |
| Cross, Regan               | PhD Student, Biology                                                  | Queen's University                                                                                                                  | Canada                                                     |
| Cross, Adam                | Research Fellow/Ecology                                               | Curtin University                                                                                                                   | Australia                                                  |
| Cross, Sophie              | Researcher, restoration ecology                                       | Curtin University                                                                                                                   | Australia                                                  |
| Crossan, A. Brook          | Ph.D. Geophysical Fluid Dynamics                                      | New Jersey Institute of Technology                                                                                                  | United States of America (the)                             |
| Crossley, Dac              | soil vecology                                                         | Georgia Museum of Natural History                                                                                                   | United States of America (the)                             |
| Crother, Brian             | Professor of Biology                                                  | 1956                                                                                                                                | United States of America (the)                             |
| Crottini, Angelica         | Researcher                                                            | Cibio, Universidade do Porto                                                                                                        | Portugal                                                   |
| Crouthamel, D.Sc., Richard | Executive Director                                                    | International Environmental Data Rescue Organization                                                                                | United States of America (the)                             |
| Crouzat, Emilie            | Researcher - Mountain social-ecological systems                       | Irstea                                                                                                                              | France                                                     |

|                                |                                                                        |                                                                                                                   |                                                            |
|--------------------------------|------------------------------------------------------------------------|-------------------------------------------------------------------------------------------------------------------|------------------------------------------------------------|
| Crowley, Liam                  | Post-graduate researcher                                               | University of Birmingham                                                                                          | United Kingdom of Great Britain and Northern Ireland (the) |
| Crowley, Dr Dominic            | Material Sciences                                                      | University of Brighton                                                                                            | United Kingdom of Great Britain and Northern Ireland (the) |
| Crozat, Estelle                | Lecturer in Genetics                                                   | Université Paul Sabatier, Toulouse                                                                                | France                                                     |
| Cruickshank, Sam               | Postdoctoral researcher in Ecology                                     | Swiss Federal Research Institute WSL                                                                              | Switzerland                                                |
| Crumley, Carole                | Professor emerita, Anthropology                                        | University of North Carolina, Chapel Hill                                                                         | United States of America (the)                             |
| Crusellas, M Àngels            | Physics teacher                                                        | Universitat de Vic - Universitat Central de Catalunya                                                             | Spain                                                      |
| Crusius, Christina             | Atmospheric Scientist                                                  |                                                                                                                   | United States of America (the)                             |
| Crusius, John                  | Chemical oceanographer                                                 | Federal scientist signing as an individual                                                                        | United States of America (the)                             |
| Cruywagen, Elsie               | Plant pathologist                                                      | Agricultural Research Council                                                                                     | South Africa                                               |
| Cruz, Sebastian                | PhD. Ecology                                                           |                                                                                                                   | Ecuador                                                    |
| Cruz, Monica                   | Researcher, Psychologist, Specialist in Public Policy & Gender Justice | -                                                                                                                 | Costa Rica                                                 |
| Cruz, Rafael                   | Professor Asociado                                                     | Federal University of Pampa                                                                                       | Brazil                                                     |
| Cruz de Carvalho, Maria Helena | Associate Professor                                                    | UPEC/IBENS                                                                                                        | France                                                     |
| Cruz-Barraza, Jose Antonio     | Titular Researcher                                                     | Universidad Nacional Autonoma de Mexico, Instituto de Ciencias del Mar y Limnologia, Unidad Academica de Mazatlan | Mexico                                                     |
| Cruz-Neto, Oswaldo             | Post doc                                                               | Univerdisade Federal de Pernambuco                                                                                | Brazil                                                     |
| Cryan, Jason                   | Deputy Director and Chief, Research & Collections                      | North Carolina Museum of Natural Sciences                                                                         | United States of America (the)                             |
| Csbasés, M.Àngels              | Professor or Applied Economics                                         | Universitat of Lleida                                                                                             | Spain                                                      |
| Cseh, András                   | Molecular geneticist                                                   |                                                                                                                   | Hungary                                                    |
| Csergo, Anna Maria             | Associate Professor                                                    | Szent Istvan University                                                                                           | Hungary                                                    |
| Csernetics, Arpad              | postdoctoral researcher, Biology                                       | Biological Research Centre, Szeged                                                                                | Hungary                                                    |
| Csilléry, Katalin              | Research Fellow                                                        | Department of Evolutionary Biology and Environmental Studies, University of Zurich                                | Switzerland                                                |
| Csuzdi, Csaba                  | Professor of Zoology                                                   | Eszterházy Károly University                                                                                      | Hungary                                                    |
| cubaynes, sarah                | lecturer                                                               | école pratique des hautes etudes                                                                                  | France                                                     |
| Cubaynes, Sarah                | associate professor                                                    | Ecole Pratique des Hautes Etudes                                                                                  | France                                                     |
| Cucchi, Michel                 | Medicine                                                               | Centre Virchow-Villermé, Paris                                                                                    | France                                                     |
| Cucchiario, Sara               | PostDoc in Geomorphology                                               | University of Padova                                                                                              | Italy                                                      |
| Cucknell, Anna                 | Estuaries and Wetlands Project Manager                                 | Zoological Society of London                                                                                      | United Kingdom of Great Britain and Northern Ireland (the) |
| Cudennec, Christophe           | Professor                                                              | Agrocampus Ouest, UMR SAS                                                                                         | France                                                     |
| Cudlin, Pavel                  | Head of Department, ecologist                                          | Global Change Research Institute, Czech Academy of Sciences                                                       | Czech Republic (the)                                       |
| Cudmore, Wynn                  | Life Science Instructor                                                | Chemeketa Community College                                                                                       | United States of America (the)                             |
| Cuellar, Sabrina               | Student Researcher                                                     | University of Auckland/Plant and Food research/Eurofins                                                           | New Zealand                                                |
| Cuervo, José Javier            | Senior Scientist in Evolutionary Ecology                               | National Museum of Natural Sciences (MNCN-CSIC)                                                                   | Spain                                                      |
| Cuesta, Miriam                 | Master student                                                         | IMAR                                                                                                              | Portugal                                                   |

|                           |                                                                 |                                                                              |                                                            |
|---------------------------|-----------------------------------------------------------------|------------------------------------------------------------------------------|------------------------------------------------------------|
| Cuevas, Elfego            | PhD candidate in Conservation Medicine                          | University Andres Bello                                                      | Chile                                                      |
| Cuevas Juárez, Esmeralda  | PhD student                                                     | Instituto de Biotecnología UNAM                                              | Mexico                                                     |
| Cui, Zhiqiang             | Research Scientist                                              | University of Leeds                                                          | United Kingdom of Great Britain and Northern Ireland (the) |
| Cullen, Ross              | Emeritus Professor of Resource Economics                        | Lincoln University                                                           | New Zealand                                                |
| Cumming, Brian            | Professor and Head                                              | Queen's University, Dept. Biology                                            | Canada                                                     |
| Cummings, William         | Ecologist                                                       | Center for Regional Alternatives                                             | United States of America (the)                             |
| Cundliffe, Viva           | PhD abd                                                         | GC Green Carbon Inc                                                          | Canada                                                     |
| Cunha, Catarina           | Biologist/Veterinary Doctor                                     |                                                                              | Portugal                                                   |
| Cunha, Eduardo            | Postdoctoral Research Associate / Wildlife and Fisheries        | Texas A&M University                                                         | United States of America (the)                             |
| Cunill, Laia              | Engineer                                                        | Ciclica                                                                      | Spain                                                      |
| Cunillera-Montcusí, David | PhD Student                                                     | Universitat de Girona                                                        | Spain                                                      |
| Cunningham, Duncan        | Retired science officer                                         | Department of Conservation                                                   | New Zealand                                                |
| Cunningham, Andrew        | Professor of Wildlife Epidemiology & Deputy Director of Science | Zoological Society of London                                                 | United Kingdom of Great Britain and Northern Ireland (the) |
| Cunningham, Mary Ann      | Professor of Geography                                          | Vassar College                                                               | United States of America (the)                             |
| Cunningham, Calum         |                                                                 | University of Tasmania                                                       | Australia                                                  |
| Cuny, Philippe            | Professor - Microbial marine ecology                            | Aix-Marseille University - Mediterranean Institute of Oceanography           | France                                                     |
| Cupillard, Christophe     | Archaeologist                                                   | Ministère de la Culture                                                      | France                                                     |
| Cupul, Fabio              |                                                                 | Universidad de Guadalajara                                                   | Mexico                                                     |
| Curaqueo, Gustavo         | Assistan Professor                                              | Universidad Católica de Temuco                                               | Chile                                                      |
| Cure, Marcio              | PhD student/ecology                                             | Universidade Federal de Santa Catarina                                       | Brazil                                                     |
| Curien, Dominique         | Senior scientist in Nuclear Physics                             | IN2P3/CNRS                                                                   | France                                                     |
| Curin, Sandra             | PhD Student                                                     | csiro                                                                        | Australia                                                  |
| Curnier, Daniel           | Environmental Science                                           | Institute of Geography and Sustainability, University of Lausanne            | Switzerland                                                |
| Currey, Mark              | Senior Research Assistant 1                                     | University of Oregon                                                         | United States of America (the)                             |
| Currie, Jock              | Postdoctoral Fellow                                             | Nelson Mandela University                                                    | South Africa                                               |
| Currier, Kitty            | Geographer                                                      |                                                                              | United States of America (the)                             |
| Curry, Chris              | emeritus consultant                                             | Fiona Stanley Hospital. Murdoch University                                   | Australia                                                  |
| Cursach, Jaime            | Marine biology                                                  | Fundación Conservación Marina                                                | Chile                                                      |
| Curtis, Barbara           | Environmental consultant / ecologist                            | Curtis Consulting - private                                                  | Namibia                                                    |
| Curtiss, Owen             | Electrical Engineer                                             | TKDA                                                                         | United States of America (the)                             |
| Cury, Jean                | Post Doc                                                        | LRI - Univ. Paris Saclay                                                     | France                                                     |
| Cussac, Daniel            | Professor of Human Physiology                                   | Faculty of Pharmaceutical Sciences & INSERM I2MC U1048 laboratory , Toulouse | France                                                     |
| Custer, Brian             | Developer                                                       | AuroraView LLC                                                               | United States of America (the)                             |
| Custódio, Marco           | PhD candidate                                                   | University of Aveiro                                                         | Portugal                                                   |
| Cutajar, Simone           | Director                                                        | Green House                                                                  | Malta                                                      |

|                                  |                                                                     |                                                                        |                                                            |
|----------------------------------|---------------------------------------------------------------------|------------------------------------------------------------------------|------------------------------------------------------------|
| Cutajar, Anthony                 | PhD Student                                                         | Aston University                                                       | United Kingdom of Great Britain and Northern Ireland (the) |
| Cvijetic, Slaven                 | MSc Neuroscience                                                    | ETHZ                                                                   | Switzerland                                                |
| Cyle, Taylor                     | Soil Biogeochemist - PhD Candidate                                  | Cornell University                                                     | United States of America (the)                             |
| Czachorowski, Stanisław          | associate professor, biology                                        | University of Warmia and Mazury in Olsztyn                             | Poland                                                     |
| Czajkowski, Jorge Daniel         | Director                                                            | LAYHS - FAU - UNLP // CIC // CONICET                                   | Argentina                                                  |
| Czarnecki, Marcin                | associate professor                                                 | Jagiellonian University                                                | Poland                                                     |
| CZERWIEC, Quentin                | PhD Student /Biotechnology                                          | INRA                                                                   | France                                                     |
| Czirják, Gábor Árpád             | Scientist                                                           | Leibniz Institute for Zoo and Wildlife Research                        | Germany                                                    |
| Czisch, Michael                  | Head of Neuroimaging                                                | Max Planck Institute of Psychiatry                                     | Germany                                                    |
| Czucz, Bálint                    |                                                                     | European Commission, Joint Research Centre                             | Italy                                                      |
| Czyż, Beata                      | ecologist, ornithologist                                            | University of Wrocław                                                  | Poland                                                     |
| D. Ritter, Camila                | Biologist                                                           | University of Duisburg-Essen                                           | Germany                                                    |
| D'Agata, Federico                | Applied Physics                                                     | University of Turin                                                    | Italy                                                      |
| D'Alba, Liliana                  | Evolutionary Biologist                                              | Universiteit Gent                                                      | Belgium                                                    |
| D'Alelio, Domenico               | Researcher, Marine Ecology                                          | Stazione Zoologica Anton Dohrn Napoli                                  | Italy                                                      |
| D'Amelio, Pietro Bruno           | Post Doc in Ornithology                                             | FitzPatrick Institute of African Ornithology                           | South Africa                                               |
| D'Amico, Frank                   | Senior Lecturer                                                     | UPPA                                                                   | France                                                     |
| D'Amico, Marcello                | Postdoctoral researcher                                             | CIBIO-InBIO (University of Porto) & CEABN-InBIO (University of Lisbon) | Portugal                                                   |
| D'Août, Kristiaan                | Biologist - Senior Lecturer in Biomechanics                         | University of Liverpool                                                | United Kingdom of Great Britain and Northern Ireland (the) |
| D'Bastiani, Elvira               | PhD Student in Ecology and Conservation                             | Universidade Federal do Paraná                                         | Brazil                                                     |
| D'Elia, Guillermo                | Profesor                                                            | Universidad Austral de Chile                                           | Chile                                                      |
| da Costa Araujo, Juliana         | PhD                                                                 | Max Planck Institute of Animal Behavior                                | Germany                                                    |
| da Cruz, Aparecido               | Professor em Proteção Humana                                        | Sociedade Brasileira de Proteção Humana SOBRAPH                        | Brazil                                                     |
| Da Cunha, Dênis Antônio          | Associate Professor                                                 | Universidade Federal de Viçosa                                         | Brazil                                                     |
| Da Lage, Jean-Luc                | Researcher in Evolutionary biology                                  | CNRS                                                                   | France                                                     |
| Da Mosto, Jane                   | Executive Director                                                  | We are here Venice                                                     | Italy                                                      |
| da Silva, Dakir Larara           | Professor/Geógrafo e Climatologista                                 | UFRGS - Universidade Federal do Rio Grande do Sul                      | Brazil                                                     |
| da Silva, Emilin Joma            | PHD Student                                                         | University Hamburg                                                     | Germany                                                    |
| da Silva, Eduardo                | Head professor                                                      | Federal University of Bahia                                            | Brazil                                                     |
| da Silva, Istéfani Luciene Dayse | Adjunct Professor                                                   | Federal University of West of Bahia                                    | Brazil                                                     |
| da Silva Lima, Ligia             | PhD researcher                                                      | Ghent University                                                       | Belgium                                                    |
| Dacey, Christopher               | Senior Environmental Scientist                                      | Hydroture                                                              | United States of America (the)                             |
| Daco, Laura                      | Researcher                                                          | National museum of natural history Luxembourg                          | Luxembourg                                                 |
| Dacre, Ian                       | Regional Animal Health Emergency Officer / veterinary medicine      | Food and Agriculture Organisation of the United Nations                | Thailand                                                   |
| Daffner, Michaela                | Dr.med.                                                             | General Practitioner                                                   | Germany                                                    |
| Dafis, Stavros                   | Physicist - Atmospheric Sciences and Environment M.Sc., PhD student | National Observatory of Athens                                         | Greece                                                     |
| Dagosta, Fernando C. P.          | Associate Professor                                                 | Universidade Federal da Grande Dourados                                | Brazil                                                     |

|                                  |                                                                              |                                                                                    |                                |
|----------------------------------|------------------------------------------------------------------------------|------------------------------------------------------------------------------------|--------------------------------|
| Dagreou, Sylvie                  | Assistant professor, Physics                                                 | Université de Pau et des Pays de l'Adour                                           | France                         |
| Dahal, Karna                     | Post Doctoral Researcher                                                     | Chalmers University of Technology                                                  | Sweden                         |
| Dahl, Arthur                     | President, Biologist                                                         | International Environment Forum                                                    | Switzerland                    |
| Dahlgren, Thomas                 | Scientist (PhD Marine Biology)                                               | NORCE Norwegian Research Centre                                                    | Norway                         |
| Dahm, Daniel                     | Executive Director, Senior Advisor, Member                                   | United Sustainability, World Future Council, Federation of German Scientists       | Germany                        |
| Dai, Boyi                        | Associate Professor                                                          | University of Wyoming                                                              | United States of America (the) |
| Dai, Wen                         | Geography                                                                    | University of Lausanne                                                             | Switzerland                    |
| Dailly, Helene                   | Scientific staff                                                             | UCLouvain                                                                          | Belgium                        |
| Dainese, Matteo                  | Senior Researcher                                                            | Eurac Research                                                                     | Italy                          |
| Dal Co, Alma                     | physicist                                                                    | ETH ZURICH                                                                         | Switzerland                    |
| Dala-Corte, Renato               | Postdoctoral researcher / Freshwater ecology                                 | Universidade Federal de Goiás                                                      | Brazil                         |
| Dalago Salgado, Lilian           | PhD - Ecology and Conservation                                               |                                                                                    | Brazil                         |
| Dalbelo, Thalita                 | Coordinaytor of Unicamp Masterplan                                           | Unicamp                                                                            | Brazil                         |
| Daley, Cynthia                   | Director for the Center for Regenerative Agriculture & Resilient Systems     | California State University Chico                                                  | United States of America (the) |
| Dalfo, Cristina                  | Professor                                                                    | Universitat de Lleida                                                              | Spain                          |
| Dallapiccola, Mattia             | Researcher                                                                   | Eurac Research                                                                     | Italy                          |
| Dalle Fratte, Michele            | post-doc                                                                     | Università of Insubria                                                             | Italy                          |
| Dallmeier, Francisco             | Director Center for Conservation and Sustainability                          | Smithsonian Conservation Biology Institute                                         | United States of America (the) |
| Dalrymple, G Brent               | Professor & Dean Emeritus, College of Earth, Oceanic, & Atmospheric Sciences | Oregon State University                                                            | United States of America (the) |
| Daly, Martin                     | Lecturer in Psychology                                                       | Western Sydney University                                                          | Australia                      |
| Daly, Timothy                    | Computer Science                                                             | Carnegie Mellon University                                                         | United States of America (the) |
| Dalziell, Emma                   | Postdoc/Plant Conservation                                                   |                                                                                    | Australia                      |
| Dami, Laura                      | Project leader                                                               | Tour du Valat                                                                      | France                         |
| Damiani, Giada                   | Specialist in Biophysical Head Modelling - tCS                               | Neuroelectrics                                                                     | Spain                          |
| Damour, Gaëlle                   | Researcher in Agroecolgy                                                     | CIRAD                                                                              | France                         |
| Damus, Martin                    | Plant health risk assessor                                                   | Canadian Food Inspection Agency                                                    | Canada                         |
| DANEL, christine                 | Physician                                                                    | Hopital Bichat Paris                                                               | France                         |
| Danese, Alberto                  | PhD in Electrical Engineering                                                | UPC - Universitat Politecnica de Catalunya                                         | Spain                          |
| D'Angelo, Giulia                 | PhD student in animal biology, natural history of urban birds                | State University of Campinas                                                       | Brazil                         |
| Daniel, Francois-Joseph          | Sociology                                                                    | National School for Water and Environmental Engineering - University of Strasbourg | France                         |
| Daniel, Gabriela                 | Biology                                                                      | Unesp                                                                              | Brazil                         |
| DANIEL, Warren                   | PhD Student                                                                  | antwerpen Universiteit                                                             | Belgium                        |
| Danielle, ALLOIN                 | Astrophysics, Directrice de Recherches émérite au CNRS                       | CNRS                                                                               | France                         |
| Danielsen, Johannis              | Head of the Seabird Ecology Deparment                                        | Faroese Marine Research Institute                                                  | Faroe Islands (the)            |
| Danielsson Villegas, Luis Miguel | Research Student                                                             | IMDEA Software Institute                                                           | Spain                          |

|                      |                                                                                         |                                                                       |                                                            |
|----------------------|-----------------------------------------------------------------------------------------|-----------------------------------------------------------------------|------------------------------------------------------------|
| Danilo, Laure        | Paleontologist, museum curator                                                          | Muséum d'Orléans pour la Biodiversité et l'Environnement              | France                                                     |
| Danion, Frederic     | Researcher in Neurosciences                                                             | CNRS                                                                  | France                                                     |
| Danjon, Frédéric     | Senior scientist                                                                        | INRA                                                                  | France                                                     |
| Danks, Cecilia       | Associate Professor                                                                     | University of Vermont                                                 | United States of America (the)                             |
| Danovaro, Roberto    | Prof.                                                                                   | Stazione Zoologica Anton Dohrn                                        | Italy                                                      |
| Danowski, Barbara    | Professor of Biological Sciences                                                        | Union College                                                         | United States of America (the)                             |
| Danquigny, Charles   | Associate Professor                                                                     | Avignon Université                                                    | France                                                     |
| Dansereau, Véronique | Post. Doc. researcher in glaciology and geophysics                                      | Laboratoire 3SR (CNRS)                                                | France                                                     |
| Dantas, Sidnei       | bIOLOGY                                                                                 | Cristalino Lodge                                                      | Brazil                                                     |
| Danthu, Pascal       | Plant ecologist                                                                         | CIRAD                                                                 | France                                                     |
| Dao, Thai            | Plant Biology                                                                           | University of California, Berkeley                                    | Viet Nam                                                   |
| Daouk, Silwan        | PhD in Environmental Geochemistry                                                       | Eawag                                                                 | Switzerland                                                |
| Dapkey, Tanya        | Entomologist                                                                            | Academy of Natural Sciences                                           | United States of America (the)                             |
| Darbi, Marianne      | Biodiversity Researcher                                                                 | Helmholtz Centre for Environmental Research - UFZ                     | Germany                                                    |
| Darboux, Frédéric    | Environment scientist                                                                   | INRA                                                                  | France                                                     |
| Darcy, Laura         | Conservationist                                                                         | Zoological Society of London/Borneo Nature Foundation                 | United Kingdom of Great Britain and Northern Ireland (the) |
| Darimont, Chris      | Associate Professor                                                                     | University of Victoria                                                | Canada                                                     |
| Darr, Pratima        | Assistant Professor of Biology (I also teach environmental science)                     | Georgia Gwinnett College                                              | United States of America (the)                             |
| Darszon, Alberto     | Professor                                                                               | Universidad Nacional Autónoma de México                               | Mexico                                                     |
| Das, Sudip           | Scientist in Microbiology                                                               | University of Lausanne                                                | Switzerland                                                |
| Das, Gaurav          | Scientist, Neurobiology                                                                 | National Centre for Cell Science                                      | India                                                      |
| Das, Dhritiman       | Field Scientist                                                                         | Pygmy Hog Conservation Programme, Durrell Wildlife Conservation Trust | India                                                      |
| das Neves, Susana    | Technical assistant - Entomology                                                        | Stellenbosch University                                               | South Africa                                               |
| Datovo, Alessio      | Assistant Professor, Curator of Fishes                                                  | Museu de Zoologia, Universidade de Sao Paulo                          | Brazil                                                     |
| Datta, Debajit       | Assistant Professor of Geography                                                        | Jadavpur University                                                   | India                                                      |
| Daudin, Kevin        | Earth and social sciences                                                               | University of Montpellier                                             | France                                                     |
| Dautermann, Oliver   | Postdoctoral Fellow                                                                     | University of California, Berkeley                                    | United States of America (the)                             |
| Dauvin, Marjorie     | Life sciences teaching assistant                                                        | Miss                                                                  | Belgium                                                    |
| Daveri, Andrea       | PhD                                                                                     | Université de Lausanne                                                | Switzerland                                                |
| Davi, Natalie        | PhD Student                                                                             | Lancaster University                                                  | United Kingdom of Great Britain and Northern Ireland (the) |
| David, Christin      | Junior Research Group Leader - Theoretical Physics                                      | Friedrich-Schiller-Universität Jena                                   | Germany                                                    |
| David, Jacques       | Professor in plant genetics and breeding                                                | Montpellier SupAgro                                                   | France                                                     |
| David, Rinaldi       | Material science                                                                        | LafargeHolcim                                                         | France                                                     |
| DAVID, Romain        | PhD in Marine Ecology, Researcher in large observatory/experimental information systems | Institut national de la recherche agronomique INRA / MISTEA           | France                                                     |
| DAVID, Fernand       | Assistant Professor: Palaeoecology                                                      | CEREGE. Aix-Marseille University                                      | France                                                     |

|                      |                                                                            |                                                                                   |                                                            |
|----------------------|----------------------------------------------------------------------------|-----------------------------------------------------------------------------------|------------------------------------------------------------|
| David-Barrett, Tamas | prof of human evolution and behaviour                                      | Universidad del Desarrollo and University of Oxford                               | United Kingdom of Great Britain and Northern Ireland (the) |
| Davidova, Dr Marie   | Lecturer, Architect                                                        | Welsh School of Architecture, Cardiff University                                  | United Kingdom of Great Britain and Northern Ireland (the) |
| Davidson, Nicholas   |                                                                            | Nick Davidson Environmental                                                       | United Kingdom of Great Britain and Northern Ireland (the) |
| Davidson, Trent      | Graduate Student, Sociology                                                | University of Colorado Boulder                                                    | United States of America (the)                             |
| Davies, Jonathan     | Postdoctoral Research Scientist                                            | Stockholm University                                                              | Sweden                                                     |
| Davies, Tony         | Professor of Physiology (retired)                                          | Zambia School of Medicine                                                         | Zambia                                                     |
| Davies, Gillian      | Senior Ecological Scientist and Visiting Scholar                           | BSC Group, Inc. and Tufts University Global Development and Environment Institute | United States of America (the)                             |
| Davies, Hugh         | Post-doctoral research fellow                                              | Charles Darwin University                                                         | Australia                                                  |
| Davies, Rhiannon     | Assistant Director Academics, Summer                                       | Appleby College                                                                   | Canada                                                     |
| Davies, Mark         | Professor of Bioscience                                                    | University of Sunderland                                                          | United Kingdom of Great Britain and Northern Ireland (the) |
| Davies, Sarah        | Conservation biologist and research manager                                | DST-NRF Centre of Excellence for Invasion Biology                                 | South Africa                                               |
| Davies, Phil         | Agronomy and crop breeding                                                 | South Australian Research and Development Institute                               | Australia                                                  |
| Davies, Kelvin       | University Dean, Prof. of Biochemistry, Mol. Biol., Gerontology & Medicine | University of Southern California                                                 | United States of America (the)                             |
| Davis, William       | Physician                                                                  | Private practice                                                                  | United States of America (the)                             |
| Davis, James         | Geochemist                                                                 | Lawrence Berkeley National Laboratory                                             | United States of America (the)                             |
| Davis, J T           | Geologist                                                                  | Retired                                                                           | United States of America (the)                             |
| Davis, Sam           | Conservation Scientist                                                     | Dogwood Alliance                                                                  | United States of America (the)                             |
| Davis, Stephen       | Distinguished Professor of Biology                                         | Pepperdine University                                                             | United States of America (the)                             |
| Davis, Jenny         | Director, Research Institute for Environment & Livelihoods                 | Charles Darwin University                                                         | Australia                                                  |
| Davis, Drew          | Associate Research Scientist                                               | University of Texas Rio Grande Valley                                             | United States of America (the)                             |
| Davis, Anna          | Physiology                                                                 | Bastyr University                                                                 | United States of America (the)                             |
| Davis, Amy           | Postdoctoral Scientist, Ecology                                            | Ghent University                                                                  | Belgium                                                    |
| Davis, Kate          | Computational Chemistry PhD Student                                        | University of Florida                                                             | United States of America (the)                             |
| Davis, Naomi         | Environmental Scientist                                                    | Parks Victoria                                                                    | Australia                                                  |
| Davis, Adrian        | Ecologist PhD and Medical Doctor                                           | University of Sydney                                                              | Australia                                                  |
| Davison, Ross        | Remote Sensing Graduate Student                                            | University of California, Santa Cruz                                              | United States of America (the)                             |
| Davison, John        | Research fellow, Ecology                                                   | University of Tartu                                                               | Estonia                                                    |
| Davitt, Lina         | Dr Psychology                                                              | Bangor University                                                                 | United Kingdom of Great Britain and Northern Ireland (the) |
| Davoren, Elandrie    | Post-doctoral researcher, Environmental Science                            | Rhodes University                                                                 | South Africa                                               |
| Davoult, Dominique   | Professor                                                                  | Sorbonne Université                                                               | France                                                     |
| Davydov, Iakov       | Postdoc, computational biology                                             | F. Hoffmann La Roche Ltd                                                          | Switzerland                                                |
| Dawson, Wayne        | Ecologist                                                                  | Durham University                                                                 | United Kingdom of Great Britain and Northern Ireland (the) |
| Dawson, Paul         | PhD, Mechanical Engineering, Professor                                     | Boise State University                                                            | United States of America (the)                             |

|                            |                                                                     |                                                                        |                                                            |
|----------------------------|---------------------------------------------------------------------|------------------------------------------------------------------------|------------------------------------------------------------|
| DAWSON, PAUL               | PhD, Mechanical Engineering, Professor                              | Boise State University                                                 | United States of America (the)                             |
| Dawson Shepherd, Alexander | Independent Environmental Consultant                                |                                                                        | United Kingdom of Great Britain and Northern Ireland (the) |
| Day, Jo                    | Conservation Geneticist                                             | Taronga Conservation Society Australia                                 | Australia                                                  |
| Day, Belinda               | Conservation Biologist and Freshwater Biologist                     | University of Cape Town                                                | South Africa                                               |
| Day, Jenny                 | Extraordinary Professor                                             | University of the Western Cape                                         | South Africa                                               |
| Day, Roger                 | Prog Executive, Action on Invasives                                 | CABI                                                                   | United Kingdom of Great Britain and Northern Ireland (the) |
| Dayan, Tamar               | Professor of Zoology                                                | Tel Aviv University                                                    | Israel                                                     |
| Dayrit, Fabian             | Professor of Chemistry                                              | Ateneo de Manila University                                            | Philippines (the)                                          |
| Ddumba, Saul Daniel        | Lecturer/Climate Science, Geography, Environmental Science & Policy | Makerere University                                                    | Uganda                                                     |
| De Angelo, Carlos          | Researcher                                                          | Instituto de Ciencias de la Tierra, Biodiversidad y Ambiente (ICBIA)   | Argentina                                                  |
| DE ARAUJO, EDILSON Divino  | Professor                                                           | Federal University of Sergipe                                          | Brazil                                                     |
| De Baets, Bernard          | Senior Full Professor                                               | Ghent University                                                       | Belgium                                                    |
| de Bettignies, Florian     | Doctor Marine Ecology, Coastal Ecosystems                           | Sorbonne University                                                    | France                                                     |
| De Block, Petra            | research scientist                                                  | Meise Botanic Garden                                                   | Belgium                                                    |
| De Boeck, Hans             | senior scientist, global change ecology                             | University of Antwerp                                                  | Belgium                                                    |
| de Boer, Bertram F.        | PhD candidate                                                       | Institute of Environmental Sciences, Leiden University                 | Netherlands (the)                                          |
| de Boer, Wietse            | Senior Scientist & Professor Soil Microbial Ecology                 | NIOO-KNAW & Wageningen UNiversity                                      | Netherlands (the)                                          |
| de Bruin, Sytze            | Associate professor                                                 | Wageningen University                                                  | Netherlands (the)                                          |
| de Bruin, Tessa            | PhD candidate in ecology                                            | UCLouvain                                                              | Belgium                                                    |
| de Bruyn, P.J.Nico         | Associate Professor / Large Mammal Ecology                          | University of Pretoria                                                 | South Africa                                               |
| De Bruyn, Luc              | Nature Conservation, Evolutionary Ecology                           | Research Institute for Nature and Forest (INBO), University of Antwerp | Belgium                                                    |
| de Busserolles, Fanny      | Researcher marine biology and neuroecology                          | The University of Queensland                                           | Australia                                                  |
| de Carne, Sophie           | Postdoctoral researcher in Immuno-oncology                          | The Francis Crick Institute                                            | United Kingdom of Great Britain and Northern Ireland (the) |
| de Carvalho, Jorge         | Associate Professor                                                 | Faculdade de Ciências da Universidade do Porto                         | Portugal                                                   |
| De Carvalho, Ignes         | PhD                                                                 | Université de Lausanne                                                 | Switzerland                                                |
| De Carvalho, Ana Carolina  | PhD Student - Immunology and Virology                               |                                                                        | Brazil                                                     |
| De Carvalho, Rafael        | PhD Student                                                         | Centre for Functional Ecology –University of Coimbra                   | Portugal                                                   |
| de Castro, Francisco       | Senior Scientific Officer / Theoretical Ecology                     | AFBI                                                                   | United Kingdom of Great Britain and Northern Ireland (the) |
| de Chiara, Cesira          | Structural Biology                                                  | The Francis Crick Institute                                            | United Kingdom of Great Britain and Northern Ireland (the) |
| de Clercq, Emeric          | Physicist                                                           | Observatoire de Paris                                                  | France                                                     |
| De Cubber, Lola            | PhD marine biology                                                  | UMR 8187 LOG, U. Lille, ULCO, CNRS, France                             | France                                                     |
| de Daruvar, Antoine        | Professor bioinformatics                                            | Université de Bordeaux                                                 | France                                                     |
| de Dato, Giovanbattista    | Researcher                                                          | CREA Research Centre for Forestry and Wood                             | Italy                                                      |
| DE DOMENICO, Emilio        | Retired Full Professor of Biological Oceanography                   | University of Messina (Sicily)                                         | Italy                                                      |

|                             |                                                        |                                                                                                                                     |                                |
|-----------------------------|--------------------------------------------------------|-------------------------------------------------------------------------------------------------------------------------------------|--------------------------------|
| de França Souza, Renan      | Professor of Ecology and Evolution                     | Universidade Salgado de Oliveira                                                                                                    | Brazil                         |
| de Freitas, Carlos Henrique | Professor - General Ecology                            | Centro Universitário do Planalto de Araxá - UNIARAXÁ - Minas Gerais State                                                           | Brazil                         |
| de Freitas Junior, Gerson   | Professor/Environmental Education                      | Technological College of São Paulo State - FATEC                                                                                    | Brazil                         |
| de Frutos, Angel            |                                                        | Helmholtz Centre for Environmental Research – UFZ and German Centre for Integrative Biodiversity Research (iDiv) Halle-Jena-Leipzig | Germany                        |
| de Gasper, André Luís       | Professor of botany mas biogeography                   | Universidade Regional de Blumenau                                                                                                   | Brazil                         |
| De Gasperin, Ornela         | Postdoctoral researcher                                | University of Lausanne, Switzerland                                                                                                 | Switzerland                    |
| de Goede, Eefje             | PhD Candidate, environmental biology                   | CML, Leiden University                                                                                                              | Netherlands (the)              |
| de Gortari, Rebeca          | Researcher                                             | Instituto de Investigaciones Sociales UNAM                                                                                          | Mexico                         |
| de Grazia, Ugo              | Biologist, PhD                                         | Fondazione IRCCS Istituto Neurologico Carlo Besta                                                                                   | Italy                          |
| De Groeve, Ben              | PhD student / Communication science                    | Ghent University                                                                                                                    | Belgium                        |
| de Groot-Hedlin, Catherine  | researcher, geophysics                                 | Scripps Institution of Oceanography, University of California, San Diego                                                            | United States of America (the) |
| de Guzman, Ioar             | PhD student in stream ecology                          | University of the Basque Country (UPV/EHU)                                                                                          | Spain                          |
| de Haan, Michel             | PhD                                                    | Wageningen University & Research                                                                                                    | Netherlands (the)              |
| de Haan, Myriam             | Researcher Eumycetozoa                                 | Botanic Garden Meise                                                                                                                | Belgium                        |
| de Herralde, Felicidad      | Researcher                                             | IRTA                                                                                                                                | Spain                          |
| De Jaegher, Bram            | PhD researcher                                         | Ghent university                                                                                                                    | Belgium                        |
| de Jager, Monique           | researcher / ecology                                   | netherlands institute of ecology (NIOO-KNAW)                                                                                        | Netherlands (the)              |
| de Jong, Carmen             | Professor of Hydrology                                 | University of Strasbourg                                                                                                            | France                         |
| de Jong, Elise              | Biology and environmentalism                           | University of Amsterdam                                                                                                             | Netherlands (the)              |
| de Jong, Hans               | professor                                              | Wageningen University & Research                                                                                                    | Netherlands (the)              |
| de Jong, Peter              | University Lecturer                                    | Wageningen University                                                                                                               | Netherlands (the)              |
| de Juan, Silvia             | Marie Curie Fellow, marine conservation                |                                                                                                                                     | Spain                          |
| de Juan, Silvia             | Postdoc on marine ecology                              | Institute of Marine Science                                                                                                         | Spain                          |
| De Keyzer, Els              | PhD student Marine Biology                             | KU Leuven                                                                                                                           | Belgium                        |
| de Kock, Melissa            | Climate informed conservation                          |                                                                                                                                     | South Africa                   |
| de la Cueva, Horacio        | Investigador Titular C                                 | CICESE                                                                                                                              | Mexico                         |
| de la Estrella, Manuel      | Assistant Professor in Botany                          | Universidad de Córdoba                                                                                                              | Spain                          |
| de la Fuente, Jose          | Professor Molecular biology & Biotechnology            | SaBio, IREC (CSIC-UCLM-JCCM)                                                                                                        | Spain                          |
| de La Harpe, Marylaure      | post-doc in molecular biology                          | University of Vienna                                                                                                                | Austria                        |
| de la Mata, Isabel          | Professor of Biochemistry and Molecular Biology        | Universidad Complutense de Madrid                                                                                                   | Spain                          |
| de la Mata Pombo, Raul      | Researcher/Forest genetics                             | IRTA                                                                                                                                | Spain                          |
| De la Peña, José-Antonio    | Mathemativ                                             |                                                                                                                                     | Mexico                         |
| de la Riva, Ignacio         | Tenured Researcher                                     | High Council of Scientific Research (CSIC)                                                                                          | Spain                          |
| de La Rochebrochard, Elise  | Senior Researcher, Epidemiology & Demography           | French National Demographic Institute (Ined, Paris, France)                                                                         | France                         |
| de la Rosa, Carlos          | Executive Director nonprofit conservation organization | Lindsay Wildlife Experience                                                                                                         | United States of America (the) |
| de la Rosa, Raul            | Tenured Scientist                                      | Ifapa, Junta de Andalucia                                                                                                           | Spain                          |

|                                   |                                                           |                                                                                         |                                                            |
|-----------------------------------|-----------------------------------------------------------|-----------------------------------------------------------------------------------------|------------------------------------------------------------|
| de la Rubia, Ageles               |                                                           | University Autonoma of Madrid                                                           | Spain                                                      |
| de la Selva, Sara María Teresa    | Professor / Physics                                       | Universidad Autónoma Metropolitana                                                      | Mexico                                                     |
| de la Sienra, Emilia              | Worldviews and Transformative Learning for Sustainability | University of Sydney / National Autonomous University of Mexico                         | Australia                                                  |
| de la Torre, Stella               | Professor School of Biology                               | Universidad San Francisco de Quito                                                      | Ecuador                                                    |
| de la Torre, Florencio            | Assistant Professor of Analytical Chemistry               | University of Girona                                                                    | Spain                                                      |
| de la Torre, Mayra                | Full Professor /biotechnology                             | Centro de Investigación y Desarrollo en Agrobiotecnología Alimentaria                   | Mexico                                                     |
| de las Heras Muela, Emilio        | Author of a Blog on Climate Change and Economy            | Expansion                                                                               | Spain                                                      |
| de Lavergne, Casimir              | Research associate                                        | Sorbonne University                                                                     | France                                                     |
| De León, Luis F.                  | Assistant Professor                                       | University of Massachusetts Boston                                                      | United States of America (the)                             |
| De León-Nava, Marco               | Researcher-Biomedicine                                    | Centro de Investigación Científica y de Educación Superior de Ensenada, Baja California | Mexico                                                     |
| de Lillo, Enrico                  | Full professor                                            | DiSSPA - University of Bari Aldo Moro                                                   | Italy                                                      |
| De Lirio, Elton John              |                                                           | University of São Paulo                                                                 | Brazil                                                     |
| de Mahieu, Aurore                 | Research assistant                                        | Catholic University of Louvain                                                          | Belgium                                                    |
| De Matteis, Alessandro            | Research Fellow                                           | University of East Anglia                                                               | United Kingdom of Great Britain and Northern Ireland (the) |
| De Meester, Nele                  | Postdoc                                                   | Ghent University                                                                        | Belgium                                                    |
| de Mello, Kaline                  | postdoc                                                   | University of São Paulo                                                                 | Brazil                                                     |
| De Mello, Rodrigo                 | Professor/Biologist (Ecology)                             | Universidade Estadual de Ponta Grossa (UEPG)                                            | Brazil                                                     |
| de Mello Martins, Felipe          | postdoc                                                   | University of Sao Paulo                                                                 | Brazil                                                     |
| de Mello Neto, Joao               | Professor of Physics                                      | Federal University of Rio de Janeiro                                                    | Brazil                                                     |
| de Melo, Filipe Augusto Gonçalves | Biologist/Ichthyologist                                   | Universidade Estadual do Piauí                                                          | Brazil                                                     |
| de Mendonça, Philippe Gil         | Research Scientist (Biology: Epidemiology)                | CESAM (University of Lisbon)                                                            | Portugal                                                   |
| De Miguel Rubio, Ramon Jose       | Researcher and Business manager / Freshwater ecosystems   | Guadalictio / University of Cordoba                                                     | Spain                                                      |
| DE OLIVEIRA, DANIEL               | Doctorate Student                                         | Universidade Federal do Rio de Janeiro                                                  | Brazil                                                     |
| DE OLIVEIRA, RAQUEL MARIA         | PROFESSORA DA MEDICINA VETERINÁRIA                        | ESCOLA DE MVETERINÁRIA E ZOOTECNIA DA UNIVERIDADE FEDERAL DE GOIÁS                      | Brazil                                                     |
| de Oliveira Bredariol, Tomás      | Environmental Engineer and Environmental analyst          | IBAMA                                                                                   | Brazil                                                     |
| de Oliveira Roque, Fabio          | Professor/Ecology                                         | UFMS                                                                                    | Brazil                                                     |
| De Palmas, Stéphane               | PhD Candidate                                             | Academia Sinica, National Taiwan Normal University                                      | Taiwan                                                     |
| de Paula, Eneida                  | Full Professor                                            | University of Campinas                                                                  | Brazil                                                     |
| de Paula-Souza, Juliana           | Professor/Researcher in Plant Systematics                 | Universidade Federal de São João del Rei                                                | Brazil                                                     |
| de Pedro Carracedo, Javier        | Lecturer                                                  | University of Alcalá                                                                    | Spain                                                      |
| de Pietri, Aroa                   | Graduate student                                          | University of Ghent                                                                     | Belgium                                                    |
| De Potter, Kristell               | Environmental sciences                                    | Université Libre de Bruxelles                                                           | Belgium                                                    |
| de Rijcke, Sarah                  | Professor of Science, Technology and Innovation Studies   | Leiden University                                                                       | Netherlands (the)                                          |
| de Rochambeau, Hubert             | Animal genetics                                           | Inra                                                                                    | France                                                     |
| De Roo, Linus                     | PhD student, tree survival under climate change           | Ghent University                                                                        | Belgium                                                    |

|                                          |                                                                                                                                      |                                                                                          |                                                            |
|------------------------------------------|--------------------------------------------------------------------------------------------------------------------------------------|------------------------------------------------------------------------------------------|------------------------------------------------------------|
| de Ruiter, Marleen                       | Researcher of natural disasters                                                                                                      | Institute for environmental studies                                                      | Netherlands (the)                                          |
| De Schutter, Olivier                     | Governance                                                                                                                           | UCLouvain                                                                                | Belgium                                                    |
| de Sède-Marceau, Marie-Hélène            | Professor-Geography                                                                                                                  | University of Franche-Comté                                                              | France                                                     |
| De Serio, Francesca                      | Senior Researcher                                                                                                                    | Polytechnic University of Bari                                                           | Italy                                                      |
| de Silva, Shermin                        | Conservation biologist                                                                                                               | Trunks & Leaves Inc.                                                                     | United States of America (the)                             |
| De Sousa Bastos, Lydiane Lucia           |                                                                                                                                      | Universidade Federal de Viçosa                                                           | Brazil                                                     |
| de Souza, Vitor                          | Professor / Physics                                                                                                                  | University of Sao Paulo                                                                  | Brazil                                                     |
| de Souza Werneck, Márcio                 | Plant Ecology                                                                                                                        | Universidade Federal do ABC                                                              | Brazil                                                     |
| de Thoisy, Benoit                        | Science Director                                                                                                                     | Kwata NGO                                                                                | French Guiana                                              |
| De Troyer, Niels                         | Academic Assistant - PhD Candidate                                                                                                   | Ghent University                                                                         | Belgium                                                    |
| de Vareilles, Héloïse                    | Engineer pursuing PhD, Neuroscience                                                                                                  | CEA                                                                                      | France                                                     |
| de Vera, Jean-Pierre Paul                | Research Group Leader / Astrobiology                                                                                                 | German Aerospace Center (DLR)                                                            | Germany                                                    |
| de Vicente Alvarez-Manzaneda, Inmaculada | Associate Professor- Ecology                                                                                                         | University le Granada                                                                    | Spain                                                      |
| de Vienne, Dominique                     | Emeritus professor in biology                                                                                                        |                                                                                          | France                                                     |
| de Vienne, Damien                        | CNRS researcher                                                                                                                      | Laboratoire de Biométrie et Biologie Évolutive                                           | France                                                     |
| de Vilchez Moragues, Pau                 | Professor Ajudant de Dret Internacional Públic i subdirector del Laboratori Interdisciplinari sobre Canvi Climàtic de la UIB (LINCC) | Universitat de les Illes Balears UIB                                                     | Spain                                                      |
| de Villiers, Marienne                    | Ecologist                                                                                                                            | CapeNature                                                                               | South Africa                                               |
| De Visscher, Lander                      | PhD student in Bioscience Engineering                                                                                                | Ghent University                                                                         | Belgium                                                    |
| De Vleeschouwer, Kristel                 | Conservation Biologist                                                                                                               | Royal Zoological Society of Antwerp                                                      | Belgium                                                    |
| de Vries, Anne                           | PhD candidate and lecturer                                                                                                           | Tilburg University                                                                       | Netherlands (the)                                          |
| de Vries, Geert                          | Sociology                                                                                                                            | Vrije Universiteit Amsterdam                                                             | Netherlands (the)                                          |
| de Vries, Mindert                        | Specialist Advisor Nature Based Solutions                                                                                            | Deltares                                                                                 | Netherlands (the)                                          |
| De Vroey, Mathilde                       | PhD candidate - Geomatics                                                                                                            | Earth and Life Institute - UCLouvain                                                     | Belgium                                                    |
| De Waart, Jules                          | Geoscience                                                                                                                           | University of Amsterdam                                                                  | Netherlands (the)                                          |
| de Wergifosse, Louis                     | PhD student                                                                                                                          | UCLouvain                                                                                | Belgium                                                    |
| Deal, Morgan                             | Postdoctoral researcher in Astrophysics                                                                                              | Instituto de Astrofísica e Ciências do Espaço (IA)                                       | France                                                     |
| Dean, Samantha                           | Science Lab Coordinator, Adjunct Professor, Herpetologist                                                                            | University of Baltimore                                                                  | United States of America (the)                             |
| Dean, Joshua                             | Lecturer in Biogeochemical Cycles                                                                                                    | University of Liverpool                                                                  | United Kingdom of Great Britain and Northern Ireland (the) |
| Debnath, Nirmal                          | Doctoral student                                                                                                                     | Department of Ecology and Environmental Science, Assam University, Silchar-788011, INDIA | India                                                      |
| Deboyser, Bernard                        | Engineer and teacher                                                                                                                 | University of Mons (Belgium)                                                             | Belgium                                                    |
| Debray, Jérôme                           | Engineer                                                                                                                             | CNRS                                                                                     | France                                                     |
| DeBruyn, Jennifer                        | Associate Professor, Environmental and Soil Science                                                                                  | University of Tennessee                                                                  | United States of America (the)                             |
| Debusscher, Bos                          | Researcher                                                                                                                           | Ghent University                                                                         | Belgium                                                    |
| Decelle, Sophie                          |                                                                                                                                      | Association du Calao asbl                                                                | Senegal                                                    |
| Dechesne, Arnaud                         | Senior Researcher, Environmental Microbiology                                                                                        | Technical University of Denmark                                                          | Denmark                                                    |
| Dechoum, Michele                         | Assistant Professor                                                                                                                  | Federal University of Santa Catarina                                                     | Brazil                                                     |

|                          |                                                          |                                                                                       |                                                            |
|--------------------------|----------------------------------------------------------|---------------------------------------------------------------------------------------|------------------------------------------------------------|
| Deckers, Patrick         | Orthopedic Surgeon                                       | Zuyderland Hospital                                                                   | Netherlands (the)                                          |
| Decotte, Eva             | Family Doctor, medical students supervisor               | University Toulouse III Paul Sabatier                                                 | France                                                     |
| DECURTIS, CHARLES        | Freshwater Conservation Program Manager                  | The Nature Conservancy                                                                | United States of America (the)                             |
| Decuyper, Mathieu        | Research Fellow                                          | Wageningen University                                                                 | Netherlands (the)                                          |
| Dedeine, Franck          | Assistant Professor in evolutionary ecology              | University of Tours                                                                   | France                                                     |
| Deegan, Linda            | Senior Scientist                                         | Woods Hole Research Center                                                            | United States of America (the)                             |
| Deeley, David            | Associate Adjunct Professor, Ecologist                   | University of Western Australia                                                       | Australia                                                  |
| Defolie, Charlotte       | Behavioural Ecology                                      | University of Göttingen                                                               | Germany                                                    |
| Defrance, Dimitri        | Post Doctoral position                                   | INRA                                                                                  | France                                                     |
| Degli-Esposti, Davide    | Research scientist                                       | National Research Institute of Science and Technology for Environment and Agriculture | France                                                     |
| Deguilloux, Marie-France | Maître de Conférences - Génétique                        | Bordeaux University                                                                   | France                                                     |
| Deguines, Nicolas        | Postdoctoral research fellow (Ecology)                   | Université Paris-Sud                                                                  | France                                                     |
| Dehalt, Annette          | Biologist/Instructor                                     | Camosun College                                                                       | Canada                                                     |
| Dehez, Pierre            | Economics                                                | University of Louvain, Louvain-la-Neuve                                               | Belgium                                                    |
| Dehnhard, Nina           | Senior Research Fellow / Seabird Ecology                 | Norwegian Institute for Nature Research                                               | Norway                                                     |
| Deinet, Stefanie         | Postgraduate Research Assistant                          | Zoological Society of London                                                          | United Kingdom of Great Britain and Northern Ireland (the) |
| Deisinger, Julia         | PhD student in microbiology                              | Medical microbiology                                                                  | Germany                                                    |
| Dejardin, Emmanuel       | Head of the Lab of Mol. Immunology & Signal Transduction | University of Liège                                                                   | Belgium                                                    |
| del Campo, Rubén         | Postdoctoral researcher in Freshwater Ecology            | IGB - Berlin                                                                          | Germany                                                    |
| del Moral, Roger         | Ecology Profssor Emeritus                                | University of Washington                                                              | United States of America (the)                             |
| Del Toro Orozco, Wezddy  | Reseracher                                               | Mamirauá Sustainable Development Institute                                            | Brazil                                                     |
| Del Valle, Antonio       | Wildlife Ecology                                         |                                                                                       | United States of America (the)                             |
| Del-Claro, Kleber        | Research Director                                        | Universidade Federal de Uberlândia                                                    | Brazil                                                     |
| Delabie, Jacques Hubert  | Research Entomologist                                    | Cocoa Research Center                                                                 | Brazil                                                     |
| Delacharlerie, Sophie    | Bioengineer                                              | SPW                                                                                   | Belgium                                                    |
| Delahaie, Boris          | Post-doctoral Research Associate / Ecology and Evolution | University of Cambridge                                                               | United Kingdom of Great Britain and Northern Ireland (the) |
| Delannoy, Louis          | PhD student                                              | INRIA / UGA                                                                           | France                                                     |
| Délano-Frier, John       | Research Professor                                       | Centro de Investigación y de Estudios Avanzados del IPN (Cinvestav), Unidad Irapuato  | Mexico                                                     |
| Delarue, Marianne        | Professor                                                | Université Paris Sud                                                                  | France                                                     |
| Delattre, Hélène         | Engineer, Geosciences                                    | University of Franche-Comté                                                           | France                                                     |
| Delaye, Luis             | PI                                                       | Cinvestav Irapuato                                                                    | Mexico                                                     |
| Delbene, Claudio         | Arquitecto                                               | FADU-UBA                                                                              | Argentina                                                  |
| Delefortrie, Zoé         | PhD candidate                                            | Indiana State University                                                              | United States of America (the)                             |
| DeLeon, Jenni            | MD                                                       |                                                                                       | United States of America (the)                             |
| Delescluse, Matthias     | Assistant Profeasor, Geophysicist                        | Ecole Normale Supérieure de Paris                                                     | France                                                     |
| delestrade, anne         | researcher ecology                                       | research centre of alpine ecosystems                                                  | France                                                     |
| Deleys, Noémie           | Ecology, marine environment                              | ifremer                                                                               | France                                                     |

|                              |                                                            |                                                                                      |                                                            |
|------------------------------|------------------------------------------------------------|--------------------------------------------------------------------------------------|------------------------------------------------------------|
| Delforge, Pierre             | Orchidologist                                              | IUCN                                                                                 | Belgium                                                    |
| Delfraro, Adriana            | Associate Professor of virology                            | Universidad de la República                                                          | Uruguay                                                    |
| Delgadillo Ordóñez, Nathalia | Biologist, Master in Environmental Science and Engineering | King Abdullah University of Science and Technology                                   | Colombia                                                   |
| Delgado, Alonso              | Researcher oceanic invertebrate systematics                | Portland State University                                                            | United States of America (the)                             |
| Delgado, M Dolores           | Professor of Molecular Biology                             | University                                                                           | Spain                                                      |
| Delgado Granados, Hugo       | Researcher / Glaciology                                    | Universidad Nacional Autónoma de México                                              | Mexico                                                     |
| Delgado-Correal, Camilo      | Researcher                                                 | GCPA                                                                                 | Colombia                                                   |
| Delhay, Guillaume            | PhD Ecology                                                | Université Libre de Bruxelles                                                        | Belgium                                                    |
| Delibes-Mateos, Miguel       | Senior researcher                                          | Instituto de Estudios Sociales Avanzados (IESA-CSIC)                                 | Spain                                                      |
| Dell Oro, Melanie            | Nutritional Scientist                                      |                                                                                      | Germany                                                    |
| Dell'Ambrogio, Gilda         | scientific assistant, ecotoxicology                        | Ecotox Centre                                                                        | Switzerland                                                |
| Dell'Arciccia, Gaia          | Seabird scientist                                          | Auckland Council                                                                     | New Zealand                                                |
| Della Valle, Nives           | Senior Researcher                                          | Eurac Research                                                                       | Italy                                                      |
| Dellape, Pablo M.            | Researcher CONICET                                         | Museo de La Plata                                                                    | Argentina                                                  |
| DellaSala, Dominick          | Chief Scientist                                            | Geos Institute                                                                       | United States of America (the)                             |
| DELMAS, Lucile               | MFSD                                                       | IFREMER                                                                              | France                                                     |
| Delord, Karine               | Research Engineer                                          | CNRS                                                                                 | France                                                     |
| Delpierre, Nicolas           | Assistant professor in Ecology                             | Université Paris-Sud                                                                 | France                                                     |
| Delrez, Laetitia             | Postdoctoral researcher in Astrophysics                    | University of Cambridge                                                              | United Kingdom of Great Britain and Northern Ireland (the) |
| Delroisse, Jérôme            | Researcher                                                 | University of Mons                                                                   | Belgium                                                    |
| Delsuc, Frédéric             | Research Director in Evolutionary Biology                  | Centre National de la Recherche Scientifique (CNRS)                                  | France                                                     |
| Deluen, Marine               | PhD student                                                | CNRS                                                                                 | France                                                     |
| Deluro, Christine            | Engineer                                                   | UCLA                                                                                 | United States of America (the)                             |
| DeLuycker, Anneke            | Associate Professor, Conservation Biology                  | Smithsonian-Mason School of Conservation, Smithsonian Conservation Biology Institute | United States of America (the)                             |
| Delva, Pacôme                | Assistant professor                                        | Sorbonne Université                                                                  | France                                                     |
| Délye, Christophe            | Scientist, Agronomy                                        | INRA                                                                                 | France                                                     |
| Demarchi, Layon Oreste       | PhD Student in Botany                                      | INPA                                                                                 | Brazil                                                     |
| DeMartini, Edward            | Adjunct Professor                                          | University of Hawaii, Hawaii Institute of Marine Biology                             | United States of America (the)                             |
| Demarty, Jerome              | Researcher Dr in ecohydrology                              | Research Institute of the Development (IRD)                                          | France                                                     |
| dembo, ron                   | lifetime Fellow                                            | Fields Institute                                                                     | Canada                                                     |
| Dembowski, MD, Christoph     | Pediatrician                                               | IPPNW                                                                                | Germany                                                    |
| Demeneix, Barbara            | Professor of Endocrinology                                 | Museum National d'Histoire Naturelle/ CNRS Paris                                     | France                                                     |
| DEMENOIS, Julien             | "4 per 1000" correspondent / Ecology                       | CIRAD                                                                                | France                                                     |
| Demol, Miro                  | PhD                                                        | Ghent University                                                                     | Belgium                                                    |
| Demsar, Urska                | Associate Professor in Geoinformatics                      | University of St Andrews                                                             | United Kingdom of Great Britain and Northern Ireland (the) |
| den Blaauwen, Tanneke        | Associate Prof Bacterial Cell Biology                      | Swammerdam Institute for Life Sciences                                               | Netherlands (the)                                          |
| Dendoncker, Morgane          | forest ecology                                             | Earth and Life Institute, UCLouvain                                                  | Belgium                                                    |

|                        |                                                                |                                                       |                                                            |
|------------------------|----------------------------------------------------------------|-------------------------------------------------------|------------------------------------------------------------|
| Denham, Charles        | Geophysicist (Retired)                                         | U.S. Geological Survey                                | United States of America (the)                             |
| Denkinger, Michael     | Internal Medicine                                              | Ulm University                                        | Germany                                                    |
| Dennig, Sr., Paul      | Materials Science and Engineering/Electrical Engineering       |                                                       | United States of America (the)                             |
| Denning, Rod           | District Forester / Forestry                                   | Oceana Conservation District                          | United States of America (the)                             |
| Dennings, Kelley       |                                                                | Center for Biological Diversity                       | United States of America (the)                             |
| Dennis, Paul           | Senior Lecturer                                                | UQ                                                    | Australia                                                  |
| Denvir, Audrey         | Geography                                                      | University of Texas                                   | United States of America (the)                             |
| DEO, MUSHAGALUSA       | RESEARCHER, FISH ECOLOGY & BEHAVIOR                            | CENTRE OF RESEARCH ON HYDROBIOLOGY                    | Congo (the Democratic Republic of the)                     |
| DEPANNEMAECKER, Damien | Post-Doc Neurosciences                                         | CNRS                                                  | France                                                     |
| Depaulis, Frantz       | researcher in Ecology and Evolution                            | CNRS                                                  | France                                                     |
| Depauw, Leen           | PhD Forest and Nature research                                 | Ghent University                                      | Belgium                                                    |
| Depecker, Jonas        | PhD researcher                                                 | KU Leuven                                             | Belgium                                                    |
| derand, david          | Head of Durrell Conservation Training                          | Durrell Wildlife Conservation Trust                   | Mauritius                                                  |
| Derbyshire, Mark       | Research fellow                                                | Curtin University                                     | Australia                                                  |
| Derbyshire, Ellen      | PhD student in Quantum Computing                               | University of Edinburgh                               | United Kingdom of Great Britain and Northern Ireland (the) |
| DeRepentigny, Patricia | PhD Candidate, Arctic sea ice and climate modeling             | University of Colorado Boulder                        | United States of America (the)                             |
| Dérér, Patricia        | Biologist                                                      | Gothenburg University                                 | Sweden                                                     |
| Dereze, Sebastiaan     | Post-doc                                                       | Ghent University                                      | Belgium                                                    |
| Derežanin, Lorena      | PhD student in Evolutionary Biology - Genomics                 | Leibniz Institute for Zoo and Wildlife Research (IZW) | Germany                                                    |
| Derham, Tristan        | PhD Candidate, Ecology                                         | UNiversity of Tasmania                                | Australia                                                  |
| Deri, Eszter           | Conservation Ecology                                           |                                                       | United Kingdom of Great Britain and Northern Ireland (the) |
| Derouard, Jacques      | Professor, Physics                                             | University Grenoble-Alpes                             | France                                                     |
| Derraik, José          | Senior Research Fellow (Public Health)                         | Liggins Institute - University of Auckland            | New Zealand                                                |
| DERRIEN, Solene        | Ingineer Assistant in Instrumentation for Atmospheric Research | CNRS - Aerology Laboratory (Laboratoire d'Aerologie)  | France                                                     |
| Derting, Terry         | Professor Biological Sciences                                  | Murray State University                               | United States of America (the)                             |
| Dery, Stephen          | Professor                                                      | University of Northern British Columbia               | Canada                                                     |
| DESAGHER, Solange      | staff scientist in cell biology                                | CNRS                                                  | France                                                     |
| DeSantis, Dominic      | Ecology and Evolutionary Biology                               | University of Texas at El Paso                        | United States of America (the)                             |
| Desbiez, Arnaud        | President, founder                                             | ICAS- Instituto de Conservacao de Animais Silvestres  | Brazil                                                     |
| Descalzo, Esther       | PhD student                                                    | Instituto de Investigación de Recursos Cinegéticos    | Spain                                                      |
| Descamps, Estelle      | Cell biologist                                                 | The Francis Crick Institute                           | United Kingdom of Great Britain and Northern Ireland (the) |
| Descamps, Charlotte    | PhD student - Ecology (plant-pollinator interactions)          | UCLouvain                                             | Belgium                                                    |
| Desclaux, Alice        | Professor                                                      | IRD                                                   | France                                                     |
| Descroix, Luc          | Senior investigator in Hydrology                               | IRD Institut de Recherche pour le Développement       | France                                                     |
| Desmit, Xavier         | Researcher marine ecosystem                                    | Royal Belgian Institute of Natural Sciences           | Belgium                                                    |
| DESOUHANT, Emmanuel    | Prof in Evolutionary Ecology                                   | University Lyon                                       | France                                                     |

|                                |                                                    |                                                                                                                  |                                                            |
|--------------------------------|----------------------------------------------------|------------------------------------------------------------------------------------------------------------------|------------------------------------------------------------|
| Despax, Aurélien               | Scientist, River Hydraulics                        | Irstea                                                                                                           | France                                                     |
| Despres, Laurence              | Professor Evolutionary Ecology                     | University Grenoble Alpes                                                                                        | France                                                     |
| Dessolin, Jean                 | Research Chemoinformatics                          | CNRS-Bordeaux University                                                                                         | France                                                     |
| Destainville, Nicolas          | Full Professor, Theoretical Physics and Biophysics | Univ. Toulouse III-Paul Sabatier                                                                                 | France                                                     |
| Desvars-Larrive, Amélie        | Assistant Professor in Veterinary Public Health    | Veterinary University of Vienna, Austria                                                                         | Austria                                                    |
| Desvignes, Thomas              | Research Associate in Biology                      | University of Oregon                                                                                             | United States of America (the)                             |
| Dettai, Agnes                  | Molecular Evolution and Biodiversity               | MNHN                                                                                                             | France                                                     |
| Deutekom, Eva                  | Ph.D. candidate                                    | Utrecht University                                                                                               | Netherlands (the)                                          |
| DeVantier, Lyndon              | Coral Reef Ecology                                 | Coral Reef Research                                                                                              | Australia                                                  |
| Devarajan, Kadambari           | PhD Candidate - Ecology and Evolutionary Biology   | University of Massachusetts, Amherst                                                                             | India                                                      |
| Devaux, Céline                 | Ecology and Evolution                              | University of Montpellier                                                                                        | France                                                     |
| Devenish-Nelson, Ellie         | Teaching Fellow                                    | University of Edinburgh                                                                                          | United Kingdom of Great Britain and Northern Ireland (the) |
| Devides Castello, Ana Carolina | Research                                           | Instituto Nacional da Mata Atlântica                                                                             | Brazil                                                     |
| Devillers, Rodolphe            | Professor of Geography                             | Memorial University of Newfoundland                                                                              | Canada                                                     |
| Devine, Carol                  | Research Fellow                                    | Dahdaleh Institute for Global Health Research                                                                    | Canada                                                     |
| Devitt, Thomas                 | Research Affiliate/Research Fellow                 | University of Texas at Austin                                                                                    | United States of America (the)                             |
| Devlin, Tadhg                  | PhD Student                                        | University of Edinburgh                                                                                          | United Kingdom of Great Britain and Northern Ireland (the) |
| Devlin-Kelly, Inez             | Professor Emerita, Biology                         | Bakersfield College                                                                                              | United States of America (the)                             |
| Devloo-Delva, Floriaan         | PhD candidate                                      | University of Tasmania                                                                                           | Australia                                                  |
| Devries, James                 | Research Scientist - Waterfowl Ecology             |                                                                                                                  | Canada                                                     |
| Dewar, Colin                   | Consultant Emergency Medicine                      | Western Sussex Hospitals                                                                                         | United Kingdom of Great Britain and Northern Ireland (the) |
| DeWaters, Jan                  | Associate Professor                                | Clarkson University                                                                                              | United States of America (the)                             |
| deYoung, Brad                  | Professor/Oceanographer                            | Memorial University                                                                                              | Canada                                                     |
| Dezileau, Laurent              | Professor                                          | University of Caen Normandy                                                                                      | France                                                     |
| Dhami, manpreet                | Researcher                                         | Manaaki Whenua Landcare Research                                                                                 | New Zealand                                                |
| Dhaou, Dounia                  | PhD candidate                                      | Aix-Marseille University                                                                                         | France                                                     |
| Dhar, Avinash                  | Theoretical Physics                                | International Centre for Theoretical Sciences of The Tata Institute of Fundamental Research                      | India                                                      |
| Dheer, Arjun                   | PhD student in Evolutionary Ecology                | IZW-Berlin                                                                                                       | Germany                                                    |
| Dhiedt, Els                    | PhD student - bioscience engineering               | Ghent University                                                                                                 | Belgium                                                    |
| Di Bitetti, Mario              | Principal Researcher; Ecologist                    | National Research Council (CONICET)                                                                              | Argentina                                                  |
| Di Dario, Fabio                | Associate Professor                                | Federal University of Rio de Janeiro (UFRJ)                                                                      | Brazil                                                     |
| Di Filippo, Alfredo            | Associate Professor of Botany                      | Università della Tuscia                                                                                          | Italy                                                      |
| Di Giacomo, Adrián S.          | Researcher, Ornithology & Conservation Biology     | Laboratorio de Biología de la Conservación, Centro de Ecología Aplicada del Litoral (CECOAL-CONICET), Corrientes | Argentina                                                  |
| Di Martino, Rosaria            | Post Doctoral Fellow                               | Institute of Cellular Biochemistry and Biology                                                                   | Italy                                                      |
| Di Martino, Rita               | PhD Student in Microbiology                        | University of Lausanne                                                                                           | Switzerland                                                |
| Di Muzio, Enrico               | Researcher, meteorology                            | Karlsruhe Institute of Technology                                                                                | Germany                                                    |

|                           |                                                                                      |                                                         |                                                            |
|---------------------------|--------------------------------------------------------------------------------------|---------------------------------------------------------|------------------------------------------------------------|
| Di Natale, Carlo          | Msc Marine Science                                                                   |                                                         | Italy                                                      |
| Diamond, Sarah            | Assistant Professor / George B. Mayer Chair in Urban and Environmental Studies       | Case Western Reserve University                         | United States of America (the)                             |
| Diamond, Miriam           | Professor, Environmental Chemistry                                                   | University of Toronto                                   | Canada                                                     |
| DIANESE, JOSE             |                                                                                      | UNIVERSIDADE DE BRASÍLIA                                | Brazil                                                     |
| Diano, Matteo             | Assistant Professor of Physiology                                                    | Department of Psychology, University of Turin           | Italy                                                      |
| Dias, António             | Engineer                                                                             |                                                         | Portugal                                                   |
| Dias, Pedro               | Researcher, behavioral ecology                                                       | Universidad Veracruzana                                 | Mexico                                                     |
| Dias dos Santos, Thiago   | Postdoctoral Scholar                                                                 | University of California, Irvine                        | United States of America (the)                             |
| Diatta, Jean              | Agrochemistry and Environmental Biogeochemistry                                      | Poznan University of Life Sciences                      | Poland                                                     |
| Diaz, Clara               | PhD student - mesophotic reefs                                                       | University of Plymouth                                  | United Kingdom of Great Britain and Northern Ireland (the) |
| Diaz, Ivonne del C.       | Professor                                                                            | University of Puerto Rico at Mayaguez                   | Puerto Rico                                                |
| Diaz, Francisca P.        | Postdoc researcher/ Ecology                                                          | Pontificia Universidad Catolica de Chile                | Chile                                                      |
| Diaz, Monica              | Researcher                                                                           | CONICET                                                 | Argentina                                                  |
| Diaz, Julio               | Head of Deparment Epidemiology and Biostatistic                                      | Carlos III Institute of Health                          | Spain                                                      |
| Diaz, Paloma              | PhD student                                                                          | Universidad Rey Juan Carlos                             | Spain                                                      |
| DIAZ, ALEXANDER           | Educational Psychology                                                               | University of Alberta                                   | Canada                                                     |
| Diaz Cosín, Dario         | Emeritus Professor                                                                   | Universidad Complutense                                 | Spain                                                      |
| Diaz Gomez, Andrea Romina | Postdoc Dr biological science                                                        | University of La Plata                                  | Argentina                                                  |
| Díaz Rubio, Gery Andrés   | PhD student in Statistical Sciences, Teaching Assistant in Statistics and Economics  | University of Bologna                                   | Italy                                                      |
| Diaz-Aguirre, Fernando    | Marine Biologist, PhD.                                                               |                                                         | Australia                                                  |
| Diaz-Almela, Elena        | Contracted researcher, marine ecology                                                | CEAB-CSIC                                               | Spain                                                      |
| Diaz-Camino, Claudia      | Scientific research/ Plant Molecular Biology                                         | Universidad Nacional Autónoma de México                 | Mexico                                                     |
| Díaz-Delgado, Ricardo     | Head of Remote Sensing and GIS Lab                                                   | Estación Biológica de Doñana-CSIC                       | Spain                                                      |
| Diaz-Sierra, Ruben        | Associate Professor of Applied Physics                                               | Universidad Nacional de Educación a Distancia UNED      | Spain                                                      |
| Diaz-Varela, Emilio       | Associate Professor                                                                  | University of Santiago de Compostela                    | Spain                                                      |
| Diazgranados, Mauricio    | Research Leader - Diversity & Livelihoods, Natural Capital & Plant Health Department | Royal Botanic Gardens, Kew                              | United Kingdom of Great Britain and Northern Ireland (the) |
| Dibella, Emiliano         | Licenciado en Sociología, Investigador en Agroecología                               | INTA (Instituto Nacional de Tecnología Agropecuaria)    | Argentina                                                  |
| Dickens, Jeremy           | Ornithologist, Evolutionary Biologist and Ecologist                                  | Fundación Para La Tierra                                | South Africa                                               |
| Dickie, Ian               | Professor of Microbial Ecology                                                       | School of Biological Sciences, University of Canterbury | New Zealand                                                |
| Dickie, Melanie           | Ecology - Research Assistant                                                         | Alberta Biodiversity Monitoring Institute               | Canada                                                     |
| Dickinson, Katharine      | Professor of Plant Ecology                                                           | University of Otago                                     | New Zealand                                                |
| Dickinson, Janis          | Professor Emerita in Department of Natural Resources                                 | Cornell University                                      | United States of America (the)                             |
| Dickinson, Federico       | Senior Researcher                                                                    | Department of Human Ecology, Cinvestav                  | Mexico                                                     |
| Dickinson, Robert         | Lecturer, Physics                                                                    | University of Manchester                                | United Kingdom of Great Britain and Northern Ireland (the) |

|                           |                                                       |                                                                                                                           |                                                            |
|---------------------------|-------------------------------------------------------|---------------------------------------------------------------------------------------------------------------------------|------------------------------------------------------------|
| Dickman, Amy              | Kaplan Senior Research Fellow                         | University of Oxford                                                                                                      | United Kingdom of Great Britain and Northern Ireland (the) |
| Dickman, Christopher      | Professor in Ecology                                  | The University of Sydney                                                                                                  | Australia                                                  |
| Dickman, Alan             | professor emeritus, environmental studies and biology | University of Oregon                                                                                                      | United States of America (the)                             |
| Dickson, Christopher      | PhD Graduate, Astrophysics                            | Cardiff University                                                                                                        | United Kingdom of Great Britain and Northern Ireland (the) |
| Didier, ROGUET            | curator                                               | Conservatoire et Jardin botaniques de Genève                                                                              | Switzerland                                                |
| Didry, Morgane            | Marine biologist                                      | AMU - MIO                                                                                                                 | France                                                     |
| Diele-Viegas, Luisa Maria | Postdoctoral researcher                               | Federal University of Bahia                                                                                               | Brazil                                                     |
| Dierking, Jan             | Marine Ecology                                        | GEOMAR Helmholtz Centre for Ocean Research Kiel                                                                           | Germany                                                    |
| Diesing, Markus           | Marine Geologist                                      |                                                                                                                           | Norway                                                     |
| Dietemann, Vincent        | Senior Scientist                                      | Agroscope                                                                                                                 | Switzerland                                                |
| Dietrich, Kim             | Biologist                                             |                                                                                                                           | United States of America (the)                             |
| Dietterich, Thomas        | Professor (Emeritus) of Computer Science              | Oregon State University                                                                                                   | United States of America (the)                             |
| Dietzel, Andreas          | PhD candidate                                         | James Cook University                                                                                                     | Australia                                                  |
| Dievart, Anne             | Researcher Biology                                    | CIRAD                                                                                                                     | France                                                     |
| Díez Díaz, Verónica       |                                                       | Museum für Naturkunde - Leibniz Institute for Evolution and Biodiversity Science Invalidenstrasse 43 10115 Berlin Germany | Germany                                                    |
| Dijkstra, Henk A.         | Professor of Physics                                  | Utrecht University                                                                                                        | Netherlands (the)                                          |
| Dill, Lawrence            | Professor Emeritus, Behavioural Ecology               | Simon Fraser University                                                                                                   | Canada                                                     |
| Dilworth, Jenna           | MSc Student                                           | University of Miami - Rosenstiel School of Marine and Atmospheric Science                                                 | United States of America (the)                             |
| Dima, Bálint              | Researcher in mycology                                | Department of Plant Anatomy, Institute of Biology, Eötvös Loránd University                                               | Hungary                                                    |
| Dimitras, Elisabeth       | Fellow researcher                                     | University of the Aegean / Université Montpellier 2                                                                       | Greece                                                     |
| Dimitriu, Tatiana         | post-doctoral researcher in evolutionary biology      | University of Exeter                                                                                                      | United Kingdom of Great Britain and Northern Ireland (the) |
| Dimitriu, Andrés          | Professor, communication, political ecology           | Universidad Nacional del Comahue                                                                                          | Argentina                                                  |
| Dimov, Luben              | Forestry                                              | University of Vermont                                                                                                     | United States of America (the)                             |
| Dines, James              |                                                       | Natural History Museum of Los Angeles County                                                                              | United States of America (the)                             |
| Ding, Pisheng             | Assistant Professor of Mathematics                    | Illinois State University                                                                                                 | United States of America (the)                             |
| Diniz, Pedro              |                                                       | Universidade Vila Velha                                                                                                   | Brazil                                                     |
| Dinsdale, Adam            |                                                       | Monash University                                                                                                         | Australia                                                  |
| Dion, Iris-amata          | PhD student                                           | Cnrm                                                                                                                      | France                                                     |
| Dion, Pierre-Paul         | PhD student, plant biology                            | Laval University                                                                                                          | Canada                                                     |
| Diongue Niang, Aïda       | Adviser / Meteorology                                 | ANACIM                                                                                                                    | Senegal                                                    |
| Diorio, Luis              | Dr. Cs. Biológicas                                    | FCEyN, UBA                                                                                                                | Argentina                                                  |
| Dipierri, Ana Alicia      | PhD researcher                                        | Université libre de Bruxelles                                                                                             | Belgium                                                    |
| Diplock, Nathan           | PhD Student, Plant Biology                            | University of California, Berkeley                                                                                        | United States of America (the)                             |
| DiRuggiero, Jocelyne      | Professor/microbiology                                | Johns Hopkins University                                                                                                  | United States of America (the)                             |
| Dirzo, Rodolfo            | Professor                                             | Stanford University                                                                                                       | United States of America (the)                             |

|                                        |                                               |                                                |                                                            |
|----------------------------------------|-----------------------------------------------|------------------------------------------------|------------------------------------------------------------|
| Ditchfield, Arlene                     | Senior research associate                     | Scottish Association for Marine Science        | United Kingdom of Great Britain and Northern Ireland (the) |
| Dittmer, Jessica                       | Biologist/Ecologist                           | University of Milan                            | Italy                                                      |
| Dittrich, Carolin                      | Doctoral researcher in Evolutionary Ecology   | Museum für Naturkunde Berlin                   | Germany                                                    |
| Dittrich, Vinícius Antonio de Oliveira | Professor, Botany                             | Universidade Federal de Juiz de Fora           | Brazil                                                     |
| Dixon, Emily                           | Horticulture                                  | Oregon State University                        | United States of America (the)                             |
| Dixon, Nicholas                        | Distinguished Professor, Biological Chemistry | University of Wollongong                       | Australia                                                  |
| Dixon, K.C.                            | Geographer                                    |                                                | United States of America (the)                             |
| Dizengremel, Pierre                    | Professor emeritus in plant physiology        | Université de Lorraine                         | France                                                     |
| Djurfeldt, Mikael                      | Researcher in Neuroinformatics                | KTH                                            | Sweden                                                     |
| Dlouha, Jana                           | Researcher - Tree biomechanics                |                                                | France                                                     |
| Dlouhá, Jana                           | researcher                                    | Charles University Environment Centre          | Czech Republic (the)                                       |
| Dlouhý, Jiří                           | Head of department/Environmental education    | Charles University Environment Centre          | Czech Republic (the)                                       |
| do Carmo Loch, Vivian                  | PhD student in Agroecology                    | State University of Maranhão                   | Brazil                                                     |
| Dobbelaar, Emiel                       | PhD Student in Chemistry                      | TU Kaiserslautern                              | Germany                                                    |
| Dobbs, Cynnamon                        | Associate professor                           | Universidad mayor                              | Chile                                                      |
| Döbert, Timm                           | Postdoctoral Fellow                           | University of Alberta                          | Canada                                                     |
| Dobler, Ralph                          | Postdoc in Evolution and Ecology              | TU Dresden                                     | Germany                                                    |
| Dobrijevic, Michel                     | Researcher/teacher                            | Laboratoire d'Astrophysique de Bordeaux        | France                                                     |
| Dobrovol'ski, Ricardo                  | Professor of Ecology and Conservation         | Universidade Federal da Bahia                  | Brazil                                                     |
| Dobson, Andy                           | Professor                                     | Princeton University                           | United States of America (the)                             |
| Docherty, Teegan                       |                                               | Durham University                              | United Kingdom of Great Britain and Northern Ireland (the) |
| Docquier, David                        | Postdoc researcher                            | UCLouvain                                      | Belgium                                                    |
| Doda, Tomy                             | PhD student, Environmental Sciences           | Eawag                                          | Switzerland                                                |
| Dodd, Jennifer                         | Lecturer - Ecology & conservation             | Edinburgh Napier University                    | United Kingdom of Great Britain and Northern Ireland (the) |
| Dode, Coralie                          | Hydrogeology                                  |                                                | France                                                     |
| Dodkin, Christina                      | Research Director/Ethologist                  | Animal Defenders International                 | United Kingdom of Great Britain and Northern Ireland (the) |
| Dodson, Jenna                          | Associate Researcher                          | University of Gothenburg                       | Sweden                                                     |
| Doelsch, Emmanuel                      | Researcher - Environmental Science            | CIRAD                                          | France                                                     |
| Doering-Arjes, Peer                    | Biologist                                     |                                                | Germany                                                    |
| Doherty, John                          | PhD student, Earth Sciences                   | The University of Hong Kong                    | Hong Kong                                                  |
| Doherty, Rachel                        | Senior Researcher                             | Leiden Institute of Physics, Leiden University | Netherlands (the)                                          |
| Doherty, Tim                           | Research Fellow                               | Deakin University                              | Australia                                                  |
| Dohet, Loïc                            | PhD, Ecology                                  | Université Libre de Bruxelles                  | Belgium                                                    |
| Dohrmann, Martin                       | Postdoctoral Researcher/Evolutionary Biology  | Ludwig-Maximilians-Universität München         | Germany                                                    |
| Doi, Hideyuki                          | Associate Professor                           | University of Hyogo                            | Japan                                                      |
| Dolak, Lukas                           | Researcher, Historical climatology            |                                                | Czech Republic (the)                                       |
| Dolce, Luciano                         | Postdoctoral Fellow in Structural Biology     | EMBL                                           | France                                                     |

|                          |                                                |                                                                                                                    |                                |
|--------------------------|------------------------------------------------|--------------------------------------------------------------------------------------------------------------------|--------------------------------|
| Dolder, Mary Anne Heidi  | Collaborating Professor                        | Biology Institute, State university of Campinas                                                                    | Brazil                         |
| Dole, Dr Shrikar         | Founder & CEO                                  | SDG Foundation                                                                                                     | India                          |
| Dolf, Matt               | Director, UBC Wellbeing                        | University of British Columbia                                                                                     | Canada                         |
| Doligalska, Maria        |                                                | University of Warsaw                                                                                               | Poland                         |
| DOLIGEZ, Blandine        | Researcher in Evolutionary Ecology             | CNRS                                                                                                               | France                         |
| Domanski, Dominik        | Ph.D. / Biochemistry                           | Institute of Biochemistry & Biophysics                                                                             | Poland                         |
| Domergue, Frédéric       | Plant Biology Reseracher                       | CNRS                                                                                                               | France                         |
| Domi, Alba               | PhD in astroparticle                           | University of Genova, INFN-Genova, CPPM-Marseille                                                                  | Italy                          |
| Domingo, Esteban         | Professor of Virology                          | Spanish Reserach Council                                                                                           | Spain                          |
| Domingues, Tomas         |                                                | University of São Paulo                                                                                            | Brazil                         |
| Dominguez, Eduardo       | Researcher and Professor                       | Instituto de Biodiversidad Neotropical CONICET and Facultad de Ciencias Naturales, Universidad Nacional de Tucuman | Argentina                      |
| Dominguez, Cesar         | Professor                                      | Instituto de Ecología, Universidad Nacional autónoma de México                                                     | Mexico                         |
| Dominguez, Cesar A.      | Full Professor                                 | Institute of Ecology, UNAM                                                                                         | Mexico                         |
| Domínguez, Marta         | MSc in Marine Biological Resources             | University of Ghent                                                                                                | Belgium                        |
| Domínguez, Yoannis       | Professor, Botany                              | São Paulo State Univesity - UNESP                                                                                  | Brazil                         |
| Domínguez, Jorge         | Professor of Zoology                           | Universidade de Vigo                                                                                               | Spain                          |
| DOMMANGET, Fanny         | Researcher in plant invasions                  | IRSTEA                                                                                                             | France                         |
| Doña, Jorge              | PhD                                            | University of Illinois at Urbana-Champaign                                                                         | United States of America (the) |
| Doña Monzo, Carolina     | Postdoctoral researcher                        | University of València                                                                                             | Spain                          |
| Donadio-Andrei, Sandrine | Doctor in Biotech                              |                                                                                                                    | France                         |
| Donald, Julian           | Postdoctoral Researcher                        | Université Toulouse 3 Paul Sabatier                                                                                | France                         |
| Donald, Kirsten          | Research Fellow, Evolutionary Biology          | University of Otago                                                                                                | New Zealand                    |
| DoNascimento, Carlos     | Researcher and curator of the Fish Collection  | Instituto de Investigación de Recursos Biológicos Alexander von Humboldt                                           | Colombia                       |
| Donati, Elisa            | Master's student in ecological science         | University of Parma                                                                                                | Italy                          |
| Donazar, Jose Antonio    | Research Professor                             | Spanish Council for Reseech (CSIC)                                                                                 | Spain                          |
| Done, Terry              | Associate Fellow                               | Australian Institute of Marine Science                                                                             | Australia                      |
| Dongre, Pooja            | PhD Student                                    | University of Lausanne                                                                                             | Switzerland                    |
| Donley, Nathan           | senior scientist                               | center for biological diversity                                                                                    | United States of America (the) |
| Donner, Helena           | PhD candidate, Biology                         | Wageningen University and Research                                                                                 | Netherlands (the)              |
| Donnici, Sandra          | Researcher                                     | Consiglio Nazionale delle Ricerche                                                                                 | Italy                          |
| Donoso, David A.         | Assistant Professor                            | Escuela Politécnica Nacional                                                                                       | Ecuador                        |
| Donoso, Pablo            | Professor                                      | Universidad Austral de Chile                                                                                       | Chile                          |
| Dool, Serena             | Postdoc                                        | Montpellier                                                                                                        | France                         |
| Doran, Carolina          | Postdoc                                        | Leibniz Institute of Freshwater Ecology & Inland Fisheries                                                         | Germany                        |
| Doré, Thierry            | Agronomist                                     | AgroParisTech                                                                                                      | France                         |
| Dorf, Marcel             | Atmospheric Chemistry and Physics              | Max-Planck Institute for Chemistry                                                                                 | Germany                        |
| Dori, Dov                | Professor, Systems and Information Engineering | MIT and Technion                                                                                                   | Israel                         |

|                                  |                                                        |                                                                                                            |                                                            |
|----------------------------------|--------------------------------------------------------|------------------------------------------------------------------------------------------------------------|------------------------------------------------------------|
| Dori-Hacohen, Shiri              | CEO & Cofounder (Computer Science)                     | AuCoDe                                                                                                     | United States of America (the)                             |
| Doria, Vanessa                   | Bióloga/Docente universitaria                          | Facultad de Ciencias Exactas y Naturales, Universidad Nacional de Asunción                                 | Paraguay                                                   |
| Dorian, Lefebvre                 | Engineer Assistant                                     | CNRS                                                                                                       | France                                                     |
| Dorin, Bruno                     | Senior Researcher (Economics)                          | CIRAD                                                                                                      | France                                                     |
| Dörler, Daniel                   | Senior Scientist, Ecology                              | University of Natural Resources and Life Sciences, Vienna                                                  | Austria                                                    |
| Dormoy-Boulanger, Jade           | Biology, climate change, cyanobacteria                 | UQAM                                                                                                       | Canada                                                     |
| Dornbos Jr., David               | Professor, Plant Physiology                            | Calvin University                                                                                          | United States of America (the)                             |
| Dorner, Fabian                   | Transport research                                     | Technische Universität Wien                                                                                | Austria                                                    |
| Dörrer, Nils                     | B. Sc. Computer Science                                | Georg August University Göttingen                                                                          | Germany                                                    |
| Dorrington, Joshua               | PhD Student in Atmospheric Physics                     | University of Oxford                                                                                       | United Kingdom of Great Britain and Northern Ireland (the) |
| dos Santos, Antonio M.           | Researcher, Neutron scattering                         |                                                                                                            | United States of America (the)                             |
| dos Santos, Alex                 | PhD Oceanography                                       | Laboratoire d'Aérodologie                                                                                  | France                                                     |
| dos Santos, Eva                  | Post-doc in Astroparticle Physics                      | Institute of Physics - Czech Academy of Sciences                                                           | Czech Republic (the)                                       |
| Dos Santos, Iracenir             | Professor                                              | Federal University of Western Para                                                                         | Brazil                                                     |
| Dos Santos, Andre Cordeiro Alves | Associate Professo in Limnology                        | Universidade Federal de São Carlos                                                                         | Brazil                                                     |
| Dössegger, Lukas                 |                                                        | EAWAG                                                                                                      | Switzerland                                                |
| Dossier, Julien                  | Carbon Neutrality Expert                               | Quattrolibri                                                                                               | France                                                     |
| Dostie, Marcus                   | Instructor III Department of Geography and Environment | University of Lethbridge                                                                                   | Canada                                                     |
| Dottori, Marcelo                 | Assistant Progegessor                                  | University of São Paulo                                                                                    | Brazil                                                     |
| Douady, Christophe               | Professor Evolutionary Biology                         | Université de Lyon                                                                                         | France                                                     |
| DOUBLET, Violette                | PhD Student                                            | INRA - French National Institute for Agricultural Research.                                                | France                                                     |
| Doucette, Lisa                   | Resource Scientist (Provincial Biologist)              | Nova Scotia Department of Lands and Forestry, Wildlife Division                                            | Canada                                                     |
| Dougherty, Thomas                | Retired environmental scientist                        |                                                                                                            | Canada                                                     |
| Douglas, Hannah                  | Psychology                                             | Macquarie University                                                                                       | Australia                                                  |
| Doulcier, Guilhem                | Grad Student                                           | École normale supérieure                                                                                   | France                                                     |
| Doumas, Patrick                  | Senior Scientist                                       | INRA                                                                                                       | France                                                     |
| DOUMBIA, Lassina                 | One Health focal point                                 | Laboratory of Applied Molecular Biology                                                                    | Mali                                                       |
| doutrelant, claire               | Evolutionary Biologist                                 | CNRS                                                                                                       | France                                                     |
| Dovciak, Martin                  | Associate Professor in Plant Ecology                   | State University of New York, College of Environmental Science and Forestry (SUNY ESF), Syracuse, New York | United States of America (the)                             |
| Dove, Alistair                   | Vice President of Research & Conservation              | Georgia Aquarium                                                                                           | United States of America (the)                             |
| Dow, Leslie                      | Consultant, Biomedical Devices & Biotechnology         | Leslie Dow Consulting LLC                                                                                  | United States of America (the)                             |
| Dowler, Robert                   | Professor of Biology                                   | Angelo State University                                                                                    | United States of America (the)                             |
| Dowling, Caroline                | PhD Candidate in Plant Genetics                        | University College Dublin                                                                                  | Ireland                                                    |
| Downey, Phillip                  | Mechanical Engineer                                    | Dana Incorporated                                                                                          | United States of America (the)                             |

|                             |                                                          |                                                                                |                                                            |
|-----------------------------|----------------------------------------------------------|--------------------------------------------------------------------------------|------------------------------------------------------------|
| DOWNEY, PHILLIP             | MECHANICAL ENGINEER                                      | DANA CORP                                                                      | United States of America (the)                             |
| Downs, Thomas               | Junior Doctor                                            | Betsi Cadwaladr University Health Board                                        | United Kingdom of Great Britain and Northern Ireland (the) |
| Downs, Colleen              | Professor                                                | University of KwaZulu-Natal                                                    | South Africa                                               |
| Doyle, Tristan              | PhD Student                                              | Lancaster University                                                           | United Kingdom of Great Britain and Northern Ireland (the) |
| Doyle, Paul                 | Hydrotechnical Engineer                                  | BC Rivers Consulting                                                           | Canada                                                     |
| Doyle, Emma                 | Biosciences Research                                     | University of Exeter                                                           | United Kingdom of Great Britain and Northern Ireland (the) |
| Doyle, Allen                | Chemical Oceanography                                    | University of California                                                       | United States of America (the)                             |
| Doyle, Mary Ann             | Retired, Director, Associate Professor Teacher Education | Earth in Common Design, LLC                                                    | United States of America (the)                             |
| Doz, Cyprien                | PhD in Statistics                                        | University Paris Saclay                                                        | France                                                     |
| Dr. Grüttner, Astrid        | Botany                                                   |                                                                                | Germany                                                    |
| Dr. Kant, Roswitha          | Philosopher                                              | Studienseminar für Gymnasien Wiesbaden                                         | Germany                                                    |
| Dr. Mucha, Klaus            | Diplom-Psychologe                                        | FOM Hochschule für Ökonomie und Management, DIPLOMA Hochschule                 | Germany                                                    |
| Dr. Rittmann, Simon         | Senior Scientist/Microbiology                            | Universität Wien                                                               | Austria                                                    |
| Dr. Zippel, Elke            | Curator Dahlem Seed Bank                                 | Botanic Garden and Botanic Museum Berlin                                       | Germany                                                    |
| Dr.med. Stratmann, Matthias | General Practitioner                                     | Hausarztzentrum Werther                                                        | Germany                                                    |
| Dr.Rusche, Jochen           | Chemistry                                                | person of private means                                                        | Germany                                                    |
| Drabik, Pascal              | Scientific Officer                                       |                                                                                | Belgium                                                    |
| Drago, Andrea               | PhD student in Mathematics                               | Rome University "La Sapienza"                                                  | Italy                                                      |
| Drago, Filippo              | Employee                                                 | ISTituto Italiano di Tecnologia                                                | Italy                                                      |
| Drake, David                | Marine Geology                                           | USGS                                                                           | United States of America (the)                             |
| Drake, Donald               | Professor                                                | University of Hawaii                                                           | United States of America (the)                             |
| Drange, Helge               | Professor, Oceanography                                  | University in Bergen                                                           | Norway                                                     |
| Draper, John                | Assistant Professor (Public Administration)              | Khon Kaen University                                                           | Thailand                                                   |
| Draper, Isabel              | Associate Professor of Botany                            | Universidad Autónoma de Madrid                                                 | Spain                                                      |
| Draper, Olga                | Research Safety Specialist; Molecular and Cell Biologist | University of California, Berkeley                                             | United States of America (the)                             |
| Draper, David               | Post Doc Researcher                                      | ce3c - University of Lisbon                                                    | Portugal                                                   |
| Draveng, Flora              | Biologist                                                |                                                                                | Sweden                                                     |
| Dray, Stéphane              | Senior researcher                                        | Laboratoire de Biométrie et Biologie Evolutive, CNRS UMR 5558, Université Lyon | France                                                     |
| Drayton, Brian              | Center Co-Director                                       | TERC                                                                           | United States of America (the)                             |
| Dreber, Niels               | Ecologist                                                | University of Göttingen                                                        | Germany                                                    |
| Drechsel, Emanuel J.        | Professor, Interdisciplinary Studies (retired)           | University of Hawai 'i at Mānoa                                                | United States of America (the)                             |
| Drechsel, Susanne           | Meteorologist                                            | Zentralanstalt für Meteorologie und Geodynamik                                 | Austria                                                    |
| Dreier, Thomas              | Professor                                                | University Duisburg-Essen                                                      | Germany                                                    |
| Dresmann, Horst             | research assistant / geology                             | Applied and Environmental Geology, University of Basel                         | Switzerland                                                |

|                                |                                                       |                                                              |                                                            |
|--------------------------------|-------------------------------------------------------|--------------------------------------------------------------|------------------------------------------------------------|
| Dreujou, Elliot                | PhD candidate in Oceanography                         | Université du Québec à Rimouski                              | Canada                                                     |
| Drevensek, Stephanie           | Biologist                                             | INRA                                                         | France                                                     |
| Drigo, Barbara                 | Lecturer Microbial Ecology                            | University of South Australia                                | Australia                                                  |
| Drijkoningen, Philip           | Geologist                                             | Retired                                                      | Belgium                                                    |
| Drimmel, Ronald                | Research astronomer                                   | INAF                                                         | Italy                                                      |
| Dripps, Weston                 | Professor of Earth and Environmental Sciences         | Furman University                                            | United States of America (the)                             |
| Driscoll, Paul                 | Staff Scientist/Metabolomics                          | The Francis Crick Institute                                  | United Kingdom of Great Britain and Northern Ireland (the) |
| Dror, Hila                     | Phd candidate                                         | University of Haifa                                          | Israel                                                     |
| Drost, Annemieke               | Aquatic ecology                                       | NIOO-KNAW                                                    | Netherlands (the)                                          |
| Droual, Gabin                  | Engineer                                              | IFREMER                                                      | France                                                     |
| Drouet, Emmanuel               | Professor in UGA France, PhD                          | UGA Université Grenoble Alpes                                | France                                                     |
| Drouilly, Romain               | PhD computer science                                  |                                                              | France                                                     |
| Drouilly, Marine               | Wildlife biologist                                    | Institute for Communities and Wildlife in Africa             | South Africa                                               |
| Droujko, Jessica               | Mechanical Engineer                                   | Leibniz-Institute of Freshwater Ecology and Inland Fisheries | Canada                                                     |
| Drozak, Jakub                  | assistant professor, biochemistry                     | Uniwersity of Warsaw                                         | Poland                                                     |
| Drummond, Revel                | Molecular Biology                                     |                                                              | New Zealand                                                |
| Drummond, Alexei               | Professor of Computational Biology                    | University of Auckland                                       | New Zealand                                                |
| Drury, Stephen                 | Security Manager and Exhibit Development Intern       | Florida Museum                                               | United States of America (the)                             |
| Drury, Jonathan                | Assistant Professor                                   | Durham University                                            | United Kingdom of Great Britain and Northern Ireland (the) |
| du Pontavice, Hubert           | Marine Ecology                                        | Agrocampus Ouest                                             | France                                                     |
| du Preez, Derek                | Director of the School of Environmental Sciences      | Nelson Mandela Metropolitan University                       | South Africa                                               |
| Duarte, Liliana                | Researcher                                            | Instituto Politécnico de Coimbra                             | Portugal                                                   |
| Duarte, Ana                    |                                                       | University of Exeter                                         | United Kingdom of Great Britain and Northern Ireland (the) |
| Duarte, Renato                 | Postdoctoral researcher in computational neuroscience | Forchunzentrums Juelich                                      | Germany                                                    |
| Duarte, Bernardo               | Assistant Researcher                                  | MARE - Marine and Environmental Sciences Centre              | Portugal                                                   |
| Duarte de Paula Costa, Micheli | Research Fellow                                       | Deakin University - Blue Carbon Lab                          | Australia                                                  |
| Dubard, Emilie                 | new energies' devices                                 | Centre National de la Recherche Scientifique                 | France                                                     |
| DuBay, Shane                   | Assistant Professor                                   | University of Michigan                                       | United States of America (the)                             |
| Dubois, Gregoire               | Biodiversity Conservation                             | Joint Research Centre of the European Commission             | Italy                                                      |
| Dubois, Jessica                | Researcher                                            | Inserm                                                       | France                                                     |
| DuBois, Christopher            | Restoration Coordinator                               | The Nature Conservancy                                       | United States of America (the)                             |
| Dubos, Nicolas                 | Researcher in Ecology                                 | MNHN                                                         | France                                                     |
| Duca, Charles                  | Professor / Ecology and Conservation Biology          | Universidade Vila Velha                                      | Brazil                                                     |
| Duca, Edward                   | Lecturer in Science and Innovation Communication      | University of Malta                                          | Malta                                                      |
| Duchardt, Courtney             | Rangeland Avian Ecologist                             | University of Wyoming                                        | United States of America (the)                             |
| Ducharne, Agnès                | Hydrologist, senior scientist                         | CNRS, Institut Pierre-Simon Laplace                          | France                                                     |
| Duchatelet, Laurent            | PhD Student                                           | Université catholique de Louvain                             | Belgium                                                    |

|                        |                                                               |                                                                   |                                                            |
|------------------------|---------------------------------------------------------------|-------------------------------------------------------------------|------------------------------------------------------------|
| Duchelle, Amy          | Senior Scientist                                              | Center for International Forestry Research (CIFOR)                | Indonesia                                                  |
| Duchicela, Sisimac     | PhD Candidate/Department of Geography and the Environment     | University of Texas-Austin                                        | United States of America (the)                             |
| Duckworth, J. W.       | Wildlife Surveyor and Conservation Advisor                    | J. W. Duckworth Ltd                                               | United Kingdom of Great Britain and Northern Ireland (the) |
| Duckworth, Chris       | Astrophysics PhD student                                      | St Andrews University, Scotland & Flatiron Institute              | United Kingdom of Great Britain and Northern Ireland (the) |
| Ducotterd, Charlotte   | PhD Student in Life Sciences                                  | University of Lausanne                                            | Switzerland                                                |
| DUCROS, Delphine       | PhD student in ecology and conservation biology               | Muséum National d'Histoire Naturelle (Paris)                      | France                                                     |
| Duda, Matthew          | Paleolimnology                                                | Queen's University                                                | Canada                                                     |
| Dudley, Bernard        | Environmental Chemist                                         | Centre for Ecology and Hydrology                                  | United Kingdom of Great Britain and Northern Ireland (the) |
| Duffaut, Carine        | PhD, Project Manager (Epidemiology and public health)         | Inserm (French National Institute of Health and Medical Research) | France                                                     |
| Duffy, Deanna          | Spatial Scientist                                             | CHarles Sturt University                                          | Australia                                                  |
| Duffy, David           | Gerrit Parmule Wilder Chair in Botany                         | University of Hawaii Manoa                                        | United States of America (the)                             |
| DUFFY, PHILIP          | President and Executive Director                              | Woods Hole Research Center                                        | United States of America (the)                             |
| Duflot, Rémi           | Ecology                                                       | Jyväskylä University, Finland                                     | Finland                                                    |
| DUFLOT, Denis          | Associate Professor, Physics                                  | Université de Lille, Faculté des Sciences et Technologies, PhLAM  | France                                                     |
| Dufour, Javier         | Professor / Chemical and Environmental Engineering            | Rey Juan Carlos University                                        | Spain                                                      |
| Dufour, Pauline Céline | PhD candidate, Climate change biology/conservation physiology | The university of Hong Kong                                       | Hong Kong                                                  |
| Dufour, Pauline        | PhD student in Conservation biology                           | The University of Hong Kong                                       | Hong Kong                                                  |
| Duft, Denis            | Staff Scientist / Atmospheric Science                         | Karlsruhe Institute of Technology                                 | Germany                                                    |
| Dugar, Gaurav          | Postdoc                                                       | University of Amsterdam                                           | Netherlands (the)                                          |
| Duggan, Seána          | Research Associate, Microbiology                              | University of Bristol                                             | United Kingdom of Great Britain and Northern Ireland (the) |
| Dugon, Michel          | Principal Investigator / Zoology                              | National University of Ireland Galway                             | Ireland                                                    |
| Duhaime, Melissa       | Professor, Ecology and Evolutionary Biology                   | University of Michigan                                            | United States of America (the)                             |
| Duinslaeger, Nick      | PHD                                                           | The Catalan Institute for Water Research                          | Spain                                                      |
| Duistermaat, Leni      | Researcher                                                    | Naturalis Biodiversity Center                                     | Netherlands (the)                                          |
| Dülgeroğlu, Canan      | phd student                                                   | Akdeniz University                                                | Turkey                                                     |
| Dullinger, Iwona       | Global Change Ecology                                         | University of Vienna                                              | Austria                                                    |
| DUMAS, Christine       | Associate Professor                                           | University of Strasbourg                                          | France                                                     |
| DUMORTIER, PIERRE      |                                                               | University of Liege                                               | Belgium                                                    |
| Duncan, James          | Director                                                      | Discover Owls                                                     | Canada                                                     |
| Dunham, Amy            | Associate Professor                                           | Rice University                                                   | United States of America (the)                             |
| Dunham, Alistair       | Bioinformatics                                                | EMBL-EBI                                                          | United Kingdom of Great Britain and Northern Ireland (the) |
| Dunker, Susanne        | Working group leader - Imaging Flow Cytometry                 | Helmholtz-Centre for Environmental Research                       | Germany                                                    |
| Dunn, Christopher      | Executive Director                                            | Cornell Botanic Gardens                                           | United States of America (the)                             |

|                       |                                                            |                                                                            |                                                            |
|-----------------------|------------------------------------------------------------|----------------------------------------------------------------------------|------------------------------------------------------------|
| Dunn, Sarah           | Hydrologist                                                | US Geological Survey                                                       | United States of America (the)                             |
| Dünner, Camila        | Veterinarian, Conservation Medicine PhD student            | Andrés Bello University                                                    | Chile                                                      |
| Dunshea, Glenn        | Marie Curie Research Fellow                                | Globe Institute, Universty of Copenhagen                                   | Denmark                                                    |
| Dunwiddie, Peter      | Ecologist                                                  | University of Washington                                                   | United States of America (the)                             |
| Dupas, Stéphane       | Research scientist biology                                 | Institut de recherche pour le développement                                | France                                                     |
| Duperat, Marine       | PhD Student, forest sciences                               | Laval university                                                           | Canada                                                     |
| Duponchel, Sarah      | researcher in virology                                     | Max Planck Institute for Medical research                                  | Germany                                                    |
| Dupont, Etienne       | Nuclear Physics                                            | CSNSM, CNRS and université Paris-Saclay                                    | France                                                     |
| Dupouey, Jean-Luc     | ecology                                                    |                                                                            | France                                                     |
| Dupré, Gabriel        | PhD student                                                | INRA                                                                       | France                                                     |
| Dupressoir, Thierry   | Professor Virology                                         | Ecole Pratique des Hautes Etudes -PSL University (Life and Earth Sciences) | France                                                     |
| Dupuy, Guillaume      | Student in Marine Biology                                  | University of Ghent (UGent)                                                | France                                                     |
| Durall, Daniel        | Associate Professor                                        | UBC Okanagan                                                               | Canada                                                     |
| Duram, Leslie         | Professor, Environmental Geography                         | Southern Illinois University                                               | United States of America (the)                             |
| Duran, Adrien         | PhD student in immunology                                  | University of Bordeaux                                                     | France                                                     |
| Durand, Jean-Baptiste | Researcher in Neurobiology                                 | CNRS                                                                       | France                                                     |
| Durand, John          | Research Scientist, Estuarine Ecology                      | University of California, Davis                                            | United States of America (the)                             |
| Durand, Jacques       | chercheur Neurobiologie                                    | CNRS                                                                       | France                                                     |
| Durbecq, Aure         | phd student in Biology and Ecology                         | IMBE Avignon University                                                    | France                                                     |
| Dures, Simon          | Conservation Ecologist                                     |                                                                            | United Kingdom of Great Britain and Northern Ireland (the) |
| During, Melanie       | Research Assistance in Vertebrate Paleontology             | Uppsala University                                                         | Sweden                                                     |
| Duringer, Jennifer    |                                                            | Oregon State University                                                    | United States of America (the)                             |
| Duron, Olivier        | Evolutionary biologist                                     | CNRS                                                                       | France                                                     |
| Durrant, Alexandra    | PhD Candidate in Neuroscience                              | University of Nottingham                                                   | United Kingdom of Great Britain and Northern Ireland (the) |
| Durrieu, Matthias     | PhD student, Neurosciences                                 | Université Paul Sabatier, Toulouse                                         | France                                                     |
| Dusart, Nicolas       | post-doctoral position                                     | UMR PIAF - INRAe                                                           | France                                                     |
| Dussailant, Alejandro | Associate Professor                                        | Universidad de Aysén                                                       | Chile                                                      |
| Dusseldorp, Gerrit    | Archaeology                                                | Leiden University                                                          | Netherlands (the)                                          |
| Dutoit, Dominique     | AI, deep learning / Phd - authorization to direct research | sensegates                                                                 | France                                                     |
| Dutrillaux, Bernard   | Research director emeritus                                 | Muséum National d'Histoire Naturelle                                       | France                                                     |
| Dutta, Abhishek       | Graduate Student                                           | University of British Columbia                                             | Canada                                                     |
| DUTTON-REGESTER, KATE | WILDLIFE CONSERVATION                                      | THE UNIVERSITY OF QUEENSLAND                                               | Australia                                                  |
| Duvall, Fern          | Native ecosystems Protection and Management                | Hawaii Dept. of Land & Natural resources, Division of Forestry & Wildlife  | United States of America (the)                             |
| Duvallet, Gérard      | Professor Emeritus / Medical Entomology                    | University Paul-Valéry Montpellier 3                                       | France                                                     |
| DUWIG, Céline         | Scientist                                                  | Institut de Recherche pour le Développement                                | France                                                     |
| Dwyer, Catherine      | Professor of Animal Behaviour and Animal Welfare           | SRUC                                                                       | United Kingdom of Great Britain and Northern Ireland (the) |

|                              |                                                                                        |                                                                           |                                                            |
|------------------------------|----------------------------------------------------------------------------------------|---------------------------------------------------------------------------|------------------------------------------------------------|
| Dybzinski, Ray               | Assistant Professor                                                                    | Institute of Environmental Sustainability, Loyola University Chicago      | United States of America (the)                             |
| Dyck, Melaina                | Gruber Fellow in Global Justice (Environmental Science)                                | Yale University                                                           | United States of America (the)                             |
| Dye, Adrian                  | PhD Glaciology and limnology researcher                                                | University of York                                                        | United Kingdom of Great Britain and Northern Ireland (the) |
| Dyer, Lee                    | Professor of Ecology Evolution and Conservation Biology                                | University of Nevada Reno                                                 | United States of America (the)                             |
| Dymackova, Radana            | Physician, PhD. student                                                                | Masaryk Memorial Cancer Institute, Brno, Czech Republic                   | Czech Republic (the)                                       |
| Dyson, Peter                 | Emeritus Professor of Physics                                                          | La Trobe University                                                       | Australia                                                  |
| Dyson, Paul                  | Professor of Molecular Microbiology                                                    | Swansea University, UK                                                    | United Kingdom of Great Britain and Northern Ireland (the) |
| Dzepina, Katja               | Assistant Professor                                                                    | University of Rijeka                                                      | Croatia                                                    |
| Dzerefos, Cathy              | Postdoctoral fellow                                                                    | North West University                                                     | South Africa                                               |
| Dziadek, Ricarda             | Postdoctoral researcher / Geophysics                                                   | Alfred Wegener Institute, Helmholtz Center for Polar and Marine Research  | Germany                                                    |
| Dziewit, Kacper              | PhD Student in Biology                                                                 | University of Warsaw                                                      | Poland                                                     |
| Dzurenko, Marek              | Ecologist                                                                              | Institute of Forest Ecology                                               | Slovakia                                                   |
| E-Vojtkó, Anna               | PhD student in Plant Ecology                                                           | Department of Botany, University of South Bohemia                         | Czech Republic (the)                                       |
| Earl, Julia                  | Assistant Professor                                                                    | Louisiana Tech University                                                 | United States of America (the)                             |
| Easterbrook, Steve           | Director, School of the Environment                                                    | University of Toronto                                                     | Canada                                                     |
| Eastham, Matthew             | Postgraduate researcher - cell and molecular biology                                   | Newcastle University                                                      | United Kingdom of Great Britain and Northern Ireland (the) |
| Eastment, Conon              | Conservation Biology                                                                   | University of Cape Town                                                   | South Africa                                               |
| Eastwood, Gillian            | Assistant Professor (Disease Ecology)                                                  | Virginia Tech University                                                  | United States of America (the)                             |
| Ebenhard, Torbjörn           | Deputy director / Ecologist                                                            | Swedish Biodiversity Centre, Swedish University of Agricultural Sciences  | Sweden                                                     |
| Ebensperger, Luis            | Professor of Biology                                                                   | P. Universidad Católica de Chile                                          | Chile                                                      |
| Ebersole, James              | Professor of Biology                                                                   | Colorado College                                                          | United States of America (the)                             |
| echevaria, joyce             | BA Geography: Urban Development/Environmental Science                                  | Slippery Rock University, Slippery Rock, Pennsylvania                     | United States of America (the)                             |
| Echeverria, Carlos Alejandro | Pos Doctoral researcher                                                                | Federal University of Rio de Janeiro - UFRJ                               | Brazil                                                     |
| Echeverría, Javier           | Professor of Organic Chemistry and Ethnopharmacology, Universidad de Santiago de Chile | Universidad de Santiago de Chile                                          | Chile                                                      |
| Echeverry-Alcendra, Andrea   | Interim Executive Director / Conservation Biologist                                    | Colombian Association of Zoos and Aquariums (ACOPAZOA) / Barranquilla Zoo | Colombia                                                   |
| Echeveste, Pedro             | Assistant professor                                                                    | Universidad de Antofagasta                                                | Chile                                                      |
| Eckartz, Katharina           | Professor of Economics                                                                 | TH Bingen                                                                 | Germany                                                    |
| Eckert, Sandra               | Senior research scientist/remote sensing expert                                        | Centre for Development and Environment, University of Bern                | Switzerland                                                |
| Eckert, Christopher          | Professor of Biology                                                                   | Queen's University                                                        | Canada                                                     |
| Eckmann, Reiner              | Professor Limnology                                                                    | University of Konstanz                                                    | Germany                                                    |

|                           |                                                                                                                |                                                                                  |                                                            |
|---------------------------|----------------------------------------------------------------------------------------------------------------|----------------------------------------------------------------------------------|------------------------------------------------------------|
| Ecoffet, Paul             | PhD Student in Computer Science                                                                                | ISIR, Sorbonne Université, Paris                                                 | France                                                     |
| EDERY, Patrick            | Department co-head, professor / Genetics                                                                       | University Lyon 1                                                                | France                                                     |
| Edoo, Zainab              | PhD student - Microbiology                                                                                     | Sorbonne Université                                                              | France                                                     |
| Edtbauer, Achim           | Postdoc in Atmospheric Chemistry                                                                               |                                                                                  | Germany                                                    |
| Edwards, Taylor           | Associate Staff Scientist / Conservation Genetics                                                              | University of Arizona                                                            | United States of America (the)                             |
| Edwards, David            | Professor of Conservation Science                                                                              | University of Sheffield                                                          | United Kingdom of Great Britain and Northern Ireland (the) |
| Edwards, Bruce            | R&D preventing enormous wildfires by increasing Initial Attack success rate to cut CO2 by hundreds of megatons | Firetech Engineering Inc.                                                        | Canada                                                     |
| Edyvane, Karen            | University Professorial Fellow, environmental science                                                          | Charles Darwin University                                                        | Australia                                                  |
| Eeraerts, Maxime          | PhD                                                                                                            | Universiteit Gent                                                                | Belgium                                                    |
| Eeva, Tapio               | Dr.                                                                                                            | University of Turku                                                              | Finland                                                    |
| Effah, Bernard            | Senior Lecturer (Forestry/Wood Science), PhD                                                                   | Kumasi Technical University                                                      | Ghana                                                      |
| Effenberger, Mathias      | Senior Researcher for Technology Assessment in Agriculture                                                     | Bavarian State Research Center for Agriculture                                   | Germany                                                    |
| Efrat, Ron                | PhD Candidate                                                                                                  | Ben-Gurion University of the Negev                                               | Israel                                                     |
| Egana-Ugrinovic, Daniel   | Postdoctoral Associate                                                                                         | Perimeter Institute                                                              | Canada                                                     |
| Egbert, Matthew           | Senior Lecturer, Interdisciplinary Science                                                                     | University of Auckland                                                           | New Zealand                                                |
| Eggen, Joseph             | Astrophysicist                                                                                                 | University of Maryland / NASA                                                    | United States of America (the)                             |
| Egger, Garry              | Epidemiology                                                                                                   | CHPR                                                                             | Australia                                                  |
| Eggers, Lilian            |                                                                                                                | UFRGS                                                                            | Brazil                                                     |
| Egilsdóttir, Aðalbjörg    | Biologist                                                                                                      |                                                                                  | Iceland                                                    |
| Egli, Lukas               | PhD Student                                                                                                    | Helmholtz Center for Environmental Research - UFZ                                | Germany                                                    |
| Egli, Pascal              | PhD student / glaciology                                                                                       | University of Lausanne                                                           | Switzerland                                                |
| Eguiraun, Harkaitz        | Associate Professor                                                                                            | University of the Basque Country UPV/EHU                                         | Spain                                                      |
| Ehlers Smith, David       | Conservation ecologist                                                                                         | University of KwaZulu-Natal                                                      | South Africa                                               |
| Ehman, Melissa            | Epidemiologist                                                                                                 | University of California, San Francisco / California Department of Public Health | United States of America (the)                             |
| Ehmmler, Hartmut          | Physicist                                                                                                      | Helmholtz-Zentrum für Materialien und Energie GmbH                               | Germany                                                    |
| Ehrenfels, Benedikt       |                                                                                                                | Eawag & ETH Zurich                                                               | Switzerland                                                |
| Ehrenreich, Petra         | Microbiologist                                                                                                 | Georg-August-Universität Göttingen                                               | Germany                                                    |
| EHRHART, Yves             | Enseignant /chercheur, silviculture                                                                            | AgroParisTech - Centre de Nancy                                                  | France                                                     |
| Ehrlich, Anne             | Sr. Research Scientist emerita                                                                                 | Stanford University                                                              | United States of America (the)                             |
| Ehrlich, Paul             | Bing Professor of Population Studies Emeritus                                                                  | Stanford University                                                              | United States of America (the)                             |
| Eibl, Beatriz Irene       | Native Species. Seeds and Plants                                                                               | Forestry School. National University of Misiones                                 | Argentina                                                  |
| Eichhorn, Götz            | PhD / Animal Ecology                                                                                           | Netherlands Institute of Ecology (NIOO-KNAW)                                     | Netherlands (the)                                          |
| Eichner, Gerrit           | Akademischer Oberrat                                                                                           | Mathematical Institute Justus Liebig University Giessen                          | Germany                                                    |
| Eichstaedter, René        | Environmental Physics                                                                                          | Institute of Environmental Physics Heidelberg                                    | Germany                                                    |
| Eidesen, Pernille Bronken | Associate professor in Biology                                                                                 | The UNiversity Centre in Svalbard                                                | Norway                                                     |

|                         |                                                             |                                                                                  |                                                            |
|-------------------------|-------------------------------------------------------------|----------------------------------------------------------------------------------|------------------------------------------------------------|
| Eikelboom, Jasper A.J.  | PhD candidate Quantitative Ecology                          | Wageningen University and Research                                               | Netherlands (the)                                          |
| Eisch, Amelia.          | Professor                                                   | University of Pennsylvania/children' s hospital of Philadelphia                  | United States of America (the)                             |
| Eiseman, Danielle       | Communication                                               | Cornell University                                                               | United States of America (the)                             |
| Eisen, Olaf             | Professor for Glaciology                                    | Alfred Wegener Insitute Helmholtz-Centre for Polar and Marine Research           | Germany                                                    |
| Eisenhauer, Nico        | Professor for Experimental Interaction Ecology              | Leipzig University                                                               | Germany                                                    |
| Eisenring, Michael      | Postdoc/Researcher                                          | University of Wisconsin-Madison                                                  | United States of America (the)                             |
| Eisenstaedt, Jean       | Research director in history of science                     | Paris Observatory                                                                | France                                                     |
| Eisenstein, Lea         | PhD student                                                 | Institute of Meteorology and Climate Research, Karlsruhe Institute of Technology | Germany                                                    |
| Eisner, Rowan           | Landscape ecologist                                         |                                                                                  | United Kingdom of Great Britain and Northern Ireland (the) |
| Ejder, Sema             | Phd student                                                 | Newcastle University                                                             | United Kingdom of Great Britain and Northern Ireland (the) |
| Ejeskär, Katarina       | Professor of biomedicine                                    | University of Skövde                                                             | Sweden                                                     |
| Ekkers, David           | PhD student                                                 | Rijksuniversiteit Groningen                                                      | Netherlands (the)                                          |
| EKOUEVI, Didier Koumavi | Epidemiologist                                              | Université de Lomé                                                               | Togo                                                       |
| Ekrami, Omid            |                                                             | University of Antwerp                                                            | Belgium                                                    |
| Ekrem, Torbjørn         | Professor                                                   | Norwegian University of Science and Technology                                   | Norway                                                     |
| Ekvall, Tomas           | Adjunct Professor, Environmental Systems Analysis           | Chalmers University of Technology                                                | Sweden                                                     |
| El Attar Sofi, Oumayma  | Vet                                                         |                                                                                  | France                                                     |
| El Bizri, Hani          | PhD student                                                 | Manchester Metropolitan University                                               | United Kingdom of Great Britain and Northern Ireland (the) |
| EL KABOURI, JAMAL       | PhD                                                         | university Chouaïb-doukkali, faculty of sciences                                 | Morocco                                                    |
| El mansy, Shimaa        | Mrs                                                         | Suez canal University                                                            | Egypt                                                      |
| EL Mkami, Hassane       | Research Fellow                                             | University of St-Andrews, School of Physics and Astronomy                        | United Kingdom of Great Britain and Northern Ireland (the) |
| El-Hani, Charbel        | Full Professor, History and Philosophy of Biology           | Federal University of Bahia                                                      | Brazil                                                     |
| El-Sayed, Essam         | Senior research consultant in energy and water desalination |                                                                                  | Canada                                                     |
| Elasar, Mia             | Chairwoman                                                  | IMMRAC (Israeli Marine Mammals Research & Assistance Center)                     | Israel                                                     |
| Elbadry, Eman           | PhD Student                                                 | CML Institution, Leiden University                                               | Netherlands (the)                                          |
| Eldemirdash, Jasmin     | Master in Ecology                                           | Ain Shams University                                                             | Egypt                                                      |
| Elder, John             | Professor of Biology                                        | Valdosta State University                                                        | United States of America (the)                             |
| Elders, Philip          | Medical student                                             | Vrije Universiteit Amsterdam                                                     | Netherlands (the)                                          |
| Elez, Katarina          | PhD student in Bioinformatics                               | Freie Universität Berlin                                                         | Germany                                                    |
| Elf, Patrick            | Research Fellow                                             | Middlesex University                                                             | United Kingdom of Great Britain and Northern Ireland (the) |
| Elias, Marianne         | Researcher in evolutionary biology                          | CNRS                                                                             | France                                                     |
| Eliassen, Heather       | Associate Professor of Medicine and Epidemiology            | Harvard University and Brigham and Women's Hospital                              | United States of America (the)                             |

|                                |                                                                   |                                                                                                        |                                                            |
|--------------------------------|-------------------------------------------------------------------|--------------------------------------------------------------------------------------------------------|------------------------------------------------------------|
| Eliasson, Peter                | PhD Ecology                                                       | Botswana International University of Sience and Technology                                             | Botswana                                                   |
| ELIE BERTRAND, MEGAM NGOONKADI | Dr                                                                | University of Dschang                                                                                  | Cameroon                                                   |
| Eliran, Alon                   | Soil Remote Sensing; Urban Sustainability                         | Ariel University; Tel Aviv University; Civil Society                                                   | Israel                                                     |
| Elise, Simon                   | Marine ecology                                                    | UMR ENTROPIE Reunion Island University                                                                 | Réunion                                                    |
| Elliff, Carla                  | Oceanography                                                      | Young Ecosystem Services Specialists (YESS)                                                            | Brazil                                                     |
| Elliott, James                 | Flow cytometry                                                    | MRC LMS                                                                                                | United Kingdom of Great Britain and Northern Ireland (the) |
| Ellis, Lisa                    | Professor of Philosophy and Politics                              | University of Otago                                                                                    | New Zealand                                                |
| Ellis, Katherine               | Research Assistant                                                | Louisiana State University                                                                             | United States of America (the)                             |
| Ellis, Sophia                  | MSc Tropical Marine Biology                                       | University of Essex                                                                                    | United Kingdom of Great Britain and Northern Ireland (the) |
| Elmer, Franziska               | Marine ecology faculty                                            | School for field studies                                                                               | Turks and Caicos Islands (the)                             |
| Elo, Merja                     |                                                                   | University of Jyväskylä                                                                                | Finland                                                    |
| Eloranta, Antti                | PhD, Docent                                                       | University of Jyväskylä                                                                                | Finland                                                    |
| Elosegi, Arturo                | Professor of Ecology                                              | University of the Basque Country                                                                       | Spain                                                      |
| Eloy Alves, Ricardo Jorge      | Postdoctoral Researcher in Microbial Ecology and Biogeochemistry  | Lawrence Berkeley National Laboratory, CA, USA                                                         | United States of America (the)                             |
| Elschot, Kelly                 | Research scientist marsh ecology                                  | Wageningen University Research                                                                         | Netherlands (the)                                          |
| Elsler, Laura                  | PhD candidate                                                     | Stockholm Resilience Centre                                                                            | Sweden                                                     |
| Elsner, Martin                 | Professor of Analytical Chemistry and Water Chemistry             | Technical University of Munich                                                                         | Germany                                                    |
| Elson, Dominic                 | Environmental Economist                                           | Verwill Berdikari                                                                                      | United Kingdom of Great Britain and Northern Ireland (the) |
| Elster, Doris                  | Professor of Science Education                                    | University of Bremen                                                                                   | Germany                                                    |
| Emer, Carine                   | PostDoc Ecology and Conservation                                  | São Paulo State University                                                                             | Brazil                                                     |
| Emerick, John                  | Professor Emeritus                                                | Colorado School of Mines                                                                               | United States of America (the)                             |
| Emery, Kitty                   | Associate Curator, Natural History (Archaeology)                  | Florida Museum of Natural History, University of Florida                                               | United States of America (the)                             |
| Emery, Helena                  | PhD Student Bioscience                                            | Swansea University                                                                                     | United Kingdom of Great Britain and Northern Ireland (the) |
| Emery, Alan                    | PhD Marine Sciences 1967                                          | Canadian Museum of Nature (1983-1996) KIVU Nature Inc. (to Present)                                    | Canada                                                     |
| EMERY, Nicolas                 | CNRS researcher                                                   | Institut de Chimie et Matériaux Paris-Est                                                              | France                                                     |
| Emiya, Valentin                | Assistant Professor in Computer Science                           | Aix-Marseille University                                                                               | France                                                     |
| Emmanuel, Jorge                | Adjunct Professor, Institute of Environmental and Marine Sciences | Silliman University                                                                                    | Philippines (the)                                          |
| Emmerich, Daniel               | Professor and PhD in biology                                      | Instituto de Biodiversidad Neotropical (Tucumán) and Escuela Normal Superior D. V. Sarsfield (Córdoba) | Argentina                                                  |
| Emr, Scott                     | Professor of Molecular Biology and Genetics                       | Cornell University                                                                                     | United States of America (the)                             |
| Enbert, Ursula                 | Snow Scientist                                                    |                                                                                                        | Austria                                                    |
| Encarnação, Telma              | PhD researcher                                                    | University of Coimbra                                                                                  | Portugal                                                   |

|                                      |                                                              |                                                                |                                                            |
|--------------------------------------|--------------------------------------------------------------|----------------------------------------------------------------|------------------------------------------------------------|
| Encarnação, João                     | PhD Student on Non-native marine species                     | CCMAR, University of Algarve                                   | Portugal                                                   |
| Encarnação, Cláudia                  |                                                              | University of Évora                                            | Portugal                                                   |
| Endo, Whaldener                      | Professor                                                    | Universidade Federal de Roraima                                | Brazil                                                     |
| Endress, Peter K.                    | Professor Emeritus, Botany                                   | University of Zurich                                           | Switzerland                                                |
| Endsley, K. Arthur                   | Postdoctoral Researcher, Terrestrial Carbon Management       | University of Montana                                          | United States of America (the)                             |
| engel, julien                        | Engineer                                                     | French National Research Institute for Sustainable Development | France                                                     |
| Engel, Philipp                       | Professor of Microbiology                                    | University of Lausanne                                         | Switzerland                                                |
| Engel, Vera Lex                      | Associate Professor/Restoration Ecology                      | São Paulo State University - UNESP                             | Brazil                                                     |
| Engel, Jennifer                      | Pneumology                                                   | Ambulatory                                                     | Germany                                                    |
| Engelbrecht, Bettina                 | Professor, Plant Ecology                                     | Bayreuth University                                            | Germany                                                    |
| Engelbrecht, Hubert                  | Dr. rer. nat.                                                | Geologist and Environmentalist                                 | Germany                                                    |
| Engelhardt, Hermann                  | Glaciologist                                                 | Caltech                                                        | United States of America (the)                             |
| Engelhardt, Dr. Antje                | Reader (Assoc. Prof.) in Primate Behaviour and Conservation  | Liverpool John Moores University                               | United Kingdom of Great Britain and Northern Ireland (the) |
| Engelhardt, Yuri                     | assistant professor                                          | University of Twente                                           | Netherlands (the)                                          |
| Engelman, Catherine                  | PhD candidate                                                | Oregon State University                                        | United States of America (the)                             |
| Engelmann, Rolf A.                   | PhD student and Research Technician in Biodiversity Research | German Centre for Integrative Biodiversity Research (iDiv)     | Germany                                                    |
| Engelstaedter, Sebastian             | Climate Research Analysis Scientist                          | University of Oxford                                           | United Kingdom of Great Britain and Northern Ireland (the) |
| Engert, Jayden                       | Spatial Ecology                                              | James Cook University                                          | Australia                                                  |
| Engl, Tobias                         | Assistant professor                                          | Johannes Gutenberg-University Mainz, Evolutionary Ecology      | Germany                                                    |
| England, Laura                       | Senior Lecturer, Dept. of Sustainable Development            | Appalachian State University                                   | United States of America (the)                             |
| Engler, Simon                        | Scientific Programmer                                        | University of Hawaii                                           | United States of America (the)                             |
| English, Holly                       | PhD Student, Biology and Environmental Science               | University College Dublin                                      | Ireland                                                    |
| Engström, Linda                      | PhD in Rural Development                                     | Swedish University of Agricultural Sciences                    | Sweden                                                     |
| Enklaar, Floor                       | Msc International land and water management                  | Wageningen UR                                                  | Netherlands (the)                                          |
| Ennes Silva, Felipe                  | PhD Student - Wildlife Conservation                          | Mamiraua Institute for Sustainable Development                 | Brazil                                                     |
| Ennos, Richard                       | Professor of Ecological Genetics                             | University of Edinburgh                                        | United Kingdom of Great Britain and Northern Ireland (the) |
| Enqvist, Johan                       | Postdoctoral researcher, Sustainability Science              | University of Cape Town                                        | South Africa                                               |
| Enrech-Xena, Claudia                 | Urban sustainability - pedagogy                              | L'atelier - Education for sustainable action                   | France                                                     |
| Enríquez Magaña, Azucena Guillermina | Master in behavior science                                   | Universidad de Guadalajara                                     | Mexico                                                     |
| Enriquez-de-Salamanca, Alvaro        | Assistant professor                                          | Universidad Complutense de Madrid                              | Spain                                                      |
| Ens, Bruno                           | Coastal ecology                                              | Sovon Dutch Centre for Field Ornithology                       | Netherlands (the)                                          |
| Epperly Chester, Sheryan             | Marine Sciences                                              | retired from NOAA, National Marine Fisheries Service           | United States of America (the)                             |
| Epron, Daniel                        | Professor                                                    | Université de Lorraine                                         | France                                                     |
| EPRON, Daniel                        | Professor                                                    | Kyoto University                                               | Japan                                                      |

|                             |                                                                     |                                                                                    |                                                            |
|-----------------------------|---------------------------------------------------------------------|------------------------------------------------------------------------------------|------------------------------------------------------------|
| Erba, Stefania              | Researcher/Hydrobiologist-Ecologist                                 | CNR-IRSA                                                                           | Italy                                                      |
| Erda, Fikirte               | Large carnivore ecologist                                           | Oklahoma State University                                                          | United States of America (the)                             |
| Erdem, Zeynep               | postdoctoral researcher                                             | NIOZ                                                                               | Netherlands (the)                                          |
| Erdős, Laszlo               | ecologist                                                           | Hungarian Academy of Sciences                                                      | Hungary                                                    |
| Erdozain, Maitane           | Postdoctoral fellow on stream ecology                               | University of New Brunswick                                                        | Spain                                                      |
| Erickson, Heather           | Research Ecologist                                                  | Consulting Research Ecology                                                        | United States of America (the)                             |
| Erickson, Jon               | Blittersdorf Professor of Sustainability Science and Policy         | University of Vermont                                                              | United States of America (the)                             |
| Eriksdon, Eva               | Associate professor (former)                                        | Department of environmental engineering                                            | Denmark                                                    |
| Eriksen, Ane                | Associate Professor, wildlife biology                               | Inland Norway University of Applied Sciences                                       | Norway                                                     |
| Eriksson, Ann               | Biology                                                             |                                                                                    | Canada                                                     |
| Eriksson, Maertha           | PhD student in functional zoo morphology/Biology                    | Stockholm University                                                               | Sweden                                                     |
| Eriksson, Mats              | Project assistant - Environmental archaeology                       | Umeå university                                                                    | Sweden                                                     |
| Eriksson, Ola               | Professor in environmental engineering                              | University of Gävle                                                                | Sweden                                                     |
| Eriksson, K. Martin         | PhD and Network Manager of SDSN Northern Europe                     | Gothenburg Centre for Sustainability                                               | Sweden                                                     |
| Erjavec, Mihela             | Senior lecturer in psychology                                       | Bangor University                                                                  | United Kingdom of Great Britain and Northern Ireland (the) |
| Erkenswick Watsa, Mrinalini | Senior Scientist                                                    | Field Projects International                                                       | United States of America (the)                             |
| Erkosar, Berra              | Researches in ecology and evolution                                 | University of Lausanne                                                             | Switzerland                                                |
| Erlania, Erlania            | PhD Candidate                                                       | Deakin University                                                                  | Australia                                                  |
| Erlwein, Alfredo            | Professor, Faculty of Agrarian Sciences/bioenergy                   | Universidad Austral de Chile                                                       | Chile                                                      |
| Ernest, Holly               | Professor and Excellence Chair, Wildlife Genomics & Disease Ecology | University of Wyoming                                                              | United States of America (the)                             |
| Ernesto, Ortiz              | Postdoctoral fellow                                                 | Universidad Nacional Autónoma de México                                            | Mexico                                                     |
| Erneux, Christophe          | Professor                                                           | Université Libre de Bruxelles                                                      | Belgium                                                    |
| Erning, Katharina           | Dr. rer. nat. / Geology                                             |                                                                                    | Germany                                                    |
| Ernst, Ulrich               | Postdoctoral researcher                                             | University of Münster                                                              | Germany                                                    |
| Ernst, Stefan               |                                                                     | Humbolt University Berlin                                                          | Germany                                                    |
| Eronen, Jussi               | Associate Professor, long-term sustainability science               | University of Helsinki                                                             | Finland                                                    |
| Erős, Tibor                 |                                                                     | MTA Centre for Ecological Research                                                 | Hungary                                                    |
| Eroukhanoff, Fabrice        | Researcher                                                          | University of Oslo                                                                 | Norway                                                     |
| Erridge, Zoe                | Post Harvest Fruit+Vegetable Research Associate                     | Plant and Food Research                                                            | New Zealand                                                |
| Escalante, Patricia         | Investigadora Titular                                               | Instituto de Biología UNAM                                                         | Mexico                                                     |
| Escalona, Moisés            | PhD student                                                         | Pontificia Universidade Católica do Rio Grande do Sul (PUCRS)                      | Venezuela (Bolivarian Republic of)                         |
| Escamilla Rivera, Verénice  | Postdoctoral Scholar                                                | Institute for the Study of Continental Ecosystems in the National Patagonic Center | Argentina                                                  |
| Escandon, Javier            | Investigador en etnografía social                                   | Flacso/ Universidad de Cuenca                                                      | Ecuador                                                    |
| Escaravage, Nathalie        | Assistant professor                                                 | University Toulouse                                                                | France                                                     |
| Escartin, Javier            | Marine Geosciences                                                  | IPGP - CNRS - Université de Paris                                                  | France                                                     |
| Eschenbrenner, Jérôme       | PhD Student, Ecology                                                | iEES Paris                                                                         | France                                                     |

|                             |                                                                                                                                 |                                                       |                                                            |
|-----------------------------|---------------------------------------------------------------------------------------------------------------------------------|-------------------------------------------------------|------------------------------------------------------------|
| Esclarski, Priscilla        | Ornithologist, Master in Ecology, MBA environmental management and sustainable development, PhD academy in Comparative Biology. | Universidade Estadual de Maringá -UEM                 | Brazil                                                     |
| Escobar-Briones, Elva       | Full time Professor/Oceanography                                                                                                | Universidad Nacional Autónoma de México               | Mexico                                                     |
| ESCOBAR-SANDOVAL, Margarita | Research professor, Dendroecology                                                                                               | University of Science and Arts of Chiapas             | Mexico                                                     |
| Escobedo Quevedo, Karla     | PhD student                                                                                                                     | University of Groningen                               | Netherlands (the)                                          |
| Escoubas, Jean-Michel       | Research Scientist                                                                                                              | CNRS                                                  | France                                                     |
| Escriva, Hector             | Research Director                                                                                                               | CNRS                                                  | France                                                     |
| Escurra, Alessandra         | Hydrobiology, fishery and ichthyology                                                                                           | Natural History Museum - UNMSM                        | Peru                                                       |
| Esguícero, André            | Post-doc                                                                                                                        | Universidade de São Paulo                             | Brazil                                                     |
| Eshel, Gidon                | Research Prof., geophysics                                                                                                      | Bard College                                          | United States of America (the)                             |
| Eskew, Evan                 | Research Scientist                                                                                                              | EcoHealth Alliance                                    | United States of America (the)                             |
| Esler, Karen                | Professor and HOD                                                                                                               | Stellenbosch University                               | South Africa                                               |
| Esnouf, Antoine             | Environmental engineer, PhD                                                                                                     | INRA                                                  | France                                                     |
| Espeland, Marianne          | Curator of Lepidoptera                                                                                                          | Zoological Research Museum Alexander Koenig           | Germany                                                    |
| Esperon-Rodriguez, Manuel   | Postdoctoral Researcher                                                                                                         | Western Sydney University                             | Australia                                                  |
| Espindola, Vinicius         | pre-Doc                                                                                                                         | MZUSP                                                 | Brazil                                                     |
| Espinosa, Manuel            | Professor, Biology                                                                                                              | Consejo Superior de Investigaciones Científicas       | Spain                                                      |
| Espinosa, Free              | Senior lecturer/Marine Biology                                                                                                  | University of Seville                                 | Spain                                                      |
| Espinosa, Cayetano          |                                                                                                                                 | Universidad Andres Bello                              | Chile                                                      |
| Espinosa-Cantellano, Martha | Professor                                                                                                                       | Center for Research and Advanced Studies              | Mexico                                                     |
| Espinosa-Duró, Virginia     | Associate professor                                                                                                             | Tecnocampus                                           | Spain                                                      |
| Espinoza, Robert            | Professor of Biology                                                                                                            | California State University, Northridge               | United States of America (the)                             |
| Esser, Helen                | postdoctoral researcher - disease ecology                                                                                       | Wageningen University & Research                      | Netherlands (the)                                          |
| Essl, Franz                 | Ass.-Prof.                                                                                                                      | University Vienna                                     | Austria                                                    |
| Estades, Naina              | Professor                                                                                                                       | Federal University of Paraná                          | Brazil                                                     |
| Estaki, Mehrbod             | Postdoctoral Researcher                                                                                                         | University of California San Diego                    | United States of America (the)                             |
| Estandia, Andrea            | PhD student                                                                                                                     | University of Oxford                                  | United Kingdom of Great Britain and Northern Ireland (the) |
| ESTANDÍA, RUBÉN             | PSICÓLOGO                                                                                                                       | RETIRED                                               | Spain                                                      |
| Estberg, Jerry              | physics Professor emeritus                                                                                                      | University of San Diego                               | United States of America (the)                             |
| Esteban, Jose               | Professor, Neuroscience                                                                                                         | Centro de Biología Molecular Severo Ochoa             | Spain                                                      |
| Estes, Suzanne              | Associate Professor of Biology                                                                                                  | Portland State University                             | United States of America (the)                             |
| Estève, Yannick             | Professor                                                                                                                       | Avignon Université                                    | France                                                     |
| Esteve-Altava, Borja        | Evolutionary Biology                                                                                                            | Pompeu Fabra University                               | Spain                                                      |
| Esteve-Selma, Miguel-Angel  | Professor of Ecology                                                                                                            | Universidad de Murcia                                 | Spain                                                      |
| Esteves, Carolina           | Researcher                                                                                                                      | Instituto Pró-Carnívoros                              | Brazil                                                     |
| Esteves, Ivânia             | Nematology researcher                                                                                                           | Centre for Functional Ecology - University of Coimbra | Portugal                                                   |
| Estévez, Edurne             |                                                                                                                                 | University of Cantabria                               | Spain                                                      |
| Estoup, Arnaud              | Director of research                                                                                                            | Institut National de la Recherche Agronomique         | France                                                     |

|                                     |                                                                   |                                                                    |                                                            |
|-------------------------------------|-------------------------------------------------------------------|--------------------------------------------------------------------|------------------------------------------------------------|
| Estrada, Alejandro                  | senior research scientist                                         | Institute of Biology, National autonomous University of Mexico     | Mexico                                                     |
| Estrada, Francisco                  | Researcher                                                        | Universidad Nacional Autónoma de México                            | Mexico                                                     |
| Estrada Piedrahita, Kelly Alexandra | Masters student in Bioremediation                                 | Queen's University                                                 | Canada                                                     |
| Estrada-Peña, Agustín               | Full Professor of Zoonoses                                        | University of Zaragoza                                             | Spain                                                      |
| Etcheverry, Angela Virginia         | Professor of Botany                                               | Universidad Nacional de Salta                                      | Argentina                                                  |
| Eterovick, Paula                    | Associate Professor                                               | Pontificia Universidade Católica de Minas Gerais                   | Brazil                                                     |
| Etienne, Jocelyn                    | CNRS researcher in biophysics                                     | Univ Grenoble Alpes                                                | France                                                     |
| Etienne, Lucas                      | Ecology                                                           |                                                                    | France                                                     |
| Etienne, Lucie                      | Researcher                                                        | CNRS                                                               | France                                                     |
| Etkind, Simon                       | Physician                                                         |                                                                    | United Kingdom of Great Britain and Northern Ireland (the) |
| Etter, Simon                        | PhD Student in Hydrology                                          | University of Zurich, Department of Geography                      | Switzerland                                                |
| Etxebeste, Iñaki                    | Forest Ecology Researcher                                         | Errez Koop. Elk. Txikia                                            | Spain                                                      |
| Eva, Hugh                           | Senior Scientist                                                  | Joint Rearch Centre                                                | Italy                                                      |
| Evangelista, Charlotte              | Postdoctoral researcher                                           | Centre for Ecological and Evolutionary Synthesis                   | Norway                                                     |
| Evanno, Guillaume                   | Researcher in Ecology and evolutionary biology                    | INRA                                                               | France                                                     |
| Evans, John                         | Professor in Plant Sciences                                       | Australian National University                                     | Australia                                                  |
| Evans, Alina                        | Associate Professor                                               | Inland Norway University of Applied Sciences                       | Norway                                                     |
| Evans, Elaine                       | Extension Professor                                               | University of Minnesota                                            | United States of America (the)                             |
| Evans, Julian                       | Lecturer                                                          | University of Malta                                                | Malta                                                      |
| Evans, Timothy                      | Professor of Biology (Botany)                                     | Grand Valley State University                                      | United States of America (the)                             |
| Evans, Rhian                        | Research Scientist / marine ecology                               | Institute for Marine and Antarctic Studies, University of Tasmania | Australia                                                  |
| Evanylo, Gregory                    | Professor, Environmental Soil Science                             | Virginia Tech                                                      | United States of America (the)                             |
| Even, Catherine                     | associate professor in physics                                    | Université Paris Sud                                               | France                                                     |
| Evensen, Carl                       | Extension Specialist/ Natural Resource & Environmental Management | University of Hawaii at Manoa                                      | United States of America (the)                             |
| Evenson, William                    | Physics, Retired                                                  | Brigham Young University, Utah Valley University                   | United States of America (the)                             |
| Everatt, Kristoffer                 | Carnivore ecologist                                               | Panthera/Nelson Mandela University                                 | Canada                                                     |
| Eviner, Valerie                     | Professor                                                         | University of California, Davis                                    | United States of America (the)                             |
| Ewens, Sophia                       | Doctoral Candidate of Environmental Microbiology                  | University of California, Berkeley                                 | United States of America (the)                             |
| Ewert, Megan                        | GIS Office (Humanitarian Aid)                                     |                                                                    | Estonia                                                    |
| Ewins, Pete                         | Lead Species Conservation Specialist                              | WWF-Canada                                                         | Canada                                                     |
| Exposito-Alonso, Moises             | Principal Investigator and Assistant Professor in Biology         | Carnegie Institution for Science and Stanford University           | United States of America (the)                             |
| Eyers, David                        | Computer Science                                                  | University of Otago                                                | New Zealand                                                |
| Eyraud, Remi                        | Associate Prfessor                                                | Aix-Marseille University                                           | France                                                     |
| Eyre, Victoria                      | Research Associate                                                | Plant and Food Research ltd                                        | New Zealand                                                |
| Ezanno, Pauline                     | Senior researcher in epidemiological modelling                    | BIOEPAR, INRA, Oniris                                              | France                                                     |
| Ezcurra, Paula                      | Staff Research Associate                                          | Scripps Institution of Oceanography                                | United States of America (the)                             |

|                                  |                                                                     |                                                        |                                                            |
|----------------------------------|---------------------------------------------------------------------|--------------------------------------------------------|------------------------------------------------------------|
| Ezenwa, Ifeanyi                  | Assistant Lecturer, Department of Zoology and Environmental Biology | University of Nigeria Nsukka                           | Nigeria                                                    |
| Ezzedine, Khaled                 | Professor of Dermatology                                            | University Paris Est Créteil                           | France                                                     |
| F. De-Miguel, Francisco          | Professor of Neuroscience                                           | Universidad Nacional Autónoma de Mexico                | Mexico                                                     |
| F.O. Miranda, Vitor              | Professor/ Scientist                                                | UNESP - São Paulo State University                     | Brazil                                                     |
| Fabeiro, Concepcion              | Teacher and resercher in Agricultural engineering                   | Castilla-La Mancha University                          | Spain                                                      |
| Fabiani, Ginevra                 | PhD student                                                         | LIST - Luxembourg Institute for Science and Technology | Luxembourg                                                 |
| Fabre, Adrien                    | Economist                                                           | Paris School of Economics                              | France                                                     |
| Fabrice, Vavre                   | Researcher in Evolutionary Biology                                  | CNRS - Lyon                                            | France                                                     |
| Fabricao Neto, Ailton            | Researcher                                                          | UFES                                                   | Brazil                                                     |
| Fabricius, Michelle              | Biologist                                                           | University of Malta                                    | Malta                                                      |
| Fabricius, Katharina             | Senior Principal Research Scientist                                 | AIMS                                                   | Australia                                                  |
| Facchinetti-Mannone, Valerie     | Assistant Professor - Geography                                     | University of Burgundy                                 | France                                                     |
| Facon, Benoit                    | Researcher / Evolutionary Biology                                   | INRA                                                   | France                                                     |
| Fadini, Rodrigo                  | Associate Professor                                                 | Universidade Federal do Oeste do Para                  | Brazil                                                     |
| Fadrique, Belen                  | Ecology                                                             | University of Miami                                    | United States of America (the)                             |
| Faedi, Francesca                 | Researcher in astrophysics                                          | INAF Italy                                             | Italy                                                      |
| Faergeman, Ole                   | Emeritus Professor of Preventive Cardiology                         | Aarhus University                                      | Denmark                                                    |
| Fahey, Babette                   | Biological Anthropology                                             | Harvard University                                     | Australia                                                  |
| Fahrni, Laurence                 | Postdoctoral research associate (Offshore Renewable Energy)         | University of Exeter                                   | United Kingdom of Great Britain and Northern Ireland (the) |
| Faïn, Xavier                     | Research scientist / Paleoclimatology                               | CNRS                                                   | France                                                     |
| Fairhead, Laurent                | Research Engineer / Climatology                                     | LMD/IPSL/CNRS                                          | France                                                     |
| Fairhurst, PhD, RPF, Dr. Kenneth | Visual Landscape Specialist - Planning and Impacts Assessment       | RDI Resource Design Inc                                | Canada                                                     |
| Fais, Maria                      | Biologist and PhD Candidate                                         |                                                        | Italy                                                      |
| Fais, Maria                      | PhD student in Marine Molecular Ecology                             | University of Minho                                    | Portugal                                                   |
| Faivre, Bruno                    | Prof. Ecology                                                       | Université de Bourgogne                                | France                                                     |
| Fajardo-Gutiérrez, Francisco     | Principal Investigator Flora of Bogota, Biologist                   | Jardín Botánico de Bogotá José Celestino Mutis         | Colombia                                                   |
| Fajgenblat, Maxime               | PhD Researcher                                                      | KU Leuven                                              | Belgium                                                    |
| Falanruw, Margie                 | biologist                                                           | Yap Institute of Natural Science                       | Micronesia (Federated States of)                           |
| Falcini, Francesca               | PhD researcher                                                      | University of York                                     | United Kingdom of Great Britain and Northern Ireland (the) |
| Falk, Ulrike                     | Climate Research                                                    | German Weather Service (DWD)                           | Germany                                                    |
| Falk, Don                        | Professor                                                           | University of Arizona                                  | United States of America (the)                             |
| Fall, Andrew                     | Adjunct Professor, Resource and Environmental Management            | Simon Fraser University                                | Canada                                                     |
| Faller, Mathias                  | Geologie                                                            | geowindow PH Freiburg                                  | Germany                                                    |
| Falótico, Tiago                  | Biologist                                                           | University of São Paulo                                | Brazil                                                     |
| Falster, Daniel                  | Senior lecturer, ARC Future Fellow                                  | University of New South Wales                          | Australia                                                  |
| Fanelli, Francesca               | Researcher                                                          | National Council of Research                           | Italy                                                      |

|                            |                                                                   |                                                                  |                                                            |
|----------------------------|-------------------------------------------------------------------|------------------------------------------------------------------|------------------------------------------------------------|
| Fankhauser, Christian      | Professor, Biology                                                | University of Lausanne                                           | Switzerland                                                |
| Fantini, Márcia C A        | Ful Professor/Physics                                             | Physics Institute-University of Sao Paulo                        | Brazil                                                     |
| Faragó, Tibor              | hon. professor (geography, environment)                           | St. Istvan University (Hungary)                                  | Hungary                                                    |
| Farahpour, Farnoush        | postdoctoral researcher                                           | University of Duisburg-Essen                                     | Germany                                                    |
| Faraut, Lauriane           | PhD in biology                                                    | German Primate Center                                            | Germany                                                    |
| Färber Lorda, Jaime        | Senior Scientist, Marine Ecology.                                 | CICESE                                                           | Mexico                                                     |
| Fares, Silvano             | Senior Researcher                                                 | Council for Agricultural Research and Economics                  | Italy                                                      |
| Fárez Román, Valeria       | Ecohydrologist - Assistant Professor                              | Universidad Nacional de Educación                                | Ecuador                                                    |
| Fargeon, Hélène            | PhD student in Forestry                                           | INRA                                                             | France                                                     |
| faria, deborah             | Full Professor                                                    | Universidade Estadual de Santa Cruz                              | Brazil                                                     |
| Farina, DANIELA            | Lab Manager                                                       | University of Exeter                                             | United Kingdom of Great Britain and Northern Ireland (the) |
| FARINACCIO, MARIA          | PROFESSOR/ BOTANY                                                 | Federal University of Mato Grosso do Sul                         | Brazil                                                     |
| Farinotti, Daniel          | Group leader, Glaciology                                          | VAW - ETH Zurich and WSL Birmensdorf                             | Switzerland                                                |
| Farjalla, Vinicius         | Associate Professor / Ecology                                     | Universidade Federal do Rio de Janeiro                           | Brazil                                                     |
| Farmer, Ben                | Waterfront Assistant                                              | School for Field Studies                                         | Turks and Caicos Islands (the)                             |
| Farmer, James              | Associate Professor- Human Ecology                                | Indiana University                                               | United States of America (the)                             |
| Faro, Jose                 | Associate Professor                                               | University of Vigo                                               | Spain                                                      |
| Faroni-Perez, Larisse      | Postdoctoral Researcher                                           | Federal University of Juiz de Fora                               | Brazil                                                     |
| Farrell, Tina              | Astronomy                                                         | Swinburne University                                             | United States of America (the)                             |
| Farrow, Luke               | Higher Scientific Officer/Post Doc in environmental water quality | Agri-Food and Bioscience Institute                               | United Kingdom of Great Britain and Northern Ireland (the) |
| Farrugia Drakard, Veronica | PhD Student, Marine Biology                                       | University College Dublin                                        | Ireland                                                    |
| Faryuni, Irfana Diah       | PhD Student in Earth and Life Institute                           | UC Louvain                                                       | Belgium                                                    |
| Fastré, Constance          | PhD student                                                       | University of Antwerp                                            | Belgium                                                    |
| Fateman, Richard           | Professor Emeritus, Computer Science                              | University of California, Berkeley                               | United States of America (the)                             |
| Fatima, Zuasti             | veterinarian                                                      |                                                                  | Uruguay                                                    |
| Faucherre, Samuel          | PhD, Arctic permafrost                                            | CENPERM - University of Copenhagen                               | Denmark                                                    |
| Fauci, Lisa                | Professor of Mathematics                                          | Tulane University                                                | United States of America (the)                             |
| Faucon, Michel-Pierre      | Professor and Vice Dean Research                                  | UniLaSalle                                                       | France                                                     |
| Fauconnet, Laurence        | Marine ecology and fisheries                                      | IMAR - University of Azores                                      | Portugal                                                   |
| Faudry, Eric               | Microbiology and biochemistry scientist                           |                                                                  | France                                                     |
| Faugeron, Sylvain          | Professor / evolutionary ecology of seaweeds                      | Pontificia Universidad Catolica de Chile                         | Chile                                                      |
| Faura, Georgina            | Post doctoral analytical chemist.                                 | University of Udine                                              | Italy                                                      |
| Faure, Chrystel            |                                                                   | Institute of Chemistry and Biology of membranes and Nano-objects | France                                                     |
| Fauré, Adrien              | Assistant profesor, bioinformatics                                | Yamaguchi university                                             | Japan                                                      |
| Faustino, Augusto          | Full Professor Veterinary Pathology                               | Biomedical Sciences Institute Abel Salazar - Univeristy of Porto | Portugal                                                   |
| Faustino de Lima, Ricardo  | Postdoc researcher - Ecology                                      | Lisbon University                                                | Portugal                                                   |
| Faustino-Fuster, Dario R.  | Ichthyologist                                                     | Museo de Historia Natural - UNMSM (MUSM)                         | Peru                                                       |

|                        |                                                                |                                                                                        |                                                            |
|------------------------|----------------------------------------------------------------|----------------------------------------------------------------------------------------|------------------------------------------------------------|
| Fausto-Sterling, Anne  | Professor Emerita Molecular Biology                            | Brown University                                                                       | United States of America (the)                             |
| Fauvarque, Olivier     | Post doc in Physics                                            | Laboratoire d'Astrophysique de Marseille                                               | France                                                     |
| Favaro, Brett          | Research Scientist                                             | Memorial University of Newfoundland                                                    | Canada                                                     |
| Favier, Lionel         | Postdoctoral researcher - Glaciology                           | Institut des Géosciences de l'Environnement (Grenoble - France)                        | France                                                     |
| Favot, Elizabeth       | PhD Candidate, Paleolimnology                                  | Queen's University                                                                     | Canada                                                     |
| Favre, Anne-Catherine  | Professor                                                      | Grenoble Institute of Engineering                                                      | France                                                     |
| Favre, Cecile          | Junior Research Chairholder / Astrophysics                     | IPAG/UGA                                                                               | France                                                     |
| Fawcett, Anne          | Veterinarian                                                   | University Of Sydney - School Of Veterinary Science                                    | Australia                                                  |
| Fazi, Stefano          | Researcher                                                     | Water Research Institute, National Research Council of Italy (IRSA-CNR)                | Italy                                                      |
| fazzi, paola           | wildlife biologist                                             |                                                                                        | Italy                                                      |
| Fea, Nyree             | Research Fellow / Ecology                                      | Victoria University of Wellington                                                      | New Zealand                                                |
| Feather, Jackie        | Doctor of Clinical Psychology/Senior Lecturer                  | Auckland University of Technology                                                      | New Zealand                                                |
| Fedriani, Jose         |                                                                | CSIC, Center for Desertification Research                                              | Spain                                                      |
| Feeley, Kenneth        | Associate Professor of Biology, Smathers Chair of Tree Biology | University of Miami                                                                    | United States of America (the)                             |
| Feeney, Ann            | Professor Emeritus, Molecular biology                          | Scripps Research Institute                                                             | United States of America (the)                             |
| Fehér, Zoltán          | Senior Curator / Zoology                                       | Hungarian Natural History Museum                                                       | Hungary                                                    |
| Fehrenbacher, Jennifer | Assistant Professor                                            | Oregon State University                                                                | United States of America (the)                             |
| Feit, Ben              | Terrestrial Ecologist                                          | Swedish University of Agricultural Sciences                                            | Sweden                                                     |
| Feitosa, Leonardo      |                                                                | Universidade Federal de Pernambuco                                                     | Brazil                                                     |
| Felcis, Elgars         | Researcher                                                     | University of Latvia                                                                   | Latvia                                                     |
| Feldhaar, Heike        | Prof. Dr.                                                      | University of Bayreuth                                                                 | Germany                                                    |
| Feldman, Tracy         | Assistant Professor of Biology                                 | St. Andrews University—a branch of Webber International University                     | United States of America (the)                             |
| Feldmann, Eike         | Forest Ecology                                                 | University of Geottingen                                                               | Germany                                                    |
| Feldmeyer, Barbara     | PostDoc                                                        | Dr.                                                                                    | Germany                                                    |
| Feldpausch, Ted        | Associate Professor                                            | University of Exeter                                                                   | United Kingdom of Great Britain and Northern Ireland (the) |
| Felgueiras, Marcial    | Executive Director                                             | A ROCHA - Associação Cristã de Estudo e Defesa do Ambiente                             | Portugal                                                   |
| Felix Regasso, Dahyes  | Phd candidate                                                  | Faculdade de Filosofia, Ciências e Letras de Ribeirão Preto, Universidade de São Paulo | Brazil                                                     |
| Fell, Adam             | PHD Applicants                                                 | Stirling University                                                                    | United Kingdom of Great Britain and Northern Ireland (the) |
| Feller, Stephan        | Professor of Tumor Biology                                     | Martin Luther University Halle-Wittenberg                                              | Germany                                                    |
| fellous, simon         | Researcher in biological sciences                              |                                                                                        | France                                                     |
| Fellous, Jean-Louis    |                                                                | Committee on Space Research (COSPAR)                                                   | France                                                     |
| Fellous, Alexandre     | Postdoc in marine evolutionary biology                         | Alfred Wegener Institute (AWI)                                                         | Germany                                                    |
| Felton, Michelle       | Postdoctoral Researcher                                        | University of Reading                                                                  | United Kingdom of Great Britain and Northern Ireland (the) |

|                                      |                                              |                                                                      |                                                            |
|--------------------------------------|----------------------------------------------|----------------------------------------------------------------------|------------------------------------------------------------|
| Femmer, Randolph                     | Editor and Senior Director                   | Biospheric Literacy 101                                              | United States of America (the)                             |
| Fendt, Christian                     | Astrophysicist                               | Max Planck Institute for Astronomy                                   | Germany                                                    |
| Fenet, Serge                         | Assistant professor / Computer science       | Université Lyon 1                                                    | France                                                     |
| Fenn-Moltu, Gyda                     | PhD student in ecology                       | University of Lausanne                                               | Switzerland                                                |
| Fenner, Douglas                      | coral reef biologist                         | Consultant                                                           | American Samoa                                             |
| Fenolio, Dante                       | VP, Conservation & Research                  | Center for Conservation & Research, San Antonio Zoo                  | United States of America (the)                             |
| Feraille, Eric                       | Associate Professor in Fundamental Medicine  | University of Geneva                                                 | Switzerland                                                |
| Ferdinand, Simon                     | Geography and visual culture                 | The University of Amsterdam                                          | Netherlands (the)                                          |
| ferguson, james                      | consulting biochemist                        | University of Toronto                                                | Canada                                                     |
| Ferguson, Elizabeth                  | Marine Ecologist & Educator                  | Ocean Science Analytics                                              | United States of America (the)                             |
| Ferguson, Jan Willem                 | Researcher, Centre for Environmental Studies | University of Pretoria                                               | South Africa                                               |
| Ferguson-Gow, Henry                  | Postdoc (Macroecology and biodiversity)      | University College London                                            | United Kingdom of Great Britain and Northern Ireland (the) |
| Ferkin, Michael                      | Professor                                    |                                                                      | United States of America (the)                             |
| Fermin, Gustavo                      | Full Professor/Molecular Biology             | Universidad de Los Andes                                             | Venezuela (Bolivarian Republic of)                         |
| Fernandes, Paulo                     | Associate Professor, wildland fire           | Universidade de Trás-os-Montes e Alto Douro                          | Portugal                                                   |
| Fernandes, Thiago                    | Researcher                                   | Instituto de Pesquisa do pantanal                                    | Brazil                                                     |
| Fernandes, Daniell Rodrigo Rodrigues | Postdoctoral Researcher                      | Instituto Nacional de Pesquisas da Amazônia                          | Brazil                                                     |
| Fernandes, Rodrigo                   | Associate Professor of Ecology               | Universidade Federal Rural do Semi-Árido                             | Brazil                                                     |
| Fernandes, Soraia                    | PostDoc                                      | ICRC-FNUSA                                                           | Czech Republic (the)                                       |
| Fernandes, Tiago Vinicus             | Ph.D. student                                | Universidade Federal de Minas Gerias                                 | Brazil                                                     |
| Fernandes da Silva, Daniel           | Professor/Zoology                            | Universidade Federal do Rio de Janeiro                               | Brazil                                                     |
| fernandez, camila                    | Oceanography                                 | CNRS                                                                 | France                                                     |
| Fernandez, Fernando A. S.            | Full Professor of Ecology                    | Universidade Federal do Rio de Janeiro                               | Brazil                                                     |
| Fernandez, Maria Isabel              | Instructor of Biology                        | Georgia Gwinnett College                                             | United States of America (the)                             |
| Fernandez, Fernando                  | Full Professor of Ecology                    | Universidade Federal do Rio de Janeiro                               | Brazil                                                     |
| Fernandez, Victor M.                 | Professor (archaeology)                      | Universidad Complutense de Madrid                                    | Spain                                                      |
| Fernández, Néstor                    | Research fellow                              | iDiv German Centre for Integrative Biodiversity Research             | Germany                                                    |
| Fernández, María Elena               | Researcher in Forest Ecology                 | Consejo Nacional de Investigaciones Científicas y Técnicas (CONICET) | Argentina                                                  |
| Fernández, Miguel                    | genetics student                             | Universitat Autònoma de Barcelona                                    | Spain                                                      |
| Fernández, Diana Catalina            | PhD Student                                  | University of Windsor                                                | Canada                                                     |
| Fernandez Bayo, Jesus                | Assistant Professional Researcher            | UC Davis                                                             | United States of America (the)                             |
| Fernández Carrillo, Carlos           | MD, PhD                                      | University of Pittsburgh, USA                                        | Spain                                                      |
| Fernández de Uña, Laura              | Postdoctoral researcher                      | INRA                                                                 | France                                                     |
| Fernández Martín, Begoña             | Biomedicine                                  | University of Alcalá                                                 | Spain                                                      |
| Fernández Martínez, Marcos           | Researcher                                   | Universiteit Antwerpen                                               | Belgium                                                    |
| Fernandez-Delgado, Carlos            | University professor                         | University of Córdoba                                                | Spain                                                      |
| FERNÁNDEZ-GARCIA, CARLOS             | Gesociences                                  | Geosciences Rennes, Univ. Rennes 1                                   | France                                                     |

|                                |                                                 |                                                           |                                                            |
|--------------------------------|-------------------------------------------------|-----------------------------------------------------------|------------------------------------------------------------|
| Fernández-Llamazares, Álvaro   | Post-doctoral research fellow                   | University of Helsinki                                    | Finland                                                    |
| Fernández-Ojanguren, Alfredo   | Assistant Professor of Zoology                  | Universidad de Oviedo                                     | Spain                                                      |
| Fernández-Palacios, José María | Ecology Professor                               | La Laguna University                                      | Spain                                                      |
| Fernández-Palacios, José Maria | Ecology professor                               | University of La Laguna                                   | Spain                                                      |
| Feron, Romain                  | PhD Student                                     | Universite de Lausanne                                    | Switzerland                                                |
| ferrandis, pablo               | full professor/plant ecology                    | university of castilla-la mancha                          | Spain                                                      |
| Ferrant, Sylvain               | Researcher                                      | IRD                                                       | France                                                     |
| Ferrante, Lucas                | Pós-graduação                                   | Instituto Nacional de Pesquisas da Amazônia (INPA)        | Brazil                                                     |
| Ferrara, Maria                 | Research fellow in building engineering physics | Energy department, Politecnico di Torino                  | Italy                                                      |
| Ferrari, Sylvie                | Ecological Economics                            | University of Bordeaux                                    | France                                                     |
| Ferrari, Benoit                | Group leader, ecotoxicologist                   | Swiss Centre For Applied Ecotoxicology                    | Switzerland                                                |
| FERRARI, Marc                  | Astronomer                                      | Aix Marseille Univ, CNRS, CNES, LAM, Marseille            | France                                                     |
| Ferraz, Pollianna              | Biology                                         | Instituto de Desenvolvimento sustentável Mamirauá         | Brazil                                                     |
| Ferraz, Katia                  | Professor                                       | University of Sao Paulo                                   | Brazil                                                     |
| Ferraz Filho, Antonio Carlos   | Professor - Forest Management                   | Federal University of Piauí (UFPI)                        | Brazil                                                     |
| Ferreira, Marina A.            | Post-doctoral researcher in Mathematics         | University of Helsinki                                    | Finland                                                    |
| Ferreira, Maria Julia          | PhD student                                     | Universidade Federal Rural de Pernambuco                  | Brazil                                                     |
| Ferreira, Sofia                | Postdoctorate                                   | University of Oslo                                        | Norway                                                     |
| Ferreira, Alexander C.         | PhD in Aquatic Ecology / Professor              |                                                           | Brazil                                                     |
| Ferreira, Vanessa              | PhD Student                                     | University of Aveiro                                      | Portugal                                                   |
| Ferreira, Juliana              | Master                                          | University of Sao Paulo                                   | Brazil                                                     |
| Ferreira, Catarina             | Conservation Biologist                          | IUCN                                                      | Portugal                                                   |
| Ferreira, Nuno G C             | MSCA Fellow                                     | Cardiff Ubiversity                                        | United Kingdom of Great Britain and Northern Ireland (the) |
| Ferreira, Verónica             | Assistant Researcher                            | University of Coimbra                                     | Portugal                                                   |
| Ferreira, Nícia                | PhD Student                                     | University of Coimbra                                     | Portugal                                                   |
| Ferreira Fernandes, Sofia      | PhD Student                                     | Universidade Aberta & Centre for Funcional Ecology        | Portugal                                                   |
| Ferreira Fontoura, Nelson      | Head of the Institute for the Environment       | PUCRS                                                     | Brazil                                                     |
| Ferreira Jr., Aurino           | Biologist                                       | Autonomous                                                | Brazil                                                     |
| Ferreira Rodríguez, Noé        | PhD, Freshwater ecology                         | Universidade de Vigo                                      | Spain                                                      |
| Ferrenberg, Scott              | Assistant Professor of Biology                  | New Mexico State University                               | United States of America (the)                             |
| Ferrer, Erica                  | PhD Student                                     | UC San Diego                                              | United States of America (the)                             |
| Ferrer, Miguel                 | Research Professor                              | Consejo Superior de Investigaciones Cientificas           | Spain                                                      |
| Ferrer, Juliano                | PhD                                             | Universidade Federal do Rio Grande do Sul                 | Brazil                                                     |
| Ferrer, Martin                 | Energy Engineer                                 | UPC                                                       | Spain                                                      |
| Ferrer-Castán, Dolores         | Associate Professor/Ecologist                   | University of Salamanca                                   | Spain                                                      |
| Ferreras, Pablo                | Senior Researcher                               | Spanish Research Council                                  | Spain                                                      |
| Ferrero, Victoria              | Postdoctoral researcher                         | CEF, Centre for Functional Ecology. University of Coimbra | Portugal                                                   |
| Ferretti, Orlando              | Researcher, Geographer                          | Universidade Federal de Santa Catarina / UFSC.            | Brazil                                                     |
| Ferriere, Regis                | Professor, Ecology and Evolutionary Biology     | Ecole Normale Supérieure & University of Arizona          | United States of America (the)                             |

|                             |                                                                                |                                                                     |                                            |
|-----------------------------|--------------------------------------------------------------------------------|---------------------------------------------------------------------|--------------------------------------------|
| Ferring, Joakim             | Research Assistant                                                             | Chalmers University of Technology                                   | Sweden                                     |
| Ferro-Famil, Laurent        | Prof., Radar remote sensing                                                    | The University of Rennes1                                           | France                                     |
| Ferry, John                 | Professor, Environmental Chemistry                                             | University of South Carolina                                        | United States of America (the)             |
| Fétick, Romain              | PhD student in astrophysics                                                    | Laboratoire d'Astrophysique de Marseille                            | France                                     |
| Fettweis, Xavier            | Prof in climatology                                                            | University of Liège                                                 | Belgium                                    |
| Fewings, Jason              | BSc(Hons) Chemistry, Mineral Science, Process Control, Dip. Project Management | Murdoch University, Curtin University                               | Australia                                  |
| Fewster, Rachel             | Professor, Statistics                                                          | University of Auckland                                              | New Zealand                                |
| Fialkowski, Wojciech        | Associate Professor, Ecology                                                   | Jagiellonian University                                             | Poland                                     |
| Ficetola, Gentile Francesco | Professor of Zoology                                                           | University of Milan                                                 | Italy                                      |
| Fichant, Gwennaele          | Professor Bioinformatics                                                       | University Toulouse III - CNRS                                      | France                                     |
| Fichot, Régis               | PhD in plant physiology                                                        | Université d'Orléans                                                | France                                     |
| Fichtel, Claudia            | Biology                                                                        | German Primate Center                                               | Germany                                    |
| Ficko-Blean, Elizabeth      | Research Scientist                                                             | CNRS                                                                | France                                     |
| Fidler Mis, Nataša          | prof. of nutrition and nutricionist/dietitian                                  | University Medical Centre Ljubljana                                 | Slovenia                                   |
| Fieberg, John               | Associate Professor of Quantitative Ecology                                    | University of Minnesota                                             | United States of America (the)             |
| Fiedler, Sara               |                                                                                | University of Tuebingen                                             | Germany                                    |
| Fiedler, Kevin              | Assistant Professor of Mathematics and Statistics                              | Washington State University                                         | United States of America (the)             |
| Fiesler, Emile              |                                                                                | Bioveyda Biodiversity Inventories                                   | United States of America (the)             |
| Fieux, Etienne              | Mathematics                                                                    | Toulouse Mathematics Institute                                      | France                                     |
| Fievet, Virgil              | Associate Professor - Evolutionary Ecology                                     | INRA - Bordeaux University                                          | France                                     |
| Fife-Cook, Isabel           | Graduate Student, Ethology                                                     | New York University                                                 | United States of America (the)             |
| FIGGENER, CHRISTINE         | Marine Conservation Biologist                                                  | Texas A&M University                                                | United States of America (the)             |
| Figueiredo, Alexandre       | PhD Student in Evolutionary Biology                                            | University of Zurich                                                | Switzerland                                |
| Figuera, Clàudia            | PhD Student                                                                    | Stockholm University                                                | Sweden                                     |
| Figuera, Claudia            | PhD student                                                                    | Stockholm University                                                | Sweden                                     |
| Figueroa, Israel            | Scientist - Microbiology & Bioengineering                                      | Visolis, Inc.                                                       | United States of America (the)             |
| Figueroa, María Eugenia     | Profesor                                                                       | Universidad Nacional de Santiago del Estero                         | Argentina                                  |
| Figueroa, Charles           | Applied Ecologist                                                              | UC Irvine                                                           | United States of America (the)             |
| Figuerola, Blanca           | Postdoc                                                                        | Institute of Marine Science-CSIC                                    | Spain                                      |
| Fijen, Thijs                | Postdoctoral researcher Plant Ecology and Nature Conservation                  | Wageningen University                                               | Netherlands (the)                          |
| Filbet, Francis             | Applied Mathematics                                                            | Université de Toulouse                                              | France                                     |
| Filhol, Simon               | Geoscientist                                                                   |                                                                     | Norway                                     |
| Filipe, Ana Filipa          | Post-doctoral Researcher, Freshwater Ecology                                   | CIBIO-InBIO, University of Porto                                    | Portugal                                   |
| Filipek-Gorniok, Beata      | Researcher                                                                     | Uppsala Univeristy                                                  | Sweden                                     |
| Filipović Marijić, Vlatka   | senior research associate, environmental sciences                              | Ruder Bošković Institute                                            | Croatia                                    |
| Filla, Marc                 | PhD student                                                                    | Workgroup on Endangered Species, Georg-August-Universität Göttingen | Germany                                    |
| Filomena, Filomena          | Registered dietitian                                                           | Sky 777 & Dupuy GmbH                                                | United States Minor Outlying Islands (the) |

|                            |                                                       |                                                                      |                                                            |
|----------------------------|-------------------------------------------------------|----------------------------------------------------------------------|------------------------------------------------------------|
| Finch, Jemma               | Senior Lecturer/Geography                             | University of KwaZulu-Natal                                          | South Africa                                               |
| Finck-Vanstalle, Christian | Nuclear medical physicist                             | CNRS                                                                 | France                                                     |
| Findlay-Robinson, Rachel   | Postgraduate Researcher, Zoology                      | University of Cumbria                                                | United Kingdom of Great Britain and Northern Ireland (the) |
| Findley, Lloyd             | Profesor / Investigador                               | Centro de Investigacion en Alimentacion y Desarrollo- Unidad Guaymas | Mexico                                                     |
| Fink, J Theodore           | Environmental Science and Policy Professor            | Marist College School of Science                                     | United States of America (the)                             |
| Fink, Andreas              | Professor of Meteorology                              | Karlsruhe Institute of Technology                                    | Germany                                                    |
| Finke, Peter               | Full professor in Soil Science                        | Ghent University                                                     | Belgium                                                    |
| Finkenbiner, Catherine     | Ph.D. Student                                         | Oregon State University                                              | United States of America (the)                             |
| Finlayson, Colin           | Professor for Ecology & Biodiversity                  | Charles Sturt University                                             | Australia                                                  |
| Finley, Nina               | Disease ecologist                                     | London School of Hygiene and Tropical Medicine                       | United States of America (the)                             |
| Finney, Declan             | Postdoctoral Research Fellow                          | Institute of Climate and Atmospheric Science, University of Leeds    | United Kingdom of Great Britain and Northern Ireland (the) |
| Fiorani, Fabio             | PhD, Plant Physiology                                 | Forschungszentrum Juelich                                            | Germany                                                    |
| Fiore, Gianluca            | Senior Scientific officer, Joint Research Center      | European Commission                                                  | Italy                                                      |
| Firth, Ron                 | Director and Principal Ecologist                      | Western Ecological                                                   | Australia                                                  |
| Fischer, Oliver            | Physics                                               | Institute of Environmental Physics                                   | Germany                                                    |
| Fischer, David William     | Mycologist                                            | American Mushrooms                                                   | United States of America (the)                             |
| Fischer, Tim               | Oceanography                                          |                                                                      | Germany                                                    |
| Fischer, Julia             | Professor for Primate Cognition                       | German Primate Center / University of Göttingen                      | Germany                                                    |
| Fischer, Luciano Gomes     | Professor, Oceanography and Marine Biology            | Federal University of Rio de Janeiro                                 | Brazil                                                     |
| Fischer, Luciano           | Professor, Oceanography and Marine Biology            | Federal University of Rio de Janeiro                                 | Brazil                                                     |
| FISCHER, Gilles            | Director of research CNRS IN evolutionary genomics    | Sorbonne Université                                                  | France                                                     |
| Fisher, Matthew            | Masters Student                                       | University of Pretoria                                               | South Africa                                               |
| Fisher, Diana              | Associate Professor, Ecology                          | University of Queensland                                             | Australia                                                  |
| Fisher, Mark               |                                                       | Wildland Research Institute, University of Leeds                     | United Kingdom of Great Britain and Northern Ireland (the) |
| Fisher, Alina              | Research Manager & PhD Student, Environmental Studies | University of Victoria                                               | Canada                                                     |
| Fisher, Jim                | Physics                                               | University of Nottingham (now retired)                               | United Kingdom of Great Britain and Northern Ireland (the) |
| Fisher, Judith             | IPBES Multidisciplinary Expert Panel                  | University of Western Australia                                      | Australia                                                  |
| Fisher, Daniel             | Professor of Earth and Environmental Sciences         | University of Michigan                                               | United States of America (the)                             |
| Fisher, Robert Scott       | Director of Undergraduate Studies                     | University of Oregon, Dept. of Physics                               | United States of America (the)                             |
| Fisher, Marla              | Biological Sciences                                   |                                                                      | United States of America (the)                             |
| Fita, Lluís                | Researcher atmospheric science                        | Centro de Investigaciones del Mar y la Atmósfera (CIMA)              | Argentina                                                  |
| Fite, Katherine            | Professor Emerita, Neuroscience and Behavior          | University of Massachusetts, Amherst MA                              | United States of America (the)                             |
| Fitze, Patrick S           |                                                       | Museo Nacional de Ciencias Naturales (MNCN-CSIC)                     | Spain                                                      |
| Fitzpatrick, John          | Executive Director, Cornell Laboratory of Ornithology | Cornell University                                                   | United States of America (the)                             |
| Fitzpatrick, Noel          | Meteorologist/Glaciologist                            | Met Éireann                                                          | Ireland                                                    |

|                                |                                                                                   |                                                                                                                        |                                |
|--------------------------------|-----------------------------------------------------------------------------------|------------------------------------------------------------------------------------------------------------------------|--------------------------------|
| Fitzpatrick, Sally             | Research Fellow, Public Health                                                    | Western Sydney University                                                                                              | Australia                      |
| Fitzpatrick, Benjamin          | Professor of Ecology and Evolutionary Biology                                     | University of Tennessee                                                                                                | United States of America (the) |
| Fiuza de Melo, Maria Margarida | Pesquisadora Científica, aposentada, atualmente Profissional Associada Voluntária | Instituto de Botânica, Secretaria da Infraestrutura e Meio Ambiente, Governo do Estado de São Paulo                    | Brazil                         |
| Flack, Andrea                  | Postdoctoral researcher; Animal behaviour                                         | Max Planck institute of animal behavior                                                                                | Germany                        |
| Flade, Martin                  | Landscape ecologist; director of Schorfheide-Chorin UNESCO Biosphere Reserve      | Schorfheide-Chorin UNESCO Biosphere Reserve                                                                            | Germany                        |
| Flament, Dominique             | Chercheur émérite (Math & History of Math)                                        | CNRS                                                                                                                   | France                         |
| Flechar, Chris R.              | Atmospheric scientist                                                             | INRA                                                                                                                   | France                         |
| Fleck, Steve                   | CEO The Cannabinoid Research Institute / Cannabis / Agriculture / Microbiology    | Eastern Michigan University                                                                                            | United States of America (the) |
| Fleischer-Dogley, Frauke       | Chief Executive Officer                                                           | Seychelles Islands Foundation                                                                                          | Seychelles                     |
| Fleischner, Thomas L.          | Executive Director                                                                | Natural History Institute                                                                                              | United States of America (the) |
| Flemer, Burkhardt              | PostDoc                                                                           | Leibniz-Institute for Vegetable and Ornamental Crops                                                                   | Germany                        |
| Fleming, Ian                   | Professor                                                                         | Memorial University of Newfoundland                                                                                    | Canada                         |
| Fleming, Morgan                | Researcher                                                                        | University of Tennessee Knoxville                                                                                      | United States of America (the) |
| Fleming, C Felton              | Anthropology                                                                      | –                                                                                                                      | United States of America (the) |
| Flemming, Hans-Curt            | Professor emeritus                                                                | Biofilm Centre                                                                                                         | Germany                        |
| Fletcher, Lynn                 | Associate Professor                                                               | Salem State University                                                                                                 | United States of America (the) |
| Fletcher, Chip                 | Associate Dean and Professor Earth Sciences                                       | University of Hawai'i at Mānoa                                                                                         | United States of America (the) |
| Fleurbay, Marc                 | Professor                                                                         | Princeton University                                                                                                   | United States of America (the) |
| Fleurbay, Hélène               | Post-doctoral researcher in physics                                               |                                                                                                                        | France                         |
| Fleury, Marina                 | Research fellow                                                                   | Instituto de Ecología y Biodiversidad, Facultad de Ciencias, Universidad de Chile. Las Palmeras #3425, Nuñoa, Santiago | Chile                          |
| Flexas, Jaume                  | Professor, Plant Physiology                                                       | Universitat de les Illes Balears                                                                                       | Spain                          |
| Flick, Scott                   | Biochemistry/Genetics/Astronomy                                                   | Southern Oregon State College (circa 1994)                                                                             | United States of America (the) |
| Flint, Nicole                  | Research Fellow, Aquatic ecology                                                  | CQUniversity Australia                                                                                                 | Australia                      |
| Floch, Kévin                   | Engineer in pathology plant                                                       |                                                                                                                        | France                         |
| Flood, Keegan                  | Mathematics                                                                       | University of Auckland                                                                                                 | New Zealand                    |
| Flood, Stephen                 | Adaptation Scientist                                                              | MaREI, Environmental Research Institute, University College Cork                                                       | Ireland                        |
| Florence-Bennett, Brittany     | MSc Candidate/ Ecology and Biodiversity                                           | Victoria University of Wellington                                                                                      | New Zealand                    |
| Florencio Diaz, Margarita      | Profesora Ayudante Doctora Evology                                                | Universidad Autónoma de Madrid                                                                                         | Spain                          |
| Florens, Vincent               | Associate Professor of Ecology                                                    | University of Mauritius                                                                                                | Mauritius                      |
| Florenzano, Assunta            | Researcher; Palynologist                                                          | Università di Modena and Reggio Emilia                                                                                 | Italy                          |
| Flores, Omar                   | PhD Candidate in Ecology                                                          | Spanish National Research Council                                                                                      | Spain                          |
| Flores Molleapaza, Mónica      | Biología                                                                          |                                                                                                                        | Peru                           |
| Flores-Verdugo, Francisco J.   | PhD Biological Oceanographer. Mangrove ecology and restoration                    | Institute of Marine Science and Limnology. UNAM.                                                                       | Mexico                         |
| Flórez, Laura V.               | Research Associate                                                                | Institute for Organismic and Molecular Evolution - Johannes Gutenberg University                                       | Germany                        |

|                                  |                                                                        |                                                                   |                                                            |
|----------------------------------|------------------------------------------------------------------------|-------------------------------------------------------------------|------------------------------------------------------------|
| Flower, Emily                    | PhD Candidate                                                          | Griffith University                                               | Australia                                                  |
| Flowers, Gwenn                   | Professor of Earth Sciences                                            | Simon Fraser University                                           | Canada                                                     |
| Flux, John                       | Deputy Director                                                        | Ecology Division DSIR (retired)                                   | New Zealand                                                |
| Foden, Wendy                     | Head: Cape Research Centre                                             | South African National Parks                                      | South Africa                                               |
| Foggin, Marc                     | Research Associate / Sustainable Mountain Development                  | University of British Columbia                                    | Canada                                                     |
| Foggo, Andy                      | Associate Professor of Ecology                                         | University of Plymouth                                            | United Kingdom of Great Britain and Northern Ireland (the) |
| Fogliani, Bruno                  | Deputy director and research scientist in Restoration Ecology          | New Caledonian Agronomic Institute                                | New Caledonia                                              |
| Fogwill, Christopher             | Professor of Glaciology and Palaeoclimate                              | Keele University                                                  | United Kingdom of Great Britain and Northern Ireland (the) |
| Föhre, Bettina                   | doctor                                                                 | Charité                                                           | Germany                                                    |
| Fol Leymarie, Frederic           | Professor of Computing                                                 | Goldsmiths, University of London                                  | United Kingdom of Great Britain and Northern Ireland (the) |
| Folch, Jaume                     | Associate Professor Biochemistry & Molecular Biology                   | Rovira i Virgili University                                       | Spain                                                      |
| Folch-Mallol, Jorge L.           | Professor                                                              | Universidad Autónoma del estado de Morelos                        | Mexico                                                     |
| Földi, Csenge                    | PhD student                                                            | Biological Research Centre, Synthetic and Systems Biology Unit    | Hungary                                                    |
| Föll, Melanie                    | PhD Student Biology                                                    | University of Freiburg                                            | Germany                                                    |
| Foltýnová, Lenka                 | Postdoctoral researcher                                                | Global Change Research Institute, Czech Academy of Sciences, Brno | Czech Republic (the)                                       |
| Fonseca, Tainá                   | PhD                                                                    | University of Algarve                                             | Portugal                                                   |
| Fonseca, Ana                     | Pos-Doc Reserch Fellow                                                 | Instituto de Ciências Agrárias e Ambientais Mediterrânicas        | Portugal                                                   |
| Fonseca da Silva, Vania Carolina | PhD Candidate                                                          | Durham University                                                 | Brazil                                                     |
| Fonseca Fiorini, Cecilia         | PhD candidate                                                          | Federal University of Minas Gerais                                | Brazil                                                     |
| fontaine, colin                  | researcher in ecology                                                  | CNRS                                                              | France                                                     |
| Fontaine, Benoît                 | Ecology                                                                | Muséum national d'Histoire naturelle                              | France                                                     |
| Fontalvo, Ruben                  | Sociólogo. Director Formación para la Investigación                    | Universidad Simón Bolívar                                         | Colombia                                                   |
| Fontana, Luciane                 | Post Doc                                                               | Universidade Federal do ABC                                       | Brazil                                                     |
| Fontcuberta, Josep               | Full Research Professor                                                | Institut de Ciència de Materials de Barcelona (ICMAB-CSIC)        | Spain                                                      |
| Fontcuberta, Amaranta            | PhD candidate                                                          | Université de Lausanne                                            | Switzerland                                                |
| Fontcuberta i Morral, Anna       | Professor/Materials Science                                            | EPFL                                                              | Switzerland                                                |
| Fontecha, Gustavo                | Prof. / Genetics                                                       | Universidad Nacional Autónoma de Honduras                         | Honduras                                                   |
| Fontes, Marco Aurélio            | Associate Professor of Wildlife Ecology and Conservation               | University of Lavras - UFLA                                       | Brazil                                                     |
| Fontrodona-Bach, Adrià           | Research assistant - Glaciology                                        | WSL                                                               | Switzerland                                                |
| Forbes, William                  | Associate Professor of Geography and Sustainable Community Development |                                                                   | United States of America (the)                             |
| Forbes, Cherie                   | PhD candidate - applied palaeoecology and system dynamics              | University of Cape Town                                           | South Africa                                               |

|                             |                                                          |                                                               |                                                            |
|-----------------------------|----------------------------------------------------------|---------------------------------------------------------------|------------------------------------------------------------|
| Forbes, Belinda             | BSc Conservation Biology                                 | Murdoch University                                            | Australia                                                  |
| Forcella, Simona            | Veterinarian - Policy officer                            | European Commission                                           | Italy                                                      |
| Ford, Annie                 | Marine Scientist                                         |                                                               | Australia                                                  |
| Ford, Donald                | Senior Manager, Hydrogeology and Source Water Protection | Toronto and Region Conservation                               | Canada                                                     |
| Ford, Alex                  | Professor of Biology                                     | University of Portsmouth                                      | United Kingdom of Great Britain and Northern Ireland (the) |
| Fordham, Barry              | Adjunct                                                  | Research School of Earth Sciences                             | Australia                                                  |
| Foreman, Kenneth            | Program Director Semester in Environmental Science       | Marine Biological Laboratory, Woods Hole, MA                  | United States of America (the)                             |
| Forero, Dimitri             | Associate Professor; Systematic Entomology               | Pontificia Universidad Javeriana                              | Colombia                                                   |
| Forester, Brenna            | Postdoctoral Research Fellow                             | Colorado State University                                     | United States of America (the)                             |
| Forestier, Sébastien        | PhD candidate, Computer Science                          | INRIA                                                         | France                                                     |
| Forêt, Philippe             | Program Co-director / Geography                          | Swiss Academic Society for Environmental Research and Ecology | Switzerland                                                |
| Forget, Francois            | Senior Scientist, Planetary Sciences                     | CNRS                                                          | France                                                     |
| Forget, Pierre-Michel A.    | Professor Tropical Ecology                               | Museum National Histoire Naturelle                            | France                                                     |
| Formanowicz, Daniel         | Professor (retired)                                      | University of Texas - Arlington                               | United States of America (the)                             |
| Formel, Stephen             | Graduate Student, Ecology                                | Tulane University                                             | United States of America (the)                             |
| Formichetti, Sara           | PhD                                                      | EMBL                                                          | Italy                                                      |
| Fornaro, Mara               | Scientist                                                | NIBR                                                          | Switzerland                                                |
| Fornaroli, Riccardo         | Post-Doc                                                 | Università degli studi di Milano-Bicocca                      | Italy                                                      |
| Forrest, Jessica            | Associate Professor of Biology                           | University of Ottawa                                          | Canada                                                     |
| Forrester, Tavis            | Wildlife Research Biologist                              | Oregon Department of Fish and Wildlife                        | United States of America (the)                             |
| Forss, Sofia                | Postdoc researcher primatology                           | University of Tübingen                                        | Germany                                                    |
| Fort, Philippe              | Cell Biology and Evolution                               | CNRS                                                          | France                                                     |
| Fort, Jerome                | Researcher - Ecology and Ecotoxicology                   | CNRS / LIENSs Institute                                       | France                                                     |
| Fortes Mello, José Henrique | PhD in Ecology                                           | Universidade Federal do Rio de Janeiro                        | Brazil                                                     |
| Fortuna, Taiadjana          | Researcher                                               | IRD                                                           | France                                                     |
| Fortuna Perez, Ana Paula    | Professor                                                | São Paulo State University                                    | Brazil                                                     |
| Forzza, Rafaela             |                                                          | Jardim Botânico do Rio de Janeiro                             | Brazil                                                     |
| Foster, Rachel              | Researcher                                               | Stockholm University                                          | Sweden                                                     |
| Foster, Albert              | Private Conservation Acquisition and Management          | MS Ecosystems Analysis, University of Washington              | United States of America (the)                             |
| Foster, Mercedes S          | Curator Emerita                                          | USGS/Smithsonian Institution                                  | United States of America (the)                             |
| Foster, David               | Director                                                 | Harvard Forest Harvard University                             | United States of America (the)                             |
| Foth, Marcus                | Professor of Urban Informatics                           | QUT Design Lab                                                | Australia                                                  |
| FOUCHER, Anne-Emmanuelle    | PhD-Ingenieur biochimie                                  | CNRS                                                          | France                                                     |
| Fouchez, Dominique          | Physicist                                                | CNRS                                                          | France                                                     |
| Foufopoulos, Johannes       |                                                          | University of Michigan                                        | United States of America (the)                             |
| Foujols, Marie-Alice        | HPC and Climatology                                      | IPSL Institut Pierre Simon Laplace                            | France                                                     |
| Fouladoux, Rani             | Wildlife conservation                                    | Jobless at the moment                                         | Australia                                                  |
| Foulkes, Dr Jeff            | Regional Ecologist                                       | Australian Wildlife Conservancy                               | Australia                                                  |

|                                    |                                                                |                                                                 |                                                            |
|------------------------------------|----------------------------------------------------------------|-----------------------------------------------------------------|------------------------------------------------------------|
| Fountain, Emily                    | Evolutionary Biologist                                         | University of Wisconsin-Madison                                 | United States of America (the)                             |
| FOURCY, Damien                     | GIS analyst / Landscape ecology                                | INRA                                                            | France                                                     |
| Fourie, Arista                     | Postdoctoral fellow in Genetics                                | University of Pretoria                                          | South Africa                                               |
| Fournier, Denis                    | Research associate FRS-FNRS - Evolution, Ecology, Conservation | Université libre de Bruxelles - Evolutionary Biology & Ecology  | Belgium                                                    |
| Fourquez, Marion                   | Microbial oceanography - biogeochemistry                       |                                                                 | France                                                     |
| Fourrier, Marine                   | PhD student - Oceanography                                     | LOV-IMEV, Sorbonne University                                   | France                                                     |
| Fourtune, Lisa                     | PhD in Ecology and Evolutionary Biology                        |                                                                 | France                                                     |
| Fowler, Jane                       | Researcher                                                     | Technical University of Denmark                                 | Denmark                                                    |
| Fox, Barry                         | Honorary Visiting Professor of Biological Science              | University of New South Wales, Sydney                           | Australia                                                  |
| Fox, Helen                         | Coral Reef Ecology                                             | National Geographic Society                                     | United States of America (the)                             |
| Fox, Matthew                       | Researcher                                                     | Texas Tech University                                           | United States of America (the)                             |
| Fox, Clive                         | Fisheries Ecology                                              | Scottish Association for Marine Science                         | United Kingdom of Great Britain and Northern Ireland (the) |
| Fracalanza, Paulo Sérgio           | Professor and Director of Institute of Economics               | University of Campinas (Unicamp)                                | Brazil                                                     |
| Fracasso, Gerardo                  | PhD student in Biology (Parasitology)                          | University of Antwerp                                           | Belgium                                                    |
| Fragoso, Fabiana                   | Post-doctorate research associate - Entomology                 | University of Wisconsin - Madison                               | United States of America (the)                             |
| FRAISSE, Christelle                | PostDoc                                                        | IST Austria                                                     | Austria                                                    |
| Fraixedas, Sara                    | Post-doctoral researcher                                       | Helsinki Institute of Sustainability Science (HELSUS)           | Finland                                                    |
| França, Filipe                     | Postdoctoral researcher                                        | Embrapa Amazônia Oriental                                       | Brazil                                                     |
| Francesiaz, Charlotte              | Researcher                                                     | ONCFS                                                           | France                                                     |
| FRANCHI, IVAN                      | Doctor in Environmental Science                                | Center for Sustainability Research, Universidad Andres Bello    | Chile                                                      |
| Francini-Filho, Ronaldo            | Associate Professor                                            | Federal University of Paraíba                                   | Brazil                                                     |
| Francioli, Davide                  | Postdoc                                                        | Wageningen University                                           | Netherlands (the)                                          |
| Francis, Hunter                    |                                                                | Cal Poly, SLO                                                   | United States of America (the)                             |
| Francisco, Jessica Nayara Carvalho | Master in Systematics, Evolution and Biogeography of Plants    | Universiy of São Paulo                                          | Brazil                                                     |
| Francisco, Fritz                   | PhD Student                                                    | Humboldt University Berlin                                      | Germany                                                    |
| Franck, Fabrice                    | Research director                                              | University of Liège                                             | Belgium                                                    |
| Francke, Oscar                     | Senior Resarcher Arachnology                                   | Universidad Nacional Autonoma de Mexico                         | Mexico                                                     |
| Franckowiak, Ryan                  | Postdoctoral Fellow                                            | Queen's University                                              | Canada                                                     |
| Francksen, Richard                 | Research Associate - Ecology                                   | Newcastle University                                            | United Kingdom of Great Britain and Northern Ireland (the) |
| Franco, Miguel                     | Associate Professor (retired)                                  | University of Plymouth                                          | United Kingdom of Great Britain and Northern Ireland (the) |
| Franco, Ana Clara                  | Postdoc in Ecology                                             | Universidade Federal do Estado do Rio de Janeiro                | Brazil                                                     |
| Franco, José Carlos                | Assistant Professor, Plant Protection                          | Instituto Superior de Agronomia, Universidade de Lisboa         | Portugal                                                   |
| Franco, José                       | Professor in astrophysics                                      | Instituto de Astronomía-Universidad Nacional Autónoma de México | Mexico                                                     |

|                             |                                                                       |                                                               |                                                            |
|-----------------------------|-----------------------------------------------------------------------|---------------------------------------------------------------|------------------------------------------------------------|
| Francois, Sarah             | PhD - virology                                                        | University of Oxford                                          | United Kingdom of Great Britain and Northern Ireland (the) |
| FRANCOIS, Pierre            | Aeronautic teacher                                                    | Université de Bordeaux                                        | France                                                     |
| François, Stéphane          | Atmospheric Chemistry - Energy policies and GHG emissions             | Atmo Bourgogne-Franche-Comté                                  | France                                                     |
| Françoise, Cellier          | Senior Scientist                                                      | INRA                                                          | France                                                     |
| Frandsen, Paul              | Assistant Professor                                                   | Brigham Young University                                      | United States of America (the)                             |
| FRANIEL, IZABELLA           |                                                                       | Uniwersytet Śląski                                            | Poland                                                     |
| Frank, Marc S.              | Extension Botanist                                                    | University of Florida Herbarium                               | United States of America (the)                             |
| Frank, Leonard              | Researcher, Political Science                                         | Freie Universität Berlin                                      | Germany                                                    |
| Franke, Rebeca              | Biologist                                                             |                                                               | Colombia                                                   |
| Frankel, Matt               | MD                                                                    |                                                               | United States of America (the)                             |
| Frankell, Alex              | Postdoctoral fellow in bioinformatics                                 | Francis Crick institute                                       | United Kingdom of Great Britain and Northern Ireland (the) |
| Franken, Oscar              | Postdoc Community Ecology                                             | Vrije Universiteit Amsterdam                                  | Netherlands (the)                                          |
| Franken, Paul               | Professor in Biology                                                  | Univeristy of Lausanne                                        | Switzerland                                                |
| Frankham, Richard           | Emeritus Professor of Biology                                         | Macquarie University                                          | Australia                                                  |
| Frankiewicz, Kamil          | PhD candidate; plant biology                                          | University of Warsaw                                          | Poland                                                     |
| Franklin, Elizabeth         | Researcher                                                            | National Institute for Amazon Research, INPA                  | Brazil                                                     |
| Franklin, Craig             | Professor in Biological Sciences                                      | University of Queensland                                      | Australia                                                  |
| Franklin, Janet             | Distinguished Professor of Biogeography                               | University of California at Riverside                         | United States of America (the)                             |
| Franks, Daniel              | Reader in Ecology                                                     | The University of York                                        | United Kingdom of Great Britain and Northern Ireland (the) |
| Franks, Adele               | MD                                                                    | retired (CDC, Atlanta, GA)                                    | United States of America (the)                             |
| Franquesa-Soler, Montserrat | Postdoc researcher / Primate conservation and Sustainable development | Universidad Autónoma de México / NGO Miku Conservación        | Mexico                                                     |
| Franz, Ismael               | PostDoc                                                               | PUCRS - Pontificia Universidade Católica do Rio Grande do Sul | Brazil                                                     |
| Franzén, Bo                 | Associate Professor                                                   | Karolinska Institutet                                         | Sweden                                                     |
| Fraser, Gail                | Associate Professor, Ecology                                          | Faculty of Environmental Studies, York University             | Canada                                                     |
| Fraser, Nicola              | PhD Candidate                                                         | Southern Cross University                                     | Australia                                                  |
| Fraser, Kate                | Marine Ecology                                                        | University of Tasmania                                        | Australia                                                  |
| Frate, Ludovico             |                                                                       | Università degli Studi del Molise                             | Italy                                                      |
| Fraude, Carolin             | Research Associate                                                    | Institute for Advanced Sustainability Studies (IASS)          | Germany                                                    |
| FRAYSSINET, Eric            | Research Engineer                                                     | CNRS                                                          | France                                                     |
| Freak-Poli, Rosanne         | Epidemiologist                                                        | Monash University                                             | Australia                                                  |
| Fredeen, Arthur             | Professor, Ecosystem Science and Management                           | University of Northern British Columbia                       | Canada                                                     |
| Frediani, Kevin             | Curator of Botanic Garden                                             | University of Dundee                                          | United Kingdom of Great Britain and Northern Ireland (the) |
| Free, Scott                 | Lecturer, Biology Education                                           | University of Washington                                      | United States of America (the)                             |
| Freed, Diana                | Pharmaceutical Chemistry                                              |                                                               | United States of America (the)                             |
| Freed, Emily                | Staff Scientist in Chemical Engineering                               |                                                               | United States of America (the)                             |

|                        |                                                                     |                                                  |                                                            |
|------------------------|---------------------------------------------------------------------|--------------------------------------------------|------------------------------------------------------------|
| Freeman, Brian         | Sr Project Mgr/Environmental Engineer                               | Lakes Software                                   | Canada                                                     |
| Freeman, Amanda        | Ecologist                                                           |                                                  | Australia                                                  |
| Freeman, Alastair      | Ecologist                                                           |                                                  | Australia                                                  |
| Frei, Nicolas          | Assist Prof Plant Biology                                           | University Toulouse III                          | France                                                     |
| Frei, David            | PhD Student                                                         | Eawag and University of Bern                     | Switzerland                                                |
| Freilich, Jerry        | Research Coordinator                                                | National Park Service (Retired)                  | United States of America (the)                             |
| Freilich, Mara         | PhD candidate                                                       | MIT/WHOI                                         | United States of America (the)                             |
| Freire, Guilherme      | Professor at State University of Amazonas / Botany and biodiversity | Universidade do Estado do Amazonas               | Brazil                                                     |
| Freire, Carolina       | Professor of Animal Physiology                                      | Federal University of Parana                     | Brazil                                                     |
| Freire-Fierro, Alina   | Associate Professor and Curator                                     | Universidad Técnica de Cotopaxi                  | Ecuador                                                    |
| Freitag, Anne          | Curator - Entomologist                                              | Museum of zoology                                | Switzerland                                                |
| Freitas, Juliana       |                                                                     | Universidade Federal de São Paulo                | Brazil                                                     |
| Freitas, Helena        | Professor                                                           |                                                  | Portugal                                                   |
| Freitas, Carolina      | Postdoc                                                             | Instituto Nacional de Pesquisas Espaciais (INPE) | Brazil                                                     |
| Freitas, Bárbara       | MSc Student                                                         |                                                  | Portugal                                                   |
| Freitas, Joana         | Master Student                                                      | Faculty of Sciences of University of Porto       | Portugal                                                   |
| Freitas, André V L     | Full Priofessoe                                                     | University of Campinas                           | Brazil                                                     |
| Freitas, Leandro       | Full Researcher - Botany                                            | Rio de Janeiro Botanical Garden                  | Brazil                                                     |
| Frelich, Lee           | Director Center for Forest Ecology                                  | University of Minnesota                          | United States of America (the)                             |
| French, Helena         | Forensic Science                                                    | Bournemouth University                           | United Kingdom of Great Britain and Northern Ireland (the) |
| Frêne, Cristian        | Ecologist                                                           | Institute of ecology and biodiversity            | Chile                                                      |
| Frenot, Yves           | Directeur de Recherche                                              | Université de Rennes 1                           | France                                                     |
| Frere, Jean-marie      | Emeritus professor of biochemistry                                  | Université de Liège                              | Belgium                                                    |
| Frerich, Gerrit        | Sociologist                                                         | University Hospital Cologne                      | Germany                                                    |
| Freud, Róbert          | mathematician                                                       | ELTE Budapest                                    | Hungary                                                    |
| Freund, Madeleine      | Physical Oceanograph                                                | Geomar Kiel                                      | Germany                                                    |
| Freund, James          | Anti-disciplinary Lecturer                                          | Lancaster University Management School           | United Kingdom of Great Britain and Northern Ireland (the) |
| Frew, Adam             | Lecturer (Environment and Sustainability)                           | University of Southern Queensland                | Australia                                                  |
| Frey, Pascal           | Senior scientist, Forest pathology                                  | INRA                                             | France                                                     |
| Frey, Julian           | PHD-Student Forest Ecology Remote Sensing                           | Albert-Ludwigs University of Freiburg            | Germany                                                    |
| Frey, Jennifer         |                                                                     | New Mexico State University                      | United States of America (the)                             |
| Frey, Sibylle          | Enviromental Science                                                | Frey Consulting                                  | United Kingdom of Great Britain and Northern Ireland (the) |
| Frey, Silvia           | Marine Conservation Scientist                                       | KYMA sea conservation & research                 | Switzerland                                                |
| FREY, François         | President, Programme Esprit de VELOX, oceanography                  | 1.618 Programme Esprit de VELOX                  | France                                                     |
| Freyre-Gonzalez, Julio | Associate Professor                                                 | Center for Genomic Sciences, UNAM                | Mexico                                                     |
| Fricke, Ronald         | Biologist                                                           |                                                  | Germany                                                    |
| Friday, James          | Extension Specialist in Forestry                                    | University of Hawaii                             | United States of America (the)                             |

|                                 |                                           |                                                                |                                                            |
|---------------------------------|-------------------------------------------|----------------------------------------------------------------|------------------------------------------------------------|
| friedman, oded                  | Chemist                                   | Bar ilan university                                            | Israel                                                     |
| Friedman, Michael               | Graduate Student - Plant Physiology       | Wright State University                                        | United States of America (the)                             |
| Friedman, Sarah                 | Graduate student, evolutionary biology    | UC Davis                                                       | United States of America (the)                             |
| Friedman, Alexandra             | Ecology and Veterinary Science            | The Royal Veterinary College                                   | United Kingdom of Great Britain and Northern Ireland (the) |
| Friedman, Michael               | Assistant Professor of Biology            | American International College of Arts and Sciences of Antigua | Antigua and Barbuda                                        |
| Frieiro-Costa, Fernando Antônio | Professor                                 | Universidade Federal de Lavras                                 | Brazil                                                     |
| Friel, John                     | Director                                  | Alabama Museum of Natural History                              | United States of America (the)                             |
| Friel, Rosemary                 | Medical Doctor                            | National Health Service                                        | United Kingdom of Great Britain and Northern Ireland (the) |
| Friend, Adam                    | Scientist - Plant Physiology              | The New Zealand Institute for Plant and Food Research Ltd      | New Zealand                                                |
| Fries, Christian                | Professor for Mathematics                 | LMU                                                            | Germany                                                    |
| Friesen, Sarah                  |                                           | University of Victoria                                         | Canada                                                     |
| Friesen, Thomas                 | Reseach Program Manager - Fisheries       | Oregon Department of Fish and Wildlife                         | United States of America (the)                             |
| Friesen, Vicki                  | Professor of Biology                      | Queen's University                                             | Canada                                                     |
| Frieß, Udo                      | Research Scientist, Environmental Physics | Institute of Environmental Physics, Heidelberg University      | Germany                                                    |
| Frigon, Alain                   | Associate Professor                       | Université de Sherbrooke                                       | Canada                                                     |
| Friman, Sonja                   | PhD Student, Environmental Physics        | Institute of Environmental Physics, Heidelberg University      | Germany                                                    |
| Frings, Cornelia                | lecturer (Political Science)              | Institute of Political Science/JGU Mainz                       | Germany                                                    |
| Frisch, Ashley                  | Research Coordinator (Marine Ecology)     | Reef HQ, Great Barrier Reef Marine Park Authority              | Australia                                                  |
| Frisch Jordan, Astrid           | Biology                                   | Ecologia y Conservación de Ballenas, AC                        | Mexico                                                     |
| Frison, Gilles                  | Researcher. Chemistry                     | CNRS                                                           | France                                                     |
| Frison, Eric                    | MD, MPH                                   | CHU Bordeaux                                                   | France                                                     |
| Fritsch, Clémentine             | Scientist in ecotoxicology                | UMR 6249 Chrono-environnement CNRS / UBFC                      | France                                                     |
| Fritsche, Immo                  | Professor of Social Psychology            | University of Leipzig                                          | Germany                                                    |
| Fritz, Herve                    | Senior Researcher                         | CNRS                                                           | France                                                     |
| Frketić, Tea                    | freshwater biologist                      |                                                                | Croatia                                                    |
| Fröbisch, Nadia                 | Professor for Development and Evolution   | Museum für Naturkunde Berlin, Humboldt University Berlin       | Germany                                                    |
| FROCHOT, Isabelle               | Senior Lecturer                           | Université Savoie Mont Blanc                                   | France                                                     |
| Froese, Jens G                  | Biological invasions                      | CSIRO                                                          | Australia                                                  |
| Fröhlich, Marlen                | Postdoc at Department of Anthropology     | University of Zurich                                           | Switzerland                                                |
| Froidevaux, Jeremy              | PostDoc in Conservation Biology           | INRA                                                           | France                                                     |
| Froines, John                   | Professor - Chemical Toxicology           | UCLA                                                           | United States of America (the)                             |
| Froitzheim, Nikolaus            | Professor of Geology                      | Universität Bonn                                               | Germany                                                    |
| Fromhage, Lutz                  | Senior researcher in theoretical biology  | University of Jyväskylä                                        | Finland                                                    |
| Fromin, Nathalie                | senior researcher                         | CNRS                                                           | France                                                     |
| Frongia, Francesca              | PhD                                       | University of Modena and Reggio Emilia                         | Italy                                                      |

|                        |                                                                  |                                                                                                                                                 |                                                            |
|------------------------|------------------------------------------------------------------|-------------------------------------------------------------------------------------------------------------------------------------------------|------------------------------------------------------------|
| Fronhofer, Emanuel A.  | CNRS researcher                                                  | ISEM - CNRS - University of Montpellier                                                                                                         | France                                                     |
| Frost, Pamela          | Vice President, Conservation Biologist                           | Conservation Biology Institute                                                                                                                  | United States of America (the)                             |
| Froy, Hannah           | Evolutionary ecologist                                           | Norwegian University of Science and Technology                                                                                                  | Norway                                                     |
| Frugone, María José    | Msc and PhD (c) in ecology and evolution                         | Universidad de Chile                                                                                                                            | Chile                                                      |
| Fruith, Veronica       | Assistant Professor of Psychology                                | Dominican University of California                                                                                                              | United States of America (the)                             |
| fruitet, elise         | PhD student in evolutionary biology                              | Max Planck Insitute for Chemical Ecology                                                                                                        | Germany                                                    |
| Frumkin, Ron           | Ecological consultant                                            | Dr. Ron Frumkin, Ecological consultancy                                                                                                         | Israel                                                     |
| Fruth, Barara          | Behavioural Ecologist                                            | Livepool John Moores University                                                                                                                 | United Kingdom of Great Britain and Northern Ireland (the) |
| Fry, Gary              |                                                                  | Amphibian Ark                                                                                                                                   | Australia                                                  |
| Fryar, Sally           | Adjunct Senior Lecturer                                          | Flinders University                                                                                                                             | Australia                                                  |
| Fryer, Paul            | Adjunct Professor/ Geography                                     | University of Eastern Finland                                                                                                                   | Finland                                                    |
| Fuchs, Doris           | Professor of International Relations and Sustainable Development | University of Muenster                                                                                                                          | Germany                                                    |
| Fuchs, Heidi           |                                                                  | Lawrence Berkeley National Laboratory                                                                                                           | United States of America (the)                             |
| Fuchs, Jerome          | Maître de Conférences/Evolutionary Biology                       | ISYEB UMR7205 Museum National d'Histoire Naturelle, Paris                                                                                       | France                                                     |
| Fuchs, Stefan          | Scientific project assistant                                     | University of Vienna, Department of Botany and Biodiversity Research Division of Conservation Biology, Vegetation Ecology and Landscape Ecology | Austria                                                    |
| Fudge, Maree           | ECR Researcher                                                   | University of Tasmania                                                                                                                          | Australia                                                  |
| Fuentes, Alfredo       | Research associate/Botany                                        | Herbario Nacional de Bolivia                                                                                                                    | Bolivia (Plurinational State of)                           |
| Fuentes, Nicol         | PhD Biology                                                      | Universidad de Concepcion                                                                                                                       | Chile                                                      |
| Fuentes, Cilia L.      | Emeritus Professor; Agronomy-Weed Scientist                      | National University of Colombia                                                                                                                 | Colombia                                                   |
| Fuentes, Agustin       | Professor of Anthropology                                        | University of Notre Dame                                                                                                                        | United States of America (the)                             |
| Fuentes, Antonio       | Materials Science                                                | Cinvestav del IPN, Unidad Saltillo                                                                                                              | Mexico                                                     |
| Fueyo Mac Donald, Luis | Jubilado                                                         | ISSSTE                                                                                                                                          | Mexico                                                     |
| Fugere, Vincent        | Postdoc                                                          | UQAM                                                                                                                                            | Canada                                                     |
| Fugger, Stefan         | PhD candidate, Glaciology/Hydrology                              | WSL                                                                                                                                             | Switzerland                                                |
| Fuhrman, Jed           | McCulloch Crosby Chair of Marine Biology                         | Univ of Southern California                                                                                                                     | United States of America (the)                             |
| Fuhrman, Jed           | McCulloch-Crosy Chair of Marine Biology                          | University of Southern California                                                                                                               | United States of America (the)                             |
| Füllbrunn, Nadia       | PhD student                                                      | Department of Biology, Division Biochemistry, University of Osnabrück                                                                           | Germany                                                    |
| Fuller, Richard        | Professor                                                        | University of Queensland                                                                                                                        | Australia                                                  |
| Fuller, Andrea         | Professor of Physiology                                          | University of the Witwatersrand                                                                                                                 | South Africa                                               |
| Fulton, J. T.          | Biologist / Refuge Manager (retired)                             | US FWS                                                                                                                                          | United States of America (the)                             |
| Fulton, John           | Educator (ret): biology, ecology, physics                        | MUHSD                                                                                                                                           | United States of America (the)                             |
| Fulton, Graham         | Biologist                                                        | UQ                                                                                                                                              | Australia                                                  |
| Fumagalli, Luca        | Biologist                                                        | University of Lausanne                                                                                                                          | Switzerland                                                |
| Funicelli, Nicholas    | Professor Marine Science                                         | University of Florida                                                                                                                           | United States of America (the)                             |
| Funk, W. Chris         | Professor                                                        | Colorado State University                                                                                                                       | United States of America (the)                             |
| FURIAN, Sonia          | Geograph - retired                                               | University of São Paulo                                                                                                                         | Brazil                                                     |

|                             |                                                            |                                                                                        |                                                            |
|-----------------------------|------------------------------------------------------------|----------------------------------------------------------------------------------------|------------------------------------------------------------|
| Furió, Marc                 | Palaeontologist - Research                                 | Institut Català de Paleontologia Miquel Crusafont                                      | Spain                                                      |
| Furnival, Louise            | General Practitioner                                       | Nhs                                                                                    | United Kingdom of Great Britain and Northern Ireland (the) |
| Fürtges, Leon               | Analytical Chemist, PhD                                    |                                                                                        | Germany                                                    |
| Fuss, Thomas                | PhD candidate, Freshwater Ecology                          | Leibniz-Institute of Freshwater Ecology and Inland Fisheries                           | Germany                                                    |
| Fuster, Joan                | M.D. PhD                                                   | Àptima Centre Clinic                                                                   | Spain                                                      |
| Futhazar, Guillaume         | Law                                                        | Max Planck                                                                             | Germany                                                    |
| G, Pranavathiyani           | PhD Student                                                | Centre for Bioinformatics, Pondicherry University                                      | India                                                      |
| G Santos, Robson            | Associate Professor / Zoology and Conservation Biology     | Universidade Federal de Alagoas                                                        | Brazil                                                     |
| G. Valdecasas, Antonio      | Senior Researcher                                          | Museo Nacional de Ciencias Naturales                                                   | Spain                                                      |
| G. Zacho, Claus             |                                                            | Globe institute, Centre for GeoGenetics, University of Copenhagen                      | Denmark                                                    |
| G00d, Allen                 | Professor/Genetics                                         | University of Alberta                                                                  | Canada                                                     |
| Gäb, Fabian                 | PhD-Student - Geology                                      | University of Bonn                                                                     | Germany                                                    |
| Gabain, Isobel              | MSc One Health student                                     | Royal veterinary College                                                               | United Kingdom of Great Britain and Northern Ireland (the) |
| Gabandé-Rodríguez, Enrique  |                                                            | Centro de Biología Molecular Severo Ochoa                                              | Spain                                                      |
| Gabarro Prats, Carolina     | Research scientist                                         | CSIC                                                                                   | Spain                                                      |
| Gabellini, Aurelia          | Research assistant                                         |                                                                                        | Brazil                                                     |
| Gabor, Caitlin              | Professor of Biology                                       | Texas State University                                                                 | United States of America (the)                             |
| Gaboriau, Théo              | PostDoctoral fellow in evolutionary biology                | Université de Lausanne                                                                 | Switzerland                                                |
| Gabriel, Viktoria           | Assistant for Spacial Planning                             | TU Wien                                                                                | Austria                                                    |
| Gabrysich, Sabine           | Professor for climate change and health                    | Potsdam Institute for Climate Impact Research and Charité - Universitätsmedizin Berlin | Germany                                                    |
| Gacek, Katarzyna            | Post doctoral researcher                                   | Plant Breeding and Acclimatization Institute National Research Institute               | Poland                                                     |
| GACHET, Sophie              | Ecology                                                    | Aix Marseille University                                                               | France                                                     |
| Gacia, Esperança            | Research Scientist, Ecology                                | CEAB-CSIC                                                                              | Spain                                                      |
| Gadda, Tatiana Maria        | Professor                                                  | UTFPR                                                                                  | Brazil                                                     |
| Gadgil, Ashok               | Professor                                                  | University of California, Berkeley                                                     | United States of America (the)                             |
| Gagen, Sonja                | Graduate Student Environmental Engineering                 | University of Michigan                                                                 | United States of America (the)                             |
| Gager, Leslie               | PhD student                                                | IUEM                                                                                   | France                                                     |
| Gager, Yann                 | Biology                                                    |                                                                                        | Germany                                                    |
| Gaget, Elie                 | Postdoctoral researcher-Conservation Biology               | University of Turkuk                                                                   | Finland                                                    |
| Gagliardi-Urrutia, Giussepe | Doctoral Student/ herpetology                              | Pontificia Universidade Católica do Rio Grande do Sul                                  | Peru                                                       |
| Gagnaire, Pierre-Alexandre  | Researcher                                                 | CNRS                                                                                   | France                                                     |
| Gagnon, Rhonda              | MES                                                        |                                                                                        | Canada                                                     |
| Gagnon, Patrick             | Professor of Marine Biology and Ecology                    | Memorial University of Newfoundland                                                    | Canada                                                     |
| Gagnon, Karine              | Post-doctoral researcher, Environmental and Marine Biology | Åbo Akademi University                                                                 | Finland                                                    |

|                          |                                                                   |                                                                                             |                                                            |
|--------------------------|-------------------------------------------------------------------|---------------------------------------------------------------------------------------------|------------------------------------------------------------|
| Gagnon, Alyson           | Master student                                                    | Université du Québec à Chicoutimi                                                           | Canada                                                     |
| Gaidarenko, Olga         | Postdoctoral Researcher, Biology                                  | UC Berkeley/HHMI                                                                            | United States of America (the)                             |
| Gailis, Janis            | Senior researcher                                                 | Latvia University of Life Sciences and Technologies                                         | Latvia                                                     |
| Gaillon, Yves            | Horticulteur                                                      | Gaillon fleurs et plantes                                                                   | France                                                     |
| Gaiotto, Fernanda Amato  | Full Professor / Population Genetics                              | Universidade Estadual de Santa Cruz                                                         | Brazil                                                     |
| Gajardo, Gonzalo         | professor, Biodiversity                                           |                                                                                             | Chile                                                      |
| Gajewski, Piotr          | soil sciences                                                     | UPP Poznań                                                                                  | Poland                                                     |
| Gakhar, Lokesh           | Associate Professor, Structural Biology                           | University of Iowa                                                                          | United States of America (the)                             |
| Galan, Carmen            | Professor University on Botany                                    | University of Cordoba                                                                       | Spain                                                      |
| Galante, Eduardo         | Professor of Zoology                                              | Research Institute CIBIO (Centro Iberoamericano de la Biodiversidad), Univertiy of Alicante | Spain                                                      |
| Galbany, Jordi           | Adjunct Professor                                                 | University of Barcelona                                                                     | Spain                                                      |
| Galbraith, Josie         | Avian ecologist & natural science curator                         | Auckland Museum                                                                             | New Zealand                                                |
| Galbusera, Peter         | biologist researcher                                              | Centre for Research and Conservation                                                        | Belgium                                                    |
| GALEN, CANDACE           | Professor                                                         | University of Missouri                                                                      | United States of America (the)                             |
| Galewski, Thomas         | Project Leader                                                    | Tour du Valat Research Institute                                                            | France                                                     |
| Galipaud, Matthias       | Postdoc                                                           | university of Zurich                                                                        | Switzerland                                                |
| Gall, Gabriella          | postdoctoral researcher                                           |                                                                                             | Germany                                                    |
| Gallagher, Michael       | Molecular biologist                                               | Whitehead Institute for Biomedical Research                                                 | United States of America (the)                             |
| Gallart, Francesc        | Research Professor, Hydrology                                     | IDAEA, CSIC (Spanish Research Council)                                                      | Spain                                                      |
| Gallaugh, Patricia       | Adjunct Professor, Biosciences                                    | Simon Fraser University                                                                     | Canada                                                     |
| Galle, Sylvie            | Senior researcher, water cycle in West Africa                     | IRD                                                                                         | France                                                     |
| Gallego-Abenza, Mario    | PhD candidate Cognitive Biology                                   | University of Vienna                                                                        | Austria                                                    |
| Gallego-Gomez, Francisco | Researcher, Material Science                                      | Spanish Research Council (CSIC)                                                             | Spain                                                      |
| Gallego-Zamorano, Juan   | PhD in Ecology and Conservation Biology                           | Radboud University                                                                          | Netherlands (the)                                          |
| Gallegos, Cristobal      | Evolutionary Ecology PhD Student                                  | Monash University                                                                           | Australia                                                  |
| Gallemi Perez, Aina      | PhD candidate on Synthetic Biology                                | MPI for Dynamics and Self-Organization                                                      | Germany                                                    |
| Gallet, Alison           | PhD - Microbiology                                                | National museum of natural history of Paris                                                 | France                                                     |
| Gallet, Sébastien        | Associate Professor in Ecology                                    | University of Brest                                                                         | France                                                     |
| GALLET, Christiane       | Pr                                                                | Laboratory of alpine ecology                                                                | France                                                     |
| Galli, Alessandro        | PhD                                                               | Global Footprint Network                                                                    | Switzerland                                                |
| Galli, Loris             | Zoology - Researcher                                              | Genoa University                                                                            | Italy                                                      |
| Gallo, Patricia          | Forest Policy and Development                                     | BlauVerda Deutschland e.V.                                                                  | Brazil                                                     |
| Gallo, Marta             | Post-Doc                                                          | Politecnico di Torino                                                                       | Italy                                                      |
| Galloni, Marta           | Associate Professor of Botany                                     | University of Bologna                                                                       | Italy                                                      |
| Galobart, Àngel          | Head of Mesozoic Research Group                                   | Institut Català de Paleontologia Miquel Crusafont                                           | Spain                                                      |
| Galt, Ryan               | Professor, Department of Human Ecology & Geography Graduate Group | University of California, Davis                                                             | United States of America (the)                             |
| Galvez Ruiz, David       | Professor                                                         | Departament pf Statistics an Operational Research                                           | Spain                                                      |
| Galvez-Bravo, Lucia      | Lecturer in Conservation Ecology                                  | Liverpool John Moores University                                                            | United Kingdom of Great Britain and Northern Ireland (the) |

|                               |                                                |                                                                      |                                                            |
|-------------------------------|------------------------------------------------|----------------------------------------------------------------------|------------------------------------------------------------|
| Gálvez-Valdivieso, Gregorio   | Assistant Professor in Plant Physiology        | Universidad de Córdoba                                               | Spain                                                      |
| Gamache, Robert               | Professor of Atmospheric Science               | University of Massachusetts Lowell                                   | United States of America (the)                             |
| Gamba, Marco                  | Ass. Professor - Zoology                       | University of Torino                                                 | Italy                                                      |
| Gambetta, Maria Cristina      | Assistant Professor in Epigenetics             | University of Lausanne                                               | Switzerland                                                |
| GAMBETTA, Gregory             | Professor of Viticulture                       | Bordeaux Sciecnas Agro / Institut des Sciences de la Vigne et du Vin | France                                                     |
| Gamboa, Fabrice               | Professor Mathematics                          | Institut de Mathématiques de Toulouse                                | France                                                     |
| Gamboa Alurralde, Santiago    | Biologist                                      | Universidad Nacional de Tucumán                                      | Argentina                                                  |
| Gamfeldt, Lars                | Lecturer                                       | University of Gothenburg                                             | Sweden                                                     |
| Gamito, Sofia                 | Assistant Professor                            | University of Algarve                                                | Portugal                                                   |
| Gammon, Richard               | Professor Emeritus, Chemistry and Oceanography | University of Washington                                             | United States of America (the)                             |
| Ganapathi, Geetha             | Professor                                      | P S G College of Technology                                          | India                                                      |
| Ganault, Jeanne               | PhD Student in Sociology                       | CREST                                                                | France                                                     |
| Gandin, Anthony               | Assistant Professor                            |                                                                      | France                                                     |
| Ganem, Guila                  | Researcher Evolutionary Ecology                | CNRS, Montpellier University ISEM                                    | France                                                     |
| Gangloff, Benoit              | ecology                                        |                                                                      | France                                                     |
| Gangloff, Eric                | Assistant Professor of Zoology                 | Ohio Wesleyan University                                             | United States of America (the)                             |
| Ganivet, Elias                | Independant scholar                            |                                                                      | France                                                     |
| Ganseforth, Sonja             | Senior Research Fellow                         | German Institute for Japanese Studies (DIJ), Tokyo                   | Japan                                                      |
| Gantner, Gösta                | Research Fellow                                | University of Heidelberg, Theological Departement                    | Germany                                                    |
| Garabedian, James             | Wildlife and Conservation Biology              | North Carolina State University                                      | United States of America (the)                             |
| Garamszegi, László Zsolt      | director                                       | Centre for Ecological Research, Institute of Ecology and Botany      | Hungary                                                    |
| Garand, Marie-Josée           | Soil Science                                   |                                                                      | Canada                                                     |
| Garay, Adriana                | Researcher                                     | UNAM                                                                 | Mexico                                                     |
| Garcia, Beatriz               | Professor, Astronomer                          | National technological Universuty, CONICET                           | Argentina                                                  |
| Garcia, Leticia               | Professor / Restoration Ecology                | University of Mato grosso do Sul (UFMS)                              | Brazil                                                     |
| Garcia, Sarahi                | Researcher                                     | Uppsala University                                                   | Sweden                                                     |
| Garcia, Melissa               | Research Fellow                                | University of Adelaide                                               | Australia                                                  |
| Garcia, Edenise               | Deputy Science Manager                         | The Nature Conservancy                                               | Brazil                                                     |
| Garcia, Maxime                | PhD in Bioinformatics                          | Karolinska institutet                                                | Sweden                                                     |
| Garcia, Juana                 | Associate Proffesor                            | Universidad de los Andes                                             | Colombia                                                   |
| García, Francisca C.          | Associate research fellow                      | University of Exeter                                                 | United Kingdom of Great Britain and Northern Ireland (the) |
| García, Daniel                | Senior Lecturer of Ecology                     | Universidad de Oviedo                                                | Spain                                                      |
| García Criado, Mariana        | PhD Researcher                                 | The University of Edinburgh                                          | United Kingdom of Great Britain and Northern Ireland (the) |
| Garcia Fernandez, Juan Carlos | Engineer                                       | Airbus                                                               | Spain                                                      |
| García García, Brisol         |                                                | Universidad de Guanajuato                                            | Mexico                                                     |
| Garcia Hernandez, Diana Edisa | PhD student                                    | University of Groningen                                              | Netherlands (the)                                          |
| Garcia Mijares, Miriam        | Professor /Experimental Psychology             | University of São Paulo                                              | Brazil                                                     |

|                                 |                                                              |                                                                                   |                                                            |
|---------------------------------|--------------------------------------------------------------|-----------------------------------------------------------------------------------|------------------------------------------------------------|
| Garcia Molina, Marta            | Research Technician, Paleoclimatology                        | CEREGE. Aix-Marseille University                                                  | France                                                     |
| García Robles, Helena           | Researcher                                                   | University of Granada                                                             | Spain                                                      |
| Garcia Rodrigues, João          | Researcher - Social-ecological systems                       | Facultade de Ciencias Políticas e Sociais, Universidade de Santiago de Compostela | Spain                                                      |
| García Salom, Miguel            | Professor of Physiology                                      | Universidad de Murcia                                                             | Spain                                                      |
| Garcia Saravia, Cris            | PhD Researcher in Circular Economy                           | Maastricht University                                                             | Netherlands (the)                                          |
| Garcia Silveira, Daniel         | PhD Student                                                  | Doñana Biological Station                                                         | Spain                                                      |
| Garcia- Gomez, Beatriz          | PhD student in Oceanography                                  | Universite Grenoble ALpes                                                         | Mexico                                                     |
| Garcia-Aguilar, María           | Biologist                                                    | CICESE                                                                            | Mexico                                                     |
| García-Alaminos, Ángela         | PhD student, Economics                                       | University of Castilla-La Mancha                                                  | Spain                                                      |
| García-Berthou, Emili           | Professor of Ecology                                         | University of Girona                                                              | Spain                                                      |
| García-Callejas, David          | Postdoctoral researcher                                      | Doñana Biological Station, CSIC                                                   | Spain                                                      |
| García-Charton, José Antonio    | Associate Professor of Ecology                               | University of Murcia                                                              | Spain                                                      |
| Garcia-Estrada, Carlos          | Researcher (Biotechnology)                                   | INBIOTEC, Instituto de Biotecnología de León                                      | Spain                                                      |
| Garcia-Gonzalez, Francisco      | Senior scientist (Científico Titular) - Evolutionary Biology | Estación Biológica de Donana (Spanish Research Council)                           | Spain                                                      |
| García-Guzmán, Graciela         | Researcher/Ecology and Evolution                             | Universidad Nacional Autónoma de México                                           | Mexico                                                     |
| Garcia-Macias, Antonio          | Full-time Researcher, Computer Science                       | CICESE Research Center                                                            | Mexico                                                     |
| Garcia-Mouton, Cristina         | PhD student                                                  | Complutense University of Madrid                                                  | Spain                                                      |
| García-Orta, Luis M.            | Environmental Science Professor                              | Puerto Rico Institute Technology - Ponce Campus                                   | Puerto Rico                                                |
| Garcia-Pausas, Jordi            | Postdoc, Ecology                                             | Forest Science Centre of Catalonia (CTFC)                                         | Spain                                                      |
| García-Roger, Eduardo M.        | Assistant professor in Ecology                               | Universitat de València                                                           | Spain                                                      |
| Garcia-Saez, Isabel             | Researcher                                                   | CNRS                                                                              | France                                                     |
| García-Salgado, Gonzalo         | PhD, Ecology                                                 | Freelance                                                                         | Spain                                                      |
| García-Timmermans, Cristina     | PhD researcher in Bioscience Engineering                     | Ghent University                                                                  | Belgium                                                    |
| García-Valdés, Raúl             | Postdoc                                                      | CREAF                                                                             | Spain                                                      |
| García-Velásquez, Carlos Andrés | PhD Candidate                                                | Maastricht University                                                             | Netherlands (the)                                          |
| García-Vidal, Jorge             | Professor Computer Science                                   | Universitat Politècnica de Catalunya (Barcelona, Spain)                           | Spain                                                      |
| Garcia-Vozmediano, Aitor        | Phd student in Veterinary Sciences                           | University of Turin                                                               | Italy                                                      |
| Garczarek, Laurence             | Senior Researcher                                            | CNRS                                                                              | France                                                     |
| Gardali, Thomas                 | Ecologist                                                    | Point Blue Conservation Science                                                   | United States of America (the)                             |
| Gardarin, Antoine               | Agroecology                                                  | AgroParisTech                                                                     | France                                                     |
| Garde, Baptiste                 | PhD Student in Animal Behaviour and Ecology                  |                                                                                   | France                                                     |
| Gardes, Monique                 | Professor                                                    | University of Toulouse                                                            | France                                                     |
| Gardiner, Matthew               | Researcher: primatology                                      | University of Lethbridge, Canada                                                  | United Kingdom of Great Britain and Northern Ireland (the) |
| Gardiner, Riana                 |                                                              | University of Sunshine Coast                                                      | Australia                                                  |
| Gardiner, Christine Perala      | Geography                                                    | Portland State University, retired                                                | United States of America (the)                             |
| Gardiner, Dr. Christine         | Principal,                                                   | WaterCycle LLC, (ex Middlesex Univ UK, Portland State Univ.)                      | United States of America (the)                             |

|                              |                                                                    |                                                                                          |                                                            |
|------------------------------|--------------------------------------------------------------------|------------------------------------------------------------------------------------------|------------------------------------------------------------|
| Gardiner, Dr. John           | Chief Bioengineer                                                  | River Docs (ex-Imperial College, Southampton & Middlesex Univs and Portland State Univ.) | United States of America (the)                             |
| Gardner, Charlie             | Lecturer in Conservation Biology                                   | University of Kent                                                                       | United Kingdom of Great Britain and Northern Ireland (the) |
| Gardner, Kathryn             | Conservation Biology MSc candidate                                 | University of Cape Town                                                                  | South Africa                                               |
| Garduño-Juárez, Ramón        | Research Professor                                                 | Universidad Nacional Autónoma de México                                                  | Mexico                                                     |
| Garey, Michel                | Professor - Ecology                                                | Universidade Federal da Integração Latino-Americana                                      | Brazil                                                     |
| Garilleti, Ricardo           | Professor, Botany                                                  | University of Valencia                                                                   | Spain                                                      |
| Garnier, Julie               | Biodiversity Conservation                                          | Odyssey Conservation Trust                                                               | France                                                     |
| Garnier, Josette             | Research Director, Biogeochemistry                                 | CNRS                                                                                     | France                                                     |
| Garnier, Eric                | Research Director - Plant ecology                                  | Centre National de la Recherche Scientifique                                             | France                                                     |
| Garnier, Lisa                | Ecology                                                            |                                                                                          | France                                                     |
| Garnier, Aurélie             | Postdoc                                                            | Institute for Marine Ecosystem and Fisheries Sciences                                    | Germany                                                    |
| Garnier, Monica              | Researcher                                                         | National Research Council, Water Research Institute                                      | Italy                                                      |
| Garnier, Emmanuel            | Research Professor                                                 | CNRS                                                                                     | France                                                     |
| Garrabou, Joaquim            | Senior Researcher                                                  | Spanish Research Council CSIC                                                            | Spain                                                      |
| Garran, Thomas               | Agroecology                                                        | China Academy of Chinese Medical Sciences                                                | China                                                      |
| Garrigue, Claire             | Senior scientits                                                   | IRD                                                                                      | New Caledonia                                              |
| Garrill, Ashley              | Associate Professor                                                | University of Canterbury                                                                 | New Zealand                                                |
| Garrison, Julie              | PhD candidate, Marine Biology                                      | Stockholm University                                                                     | Sweden                                                     |
| Garteizgogeoasca, María      | PhD                                                                | Artec Forschungszentrum Nachhaltigkeit                                                   | Germany                                                    |
| Garvey, Patrick              | Scientist                                                          | Landcare Research (MWLR)                                                                 | New Zealand                                                |
| Garza-Perez, Joaquin Rodrigo | Professor, Coral Reefs, GIS, Remote Sensing                        | UNAM                                                                                     | Mexico                                                     |
| Garzoli, Laura               | Post Doc, Biologist, Ecologist                                     | University of Pavia                                                                      | Italy                                                      |
| Gascoin, Simon               | research scientist                                                 | CNRS                                                                                     | France                                                     |
| Gascon Gubieda, Alicia       | PhD Researcher in Cell Biology                                     | Newcastle University                                                                     | United Kingdom of Great Britain and Northern Ireland (the) |
| GASCUEL, Didier              | Prof. in marie ecology                                             | Agrocampus Ouest                                                                         | France                                                     |
| Gaskell, Benjamin Henry      | Natural historian and mechanical engineer                          |                                                                                          | United Kingdom of Great Britain and Northern Ireland (the) |
| Gaspar, Augusta              | Professor                                                          | Universidade Catolica Portuguesa                                                         | Portugal                                                   |
| Gaspard, François            | PhD Student                                                        | Earth & Life Institute, UCLouvain                                                        | Belgium                                                    |
| Gašparović, Blaženka         | Senior scientist                                                   | Ruder Bošković Institute                                                                 | Croatia                                                    |
| Gasselin, Pierre             | Geographer                                                         | French National Institute of Agricultural Research (INRA)                                | France                                                     |
| Gatt, Jurgen R.              | Doctor of Medicine and Doctor in History and Philosophy of Science | University of Malta; St. James Hospital                                                  | Malta                                                      |
| Gatti, Marco                 | PhD student                                                        | IFAE                                                                                     | Spain                                                      |
| Gatti, jean-luc              | DR2 biochemistry                                                   | Institut National Recherche Agronomique                                                  | France                                                     |
| Gatto, Laurent               | Professor of bioinformatics                                        | UCLouvain                                                                                | Belgium                                                    |
| Gattuso, Jean-Pierre         | Research Professor (Oceanography)                                  | CNRS, Sorbonne University, Iddri                                                         | France                                                     |

|                           |                                                                            |                                                                                               |                                                            |
|---------------------------|----------------------------------------------------------------------------|-----------------------------------------------------------------------------------------------|------------------------------------------------------------|
| Gaul, Liam                | PhD student                                                                | The Francis Crick Institute                                                                   | United Kingdom of Great Britain and Northern Ireland (the) |
| Gauld, Jethro             | PhD Student                                                                | University of East Anglia                                                                     | United Kingdom of Great Britain and Northern Ireland (the) |
| Gaume, Laurence           | Researcher / Ecology                                                       | CNRS / University of Montpellier                                                              | France                                                     |
| Gauquelin, Thierry        | Professor Ecology, Biodiversity, climate change                            | Institut Méditerranéen de Biodiversité et Ecologie, Aix Marseille University, CNRS            | France                                                     |
| GAURAV, Dr. VIVEK         | RESEARCHER, ENVIRONMENTAL ENGINEERING                                      | INDIAN INSTITUTE OF TECHNOLOGY ROORKEE                                                        | India                                                      |
| GAURAV, NITIKA            | Phd Research Scholar                                                       | Indian Institute of technology Delhi                                                          | India                                                      |
| Gautier, Stéfani          | researcher                                                                 | earthwatch                                                                                    | United Kingdom of Great Britain and Northern Ireland (the) |
| Gautier, Elsa             | Research engineer                                                          | CNRS                                                                                          | France                                                     |
| Gavai, Anand              | Senior Scientist Food Safety Data                                          | Wageningen Food Safety Research                                                               | Netherlands (the)                                          |
| Gavilano, Alexandra       | Research Scientist                                                         | Centre for Development and Environment, University of Bern                                    | Switzerland                                                |
| Gavito Pardo, Mayra Elena | Senior researcher                                                          | Universidad Nacional Autónoma de México                                                       | Mexico                                                     |
| Gavrichkova, Olga         | Researcher                                                                 | National Research Council                                                                     | Italy                                                      |
| Gay Garcia, Carlos        | Researcher/ Atmospheric Sciences                                           | Universidad Nacional Autonoma de Mexico/UNAM                                                  | Mexico                                                     |
| Gayà-Vidal, Magdalena     | Postdoctoral Researcher                                                    | Research Center in Biodiversity and Genetic Resources (CIBIO)                                 | Portugal                                                   |
| Gayeski, Nick             | Fisheries Scientist                                                        | Wild Fish Conservancy                                                                         | United States of America (the)                             |
| Gaysina, Darya            | Senior Lecturer in Psychology                                              | University of Sussex                                                                          | United Kingdom of Great Britain and Northern Ireland (the) |
| Gazave, Eve               | Researcher                                                                 | CNRS                                                                                          | France                                                     |
| Gazzana Barros, Gabriel   | PhD student                                                                | National Institute of Amazonia Research - INPA                                                | Brazil                                                     |
| Gazzola, Andrea           | Wildlife biologist                                                         | Association for the Conservation of Biological Diversity (ACDB)                               | Romania                                                    |
| Ge, Ruowen                | Associate Professor                                                        | National University of Singapore                                                              | Singapore                                                  |
| Gebauer, Tobias           | Assistant Professor Plant Ecology and Ecosystem Research                   | University of Freiburg, Geobotany                                                             | Germany                                                    |
| Gebhardt, Stefan          | Priv.-Doz. Dr., Affiliate scientist, Medicine                              | University of Marburg                                                                         | Germany                                                    |
| GEBREKIRO, Solomon Tesfay | PhD student/Biology                                                        | KU Leuven/Mekelle University                                                                  | Ethiopia                                                   |
| GEBREYES, WONDWOSSEN      |                                                                            | The Ohio State University                                                                     | United States of America (the)                             |
| Geens, Bart               | Junior PhD student, molecular biology                                      | KU Leuven                                                                                     | Belgium                                                    |
| Geffroy, Françoise        | engineer                                                                   | CEA                                                                                           | France                                                     |
| Gehan, Charlotte          | Postdoctoral researcher in Astrophysics                                    | Centro de Astrofísica da Universidade do Porto, Instituto de Astrofísica e Ciências do Espaço | Portugal                                                   |
| Gehrels, Roland           | Professor in Physical Geography                                            | University of York                                                                            | United Kingdom of Great Britain and Northern Ireland (the) |
| Geigle, Klaus Peter       | Combustion Scientist                                                       | German Aerospace Center (DLR)                                                                 | Germany                                                    |
| Geijzendorffer, Ilse      | Senior researcher and coordinator of the Mediterranean Wetland Observatory | Tour du Valat                                                                                 | France                                                     |
| Geipel, Inga              | Postdoctoral Researcher, Biologist                                         | Smithsonian Tropical Research Institute                                                       | Panama                                                     |

|                       |                                                                                                                      |                                                                        |                                                            |
|-----------------------|----------------------------------------------------------------------------------------------------------------------|------------------------------------------------------------------------|------------------------------------------------------------|
| Geise, Lena           | Associate Professor                                                                                                  | State University of Rio de Janeiro                                     | Brazil                                                     |
| Geisen, Carla         | PhD Candidate                                                                                                        | LOCEAN-IPSL, Sorbonne Université                                       | France                                                     |
| Geissbühler, David    | Research Associate in Machine Learning and Computer Vision. Prev. Theoretical Physics and Computational Engineering. | Idiap Research Institut                                                | Switzerland                                                |
| Geldermans, Bob       | Researcher Circularity in the Built Environment                                                                      | Delft University of Technology                                         | Netherlands (the)                                          |
| Gelmini, Ylenia       | PhD candidate in Hydrology                                                                                           | University of Padova                                                   | Italy                                                      |
| Gelsthorpe, David     | Museum Geology Curator                                                                                               | Manchester Museum                                                      | United Kingdom of Great Britain and Northern Ireland (the) |
| Gembris, Dr. Daniel   | Lecturer/Teaching professor                                                                                          | University of cooperative education Saxony                             | Germany                                                    |
| Gemmell, Neil         | Distinguished Professor of Reproduction and Genomics                                                                 | University of Otago                                                    | New Zealand                                                |
| Genaro, Julio A       | Entomology                                                                                                           | Caribbean Natural History Group                                        | Canada                                                     |
| Genes, Luísa          | PhD Student - Biology                                                                                                | Stanford University                                                    | Brazil                                                     |
| GENIN, Didier         | Research Scientist                                                                                                   | Institut de Recherche pour le Développement (IRD)                      | France                                                     |
| Gennari, Giulia       | PhD student in Neuroscience                                                                                          | Neurospin (CEA Saclay, Paris)                                          | France                                                     |
| Génot, Benoît         | Engineer, Hydrology                                                                                                  | IRSTEA                                                                 | France                                                     |
| Genoud, Michel        | External Scientific Collaborator, Physiological Ecology                                                              | Department of Ecology and Evolution, University of Lausanne            | Switzerland                                                |
| Genovese, Cristina    | PhD candidate                                                                                                        | University of Hobart (UTAS-IMAS)                                       | Australia                                                  |
| Gensel, Julia         | PhD student in Organic Geochemistry                                                                                  | MARUM - Center for Marine Environmental Sciences, University of Bremen | Germany                                                    |
| Genthon, Christophe   | Research scientist                                                                                                   | Centre National de la Recherche Scientifique                           | France                                                     |
| Gentile, Benjamin     | Graduate student in Molecular Biology (PhD)                                                                          | University of Milwaukee Wisconsin                                      | United States of America (the)                             |
| Genyn, Hanne          | Policy and Advocacy Fellow & Public Health Graduate Student                                                          |                                                                        | United States of America (the)                             |
| George, Amrita        | Research Scientist                                                                                                   | University of Colorado                                                 | United States of America (the)                             |
| George, Marina        | Graduate Assistant                                                                                                   | University of Hawaii at Manoa                                          | United States of America (the)                             |
| George, T. Luke       | Research Associate, Lecturer                                                                                         | Colorado State University                                              | United States of America (the)                             |
| George, Luke          | Adjunct Faculty                                                                                                      | Colorado State University                                              | United States of America (the)                             |
| Georges, Arthur       | Distinguished Professor in Applied Ecology                                                                           | University of Canberra                                                 | Australia                                                  |
| Georgian, Samuel      | Marine Biology                                                                                                       | Marine Conservation Institute                                          | United States of America (the)                             |
| Georgiev, Iskren      | Postdoc                                                                                                              | Max Planck institute for astronomy (MPIA)                              | Germany                                                    |
| Gepts, Paul           | Distinguished Professor, Plant Sciences                                                                              | University of California, Davis                                        | United States of America (the)                             |
| Géraldine, Loot       | Professor Ecology & Biology                                                                                          | University Toulouse III                                                | France                                                     |
| GERANT, Dominique     | Assistant Professor - Tree physiologist                                                                              | Lorraine University                                                    | France                                                     |
| gerard, chantal       |                                                                                                                      | CNRS                                                                   | France                                                     |
| Gerard, Philippa      | Senior Scientist                                                                                                     | AgResearch                                                             | New Zealand                                                |
| Gerard, Jean-François | Researcher - Wildlife Behaviour and Ecology                                                                          | INRA                                                                   | France                                                     |
| GERARD, Bastien       | biologist engineer                                                                                                   | INRA                                                                   | France                                                     |
| GERARD, Pierre        | Lecturer, Evolutionary biology                                                                                       | AgroParisTech                                                          | France                                                     |
| gerbault, muriel      | senior researcher                                                                                                    | Institute for Research and Development                                 | France                                                     |

|                               |                                                     |                                                                                              |                                                            |
|-------------------------------|-----------------------------------------------------|----------------------------------------------------------------------------------------------|------------------------------------------------------------|
| Gerber, AURONA                | MSc Student                                         | University of Pretoria                                                                       | South Africa                                               |
| Gerber, Sophie                | Researcher - Plant genetics & Philosophy of biology | Inra - Université de Bordeaux                                                                | France                                                     |
| Geremew, Amare Gebeyehu       | Olericulturist                                      | RZ                                                                                           | Ethiopia                                                   |
| Gerhardt, Karin               | Researcher sustainable food systems                 | Swedish Biodiversity Centre, Swedish University of Agricultural Sciences                     | Sweden                                                     |
| Gerhartz, Ingo                | doctor philosophiae                                 | JGU Mainz                                                                                    | Germany                                                    |
| Gerli, Cristina               | PhD student / Glaciology                            | Northumbria University                                                                       | United Kingdom of Great Britain and Northern Ireland (the) |
| Germain, Veronique            | assistant professor                                 | university of Bordeaux                                                                       | France                                                     |
| Germain, Marion               | Post Doctoral Research Associate                    | The University of Sheffield                                                                  | United Kingdom of Great Britain and Northern Ireland (the) |
| Gernaat, MD, PhD, Hajo        | Research Associate                                  | Naturalis Biodiversity Center, Leiden                                                        | Netherlands (the)                                          |
| Gerringer, Mackenzie          | Assistant Professor of Biology                      | SUNY Geneseo                                                                                 | United States of America (the)                             |
| Gerstenhöfer, Anna            | Humanmedizin                                        | Phillipsuniversität Marburg                                                                  | Germany                                                    |
| Geschke, Jonas                | Environmental Sciences, Science-Policy              | Museum für Naturkunde Berlin                                                                 | Germany                                                    |
| Geslin, Benoît                | Lecturer in Ecology                                 | IMBE, Aix Marseille Univ, Avignon Université, CNRS, IRD, Marseille, France                   | France                                                     |
| Gessner, Mark O.              | Professor of Applied Aquatic Ecology                | Leibniz Institute of Freshwater Ecology and Inland Fisheries & Technische Universität Berlin | Germany                                                    |
| Getzner, Michael              | Economist, Chair, Institute of Spatial Planning     | Vienna University of Technology (TU Wien)                                                    | Austria                                                    |
| Geuer, Jana                   | Marine Chemist                                      | Alfred Wegener Institute for Polar and Marine Research, Bremerhaven                          | Germany                                                    |
| Gévaudan, Manon               | PhD in Oceanography                                 | LEGOS                                                                                        | France                                                     |
| Ghachoui, Mourad              | Astronomie                                          | Cadi Ayyad University                                                                        | Morocco                                                    |
| Ghali, Karim                  | Phd student in Ecology and Evolution                |                                                                                              | Switzerland                                                |
| Ghan, Steven                  | Climate Scientist                                   |                                                                                              | United States of America (the)                             |
| Ghanate, Avinash              | Postdoctoral Training Fellow                        | The Francis Crick Institute                                                                  | United Kingdom of Great Britain and Northern Ireland (the) |
| Ghasemi, Omidreza             | PhD Candidate                                       | Macquarie University                                                                         | Australia                                                  |
| Gherardi, Jeanne              | Associate Professor                                 | Université Versailles St Quentin / LSCE                                                      | France                                                     |
| Gherardi-Fuentes, Camila      | Marine Biologist                                    | Universidad Austral de Chile                                                                 | Chile                                                      |
| Ghezal, Amina                 | PhD Student in Politics                             | University of Exeter                                                                         | United Kingdom of Great Britain and Northern Ireland (the) |
| Ghilardi, Mattia              | PhD student                                         | Leibniz Centre for Tropical Marine Research                                                  | Germany                                                    |
| Ghirardi, Romina              | Researcher                                          | Instituto Nacional de Limnología (CONICET-UNL)                                               | Argentina                                                  |
| Gholamahmadi, Behrouz         | PhD Student - Environmental Science and Engineering | University of Aveiro                                                                         | Portugal                                                   |
| Ghura, Hiba                   | Phd Student                                         | Max Planck Institute for medical research                                                    | Germany                                                    |
| Giacomin, Leandro             | Professor of Botany                                 | Universidade Federal do Oeste do Pará                                                        | Brazil                                                     |
| Giallongo, Sebastiano         | PhD student in biomedical sciences                  | FNUSA ICRC                                                                                   | Czech Republic (the)                                       |
| Giandoreggio-Barranco, Karine | Engineer assistant                                  | Structural Biology Institute                                                                 | France                                                     |
| Gianeti, Michel               |                                                     | Universidade de São Paulo                                                                    | Brazil                                                     |
| Gianfranceschi, Luca          | Associate Professor, Genetics                       | University of Milan                                                                          | Italy                                                      |

|                         |                                                                          |                                                            |                                                            |
|-------------------------|--------------------------------------------------------------------------|------------------------------------------------------------|------------------------------------------------------------|
| Giannetti, Francesca    | Post doc fellowship                                                      | University of Florence                                     | Italy                                                      |
| Gianni, Fabrizio        | Postdoc - Marine ecology                                                 | OGS                                                        | Italy                                                      |
| Gibb, Gillian           | Genomics                                                                 | Massey University                                          | New Zealand                                                |
| Gibbons, Luke           | Master of Science                                                        | Manchester Metropolitan University                         | United Kingdom of Great Britain and Northern Ireland (the) |
| Gibbs, Allen G.         | Professor, School of Life Sciences                                       | University of Nevada, Las Vegas                            | United States of America (the)                             |
| Gibeau, Pascale         | PhD Candidate, Ecology                                                   | Simon Fraser University                                    | Canada                                                     |
| Gibertoni, Tatiana      | Professor                                                                | Universidade Federal de Pernambuco                         | Brazil                                                     |
| Giblin, Anne            | Senior Scientist                                                         | Marine Biological Laboratory                               | United States of America (the)                             |
| Gibout, Stéphane        | Associate Professor / physics                                            | LaTEP / ENSGTI / UPPA - Pau                                | France                                                     |
| Gibson, Kara            | PhD Student, Biological Sciences                                         | Northern Arizona University                                | United States of America (the)                             |
| Gibson, David           | Professor of Plant Biology                                               | Southern Illinois University Carbondale                    | United States of America (the)                             |
| Gibson, Louise          | Forensics and Biochemistry                                               | Institute of Zoology                                       | United Kingdom of Great Britain and Northern Ireland (the) |
| Gibson, Gary            | Retired biologist                                                        | Ms.                                                        | United States of America (the)                             |
| Gicquel, Morgane        | PhD Student, Behavioural and Evolutionary Ecology                        | Leibniz Institute for Zoo and Wildlife Research (IZW)      | Germany                                                    |
| Gideon, Osia            | Professor in Forestry                                                    | PNG University of Technology                               | Papua New Guinea                                           |
| GIDOIN, Cindy           | Ecology and evolution                                                    | University of Zurich                                       | France                                                     |
| Gielen, Marie-Charlotte | PhD Student in Ecology                                                   | Université Catholique de Louvain                           | Belgium                                                    |
| Gierkink, Max           | Manager - Energy Economics                                               | Institute of Energy Economics at the University of Cologne | Germany                                                    |
| Gierse, Robin           | PhD Student                                                              | Helmholtz Centre for Infection Research (HZI)              | Germany                                                    |
| Giffard, Pierrick       | Oceanographer                                                            | LEGOS                                                      | France                                                     |
| Gignac, Paul            | Associate Professor, Biomedical Sciences                                 | Oklahoma State University Center for Health Sciences       | United States of America (the)                             |
| Gil, Orlando            |                                                                          | Hunter College                                             | United States of America (the)                             |
| Gil, Artur              | Researcher in Remote Sensing and Spatial Planning                        | University of the Azores                                   | Portugal                                                   |
| Gil-Jiménez, Esperanza  | PhD student                                                              |                                                            | Spain                                                      |
| GIL-SANTANA, HÉLCIO     | RESEARCHER/ENTOMOLOGY                                                    | OSWALDO CRUZ INSTITUTE                                     | Brazil                                                     |
| Gilberg, Emma           | Physician / General Practitioner                                         |                                                            | Australia                                                  |
| Gilbert, M. Thomas P.   | Professor of Palaeogenomics                                              | University of Copenhagen                                   | Denmark                                                    |
| Gilbert, Michael        | Honorary Research Associate, Botanist                                    | Royal Botanic Gardens, Kew                                 | United Kingdom of Great Britain and Northern Ireland (the) |
| GILBERT, Daniel         | Professor Microbial Ecology, Peatlands                                   | Université de Bourgogne-Franche-Comté                      | France                                                     |
| Gilchrist, Elizabeth    | Lecturer, Analytical Chemistry                                           | University College Cork                                    | Ireland                                                    |
| Gilder, Thandiwe        | Psychology                                                               | Bangor University                                          | United Kingdom of Great Britain and Northern Ireland (the) |
| Gilfillan, Daniel       | Senior Environmental Specialist / public health and environmental change | International Centre for Environmental Management          | Viet Nam                                                   |
| Gilgert, Wendell        | Stewardship Ecologist                                                    | Point Blue Conservation Science                            | United States of America (the)                             |
| Gill, Brian             | Curator of Land Vertebrates (retired)                                    | Auckland Museum                                            | New Zealand                                                |
| Gill, Jennifer          | Professor of Applied Ecology                                             | University of East Anglia                                  | United Kingdom of Great Britain and Northern Ireland (the) |

|                                   |                                                                        |                                                                                              |                                                            |
|-----------------------------------|------------------------------------------------------------------------|----------------------------------------------------------------------------------------------|------------------------------------------------------------|
| Gill-Pazaris, Lori                | Retired Biologist and Biochemist                                       | Northwestern University                                                                      | United States of America (the)                             |
| Gillanders, Bronwyn               | Professor, Marine Ecology                                              | University of Adelaide                                                                       | Australia                                                  |
| Gillard, Morgane                  | Plant Ecology                                                          |                                                                                              | France                                                     |
| Gillard, Tristan                  | PhD student in informatics                                             | LORIA                                                                                        | France                                                     |
| GILLESPIE, THOMAS                 | Professor                                                              | Emory University                                                                             | United States of America (the)                             |
| Gilless, J.                       | Professor                                                              | University of California, Berkeley                                                           | United States of America (the)                             |
| Gillet, François                  | Professor of Ecology                                                   | University Bourgogne Franche-Comté                                                           | France                                                     |
| Gilli, Gabriella                  | Researcher in Planetary Atmosphere                                     | Institute of Astrophysics and Space Science (IA)                                             | Portugal                                                   |
| Gillikin, David                   | Professor of Geology                                                   | Union College                                                                                | United States of America (the)                             |
| Gillingham, Mark                  | Postdoctoral scientist                                                 | University of Ulm                                                                            | Germany                                                    |
| Gillis, Lucy Gwen                 | Post doctorate, Marine Ecologist                                       | Leibniz Center for Tropical Marine Research                                                  | Germany                                                    |
| Gillman, Len                      | Professor of biogeography                                              | Auckland University of Technology                                                            | New Zealand                                                |
| Gillon, Michael                   | Astrophysicist - FNRS Senior Research Scientist                        | University of Liège                                                                          | Belgium                                                    |
| Gillow, Zoe                       | Clinical Science                                                       | Griffith University                                                                          | Australia                                                  |
| Gills, Barry                      | Professor of Development Studies                                       | University of Helsinki                                                                       | Finland                                                    |
| Gilmore, Shannon                  | Ecologist (MSc)                                                        | Lincoln University                                                                           | New Zealand                                                |
| gilmour, james                    | Coral Reef Ecologist                                                   |                                                                                              | Australia                                                  |
| Gilmour, Sarah                    | Retired plant scientist                                                | Michigan State University                                                                    | United States of America (the)                             |
| Gilra, Aditya                     | Postdoctoral Fellow                                                    | Institute of Science and Technology Austria                                                  | Austria                                                    |
| Giménez, Andrés                   | Professor of Ecology                                                   | Universidad Miguel Hernández                                                                 | Spain                                                      |
| gimona, alessandro                | senior scientist environmental sciences                                | JHI                                                                                          | United Kingdom of Great Britain and Northern Ireland (the) |
| Gindrier, Nicolas                 | PhD student in applied mathematics                                     | Université Grenoble-Alpes                                                                    | France                                                     |
| Gintamo, Tesfaye Tessema          | PhD student, Environmental and Water Sciences                          | University of the Western Cape                                                               | South Africa                                               |
| Gionchetta, Giulia                | Universitat de Girona                                                  | Universitat de Girona                                                                        | Spain                                                      |
| Giordani, Antonio                 | MSc, PhD student from Fall 2019                                        | ACINN (Institute for Atmospheric and Cryospheric Sciences), University of Innsbruck, Austria | Italy                                                      |
| Giordano, M.Carmen                | PhD student in Material Science                                        | EPFL                                                                                         | Switzerland                                                |
| Giordano, Stefano                 | Research scientist                                                     | CNRS                                                                                         | France                                                     |
| GIOVANETTO, LAINE                 | associate professor                                                    | New Jersey City University                                                                   | United States of America (the)                             |
| Giovas, Ioannis                   | Fisheries Director                                                     | iSea, Environmental Organisation for the Preservation of the Aquatic Ecosystems              | Greece                                                     |
| Gipperth, Lena                    | Professor in Environmental law /Director                               | Centre for Sea and Society                                                                   | Sweden                                                     |
| Giraldo, Alan                     | Marine Biologist and Dr. Oceanography                                  | Universidad del Valle                                                                        | Colombia                                                   |
| Giraldo-Perez, Paulina            | PhD student Biological Sciences                                        | The University of Auckland                                                                   | New Zealand                                                |
| Girão Rodrigues de Mello, Natália | PhD researcher                                                         | KU Leuven                                                                                    | Belgium                                                    |
| Girard, Franck                    | Medicine-Neurosciences-Histologie                                      | University of Fribourg                                                                       | Switzerland                                                |
| Giraud, Gael                      | Economist                                                              | CNRS                                                                                         | France                                                     |
| GIRAUD, Michel                    | Fruit Pathology Lab, Plant Health Unity                                | Centre Technique Interprofessionnel des Fruits et Légumes                                    | France                                                     |
| Giraud, Alejandro                 | Researcher of CONICET (Argentina) and Universidad Nacional del Litoral | Instituto Nacional de Limnología (INALI, CONICET-UNL)                                        | Argentina                                                  |

|                        |                                                                |                                                                                            |                                                            |
|------------------------|----------------------------------------------------------------|--------------------------------------------------------------------------------------------|------------------------------------------------------------|
| Giraudoux, Patrick     | Professor of Ecology                                           | University of Franche-Comté                                                                | France                                                     |
| Girling, Robbie        | Associate Professor in Agroecology and Sustainable Agriculture | University of Reading                                                                      | United Kingdom of Great Britain and Northern Ireland (the) |
| Girod, Luc             | Research Engineer, Remote Sensing                              | University of Oslo                                                                         | Norway                                                     |
| Girondot, Marc         | Professor of Ecology                                           | Laboratory Ecology, Systematics, Evolution - University Paris-Saclay, University Paris-Sud | France                                                     |
| Gisbert, Juan          | Associate professor Hydrogeology                               | University of Almeria                                                                      | Spain                                                      |
| Gismann, Jakob         | PhD candidate                                                  | University Groningen                                                                       | Germany                                                    |
| Giudicelli, Francois   | Researcher, Genomics                                           | INSERM                                                                                     | France                                                     |
| Giuliano, Davide       | Environmental biologist                                        | Monviso Natural Park                                                                       | Italy                                                      |
| Giunta, Carmen         | Professor of Chemistry emeritus                                | Le Moyne College                                                                           | United States of America (the)                             |
| GIURFA, Martin         | Full Professor of Neurosciences                                | CNRS - University of Toulouse                                                              | France                                                     |
| Giusti, Matteo         | Research Fellow                                                | Högskolan i Gävle                                                                          | Sweden                                                     |
| Given, David           | Doctor of Pharmacy                                             | University of Texas at Austin                                                              | United States of America (the)                             |
| Givens, Justina        | Researcher                                                     | CNRS (The National Center for Scientific Research)                                         | France                                                     |
| Gkikopoulou, Kalliopi  | Biologists                                                     | University of St Andrews                                                                   | United Kingdom of Great Britain and Northern Ireland (the) |
| Glasgow, Jamie         | Director of Science                                            | Wild Fish Conservancy                                                                      | United States of America (the)                             |
| Glassom, David         | Academic, marine biology                                       | University of KwaZulu-Natal                                                                | South Africa                                               |
| Glémin, Sylvain        | Researcher / Evolutionary biology                              | CNRS                                                                                       | France                                                     |
| Glen, Al               | Wildlife Ecologist                                             | Manaaki Whenua - Landcare Research                                                         | New Zealand                                                |
| Gloerfelt-Tarp, Thomas | Fisheries Scientist                                            |                                                                                            | Denmark                                                    |
| Gloor, Emanuel         | Professor                                                      | University of Leeds                                                                        | United Kingdom of Great Britain and Northern Ireland (the) |
| Glynn, Amanda          | Ph.D. in Geology                                               | Sacramento State                                                                           | United States of America (the)                             |
| Gobbi, Mauro           | Curator / alpine insect ecology                                | MUSE-Science Museum                                                                        | Italy                                                      |
| Gobbin, Tiziana        | PhD in Evolution                                               | University of Bern                                                                         | Switzerland                                                |
| Godbold, Jasmin        | Assistant Professor                                            | University of Southampton                                                                  | United Kingdom of Great Britain and Northern Ireland (the) |
| Goddard, Linda         | Peace and Justice Institute professor                          | Valencia College                                                                           | United States of America (the)                             |
| Godefroid, Sandrine    | Research Scientist - Plant Conservation                        | Meise Botanic Garden                                                                       | Belgium                                                    |
| Godfrey, Jonathan      | Physical Chemistry                                             |                                                                                            | New Zealand                                                |
| Godfrey, Stephanie     | Lecturer in Zoology                                            | University of Otago                                                                        | New Zealand                                                |
| Godin, Philippe        | Veterinarian/PhD Candidate in Physiology of Reproduction       | Université de Montréal                                                                     | Canada                                                     |
| Godin-Beekmann, Sophie | Director of Research in Atmospheric Science                    | CNRS                                                                                       | France                                                     |
| Godinho, Raquel        | Researcher                                                     | CIBIO/InBIO, University of Porto                                                           | Portugal                                                   |
| Godinot, Olivier       | Assistant professor in agronomy                                | Agrocampus Ouest                                                                           | France                                                     |
| Godley, Brendan        | Professor of Conservation Science                              | University of Exeter                                                                       | United Kingdom of Great Britain and Northern Ireland (the) |
| Godoy, José A.         | Scientific Researcher                                          | CSIC                                                                                       | Spain                                                      |
| Godoy, Tomas           | Full professor, Mathematician                                  | Universidad Nacional de Cordoba                                                            | Argentina                                                  |

|                                             |                                                              |                                                                |                                                            |
|---------------------------------------------|--------------------------------------------------------------|----------------------------------------------------------------|------------------------------------------------------------|
| Godoy León, María Fernanda                  | PhD researcher                                               | Ghent University                                               | Chile                                                      |
| Godoy-Faúndez, Alex                         | Associate Professor                                          | Universidad del Desarrollo                                     | Chile                                                      |
| Godoy-Veiga, Milena                         | PhD. student in Dendrochronology                             | Institute of Biosciences at the University of São Paulo        | Brazil                                                     |
| Goerlitz, Holger R.                         | Research Group Leader                                        | Max Planck Institute for Ornithology Seewiesen                 | Germany                                                    |
| Goetghebuer, Tessa                          | Pediatrician                                                 | Free University of Brussels                                    | Belgium                                                    |
| Gogarten, Johann Peter                      | Distinguished Professor of Molecular and Cell Biology        | University of Connecticut                                      | United States of America (the)                             |
| Goh, Sean                                   | Civil Engineering                                            |                                                                | Singapore                                                  |
| Gojska, Agata                               | PhD in Sociology                                             | Institute of Applied Social Sciences, University of Warsaw     | Poland                                                     |
| Golab, Maria J.                             | assistant professor                                          | Institute of Nature Conservation PAS                           | Poland                                                     |
| Golay, Philippe                             | Herpetologist                                                | Elapsoidea                                                     | Switzerland                                                |
| Goldammer, Johann Georg                     | Director                                                     | Global Fire Monitoring Center (GFMC)                           | Germany                                                    |
| Goldberg, Deborah                           | Professor Emerita                                            | University of Michigan                                         | United States of America (the)                             |
| Golden, Christopher                         | Assistant Professor                                          | Harvard TH Chan School of Public Health                        | United States of America (the)                             |
| Golden, Heidi                               | Ecologist                                                    | Woods Hole Research Center                                     | United States of America (the)                             |
| Golden Kroner, Rachel                       | Social Scientist                                             | Conservation International                                     | United States of America (the)                             |
| Goldingay, Ross                             | Wildlife Ecologist                                           | Southern Cross University                                      | Australia                                                  |
| Goldstein, Isaac                            | Graduate Student, Behavioral Psychology                      | Copenhagen Business School                                     | Denmark                                                    |
| Goldstein, Jesse                            | Environmental Data Manager                                   | University of California                                       | United States of America (the)                             |
| Golledge, Nicholas                          | Associate Professor, Glaciology                              | Victoria University of Wellington                              | New Zealand                                                |
| Gollifer, David                             | Agronomist                                                   | Retired                                                        | United Kingdom of Great Britain and Northern Ireland (the) |
| Gollner, Sabine                             | Scientist, Marine Ecology                                    | NIOZ                                                           | Netherlands (the)                                          |
| Golob, Estefania                            | Aquatic Ecologist                                            | WWT                                                            | United Kingdom of Great Britain and Northern Ireland (the) |
| Golubic, MD, PhD, Mladen                    | Medical Director/ Center for Integrative Health and Wellness | University of Cincinnati                                       | United States of America (the)                             |
| Golubov, Jordan                             | Proessor of Ecology                                          | Universidad Autonoma Metropolitana Xochimilco                  | Mexico                                                     |
| Gomes, Daniel                               | Master in Information Science                                | Federal University of Pará                                     | Brazil                                                     |
| Gomes, Vanessa                              | Research                                                     | Instituto Nacional do Semiárido                                | Brazil                                                     |
| Gomes, Maria Cecilia                        |                                                              | Mamirauá Institute for Sustainable Development                 | Brazil                                                     |
| Gomes, Jean Michel                          | Astrophysicist                                               | Instituto de Astrofísica e Ciências do Espaço                  | Portugal                                                   |
| Gomes, Luiz                                 | Professor                                                    | Universidade Estadual de Maringá                               | Brazil                                                     |
| Gomes, Sara                                 | Biologist                                                    | Faculdade de Ciências da Universidade de Lisboa                | Portugal                                                   |
| Gomes da Silva, João                        | Researcher/Astrophysics                                      | Institute of Astronomy and Space Sciences (IA)                 | Portugal                                                   |
| Gomes dos Santos Wendriner Loebmann, Daniel | Scientific analyst                                           | Embrapa                                                        | Brazil                                                     |
| Gomes Rocha, Rita                           | Post-doctoral researcher                                     | CIBIO-InBIO                                                    | Portugal                                                   |
| Gomes Rosa, Ana Margarida                   | Molecular Biology                                            | NZYTech                                                        | Portugal                                                   |
| Gomez, Erika                                | PhD student                                                  | Instituto de Investigaciones Agropecuarias y Forestales, UMSNH | Mexico                                                     |

|                                  |                                                                     |                                                                              |                                                            |
|----------------------------------|---------------------------------------------------------------------|------------------------------------------------------------------------------|------------------------------------------------------------|
| Gomez, Africa                    | Senior Lecturer                                                     | University of Hull                                                           | United Kingdom of Great Britain and Northern Ireland (the) |
| Gómez, Rosa                      | Tenured Professor                                                   | Murcia Universitu                                                            | Spain                                                      |
| Gómez, Nuria                     | Assistant Professor un Economics                                    | Universidad de Castilla-L                                                    | Spain                                                      |
| Gómez, Tomás                     | Director of FIIBAP                                                  | Primary Care Research Foundation of Madrid                                   | Spain                                                      |
| Gomez Crespo, Bibiana            | Senior researcher                                                   | Norwegian institute for water research                                       | Norway                                                     |
| Gómez Galindo, Alma Adrianna     | Researcher in Science Education                                     | CINVESTAV Monterrey                                                          | Mexico                                                     |
| Gomez Gras, Daniel               | PhD candiate                                                        | Institut de Ciències del Mar (ICM-CSIC)                                      | Spain                                                      |
| Gómez-Creutberg, Carla           | Geographer                                                          | University of Canterbury                                                     | New Zealand                                                |
| Gómez-Paredes, Jorge             | Ph.D. Energy Science                                                | Duke Universtiy & Yachay Tech University                                     | Ecuador                                                    |
| Gomez-Ramos, Pilar               | Retired University professor                                        | Univ Autonoma of Madrid                                                      | Spain                                                      |
| Gómez-Serrano, Miguel Angel      | Biologist                                                           | VAERSA-Generalitat Valenciana                                                | Spain                                                      |
| Gomis, Damià                     | Professor of Physics of the Earth                                   | University of the Balearic Islands                                           | Spain                                                      |
| Gomis-Rüth, F. Xavier            | Professor                                                           | Molecular Biology Institute of Barcelona (CSIC)                              | Spain                                                      |
| Goncalves, Priscila              | Postdoctoral fellow                                                 | University of Exeter                                                         | United Kingdom of Great Britain and Northern Ireland (the) |
| Goncalves, Leandra               | Researcher                                                          | University of Sao Paulo                                                      | Brazil                                                     |
| Gonçalves, Duarte Vasconcelos    | Post-Doc, Biological sciences                                       | CIIMAR, University of Porto                                                  | Portugal                                                   |
| Gonçalves, Ana                   | Post-doctoral Researcher in Plant Physiology                        | University of São Paulo                                                      | Brazil                                                     |
| Gonçalves, Helena                |                                                                     | MHNC-UP                                                                      | Portugal                                                   |
| Gonçalves, David                 | Assistant Professor, Conservation Biology                           | CIBIO/InBIO Associated Laboratory & Faculty of Sciences. University of Porto | Portugal                                                   |
| Gonçalves, Emanuel               | Associate Professor                                                 | ISPA-Instituto Universitário                                                 | Portugal                                                   |
| Gonçalves de Andrade, Rute Maria | Scientific Research / Biology, Public Healty, Environmental Science | Fundação Museu do Homem Americano                                            | Brazil                                                     |
| Gonçalves-Souza, Thiago          | Faculty                                                             | Universidade Federal Rural de Pernambuco                                     | Brazil                                                     |
| Gondrand, Corentin               | Postdoctoral researcher in chemical biology                         | Max-Planck Institute for medical research                                    | Germany                                                    |
| Gonen, Lilah                     | Graduate Research Assistant                                         | Oregon State University                                                      | United States of America (the)                             |
| Gonev, Andrej                    | Ecologist                                                           | Ss. Cyril and Methodius University, Skopje                                   | Macedonia, Republic of (the former Yugoslavia)             |
| Gonzague, agez                   | assistant professor                                                 | Université Toulouse 3                                                        | France                                                     |
| Gonzalez, Leticia                | Biochemist, PhD in Biochemistry                                     | Pontificia Universidad Catolica de Chile                                     | Chile                                                      |
| Gonzalez, Jose L.                | Agriculture                                                         | CSIC                                                                         | Spain                                                      |
| Gonzalez, Patrick                | Associate Adjunct Professor, climate change                         | University of California, Berkeley                                           | United States of America (the)                             |
| Gonzalez, Mauro                  | Forest Ecology                                                      | Universidad Austral de Chile                                                 | Chile                                                      |
| Gonzalez, Melissa                | Marine Biology                                                      | Coral Reef Management Fellow                                                 | Puerto Rico                                                |
| Gonzalez, Adrian                 | Associate Lecturer in Human Geography and Environment               | University of York                                                           | United Kingdom of Great Britain and Northern Ireland (the) |
| Gonzalez, Elizabeth              | Astronomy                                                           | IATE                                                                         | Argentina                                                  |
| Gonzalez, Georges                | Ethologist                                                          | CEFS-INRA                                                                    | France                                                     |
| GONZALEZ, Georges                | researcher in non human ethology                                    | National institute of research on agronomy and environment (INRAe)           | France                                                     |

|                                  |                                                             |                                                                                                         |                                                               |
|----------------------------------|-------------------------------------------------------------|---------------------------------------------------------------------------------------------------------|---------------------------------------------------------------|
| González, Aridane G.             | Postdoctoral Researcher                                     | Instituto de Oceanografía y Cambio Global (IOCAG),<br>Universidad de Las Palmas de Gran Canaria (ULPGC) | Spain                                                         |
| González, Leydianis              | Biologist                                                   | Instituto de Ciencias Médicas                                                                           | Panama                                                        |
| González, Luís                   | Associate Profesor Plant Physiology                         | University of Vigo                                                                                      | Spain                                                         |
| González - Sanchis, María        | Assistant professor                                         | Universitat Politecnica de Valencia                                                                     | Spain                                                         |
| González Carballo, Marta         | Marine Biologist                                            | Observatorio Ambiental Granadilla                                                                       | Spain                                                         |
| Gonzalez Forero, Manuela         | Ecological Research                                         | Estación Biológica de Doñana (Consejo Superior de<br>Investigaciones Científicas)                       | Spain                                                         |
| Gonzalez Grandio, Eduardo        | Plant Molecular Biology postdoctoral researcher             | UC Berkeley                                                                                             | United States of America (the)                                |
| Gonzalez pelayo, Oscar           | Researcher soil science                                     | Universidade de Aveiro                                                                                  | Portugal                                                      |
| Gonzalez Plaza, Juan Jose        | Postdoctoral Researcher                                     | Faculty of Forestry and Wood Sciences, Czech<br>University of Life Sciences                             | Czech Republic (the)                                          |
| González Reyes, Luis             | doctor in Chemistry                                         |                                                                                                         | Spain                                                         |
| González Rodarte, Jantai Aquiles | Geophysics and Technology                                   | National Autonomous University of Mexico                                                                | Mexico                                                        |
| Gonzalez Santana, Andres         | MSCA postdoctoral fellow - Glycochemistry                   | CSIC                                                                                                    | Spain                                                         |
| González Sevilleja, Cristina     | Nature Conservation                                         | De Vlinderstichting, Dutch Butterfly Conservation                                                       | Netherlands (the)                                             |
| Gonzalez Svatetz, Carlos A.      | Senior research in epidemiology and nutrition               | Catalan Institute of Oncology                                                                           | Spain                                                         |
| González-Acuña, Daniel           | Vet                                                         | Universidad de Concepción                                                                               | Chile                                                         |
| González-Barrientos, Javier      | Doctor (c) en Ciencias Silvoagropecuarias y<br>Veterinarias | Universidad de Chile                                                                                    | Chile                                                         |
| González-Benítez, Natalia        | Microbiology                                                | University Rey Juan Carlos                                                                              | Spain                                                         |
| González-Bernardo, Enrique       | PhD Student                                                 | CSIC                                                                                                    | Spain                                                         |
| Gonzalez-Caro, Sebastian         | PhD Student                                                 | Universidad Nacional de Colombia                                                                        | Colombia                                                      |
| Gonzalez-Chang, Mauricio         | Assistant Professor in Agroecology                          | Universidad de Aysén                                                                                    | Chile                                                         |
| Gonzalez-Eguino, Mikel           | Research Professor                                          | BC3 Baque Centre for Climate Change                                                                     | Spain                                                         |
| González-Gaudiano, Edgar         | Researcher in climate change education                      | Universidad Veracruzana                                                                                 | Mexico                                                        |
| González-Ittig, Raúl             | Researcher and Professor                                    | IDEA (Conicet-UNC, Argentina)                                                                           | Argentina                                                     |
| Gonzalez-Lagos, Cesar            | Associated researcher                                       | Universidad Bernardo O' Higgins & CAPES                                                                 | Chile                                                         |
| González-Maya, José F.           | Scientific Director                                         | ProCAT Colombia                                                                                         | Colombia                                                      |
| González-Pérez, Jose A.          | Senior Scientist, Biogeochemist                             | Spanish Council for Scientific Research (IRNAS-CSIC)                                                    | Spain                                                         |
| González-Reyes, Acaimo           | Professor of Research                                       | Spanish National Research Council                                                                       | Spain                                                         |
| González-Rodríguez, Antonio      | Researcher                                                  | Universidad Nacional Autónoma de México                                                                 | Mexico                                                        |
| González-Varo, Juan Pedro        | Ecologist                                                   | Universidad de Oviedo                                                                                   | Spain                                                         |
| González-Viñas, Wenceslao        | Associate Professor                                         | University of Navarra                                                                                   | Spain                                                         |
| Gonzalez-Pelayo, Oscar           | researcher in environmental sciences                        | CESAM University of Aveiro, Portugal                                                                    | Portugal                                                      |
| Good, Kelly                      | Civil & Environmental Engineering                           |                                                                                                         | United States of America (the)                                |
| Good, Spencer                    | rangeland research technician                               |                                                                                                         | United States of America (the)                                |
| Goodchild, Anthony               | Veterinary Epidemiologist                                   | Animal and Plant Health Agency                                                                          | United Kingdom of Great Britain<br>and Northern Ireland (the) |
| Goodenough, Jessica              | Geography PhD student                                       | University of Reading                                                                                   | United Kingdom of Great Britain<br>and Northern Ireland (the) |
| Goodman, Peter                   | Wildlife and Conservation Ecologist                         | Retired                                                                                                 | South Africa                                                  |

|                           |                                                                        |                                                                              |                                                            |
|---------------------------|------------------------------------------------------------------------|------------------------------------------------------------------------------|------------------------------------------------------------|
| Goodman, Roger            | Bachelor of Science in Climate Change Management                       | Murdoch University                                                           | Australia                                                  |
| Goodwin, Cecily           | Research Associate, Disease Ecology                                    | University of Exeter                                                         | United Kingdom of Great Britain and Northern Ireland (the) |
| Gopakumar, Anjali         | Student currently doing her Master in Marine Biology                   | Ghent University                                                             | Belgium                                                    |
| Gopalasingam, Piraveen    | Scientific training officer / Life sciences                            | EMBL-EBI                                                                     | United Kingdom of Great Britain and Northern Ireland (the) |
| Gopaul, Sunil             | Environmental and Social Safeguards Coordinator, Environmental Science | Central Housing and Planning Authority                                       | Guyana                                                     |
| Gorchov, David            | professor                                                              | Miami University                                                             | United States of America (the)                             |
| Gorczak, Michał           |                                                                        | University of Warsaw                                                         | Poland                                                     |
| Gordo, Oscar              | Researcher / Ecology                                                   |                                                                              | Spain                                                      |
| Gordon, Timothy           | PhD researcher in marine biology                                       | University of Exeter                                                         | United Kingdom of Great Britain and Northern Ireland (the) |
| Gordon, Ascelin           | Senior Research Fellow                                                 | RMIT University                                                              | Australia                                                  |
| Gordon, Iain              | Deputy Vice Chancellor                                                 | James Cook University                                                        | Australia                                                  |
| Gordon, Melita            | Professor                                                              | University of Liverpool                                                      | United Kingdom of Great Britain and Northern Ireland (the) |
| Gorelik, Seth             | Researcher Assistant in Aboveground Carbon Dynamics                    | Woods Hole Research Center                                                   | United States of America (the)                             |
| Gori, Andrea              | Associate Professor                                                    | Università del Salento                                                       | Italy                                                      |
| Gorissen, Dr Sarsha       | Wildlife Ecologist                                                     |                                                                              | Australia                                                  |
| Görner, Marius            | PhD student, neuroscience                                              | Hertie Institute for Clinical Brain Science                                  | Germany                                                    |
| Gortazar, Christian       | Professor/Animal Health                                                | Universidad de Castilla-La Mancha                                            | Spain                                                      |
| Gorzalka, Philip          | PhD student                                                            | German Aerospace Center (DLR)                                                | Germany                                                    |
| Gossa, Mesfin Wondafrash  | Postdoctoral Research Fellow, Entomology                               | FABI, University of Pretoria                                                 | South Africa                                               |
| Gosselin, Romain-Daniel   | Biology, pathology                                                     | Lausanne University Hospital (CHUV)                                          | Switzerland                                                |
| Gossenberger, Florian     | Theoretical Chemistry                                                  |                                                                              | Germany                                                    |
| Gossens, Richard          | Doctoral student                                                       | University of Helsinki                                                       | Finland                                                    |
| Gossiaux, Alice           | PhD Student                                                            | Université de Lorraine                                                       | France                                                     |
| Gosztonyi, Susanne        | Lecturer, Researcher in energy and building constructions              | Lucerne University of Applied Sciences and Arts                              | Switzerland                                                |
| Gotanda, Kiyoko           | Postdoctoral Fellow/Evolution and Behaviour                            | University of Cambridge                                                      | United Kingdom of Great Britain and Northern Ireland (the) |
| Gotfredsen, Anne Birgitte | Part time lecturer, Ph.d. Biology                                      | Globe Institute, University of Copenhagen                                    | Denmark                                                    |
| Götmark, Frank            | Professor, Ecology                                                     | University of Gothenburg                                                     | Sweden                                                     |
| Götmark, Elin             | Associate Professor of Mathematics                                     | Mathematical Sciences, Chalmers University of Technology/Göteborg University | Sweden                                                     |
| Gottlieb, Nora            | Research associate, Dept of Health Care Management                     | Technical University Berlin                                                  | Germany                                                    |
| Gottlieb, Avi             |                                                                        | Tel Aviv University                                                          | Israel                                                     |
| Gottsberger, Richard      | ecologist /molecular biologist                                         |                                                                              | Austria                                                    |
| Gottschall, Felix         | Doctoral researcher in soil ecology                                    | German Centre for Integrative Biodiversity Research (iDiv)                   | Germany                                                    |

|                              |                                                        |                                                                                  |                                                            |
|------------------------------|--------------------------------------------------------|----------------------------------------------------------------------------------|------------------------------------------------------------|
| Goudet, Jerome               | Professor, population genetics                         | University of Lausanne                                                           | Switzerland                                                |
| Goudreault, Felix            | PhD student in Condensed Matter Physics                | Universite de Montreal                                                           | Canada                                                     |
| GOUIN-BOURDEILH, Charles     | Medical Student                                        | University of Bordeaux                                                           | France                                                     |
| Gould, Mark                  | Chemistry                                              |                                                                                  | Australia                                                  |
| Gould, Sven                  | Associate Prof for Evolutionary Cell Biology           | HHU Düsseldorf                                                                   | Germany                                                    |
| Gould, Liz                   | Principal Scientist                                    | Healthy Land and Water                                                           | Australia                                                  |
| Goulson, Dave                | Professor of Biology                                   | University of Sussex                                                             | United Kingdom of Great Britain and Northern Ireland (the) |
| Gounand, Isabelle            | Postdoc in Ecology                                     | University of Zürich / Eawag                                                     | Switzerland                                                |
| GOURDAIN, Philippe           | Head of biodiversity partnerships unit                 | National Museum of Natural History of Paris                                      | France                                                     |
| Gourguet, Sophie             | Researcher                                             | Ifremer                                                                          | France                                                     |
| gourlan, alexandra           | Lecturer/scientist                                     | UGA                                                                              | France                                                     |
| Gourlay, Philippe            | Wildlife veterinarian and epidemiologist               | Oniris - Wildlife Health Centre                                                  | France                                                     |
| Gourlez de la Motte, Louis   | Post Doc Researcher                                    | University of Liege                                                              | Belgium                                                    |
| Gouwakinnou, Gérard N.       | Assistant Professor / Conservation Biology             | Laboratory of Ecology, Botany and Plant Biology (LEB), Université de Parakou     | Benin                                                      |
| Gouws, Jeanne                | Freshwater Ecologist                                   | CapeNature (conservation agency)                                                 | South Africa                                               |
| Gouy, Alexandre              | Population genetics                                    | University of Bern                                                               | Switzerland                                                |
| Gouyon, Pierre-Henri         | Professor of Systematics & Evolution                   | Museum National d'Histoire Naturelle de Paris                                    | France                                                     |
| Govers, Laura                | Assistant Professor in Marine Conservation Ecology     | University of Groningen   NIOZ                                                   | Netherlands (the)                                          |
| Goward, Trevor               | lichenologist                                          | University of British Columbia                                                   | Canada                                                     |
| Gowdy, John Malcolm          | Professor of Economics, Emeritus                       | Rensselaer Polytechnic Institute                                                 | United States of America (the)                             |
| Gower, Graham                | Postdoc in genetics and evolution                      | University of Copenhagen                                                         | Denmark                                                    |
| Gowrappan, Muthusankar       | Head of GIS Projects                                   | French Institute of Pondicherry                                                  | India                                                      |
| Goya Grocin, Andrea          | PhD student in Chemical Biology                        | Imperial College London                                                          | United Kingdom of Great Britain and Northern Ireland (the) |
| Goyal, Akshit                |                                                        | Massachusetts Institute of Technology                                            | United States of America (the)                             |
| Goyet, Sophie                | Epidemiologist                                         | Independent researcher                                                           | France                                                     |
| Goymann, Wolfgang            | Behavioural Ecology                                    | Max-Planck-Institute for Ornithology                                             | Germany                                                    |
| Graber, Marianne             | Professor in Biochemistry                              | CNRS UMR LIENSs university of La Rochelle                                        | France                                                     |
| Gräbin, Diogo                | Biologist                                              | Universidade Estadual de Santa Cruz                                              | Brazil                                                     |
| Grabowska, Katarzyna         | PhD in Physics                                         | University of Warsaw                                                             | Poland                                                     |
| Grabowski, Zbigniew          | Postdoctoral Researcher and Instructor, Geography      | Cary Institute of Ecosystem Studies / The New School / Portland State University | United States of America (the)                             |
| Graça, Manuel                | Ecology                                                | MARE & University of Coimbra                                                     | Portugal                                                   |
| Grace, Jaime                 | Assistant Professor of Biology                         | Bradley University                                                               | United States of America (the)                             |
| Graef, Federico              | Professor, Physical Oceanography                       | CICESE                                                                           | Mexico                                                     |
| Graeff, Moritz               | Postdoctoral researcher in Plant Developmental Biology | University of Lausanne                                                           | Switzerland                                                |
| Graf, Martin                 | Environmental Systems Scientist                        | Helmholtz Center of Environmental Research - UFZ                                 | Germany                                                    |
| Graf, Rupert                 | Researcher / Refrigeration Engineering                 | Technische Universität Berlin                                                    | Germany                                                    |
| Graf von Reventlow, Heinrich | Clinical Psychology                                    | Self employed                                                                    | Germany                                                    |

|                            |                                                                   |                                                                             |                                                            |
|----------------------------|-------------------------------------------------------------------|-----------------------------------------------------------------------------|------------------------------------------------------------|
| Grafius, Darren            | Postdoctoral Research Associate in environmental geography        | University of Sheffield                                                     | United Kingdom of Great Britain and Northern Ireland (the) |
| Grafmüller, Jannis         | Masters student in Chemical Engineering/Process Engineering       | KIT                                                                         | Germany                                                    |
| Gräfnings, Max             | Environmental Marine Biology                                      |                                                                             | Finland                                                    |
| Graham, William            | Marine Biologist                                                  | ITESM and Bachillerato Anahuac                                              | Mexico                                                     |
| Graham, Linda              | Professor of Botany                                               | University of Wisconsin-Madison                                             | United States of America (the)                             |
| Graham, Stephen            | Professor of International Child Health                           | University of Melbourne                                                     | Australia                                                  |
| Graham, John               | Geologist                                                         | Colorado State University                                                   | United States of America (the)                             |
| Graham, John               | Natural Resources and Environment                                 | Lake Superior State University                                              | United States of America (the)                             |
| Graham, Christopher        | Biomedical Science                                                | University of Queensland                                                    | Australia                                                  |
| Graham, Samuel             | Organic Chemistry                                                 | Retired                                                                     | United States of America (the)                             |
| Graham, Christopher        | Master of Public Health (MPH) Student                             | University of Manchester                                                    | United Kingdom of Great Britain and Northern Ireland (the) |
| Graïc, Jean-Marie          | Veterinary Anatomy and Neuroanatomy                               | University of Padova                                                        | Italy                                                      |
| Grainger, Matthew          | Post-doctorial Fellow wildlife management and conservation        | Norwegian Institute for Nature Research                                     | Norway                                                     |
| Gram, Wendy                | Ecologist and Program Manager                                     | University Corporation for Atmospheric Research (UCAR)                      | United States of America (the)                             |
| Grams, Thorsten            | Professor                                                         | Technical University of Munich                                              | Germany                                                    |
| Granado-Lorencio, Carlos   | Profesor                                                          | University of Sevilla                                                       | Spain                                                      |
| Granados, Ignacio          | Biologist - Aquatic ecology                                       | Sierra de Guadarrama National Park                                          | Spain                                                      |
| Granados, Alys             | Ecology                                                           |                                                                             | Canada                                                     |
| Granda, Elena              | Postdoctoral researcher                                           | University of Alcalá                                                        | Spain                                                      |
| Grandcolas, Philippe       | Senior Scientist, Head of Institute, Evolutionary Biology         | Centre National pour la Recherche Scientifique (CNRS)                       | France                                                     |
| Grande, Juan Manuel        | Researcher                                                        | INCITAP-CONICET-UNLPam/CECARA-FCEyN-UNLPam                                  | Argentina                                                  |
| Grande, Terry              | Professor/Biology                                                 | Loyola University Chicago                                                   | United States of America (the)                             |
| Grande Allende, José Ramón | Professor, Systematic Botany and Ecology                          | Herbario MERF, Facultad de Farmacia y Bioanálisis, Universidad de Los Andes | Venezuela (Bolivarian Republic of)                         |
| Grandia, Liza              | cultural anthropologist, Associate Professor                      | UC Davis                                                                    | United States of America (the)                             |
| Grange, Marie              | PhD student in ecology                                            | LECA (CNRS)                                                                 | France                                                     |
| Grange, Thierry            | Research Director, Paleogenomics                                  | Institut Jacques Monod, CNRS, University Paris                              | France                                                     |
| Graniszewska, Maja         | Phd/Biology                                                       | University of Warsaw                                                        | Poland                                                     |
| Granitzer, Michael         | Prof. for Computer Science                                        | University of Passau                                                        | Germany                                                    |
| Granjon, Laurent           | Researcher                                                        | IRD                                                                         | France                                                     |
| Granot, Jonathan           | Professor of Physics                                              | Open University of Israel                                                   | Israel                                                     |
| Granot, Itai               | PhD candidate, Ecology                                            | Tel Aviv University                                                         | Israel                                                     |
| Grant, John                | Research Fellow                                                   | Southern Cross University                                                   | Australia                                                  |
| Grantz, David              | Plant Physiologist and Extension Air Quality Specialist, Emeritus | University of California at Riverside                                       | United States of America (the)                             |

|                        |                                                             |                                                                                               |                                                            |
|------------------------|-------------------------------------------------------------|-----------------------------------------------------------------------------------------------|------------------------------------------------------------|
| Graser, Laura          | PhD student for Functional Nanomaterials                    | University of Bristol                                                                         | United Kingdom of Great Britain and Northern Ireland (the) |
| Grass, Ingo            | Postdoctoral researcher in Agroecology                      | University of Göttingen                                                                       | Germany                                                    |
| Grasset, Charlotte     | Postdoctoral researcher, aquatic biogeochemistry            | Uppsala University                                                                            | Sweden                                                     |
| Grasso, Donato A.      | Professor of Zoology                                        | Department of Chemistry, Life Sciences and Environmental Sustainability - University of Parma | Italy                                                      |
| Grate, John            | Chemist, Biotechnologist                                    |                                                                                               | United States of America (the)                             |
| Gratiot, Nicolas       | Sediment geomorphologist                                    | Institut de Recherche pour le Développement                                                   | Viet Nam                                                   |
| Grau, Matthew          | Postdoctoral Researcher - Physics                           | ETH Zurich                                                                                    | Switzerland                                                |
| Graulich, Cora Michal  |                                                             | Staatliches Museum für Naturkunde Stuttgart                                                   | Germany                                                    |
| Gravend-Tirole, Xavier | PhD, Independent researcher                                 |                                                                                               | Switzerland                                                |
| Graves, William        | Senior Biological Scientist                                 | Univ. of Florida                                                                              | United States of America (the)                             |
| Graves, David          | Chemical Engineering                                        | University California at Berkeley                                                             | United States of America (the)                             |
| Gray, Gary             | Retired Biochemist                                          | UMO and The Upjohn Company                                                                    | United States of America (the)                             |
| Gray, Michael          | Dr                                                          | Newcastle University                                                                          | United Kingdom of Great Britain and Northern Ireland (the) |
| Gray, Randall          | Wildlife Biologist                                          |                                                                                               | United States of America (the)                             |
| Gray, Susan            | Environmental Scientist MSc FRGS MRSB                       | University of London Birkbeck College                                                         | United Kingdom of Great Britain and Northern Ireland (the) |
| Graziani, Natalia      | PhD student (biology)                                       | IMBIV-CONICET                                                                                 | Argentina                                                  |
| Grazioso, Kathryn      | Tropical Marine Ecosystem Science                           | University of Miami                                                                           | United States of America (the)                             |
| Gréau, Yoann           | Research Associate - Geochemistry                           | Macquarie University                                                                          | Australia                                                  |
| Greco, Ilaria          | PhD student                                                 | University of Florence                                                                        | Italy                                                      |
| Green, Leon            | PhD Candidate in Evolutionary Ecology                       | Department of Biology and Environmental Science, University of Gothenburg                     | Sweden                                                     |
| Green, Nicola          | PhD student                                                 | Bournemouth University                                                                        | United Kingdom of Great Britain and Northern Ireland (the) |
| Green, Andrew John     | Professor of Research                                       | Consejo Superior de Investigaciones Cientificas                                               | Spain                                                      |
| Green, Gabrielle       | Medical Doctor and PhD                                      | University of Oxford                                                                          | United Kingdom of Great Britain and Northern Ireland (the) |
| Green, Peter           | Geology - retired                                           | University of Sydney                                                                          | Australia                                                  |
| Green, Madeline        | Scientist/ Marine Biology                                   | University of Tasmania                                                                        | Australia                                                  |
| Green, Paige           | PhD candidate in Marine Ecology                             | Institute for Marine and Antarctic Studies                                                    | Australia                                                  |
| Green, David           | PhD student - Marine and Antarctic Science                  | University of Tasmania                                                                        | Australia                                                  |
| Green, Jemma           | Conservation biologist                                      | University of Victoria                                                                        | Canada                                                     |
| Greenaway, Elinor      | Forest Ecologist                                            | PA DCNR BOF                                                                                   | United States of America (the)                             |
| Greenberg, Liana       | Plant Science                                               | Wageningen University                                                                         | Netherlands (the)                                          |
| Greenspan, Sasha       | Postdoctoral researcher in amphibian disease ecology        | University of Alabama                                                                         | United States of America (the)                             |
| Greenville, Aaron      | Lecturer in Spatial Agricultural and Environmental Sciences | University of Sydney                                                                          | Australia                                                  |
| Greenwood, Leanne      | PhD student                                                 | Charles Sturt University                                                                      | Australia                                                  |
| Greer, Gary            | Professor, Biology (Plant Ecology)                          | Grand Valley State University                                                                 | United States of America (the)                             |

|                           |                                                 |                                                                 |                                                            |
|---------------------------|-------------------------------------------------|-----------------------------------------------------------------|------------------------------------------------------------|
| gregg, jillian            | PhD Instructor                                  | Oregon State University                                         | United States of America (the)                             |
| Gregoracci, Gustavo       | Professor Adjunto in Environmental Microbiology | UNIFESP                                                         | Brazil                                                     |
| Grégori, Gerald           | Researcher                                      | CNRS                                                            | France                                                     |
| Gregory, Ph.D., Robert J. | Retired Academic                                |                                                                 | Australia                                                  |
| Greguš, Jan               | gynecologist, philosopher                       | Center for Outpatient Gynecology; Center for Prenatal Diagnosis | Czech Republic (the)                                       |
| Greilhuber, Irmgard       | University Professor                            | University of Vienna                                            | Austria                                                    |
| Greilinger, Marion        | Environmental Meteorology                       | Zentralanstalt für Meteorologie und Geodynamik (ZAMG)           | Austria                                                    |
| Grella, Stephanie         | Post doc                                        | Boston University                                               | United States of America (the)                             |
| Grellier, Séraphine       |                                                 | University of Tours UMR7324 CNRS                                | France                                                     |
| Gren, Eric                | Biology Professor                               | University of Montana                                           | United States of America (the)                             |
| Grenet, Thierry           | Physicist                                       | Institut Néel CNRS                                              | France                                                     |
| Grenier, Stéphane         | Researcher                                      | CNRS                                                            | France                                                     |
| Grenier, Mélanie          | Independant researcher                          |                                                                 | France                                                     |
| Grennerat, Vincent        | Electrical engineering teacher                  | IUT1 - UGA                                                      | France                                                     |
| Grenouillet, Gaël         | Associate Professor                             | Lab EDB, Université Paul Sabatier Toulouse 3                    | France                                                     |
| Grether, Gregory          | Professor                                       | UCLA                                                            | United States of America (the)                             |
| Grether, Greg             | Professor of Biology                            | UCLA                                                            | United States of America (the)                             |
| Grey, Louise              | Veterinary surgeon                              | University of Sydney, BCSc Hons                                 | Australia                                                  |
| Griebeler, Eva Maria      | Professur, Ecology and Evolution                | University of Mainz, iomE, Evolutionary Ecology                 | Germany                                                    |
| Griebler, Christian       | Head of Division of Limnology                   | University of Vienna                                            | Austria                                                    |
| GRIECO, Elisa             | Researcher                                      | Foundation CMCC                                                 | Italy                                                      |
| Grieger, Khara            | Senior Research Scholar                         | North Carolina State University                                 | United States of America (the)                             |
| Griese, Julia             | Assistant Professor, Structural Biology         | Uppsala University                                              | Sweden                                                     |
| Grieshop, Andrew          | Associate Professor, Environmental Engineering  | North Carolina State University                                 | United States of America (the)                             |
| Griffith, Gary            | Research Scientist Complex Adaptive Systems     | Norwegian Polar Institution                                     | Norway                                                     |
| Griffiths, Bronwen        | Environmental Scientist                         | Independent Freelancer                                          | South Africa                                               |
| Griffiths, Adrienne       | Sociology Graduate Student                      | University of Utah                                              | United States of America (the)                             |
| Grigg, Jennifer           | PhD Researcher - Marine Ecology                 | University of Exeter                                            | United Kingdom of Great Britain and Northern Ireland (the) |
| Grilo, Clara              | Researcher                                      | Cesam, University of Lisbon                                     | Portugal                                                   |
| Grimm, Helmut             | PhD, Biologist, ecology                         | retired                                                         | Germany                                                    |
| Grimsley, Nigel           | Research Director                               | CNRS and Sorbonne University                                    | France                                                     |
| Grimstead, Deanna         | Assistant Professor                             | Ohio State University                                           | United States of America (the)                             |
| Grinath, Joshua           | Visiting Assistant Professor                    | Idaho State University                                          | United States of America (the)                             |
| Grinberg, Maurice         | Assoc. Prof.                                    | New Bulgarian University                                        | Bulgaria                                                   |
| Gringinger, Peter         | Environmental and Geosciences                   |                                                                 | Austria                                                    |
| Grinman, Diego            | Postdoc                                         | Universidad de Buenos Aires                                     | Argentina                                                  |
| Grinspoon, David          | Senior Scientist                                | Planetary Science Institute                                     | United States of America (the)                             |
| Gripp, Anderson           | Post-Doc                                        | NUPEM-UFRJ                                                      | Brazil                                                     |

|                         |                                                                            |                                                                            |                                                            |
|-------------------------|----------------------------------------------------------------------------|----------------------------------------------------------------------------|------------------------------------------------------------|
| Grisel, Yann            | Mathematics teacher                                                        | Université Toulouse 3                                                      | France                                                     |
| Grobler, B. Adriaan     | Plant Ecologist                                                            | Nelson Mandela University                                                  | South Africa                                               |
| Groenendijk, Jessica    | Communications Coordinator, Biologist                                      | San Diego Zoo Global Peru                                                  | Peru                                                       |
| Groenteman, Ronny       | Weed biocontrol                                                            |                                                                            | New Zealand                                                |
| Grogan, Paul            | Professor of Plant and Terrestrial Ecosystem Ecology                       | Queen's University                                                         | Canada                                                     |
| Groh, Ksenia            | Scientific Communication Officer, food contact chemicals and health        | Food Packaging Forum Foundation                                            | Switzerland                                                |
| Gronewold, Nadine       | Psychologist                                                               | University hospital Heidelberg                                             | Germany                                                    |
| Groom, Martha           | Professor of Biodiversity Conservation                                     | University of Washington Bothell and University of Washington              | United States of America (the)                             |
| Groome, Giles           | Ecologist                                                                  |                                                                            | United Kingdom of Great Britain and Northern Ireland (the) |
| Groot, Astrid           | Professor Population and Evolutionary Biology                              | Institute for Biodiversity and Ecosystem Dynamics, University of Amsterdam | Netherlands (the)                                          |
| Grootswagers, Tijn      | Postdoctoral Research Fellow in Cognitive Neuroscience                     | University of Sydney                                                       | Australia                                                  |
| Gros-Balthazard, Muriel | Evolutionary biologist                                                     | New York University Abu Dhabi                                              | United Arab Emirates (the)                                 |
| Grosbois, Guillaume     | Postdoctoral Researcher in Aquatic Ecology                                 | Université du Québec à Chicoutimi                                          | Canada                                                     |
| Gross, Louis            | Chancellor's Professor of Ecology and Evolutionary Biology and mathematics | University of Tennessee                                                    | United States of America (the)                             |
| Gross, Nicolas          | Researcher                                                                 | INRA                                                                       | France                                                     |
| Groß, Carla             | Energy Expert for energy efficiency                                        | no                                                                         | Germany                                                    |
| Grossart, Hans-Peter    | Professor, Aquatic Microbial Ecology                                       | Leibniz Institute of Freshwater Ecology and Inland Fisheries (IGB)         | Germany                                                    |
| Große, Fabian           | Research Associate, Marine Modeling                                        | University of Strathclyde                                                  | United Kingdom of Great Britain and Northern Ireland (the) |
| Grosser, Stefanie       | Postdoctoral Fellow in Conservation Genomics                               | University of Otago                                                        | New Zealand                                                |
| Grossi, Vincent         | Research Director                                                          | CNRS                                                                       | France                                                     |
| Großkinsky, Dominik     | Research Engineer, Bioresources/Plant Science                              | AIT Austrian Institute of Technology                                       | Austria                                                    |
| Grossman, Gary          | Professor of Animal Ecology                                                | University of Georgia                                                      | United States of America (the)                             |
| Grossman, Richard       | Affiliate Faculty, Department of Biology                                   | Fort Lewis College                                                         | United States of America (the)                             |
| Großmann, Carsten       | Lab engineer/ Chemical engineering - Technical chemistry                   | HTW Dresden                                                                | Germany                                                    |
| grosso, bernadette      | Dr - technicien formation & recherche                                      | université Paul Sabatier Toulouse                                          | France                                                     |
| Grosso-Silva, José      | Biologist, Entomology Curator                                              | Museu de História Natural e da Ciência, Universidade do Porto              | Portugal                                                   |
| Groton, James           | Environmental Scientist/Wetland Ecologist                                  | Environmental Consultant                                                   | United States of America (the)                             |
| Grove, Thomas           | PhD, marine biology                                                        | University of Edinburgh                                                    | United Kingdom of Great Britain and Northern Ireland (the) |
| Gruau, Gérard           | PhD, Research Director in Biogeochemistry and Water Pollution              | CNRS, Rennes University                                                    | France                                                     |
| Gruber, Monica          | Research Fellow                                                            | Victoria University of Wellington                                          | New Zealand                                                |
| Gruber, Petra           | Assoc. Prof. Biodesign                                                     | Biomimicry Research and Innovation Center                                  | United States of America (the)                             |

|                                          |                                                                                        |                                                                                                 |                                |
|------------------------------------------|----------------------------------------------------------------------------------------|-------------------------------------------------------------------------------------------------|--------------------------------|
| Gruetzmacher, Kim                        | Biomedical Sciences                                                                    |                                                                                                 | Germany                        |
| Grumbine, Robert                         | Professor (retired)                                                                    | Prescott College                                                                                | United States of America (the) |
| Grunauer, Michelle                       | Dean of the School of Medicine                                                         | Universidad San Francisco de Quito                                                              | Ecuador                        |
| Grüning, Björn                           |                                                                                        | Uni-Freiburg                                                                                    | Germany                        |
| Grünzweig, José                          | Prof. in ecology                                                                       | Hebrew University of Jerusalem                                                                  | Israel                         |
| Gruszk, Damian                           | Assistant Professor, Plant Genetics                                                    | University of Silesia                                                                           | Poland                         |
| Gutter, Alexandra                        | Marine Biologist                                                                       | The University of Queensland                                                                    | Australia                      |
| Grzelak, Sylwia                          | PhD student, assistant                                                                 | Polish Academy of Sciences                                                                      | Poland                         |
| Gržetić, Zvonko                          | Oceanology and Hydrography- Croatian ex. director of national hydrographic center      | Naukowe Centrum Prawno - Informatyczne- NCPI- Warszawa                                          | Poland                         |
| Gsell, Alena                             | junior research group leader                                                           | Netherlands Institute of Ecology (NIOO-KNAW)                                                    | Netherlands (the)              |
| Guadarrama Olivera, María de los Ángeles | Bióloga                                                                                | Universidad Juárez Autónoma de Tabasco                                                          | Mexico                         |
| Gualart, Javier                          | Doctor in Marine Biology                                                               | Independent - freelance researcher                                                              | Spain                          |
| Guaraldo, André de Camargo               | Professor                                                                              | Universidade Federal de Juiz de Fora                                                            | Brazil                         |
| Guardiola, Moisès                        | Associate Professor / Departament de Biologia Animal, de Biologia Vegetal i d'Ecologia | Universitat Autònoma de Barcelona                                                               | Spain                          |
| Guariento, Elia                          | PhD Student in Soil Ecology/Entomology                                                 | Eurac Research                                                                                  | Italy                          |
| Guayasamin, Juan M                       | Professor/Researcher                                                                   | Universidad San Francisco de Quito                                                              | Ecuador                        |
| Guazzaroni, María Eugenia                | Professor                                                                              | FFCLRP-USP                                                                                      | Brazil                         |
| Gubert, Flore                            | Economist                                                                              | IRD                                                                                             | France                         |
| Gudmundsdottir Aspelund, Snaefridur      | PhD student                                                                            | Reykjavik University                                                                            | Iceland                        |
| Guedes, Thaís                            | Senior Researcher                                                                      | State University of Maranhão                                                                    | Brazil                         |
| Guedes-Alonso, Rayco                     | PhD Researcher                                                                         | Universidad de Las Palmas de Gran Canaria                                                       | Spain                          |
| Guédron, Stéphane                        | Environmental scientist                                                                | Institute for research and development                                                          | France                         |
| gueguen, Laurent                         | associate professor bioinformatics                                                     | université Lyon 1                                                                               | France                         |
| Guenet, Bertrand                         | Biogeochemistry                                                                        | CNRS                                                                                            | France                         |
| Guerin, Alexis                           | Scientist Edible Mycorrhizal Fungi                                                     | The New Zealand Institute for Plant and Food Research                                           | New Zealand                    |
| Guernon, Stéphanie                       | Biologist                                                                              | UQAM                                                                                            | Canada                         |
| Guerra, Carlos António                   | Post-Doc                                                                               | German Center for Integrative Biodiversity Research (iDiv)                                      | Germany                        |
| Guerra, Roberta                          | University Professor, Ocean Sciences                                                   | University of Bologna                                                                           | Italy                          |
| Guerreiro, Sandra Maria                  | Teacher                                                                                | University of Campinas                                                                          | Brazil                         |
| Guerreiro, Bruno                         | PhD Biochemistry                                                                       | Universidade Nova de Lisboa                                                                     | Portugal                       |
| Guerrero, José                           | Professor of Biogeography                                                              | Instituto de Ecología y Ciencias Ambientales, Facultad de Ciencias, Universidad de la República | Uruguay                        |
| Guerrero, Francisco                      | Professor - Ecology                                                                    | University of Jaén                                                                              | Spain                          |
| Guerrero-Casado, José                    | Full Professor - PhD in Natural Resources Management                                   | Universidad Técnica de Manabí                                                                   | Ecuador                        |
| Guerrieri, Rossella                      | Assistant professor                                                                    | DISTAL, University of Bologna                                                                   | Italy                          |

|                               |                                                                                         |                                                             |                                                            |
|-------------------------------|-----------------------------------------------------------------------------------------|-------------------------------------------------------------|------------------------------------------------------------|
| Guerrini, Alessandra          | Associate professor                                                                     | University of Ferrara                                       | Italy                                                      |
| Guevara, Giovany              | Associate Professor                                                                     | Universidad del Tolima                                      | Colombia                                                   |
| Guidetti, Paolo               | Full Prof Ecology                                                                       | University of Nice Sophia Antipolis                         | France                                                     |
| Guidetti, Roberto             | Associated Professo in Zoology                                                          | University of modena and Reggio Emilia                      | Italy                                                      |
| GUIDI, Daniele                | Managing director and founder of Ecosoluzioni, energy and environmental consulting firm | Harvard University - HKS (alumni)                           | Italy                                                      |
| Guilbert, Eric                | Associate Professor Entomologist                                                        | Museum national d'histoire naturelle                        | France                                                     |
| Guilbert, Aurelie             | Astrophysicist                                                                          | CNRS                                                        | France                                                     |
| Guilcher, Marine              | PhD student                                                                             | INRA                                                        | France                                                     |
| Gillet, Jérôme                | Astrophysicist                                                                          | CEA - Astrophysics Department                               | France                                                     |
| Guilford, Parry               | Research Professor, Cancer Genetics                                                     | University of Otago                                         | New Zealand                                                |
| Guilhaumon, François          | research scientist                                                                      | IRD - MARBEC                                                | France                                                     |
| Guilherme, João L.            | Early Career Researcher                                                                 | Centre d'Ecologie Fonctionnelle et Evolutive (CEFE - CNRS)  | France                                                     |
| Guilherme, Frederico          | Professor Associado                                                                     | Universidade Federal de Jataí                               | Brazil                                                     |
| Guillard, Jean                | Limnology                                                                               | INRA                                                        | France                                                     |
| GUILLAUME, Astrid             | Assistant Professor (Semiotics)                                                         | Sorbonne University                                         | France                                                     |
| GUILLEBAUD, JOHN              | Emeritus Professor of Family Planning & Reproductive Health                             | University College London                                   | United Kingdom of Great Britain and Northern Ireland (the) |
| GUILLEMOT, Joannès            | Researcher                                                                              | Cirad                                                       | France                                                     |
| Guillet, Bruno                | Associate professor (applied physics)                                                   | Caen Normandy university                                    | France                                                     |
| Guilley, Elsa                 | Student in an engineer school (agronomics)                                              | Bordeaux Sciences Agro                                      | France                                                     |
| Guillonneau, Richard          | Research fellow                                                                         | University of Warwick                                       | United Kingdom of Great Britain and Northern Ireland (the) |
| Guillot, Sebastien            | Astrophysics                                                                            | IRAP                                                        | France                                                     |
| Guilloteau, Stéphane          | Astrophysicist                                                                          | CNRS - Université de Bordeaux                               | France                                                     |
| Guillou, Emmanuelle           | Biology                                                                                 | University                                                  | France                                                     |
| Guillou, Léonard              | PhD student in Cognitive Sciences (Evolution and Social Cognition team)                 | Institut Jean Nicod / LNC2, Ecole Normale Supérieure, Paris | France                                                     |
| Guimarães, Carlos             | PhD Student                                                                             | 3B's Research Group - University of Minho                   | Portugal                                                   |
| GUIMARÃES, MARIA BEATRIZ      | University Professor                                                                    | Federal University of Pernambuco                            | Brazil                                                     |
| Guimarães Nobre, Regina Lúcia | PhD student in Ecology                                                                  | UFRN                                                        | Brazil                                                     |
| Guimbretiére, Guillaume       | Associate Researcher                                                                    | CNRS (LACy UM8105)                                          | France                                                     |
| GUINAND, Bruno                | Associate Professor                                                                     | Université de Montpellier / University of Montpellier       | France                                                     |
| Guinet, Maé                   | PhD - Agronomy                                                                          | INRA                                                        | France                                                     |
| Guiomar, Nuno                 | Researcher                                                                              | ICAAM, University of Évora                                  | Portugal                                                   |
| GUIOT, JOEL                   | Professor climatology                                                                   | CNRS                                                        | France                                                     |
| Guiscafré, Agustín            | Biologist                                                                               | Dept. Ecology & Environmental Sc., Maimonides University    | Argentina                                                  |
| Guitet, Stéphane              | Forest Engineer, Doctor (Tropical Ecology)                                              | IGN                                                         | France                                                     |
| Guix, Juan Carlos             | Ecology - NeoPangea Project                                                             | University of Barcelona                                     | Spain                                                      |
| Gullan, Penelope              | Emeritus Professor                                                                      | The Australian National University                          | Australia                                                  |

|                                       |                                                                  |                                                                                                      |                                                            |
|---------------------------------------|------------------------------------------------------------------|------------------------------------------------------------------------------------------------------|------------------------------------------------------------|
| Gumbs, Rikki                          | PhD Student                                                      | Imperial College London                                                                              | United Kingdom of Great Britain and Northern Ireland (the) |
| Gunczy, Johanna                       | Zoologie, Biodiversity, Carabidae                                | Museum Joanneum, Graz, Austria                                                                       | Austria                                                    |
| Gunnarsson, Gunnar                    | Associate professor in Animal Ecology                            | Kristianstad University                                                                              | Sweden                                                     |
| Gunnarsson, Tómas Grétar              | Research professor in ecology                                    | University of Iceland                                                                                | Iceland                                                    |
| GUNTHER, ANDREW                       | Environmental Science                                            | Center for Ecosystem Management & Restoration                                                        | United States of America (the)                             |
| Günther, Linus                        | Postdoctoral researcher in Evolutionary Biology                  | Museum für Naturkunde Berlin                                                                         | Germany                                                    |
| gunton, thomas                        | Director, Resource and Environmental Planning Program            | Simon Fraser University                                                                              | Canada                                                     |
| Gunzburg, Daniel                      | Environmental Scientist                                          | James Cook University                                                                                | Australia                                                  |
| GUO, Jing                             | Phd Student in public health                                     | Curtin University                                                                                    | Australia                                                  |
| Gupta, Vijai Kumar                    | Senior Scientist                                                 | Estonian University of Life Sciences, Tartu                                                          | Estonia                                                    |
| Gupta, Kailash                        | Veterinarian/Neuroscientist                                      | Ex-CPSC                                                                                              | United States of America (the)                             |
| Gupta, Mukesh                         | Post-doctoral Researcher Remote Sensing/Geophysics of Cryosphere |                                                                                                      | Canada                                                     |
| Gurevitch, Jessica                    | Distinguished Professor; Ecology and Evolution                   | Stony Brook University                                                                               | United States of America (the)                             |
| Gurnani Serrano, Carlos Karan         | PhD student                                                      | University of Milan                                                                                  | Italy                                                      |
| Gurpide, Andres                       | Astrophysics                                                     | Institut de Recherche en Astrophysique et Planétologie (IRAP)                                        | France                                                     |
| Gurvich, Diego E.                     | Independent Researcher                                           | CONICET-UNC                                                                                          | Argentina                                                  |
| Guschanski, Katerina                  | Group leader, Evolutionary Biology                               | Uppsala University                                                                                   | Sweden                                                     |
| Guseva, Serafima                      | PhD student                                                      | Institute of Structural Biology, Grenoble                                                            | France                                                     |
| Gusman ferraz, José Maria             | Professor/ agroecology                                           | Unicamp / Uniara                                                                                     | Brazil                                                     |
| Gusmão, Ana Carolina                  | BSc. Oceanography                                                | USP - University of São Paulo                                                                        | Brazil                                                     |
| Gust, Juliane                         | Physician Scientist, Pediatric Neurology                         | Seattle Children's/University of Washington                                                          | United States of America (the)                             |
| Gustafsson, Robert                    | Postdoctoral researcher, Structural Biology                      | Uppsala University                                                                                   | Sweden                                                     |
| Gustavsson, Emil                      | Principal research engineer in chemistry                         | University of Gothenburg                                                                             | Sweden                                                     |
| Gustavsson, Eva                       | PhD, Senior lecturer                                             | Dep of Conservation, University of Gothenburg                                                        | Sweden                                                     |
| Gutenstein, Marloes                   | Atmospheric Scientist                                            | German Meteorological Service                                                                        | Germany                                                    |
| Guth, Miriam Karen                    | Forestry                                                         |                                                                                                      | Germany                                                    |
| Guthke, Reinhard                      | Professor of Systems Biology                                     | Leibniz Institute for Natural Product Research and Infection Biology –Hans Knöll Institute (HKI)     | Germany                                                    |
| Gutierrez, Ana                        | PhD                                                              | IST                                                                                                  | Austria                                                    |
| Gutierrez, Marco                      | PhD Candidate                                                    | RMIT University                                                                                      | Australia                                                  |
| Gutierrez Robledo, Luis Miguel        | Director General                                                 | Instituto Nacional de Geriatria                                                                      | Mexico                                                     |
| Gutierrez-Adan, Alfonso               | Professor                                                        | INIA                                                                                                 | Spain                                                      |
| Gutiérrez-Cánovas, Cayetano           | Postdoc researcher - Ecology                                     | University of Minho                                                                                  | Portugal                                                   |
| Gutiérrez-Cárdenas, Paul Davi Alfonso | Associate professor -herpetology                                 | Departamento de Ciencias Biológicas, Facultad de Ciencias Exactas y Naturales, Universidad de Caldas | Colombia                                                   |
| Gutiérrez-Expósito, Carlos            | PhD student Conservation Biology                                 | Estación Biológica de Doñana                                                                         | Spain                                                      |
| Gutierrez-Fonseca, Pablo              | Biology                                                          | University of Costa Rica                                                                             | Costa Rica                                                 |
| Gutleb, Arno                          | Group Leader                                                     | Environmental Scientist / Toxicologist                                                               | Luxembourg                                                 |

|                       |                                                                         |                                                                                       |                                                            |
|-----------------------|-------------------------------------------------------------------------|---------------------------------------------------------------------------------------|------------------------------------------------------------|
| Gutsche-Jones, Fanny  | Community Manager                                                       | Citizen Science Center Zurich                                                         | Switzerland                                                |
| Guuroh, Reginald Tang | Research Scientist                                                      | Council for Scientific and Industrial Research - Forestry Research Institute of Ghana | Ghana                                                      |
| Guy-Haim, Tamar       | Marine Biology researcher                                               | Israel Oceanography and Limnology Research                                            | Israel                                                     |
| Guyon, Frédéric       | Sociologie                                                              | Universite de Franche-Comté                                                           | France                                                     |
| Guzmán-Jacob, Valeria | PhD. student. Biodiversity and Ecology                                  | University of Göttingen                                                               | Germany                                                    |
| Guzy, Anna            | Phd                                                                     | University of Silesia                                                                 | Poland                                                     |
| Gwedla, Nanamhla      | PhD Candidate- Urban Ecology                                            | Rhodes University                                                                     | South Africa                                               |
| Gwynne-Jones, Richard | Master of Biology (Marine and Freshwater)                               | Blue Domain                                                                           | United Kingdom of Great Britain and Northern Ireland (the) |
| H. N. Chong, Mike     | Independent ornithologist/naturalist                                    | Oriental Bird Club Country representative                                             | Malaysia                                                   |
| Haanappel, Evert      | Biophysicist                                                            | CNRS                                                                                  | France                                                     |
| Haapakoski, Marko     | Post doc researcher / Ecology                                           | University of Jyväskylä / Konnevesi Research Station                                  | Finland                                                    |
| Haas, Edwin           | Senios Scientist Greenhouse Gas Emissions (N2O)                         | Karlsruhe Institute of Technology (KIT)                                               | Germany                                                    |
| Haber, Istvan         | assistant professor                                                     | University of Pecs                                                                    | Hungary                                                    |
| Haber, Ariela         | Post doc                                                                |                                                                                       | United States of America (the)                             |
| Haberkern, Andrea     | PhD student of Zoology                                                  | UBC                                                                                   | Canada                                                     |
| Haberlin, Damien      | Research Scientist                                                      | University College Cork                                                               | Ireland                                                    |
| Haberstroh, Simon     | PhD student                                                             |                                                                                       | Germany                                                    |
| Habibzadeh, Nader     | Assistant professor/Environmental science                               | Islamic Azad University                                                               | Iran (Islamic Republic of)                                 |
| Habit, Evelyn         | Professor                                                               | Facultad de Ciencias Ambientales. Universidad de Concepción.                          | Chile                                                      |
| Hackl, Lukas          | Environmental Engineering                                               | UC Berkeley                                                                           | United States of America (the)                             |
| Hacquin, Anne-Sophie  | Research Engineer in Cognitive Science                                  | ENS                                                                                   | France                                                     |
| Haddad, Stephanie     | Research assistant                                                      | Queens                                                                                | Canada                                                     |
| Haddad, Célio         | Professor of Vertebrate Zoology                                         | Universidade Estadual Paulista (UNESP)                                                | Brazil                                                     |
| Haddock, Joanna       | PhD in Ecology                                                          | The University of Sydney                                                              | Australia                                                  |
| Hadfield, Michael G.  | Biology                                                                 | University of Hawaii at Manoa                                                         | Uruguay                                                    |
| Hadfield, Michael     | Professor of Biology Emeritus                                           | University of Hawaii at Manoa                                                         | United States of America (the)                             |
| Hadjeras, Lydia       | Postdoctoral researcher                                                 |                                                                                       | Germany                                                    |
| Hadjoannou, Louis     | Research Director                                                       | Enalia Physis Environmental Research Centre                                           | Cyprus                                                     |
| Haechler, Iwan        | Phd Student, Thermodynamics                                             | ETH Zurich                                                                            | Switzerland                                                |
| Haed, Jason           | University Lecturer                                                     | University of Cambridge                                                               | United Kingdom of Great Britain and Northern Ireland (the) |
| haegele, anna         | medical doctor                                                          |                                                                                       | Germany                                                    |
| Haegeli, Pascal       | Assistant Professor, Resource and Environmental Management              | Simon Fraser University                                                               | Canada                                                     |
| Haeger, Christof      | Physicist, Dr. in Chemistry, PhD Thesis in Global Biogeochemical Cycles | ICH Institut Christof Haeger                                                          | Germany                                                    |
| Haesler, Marcel       | lab manager                                                             | University of Bern/Eawag                                                              | Switzerland                                                |
| Hagan, Emily          |                                                                         | Hagan                                                                                 | United States of America (the)                             |
| Hage, Joseph          | Biology Professor/Researcher                                            | Algonquin college Ottawa                                                              | Canada                                                     |

|                          |                                                     |                                                                                      |                                                            |
|--------------------------|-----------------------------------------------------|--------------------------------------------------------------------------------------|------------------------------------------------------------|
| Hagedorn, Gregor         | Senior Scientist                                    | Museum für Naturkunde                                                                | Germany                                                    |
| Haggard, Judy            | Wildlife biologist                                  | Retired                                                                              | United States of America (the)                             |
| Hagge, Jonas             | Forest ecology                                      | Technical University of Munich                                                       | Germany                                                    |
| Hagolle, Olivier         |                                                     | CESBIO                                                                               | France                                                     |
| Haguet, Vincent          | Engineering                                         | CEA                                                                                  | France                                                     |
| Hahn, Thomas             | Associate Professor in Ecological Economics         | Stockholm University                                                                 | Sweden                                                     |
| Hahn, Dr. Aljoscha Maria | Physics                                             | Martin-Buber-Oberschule Berlin                                                       | Germany                                                    |
| Haigh, Amy               | Zoology                                             | University College Dublin                                                            | Ireland                                                    |
| Haigh, Anthony           | Senior Lecturer in Plant Biology                    | Western Sydney University                                                            | Australia                                                  |
| Haines, Andrew           | Professor of Environmental Change and Public Health | London School of Hygiene and Tropical Medicine                                       | United Kingdom of Great Britain and Northern Ireland (the) |
| Haining, Brianna         | PhD Candidate, Plant Science                        | University of California Berkeley                                                    | United States of America (the)                             |
| Hajduczyk, Jesica        | Doctoral Student                                    | IMBIV                                                                                | Argentina                                                  |
| Hakala, Kirsti           | PhD Researcher                                      | University of Zurich                                                                 | Switzerland                                                |
| Hakala, Emma             | Senior Visiting Fellow                              | Finnish Institute of International Affairs                                           | Finland                                                    |
| Hake, Sarah              | Adjunct Professor and Center Director               | Plant Gene Expression Center, Agricultural Research Service                          | United States of America (the)                             |
| Haklay, Mordechai        | Professor of Geographical Information Science       | UCL                                                                                  | United Kingdom of Great Britain and Northern Ireland (the) |
| Halabowski, Dariusz      | Hydrobiology                                        | University of Silesia in Katowice                                                    | Poland                                                     |
| Halajian, Ali            | Senior Researcher                                   | University of Limpopo                                                                | South Africa                                               |
| Halat, Zuzanna           | PhD student                                         |                                                                                      | Poland                                                     |
| Halbert-Howard, Aladdin  | Horticultural Research Assistant                    | Leibniz-Institute of Vegetable and Ornamental Crops (IGZ)                            | Germany                                                    |
| Halbritter, Aud Helen    | Researcher                                          | University of Bergen                                                                 | Norway                                                     |
| Hale, Brack              | Professor of Biology and Environmental Science      | Franklin University Switzerland                                                      | Switzerland                                                |
| Hale, Susanne            | Climate Agroforestry researcher                     | University of Massachusetts Amherst / Tending the Wild Climate Agroforestry Research | United States of America (the)                             |
| HALEN, Henri             | Invited profesor soil science                       | Université or Louvain                                                                | Belgium                                                    |
| Hales, Karen             | Professor of Biology                                | Davidson College                                                                     | United States of America (the)                             |
| Hales, Simon             | Research Associate Professor                        | University of Otago                                                                  | New Zealand                                                |
| Hall, Steven             | Assistant Professor of Biogeochemistry              | Iowa State University                                                                | United States of America (the)                             |
| Hall, William P.         | Retired [PhD Evolutionary Biology, Harvard, 1973]   | Hon. Associate, eScholarship Research Centre, Univ. Melbourne                        | Australia                                                  |
| Hall, Jane               | Wildlife Health                                     |                                                                                      | Australia                                                  |
| Hall, Mark               | Postdoctoral Research Fellow                        | Western Sydney University                                                            | Australia                                                  |
| Hall, Roberta            | Professor of Anthropology, Emeritus                 | Oregon State University                                                              | United States of America (the)                             |
| Hall, Melinda            | PhD, Physical Oceanography, research specialist     | Woods Hole Oceanographic Institution                                                 | United States of America (the)                             |
| Hall, Richard            | Assistant Professor, Ecology                        | Odum School of Ecology, University of Georgia                                        | United States of America (the)                             |
| Hall-Spencer, Jason      | Professor of Marine Biology                         | Universities of Plymouth (UK) and Tsukuba (Japan)                                    | United Kingdom of Great Britain and Northern Ireland (the) |
| Halleran, Patricia C.    | Ph.D. Student, Applied Anthropology                 | Oregon State University                                                              | United States of America (the)                             |

|                               |                                                                       |                                                                   |                                                            |
|-------------------------------|-----------------------------------------------------------------------|-------------------------------------------------------------------|------------------------------------------------------------|
| Hallett, Mark                 | Assistant Research Professor of Biology-Retired                       | Indiana University                                                | United States of America (the)                             |
| Hallewell, Gregory            | Physicist, Particle Physics                                           | Centre de Physique des Particules de Marseille (CNRS/IN2P3)       | France                                                     |
| Hallgrimsson, Gunnar Thor     | Professor of zoology                                                  | University of Iceland                                             | Iceland                                                    |
| Halligan, John Gerard Anthony | Psychology/Neuroscience/Cell Biology                                  | University College Dublin                                         | Ireland                                                    |
| Halloran, Maddie              | Fisheries Biologist/Master's Student                                  | Humboldt State University                                         | United States of America (the)                             |
| Halmo, David                  | Anthropologist                                                        | EnvAnthro Consulting, LLC                                         | United States of America (the)                             |
| Halpenny, Elizabeth           | Associate Professor / Social Scientist                                | University of Alberta                                             | Canada                                                     |
| Halperin, Alexander           | Professor                                                             | Salisbury University                                              | United States of America (the)                             |
| Halpin, Luke                  | Ecologist and PhD Candidate                                           | Monash University                                                 | Australia                                                  |
| Halsey, Richard               | Director/Ecology                                                      | California Chaparral Institute                                    | United States of America (the)                             |
| Halupka, Lucyna               | biology                                                               | Wrocław University                                                | Poland                                                     |
| Hämäläinen, Hans              | Postdoctoral researcher / Social sciences                             | University of Turku                                               | Finland                                                    |
| Hämäläinen, Anni              | Adjunct Research                                                      | Jagiellonian University                                           | Poland                                                     |
| Hambach, Ulrich               | Senior Scientist, Geography/Geoecology/Quaternary Research            | University of Bayreuth                                            | Germany                                                    |
| Hambrey, Michael              | Emeritus Professor of Glaciology                                      | Aberystwyth University                                            | United Kingdom of Great Britain and Northern Ireland (the) |
| Hamel, Nathalie               | Ecosystem analyst                                                     | Puget Sound Partnership                                           | United States of America (the)                             |
| Hamel, Sandra                 | Associate Professor                                                   | Université Laval                                                  | Canada                                                     |
| Hamelin, Jérôme               | Senior Researcher in Microbial Ecology                                | INRA                                                              | France                                                     |
| Hamelin, Claire               | PhD                                                                   | CEA                                                               | France                                                     |
| Hames, Fern                   |                                                                       | Arthur Rylah Institute for Environmental Research                 | Australia                                                  |
| Hamilton, Alison              | Assistant Teaching Professor, Biological Sciences                     | University of Massachusetts, Lowell                               | United States of America (the)                             |
| Hamilton, Martin              | Botanist                                                              | Royal Botanic Gardens, Kew                                        | United Kingdom of Great Britain and Northern Ireland (the) |
| Hamilton, Terry               | Environmental Scientist                                               |                                                                   | United States of America (the)                             |
| Hamilton, Mark                | Fisheries Research Assistant                                          | NAFC Marine Centre                                                | United Kingdom of Great Britain and Northern Ireland (the) |
| Hamm, Joshua                  | Graduate Student                                                      | UNSW                                                              | Australia                                                  |
| Hammecker, Claude             | Senior researcher                                                     | IRD                                                               | France                                                     |
| Hammelehle, Andreas           | Applied sciences in organic agriculture                               | Landesbetrieb Landwirtschaft Hessen                               | Germany                                                    |
| Hammond, Keith                | Retired, Senior Officer, Animal Genetic Resources                     | Food & Agriculture of the United Nations                          | Australia                                                  |
| Hampe, Arndt                  | Senior scientist                                                      | INRA                                                              | France                                                     |
| Hampton, Shaun Reid           | Palaeoclimatologist Environmental Sustainability and Green technology | Keele University, UK                                              | United Kingdom of Great Britain and Northern Ireland (the) |
| Hanbury, Hugo                 | Research Associate                                                    | Centre of Development and Environment                             | Switzerland                                                |
| Hancart Petitot, Pascale      | Researcher, anthropology                                              | Institut de Recherche pour le Développement                       | France                                                     |
| Hance, Thierry                | Professor                                                             | Université catholique de Louvain                                  | Belgium                                                    |
| Hancock, Trevor               | Retired Professor, Public Health                                      | School of Public Health and Social Policy, University of Victoria | Canada                                                     |
| Hancock, Nola                 | Postdoctoral Researcher                                               | Macquarie University                                              | Australia                                                  |

|                        |                                               |                                                                           |                                                            |
|------------------------|-----------------------------------------------|---------------------------------------------------------------------------|------------------------------------------------------------|
| Handley, Claire        | Clinical Psychology                           | Bangor university                                                         | United Kingdom of Great Britain and Northern Ireland (the) |
| Hänel, Anne            | B.Sc., Master Student, Biology                |                                                                           | Germany                                                    |
| Hanford, Jayne         | PhD student, freshwater ecology               | The University of Sydney                                                  | Australia                                                  |
| HANKEN, James          | Director                                      | Harvard Museum of Comparative Zoology                                     | United States of America (the)                             |
| Hankins, Richard       | Engineering                                   | Cambridge University                                                      | United Kingdom of Great Britain and Northern Ireland (the) |
| Hanna, Dr Liz          | Climate Change & Human Health Researcher      | Australian National University                                            | Australia                                                  |
| Hanna, David           | Emeritus professor of Physics                 | University of Southampton                                                 | United Kingdom of Great Britain and Northern Ireland (the) |
| Hannam, Kirsten        | Agroecology                                   | Agriculture and Agri-Food Canada                                          | Canada                                                     |
| Hanneman, Debra        | CEO                                           | Whitehall Geogroup, Inc.                                                  | United States of America (the)                             |
| Hannula, Emilia        | Resercher in microbial ecology                | Netherlands Institute of Ecology                                          | Netherlands (the)                                          |
| Hanold, PhD, Dagmar    | plant virologist                              |                                                                           | Australia                                                  |
| HANOT, Pauline         | Postdoctoral researcher                       | Max Planck Institute for the Science of Human History                     | Germany                                                    |
| Hanschen, Franziska S. | Research Group Leader, Food Chemist           | Leibniz Institute of Vegetable and Ornamental Crops (IGZ) e.V.            | Germany                                                    |
| Hänsel, Patrick        | PhD student in Geosciences                    | GeoZentrum Nordbayern                                                     | Germany                                                    |
| Hansen, Christian      | Scientific Associate                          | Center for Marine Environmental Sciences (MARUM)                          | Germany                                                    |
| Hansen, Marten         | PhD, Molecular Biologist                      |                                                                           | Netherlands (the)                                          |
| Hansen, Dennis         | Tropical Ecology                              | University of Zurich                                                      | Switzerland                                                |
| Hansen, Dominique      | Marine ecology and evolutionary biology       |                                                                           | United States of America (the)                             |
| Hansen, Jennifer       | Landscape Ecologist                           | University of South-Eastern Norway                                        | Norway                                                     |
| Hansen, James          | Environmental Scientist                       |                                                                           | United States of America (the)                             |
| Hansen, Lara           | Chief Scientist                               | EcoAdapt                                                                  | United States of America (the)                             |
| Hansen, Julia          | Master Student                                | Ruprecht-Karls-Universität Heidelberg                                     | Germany                                                    |
| Hanß, Sebastian        |                                               | Department of Ecosystem Modelling Büsgen-Institut University of Göttingen | Germany                                                    |
| Hansson, Lon           | PhD student                                   | Stockholm University                                                      | Sweden                                                     |
| Hansul, Simon          | Phd student                                   | Ghent University                                                          | Belgium                                                    |
| Hanukoglu, Israel      | Professor of Biochemistry                     | Ariel University                                                          | Israel                                                     |
| HANUS, Cyril           | Group leader                                  | Inserm                                                                    | France                                                     |
| Harbor, Jonathan       | Departments of Geography and Geosciences      | University of Montana                                                     | United States of America (the)                             |
| Harbottle, Michael     | Senior Lecturer, Geoenvironmental Engineering | Cardiff University                                                        | United Kingdom of Great Britain and Northern Ireland (the) |
| Harbour, Sophie        | Paediatric Registrar, Medicine                | Dorset County Hospital                                                    | United Kingdom of Great Britain and Northern Ireland (the) |
| Harbour, Lindsey       | Obstetrician Gynecologist                     | Auckland City Hospital                                                    | New Zealand                                                |
| Harbour, Gary          | Medicinal Biochemistry                        | University of Illinois                                                    | United States of America (the)                             |
| Harcourt, Rob          | Professor of Marine Ecology                   | Macquarie University                                                      | Australia                                                  |
| Harcourt, William      | PhD Student                                   | University of St Andrews                                                  | United Kingdom of Great Britain and Northern Ireland (the) |

|                                  |                                                             |                                                                    |                                                            |
|----------------------------------|-------------------------------------------------------------|--------------------------------------------------------------------|------------------------------------------------------------|
| Hardcastle, Kathryn              | CEO of Environmental NGO / BSc EnvSc                        | Murdoch University, Australia                                      | United Kingdom of Great Britain and Northern Ireland (the) |
| Hardenbol, Alwin                 | Early stage researcher in forest ecology                    | University of Eastern Finland                                      | Finland                                                    |
| Harding, Bill                    | Aquatic Science/Environmental Law                           | DH Environmental Consulting (Pty) Ltd                              | South Africa                                               |
| Harding, Cheryl                  | Professor Emerita                                           | Hunter College, CUNY                                               | United States of America (the)                             |
| Harding, Jon                     | Professor of freshwater ecology                             | University of Canterbury                                           | New Zealand                                                |
| Hardman, Francisco Foot          | Full Professor in Cultural Studies                          | State University of Campinas (UNICAMP)                             | Brazil                                                     |
| Hardy, Sam                       | Postdoctoral Research Scientist                             | University of Leeds                                                | United Kingdom of Great Britain and Northern Ireland (the) |
| Hardy, Douglas                   | Senior Research Fellow                                      | University of Massachusetts Amherst                                | United States of America (the)                             |
| Hardy, Ian C.W.                  | Associate Professor and Reader in Animal Population Biology | University of Nottingham                                           | United Kingdom of Great Britain and Northern Ireland (the) |
| Haring, Michel                   | Professor in Plant Physiology                               | SILS, University of Amsterdam                                      | Netherlands (the)                                          |
| Harisoa Mampionona, RAKOTONIRINA | PhD candidate / Architecture                                | Université Grenoble Alpes                                          | France                                                     |
| Haritashya, Umesh                | Associate Professor / Glacial Geologist                     | University of Dayton                                               | United States of America (the)                             |
| Harle, J. Rodney                 | Geneticist                                                  | Retired                                                            | Canada                                                     |
| Harmackova, Zuzana               | Postdoctoral researcher in sustainability science           | Stockholm Resilience Centre                                        | Sweden                                                     |
| Harms, Kyle                      | Professor                                                   | Louisiana State University                                         | United States of America (the)                             |
| Harnett, Julianne                | Astrophysicist                                              | University of Sydney                                               | Australia                                                  |
| Harnisch, Brian                  | Senior Research Scientist                                   | University of Wyoming                                              | United States of America (the)                             |
| Harnos, Andrea                   | associate professor, statistics                             | University of Veterinary Medicine Budapest                         | Hungary                                                    |
| Harpenslager, Sarah Faye         | Postdoctoral Researcher                                     | Leibniz-Institute of Freshwater Ecology and Inland Fisheries (IGB) | Germany                                                    |
| Harper, Ashleigh                 | PhD student                                                 | Swansea University                                                 | United Kingdom of Great Britain and Northern Ireland (the) |
| Harper, David                    | Geography-Planning                                          |                                                                    | Canada                                                     |
| HARPIN, RAYMOND                  | GEOLOGIST                                                   | ACTION ENVIRONMENTAL                                               | United States of America (the)                             |
| Harrington, Jacquelyn            | Research Support Specialist                                 | Cornell University                                                 | United States of America (the)                             |
| Harris, James                    | Chesebrough Professor ofElectrical Engineering              | Stanford University                                                | United States of America (the)                             |
| Harris, Rebecca                  | Lecturer in Climatology and climate impacts researcher      | University of Tasmania                                             | Australia                                                  |
| Harris, Sara                     | Professor                                                   | University of British Columbia                                     | Canada                                                     |
| Harris, Richard                  | Biochemistry                                                | Retired                                                            | United States of America (the)                             |
| Harris, Emma                     | Head of Scientific Development and Academic Relations       | Humane Solutions Inc                                               | Canada                                                     |
| Harris, John                     | Adjunct Associate Professor                                 | UNSW Sydney                                                        | Australia                                                  |
| Harrison, Rachel                 | Postdoctoral researcher                                     | Universite de Lausanne                                             | Switzerland                                                |
| Harrison, Mark                   |                                                             | Borneo Nature Foundation and University of Leicester               | United Kingdom of Great Britain and Northern Ireland (the) |
| HARRISS-WHITE, BARBARA           | Emeritus Professor of Development Studies                   | Oxford University                                                  | United Kingdom of Great Britain and Northern Ireland (the) |

|                              |                                                                        |                                                                                                                                |                                                            |
|------------------------------|------------------------------------------------------------------------|--------------------------------------------------------------------------------------------------------------------------------|------------------------------------------------------------|
| Harrod, Ryan                 | Associate Professor of Anthropology                                    | University of Alaska Anchorage                                                                                                 | United States of America (the)                             |
| Harscoat-Schiavo, Christelle |                                                                        | CNRS                                                                                                                           | France                                                     |
| Hart, Darren                 | CNRS Research Director, Biology.                                       | CNRS                                                                                                                           | France                                                     |
| Hart, Stephen                | Professor of Ecology                                                   | University of California Merced                                                                                                | United States of America (the)                             |
| Hart, Emma                   | Zoologist/PhD Candidate                                                | University College Dublin                                                                                                      | Ireland                                                    |
| Hart-Davis, Adam             | Chemistry                                                              | Dr                                                                                                                             | United Kingdom of Great Britain and Northern Ireland (the) |
| Harte, Mary                  | botanical consultant                                                   |                                                                                                                                | United States of America (the)                             |
| Harte, John                  | Professor of Ecosystem Sciences                                        | University of California, Berkeley                                                                                             | United States of America (the)                             |
| Hartebrodt, Lena             | PhD student, Marine Science                                            | University of Auckland                                                                                                         | New Zealand                                                |
| Hartke, Tamara               | Animal Ecology                                                         | University of Göttingen                                                                                                        | Germany                                                    |
| Härtl, Fabian                | Associate Researcher                                                   | Technical University of Munich                                                                                                 | Germany                                                    |
| Hartley, Jesse               | Masters student in Microbiology                                        | University of Pretoria                                                                                                         | South Africa                                               |
| hartmann, catherine          | ingenior                                                               | institut de recherche pour le developpement IRD                                                                                | France                                                     |
| Hartmann, Heidi              | Program Manager - Land Resources and Energy Policy                     | Argonne National Laboratory                                                                                                    | United States of America (the)                             |
| Hartmann, Johannes           | Physician, MD                                                          |                                                                                                                                | Germany                                                    |
| Hartmann, Andreas            | Junior-Professor in Hydrological Modeling and Water Resources          | University of Freiburg                                                                                                         | Germany                                                    |
| Hartmann, Marcus             | Project Group Leader                                                   | Max Planck Institute for Developmental Biology                                                                                 | Germany                                                    |
| Hartmann, Hanna              | Disturbance Ecology                                                    | University of Bayreuth                                                                                                         | Germany                                                    |
| Hartmann, Dennis             | Professor of Atmospheric Sciences                                      | University of Washington Seattle                                                                                               | United States of America (the)                             |
| Hartshorne, Joshua           | Assistant Professor of Cognitive Science                               | Boston College                                                                                                                 | United States of America (the)                             |
| Hartung, Cynthia             | Professor of Psychology                                                | University of Wyoming                                                                                                          | United States of America (the)                             |
| Harvey, Violet               | PhD student in astrophysics                                            | The University of Adelaide                                                                                                     | Australia                                                  |
| Harvey, Eric                 | Assistant Professor - Ecology                                          | University of Montreal                                                                                                         | Canada                                                     |
| Harvey, Naomi                | Research fellow - Zoology                                              | The University of Nottingham                                                                                                   | United Kingdom of Great Britain and Northern Ireland (the) |
| Harvey, Jeffrey              | Professor and Senior Scientist                                         | Netherlands Institute of Ecology                                                                                               | Netherlands (the)                                          |
| Harwatt, Helen               | Research Fellow                                                        | Harvard Law School                                                                                                             | United States of America (the)                             |
| Harwell, Hugh                | Retired Ecologist & Natural History Resource Management Program Leader | Formerly Bureau of Land Management, Federal Committee on Ecological Reserves & Man And The Biosphere North America Directorate | United States of America (the)                             |
| Hashim, Syafiqah             |                                                                        | University Malaysia of Terengganu                                                                                              | Malaysia                                                   |
| Haskett, Jonathan            | Soil Science                                                           |                                                                                                                                | United States of America (the)                             |
| Hassanin, Alexandre          | Evolution                                                              | Sorbonne Université / Muséum national d'Histoire naturelle                                                                     | France                                                     |
| Hassellöv, Ida-Maja          | Associate professor Maritime environmental science                     | Chalmers University of Technology                                                                                              | Sweden                                                     |
| Hasselwander, Marc           | Civil Engineering                                                      | University of Coimbra                                                                                                          | Portugal                                                   |
| Hassenrück, Christiane       | Postdoc                                                                | Leibniz Centre for Tropical Marine Research                                                                                    | Germany                                                    |
| Hastings, Philip             | Professor                                                              | Scripps Institution of Oceanography                                                                                            | United States of America (the)                             |
| Haswell, Peter               | Wildlife Biologist                                                     | Bangor University                                                                                                              | United Kingdom of Great Britain and Northern Ireland (the) |

|                           |                                                                 |                                                                     |                                                            |
|---------------------------|-----------------------------------------------------------------|---------------------------------------------------------------------|------------------------------------------------------------|
| Haswell, Melissa          | Environmental Health                                            | Queensland University of Technology                                 | Australia                                                  |
| Hatch, Walter             | Professor of Biology Emeritus                                   | St Mary's College of Maryland                                       | United States of America (the)                             |
| Hatjina, Fani             | Seniour Researcher                                              | Division of Apiculture- H.A.O. "DEMETER"                            | Greece                                                     |
| Haubrich, Kevin           | PhD student in Structural Biology                               | European Molecular Biology Laboratory (EMBL)                        | Germany                                                    |
| Haubrock, Phillip Joschka | PostDoc                                                         | Senckenberg Research Institute and Natural History Museum Frankfurt | Germany                                                    |
| Hauck, Stefanie           | MS in Sustainability Candidate                                  | Chatham University                                                  | United States of America (the)                             |
| Haudry, Annabelle         | Associate Professor                                             | University of Lyon1                                                 | France                                                     |
| Hauenstein, Christian     | Research Associate                                              | Technische Universität Berlin                                       | Germany                                                    |
| Haugen, Thrond            | Professor                                                       | Norwegian University for Life Sciences                              | Norway                                                     |
| Hauke, Ronja              | MSc Student in Marine Biology                                   | Victoria University of Wellington                                   | New Zealand                                                |
| Haupt, Heiko              | Biologist                                                       | Federal Agency for Nature Conservation                              | Germany                                                    |
| Hauptmann, Demian         | PhD Student                                                     |                                                                     | Sweden                                                     |
| Hauray, Maxime            | Associate professor, Mathematics                                | Aix-Marseille University                                            | France                                                     |
| Hausmann, Niklas          | Environmental Archaeology                                       | University of York                                                  | United Kingdom of Great Britain and Northern Ireland (the) |
| Hausser, Jacques          | emeritus professor, ecology and evolution                       | University of Lausanne                                              | Switzerland                                                |
| Hautier, Lionel           | Researcher in Evolutionary Biology                              | Centre National de la Recherche Scientifique (CNRS)                 | France                                                     |
| Haux, Johannes            | PhD Candidate in Computer Vision                                | Heidelberg University                                               | Germany                                                    |
| Haveman, Rense            | Ecologist                                                       | Dutch Ministry of the Interior                                      | Netherlands (the)                                          |
| Havenga, Minette          | PhD candidate                                                   | University of Pretoria, Genetics department                         | South Africa                                               |
| Haverkamp, Alexander      | Entomology                                                      | Wageningen University                                               | Netherlands (the)                                          |
| Havord, Peter             | Petroleum Geologist                                             | Consultant                                                          | Australia                                                  |
| Hawkes, William           | PhD student in insect migration                                 | University of Exeter                                                | United Kingdom of Great Britain and Northern Ireland (the) |
| Hawkins, Heidi-Jayne      | Director of Research; and Hon. Research Associate               | Conservation South Africa; and University of Cape Town              | South Africa                                               |
| Haws, Cindy               | Wildlife Biologist                                              | Umpqua Community College                                            | United States of America (the)                             |
| Hay, Alistair             | Botany                                                          | Royal Botanic Gardens Sydney                                        | Australia                                                  |
| Hayat, Claude             | Professor Mathematics                                           | Universite Toulouse III IMT                                         | France                                                     |
| Hayden, Sue               | wildlife management and data analytics                          |                                                                     | United States of America (the)                             |
| Hayden, Anders            | Associate Professor, Political Science (Environmental Politics) | Dalhousie University                                                | Canada                                                     |
| Hayden, Mark              | MD, Paediatric Intensive Care                                   | Great Ormond St Hospital, London                                    | United Kingdom of Great Britain and Northern Ireland (the) |
| Haydon, Trent             | PhD Candidate, Marine Biology                                   | University of Technology Sydney, Climate Change Cluster             | Australia                                                  |
| Hayes, Chuck              | Wildlife Biologist                                              |                                                                     | United States of America (the)                             |
| Hayes, John               | Associate Professor of Geography                                | Salem State University                                              | United States of America (the)                             |
| Hayes, Floyd              | Professor of Biology, Zoologist                                 | Pacific Union College                                               | United States of America (the)                             |
| Hayes, Kenneth            | Professor of Physics                                            | Hillsdale College                                                   | United States of America (the)                             |
| Hayes, Loren              | Associate Professor                                             | University of Tennessee at Chattanooga                              | United States of America (the)                             |

|                     |                                                      |                                                                                         |                                                            |
|---------------------|------------------------------------------------------|-----------------------------------------------------------------------------------------|------------------------------------------------------------|
| Hayes, William      | Professor of Biology                                 | Loma Linda University                                                                   | United States of America (the)                             |
| Hays, Michelle      | PhD candidate                                        |                                                                                         | United States of America (the)                             |
| Hayward, David      | Visitor                                              | Australian National University                                                          | Australia                                                  |
| Hayward, Nathan     | Research Scientist - Geophysics                      | Geological Survey of Canada                                                             | Canada                                                     |
| Hayward, Matt       | Associate Professor of Conservation Biology          | University of Newcastle                                                                 | Australia                                                  |
| Hayward, Angela     | Researcher                                           | Angela Hayward                                                                          | United Kingdom of Great Britain and Northern Ireland (the) |
| Hayward, Alice      | Plant molecular biologist                            | The University of Queensland                                                            | Australia                                                  |
| Hayward, Kristen    | Conservation Genomics                                | Queen's University                                                                      | Canada                                                     |
| Haywood, Julia      | PhD Researcher                                       | University of Exeter - Biosciences                                                      | United Kingdom of Great Britain and Northern Ireland (the) |
| Hazel, Julia        | Adjunct Research Fellow                              | James Cook University                                                                   | Australia                                                  |
| He, Peng            | PhD candidate in Animal Behavior                     | Max Planck Institute of Animal Behavior                                                 | Germany                                                    |
| Head, Josephine     | Senior Researcher                                    | Earthwatch Europe                                                                       | United Kingdom of Great Britain and Northern Ireland (the) |
| Healey, Michael     | Professor emeritus (ecology/environmental science)   | University of British Columbia                                                          | Canada                                                     |
| Heames, Brennen     | Evolutionary Biologist                               | Institute for Evolution and Biodiversity                                                | Germany                                                    |
| Heaney, Lawrence    | Curator of Mammals                                   | Field Museum of Natural History                                                         | United States of America (the)                             |
| Heap, John          | Associate Professor                                  | University of Nottingham                                                                | United Kingdom of Great Britain and Northern Ireland (the) |
| Hearn, Alex         | Professor of Marine Biology                          | Universidad San Francisco de Quito                                                      | Ecuador                                                    |
| Heath, Martin       | MSc, Director, Energy Services                       | Basingstoke Energy Services Co-operative                                                | United Kingdom of Great Britain and Northern Ireland (the) |
| Heather, Freddie    | PhD Student                                          | Institute for Marine and Antarctic Studies                                              | Australia                                                  |
| Heatwole, Harold    | Adjunct Professor/Herpetologist                      | The University of New England                                                           | Australia                                                  |
| Heaver, Joseph      | Veterinarian                                         | Zoological Society of London                                                            | United Kingdom of Great Britain and Northern Ireland (the) |
| Hebdon, Chris       | Environmental Anthropology                           | Yale University                                                                         | United States of America (the)                             |
| Hébert, Marie-Pier  | PhD researcher                                       | McGill University                                                                       | Canada                                                     |
| Heck, Stephen       | PhD Candidate in Marine Ecology & Research Assistant | Stony Brook University                                                                  | United States of America (the)                             |
| Heckel, Gisela      | Professor/Biology-Marine Mammalogy                   | Centro de Investigacion Cientifica y de Educacion Superior de Ensenada, Baja California | Mexico                                                     |
| Heckelman, Amber    | Researcher/Consultant, Food Systems                  | University of British Columbia                                                          | Canada                                                     |
| heckendorn, katrina | PhD student                                          | Rhodes University                                                                       | United States of America (the)                             |
| Heckenroth, Alma    | PhD in Ecology                                       | Aix-Marseille Université, Université de Bretagne Occidentale                            | France                                                     |
| Heckmann, Ilja      | Biologist                                            | Leibniz Institute for Zoo and Wildlife Research (IZW)                                   | Germany                                                    |
| Heckmann, Tobias    | Senior Lecturer in Physical Geography                | Cath. University of Eichstaett-Ingolstadt                                               | Germany                                                    |
| Hector, Basile      | Researcher, hydrology                                | IRD                                                                                     | France                                                     |
| HEDDE, Mickael      | Researcher                                           | French National Institute for Agronomy                                                  | France                                                     |
| Hedeler, Barbara    |                                                      | Chalmers University of Technology                                                       | Sweden                                                     |

|                            |                                                      |                                                               |                                                            |
|----------------------------|------------------------------------------------------|---------------------------------------------------------------|------------------------------------------------------------|
| Hedger, Katherine          |                                                      | University of Exter                                           | United Kingdom of Great Britain and Northern Ireland (the) |
| Heeb, Luca                 | Climate Change Manager                               | CAB International                                             | Switzerland                                                |
| Heeb, Philipp              | Research Director                                    | CNRS / UPS                                                    | France                                                     |
| Heeren, Paul               | PHD student                                          | Center for Astronomy (ZAH) Heidelberg                         | Germany                                                    |
| Heesch, Svenja             | Phycology                                            | University of Rostock                                         | Germany                                                    |
| Hegarty, Bridget           | postdoctoral fellow (environmental engineering)      | University of Michigan                                        | United States of America (the)                             |
| Hege, Hans-Christian       | Head of Department Visual Data Analysis              | Zuse Institute Berlin (ZIB)                                   | Germany                                                    |
| Hegemann, Paul             | Medicine                                             | Gemeinschaftspraxis Dres.Hegemann/Franck                      | Germany                                                    |
| Hegemann, Ingeborg         | Adjunct Professor, Wetland Ecology                   | University of MA/Lowell                                       | United States of America (the)                             |
| Heggie-Gracie, Samuel      | Environmental Science Consultant                     | Tonkin & Taylor Ltd.                                          | New Zealand                                                |
| Heid, Joern                | Informatics                                          | University of Heidelberg                                      | Germany                                                    |
| Heidemann, Knut            | Research Group Leader                                | Max Planck Institute for Dynamics and Self-Organization       | Germany                                                    |
| Heiden, Gustavo            | Researcher                                           | Embrapa Clima Temperado                                       | Brazil                                                     |
| Heidenreich, Uwe           | Biology                                              | Universität Lüneburg                                          | Germany                                                    |
| Heiderich, Joleen          | PhD Candidate in Physical Oceanography               | MIT/WHOI Joint Program                                        | United States of America (the)                             |
| Heighton, Sean             | PhD student                                          | Université Paul Sabatier Toulouse III                         | France                                                     |
| Heiling, Jacob             | Research biologist - Ecology and pollination biology | Florida State University                                      | United States of America (the)                             |
| Heilmann, Zeno             | Geophysicist                                         | CRS4                                                          | Italy                                                      |
| Heindler, Franz Maximilian | PhD candidate                                        | KU Leuven                                                     | Belgium                                                    |
| Heinen, Robin              | PhD Candidate                                        | Netherlands Institute of Ecology (NIOO-KNAW)                  | Netherlands (the)                                          |
| Heinicke, Stefanie         |                                                      | Max Planck Institute for Evolutionary Anthropology            | Germany                                                    |
| Heinrich, Luise            | Department of Physics and Earth Sciences             | Jacobs University Bremen                                      | Germany                                                    |
| Heinrichs-Caldas, Waldir   | PhD Candidate                                        | INPA                                                          | Brazil                                                     |
| Heintz-Buschart, Anna      | Postdoctoral Researcher in Microbial Ecology         | Helmholtz Centre for Environmental Research GmbH - UFZ        | Germany                                                    |
| Heinze, Alan               | Production Ecology and Resource Conservation         | Wageningen UR                                                 | Mexico                                                     |
| Heise, Christian           | Physician in advanced training, Medicine             | Martin-Luther-University Halle-Wittenberg                     | Germany                                                    |
| Heisey, Steven             | Soil Microbiologist                                  | Graduate Student                                              | United States of America (the)                             |
| heitkonig, ignaa           | asst prof, ecology                                   | wageningen university                                         | Netherlands (the)                                          |
| Helbach, Jan               | Geoecologist                                         | Geobotany, University Freiburg                                | Germany                                                    |
| Held, Jenny                | PhD, Physics                                         | ETH Zürich                                                    | Switzerland                                                |
| Heleno, Ruben              | Principal investigator Ecology                       | University of Coimbra                                         | Portugal                                                   |
| Helfer, Kevin              | PhD Candidate                                        | Delft University of Technology                                | Netherlands (the)                                          |
| Helgen, Kristofer M.       | Professor of Biological Sciences                     | University of Adelaide                                        | Australia                                                  |
| Helgert, Sebastian         | PhD                                                  |                                                               | Germany                                                    |
| Hellemans, Simon           | PhD, F.R.S.-FNRS Research Fellow                     | Evolutionary Biology & Ecology, Université libre de Bruxelles | Belgium                                                    |
| Hellequin, Eve             | PhD                                                  |                                                               | France                                                     |
| Heller, Johannes           | Research and Teaching Assistant                      | Chair of Operations Management, University of Bayreuth        | Germany                                                    |

|                            |                                                               |                                                                         |                                                            |
|----------------------------|---------------------------------------------------------------|-------------------------------------------------------------------------|------------------------------------------------------------|
| Heller, Jens               | Project Scientist, Environmental Genomics and Systems Biology | Lawrence Berkeley National Lab                                          | United States of America (the)                             |
| Heller, Nicole             | Ecologist, Curator                                            | Carnegie Museum of Natural History                                      | United States of America (the)                             |
| Heller, Richard Scott      | Research Scientist                                            | Hagedorn Research Institute                                             | Portugal                                                   |
| Helleu, Quentin            | Postdoctoral fellow                                           | University of Lausanne                                                  | Switzerland                                                |
| Hellmann, Fernando         | Professor at Department of Public Health                      | Universidade Federal de Santa Catarina                                  | Brazil                                                     |
| Hellquist, C. Eric         | Associate Professor of Biological Sciences (Ecology)          | State University of New York Oswego                                     | United States of America (the)                             |
| Hellwig, Niels             | Postdoc / Environmental Science                               | Institute of Environmental Science and Geography, University of Potsdam | Germany                                                    |
| Helm, Barbara              | Professor of Biological Rhythms                               | University of Groningen                                                 | Netherlands (the)                                          |
| Helm, Aveliina             | Senior researcher in ecology                                  | University of Tartu                                                     | Estonia                                                    |
| Helmns, Dre                | Mechanical Engineering                                        | UC Berkeley                                                             | United States of America (the)                             |
| Helmstädter, Martin        | Biology                                                       | University of Freiburg                                                  | Germany                                                    |
| Helsens, Nicolas           | PhD Student, Microbiology                                     | INRA                                                                    | France                                                     |
| Hemami, Mahmoud-Reza       | Associate professor of conservation ecology                   | Isfahan University of Technology                                        | Iran (Islamic Republic of)                                 |
| Hemery, Youna              | Research scientist in Nutrition                               | Institute of Research for Development                                   | France                                                     |
| Heming, Neander            | Post Doc                                                      | Universidade Estadual de Santa Cruz                                     | Brazil                                                     |
| Hemmendinger, David        | professor emeitus of computer science                         | Union College                                                           | United States of America (the)                             |
| Hemming, Michael           | Oceanographic researcher                                      | University of New South Wales                                           | Australia                                                  |
| Hemptinne, Jean-Louis      | Professor of Ecology                                          | Université Fédérale Toulouse Midi-Pyrénées                              | France                                                     |
| Hemsley, Victoria          | Oceanography postdoc                                          | Queen Mary university of London                                         | United Kingdom of Great Britain and Northern Ireland (the) |
| Henault-Brunet, Vincent    | Assistant Professor of Astronomy                              | Saint Mary's University, Halifax                                        | Canada                                                     |
| Henckel, Laura             | Contractual researcher in ecology                             | Swedish University of Agricultural Science                              | Sweden                                                     |
| Hendawy, Mennatullah       | urban planning                                                | TU Berlin                                                               | Germany                                                    |
| Hendel, Anna-Lena          | PhD candidate/ Wildlife Ecology                               | University Freiburg                                                     | Germany                                                    |
| Henderson, Deanna          | Zoology                                                       | Minibeast Wildlife Trust                                                | Australia                                                  |
| Henderson, Lesley          | Invasive plants                                               | Agricultural Research Council                                           | South Africa                                               |
| Henderson, Alan            | Wildlife Manager                                              | Minibeast Wildlife                                                      | Australia                                                  |
| Henderson, Amanda          | DOE Watershed Function Scientific Focus Area, Field Manager   | Rocky Mountain Biological Laboratory                                    | United States of America (the)                             |
| Henderson, Laura           | Education for Sustainable Development                         | Charles University Environment Centre                                   | Czech Republic (the)                                       |
| Hendler, Gordon            | Curator                                                       | Natural History Museum of Los Angeles County                            | United States of America (the)                             |
| Hendlin, Yogi              | Environmental Philosopher and Public Health Scientist         | Erasmus University Rotterdam and University of California San Francisco | Netherlands (the)                                          |
| Hendrickson, Andy          | Clinical Pharmacist                                           |                                                                         | United States of America (the)                             |
| Hendrickx, Jan             | Professor Emeritus of Hydrology                               | New Mexico Tech                                                         | United States of America (the)                             |
| Hendrickx, Frederik        | Senior scientist                                              | Royal Belgian Institute of Natural Sciences                             | Belgium                                                    |
| Hener, Claudia             | PhD student in plant biology                                  | University of Tübingen                                                  | Germany                                                    |
| Henkanaththegedara, Sujana | Associate Professor of Biology                                | Longwood University                                                     | United States of America (the)                             |
| Henke, Jans                | PhD student                                                   |                                                                         | Netherlands (the)                                          |

|                                   |                                                        |                                                                                |                                                            |
|-----------------------------------|--------------------------------------------------------|--------------------------------------------------------------------------------|------------------------------------------------------------|
| Henke-von der Malsburg, Johanna   | PhD Candidate Behavioral Biology                       | German Primate Center (Leibniz Insitute) & Georg-August-Universitiy Goettingen | Germany                                                    |
| Henley, Sian                      | Lecturer in Marine Science                             | University of Edinburgh                                                        | United Kingdom of Great Britain and Northern Ireland (the) |
| Hennebelle, Patrick               | astrophysics                                           | CEA                                                                            | France                                                     |
| Hennequin, Sabine                 | Assistant Professor/Botany                             | Sorbonne Université                                                            | France                                                     |
| Henneresse, Thomas                | PhD                                                    |                                                                                | Belgium                                                    |
| Hennessey, Kelly                  | Biology Teaching Associate, PhD                        | University of Washington                                                       | United States of America (the)                             |
| Hennig, Benjamin                  | Professor of Geography                                 | University of Iceland                                                          | Iceland                                                    |
| Hennig, Joerg                     | Senior Lecturer                                        | University of Otago                                                            | New Zealand                                                |
| Henniger, Hans                    | Researcher in Forest Modelling                         | Helmholtz-Centre for Environmental Research                                    | Germany                                                    |
| Hennion, Françoise                | Researcher in Ecology                                  | CNRS                                                                           | France                                                     |
| Henrique de Frias Castro, Gustavo | Professor / Feed Analyses - Equine                     | Federal University of Jequitinhonha and Mucuri Valleys                         | Brazil                                                     |
| Henriques, Sergio                 | Chair of the IUCN Spider and Scorpion Specialist Group | Zoological Society London                                                      | United Kingdom of Great Britain and Northern Ireland (the) |
| Henry, Gregory                    | Professor                                              | University of British Columbia                                                 | Canada                                                     |
| Henry, Asegun                     | Associate Professor                                    | Massachusetts Institute of Technology                                          | United States of America (the)                             |
| Henry, Dominic                    | Ecologist                                              | University of Cape Town                                                        | South Africa                                               |
| Henschell, Max                    | Research Scientist/Ecologist                           | New York Natural Heritage Program                                              | United States of America (the)                             |
| Hensoldt, Agnieszka               | associate professor; social philosophy                 | University of Opole                                                            | Poland                                                     |
| Hepner, Elizabeth                 | Veterinarian                                           | Virginia Maryland College of Veterinary Medicine                               | United States of America (the)                             |
| Hérault, Bruno                    | Senior Scientist                                       | Cirad                                                                          | France                                                     |
| Herbeck, Johannes                 | Senior Researcher, Human Geography                     | Sustainability Research Center (artec), University of Bremen                   | Germany                                                    |
| Herbert, Betsy                    | Forest management/environmental studies                | Freelance writer                                                               | United States of America (the)                             |
| Herbert, David                    | Honorary Professor - Malacology                        | University of KwaZulu-Natal                                                    | South Africa                                               |
| Herbert, Robin                    | PhD Student Plant Biology                              | UC Berkeley                                                                    | United States of America (the)                             |
| Herbert, Horst                    | Phd Student Bioatomic 3d Printing                      | Leuphana University Lueneburg                                                  | Germany                                                    |
| Herbstritt, Barbara               | Hydrologist                                            | University                                                                     | Germany                                                    |
| Hercot, David                     | Public Health Specialist, Advisor                      | Ministry of Welfare, Health and Environment, Brussels Region, Belgium          | Belgium                                                    |
| Heredia, Eduardo                  | Physics                                                | CITEDEF                                                                        | Argentina                                                  |
| Heres, Melissa                    | Waterfront Assistant                                   | The School for Field Studies                                                   | Turks and Caicos Islands (the)                             |
| Hergoualc'h, Kristell             | Scientist                                              | Center for International Forestry Research (CIFOR)                             | Peru                                                       |
| Hering, Jenny                     | PhD student Biochemistry                               | Gothenburg University                                                          | Sweden                                                     |
| Hering, Fabio                     | MSc Geoscience                                         |                                                                                | Germany                                                    |
| Heringer, Gustavo                 | Post-doctoral researcher - Applied Ecology             | Universidade Federal de Lavras (UFLA)                                          | Brazil                                                     |
| Herman, Ivan                      | Senior Researcher, Computer Scientist                  |                                                                                | Netherlands (the)                                          |
| Herman, Jean-Paul                 | Neurobiology                                           | CNRS                                                                           | France                                                     |
| Herman, Ph.D., Maryann            | Associate Professor of Biology                         | St. John Fisher College                                                        | United States of America (the)                             |
| Hermann, Sharon                   | Ecologist                                              | Auburn University                                                              | United States of America (the)                             |

|                                |                                                                 |                                                                            |                                                            |
|--------------------------------|-----------------------------------------------------------------|----------------------------------------------------------------------------|------------------------------------------------------------|
| Herminghaus, Stephan           | Physicist, Professor, Director                                  | Max Planck Institute for Dynamics and Self-Organization, Göttingen         | Germany                                                    |
| Hernandez, Karina              | Biologist                                                       | Ecuador Ministry of Environment                                            | Ecuador                                                    |
| Hernandez, Jose M.             | Particle physicist                                              | CIEMAT                                                                     | Spain                                                      |
| Hernandez, Dana                | PhD Student in Environmental Engineering                        | UC Berkeley                                                                | United States of America (the)                             |
| Hernández, Laura               | Postdoc researcher                                              | INIA-CIFOR                                                                 | Spain                                                      |
| Hernandez Lucas, Simon         | Master of Science in Biology                                    |                                                                            | Belgium                                                    |
| Hernández Plaza, María Eva     |                                                                 | Institute for Sustainable Agriculture. Spanish National Resarch Council    | Spain                                                      |
| Hernandez Santin, Lorna        | Postdoctoral Research Fellow                                    | Centre for Mined Land Rehabilitation, University of Queensland             | Australia                                                  |
| Hernández Vázquez, Andrea      | Bióloga                                                         | UNAM                                                                       | Mexico                                                     |
| Hernandez-Lozano, Misha        | PhD student                                                     | UNAM                                                                       | Mexico                                                     |
| Hernández-Manrique, Olga Lucía | Head Social Science and Biodiversity Knowledge Program          | Alexander von Humboldt Biological Resources Research Institute             | Colombia                                                   |
| Hernández-Sandoval, Luis       | Botany Professor                                                | Facultad de Ciencias Naturales, Universidad Autónoma de Querétaro          | Mexico                                                     |
| Hernandez-Santana, Virginia    |                                                                 | IRNAS-CSIC                                                                 | Spain                                                      |
| Hernández-Trejo, Esmeralda     | Ciencia Forense                                                 | Universidad Nacional Autónoma de México                                    | Mexico                                                     |
| Hervann, Pierre-Yves           | PhD Marine Ecology                                              | IFREMER / AGROCAMPUS OUEST                                                 | France                                                     |
| Herpell, Johannes              | Microbiologist                                                  | University of Vienna                                                       | Austria                                                    |
| Herrando, Sergi                | Population ecology                                              | Catalan Ornithological Institute / CREAF                                   | Spain                                                      |
| Herremans, Marc                | Research Director                                               | Natuurpunt (nature conservation ngo)                                       | Belgium                                                    |
| Herrera, Cayetano              | PhD Student                                                     | University of the Balearic Islands                                         | Spain                                                      |
| Herrera, Santiago              | Deep-Sea Biologist                                              | Lehigh University                                                          | United States of America (the)                             |
| Herrera, Mercedes              | Researcher, fish biology and ecology                            | University of Córdoba (Spain)                                              | Spain                                                      |
| Herrera, Cinthya N.            | Astronomía, postdoc                                             | IRAM                                                                       | France                                                     |
| Herrera, Jose                  | Research staff - Physics                                        | Universidad de Los Andes                                                   | Venezuela (Bolivarian Republic of)                         |
| Herrera Paredes, Sur           | Postdoctoral fellow, Computational Biology                      | Stanford University                                                        | Mexico                                                     |
| Herrero, Mario                 | Chief Research Scientist                                        | CSIRO                                                                      | Australia                                                  |
| Herrero, Asier                 | Researcher: Forest Ecology                                      | University of Alcalá                                                       | Spain                                                      |
| HERRERO, MARTA                 | PHD STUDENT                                                     | INSTITUTE FOR GAME AND WILDLIFE RESEARCH                                   | Spain                                                      |
| Herrett, Scott                 | Environmental social researcher                                 | The James Hutton Institute                                                 | United Kingdom of Great Britain and Northern Ireland (the) |
| Herrmann, Maximilian           | PhD student/Environmental physics                               | IWR, Heidelberg University                                                 | Germany                                                    |
| Herrmann, Kathrin              | Veterinary Specialist in Animal Welfare Science, Ethics and Law | Johns Hopkins Bloomberg School of Public Health                            | United States of America (the)                             |
| Herron, Darryl                 | PhD Candidate - Forest Pathologist                              | Forestry and Agricultural Biotechnology Institute - University of Pretoria | South Africa                                               |
| Herrón, Pilar                  | Marine Biologist                                                | Fundación Ecomares                                                         | Colombia                                                   |
| Hersh, C. Mark                 | Aquatic Biologist                                               |                                                                            | United States of America (the)                             |
| Herten, Andreas                | Scientific Researcher                                           | Forschungszentrum Jülich                                                   | Germany                                                    |

|                             |                                                     |                                                                       |                                                               |
|-----------------------------|-----------------------------------------------------|-----------------------------------------------------------------------|---------------------------------------------------------------|
| Hervas, Guillermo           |                                                     | Museo Nacional de C Naturales                                         | Spain                                                         |
| Hervías-Parejo, Sandra      | Postdoctoral researcher                             | IMEDEA (UIB-CSIC)                                                     | Spain                                                         |
| Herzog, Laura Mae J.        | PostDoc / political science                         | Institute of Environmental Systems Research,<br>University Osnabrück  | Germany                                                       |
| Herzog, Sebastian           | Scientific Director                                 | Asociación Armonía                                                    | Bolivia (Plurinational State of)                              |
| Herzon, Iryna               | adjunct professor                                   | University of Helsinki                                                | Finland                                                       |
| Hes, Edwin                  | Lecturer in Environmental Systems Analysis          | IHE Delft Institute for Water Education                               | Netherlands (the)                                             |
| Heslip, Tim                 |                                                     | Simon Fraser University                                               | Canada                                                        |
| Hesse, Elze                 |                                                     | University of Exeter                                                  | United Kingdom of Great Britain<br>and Northern Ireland (the) |
| Hestvik, Arild              | Associate professor                                 | University of Delaware                                                | United States of America (the)                                |
| Hettwer Giehl, Eduardo Luis | Professor / Ecology                                 | Federal University of Santa Catarina                                  | Brazil                                                        |
| Hettyey, Attila             | researcher, life sciences                           | MTA ATK NÖVI                                                          | Hungary                                                       |
| Heuchel, Franz              | PhD student in Acoustical Engineering               | Technical University of Denmark                                       | Denmark                                                       |
| Heuertz, Myriam             | Research Scientist                                  | INRA                                                                  | France                                                        |
| Heurich, Marco              | Wildlife Ecology and Conservation Biology           | University of Freiburg                                                | Germany                                                       |
| Heussler, Carina Desirée    | PhD cand.                                           | University of Innsbruck                                               | Austria                                                       |
| Hewitt, Chad                | Professor and Director, Biosecurity Research Centre | Murdoch University                                                    | Australia                                                     |
| Hewitt, Lorraine            | Visiting Research Associate                         | Newcastle University                                                  | United Kingdom of Great Britain<br>and Northern Ireland (the) |
| Heymann, Eckhard W.         | Senior researcher & Adjunt professor                | Deutsches Primatenzentrum - Leibniz-Institut für<br>Primatenforschung | Germany                                                       |
| Heymans, Nicole             | Retired Professor, Polymer Physics                  | Universite Libre de Bruxelles                                         | Belgium                                                       |
| Heynen, Jan                 | Physics Engineer (retired)                          | (na)                                                                  | Canada                                                        |
| hibit, joshua               | PhH candidate, dept. of Botany                      | University of Hawaii at Manoa                                         | United States of America (the)                                |
| Hicks, Klara                | Doctor                                              | Great Western Hospital                                                | United Kingdom of Great Britain<br>and Northern Ireland (the) |
| Hicks, Thurston C           | Primatology                                         | University of Warsaw                                                  | Poland                                                        |
| Hidalgo-Silva, Hugo         | Computer Science Researcher                         | CICESE                                                                | Mexico                                                        |
| Hidrovo, Andrei             | Post doctoral researcher                            | CESAM, DAO, University of Aveiro                                      | Portugal                                                      |
| Hiebenthal, Claas           | Marine Ecology                                      | GEOMAR Helmholtz-Centre for Ocean Research Kiel                       | Germany                                                       |
| Hiebert, Laurel             | Postdoctoral Fellow                                 | Universidade de São Paulo                                             | Brazil                                                        |
| Hielkema, Auke              | Independent biodiversity researcher                 |                                                                       | Suriname                                                      |
| Hietala-Henschell, Katie    | Conservation Biologist                              | The Xerces Society                                                    | United States of America (the)                                |
| Hietz, Peter                | Professor                                           | University of Natural Resources and Life Sciences                     | Austria                                                       |
| Higgins, Tim                | Chemistry                                           | National University of Ireland Galway                                 | Ireland                                                       |
| Higgins, Sandra             | Psychologist                                        | Go Vegan World                                                        | Ireland                                                       |
| Higgs, Nicholas             | Director                                            | Cape Eleuthera Institute                                              | Bahamas (the)                                                 |
| Hijar, Martha               | Senior researcher                                   | Fundación Entornos AC                                                 | Mexico                                                        |
| Hik, David                  | Professor of Ecology                                | Simon Fraser University                                               | Canada                                                        |
| Hilaire, Samuel             | Research Technician                                 | Tour du Valat - Research Institute                                    | France                                                        |
| Hilberg, Laura              | Scientist                                           | EcoAdapt                                                              | United States of America (the)                                |

|                        |                                                                        |                                                                 |                                                            |
|------------------------|------------------------------------------------------------------------|-----------------------------------------------------------------|------------------------------------------------------------|
| Hildebrand, Peter      | Director, Earth Sciences, Emeritus                                     | NASA Goddard Space Flight Center                                | United States of America (the)                             |
| Hilgen, Frits          | Associate Professor                                                    | Utrecht University                                              | Netherlands (the)                                          |
| Hill, Jon              | Senior Lecturer                                                        | University of York                                              | United Kingdom of Great Britain and Northern Ireland (the) |
| Hill, Louise           | Scientific advisor on tree health                                      | Department for the Environment, Food and Rural Affairs (UK)     | United Kingdom of Great Britain and Northern Ireland (the) |
| Hill, Trevor           | Geography                                                              | University of KwaZulu-Natal                                     | South Africa                                               |
| Hill, Michael          | Emeritus Professor                                                     | University of North Dakota                                      | Australia                                                  |
| Hill, Gregory          | Professor of Mathematics and Environmental Studies                     | University of Portland                                          | United States of America (the)                             |
| Hill, Jaclyn           | Research Scientist                                                     | Fisheries and Oceans Canada                                     | Canada                                                     |
| Hill, Tessa            | Professor, Earth & Planetary Sciences                                  | UC Davis                                                        | United States of America (the)                             |
| Hiller, Christina      | Conservation Biologist                                                 |                                                                 | South Africa                                               |
| Hilliou, Frederique    | Research Engineer/ Bioinformatics                                      | INRA                                                            | France                                                     |
| Hiltbrunner, Andreas   | Professor of Molecular Plant Physiology                                | University of Freiburg                                          | Germany                                                    |
| Hilts, Angus           | PhD student in microbiology                                            | University of Vienna                                            | Austria                                                    |
| Hiltunen, Markus       | PhD student of Biology                                                 | Uppsala University                                              | Sweden                                                     |
| Himes Boor, Gina       | Assistant Research Professor in Ecology                                | Montana State University                                        | United States of America (the)                             |
| Hinckley, Arlo         | Evolutionary Biologist                                                 | Estación Biológica de Doñana-CSIC                               | Spain                                                      |
| Hingamp, Pascal        | Life Scientist, Associate Professor                                    | Aix-Marseille Université                                        | France                                                     |
| Hingray, Benoit        | Researcher                                                             | CNRS                                                            | France                                                     |
| Hinners, Jana          | Postdoc in Biology                                                     | University of Edinburgh                                         | United Kingdom of Great Britain and Northern Ireland (the) |
| Hinrichs, Sandrine     | Master of Science student in Psychology                                | Georg-August-University Goettingen                              | Germany                                                    |
| hintzy, frederique     | phD ,                                                                  | université savoie mont-blanc                                    | France                                                     |
| Hinz, Harriet          | Director of CABI Switzerland                                           | CABI                                                            | Switzerland                                                |
| Hipólito, Dário        | Research fellow                                                        | Universidade de Aveiro                                          | Portugal                                                   |
| Hiraldó, Fernando      | Research Professor Emeritus                                            | Estación Biológica de Doñana CSIC                               | Spain                                                      |
| Hirasuna, Thomas       | Food Science & Technology (PhD), Registered Professional Engineer (NY) |                                                                 | United States of America (the)                             |
| Hirota, Marina         | Assistant Professor                                                    | Federal University of Santa Catarina                            | Brazil                                                     |
| Hirsch, Ann            | Distinguished Professor                                                | UCLA                                                            | United States of America (the)                             |
| Hirschinger, Julien    | PhD candidate Animal Health                                            | Ecole Nationale Vétérinaire de Toulouse                         | France                                                     |
| Hirschkind, Lynn       | Anthropology                                                           |                                                                 | Ecuador                                                    |
| Hirst, Catherine       | Postdoctoral Researcher                                                | Universite Catholique du Louvain                                | Belgium                                                    |
| Hita Garcia, Francisco | Staff Scientist                                                        | Okinawa Institute of Science and Technology Graduate University | Japan                                                      |
| Hively, Dean           | Physical Scientist                                                     | may not declare for this purpose                                | United States of America (the)                             |
| Hixon, Mark            | Hsiao Endowed Professor of Marine Biology                              | University of Hawaii                                            | United States of America (the)                             |
| Hloch, Sergej          | Senior researcher/research on waterjetting                             | Institute of Geonics of the CAS                                 | Czech Republic (the)                                       |
| Hlusko, Leslea         | Professor of Integrative Biology                                       | University of California Berkeley                               | United States of America (the)                             |
| Hmiel, Andrew          | Physicist, ASTM Member                                                 | Solar Light Co. Inc.                                            | United States of America (the)                             |
| HNIA, Karim            | Researcher                                                             | INSERM                                                          | France                                                     |

|                       |                                                                 |                                               |                                                            |
|-----------------------|-----------------------------------------------------------------|-----------------------------------------------|------------------------------------------------------------|
| Ho, Maureen           |                                                                 | Griffith University                           | Australia                                                  |
| Ho, Ming-Jay          | Research Specialist                                             | Biodiversity Research Center/ Academia Sinica | Taiwan                                                     |
| Hoareau, Yves         | Research Scientist in Conservation Biology                      | University of Washington                      | United States of America (the)                             |
| Hoban, Sean           | Conservation Biology                                            | The Morton Arboretum                          | United States of America (the)                             |
| Hobbs, Jethro         | Postgraduate research student, upland vegetation ecology        | Durham University                             | United Kingdom of Great Britain and Northern Ireland (the) |
| Hoborn, Donald        | Biodiversity informatician                                      |                                               | Australia                                                  |
| Hobkirk, Elana        | Postgraduate researcher, Behavioural Ecology                    | Durham University                             | United Kingdom of Great Britain and Northern Ireland (the) |
| Hocevar, Sara         | Marine biologist                                                | University of Jyväskylä                       | Finland                                                    |
| Höch, Rebekka         | PhD Candidate Evolutionary Developmental Biology                | University of Konstanz                        | Germany                                                    |
| Hochberg, Michael     | Research Director                                               | Centre National de la Recherche Scientifique  | France                                                     |
| Hochkirch, Axel       | Associate Professor / Biodiversity                              | Trier University                              | Germany                                                    |
| Hock, Robert          | PhD, Cell- and Developmental Biology                            | University of Würzburg                        | Germany                                                    |
| Höckendorff, Stefanie |                                                                 | University of Konstanz                        | Germany                                                    |
| Hocking, Sophie       |                                                                 | Swansea University                            | United Kingdom of Great Britain and Northern Ireland (the) |
| Hockings, Marc        | Emeritus Professor                                              | University of Queensland                      | Australia                                                  |
| Hódar, José A.        | Full Professor, Ecology                                         | University of Granada                         | Spain                                                      |
| Hodgins, Nicola       | Marine Biologist                                                | Whale and Dolphin Conservation                | United Kingdom of Great Britain and Northern Ireland (the) |
| Hodgson, Emma         | Postdoctoral Researcher, Ecology                                | Simon Fraser University                       | Canada                                                     |
| Hodgson, Christopher  | Research Scientist in Entomology                                | National Museum of Wales                      | United Kingdom of Great Britain and Northern Ireland (the) |
| Hodgson, Dave         | Professor of Ecology                                            | University of Exeter                          | United Kingdom of Great Britain and Northern Ireland (the) |
| Hodson, Dan           | Research Scientist                                              | University of Reading                         | United Kingdom of Great Britain and Northern Ireland (the) |
| Hodum, Peter          | Associate Professor, Conservation Biology                       | University of Puget Sound                     | United States of America (the)                             |
| Hoek van Dijke, Anne  |                                                                 | Wageningen University                         | Netherlands (the)                                          |
| Hoekstra, Marieke     | Research Associate                                              | Imperial College                              | United Kingdom of Great Britain and Northern Ireland (the) |
| Hoekstra, Stephanie   | Professor, Climate Sciences                                     | Furman University                             | United States of America (the)                             |
| Hoelzel, Rus          | Professor                                                       | Durham University                             | United Kingdom of Great Britain and Northern Ireland (the) |
| Hof, anouschka        | Assistant professor Ecology and nature Conservation             | Wageningen university                         | Netherlands (the)                                          |
| Hof, Christian        | Junior Research Group Leader; biodiversity science              | Technical University of Munich                | Germany                                                    |
| Hofer, Stefan         | Climate researcher                                              | University of Bristol                         | United Kingdom of Great Britain and Northern Ireland (the) |
| Hofer, Heribert       | Director, zoology, behavioural ecology, conservation of mammals | Leibniz Institute for Zoo & Wildlife Research | Germany                                                    |
| Höfer, Hubert         | Head of Biosciences Department                                  | State Museum of Natural History Karlsruhe     | Germany                                                    |
| hoffman, peter        | emeritus mahematics professor                                   | University of Waterloo                        | Canada                                                     |

|                         |                                                            |                                                                               |                                                            |
|-------------------------|------------------------------------------------------------|-------------------------------------------------------------------------------|------------------------------------------------------------|
| Hoffman, Rosemary       | Adjunt Professor of Zoology                                | Weber State University                                                        | United States of America (the)                             |
| Hoffman, Melanie        | Chemistry                                                  |                                                                               | Canada                                                     |
| Hoffman, Tali           | PhD Zoology                                                | University of Cape Town                                                       | South Africa                                               |
| Hoffman, Jennifer       | Associate Professor, Physics & Astronomy                   | University of Denver                                                          | United States of America (the)                             |
| Hoffman, Daniel         | Graduate Student, Soil Ecology and Agricultural Ecology    | Michigan State University                                                     | United States of America (the)                             |
| Hoffman, Ian            | Research Scientist, Nuclear Engineering                    | Health Canada                                                                 | Canada                                                     |
| Hoffmann, Karl          | PhD Student                                                | Max Planck Institute of Molecular Cell Biology and Genetics, Dresden, Germany | Germany                                                    |
| Hoffmann, Linn          | Senior Lecturer, Marine Botany                             | University of Otago                                                           | New Zealand                                                |
| Hoffmann, Rene          | Head of the microanalytical laboratories / Palaeontologist | Ruhr-Universitaet Bochum                                                      | Germany                                                    |
| Hoffmann, Dirk          | Research Engineer / Physics                                | CNRS                                                                          | France                                                     |
| Hoffmann, Michael       | Professor                                                  | Cornell University                                                            | United States of America (the)                             |
| Hoffmann, Antoine       | PhD student in insect neuroethology                        | Max Planck Institute for Animal Behavior & University of Konstanz             | Germany                                                    |
| Hoffmann, Samuel        | Biogeography                                               | University of Bayreuth                                                        | Germany                                                    |
| Hoffmann, Ilse          | Research Associate Behavioural Ecology                     | Department of Behavioural Biology, Univ. of Vienna                            | Austria                                                    |
| Hoffmann, Andre         | Biologist                                                  | Universidade Federal Fluminense                                               | Brazil                                                     |
| HOFFMANN, RODOLFO       | Senior Professor                                           | University of São Paulo                                                       | Brazil                                                     |
| Hoffner, Guylaine       | Academic Researcher in Neuroscience                        |                                                                               | France                                                     |
| Hofhansl, Florian       | Researcher                                                 | IIASA                                                                         | Austria                                                    |
| Höfle, Ursula           | Research professor avian diseases                          | Universidad de Castilla - La Mancha                                           | Spain                                                      |
| Hofmann, Erich          | PhD Student - Biological Sciences                          | Clemson University                                                            | United States of America (the)                             |
| Hofmeister, Mirella     | Biologist                                                  | University Kassel                                                             | Germany                                                    |
| Hofmeyr, Sally          | Ecology, ornithology                                       | University of Cape Town                                                       | South Africa                                               |
| Hogan, J. Aaron         | Ph.D. Student                                              | Florida International University                                              | United States of America (the)                             |
| Hogan, Patrick          | Earth Scientist                                            | NASA Emeritus                                                                 | United States of America (the)                             |
| Hoggett, Richard        | Research Manager, Energy Policy                            | University of Exeter                                                          | United Kingdom of Great Britain and Northern Ireland (the) |
| Hohenberger, Annette    | Senior Lecturer/Cognitive Science                          | Osnabrueck University, Institute of Cognitive Science                         | Germany                                                    |
| Hohenlohe, Paul         | Associate Professor, Biological Sciences                   | University of Idaho                                                           | United States of America (the)                             |
| Hohensee, Christiane    | Biologist, M Sc. Toxicology                                | NGO                                                                           | Germany                                                    |
| Hohenwarter, Gerhard    | Meteorologist                                              | ZAMG - Zentralanstalt fuer Meteorologie und Geodynamik                        | Austria                                                    |
| Höhn, Christoph         | Paediatrician                                              |                                                                               | Germany                                                    |
| Højlund Pedersen, Stine | Research scientist                                         | Colorado State University and University of Alaska Anchorage                  | United States of America (the)                             |
| Hokan, May              | Programm Manager Conservation / Veterinarian               | WWF Germany                                                                   | Germany                                                    |
| Holding, Stephen        | Consultant Clinical Scientist & Honorary Professor         | Hull University Hospitals NHS Trust & Hull York Medical School                | United Kingdom of Great Britain and Northern Ireland (the) |

|                               |                                                         |                                                                                                       |                                                            |
|-------------------------------|---------------------------------------------------------|-------------------------------------------------------------------------------------------------------|------------------------------------------------------------|
| Holding, Thomas               | Postdoctoral Research Associate                         | University of Exeter                                                                                  | United Kingdom of Great Britain and Northern Ireland (the) |
| Holenstein, Kathrin           | PhD student                                             | University Montpellier /CNRS                                                                          | France                                                     |
| Holl, Karen                   | Professor of Environmental Studies                      | University of California, Santa Cruz                                                                  | United States of America (the)                             |
| Holla, Prasida                | Postdoc, Immunogenetics                                 | National Institutes of Health                                                                         | United States of America (the)                             |
| Hollibaugh, James             | Distinguished Research Professor of Marine Sciences     | University of Georgia                                                                                 | United States of America (the)                             |
| Hollingsworth, Margaret       | Associate Professor Emeritus                            | University at Buffalo                                                                                 | United States of America (the)                             |
| Hollins, John                 | Ph. D. Biophysics                                       | Canadian Association for the Club of Rome                                                             | Canada                                                     |
| Hollister, Robert             | Biology Department                                      | Grand Valley State University                                                                         | United States of America (the)                             |
| Hollmann, Verena              | PhD student                                             | Hochschule Geisenheim                                                                                 | Germany                                                    |
| Hollyer, Justine              | PhD Statistics                                          |                                                                                                       | United Kingdom of Great Britain and Northern Ireland (the) |
| Holm, Federico                | Graduate Research Associate, Env. and Natural Resources | The Ohio State University                                                                             | United States of America (the)                             |
| Holmern, Tomas                | PhD - Biology                                           | Norwegian University of Science and Technology (NTNU)                                                 | Norway                                                     |
| Holmes, Richard               | Professor Emeritus of Biology                           | Dartmouth College                                                                                     | United States of America (the)                             |
| Holmes, patricia              | Ecological Science                                      | Stellenbosch University, Centre For Invasion Biology And Conservation Ecology & Entomology Department | South Africa                                               |
| Holmes, Glen                  | Marine Scientist                                        |                                                                                                       | Australia                                                  |
| Holmes, Ann                   | PhD Student, Ecology                                    | University of California-Davis                                                                        | United States of America (the)                             |
| Holmes, MD, DrPH, Michelle D. | Associate Professor of Medicine & Epidemiology          | Harvard University                                                                                    | United States of America (the)                             |
| Holmgren, Sara                | Researcher in Environmental Communication               | Swedish University of Agricultural Sciences                                                           | Sweden                                                     |
| Holmquist, Gunnar             | MD                                                      | Group Health Cooperative                                                                              | United States of America (the)                             |
| Hölscher, Katharina           | Senior Researcher                                       | DRIFT                                                                                                 | Netherlands (the)                                          |
| Holt, Donna                   | medical doctor                                          |                                                                                                       | United Kingdom of Great Britain and Northern Ireland (the) |
| Holthuijzen, Wieteke          | NSF Graduate Fellow                                     | Northern Illinois University                                                                          | United States of America (the)                             |
| Holthuis, Joost               | Professor of Molecular Cell Biology                     | University of Osnabrueck                                                                              | Germany                                                    |
| Holtzum, Charlotte            | Biology                                                 |                                                                                                       | Germany                                                    |
| Holubová, Michaela            | PhD student                                             | Czech academy of Sciences                                                                             | Czech Republic (the)                                       |
| Holveck, Marie-Jeanne         | Postdoc Behavioural Ecology                             | CEFE-CNRS                                                                                             | France                                                     |
| Holwerda, Benne               | Associate Professor in Astronomy                        | University of Louisville                                                                              | United States of America (the)                             |
| Holz, Joachim                 | Dr. rer. nat (Physicist)                                | Siemens AG                                                                                            | Germany                                                    |
| Holzhauer, Sascha             | System Science                                          | University of Kassel                                                                                  | Germany                                                    |
| Homberger, Dominique          | Alumni Professor, Dept of Biological Sciences           | Louisiana State Universities                                                                          | United States of America (the)                             |
| Homeier, Juergen              | Tropical Plant Ecology                                  | University of Goettingen                                                                              | Germany                                                    |
| Homsak, Marko                 | Head of EMS; Chem. Eng.                                 | Production company                                                                                    | Slovenia                                                   |
| Homsak, Miha                  | PhD candidate                                           | The Francis Crick Institute                                                                           | United Kingdom of Great Britain and Northern Ireland (the) |
| Honan, Amy                    | Lecturer in Biology                                     | Western Colorado University                                                                           | United States of America (the)                             |

|                         |                                                                               |                                                               |                                                            |
|-------------------------|-------------------------------------------------------------------------------|---------------------------------------------------------------|------------------------------------------------------------|
| Honegger, Matthias      | Research Associate, Environmental and Political Sciences                      | University of Utrecht, IASS and Perspectives Climate Research | Germany                                                    |
| Höner, Oliver           | Senior Scientist, Evolutionary Ecology, Head Ngorongoro Hyena Project         | Leibniz Institute for Zoo and Wildlife Research               | Germany                                                    |
| Honorio, Romain         | PhD Student in Evolutionary Ecology                                           | Sorbonne Université                                           | France                                                     |
| Honrado, Carlos         | Postdoctoral Research Associate                                               | University of Virginia                                        | United States of America (the)                             |
| Hons, Michael           | Scientist                                                                     | EMBL                                                          | France                                                     |
| Hood AM, Prof David A   | Adjunct Professor, Environmental engineering, sustainability, climate science | University of Queensland                                      | Australia                                                  |
| Hoogesteyn, Almira      | Environmental toxicologist                                                    | Centro de Investigación y de Estudios Avanzados del IPN       | Mexico                                                     |
| Hoogmoed, Marinus       | Guest Researcher                                                              | Museu Paraense Emilio Goeldi                                  | Brazil                                                     |
| Hooijmeijer, Jos        | ecologist                                                                     | University of Groningen                                       | Netherlands (the)                                          |
| Hooke, Rachel           | Marine Biologist                                                              | University of Southampton                                     | United Kingdom of Great Britain and Northern Ireland (the) |
| Hooke, Roger            | Research Professor                                                            | University of Maine                                           | United States of America (the)                             |
| Hooker, Sascha          | Professor                                                                     | University of St Andrews                                      | United Kingdom of Great Britain and Northern Ireland (the) |
| Hopfenmüller, Sebastian | PHD Student                                                                   | University of Würzburg                                        | Germany                                                    |
| Hopkins, Stephen        | Physics Researcher (Retired 2017)                                             | Durham University                                             | United Kingdom of Great Britain and Northern Ireland (the) |
| Hoppe, Theresa          | Master student in physics                                                     | University of Göttingen                                       | Germany                                                    |
| Hoppe, Björn            | Senior scientist - Forest pathology                                           | Julius Kühn-Institut                                          | Germany                                                    |
| Hora, Karla Emmanuela   | Researcher                                                                    | Goias Federal University                                      | Brazil                                                     |
| Horak, Julia            | Terrestrial Ecology                                                           | University Vienna                                             | Austria                                                    |
| Hordoir, Robinson       | Researcher                                                                    | Institute of Marine Research                                  | Norway                                                     |
| Horne, Jeremy           | Program Committee member and consultant                                       | International Institute of Informatics and Systemics          | United States of America (the)                             |
| Hornic, Betty           | PhD student                                                                   | Groningen University                                          | Netherlands (the)                                          |
| Horodyskyj, Ulyana      | scientist                                                                     | Science in the Wild                                           | United States of America (the)                             |
| Horrell, Sam            | Postdoc in Structural Biology                                                 | Universitaet Hamburg                                          | Germany                                                    |
| Horrocks, Nicholas      |                                                                               | University of Cambridge                                       | United Kingdom of Great Britain and Northern Ireland (the) |
| Horst, Christina        | Masters Student                                                               | University of British Columbia                                | Canada                                                     |
| Horta, Paulo            | Associate Professor                                                           | UNiversidade Federal de Santa Catarina                        | Brazil                                                     |
| HORTA, Quentin          | PhD student                                                                   | University of Iceland                                         | Iceland                                                    |
| Hortal, Joaquín         | Tenured Scientist                                                             | Museo Nacional de Ciencias Naturales (MNCN-CSIC)              | Spain                                                      |
| Hortas, Francisco       | University Professor of Biology                                               | University of Cádiz                                           | Spain                                                      |
| Hörtnagl, Lukas         | Data Scientist                                                                | ETH Zurich                                                    | Switzerland                                                |
| Horton, Richard John    | Consultant                                                                    | Tropical Projects                                             | United Kingdom of Great Britain and Northern Ireland (the) |
| Horton, Tammy           | Research Scientist, Marine Biology                                            | National Oceanography Centre, Southampton                     | United Kingdom of Great Britain and Northern Ireland (the) |

|                            |                                                         |                                                                                                                            |                                                            |
|----------------------------|---------------------------------------------------------|----------------------------------------------------------------------------------------------------------------------------|------------------------------------------------------------|
| Horton, David              | Palaeoecology (Retired)                                 | Australian Institute of Aboriginal & Torres Strait Islander Studies (until 1998)                                           | Australia                                                  |
| Horvath, Anna              | General Coordinator                                     | Instituto Montebello, Centro Interdisciplinario para el Fomento del Desarrollo Integral en la Frontera Sur de México, A.C. | Mexico                                                     |
| Horváth, Zsófia            | Research fellow, ecology                                | Centre for Ecological Researchm Balaton Limnological Institute                                                             | Hungary                                                    |
| Hosenfeld, Friedhelm       | Computer Scientist                                      | DigSyLand                                                                                                                  | Germany                                                    |
| Hosking, Robert            | Medical Practitioner                                    |                                                                                                                            | Australia                                                  |
| Hoskisson, Paul            | Professor of Molecular Microbiology                     | University of Strathclyde                                                                                                  | United Kingdom of Great Britain and Northern Ireland (the) |
| Hosley, Mark               | Biolgcal Sciences - Retired                             | Retired                                                                                                                    | United States of America (the)                             |
| Hossie, Thomas             | Assistant Professor (Biology)                           | Trent University                                                                                                           | Canada                                                     |
| Hough-Snee, Nate           | Ecologist                                               | Meadow Run Environmental LLC                                                                                               | United States of America (the)                             |
| Houle, Faith               | Professor/Microbiology                                  | Johns Hopkins University                                                                                                   | United States of America (the)                             |
| Houle, Mark                | Climate Scientist                                       | The Royal Institution of Great Britain                                                                                     | United Kingdom of Great Britain and Northern Ireland (the) |
| Hourdez, Stephane          | Researcher                                              | CNRS                                                                                                                       | France                                                     |
| Houska, Tobias             | Postdoc                                                 | Justus Liebig University Giessen                                                                                           | Germany                                                    |
| Houssaye, Alexandra        | Researcher                                              | CNRS                                                                                                                       | France                                                     |
| Houtman, Rachel            | Faculty Research Assistant                              | Oregon State University                                                                                                    | United States of America (the)                             |
| Houwman, Evert             | Lecturer, physics                                       | University of Twente                                                                                                       | Netherlands (the)                                          |
| Houwman, Joseline          | Biochemistry                                            | Utrecht University                                                                                                         | Netherlands (the)                                          |
| How, Penelope              | Post-Doctoral Researcher                                | University of York                                                                                                         | United Kingdom of Great Britain and Northern Ireland (the) |
| Howard, Ryan               | Graduate Student                                        | Imperial College London                                                                                                    | United Kingdom of Great Britain and Northern Ireland (the) |
| Howard, Andrew             | PhD Student, Biochemistry                               | University of Waikato                                                                                                      | New Zealand                                                |
| Howard, Alexandra          | Researcher in avian biology                             | VulPro NGO                                                                                                                 | South Africa                                               |
| Howe, Logan                | Physicist                                               | National Institute of Standards and Technology                                                                             | United States of America (the)                             |
| Howe, Kristy               | Wildlife Biologist                                      | Nevada Natural Heritage Program                                                                                            | United States of America (the)                             |
| Hoyo, Carlos               | Professor/Pharmacology                                  | Cinvestav-IPN                                                                                                              | Mexico                                                     |
| Hoyle, Stephen             | Scientist Plant pathology and biocontrol                | The NZ Institute of Plant and Food Research                                                                                | New Zealand                                                |
| Hrabalkova, Lenka          | Postdoctoral researcher                                 | Institute of Immunology and Infection Research                                                                             | United Kingdom of Great Britain and Northern Ireland (the) |
| Hrabe de Angelis, Isabella | PhD Candidate in Atmospheric Chemistry and Microbiology | Max Planck Institute for Chemistry                                                                                         | Germany                                                    |
| Hrachowitz, Markus         | Associate Professor Hydrology                           | Delft University of Technology                                                                                             | Netherlands (the)                                          |
| Hrbek, Tomas               | Professor                                               | Federal University of Amazonas                                                                                             | Brazil                                                     |
| Hrivnák, Richard           | senior researcher, vegetation ecology                   | Institute of Botany, Plant Science and Biodiversity Center, Slovak Academy of Sciences                                     | Slovakia                                                   |
| HSU, JIH-YIH               | Professor                                               | National Chung Hsing University                                                                                            | Taiwan                                                     |
| HSU, Gloria Kuang-Jung     | Professor                                               | National Taiwan University                                                                                                 | Taiwan                                                     |

|                        |                                                                       |                                                      |                                                            |
|------------------------|-----------------------------------------------------------------------|------------------------------------------------------|------------------------------------------------------------|
| Hu, Darcy              | Ecologist                                                             | National Park Service, retired                       | United States of America (the)                             |
| Huacuz, Rafael         | Cordinador de la Maestría en Planeación y Ordenamiento Territorial    | Universidad Latina de America                        | Mexico                                                     |
| Huang, Danwei          |                                                                       | National University of Singapore                     | Singapore                                                  |
| Huaranca, Juan Carlos  | Ph.D Candidate                                                        | Universidad Mayor de San Simon                       | Bolivia (Plurinational State of)                           |
| Huba, Mikulas          | prof. ,geographer                                                     | Institute of Geography, Slovak Academy of Sciences   | Slovakia                                                   |
| Hubbe, Alex            | Professor                                                             | Universidade Federal da Bahia                        | Brazil                                                     |
| Huber, Martina         |                                                                       | Utrecht University                                   | Netherlands (the)                                          |
| Huber, Djuro           | Professor emeritus                                                    | Faculty of Veterinary Medicine, Zagreb               | Croatia                                                    |
| Huber, Martin          | PhD in Environmental Social Sciences                                  | Universität Bern                                     | Switzerland                                                |
| Huber, Bernhard A.     |                                                                       | Alexander Koenig Zoological Research Museum          | Germany                                                    |
| Huberman, Joel         | Professor Emeritus                                                    | Roswell Park Cancer Institute                        | United States of America (the)                             |
| Hubin, Norbert         | Physicist                                                             | European Southern Observatory                        | Germany                                                    |
| Hubler, Shannon        | Aquatic Ecologist                                                     | Oregon Department of Environmental Quality           | United States of America (the)                             |
| Hubot, Nathan          | PhD student in ocean and hearth sciences                              | University of Southampton                            | United Kingdom of Great Britain and Northern Ireland (the) |
| Hubrich, Hanna         | PhD student - chemistry                                               | Georg-August University Göttingen                    | Germany                                                    |
| Huchard, Elise         | Researcher in ecology and evolutionary biology                        | CNRS                                                 | France                                                     |
| Hudcová, Magdalena     | Medical doctor, Oncologist                                            | Palacky University Olomouc                           | Czech Republic (the)                                       |
| Huddleston, Chad       | Instructor, Anthropology                                              | Southern Illinois University, Edwardsville           | United States of America (the)                             |
| Hudiburg, Tara         | Associate Professor                                                   | University of Idaho                                  | United States of America (the)                             |
| Hudson, Spencer        |                                                                       | Utah State University                                | United States of America (the)                             |
| Hudson, John           | Restoration Biologist                                                 | Southeast Alaska Watershed Coalition                 | United States of America (the)                             |
| Hudson, Jonathan       | Ecologist                                                             | Natural resources wales                              | United Kingdom of Great Britain and Northern Ireland (the) |
| Huebener, PD Dr. Heike | Senior Researcher in Meteorology, Lecturer in Climate Geography       | Univerity Gießen                                     | Germany                                                    |
| Huebler, Michael       | Lecturer in Economics                                                 | University Gießen/Hannover                           | Germany                                                    |
| Huebsch, Frank         | Professional Civil Engineer (California)                              |                                                      | United States of America (the)                             |
| Huelamo, Nuria         | Research Scientist/Astrophysics                                       | CAB (CSIC-INTA)                                      | Spain                                                      |
| Huet, Valérie          | Biology                                                               | La Rochelle university-LIENSs                        | France                                                     |
| Hufford, Mary          | Faculty, Social Research Methods                                      | Future Generations University                        | United States of America (the)                             |
| Hugé, Jean             | Professor & Postdoctoral Researcher, Biology & Sustainability Science | Université Libre de Bruxelles & Universiteit Hasselt | Belgium                                                    |
| Hughes, Colin          | FRACGP MBBS FORMER HEAD PUBLIC HEALTH                                 | CURTIN UNIVERSITY                                    | Australia                                                  |
| Hughes, Lesley         | Professor                                                             | Macquarie University                                 | Australia                                                  |
| Hughes, Annie          | Staff Astronomer                                                      | Observatoire de Midi-Pyrenees                        | France                                                     |
| Hughes, Mark           | Professor, Wood Science                                               | Aalto University                                     | Finland                                                    |
| HUGHES, ROBERT         | REGIONAL AQUATIC ECOLOGIST                                            | AMNIS OPES INSTITUTE & OREGON STATE UNIVERSITY       | United States of America (the)                             |
| Hughey, Lacey          | Ecology                                                               | University of California, Santa Barbara              | United States of America (the)                             |
| Hugle, Thomas          | PhD candidate in physics                                              | Max-Planck-Institut für Kernphysik                   | Germany                                                    |

|                      |                                                                                  |                                                |                                                            |
|----------------------|----------------------------------------------------------------------------------|------------------------------------------------|------------------------------------------------------------|
| Huguet, S            | PhD Student                                                                      | University of Bristol                          | United Kingdom of Great Britain and Northern Ireland (the) |
| Huising, Elzo Jeroen | Soil Scientist                                                                   | International Insitute of Tropical Agriculture | Nigeria                                                    |
| Huisman, Robert      | Instrument scientist                                                             | SRON                                           | Netherlands (the)                                          |
| Huizenga, Juliana    | Environmental Engineering                                                        |                                                | United States of America (the)                             |
| Hülber, Karl         | Researcher                                                                       | University of Vienna                           | Austria                                                    |
| Hulbert, Joseph      | PhD Candidate                                                                    | University of Pretoria                         | South Africa                                               |
| Hulett, Eduardo      | professor                                                                        | Universidad Nacional de Cordoba                | Argentina                                                  |
| Hull, Heath          | MSc Zoology and Entomology, Life Science and Academic Head                       | Yeshiva College of South Africa                | South Africa                                               |
| Hull, Kelvin         | PhD Candidate                                                                    | Stellenbosch University                        | South Africa                                               |
| Hulot, Florence      | Researcher - Associate professor in ecology                                      | Paris-Sud University                           | France                                                     |
| Hulshof, Catherine   | Assistant Professor                                                              | Virginia Commonwealth University               | United States of America (the)                             |
| Hulsman, Kees        | Ecologist                                                                        | Griffith University                            | Australia                                                  |
| Hultman, Jenni       | Academy research fellow                                                          | University of Helsinki                         | Finland                                                    |
| Humann, Fernanda     | Professor                                                                        | Instituto Federal Catarinense                  | Brazil                                                     |
| Hummer, Philipp      | Citizen Science                                                                  | SPOTTERON                                      | Austria                                                    |
| Humphreys, James     | Emeritus Professor of Mathenatics & Statistics                                   | U. Massachusetts Amherst                       | United States of America (the)                             |
| Humphreys, William   | Adjunct Professor                                                                | University of Western Australia                | Australia                                                  |
| Humphries, Hope      | Research Associate                                                               | University of Colorado at Boulder              | United States of America (the)                             |
| Hung, Chih-Ming      | Assistant Research Fellow                                                        | Biodiversity Research Center, Academia Sinica  | Taiwan                                                     |
| Hunt, Carter         | Associate Professor / Recreation, Park, and Tourism Management, and Anthropology | Penn State University                          | United States of America (the)                             |
| Hunt, Gaelia         | Veterinary Science                                                               | South Metro TAFE Perth Western Australia       | Australia                                                  |
| Hunter, Jill         | Research Scientist (Cancer Research)                                             | Newcastle University                           | United Kingdom of Great Britain and Northern Ireland (the) |
| Hunter, Art          | Hypersonic Aerodynamics                                                          | Imperial College, University of London         | United Kingdom of Great Britain and Northern Ireland (the) |
| Hunter, Malcolm      | Professor of Wildlife Ecology                                                    | University of Maine                            | United States of America (the)                             |
| Hunter, David        | Ecologist-Retired                                                                |                                                | Australia                                                  |
| Huntley, Brian       | Emeritus Professor of Biosciences                                                | Durham University                              | United Kingdom of Great Britain and Northern Ireland (the) |
| Hunziker, Lukas      | Forest Pathology                                                                 |                                                | Switzerland                                                |
| Hunziker, Yannick    | Master Student / Aquatic Ecology                                                 | Eawag, Kastanienbaum                           | Switzerland                                                |
| huon, Alice          | agronome                                                                         |                                                | France                                                     |
| Hupé, Jean-Michel    | Researcher in Neurosciences and Political Ecology                                | CNRS                                           | France                                                     |
| Huppes, Gjalt        | Senior Researcher                                                                | CML, Leiden University                         | Netherlands (the)                                          |
| Huraux, Thomas       | Researcher in Computer Science                                                   | Scalian Lab                                    | France                                                     |
| Hurford, Anthony     | Water Resources Management                                                       | University of Manchester                       | United Kingdom of Great Britain and Northern Ireland (the) |
| Hurka, Sabine        |                                                                                  | Justus-Liebig-University Giessen               | Germany                                                    |

|                       |                                                            |                                                                     |                                                               |
|-----------------------|------------------------------------------------------------|---------------------------------------------------------------------|---------------------------------------------------------------|
| Hurni, Kaspar         | PhD in Geography                                           | Centre for Development and Environment (CDE),<br>University of Bern | Switzerland                                                   |
| Hurtado, Adriana      |                                                            | Universidad de los Andes                                            | Colombia                                                      |
| Hurth, Victoria       | Senior Associate                                           | University of Cambridge Institute for Sustainability<br>Leadership  | United Kingdom of Great Britain<br>and Northern Ireland (the) |
| husband, vicky        | environmental activist                                     |                                                                     | Canada                                                        |
| Huss, Matthias        | Glaciologist                                               | ETH Zürich                                                          | Switzerland                                                   |
| Hussain, Muzafar      | Assistant Professor, Faculty of Natural Sciences           | Shah Abdul Latif University, Khairpur                               | Pakistan                                                      |
| Hussain, Syed Ainul   | Scientist G                                                | Wildlife Institute of India                                         | India                                                         |
| Hussey, Steven        | Senior Lecturer: Genetics                                  | University of Pretoria                                              | South Africa                                                  |
| Husso, Aleks          | PhD student                                                | University of Helsinki                                              | Finland                                                       |
| husson, laurent       | researcher, geology                                        | CNRS                                                                | France                                                        |
| Huston, Daniel        | Postdoctoral fellow                                        | University of Tasmania                                              | Australia                                                     |
| Hutárová, Daniela     | Research scientist                                         | Institute of Landscape Ecology SAS, Bratislava                      | Slovakia                                                      |
| Hutchins, Patricia    | Energy Analyst and Operations Research Analyst             | Energy Information Administration                                   | United States of America (the)                                |
| Hutchinson, Helen     | Retired social scientist (sociology of health and illness) |                                                                     | Australia                                                     |
| Hutchinson, John      | Professor of Biology                                       | Royal Veterinary College                                            | United Kingdom of Great Britain<br>and Northern Ireland (the) |
| Huttenhofer, Mario    | Chemist                                                    | University of Applied Science Albstadt-Sigmaringen                  | Germany                                                       |
| HUTTO, RICHARD        | Emeritus Professor of Biology and Wildlife Biology         | University of Montana                                               | United States of America (the)                                |
| Huynh, Howard         | Postdoctoral Research Fellow                               | University of New Brunswick                                         | Canada                                                        |
| Hwang, Sung-Jin       | Professor                                                  | Woosuk University                                                   | Korea (the Republic of)                                       |
| Hwang, Bernice        | Ecosystem Science                                          | Lund University                                                     | Sweden                                                        |
| Hyman, Amanda         | Ecology and Evolutionary Biology                           | University of Tennessee                                             | United States of America (the)                                |
| Hytönen, Timo         | Professor, plant sciences                                  | University of Helsinki                                              | Finland                                                       |
| Hyvonen, Katriina     | Researcher/psychology                                      | University of Jyväskylä                                             | Finland                                                       |
| Iacolina, Laura       | Conservation Biology                                       | University of Zagreb                                                | Croatia                                                       |
| IACONO, FABRIZIO      | PhD student                                                | University of Liège                                                 | Belgium                                                       |
| Iannella, Mattia      | Research fellow                                            | University of L'Aquila                                              | Italy                                                         |
| Iannuzzi, Sara        | Pharmacology & Bioinformatics                              |                                                                     | Italy                                                         |
| Ibanez, Thomas        | Postdoctoral researcher in forest ecology                  | University of Hawaii at Hilo                                        | United States of America (the)                                |
| Ibáñez, Manuel        | Professor/Solar energy                                     | Universitat de Lleida                                               | Spain                                                         |
| Ibarbalz, Federico M. | Postdoc - Biology                                          | Institut de biologie de l' Ecole normale supérieure<br>(IBENS)      | France                                                        |
| Ibarguchi, Gabriela   | Conservation Scientist                                     | Living Corridor                                                     | Canada                                                        |
| Ibarra, Daniel        | Postdoctoral Fellow                                        | UC Berkeley                                                         | United States of America (the)                                |
| Ibarra, Federico      | PhD student in geology                                     | CONICET                                                             | Argentina                                                     |
| Ibarra, Jorge         | Professor                                                  | Cinvestav-Irapuato                                                  | Mexico                                                        |
| Ibrahim, Aya          | PhD student                                                | Fondazione Edmund Mach                                              | Italy                                                         |
| ice, charles          | hydrologist                                                | state of hawaii                                                     | United States of America (the)                                |
| Idzerda, Rejean       | Pharmacology and Medicine, retired                         | University of Washington                                            | United States of America (the)                                |

|                         |                                                                                           |                                                                     |                                                            |
|-------------------------|-------------------------------------------------------------------------------------------|---------------------------------------------------------------------|------------------------------------------------------------|
| IGWE, ORISA             | Professor                                                                                 | University of Missouri at Kansas City                               | United States of America (the)                             |
| Ihle, Malika            | post doctoral researcher                                                                  |                                                                     | France                                                     |
| Ilany, Amiyaal          |                                                                                           | Bar-Ilan University                                                 | Israel                                                     |
| Ile, Omoyemeh           | Teaching Assistant/M.sc Forestry                                                          | North Carolina State University                                     | United States of America (the)                             |
| Iler, Raeann            | Lab Assistant                                                                             | SCCWRP                                                              | United States of America (the)                             |
| Iler, Amy               | Conservation Scientist, Ecology                                                           | Chicago Botanic Garden                                              | United States of America (the)                             |
| Iles, Alastair          | Professor, Environmental Policy                                                           | UC Berkeley                                                         | United States of America (the)                             |
| Ilievska, Maja          | PhD student in Plant Biology                                                              | University of Helsinki                                              | Finland                                                    |
| Ilka Alina, Fischer     | B. Sc. Biology                                                                            | University of Bremen                                                | Germany                                                    |
| Illan, Javier           | Research Associate                                                                        | Washington State University                                         | United States of America (the)                             |
| Illera, Juan Carlos     | Lecture un Ecology                                                                        | University of Oviedo                                                | Spain                                                      |
| Illian, Janine          | Professor Statistical Sciences                                                            | University of Glasgow                                               | United Kingdom of Great Britain and Northern Ireland (the) |
| Iltis, Corentin         | PhD Student                                                                               | Université de Bourgogne Franche-Comté                               | France                                                     |
| Ilyad Ahmad, Aria       | Global Health Foresighting Fellow                                                         | Dahdaleh Institute for Global Health, York University               | Canada                                                     |
| Imaz, Mireya            | Ecology                                                                                   | UNAM, México                                                        | Mexico                                                     |
| Imbert Auvray, Nathalie | Assistant Professor                                                                       | La Rochelle University, LIENSs Laboratory, UMR                      | France                                                     |
| Imbulana, Upali         | Civil Engineer/Irrigation Specialist                                                      | UNDP (Consultant)                                                   | Sri Lanka                                                  |
| Imfeld, Gwenaél         | Research scientist                                                                        | National Centre for Scientific Research (CNRS)                      | France                                                     |
| Imlay, Marc             | Conservation biologist                                                                    | Mid-Atlantic Invasive Plant Council                                 | United States of America (the)                             |
| Immerzeel, Walter       | Professor mountain hydrology                                                              | Utrecht University                                                  | Netherlands (the)                                          |
| Immonen, Elina          | Assistant Professor                                                                       | Uppsala University                                                  | Sweden                                                     |
| Impellizzeri, Violette  | astronomer                                                                                | Atacama Large Millimeter/submillimeter Array                        | Chile                                                      |
| Imperio, Simona         | Researcher                                                                                | ISPRA - Italian Institute for Environmental Protection and Research | Italy                                                      |
| Inacio, Luanna          | Biomedical Scientist                                                                      | UNIFESP                                                             | Brazil                                                     |
| Inclan, Maria           | Profesora-Investigadora                                                                   | Centro de Investigacion y Docencia Economicas                       | Mexico                                                     |
| Indelicato, Claire      | PhD student                                                                               | ENS Lyon                                                            | France                                                     |
| Ingalsbee, Timothy      | Executive Director/ Environmental Sociologist                                             | Firefighters United for Safety, Ethics, and Ecology (FUSEE)         | United States of America (the)                             |
| Ingeman, Kurt           | Postdoctoral Researcher, David H. Smith Conservation Research Fellow, Marine Conservation | UC Santa Barbara                                                    | United States of America (the)                             |
| Ingle, Spencer          | Assistant Professor of Biology                                                            | Brigham Young University-Hawaii                                     | United States of America (the)                             |
| Ingólfsson, Ólafur      | Professor of geology                                                                      | University of Iceland                                               | Iceland                                                    |
| Inka, Willms            | PhD in microbiology                                                                       | Georg-August-University Göttingen                                   | Germany                                                    |
| Inogwabini, Bila-Isia   | Researcher                                                                                |                                                                     | Congo (the Democratic Republic of the)                     |
| Inouye, David           | Professor Emeritus / ecology                                                              | University of Maryland                                              | United States of America (the)                             |
| Inumaru, Mizue          | DVM, PhD student                                                                          | Nihon University                                                    | Japan                                                      |
| Iosif, Ruben            | Associate Researcher                                                                      | Unicersity Ovidius of Constanta                                     | Romania                                                    |
| Iosifidis, Christos     | Remote Sensing Instructor and Researcher                                                  | National Technical University of Athens                             | Greece                                                     |
| Iporac, Lowell Andrew   | Ph.D Candidate                                                                            | Florida International Univeristy                                    | United States of America (the)                             |

|                          |                                                                        |                                                                            |                                                            |
|--------------------------|------------------------------------------------------------------------|----------------------------------------------------------------------------|------------------------------------------------------------|
| Iracane, Elise           | PhD student, microbiology                                              | University college Dublin                                                  | Ireland                                                    |
| Iraeta Orbegoza, Miren   |                                                                        | GLOBE Institute                                                            | Denmark                                                    |
| Irazuzta, Sebastian      | Biologist                                                              | McMaster University                                                        | Canada                                                     |
| Iriondo, Jose            | Full Professor Ecology                                                 | Universidad Rey Juan Carlos                                                | Spain                                                      |
| Iriondo-DeHond, Amaia    | PhD Student in Food Science                                            | Instituto de Investigación en Ciencias de la Alimentación (CIAL, UAM-CSIC) | Spain                                                      |
| Irisarri, Iker           | Postdoctoral researcher                                                | Museo Nacional de Ciencias Naturales (MNCN-CSIC)                           | Spain                                                      |
| Irish, Vivian            | Professor                                                              | Yale Univ                                                                  | United States of America (the)                             |
| Irl, Severin             | Professor of Biogeography and Biodiversity                             | Institute of Physical Geography, Goethe-University Frankfurt               | Germany                                                    |
| Irmin, Dr. Fruth         | Geology                                                                | retired from Bayr. Geologische Staatssammlung                              | Germany                                                    |
| Irume, Mariana           | Post-Doctoral                                                          | NATIONAL INSTITUTE OF AMAZONIAN RESEARCH - INPA                            | Brazil                                                     |
| Irving, Damien           | Climate scientist                                                      | University of New South Wales                                              | Australia                                                  |
| Isaia, Marco             | Associate professor                                                    | University of Torino                                                       | Italy                                                      |
| Isaksen, Katja Elisabeth | PhD student, Animal Science                                            | Massey University                                                          | New Zealand                                                |
| Isaza, Carolina          | Assistant professor                                                    | Universidad Militar Nueva Granada                                          | Colombia                                                   |
| Isbell, Forest           | Assistant Professor of Ecology                                         | University of Minnesota Twin Cities                                        | United States of America (the)                             |
| Iskrzynski, Mateusz      | postdoctoral researcher, complex systems analysis                      | International Institute for Applied Systems Analysis                       | Austria                                                    |
| Isla, Enrique            | Researcher                                                             | Institut de Ciències del Mar-CSIC                                          | Spain                                                      |
| Islam, Shikder Saiful    | PhD student                                                            | University of Tasmania                                                     | Bangladesh                                                 |
| Islas-Flores, Tania      | Sciences PhD                                                           | UNAM                                                                       | Mexico                                                     |
| ISSBERNER, LIZ REJANE    | senior researcher                                                      | BRAZILIAN INSTITUTE OF SCIENCE AND TECHNOLOGY INFORMATION                  | Brazil                                                     |
| Isselin, Francis         | Associate Professor Ecology                                            | CNRS                                                                       | France                                                     |
| Itescu, Yuval            | Postdoc                                                                | Freie Universität Berlin                                                   | Germany                                                    |
| Iturriza-Gomara, Miren   | Professor of Virology                                                  | University of Liverpool                                                    | United Kingdom of Great Britain and Northern Ireland (the) |
| Ivan, Taavi              | PhD in Chemistry, Product Development and Technology Specialist        | Solis BioDyne                                                              | Estonia                                                    |
| Ivanauskas, Natalia      | Researcher                                                             | Instituto Florestal de São Paulo                                           | Brazil                                                     |
| Ivančić, Ingrid          | senior researcher/chemical oceanography                                | Institute Ruđer Bošković/Centre for Marine Research                        | Croatia                                                    |
| Ivanov, Vladislav        | PhD in geosciences                                                     | Politecnico di Milano                                                      | Italy                                                      |
| Ivanova, Silviya         | PhD student                                                            | University of Windsor                                                      | Canada                                                     |
| Iverson, Louis           | Research ecologist                                                     | USDA Forest Service                                                        | United States of America (the)                             |
| Iverson, Autumn          | Ecology                                                                | University of California, Davis                                            | United States of America (the)                             |
| Ivins, Erik              | American Geophysical Union Fellow / Cryosphere and Solid Earth Science | Jet. Propulsion Lab., California Institute of Technology                   | United States of America (the)                             |
| Ivkovic, Marija          | Assistant Professor/ Zoology, Ecology                                  | University of Zagreb, Faculty of Science, Department of Biology            | Croatia                                                    |
| Ivkovich, Milos          | Data Analyst/Scientist                                                 | Tree Breeding Australia/CSIRO                                              | Australia                                                  |

|                            |                                                                        |                                                              |                                                            |
|----------------------------|------------------------------------------------------------------------|--------------------------------------------------------------|------------------------------------------------------------|
| Izac, Anne-Marie           | Chair of the CGIAR research program on Forests, Trees and Agroforestry | CIFOR                                                        | United Kingdom of Great Britain and Northern Ireland (the) |
| Izadi, Sahar               | Marine Science                                                         |                                                              | New Zealand                                                |
| Izzo, Thiago               | Associate professor                                                    | Departamento de Ecologia e Botânica-UFMT                     | Brazil                                                     |
| Jaacks, Lindsay            | Assistant Professor of Global Health                                   | Harvard University                                           | United States of America (the)                             |
| Jablonowski, Nicolai David | Senior Research Scientist                                              | Forschungszentrum Jülich GmbH, IBG-2: Plant Sciences         | Germany                                                    |
| Jabłońska, Ewa             | Assistant professor, Vegetation ecology                                | Faculty of Biology, University of Warsaw                     | Poland                                                     |
| Jabot, Richard             | Postgraduate researcher                                                | Audencia                                                     | France                                                     |
| Jacic, Ljubomir            | Professor Control systems and Automation                               | Technical College Pozarevac                                  | Serbia                                                     |
| Jackisch, Conrad           | Hydro-Geoecologist                                                     | Technical University Braunschweig                            | Germany                                                    |
| Jackson, Peter             | Atmospheric Scientist                                                  | University of Northern British Columbia                      | Canada                                                     |
| Jackson, Lynn              | Marine Scientist                                                       | Coastal & Environmental Consulting                           | South Africa                                               |
| Jackson, Mark              | Postdoctoral research fellow                                           | The University of Queensland                                 | Australia                                                  |
| Jackson, Stephen           | Postdoctoral Research Fellow; Microbiology                             | University College Cork                                      | Ireland                                                    |
| Jackson, Miriam            | Research scientist (glaciology)                                        | Norwegian water resources and energy directorate             | Norway                                                     |
| Jacobi, Pedro Roberto      | Senior Full Professor                                                  | University of São Paulo- Institute of Energy and Environment | Brazil                                                     |
| Jacobi, Johanna            | PhD, Geography                                                         | Centre for Development and Environment, University of Bern   | Switzerland                                                |
| Jacoboski, Lucilene        | Post doc/Ecology                                                       | Universidade Federal do Rio Grande do Sul                    | Brazil                                                     |
| Jacobs, David              | Professor (Biology:Evolutionary Biology)                               | University of Cape Town                                      | South Africa                                               |
| Jacobs, Valentine          | PhD candidate                                                          | Université Libre de Bruxelles                                | Belgium                                                    |
| Jacobs, Nicole             | Graduate Student Researcher                                            | University of Alaska Fairbanks                               | United States of America (the)                             |
| jacobson, zachary          | senior mathematician                                                   | health canada                                                | Canada                                                     |
| Jacoby, David              | Research Fellow/Marine Biology                                         | Institute of Zoology, Zoological Society of London           | United Kingdom of Great Britain and Northern Ireland (the) |
| Jacq, Maxime               | Biology                                                                | Université de Montréal                                       | Canada                                                     |
| Jacquemart, Mylène         | Graduate Student Researcher                                            | University of Colorado Boulder                               | United States of America (the)                             |
| Jacquemin, Bertrand        | Researcher / Marine Ecology, Population Genetics and Aquaculture       | Algae Technology and Innovation Centre (CEVA)                | France                                                     |
| Jacquemyn, Hans            | Professor                                                              | KU Leuven                                                    | Belgium                                                    |
| Jacqueot, Loic             | Phd student                                                            | Université Laval                                             | Canada                                                     |
| jacquin, philippe          | Ingénieur d'études                                                     | INRA                                                         | France                                                     |
| Jacquin, Lisa              | Assistant Professor in Ecology                                         | Université Toulouse 3 Paul Sabatier                          | France                                                     |
| Jacquot, Maude             | Postdoc                                                                | INRA                                                         | France                                                     |
| Jactel, Herve              | Senior scientist in forest ecology and biodiversity                    | French National Institute of Agricultural Research (INRA)    | France                                                     |
| Jadot, Catherine           | Marine Biologist                                                       | ES Caribbean                                                 | United States of America (the)                             |
| Jadoul, Julie              | Laboratory technician                                                  | UCL                                                          | Belgium                                                    |
| Jady, Beata                | chargé de recherche                                                    | CNRS                                                         | France                                                     |

|                              |                                                                         |                                                                        |                                |
|------------------------------|-------------------------------------------------------------------------|------------------------------------------------------------------------|--------------------------------|
| Jaén-Molina, Ruth            | Researcher at Molecular Biodiversity Department and Canarian DNA Bank   | Botanic Garden "Viera y Clavijo" (Cabildo de Gran Canaria)             | Spain                          |
| Jaenisch, Thomas             | Associate Professor                                                     | Colorado School of Public Health, Center for Global Health             | United States of America (the) |
| Jager, Wander                | Managing director of the Groningen Center for Social Complexity Studies | University of Groningen                                                | Netherlands (the)              |
| Jäger, Lucas                 | Biology                                                                 |                                                                        | Germany                        |
| Jagoe, Charles               | Professor of Environmental Science                                      | Florida A&M University                                                 | United States of America (the) |
| Jagusztyn-Krynicka, Elżbieta | professor                                                               | University of Warsaw                                                   | Poland                         |
| Jaillard, Etienne            | Senior scientist                                                        | Institut de Recherche pour le Développement (IRD)                      | France                         |
| Jain, Nandini                | General Practitioner                                                    |                                                                        | Germany                        |
| Jairam-Doerga, Sabitrie      | researcher                                                              | Anton de Kom University of Suriname                                    | Suriname                       |
| Jakobsson, Elizabeth         | Limnology                                                               | University of Uppsala                                                  | Sweden                         |
| Jamali, Sara                 |                                                                         | CNRS                                                                   | France                         |
| Jamelli, Davi                | PhD student                                                             | Universidade Federal de Pernambuco (UFPE) - Recife, PE, Brazil         | Brazil                         |
| James, Rebecca               | PhD Candidate                                                           | Royal Netherlands Institute for Sea Research   University of Groningen | Netherlands (the)              |
| James, Alex                  | Mathematical modeller                                                   | University of Canterbury                                               | New Zealand                    |
| JAMET, Jean-Louis            | Professor                                                               | Université de Toulon - Laboratoire MIO UM 110                          | France                         |
| Jandt, Jennifer              | Senior Lecturer                                                         | University of Otago                                                    | New Zealand                    |
| JANEAU, Jean Louis           | Hydro-ecology                                                           | IRD                                                                    | France                         |
| Janes, Michael               | Cell Biologist                                                          |                                                                        | United States of America (the) |
| Janes, Morgan                | Marine biology                                                          | Oregon Institute of Marine Biology, University of Oregon               | United States of America (the) |
| Jänicke, Martin              | Prof. Political Science                                                 | IASS, Free University of Berlin                                        | Germany                        |
| Janisch, Judith              | PhD behavioral biology                                                  |                                                                        | Austria                        |
| Jankovic, Jasna              | Assistant Professor                                                     | University of Connecticut                                              | United States of America (the) |
| Jankowsky, Mayra             | PhD                                                                     |                                                                        | Brazil                         |
| Janse van Rensburg, Lomarie  | Honours student Entomology                                              | University of Pretoria                                                 | South Africa                   |
| Jansen, Patrick              | Associate professor of ecology                                          | Wageningen University                                                  | Netherlands (the)              |
| Jansen, Steven               | Prof. Dr., Plant Scientist                                              | Ulm University                                                         | Germany                        |
| Jansen, Boris                | Associate Professor of Soil Chemistry                                   | University of Amsterdam                                                | Netherlands (the)              |
| Jansen, henk                 | Landscape-ecologist                                                     | Buro Elodea                                                            | Netherlands (the)              |
| Jansen, Stefan               | Global Mental Health                                                    | University of Rwanda                                                   | Rwanda                         |
| Jansen, Hannah               | Project Coordinator, sustainability economics/coastal governance        | Leibniz Center for Tropical Marine Research (ZMT)                      | Germany                        |
| Jansen-van Vuuren, Ross      | Postdoctoral Research Fellow                                            | Queen's University                                                     | Canada                         |
| Jansman, Hugh                | Wildlife ecologist                                                      | Wageningen environmental research                                      | Netherlands (the)              |
| Janson, Charles              | Professor, Biology                                                      | The University of Montana                                              | United States of America (the) |
| Janssen, Arne                | Associate professor                                                     | University of Amsterdam                                                | Netherlands (the)              |
| Janssen, Luis                | PhD student Molecular Biology                                           | University of Brasília                                                 | Brazil                         |

|                          |                                                                  |                                                                   |                                                            |
|--------------------------|------------------------------------------------------------------|-------------------------------------------------------------------|------------------------------------------------------------|
| Janssen, Philippe        | Post-Doc Ecology                                                 | IRSTEA                                                            | France                                                     |
| Janssens, Ivan           | Biologe professor                                                | Antwerp University                                                | Belgium                                                    |
| Janssens, Julie          | Hydrochemist, sea ice biogeochemist                              |                                                                   | Australia                                                  |
| Janssens, Lizanne        | postdoctoral researcher                                          | KU Leuven                                                         | Belgium                                                    |
| Jansson, Johan           | Associate Professor Sustainability Marketing                     | Lund University                                                   | Sweden                                                     |
| Jantke, Kerstin          | Postdoctoral Researcher in Conservation Biology                  | University of Hamburg                                             | Germany                                                    |
| Januchta-Szostak, Anna   | Assoc. Prof. D.Sc. Ph.D. Arch. / Architecture and urban planning | Department of Architecture at the Poznan University of Technology | Poland                                                     |
| Janus, Thorsten          | Associate Professor of Economics                                 | University of Wyoming                                             | United States of America (the)                             |
| Janus, Michal            | Psychology                                                       | PZU                                                               | Poland                                                     |
| Janzen, Thijs            | Postdoc                                                          | University of Groningen                                           | Netherlands (the)                                          |
| Janzen, Fredric          | Professor of Ecology, Evolution, & Organismal Biology            | Iowa State University                                             | United States of America (the)                             |
| Janzen, Daniel           | Professor of Conservation Biology                                | University of Pennsylvania                                        | United States of America (the)                             |
| Jarau, Stefan            | Professor                                                        | University College for Teacher Education Vorarlberg               | Austria                                                    |
| Jarauta-Arabi, Alexandre | Postdoctoral fellow, Mechanical Engineering                      | University of Alberta                                             | Canada                                                     |
| Jarčuška, Benjamín       | senior researcher/ecology                                        | Slovak Academy of Sciences - Institute of Forest Ecology          | Slovakia                                                   |
| Jardillier, Ludwig       | Professor in Ecology                                             | Université Paris-Sud                                              | France                                                     |
| Jarfors, AndersE. W.     | Professor / materials and Manufacturing                          | Jönköping University                                              | Sweden                                                     |
| Jaroszewicz, Bogdan      | Associate Professor / Biology                                    | Faculty of Biology, University of Warsaw                          | Poland                                                     |
| Jarraya, Marion          | Associate professor Population Biology                           | university of Perpignan                                           | France                                                     |
| Järvensivu, Paavo        | Researcher, D.Sc. (Econ.)                                        | BIOS Research Unit                                                | Finland                                                    |
| Jarvis, Jessie           | Assistant Professor                                              | University of North Carolina Wilmington                           | United States of America (the)                             |
| Jarvis, Rachel           | Wildlife conservation, primatologist                             |                                                                   | United Kingdom of Great Britain and Northern Ireland (the) |
| Jarvis, Karl             | Lecturer                                                         | Southern Utah University                                          | United States of America (the)                             |
| Jashimuddin, Mohammed    | Professor                                                        | University of Chittagong                                          | Bangladesh                                                 |
| Jasper, William          | Fisheries Biology - Field Biologist                              | International Pacific Halibut Commission                          | United States of America (the)                             |
| Jasperse, iapi           | Statistics Adviser and Scientific Publisher                      | Tokelau National Statistics Office                                | Tokelau                                                    |
| Jattiot, Romain          | Geology                                                          |                                                                   | France                                                     |
| Jaugeon, Baptiste        | Fishery scientist                                                | DSA Wallis et Futuna                                              | Wallis and Futuna                                          |
| Jauhiainen, Jyrki        | Researcher                                                       | Department of Forest Sciences/ University of Helsinki             | Finland                                                    |
| Jaunatre, Renaud         | Researcher in Restoration Ecology                                | Irstea                                                            | France                                                     |
| Javal, Marion            | PostDoctoral Researcher                                          | Stellenbosch University                                           | South Africa                                               |
| Javerzat, Sophie         | Professor of Genetics                                            | University of Bordeaux Inserm                                     | France                                                     |
| Javerzat, Jean-Paul      | Scientist / Molecular Biology                                    | CNRS                                                              | France                                                     |
| Javier, Grosfeld         | Biologist                                                        | CONICET                                                           | Argentina                                                  |
| Jaworski, Coline         | AXA Postdoctoral Fellow                                          | Aix-Marseille Université / University of Oxford                   | France                                                     |
| Jax, Elinor              | Postdoctoral researcher in biology                               | Max Planck Institute for Ornithology                              | Germany                                                    |
| Jay, Sylvain             | Post doctoral research fellow                                    | INRA                                                              | France                                                     |
| Jayaraman, Jay           | Post-doctoral Scientist                                          | Plant and Food Research                                           | New Zealand                                                |

|                            |                                                                          |                                                        |                                                            |
|----------------------------|--------------------------------------------------------------------------|--------------------------------------------------------|------------------------------------------------------------|
| Jayne, Kimberley           | Senior Science Researcher / Doctor of Animal Behaviour                   | Animal Defenders International                         | United Kingdom of Great Britain and Northern Ireland (the) |
| Jbenyeni, Adam             | PhD Student, DVM                                                         | ENVT                                                   | France                                                     |
| Jeal, Corey                | Conservation biology                                                     | NGO                                                    | Zambia                                                     |
| Jean, Kévin                | Lecturer in Epidemiology                                                 | Conservatoire national des Arts et Métiers             | France                                                     |
| JEAN, Frédéric             | assistant engineer in forest ecology                                     | INRA                                                   | France                                                     |
| JEAN, Frederic             | Pr Marine Ecology                                                        | Université de Brest / IUEM                             | France                                                     |
| Jean Philippe, Tonneau     | geograph                                                                 | CIRAD                                                  | France                                                     |
| Jean-Louis, Charli         | Research Professor                                                       | Universidad Nacional Autonoma de Mexico                | Mexico                                                     |
| Jeanene, Jeanene           | Community development                                                    |                                                        | South Africa                                               |
| Jeanneau, Laurent          | Organic Geochemistry                                                     | CNRS                                                   | France                                                     |
| Jeanniard du Dot, Tiphaine | Research Scientist, Marine Biology and Ecology                           | Centre National de la Recherche Scientifique France    | France                                                     |
| Jeantet, Lorène            | Phd Student                                                              | CNRS                                                   | France                                                     |
| Jeffreys, Rachel           | Marine biologist                                                         | University of liverpool                                | United Kingdom of Great Britain and Northern Ireland (the) |
| Jeffries, Daniel           | Postdoctoral researcher                                                  | University of Lausanne                                 | Switzerland                                                |
| Jégou, Laurent             | Maître de conférences en géographie                                      | Université de Toulouse-2 Jean Jaurès                   | France                                                     |
| Jégou, Anne                | Assistant Profesor - Geography                                           | University of Burgundy                                 | France                                                     |
| Jeleapov, Ana              | researcher, geography                                                    | Institute of Ecology and Geography                     | Moldova (the Republic of)                                  |
| Jemmett, Anna              | PhD student- Conservation biology                                        | University of Kent/Institute of Zoology-ZSL            | United Kingdom of Great Britain and Northern Ireland (the) |
| Jenicek, Michal            | Researcher, hydrology                                                    | Charles University, Prague                             | Czech Republic (the)                                       |
| Jenkins, Alastair          | Visiting scientist, Geophysical Institute                                | University of Bergen                                   | Norway                                                     |
| Jenkins, Holly             | PhD Research Student - marine biogeochemistry                            | University of Southampton                              | United Kingdom of Great Britain and Northern Ireland (the) |
| Jenkins, David             | Professor, Department of Nutritional Sciences and Department of Medicine | University of Toronto                                  | Canada                                                     |
| Jenkins, Stephen           | Professor of Biology Emeritus                                            | University of Nevada, Reno                             | United States of America (the)                             |
| Jenkinson, Ian             | Researcher in oceanography                                               | Agency for Consultation and Research in Oceanography   | France                                                     |
| Jenner, Emma               | Strategic Planning and Operations Manager                                | CABI                                                   | Switzerland                                                |
| Jennings, Michael          | Ecologist specializing in biotic responses to climate change             | University of Idaho; Retired, U.S. Forest Service      | United States of America (the)                             |
| Jennings, Patricia         | Professor of Education                                                   | University of Virginia                                 | United States of America (the)                             |
| Jennings, Richard          | Senior Lecturer in Archaeology                                           | Liverpool John Moores University                       | United Kingdom of Great Britain and Northern Ireland (the) |
| Jennings, W. Bryan         | Research Scientist/Ecology and Evolutionary Biology                      | Museu Nacional, Universidade Federal do Rio de Janeiro | Brazil                                                     |
| Jennions, Michael          | Professor in Biology                                                     | Australian National University                         | Australia                                                  |
| Jenny, Jean-Philippe       | Researcher                                                               | INRA - national institute for agricultural research    | France                                                     |
| Jensen, Marlene Mark       | Senior Researcher                                                        | Technical University of Denmark                        | Denmark                                                    |
| Jensen, Frants             | Marine Biologist                                                         | Woods Hole Oceanographic Institution                   | United States of America (the)                             |

|                                   |                                                               |                                                                                                              |                                                            |
|-----------------------------------|---------------------------------------------------------------|--------------------------------------------------------------------------------------------------------------|------------------------------------------------------------|
| Jentsch, Anke                     | Professor of Disturbanc Ecology                               | University of Bayreuth                                                                                       | Germany                                                    |
| Jephcott, Freya                   | Research fellow in emerging infectious diseases               | University of Cambridge                                                                                      | United Kingdom of Great Britain and Northern Ireland (the) |
| Jeppesen, Erik                    | Professor;DSc                                                 | Aarhus University                                                                                            | Denmark                                                    |
| Jepsen, Jane Uhd                  | Senior researcher, Ecology                                    | NINA                                                                                                         | Norway                                                     |
| Jepsen, Emma                      | MSc Zoology Candidate                                         | University of Pretoria                                                                                       | South Africa                                               |
| Jeran, Matevž                     | Master of nutrition (MSc.)                                    |                                                                                                              | Slovenia                                                   |
| Jeschke, Alina                    | PhD student Evolutionary Genetics                             | Max Planck Institute for Evolutionary Biology                                                                | Germany                                                    |
| Jesse, Wendy                      | PhD Candidate Animal Ecology                                  | Vrije Universiteit Amsterdam                                                                                 | Netherlands (the)                                          |
| Jessen, Lasse                     | Phd student                                                   | University of Copenhagen                                                                                     | Denmark                                                    |
| Jessen, Maria-Theresa             | PhD student in Ecology                                        | Helmholtz Centre for Environmental Research (UFZ)/German Centre for Integrative Biodiversity Research (iDiv) | Germany                                                    |
| Jessie, William                   |                                                               | Oregon State University                                                                                      | United States of America (the)                             |
| Jesson, Julie                     | Post-doctoral Research Fellow, Epidemiology and Public Health | Inserm U1027, Université Toulouse III Paul Sabatier                                                          | France                                                     |
| Jessus, Catherine                 | Senior Researcher / Biology                                   | CNRS                                                                                                         | France                                                     |
| Jesus, Fátima                     | Investigator/Biology                                          | CESAM and Dept of Environment and Planning of University of Aveiro                                           | Portugal                                                   |
| Jesus Fontes, Sónia Alexandra     | Biomedical Sciences researcher                                | Leibniz Institute for Zoo and Wildlife research, Berlin, Germany                                             | Portugal                                                   |
| Jeuken, Alan                      | PhD, Synthetic Chemist                                        | CRO                                                                                                          | United Kingdom of Great Britain and Northern Ireland (the) |
| Jewell, Zoe                       | Wildlife biologist                                            | WildTrack                                                                                                    | United States of America (the)                             |
| Jewitt, Debbie                    | Conservation scientist                                        |                                                                                                              | South Africa                                               |
| Jha, Rohit                        | Research Fellow, Ecology/Wildlife biology                     | Wildlife Institute of India                                                                                  | India                                                      |
| Jhangeer-Khan, Reshad             | Marine and Terrestrial Biodiversity Conservationist           | Mauritian Wildlife Foundation                                                                                | Mauritius                                                  |
| Jiang, Mingkai                    |                                                               | Western Sydney University                                                                                    | Australia                                                  |
| Jiang, Renji                      | MSc student                                                   | University of Canterbury                                                                                     | China                                                      |
| Jiang, Leiwen                     | Senior Associate and Professor                                | Population Council and Shanghai Univesity                                                                    | China                                                      |
| Jiguet, Frédéric                  | Professor in Conservation Biology                             | Muséum National d'Histoire Naturelle, UMR7204 CESCO                                                          | France                                                     |
| Jimenez, Jaime                    | Professor, Conservation Biology                               | University of North Texas                                                                                    | United States of America (the)                             |
| Jimenez, Maria Laura              | Comerciante                                                   |                                                                                                              | Dominican Republic (the)                                   |
| Jimenez, Jose                     | Investigador                                                  | Consejo Superior de Investigaciones Cientificas                                                              | Spain                                                      |
| Jimenez, Maria_Dolores            | Associate Professor, Ecology                                  | Universidad Complutense de Madrid                                                                            | Spain                                                      |
| Jimenez, Mercedes                 | scientist                                                     | CSIC                                                                                                         | Spain                                                      |
| Jiménez, Everardo                 | Master in Biology                                             | Universidad Autónoma Metropolitana Iztapalapa                                                                | Mexico                                                     |
| Jiménez, Laura                    | Postdoctoral                                                  | Univeristy of Granada. Department of Ecology                                                                 | Spain                                                      |
| Jiménez Cano, Nayeli G.           | Senior Technical Officer                                      | Universidad Autonoma de Yucataa                                                                              | Mexico                                                     |
| JIMENEZ GONZALEZ, ANTONIO ESTEBAN | RESEARCHER                                                    | UNAM                                                                                                         | Mexico                                                     |

|                                |                                                             |                                                                             |                                                            |
|--------------------------------|-------------------------------------------------------------|-----------------------------------------------------------------------------|------------------------------------------------------------|
| Jiménez Herrera, Miguel Ángel  | PhD student                                                 | Materials Physics Center                                                    | Spain                                                      |
| Jiménez Lalana, Diego Esteban  | PhD Student in Microbiology                                 | National Center of Biotechnologyb - Spanish National Research Council       | Spain                                                      |
| Jimenez Vilchez, Ricardo Jesus | Coordinador del Programa Ambiental/ Biologo                 | Terra Nuova                                                                 | Peru                                                       |
| Jiménez-Domínguez, Aris        | Biologist                                                   | Instituto de Ciencias Médicas                                               | Panama                                                     |
| Jimenez-Guri, Eva              | Postdoctoral Researcher, Evolutionary Developmental Biology | The University of Exeter                                                    | United Kingdom of Great Britain and Northern Ireland (the) |
| Jiménez-Hidalgo, Eduardo       | Full professor                                              |                                                                             | Mexico                                                     |
| Jiménez-Jacinto, Verónica      | Academic                                                    | UNAM                                                                        | Mexico                                                     |
| Jiménez-Melero, Raquel         | Lecturer in Ecology                                         | Universidad de Jaén                                                         | Spain                                                      |
| Jiménez-Morillo, Nicasio T     | Postdoctoral Researcher                                     | University of Evora                                                         | Portugal                                                   |
| JIMÉNEZ-MORILLO, NICASIO TOMÁS | Post-Doc Researcher in Biogeochemistry                      | LABORATORIO HERCULES (UNIVERSIDADE DE ÉVORA)                                | Portugal                                                   |
| Jiménez-Rodríguez, César       | Forest Hydrologist                                          | Delft University of Technology                                              | Costa Rica                                                 |
| Jiménez-Ruiz, Jesús            |                                                             | National Institute for Agricultural and Food Research and Technology (INIA) | Spain                                                      |
| Jin, Chenyu                    | Postdoctoral researcher                                     | Max Planck Institute for Dynamics and Self-Organization                     | Germany                                                    |
| Jiskoot, Hester                | Associate Professor of Physical Geography & Glaciology      | University of Lethbridge                                                    | Canada                                                     |
| Job, Dominique                 | Emeritus CNRS REsearch Director                             | CNRS                                                                        | France                                                     |
| Jobard, Gaël                   | associate professor in psychology                           | Université de Bordeaux                                                      | France                                                     |
| Jochum, Malte                  | PostDoc in Biodiversity and Ecology                         | iDiv & Leipzig University, Germany                                          | Germany                                                    |
| Joda, Aisha                    | Medical doctor                                              |                                                                             | United Kingdom of Great Britain and Northern Ireland (the) |
| Joe, Stephanie                 | Forest Pest Biologist                                       | University of Hawaii at Manoa                                               | United States of America (the)                             |
| Joel, Matthew                  | Graduate Student                                            | University of Calgary                                                       | Canada                                                     |
| Joetzjer, Emilie               | Postdoctoral Researcher                                     | CNRM/Météo-France                                                           | France                                                     |
| Joffe, Ricardo                 | PhD student                                                 | Université de Lorraine                                                      | France                                                     |
| Johansen, Tine Sköll           | Master of applied ecology                                   |                                                                             | Norway                                                     |
| Johansson, Robert              | PhD Candidate (Energy Systems)                              | University of Gävle                                                         | Sweden                                                     |
| Johns, David                   | Adjunct Professor Political Science                         | Portland State University                                                   | United States of America (the)                             |
| Johns, Mitchell                | Professor Emeritus Soil and Crop Science                    | California State Univeristy                                                 | United States of America (the)                             |
| Johns, Jennifer                | Faculty, veterinary pathology                               | Oregon State University                                                     | United States of America (the)                             |
| JOHNS, Dominic Tiatou          | Liberia REDD+ Convener                                      | Liberia REDD+ Technical Working Group                                       | Liberia                                                    |
| johnson, geoff                 | Veterinary Surgeon                                          | WHS                                                                         | United Kingdom of Great Britain and Northern Ireland (the) |
| Johnson, Robert                | Adjunct Faculty - Biology                                   | Arizona State University                                                    | United States of America (the)                             |
| Johnson, William               | PhD student - geosciences                                   | Newcastle University                                                        | United Kingdom of Great Britain and Northern Ireland (the) |
| Johnson, Rebecca               | Microbiologist                                              | Pharmaceutical Industry                                                     | Austria                                                    |
| Johnson, Richard               | Professor                                                   | Swedish University of Agricultural Sciences                                 | Sweden                                                     |

|                       |                                                        |                                                        |                                                            |
|-----------------------|--------------------------------------------------------|--------------------------------------------------------|------------------------------------------------------------|
| Johnson, Shelly       | Biology                                                | Pasadena City College                                  | United States of America (the)                             |
| Johnson, Kira         | Conservation Biologist                                 | Voices for Biodiversity                                | United States of America (the)                             |
| Johnson, H. Thomas    | Economic History                                       | Portland State University (emeritus)                   | United States of America (the)                             |
| Johnson, Mark         | Professor and Canada Research Chair                    | University of British Columbia                         | Canada                                                     |
| Johnson, Malcolm      | Watershed Manager                                      | The Bureau of Environmental and Coastal Quality (BECQ) | Northern Mariana Islands (the)                             |
| Johnson, Erik         | PhD student - Astrophysics                             | Georg-August Universität Göttingen                     | Germany                                                    |
| Johnson, Raymond      | Chemist/Director Institute of Climate Studies          | NFP                                                    | United States of America (the)                             |
| Johnson, Douglas H    | Statistician                                           | University of Minnesota                                | United States of America (the)                             |
| Johnson, Claire       | Life Sciences                                          | EMBL-EBI                                               | United Kingdom of Great Britain and Northern Ireland (the) |
| Johnson, Mark         | Prof. / Microbial Ecologist                            | University of St. Joseph                               | United States of America (the)                             |
| Johnston, Adam        | Professor of Physics                                   | Weber State University                                 | United States of America (the)                             |
| Johnston, Alice       | Research Fellow / Ecology                              | University of Reading                                  | United Kingdom of Great Britain and Northern Ireland (the) |
| Johnston, Theresa     | Environmental toxicology                               | Loyola University Chicago                              | United States of America (the)                             |
| Johnston, Scott       | Professor Earth Science                                | Southern Cross University                              | Australia                                                  |
| Johnston, Lynn        | Forest Fire Research Specialist                        | Natural Resources Canada, Canadian Forest Service      | Canada                                                     |
| Johnstone, Jill       | Adjunct Professor of Biology                           | University of Saskatchewan                             | Canada                                                     |
| Jola, Simone          | Research assistant                                     | WSL                                                    | Switzerland                                                |
| Joly, Etienne         | Research Scientist in biology                          | INSERM, France                                         | France                                                     |
| Joly, François-Xavier | Soil Ecologist                                         | University of Stirling                                 | United Kingdom of Great Britain and Northern Ireland (the) |
| Joly, Mona            | PhD in social science                                  | WZB                                                    | Germany                                                    |
| JOLY, Carlos Alfredo  | Professor of Ecology                                   | University of Campinas/UNICAMP                         | Brazil                                                     |
| Jonckheere, Inge      | Lead Author                                            | IPCC                                                   | Belgium                                                    |
| Jones, David          | Entomologist                                           | Natural History Museum, London                         | United Kingdom of Great Britain and Northern Ireland (the) |
| Jones, Loretta        | Emeritus Professor of Chemistry                        | University of Northern Colorado                        | United States of America (the)                             |
| Jones, Robert         | Glaciology                                             |                                                        | United Kingdom of Great Britain and Northern Ireland (the) |
| Jones, Morgan         | PhD student                                            | Francis Crick Institute                                | United Kingdom of Great Britain and Northern Ireland (the) |
| Jones, Holly          | Associate Professor                                    | Northern Illinois University                           | United States of America (the)                             |
| Jones, Cynthia        | Professor                                              | University of Connecticut                              | United States of America (the)                             |
| Jones, Roger          | Professorial Research Fellow, Climate risk             | Victoria University                                    | Australia                                                  |
| Jones, Samuel         | PhD researcher                                         | Royal Holloway, University of London                   | United Kingdom of Great Britain and Northern Ireland (the) |
| Jones, Sarah          | Associate Scientist, Farms, Fields and Landscapes Team | Bioversity International                               | France                                                     |
| Jones, Rhiannon       | Chemistry teacher                                      | Lakelands Academy                                      | United Kingdom of Great Britain and Northern Ireland (the) |

|                             |                                                     |                                                                   |                                                            |
|-----------------------------|-----------------------------------------------------|-------------------------------------------------------------------|------------------------------------------------------------|
| Jones, Mark                 | Veterinarian and wildlife conservationist           |                                                                   | United Kingdom of Great Britain and Northern Ireland (the) |
| Jones, Robert               | Professor                                           | Universidad Autónoma de Querétaro                                 | Mexico                                                     |
| Jones, Lizzie               | PhD Student Conservation Ecology                    | Institute of Zoology, London                                      | United Kingdom of Great Britain and Northern Ireland (the) |
| Jones, Andy                 | Associate Professor                                 | Oregon State University                                           | United States of America (the)                             |
| Jones, Harrison             | PhD Candidate                                       | University of Florida                                             | United States of America (the)                             |
| Jones, Alan                 | Senior Fellow, Ecologist                            | Australian Museum                                                 | Australia                                                  |
| Jones, Auriane              | Lecturer in marine biology and ecology              | Agrocampus Ouest                                                  | France                                                     |
| Jones, Christopher          | Marine Ornithology                                  | Independent Researcher                                            | South Africa                                               |
| Jones, Hannah               | Researcher                                          | University of Liverpool                                           | United Kingdom of Great Britain and Northern Ireland (the) |
| Jones, Gregory              | Director, Center for Wine Education                 | Linfield College                                                  | United States of America (the)                             |
| Jones, Melanie              | Professor of Biology                                | University of British Columbia Okanagan campus                    | Canada                                                     |
| Jones, Richard              | Emeritus Professor of Polymer Science               | University of Kent, Canterbury                                    | United Kingdom of Great Britain and Northern Ireland (the) |
| Jones, Graham               | Earth Systems Science (Adjunct Associate Professor) | Southern Cross University                                         | Australia                                                  |
| Jones, Stephanie            | Ornithologist                                       | US Fish and Wildlife Service                                      | United States of America (the)                             |
| jonker, marlotte            | phd student                                         | uni freiburg                                                      | Germany                                                    |
| Jonker, Anneke              | retired biologist                                   |                                                                   | Netherlands (the)                                          |
| Jónsdóttir, Ingibjörg Svala | Professor of Ecology                                | University of Iceland                                             | Iceland                                                    |
| Jordan, Neil                | Lecturer (Conservation Ecology)                     | University of New South Wales                                     | Australia                                                  |
| Jordan, Ferenc              | biologist                                           | MTA Centre for Ecological Research                                | Hungary                                                    |
| Jordan, Asia                | Research Assistant                                  | University College Dublin                                         | Ireland                                                    |
| Jordan, David               | Lecturer, Soil Physics                              | LJMU                                                              | United Kingdom of Great Britain and Northern Ireland (the) |
| Jordano, Diego              | Professor / Ecology                                 | Faculty of Sciences, University of Cordoba                        | Spain                                                      |
| Jordano, Pedro              | Research Professor Ecology                          | Consejo Superior de Investigaciones Científicas                   | Spain                                                      |
| Jorge, Rafael               | PhD Candidate in Ecology                            | National Institute of Amazon Researches                           | Brazil                                                     |
| JORGE, Rodrigo              | Coordinator                                         | Intituto Chico Mendes de Conservação da Biodiversidade - ICMBio   | Brazil                                                     |
| Jørgensbye, Helle           | PhD Marine Biology                                  |                                                                   | Denmark                                                    |
| Jorgensen, Bethany          | PhD Candidate, Natural Resources                    | Cornell University                                                | United States of America (the)                             |
| Jorgensen, Julia C.         | Experimental Cognitive Psychology                   | Retired                                                           | United States of America (the)                             |
| Jorna, Jesse                | PhD Candidate in Biology                            | Brigham Young University                                          | United States of America (the)                             |
| Joseph, Jacques             | Postdoc                                             | Faculty of Science, Charles University Prague                     | Czech Republic (the)                                       |
| Joseph, Matthieu            | PhD surfent in mathematics                          | ENS de Lyon                                                       | France                                                     |
| JOSEPH, Philippe            | Profesor                                            | UMR ESPACE DEV -University oh French West indies                  | Martinique                                                 |
| Josephs-Spaulding, Jonathan | Systems Biology                                     | Institute of Experimental Medicine                                | Germany                                                    |
| Joshi, Sharad P.            | Cryosphere Analyst                                  | International Centre for Integrated Mountain Development (ICIMOD) | Nepal                                                      |
| Joshi, Aditya               | Wildlife Biologist                                  |                                                                   | India                                                      |

|                         |                                                                                 |                                                                                                                                                |                                |
|-------------------------|---------------------------------------------------------------------------------|------------------------------------------------------------------------------------------------------------------------------------------------|--------------------------------|
| Joshi, Jasmin           | Prof. Landscape Ecology                                                         | HSR Hochschule fuer Technik Rapperswil, Institute for Landscape and Open Space                                                                 | Switzerland                    |
| Josiah, Kyrone          | Ecology                                                                         | University of KwaZulu-Natal                                                                                                                    | South Africa                   |
| Jost, Francois          | Postdoctoral Researcher in Climate Change                                       | Royal Roads University                                                                                                                         | Canada                         |
| Jouglin, Maggy          | biology engineer                                                                | Institut National de Recherche Agronomique                                                                                                     | France                         |
| JOURDAN, Hervé          | Research Scientist / Ecology and biological invasions                           | IRD, French National research Institute for Sustainable Development, UMR 237 IMBE                                                              | New Caledonia                  |
| JOURDAN, Clément        | PhD student in Ecology                                                          | CNRS / LIENSs Institute                                                                                                                        | France                         |
| Jourdan-Pineau, Hélène  | Evolutionary Ecology                                                            | CIRAD                                                                                                                                          | France                         |
| Journé, Valentin        | PhD Student                                                                     | INRA                                                                                                                                           | France                         |
| Journet, Alan           | Professor emeritus                                                              | Southeast Missouri State University                                                                                                            | United States of America (the) |
| Journet, Etienne-Pascal | Senior scientist - Agronomy, Plant biology                                      | CNRS and INRAE                                                                                                                                 | France                         |
| Jouve, Bertrand         | Senior researcher - mathematics                                                 | CNRS                                                                                                                                           | France                         |
| Joux, Fabien            | Associate Professor, Marine microbial ecology                                   | Microbial Oceanography Laboratory, Sorbonne University, CNRS                                                                                   | France                         |
| Jouzel, Jean            | Scientist (Emeritus)                                                            | LSCE/IPSL                                                                                                                                      | France                         |
| Jowers, Michael Joseph  | Postdoctoral Researcher/Evolutionary Genetics                                   | CIBIO/InBIO, Centro de Investigação em Biodiversidade e Recursos Genéticos, Universidade do Porto. Campus de Vairão, 4485-661 Vairão, Portugal | Portugal                       |
| Joy, Mike               | Ecologist                                                                       | Victoria University                                                                                                                            | New Zealand                    |
| Joye, Patrick           | Phd Student, Evolutionary Biology                                               | Lausanne University                                                                                                                            | Switzerland                    |
| Juarez, Julio           | Senior Chemist                                                                  | AMSA                                                                                                                                           | Guatemala                      |
| Juárez Núñez, Apolonio  | Responsable del Centro de Estudios en Energía Ambiente y Cambio Climático, BUAP | Benemérita Universidad Autónoma de Puebla                                                                                                      | Mexico                         |
| Juarranz, Yasmina       | University Profesor                                                             | Universidad Complutense de Madrid                                                                                                              | Spain                          |
| Judd, Louise            | Laboratory Manager Bacterial Genomics                                           | Monash University                                                                                                                              | Australia                      |
| Juez, Oscar             | PhD student                                                                     | Max Planck Institute for Molecular Genetics                                                                                                    | Germany                        |
| Juhi, Zakia             | Coral Reef Ecologist                                                            | University of Science, Malaysia                                                                                                                | Bangladesh                     |
| Julich, Stefan          | Researcher, Soil Science                                                        | Institute of Soil Science and Site Ecology, TU Dresden                                                                                         | Germany                        |
| Julietta, Carilla       | Researcher - Ecology                                                            | CONICET                                                                                                                                        | Argentina                      |
| Jüling, André           | Physical Oceanography                                                           | Institute for Marine and Atmospheric research Utrecht                                                                                          | Netherlands (the)              |
| Jumman, Ashiel          | Agricultural Engineer                                                           | South African Sugarcane Research Institute                                                                                                     | South Africa                   |
| Jumtow, Jasmin          | Health promoter / Health sciences                                               | Federal Health insurance in Germany                                                                                                            | Germany                        |
| Junaedi, Decky          | Ecologist (Invasion ecology and plant conservation)                             | Cibodas Botanical Garden - Indonesian Institute of Sciences (LIPI)                                                                             | Indonesia                      |
| Jung, Sascha            | PD Dr. rer. nat. Dipl.-Ing. Biochemistry and Biotechnology                      | Technische Universität Berlin                                                                                                                  | Germany                        |
| Jung, Patrick           | PostDoc, Botany                                                                 | TU Kaiserslautern                                                                                                                              | Germany                        |
| Jung, Jean-Luc          | Senior scientist                                                                | Université de Brest                                                                                                                            | France                         |
| Junker, Jessica         | Postdoc, conservation biology, primates, large mammals                          | Max Planck Institute for Evolutionary Anthropology                                                                                             | Germany                        |
| Junoy, Juan             | Professor                                                                       | Universidad de Alcalá                                                                                                                          | Spain                          |

|                       |                                                                        |                                                                      |                                        |
|-----------------------|------------------------------------------------------------------------|----------------------------------------------------------------------|----------------------------------------|
| Junquas, Clementine   | Researcher                                                             | IGE/IRD                                                              | France                                 |
| Junqueira, Andre      | Postdoctoral researcher                                                | Universitat Autònoma de Barcelona                                    | Spain                                  |
| Jupiter, Stacy        | Melanesia Regional Director                                            | Wildlife Conservation Society                                        | Fiji                                   |
| Jurasinski, Gerald    | Associate Professor, Landscape Ecology                                 | University of Rostock                                                | Germany                                |
| Juretić, Davor        | Professor Emeritus and scientific adviser/ physics biophysics          | Mediterranean Institute for Life Sciences                            | Croatia                                |
| Jusik, Szymon         | Assistant Professor, environmental engineering                         | Poznan University of Life Sciences                                   | Poland                                 |
| Juste, Javier         | Assistant Professor                                                    | Doñana Biological Station (CSIC)                                     | Spain                                  |
| Justel, Ana           | Associate Professor in Statistics                                      | Universidad Autónoma de Madrid                                       | Spain                                  |
| Juszczak, Radosław    | Professor                                                              | Poznan University of Life Sciences                                   | Poland                                 |
| Juteau, Christy       | Registered Professional Biologist                                      |                                                                      | Canada                                 |
| Jüttler, Andreas      | Academic Staff Member at the Chair of Business and Economics Education | University of Konstanz                                               | Germany                                |
| Juvany Canovas, Laura | PhD Conservation Biology                                               | SLU Swedish University of Agricultural Sciences                      | Sweden                                 |
| Juvinyà, Carla        | Ecology PhD Candidate                                                  | CTFC                                                                 | Spain                                  |
| K, Yoganand           | Wildlife conservation                                                  |                                                                      | Lao People's Democratic Republic (the) |
| Kaandorp, M.Y.        |                                                                        | NIOO-KNAW                                                            | Netherlands (the)                      |
| Kaaronen, Roope       | Doctoral Candidate, Environmental Policy                               | University of Helsinki, Helsinki Institute of Sustainability Science | Finland                                |
| Kaasik, Marko         | Senior researcher of air pollution modelling                           | Institute of Physics, University of Tartu                            | Estonia                                |
| Kaasik, Helle         | researcher / physics, religious studies                                | University of Tartu                                                  | Estonia                                |
| kabasakal, bekir      | post-doc researcher                                                    | akdeniz university                                                   | Turkey                                 |
| Kabdebon, Claire      | Postdoctoral fellow                                                    | Yale University                                                      | United States of America (the)         |
| Kaczanowski, Andrzej  | Professor emeritus , Biology                                           | Faculty of Biology, Warsaw University                                | Poland                                 |
| Kaczmarek, Nicolas    | PhD student                                                            | Evolutionary Biology & Ecology                                       | Belgium                                |
| Kagansky, Alexander   | Scientist, molecular medicine                                          | Far Eastern Federal University                                       | Russian Federation (the)               |
| Kagumba, Robert       | Assistant professor of biology and science education                   | DELTA STATE UNIVERSITY                                               | United States of America (the)         |
| Kahanamoku, Sara      | PhD Candidate                                                          | University of California, Berkeley                                   | United States of America (the)         |
| Kahle, Emma           | Paleoclimate                                                           | University of Washington                                             | United States of America (the)         |
| Kahlke, Tim           | Postdoctoral Research Associate, Bioinformatics/Genetics               | Climate Change Cluster, University of Technology Sydney, Australia   | Australia                              |
| Kahnt, Belinda        |                                                                        | MLU Halle                                                            | Germany                                |
| Kainu, Annina         | Economist                                                              |                                                                      | Finland                                |
| Kainz, Martin         | Research Scientist                                                     | WasserCluster Lunz                                                   | Austria                                |
| Kaiser, Aurélien      | PhD Student                                                            | UCLouvain                                                            | Belgium                                |
| Kaiser, Sara          | Research Ecologist                                                     | Cornell Lab of Ornithology                                           | United States of America (the)         |
| Kaiser, Mathsi        | Neuroscience                                                           | Charité Berlin                                                       | Germany                                |
| Kaissling, Karl-Ernst | Biologist, Emeritus                                                    | Max-Planck-Society                                                   | Germany                                |
| Kajee, Mohammed       | MSc candidate                                                          | University of Cape Town                                              | South Africa                           |
| Kajzer-Bonk, Joanna   | PhD / Biologist                                                        | Institute of Nature Conservation Polish Academy of Sciences          | Poland                                 |

|                       |                                                                                                    |                                                                           |                                |
|-----------------------|----------------------------------------------------------------------------------------------------|---------------------------------------------------------------------------|--------------------------------|
| Kakati, Kashmira      | Wildlife Biology                                                                                   |                                                                           | India                          |
| Kakouei, Karan        | Postdoctoral researcher                                                                            | Leibniz Institute of Freshwater Ecology and Inland Fisheries (IGB)        | Germany                        |
| Kalapala, Babu Rao    | Former Chief Scientist                                                                             | Indian Institute of Chemical Technology, Hyderabad                        | India                          |
| Kalayil, Sissy        | Postdoctoral Fellow in Biochemistry                                                                | European Molecular Biology Laboratory Grenoble                            | France                         |
| Kalbe, Johannes       | Researcher in Palaeoecology/Forest Ecology/Landscape Ecology                                       | University of Rostock                                                     | Germany                        |
| KALBOUSSI, Mohsen     | Assistant professor in Animal Ecology                                                              | Institut Supérieur Agronomique de Chat Mariam                             | Tunisia                        |
| Kalén, Ola            | Oceanographer                                                                                      | Swedish Meteorological and Hydrological Institute                         | Sweden                         |
| KALINOWSKA, ANNA      | Dr, Ecologist- Zoologist, Sustainable Development                                                  | The University of Warsaw                                                  | Poland                         |
| Kalitzkus, Vera       | Senior Researcher, medical anthropologist                                                          | Institute of General Practice, Medical Faculty, University of Duesseldorf | Germany                        |
| Källander, Hans       | Ecologist. retired                                                                                 | Dept of Biology                                                           | Sweden                         |
| Källström, Björn      |                                                                                                    | Gothenburg Marine Biological Laboratory                                   | Sweden                         |
| Kalmus, Peter         | Data Scientist                                                                                     | Jet Propulsion Laboratory                                                 | United States of America (the) |
| KALOTERAKIS, NIKOLAOS | MSc Student                                                                                        | Wageningen University/NIOO KNAW                                           | Greece                         |
| Kaltenpoth, Martin    | Professor, Evolutionary Ecology                                                                    | Johannes Gutenberg University Mainz                                       | Germany                        |
| Kalyanaraman, Dhevi   | PhD student, Biology                                                                               | Institute of Evolution and Biodiversity                                   | Germany                        |
| Kamai, Ronnie         | Dept. of Structural Engineering                                                                    | Ben-Gurion University of the Negev                                        | Israel                         |
| Kamal, Adam           | Conservation biologist                                                                             | University of Wisconsin                                                   | United States of America (the) |
| KAMBURSKA, Lyudmila   | Researcher                                                                                         | CNR                                                                       | Italy                          |
| Kamcke, Claudia       | Biologist                                                                                          |                                                                           | Germany                        |
| Kamenova, Stefaniya   | Postdoc in ecology                                                                                 | University of Oslo                                                        | Norway                         |
| Kamgang, Serge Alexis | Conservation biologist                                                                             | Biodiversite-Environnement et Developpement Durable (BEDD)                | Cameroon                       |
| Kamimura, Vitor       | PhD student                                                                                        | São Paulo State University (UNESP)                                        | Brazil                         |
| Kaminski, Gwenaél     | Research Scientist in Cognitive sciences                                                           | Toulouse University                                                       | France                         |
| Kammann, Claudia      | Professor Climate Change Impact Research for Special Crops, Biogeochemistry, greenhouse gas fluxes | Hochschule Geisenheim University                                          | Germany                        |
| Kammerer, Johannes    | Environmental Physics                                                                              | Institute of Environmental Physics, Heidelberg                            | Germany                        |
| Kamp, Ulrich          | Professor                                                                                          | University of Michigan-Dearborn                                           | United States of America (the) |
| kampel, silvana       | Ecologist                                                                                          | INPE                                                                      | Brazil                         |
| Kampel, Sonia         | Master Student in Media- and Instructional Psychology                                              | Chemnitz University of Technology                                         | Germany                        |
| Kampel, Milton        | Senior Researcher                                                                                  | National Institute for Space Research - INPE                              | Brazil                         |
| Kampo, Ibrahima       | Network Manager                                                                                    | Sustainable Development Solution Network in SAHEL                         | Mali                           |
| Kamsteeg, Frans       | Associate Professor Organization Studies                                                           | Vrije Universiteit Amsterdam                                              | Netherlands (the)              |
| Kane, gordon          | professor of physics                                                                               | university of michigan                                                    | United States of America (the) |
| Kanerva, Minna        | Researcher / Sustainability Research                                                               | Sustainability Research Center (artec) - University of Bremen             | Germany                        |
| Kanka, Róbert         | Scientific reearcher                                                                               | Institute of Landscape Ecology Slovak Academy of Sciences                 | Slovakia                       |

|                            |                                                                             |                                                                           |                                                            |
|----------------------------|-----------------------------------------------------------------------------|---------------------------------------------------------------------------|------------------------------------------------------------|
| Kann, Jacob                | Aquatic Ecologist                                                           | Aquatic Ecosystem Sciences                                                | United States of America (the)                             |
| Kannah, John               | Instructor, Forestry (Marine Ecosystem Based Management and Climate change) | University of Liberia                                                     | Liberia                                                    |
| Kapriel, Tarek             | Assistant Professor                                                         | Al Baha University                                                        | Saudi Arabia                                               |
| Kapitulcinova, Dana        | Researcher                                                                  | Charles University Environment Centre                                     | Czech Republic (the)                                       |
| Kaplan, Robert             | Professor Emeritus of Biology                                               | Reed College                                                              | United States of America (the)                             |
| Kaplan, Melissa            | Manager of Ecological Sciences                                              | BSC Group                                                                 | United States of America (the)                             |
| Kappes, Peter              | Wildlife Biologist                                                          | National Wildlife Research Center                                         | United States of America (the)                             |
| Kapsali, Chrysi            | Biologist                                                                   | EMBL                                                                      | Italy                                                      |
| Kapun, MARTIN              | Group Leader                                                                | University of Zürich                                                      | Switzerland                                                |
| Karaduman, Cana            | Phd Candidate                                                               | Tilburg University                                                        | Netherlands (the)                                          |
| karakas, tahir             | Assistant professor - Philosophy                                            | Munzur University                                                         | Turkey                                                     |
| Karaouzas, Ioannis         | Researcher                                                                  | Hellenic Centre for Marine Research                                       | Greece                                                     |
| Karell, Patrik             | Academy Research Fellow                                                     | Novia University of Applied Sciences                                      | Finland                                                    |
| KARIMI, Elham              | Postdoctoral researcher                                                     | Station Biologique de Roscoff/ CNRS- Sorbonne University                  | France                                                     |
| Karimi-Rouzbahani, Hamid   | Postdoctoral Research Fellow                                                | Macquarie University                                                      | Australia                                                  |
| Karinou, Eleni             | Postdoctoral research associate                                             | Newcastle University                                                      | United Kingdom of Great Britain and Northern Ireland (the) |
| Karlsson, Therese          | PhD                                                                         | Department of marine sciences Gothenburg University                       | Sweden                                                     |
| Karn, Santosh Kumar        | Associate Professor                                                         | Sardar Bhagwan Singh University, Balawala, Dehradun, India                | India                                                      |
| Karn, Santosh Kr.          | Associate Professor                                                         | Sardar Bhagwan Singh University, Balawala, Dehradun, India                | India                                                      |
| Karna, Sandeep             | PhD Candidate                                                               | Massey University                                                         | New Zealand                                                |
| Karowe, David              | Professor of Biological Sciences                                            | Western Michigan University                                               | United States of America (the)                             |
| Karp, Tamara               | Environmental Sciences                                                      | TU Dresden                                                                | Germany                                                    |
| Karpan, Kirby              | Biological Science Technician III                                           | NOAA - National Marine Fisheries Service, Alaska Fisheries Science Center | United States of America (the)                             |
| Karpińska-Kołaczek, Monika | Postdoctoral researcher                                                     | Adam Mickiewicz University, Poznań                                        | Poland                                                     |
| Karr, James                | Professor Emeritus                                                          | University of Washington, Seattle, Washington                             | United States of America (the)                             |
| Karr, Steve                | Professor of Biology                                                        | Carson-Newman University                                                  | United States of America (the)                             |
| Karr, Susan                | Assistant Professor of Biology                                              | Carson-Newman University                                                  | United States of America (the)                             |
| Kashef, Youssef            | Graduate Assistant                                                          | TU Berlin                                                                 | Germany                                                    |
| Kashyap, Rajnandani        | PhD Student                                                                 | CSIR-IICT                                                                 | India                                                      |
| Kasper, Claudia            | Researcher - Animal Genetics                                                | Agroscope                                                                 | Switzerland                                                |
| Kaspersen, Kristin         | Research scientist, FT-IR gas analysis.                                     | SINTEF                                                                    | Norway                                                     |
| Kastrup, Ulrike            | Science museum director                                                     | focusTerra / ETH Zurich                                                   | Switzerland                                                |
| Kasuga, Takao              | Research Molecular Geneticist                                               | USDA-ARS                                                                  | United States of America (the)                             |
| Katell, Chantreau          | Dotorante Sciences de l'éducation                                           | Université Rennes 2                                                       | France                                                     |

|                        |                                                                                                  |                                                                                                                   |                                                            |
|------------------------|--------------------------------------------------------------------------------------------------|-------------------------------------------------------------------------------------------------------------------|------------------------------------------------------------|
| Kater, Ilona           | PhD Candidate in Arctic Ecology                                                                  | Durham University                                                                                                 | United Kingdom of Great Britain and Northern Ireland (the) |
| Katharina, Kaiser      | PhD Student, Meteorology                                                                         | Institute for Atmospheric Physics, Uni Mainz                                                                      | Germany                                                    |
| Kathmann, Wiebke       | PhD student                                                                                      |                                                                                                                   | Germany                                                    |
| Katkov, Egor           | Ph.D Candidate in Freshwater Ecology                                                             | McGill University                                                                                                 | Canada                                                     |
| Kato, Akiko            | Research engineer, Ecology                                                                       | CNRS                                                                                                              | France                                                     |
| Katovai, Eric          | Senior Lecturer, Faculty of Science Technology and Environment                                   | The University of the South Pacific                                                                               | Fiji                                                       |
| Kattge, Jens           |                                                                                                  | Max Planck Institute for Biogeochemistry                                                                          | Germany                                                    |
| Kattner, Iris          | Physician                                                                                        | Hausärztliche Gemeinschaftspraxis Lilienthal                                                                      | Germany                                                    |
| Katz, David            | Founder, President                                                                               | True Health Initiative                                                                                            | United States of America (the)                             |
| Katzenberger, Jakob    | Conservation biologist                                                                           | Georg-August University Goettingen                                                                                | Germany                                                    |
| Kauffman, J Boone      | Climate Change Biology                                                                           | Oregon State University                                                                                           | United States of America (the)                             |
| Kauffman, PhD, Stephen | Professor of Social Work                                                                         | Widener University                                                                                                | United States of America (the)                             |
| Kaufman, Les           | Professor of Biology, and Faculty Fellow, Pardee Center for the Study of the Longer-Range Future | Boston University                                                                                                 | United States of America (the)                             |
| Kausrud, Kyrre         | Epidemiologist                                                                                   | Norwegian Veterinary Institute                                                                                    | Norway                                                     |
| Kautz, Lisa-Ann        | Postdoc                                                                                          | Institute of Meteorology and Climate Research, Department Troposphere Research, Karlsruhe Institute of Technology | Germany                                                    |
| KAVANAUGH, DAVID       | Curator Emeritus                                                                                 | California Academy of Sciences                                                                                    | United States of America (the)                             |
| Kawada, Ricardo        | Biologist, Systematic, Comparative Anatomy, and Scientific Photography                           | Universidade Federal da Grande Dourados                                                                           | Brazil                                                     |
| Kaya, Ebru             | Assistant professor, Medicine                                                                    | University of Toronto                                                                                             | Canada                                                     |
| Kayal, Mohsen          | Researcher                                                                                       | UMR 5110 CEFREM, University of Perpignan                                                                          | France                                                     |
| Kayanne, Hajime        | Professor                                                                                        | Department of Earth and Planetary Science, the University of Tokyo                                                | Japan                                                      |
| Kazda, Marian          | Professor, Plant Ecology                                                                         | Ulm University                                                                                                    | Germany                                                    |
| kebour, samir          | professeur et auteur scientifique                                                                | Fascine Institute                                                                                                 | Algeria                                                    |
| Keck, François         | Postdoctoral Researcher / Freshwater Ecology                                                     | Institut national de la recherche agronomique                                                                     | France                                                     |
| Kecler, Roza           |                                                                                                  | Exeter University                                                                                                 | United Kingdom of Great Britain and Northern Ireland (the) |
| Keeley, Annika         | Senior Environmental Scientist                                                                   | Delta Stewardship Council                                                                                         | United States of America (the)                             |
| Keeley, Sterling       | Professor of Botany Emerita                                                                      | University of Hawaii at Manoa                                                                                     | United States of America (the)                             |
| Keeping, Malcolm       | Senior Entomologist                                                                              | South African Sugarcane Research Institute                                                                        | South Africa                                               |
| Keerthan, R            | PhD student, Computer Science                                                                    | Chennai Mathematical Institute                                                                                    | India                                                      |
| Kehoe, Laura           | Postdoctoral Researcher in conservation                                                          | University of Oxford                                                                                              | United Kingdom of Great Britain and Northern Ireland (the) |
| Kehoe, Joseph          | Lecturer in Computing                                                                            | Institute of Technology Carlow                                                                                    | Ireland                                                    |
| Keighley, Xénia        | Biologist                                                                                        | University of Copenhagen & University of Groningen                                                                | Netherlands (the)                                          |
| Keighley, Miles        | Honorary senior lecturer                                                                         | Australian national University                                                                                    | Australia                                                  |
| Keil, Katelyn          | Biology                                                                                          | California State University Northridge                                                                            | United States of America (the)                             |

|                     |                                                        |                                                                |                                                            |
|---------------------|--------------------------------------------------------|----------------------------------------------------------------|------------------------------------------------------------|
| Keiter, Mark        | Geology, Deputy Museum Director                        | Naturkunde-Museum Bielefeld                                    | Germany                                                    |
| Keith, Mark         | Lecturer Zoology                                       |                                                                | South Africa                                               |
| Keitt, Timothy      | Professor                                              | University of Texas at Austin                                  | United States of America (the)                             |
| Keizer, Jan         | Principal Researcher                                   | CESAM, University of Aveiro                                    | Portugal                                                   |
| Ķeksis, Džespers    | akadēmiķis                                             | Latvijas Mūldoloģijas akadēmija                                | Latvia                                                     |
| Kelchner, Scot      | Research Associate                                     | Oregon State University                                        | United States of America (the)                             |
| Keller, Peter       | Structural biology and software development            |                                                                | United Kingdom of Great Britain and Northern Ireland (the) |
| Keller, Alexander   | Group Leader, Molecular Ecology                        | University of Würzburg                                         | Germany                                                    |
| Keller, Reuben      | Associate Professor of Environmental Science           | Loyola University Chicago                                      | United States of America (the)                             |
| Kellerer, Aglaé     | Engineer                                               | European Southern Observatory                                  | Germany                                                    |
| Kellermann, Vanessa | Research Fellow evolutionary biologist                 | Monash University                                              | Australia                                                  |
| Kelleway, Jeff      | Research Fellow                                        | University of Wollongong                                       | Australia                                                  |
| Kelley, Scott T.    | Professor of Biology                                   | San Diego State University                                     | United States of America (the)                             |
| Kelly, Robert       | retired oncolgy reasearcher (MSc Research in Oncology) | Sunnybrook Hospital                                            | Canada                                                     |
| Kelt, Douglas       | Professor                                              | University of California Davis                                 | United States of America (the)                             |
| Kemenes, Thomas     | Ecology                                                | Ecomares                                                       | Colombia                                                   |
| Kemp, Daniel        | Lab Technician                                         | Capital Regional District                                      | Canada                                                     |
| Kemp, Joanna Lynn   | Researcher, Freshwater Ecology                         | NIVA (Norwegian Water Research Institute)                      | Norway                                                     |
| Kemppinen, Krista   | ASU-CI Postdoctoral Fellow                             | Arizona State University                                       | United States of America (the)                             |
| Kendall, Bruce      | Professor of Environmental Science & Management        | University of California, Santa Barbara                        | United States of America (the)                             |
| Kennard, Deborah    | Professor, Environmental Science                       | Colorado Mesa University                                       | United States of America (the)                             |
| Kennard, Paul       | Fluvial Geomorphologist                                | Mount Rainier National Park                                    | United States of America (the)                             |
| Kennedy, Ashley     | Entomologist, Postdoctoral Researcher                  |                                                                | United States of America (the)                             |
| Kennedy, Martyn     | Research Fellow, Department of Zoology                 | University of Otago                                            | New Zealand                                                |
| Kennedy, Thomas     | Buohydrologist                                         | The Nature Conservancy                                         | United States of America (the)                             |
| Kennedy, Emma       | Research Scientist                                     | University of Queensland                                       | Australia                                                  |
| Kennedy, Peter      | Post-doctoral Research Fellow                          | Environment and Sustainability Institute, University of Exeter | United Kingdom of Great Britain and Northern Ireland (the) |
| Kennedy, Alice      | PhD Student/Biology                                    | KU Leuven                                                      | Belgium                                                    |
| Kenney, Suzanne     | Chemistry Instructor                                   | Colorado Mesa University                                       | United States of America (the)                             |
| Kenny, Dianna       | Professor of Psychology                                | The University of Sydney                                       | Australia                                                  |
| Kent, Rosalind      | Retired Zoologist and Medical Practitioner             | NHS                                                            | United Kingdom of Great Britain and Northern Ireland (the) |
| Kent, Clement       | Research Associate, Honey Bee Genetics                 | York University                                                | Canada                                                     |
| Kent, Vivien        | Wildlife Biologist                                     | Independent                                                    | United Kingdom of Great Britain and Northern Ireland (the) |
| Kent, Graham        | Senior Instructor of Biologi Laboratories              | Smith College                                                  | United States of America (the)                             |
| Kent, Rosalind      | Medical Practitioner and Zoologist                     | Retired                                                        | United Kingdom of Great Britain and Northern Ireland (the) |

|                         |                                                                                        |                                                                                                                  |                                                            |
|-------------------------|----------------------------------------------------------------------------------------|------------------------------------------------------------------------------------------------------------------|------------------------------------------------------------|
| Kenter, Jasper          | Associate Professor in Ecological Economics                                            | University of York                                                                                               | United Kingdom of Great Britain and Northern Ireland (the) |
| kenward, john           | Veterinary Surgeon                                                                     | Royal College of Veterinary Surgeons                                                                             | United Kingdom of Great Britain and Northern Ireland (the) |
| Keppel, Gunnar          | Associate Professor in Environmental Biology                                           | University of South Australia                                                                                    | Australia                                                  |
| Keppel, Erica           | Marine Biologist                                                                       | Smithsonian Environmental Research Center                                                                        | United States of America (the)                             |
| Keppeler, Friedrich     | Graduate student                                                                       | Texas A&M University                                                                                             | United States of America (the)                             |
| Keppler, Ruth           | Post-Doc Geology                                                                       | University Bonn                                                                                                  | Germany                                                    |
| Kerchev, Ivan           | Senior Researcher, PhD in ecology (forest entomology)                                  | Institute of Monitoring of Climatic and Ecological Systems of the Siberian Branch of Russian Academy of Sciences | Russian Federation (the)                                   |
| KERDELHUE, Carole       | Researcher, population genetics                                                        | INRA, CBGP                                                                                                       | France                                                     |
| Kerdiles, Herve         | Scientific Officer, Food Security Unit                                                 | European Commission Joint Research Centre                                                                        | Italy                                                      |
| Kerfriden, Baptiste     | PhD student in wood and forest science                                                 | INRA                                                                                                             | France                                                     |
| Kerhervé, Philippe      | Dr., assistant professor                                                               | Cefrem, University of Perpignan                                                                                  | France                                                     |
| Kerhoas, daphne         | Lecturer in Conservation Science                                                       | Bristol Zoological Society                                                                                       | United Kingdom of Great Britain and Northern Ireland (the) |
| Keriö, Susanna          | Postdoctoral research associate                                                        | Oregon State University                                                                                          | Finland                                                    |
| Kerkamm, Dr. Ingo       | Geoscientist                                                                           |                                                                                                                  | Germany                                                    |
| Kerkow, Antje           | Freshwater ecologist                                                                   | Institut für Gewässerökologie und Binnenfischei (IGB)                                                            | Germany                                                    |
| Kerlinger, Paul         | Consultant to wind and solar companies on wildlife issues                              | Independent Ph.D. - Biology - 50 papers in peer reviewed journals and 5 books                                    | United States of America (the)                             |
| Kermek, Dragutin        | Full Professor Information Systems                                                     | University of Zagreb                                                                                             | Croatia                                                    |
| Kerou, Melina           | Senior Scientist                                                                       | University of Vienna                                                                                             | Austria                                                    |
| Kerr, Yann              | Expert in remote sensing, head of unit                                                 | CNES:CESBIO                                                                                                      | France                                                     |
| Kerr, Jeremy            | Professor of Biology                                                                   | University of Ottawa                                                                                             | Canada                                                     |
| Kerschbaum, Franz       | Full Professor of Observational Astrophysics                                           | University Vienna                                                                                                | Austria                                                    |
| Kershaw, Michael        | Assoc Prof Cancer Research                                                             | Peter MacCallum Cancer Centre                                                                                    | Australia                                                  |
| Kershenbaum, Arik       | Zoologist                                                                              | Girton College, University of Cambridge                                                                          | United Kingdom of Great Britain and Northern Ireland (the) |
| Kerstel, Erik           | Professor of Physics                                                                   | Université Grenoble Alpes                                                                                        | France                                                     |
| Kersting, Diego K.      | Researcher Marine Ecology                                                              | Universitat de Barcelona                                                                                         | Spain                                                      |
| Kertesz, Miklos         | associate research professor                                                           | MTA Okologiai Kutatóközpont / MTA Centre for Ecological Research                                                 | Hungary                                                    |
| Kervella, Pierre        | Astronomer                                                                             | Observatoire de Paris                                                                                            | France                                                     |
| Kesnerova, Lucie        | microbiology                                                                           | university of lausanne                                                                                           | Switzerland                                                |
| Kesse-guyot, Emmanuelle | Senior Researcher nutritional epidemiology                                             | Inra                                                                                                             | France                                                     |
| Kett, Gary              | Phd/ecology                                                                            | University college cork                                                                                          | Ireland                                                    |
| Kettwich, Alexander     | Associate Environmental Engineer                                                       | University of Michigan/Environmental Consulting & Technology, Inc.                                               | United States of America (the)                             |
| Keuroghlian, Alexine    | Coordinator Peccary Project and WWF Brazil Consultant on CEPF project Cerrado Pantanal | IUCN/SSC Peccary Specialist Group                                                                                | Brazil                                                     |

|                      |                                                        |                                                                             |                                                            |
|----------------------|--------------------------------------------------------|-----------------------------------------------------------------------------|------------------------------------------------------------|
| KEY, Anthony         | Professor Emeritus (Physics)                           | University of Toronto                                                       | Canada                                                     |
| Khachatryan, Hayk    | Theoretical Physicist                                  |                                                                             | United Kingdom of Great Britain and Northern Ireland (the) |
| Khadraoui, Mehdi     | Evolutionary biologist                                 |                                                                             | Germany                                                    |
| Khalatbari, Leili    | PhD Student                                            | CIBIO/InBIO, University of Porto Portugal                                   | Portugal                                                   |
| Khalife, Jade        | Health systems                                         | American University of Beirut, Ministry of Public Health                    | Lebanon                                                    |
| Khalil, Elie         | Research Assistant - Epidemiology/Remote Sensing       | UCLouvain                                                                   | Belgium                                                    |
| Khaliq, Imran        | Assistant Professor                                    | Ghazi University                                                            | Pakistan                                                   |
| Kharel, Mohan        | Professor, Genetics                                    | Tribhuvan University                                                        | Nepal                                                      |
| Khebbeb, Khaled      | Research and teaching assistant - Computer Science     | University of Pau                                                           | France                                                     |
| Ki, Tiffany          | Applied Ecology and Conservation                       | University of East Anglia                                                   | United Kingdom of Great Britain and Northern Ireland (the) |
| Kibblewhite, Mark    | Emeritus Professor of Soil Science                     | Cranfield University                                                        | United Kingdom of Great Britain and Northern Ireland (the) |
| Kick, Leonhard       |                                                        | Ludwig-Maximilians-Universität München                                      | Germany                                                    |
| Kidawa, Dorota       | PhD in Biology                                         | University of Gdansk                                                        | Poland                                                     |
| Kidder, Allison      | Director Point Reyes Field Station/plant ecophysiology | University of California Berkeley                                           | United States of America (the)                             |
| Kidyoo, Aroonrat     | Instructor                                             | Department of Botany, Faculty of Science, Chulalongkorn University          | Thailand                                                   |
| Kielland, Knut       | Professor of Ecology                                   | University of Alaska Fairbanks                                              | United States of America (the)                             |
| Kiener, Jürgen       | research scientist                                     | CSNSM, CNRS-IN2P3 and University Paris Sud                                  | France                                                     |
| Kienle, Cornelia     | Scientist in aquatic ecotoxicology                     | Swiss Centre for Applied Ecotoxicology                                      | Switzerland                                                |
| Kiesel, Jens         | Research Scientist                                     | Leibniz-Institute of Freshwater Ecology and Inland Fisheries                | Germany                                                    |
| KIHUMURO, Phillip    | Research Associate/Biodiversity/Climate Science        | World Agroforestry                                                          | Uganda                                                     |
| Kildisheva, Olga     | Scientist                                              | University of Western Australia                                             | Australia                                                  |
| Kilian, Norbert      |                                                        | Freie Universitaet Berlin, Botanischer Garten und Botanisches Museum Berlin | Germany                                                    |
| Killcoyne, Sarah     | Research Associate, Computational Cancer Genetics      | Cambridge University                                                        | United Kingdom of Great Britain and Northern Ireland (the) |
| Killeen, Daniel      | Chemist                                                | The New Zealand Institute for Plant and Food Research                       | New Zealand                                                |
| Killeen, Helen       | Graduate Student                                       | UC Davis                                                                    | United States of America (the)                             |
| Killen, Richard      | Professor of Microbiology                              | University Center - College of Lake County                                  | United States of America (the)                             |
| Killian, Amanda      | PhD Candidate                                          | Macquarie University                                                        | Australia                                                  |
| Kilolu, Layla        | Ph.D. candidate, Urban and Regional Planning           | University of Hawaii at Manoa                                               | United States of America (the)                             |
| Kim, Christopher     | Master's                                               | University of Hawaii at Manoa                                               | United States of America (the)                             |
| Kimball, Heather     | Lecturer/Consultant                                    | Pacific Science Advocates                                                   | United States of America (the)                             |
| Kimble, Steven       | Clinical Assistant Professor                           | Towson University                                                           | United States of America (the)                             |
| Kimbrough, Elizabeth | Ecology                                                | Dillard University                                                          | United States of America (the)                             |
| Kimmel, Nathan       | Environmental Engineering                              | University of Michigan                                                      | United States of America (the)                             |

|                        |                                                        |                                                                            |                                                            |
|------------------------|--------------------------------------------------------|----------------------------------------------------------------------------|------------------------------------------------------------|
| Kin, Alicia            | Profesor Adjunto                                       | Facultad de Agronomía-UNLPam                                               | Argentina                                                  |
| Kindt, Roeland         | senior ecologist                                       | World Agroforestry Centre (ICRAF)                                          | Kenya                                                      |
| King, James            | DPhil Candidate in Climate Science                     | University of Oxford                                                       | United Kingdom of Great Britain and Northern Ireland (the) |
| King, Dr Gaylord Skip  | retired pheromone chemist                              | Simon Fraser University                                                    | Canada                                                     |
| King, Alexander        | Postdoctoral Researcher                                | Technical University of Denmark                                            | United States of America (the)                             |
| King, Tania            | Genetics Technician                                    | University of Otago                                                        | New Zealand                                                |
| King, Nicholas         | Independent Consultant and Researcher in global change |                                                                            | South Africa                                               |
| King, GM               | Professor                                              | Louisiana State University                                                 | United States of America (the)                             |
| King, Edward           | Senior Geophysicist                                    | British Antarctic Survey                                                   | United Kingdom of Great Britain and Northern Ireland (the) |
| King, John             | Professor/Ecosystem Science                            | North Carolina State University                                            | United States of America (the)                             |
| Kingma, Sytze          | associate professor                                    | VU Amsterdam                                                               | Netherlands (the)                                          |
| Kinkel, Hanno          | Science Coordinaor                                     | School of Geography, Earth and Environmental Sciences, Plymouth University | United Kingdom of Great Britain and Northern Ireland (the) |
| Kinnard, Christophe    | Professor, environmental sciences                      | UQTR                                                                       | Canada                                                     |
| Kinross, Cilla         | Adjunct Lecturer, Environmental Management             | Charles Sturt University                                                   | Australia                                                  |
| Kinsella, Fiadh        | Park Ranger/ Educator/ Medic                           | National Park Service                                                      | United States of America (the)                             |
| Kirby, Keith           | Honorary visiting researcher                           | Department of Plant Sciences, University of Oxford                         | United Kingdom of Great Britain and Northern Ireland (the) |
| Kirca, Simay           | Ass.Prof. / Landscape planning                         | Istanbul University-Cerrahpasa                                             | Turkey                                                     |
| Kirchoff, Bruce        | Professor of Biology                                   | University of North Carolina at Greensboro                                 | United States of America (the)                             |
| Kirkendall, Lawrence   | Professor of Biological Sciences                       | University of Bergen                                                       | Norway                                                     |
| Kirkland, Hannah       | Conservation biology                                   |                                                                            | United Kingdom of Great Britain and Northern Ireland (the) |
| Kirkland, Maire        | PhD student                                            | Durham University                                                          | United Kingdom of Great Britain and Northern Ireland (the) |
| Kirkman, Kevin         | Professor: Grassland Science                           | University of KwaZulu-Natal                                                | South Africa                                               |
| Kirwan, Guy            | Research Associate, Ornithology                        | Field Museum of Natural History, Chicago                                   | United Kingdom of Great Britain and Northern Ireland (the) |
| Kisekelwa, Tchalondawa | Lecturer/associate professor                           | Institut Supérieur de Bukavu                                               | Congo (the Democratic Republic of the)                     |
| Kisel, Yael            | Analytics Lead, Climate Smart Program                  | City of San Jose                                                           | United States of America (the)                             |
| Kisela, Angela         | Environmental Scientist                                |                                                                            | United States of America (the)                             |
| Kiss, Réka             | Research fellow                                        |                                                                            | Hungary                                                    |
| Kissel, Jeffrey        | Controls Engineer / Astrophysics                       | LIGO Hanford Observatory (Caltech)                                         | United States of America (the)                             |
| Kitaba, Abdi           | Biology Teacher                                        | Dambi Dollo University                                                     | Ethiopia                                                   |
| Kitsa, Hugues          | Mathematics teacher                                    | TUT                                                                        | South Africa                                               |
| Kittelman, Sebastian   |                                                        | University of Oxford                                                       | United Kingdom of Great Britain and Northern Ireland (the) |
| Kitts, Nolan           | Research Assistant / Environmental Economics           | Woods Hole Research Center                                                 | United States of America (the)                             |

|                          |                                                    |                                                                                                                |                                                            |
|--------------------------|----------------------------------------------------|----------------------------------------------------------------------------------------------------------------|------------------------------------------------------------|
| Klahr, Barbara           | Observación de Flora y Fauna de la Isla Formentera |                                                                                                                | Spain                                                      |
| Klarenbach, Magdalena    | Ph. D student in Sociology                         | Jagiellonian University                                                                                        | Poland                                                     |
| Klass, Keren             | PhD candidate                                      | University of Toronto                                                                                          | Canada                                                     |
| Klassen, Susanna         | PhD Candidate                                      | Institute for Resources, Environment and Sustainability, University of British Columbia                        | Canada                                                     |
| Klaus, Marcus            | Postdoc - Biogeochemistry                          | Swedish University of Agricultural Sciences                                                                    | Sweden                                                     |
| Klawitter, Jonathan      | PhD Student                                        | University of Auckland                                                                                         | New Zealand                                                |
| Klayn, Stefania          | Researcher, marine biology                         | Institute of Biodiversity and Ecosystem Research, Bulgarian Academy of Sciences                                | Bulgaria                                                   |
| Kleemeyer, Maike         | Postdoc                                            | Max-Planck-Institute for Human Development                                                                     | Germany                                                    |
| Klees van Bommel, Joanna | Master's Student                                   | University of British Columbia                                                                                 | Canada                                                     |
| Klein, Ákos              | Conservation Biologist PhD                         | The Barn Owl Foundation                                                                                        | Hungary                                                    |
| Klein, Nicole            | post doc, paleontology                             | University of Bonn                                                                                             | Germany                                                    |
| Klein, Maximilian        | PHD Pediatric Medicine                             |                                                                                                                | Germany                                                    |
| Klein, Hildegard         | Researcher                                         | Rhodes University                                                                                              | South Africa                                               |
| Klein, Bert              | Biology                                            |                                                                                                                | Canada                                                     |
| KLEIN, Hugh              | Principal Research Scientist                       | National Physical Laboratory (NPL) UK                                                                          | United Kingdom of Great Britain and Northern Ireland (the) |
| Kleinhans, Kerstin       | PhD Candidate - circular economy                   | Ghent University                                                                                               | Belgium                                                    |
| Kleinman Ruiz, Daniel    | PhD Student, Genomics and Conservation             | Estación Biológica de Doñana, EBD-CSIC                                                                         | Spain                                                      |
| Klemm, Paul              | Postdoctoral researcher, Bioinformatics            | Max Planck Institute for Metabolism Research                                                                   | Germany                                                    |
| Klemt, Alexander         | Teacher, M.Sc. Physics                             |                                                                                                                | Germany                                                    |
| Klept, Joghan            | Senior Researcher                                  | Belarus Institute of Climate                                                                                   | Belarus                                                    |
| Kliem, Lea               | Researcher                                         | Institute for Ecological Economy Research / University of Oldenburg                                            | Germany                                                    |
| Kline, Norma             | Conservation Biology                               | US. DOI Fish and Wildlife Service (retired)                                                                    | United States of America (the)                             |
| Klingenfuss, Sara        | PhD student / Plant Ecology and Diversity          | University of Freiburg                                                                                         | Germany                                                    |
| Klinges, David           | PhD Student                                        | University of Florida                                                                                          | United States of America (the)                             |
| Klinman, Judith          | Professor of the Graduate School                   | UC Berkeley                                                                                                    | United States of America (the)                             |
| Klinsmann, Markus        | Research engineer, PhD, Physicist                  | Robert Bosch Corporate Research                                                                                | Germany                                                    |
| Kloos, Stephan           | Senior researcher, Social Anthropology             | Austrian Academy of Sciences                                                                                   | Austria                                                    |
| Kloprogge, Theo          | Adjunct professor geology/chemistry                | University of the Philippines Visayas (Philippines)/University of Queensland (Australia)                       | Philippines (the)                                          |
| Klug, Linus              | PhD-student, geology                               | Universität Bonn                                                                                               | Germany                                                    |
| Klug, Christian          | Professor, palaeontology                           |                                                                                                                | Switzerland                                                |
| Kluge, Tobias            |                                                    | Institute of Environmental Physics, Heidelberg University                                                      | Germany                                                    |
| Kluge, Bjoern            | Assistant Professor                                | Technische Universität Berlin                                                                                  | Germany                                                    |
| Kluger, Lotta            | Postdoctoral researcher                            | Leibniz Center for Tropical Marine Research (ZMT); artec Sustainability Research Center - University of Bremen | Germany                                                    |
| Kluschat, Björn          |                                                    | Institute of atmospheric physics Mainz                                                                         | Germany                                                    |

|                           |                                                                                     |                                                                      |                                                            |
|---------------------------|-------------------------------------------------------------------------------------|----------------------------------------------------------------------|------------------------------------------------------------|
| Kment, Petr               | researcher                                                                          | National Museum, Prague                                              | Czech Republic (the)                                       |
| Kmentová, Nikol           | PhD student                                                                         | Masaryk University                                                   | Czech Republic (the)                                       |
| Kmita, Hanna              | Professor of biological sciences                                                    | Adam Mickiewicz University                                           | Poland                                                     |
| Knacke, Roger             | Astronomer (Emeritus)                                                               | The Pennsylvania State University Erie                               | United States of America (the)                             |
| Knape, Jonas              | Associate Professor in Ecology                                                      | Swedish University of Agricultural Sciences                          | Sweden                                                     |
| Knapp, William            | Co-Founder, Inventor, President and Chief Executive Officer                         | BIO-H2-GEN Inc.                                                      | Canada                                                     |
| Knapp, Sonja              | Geoecologist                                                                        | Helmholtz-Centre for Environmental Research - UFZ                    | Germany                                                    |
| Knees, Dr Sabina          | Research Associate, Centre for Middle Eastern Plants                                | Royal Botanic Garden Edinburgh                                       | United Kingdom of Great Britain and Northern Ireland (the) |
| Kneib, Marin              | PhD student in glaciology                                                           | Swiss Federal Institute for Forest, Snow and Landscape               | Switzerland                                                |
| Knight, Stefan            | Professor of Structural Biology                                                     | Uppsala University                                                   | Sweden                                                     |
| Knight, David             | Structural Biology                                                                  | Dr.                                                                  | United Kingdom of Great Britain and Northern Ireland (the) |
| Knight, Jon               | Research Scientist                                                                  | Griffith University                                                  | Australia                                                  |
| Knight, Christopher       | PhD Student                                                                         | Stanford University                                                  | United States of America (the)                             |
| Knight, Andrew            | Professor of Animal Welfare and Ethics                                              | University of Winchester                                             | United Kingdom of Great Britain and Northern Ireland (the) |
| Knighton, James           | Postdoctoral Fellow                                                                 | The National Socio-Environmental Synthesis Center                    | United States of America (the)                             |
| Knippertz, Peter          | Professor of Meteorology                                                            | Karlsruhe Institute of Technology                                    | Germany                                                    |
| Knisley, Keith            | Biologist                                                                           | Retired - W.L. Gore & Associates Inc                                 | United States of America (the)                             |
| Knispel de Acosta, Saskia | climate science                                                                     | Scientists 4 Future                                                  | Germany                                                    |
| Knoben, Wouter            | Hydrology                                                                           |                                                                      | Canada                                                     |
| Knödlseider, Jürgen       | Astrophysicist                                                                      | CNRS                                                                 | France                                                     |
| Knoerzer, Kai             | Principal Research Scientist / Food Process Engineering                             | Commonwealth Scientific and Industrial Research Organisation (CSIRO) | Australia                                                  |
| Knope, Matthew            | Assistant Professor of Biology                                                      | University of Hawaii at Hilo                                         | United States of America (the)                             |
| Knörnschild, Mirjam       | Biologist                                                                           | Museum für Naturkunde Berlin                                         | Germany                                                    |
| Knorr, Wolfgang           | visiting research scientist                                                         | Lund University                                                      | Sweden                                                     |
| Knott, Alistair           | Associate Professor, Computer Science                                               | University of Otago                                                  | New Zealand                                                |
| Knowles, Travis           | Associate Professor of Biology                                                      | Francis Marion University                                            | United States of America (the)                             |
| Knudsen, Kerry            | Lichenologist, Mycologist                                                           | University of Life Sciences in Prague                                | Czech Republic (the)                                       |
| Knutson Jr, Arthur C      | Retired Senior Fishery Biologist, MS Fisheries Biologist, Humboldt State University | California Department of Fish and Game                               | United States of America (the)                             |
| Kobrow, Christian         | Physic Master Student                                                               | University Heidelberg                                                | Germany                                                    |
| Koç, Gökçe                | Phd Candidate                                                                       | Ege University                                                       | Turkey                                                     |
| Koch, Natalia             | PhD in Ecology                                                                      | Universidade Federal de Mato Grosso do Sul                           | Brazil                                                     |
| Koch, Jack                | Graduate Student                                                                    | Oregon State University                                              | United States of America (the)                             |
| Koch, Susanne             | MD Dr.                                                                              | Charité                                                              | Germany                                                    |
| Koch, Claudia             | Herpetologist                                                                       | Zoological Research Museum Alexander Koenig                          | Germany                                                    |
| Koch, André               | Herpetologist                                                                       | Zoologisches Forschungsmuseum Alexander Koenig                       | Germany                                                    |
| Koch, Alain               | Engineer, chemistry                                                                 | Université de Lorraine                                               | France                                                     |

|                         |                                                                                              |                                                                     |                                                            |
|-------------------------|----------------------------------------------------------------------------------------------|---------------------------------------------------------------------|------------------------------------------------------------|
| Koch, Susanne           | Dr. MD                                                                                       | Charité                                                             | Germany                                                    |
| Koch, Sebastian         | PHD Student                                                                                  | TU Berlin                                                           | Germany                                                    |
| Kociniewska, Katarzyna  | PhD student and specialist of environmental protection                                       | University of Sciences and Technology in Bydgoszcz                  | Poland                                                     |
| Kock, Lutz (geschäftl.) | Dipl.-Ing., Mechanical Engineer                                                              |                                                                     | Germany                                                    |
| Kock, Richard           | Professor Wildlife Health Dept Pathobiology and Population Sciences                          | Royal Veterinary College                                            | United Kingdom of Great Britain and Northern Ireland (the) |
| Kocken, Ilja            | PhD candidate in Palaeoceanography                                                           | Utrecht University                                                  | Netherlands (the)                                          |
| Kocsis, Adam            | PostDoc Researcher, Paleoecology                                                             | University of Erlangen-Nuremberg                                    | Germany                                                    |
| Koeck, Barbara          | Research associate at the Institute of Biodiversity, Animal Health, and Comparative Medicine | University of Glasgow                                               | United Kingdom of Great Britain and Northern Ireland (the) |
| Koehler, Sabrina        | Evolutionary Ecology                                                                         | Kiel University                                                     | Germany                                                    |
| Koehn, Monica           | Psychology                                                                                   | Western Sydney University                                           | Australia                                                  |
| Koelmeyer, Eloise       | Veterinarian                                                                                 | Gungahlin Veterinary hospital                                       | Australia                                                  |
| Koenig, Guillaume       | PhD Physical Oceanography                                                                    | Mediterranean Institute of Oceanography                             | France                                                     |
| Koenig, Walter          | Research Zoologist, Emeritus                                                                 | Univ. California Berkeley                                           | United States of America (the)                             |
| Koenigsberger, Gloria   | Researcher, Astrophysics                                                                     | Universidad Nacional Autonoma de Mexico                             | Mexico                                                     |
| Koentges, Georgy        | Professor of Biomedicine and Evolution                                                       | University of Warwick                                               | United Kingdom of Great Britain and Northern Ireland (the) |
| Koeth, Monica           | Entomology                                                                                   |                                                                     | Germany                                                    |
| Koetje, David           | Professor of Biology                                                                         | Calvin University                                                   | United States of America (the)                             |
| Kohler, Quentin         | Nature project Manager                                                                       | ProNatura                                                           | Switzerland                                                |
| Kohler, Tyler           | Postdoc                                                                                      | EPFL                                                                | Switzerland                                                |
| Köhler, Meike           | ICREA Prof. Head Paleobiology                                                                | Institut Català de Paleontologia                                    | Spain                                                      |
| Koizumi, Shuntaro       | PhD Student                                                                                  | Umeå University                                                     | Sweden                                                     |
| Kok, Anna-Mari          | PhD student in Medicinal Plant Sciences                                                      | University of Pretoria                                              | South Africa                                               |
| Kokeš, Rae              | Field Biologist                                                                              | Matusadona Lion Project                                             | Zimbabwe                                                   |
| Kokkoris, Vasilis       | postdoctoral fellow. Mycology, ecology, genetics                                             | University of Ottawa                                                | Canada                                                     |
| Kokurewicz, Tomasz      | University teacher, ecology                                                                  | Wrocław University of Environmental and Life Sciences               | Poland                                                     |
| Kolada, Agnieszka       | DSc. senior researcher                                                                       | Institute of Environmental Protection - National Research Institute | Poland                                                     |
| Kolankiewicz, Leon      | Senior Environmental Manager                                                                 | Solv LLC                                                            | United States of America (the)                             |
| Kolanowski, Wojciech    | professor / health science                                                                   | Siedlce University                                                  | Poland                                                     |
| Kolb, Chelsea           | Environmental engineering                                                                    |                                                                     | United States of America (the)                             |
| Kolb, Melanie           | Associate Professor                                                                          | Geographical Institute, UNAM                                        | Mexico                                                     |
| Kolda, Anamarija        | M.Sc. Environmental Science                                                                  | Ruder Boskovic Institute                                            | Croatia                                                    |
| Koleček, Jaroslav       | Researcher in ecology                                                                        | The Czech Academy of Sciences, Institute of Vertebrate Biology      | Czech Republic (the)                                       |
| Kolesnikow, Tassia      | Molecular Genetics                                                                           | University of New South Wales                                       | Australia                                                  |
| Kolmes, Steven          | Professor of Environmental Studies and Biology, Molter Chair in Science                      | University of Portland                                              | United States of America (the)                             |

|                         |                                                                                                     |                                                                             |                                                            |
|-------------------------|-----------------------------------------------------------------------------------------------------|-----------------------------------------------------------------------------|------------------------------------------------------------|
| Kolstoe, Simon          | Research Ethics                                                                                     | University of Portsmouth                                                    | United Kingdom of Great Britain and Northern Ireland (the) |
| Koltzenburg, Michael    | Dipl. Biol.                                                                                         | University of Tuebingen                                                     | Germany                                                    |
| Kominoski, John         | Associate Professor                                                                                 | Florida International University                                            | United States of America (the)                             |
| Komonen, Atte           | Senior lecturer in ecology and evolution                                                            |                                                                             | Finland                                                    |
| Komor, Christian        | Neuropsychology                                                                                     | Wright State University                                                     | United States of America (the)                             |
| Kompas, Tom             | Professor of Environmental Economics                                                                | University of Melbourne                                                     | Australia                                                  |
| Könczey, Réka           | biologist, educational researcher                                                                   | Eszterhazy Karoly University - Hungarian Institute for Educational Research | Hungary                                                    |
| Kondor, Imre            | professor of physics                                                                                | retired                                                                     | Hungary                                                    |
| Kondratow, Floriane     | Ecology                                                                                             |                                                                             | France                                                     |
| Könemann, Markus        | group leader                                                                                        | RWTH Aachen University                                                      | Germany                                                    |
| König, Dr. Lutz         | Medicine                                                                                            | Krankenhaus                                                                 | Germany                                                    |
| königson, sara          | researcher                                                                                          | department of aquatic resources                                             | Sweden                                                     |
| Koniuk, Roman           | Professor Physics                                                                                   | York University                                                             | Canada                                                     |
| Konok, Veronika         | Research fellow                                                                                     | Biology Institution, Eötvös University, Budapest                            | Hungary                                                    |
| Koocheki, Alireza       | Professor                                                                                           | Ferdowsi University of Mashhad                                              | Iran (Islamic Republic of)                                 |
| Kool, Richard           | Professor, School of Environment and Sustainability                                                 | Royal Roads University                                                      | Canada                                                     |
| Koontz, Fred            | Wildlife Biology                                                                                    | Retired                                                                     | United States of America (the)                             |
| Koopmans, Marion        | Head, viroscience department, director Emering Infectious Disease Netherlands Centre for One Health | ErasmusMC, Rotterdam                                                        | Netherlands (the)                                          |
| Koorem, Kadri           | Researcher                                                                                          | University of Tartu                                                         | Estonia                                                    |
| Koot, Emily             | Scientist                                                                                           | The New Zealand Institute for Plant & Food Research                         | New Zealand                                                |
| Koot, Stasja            | Assistant Professor                                                                                 | Sociology of Development and Change, Wageningen University                  | Netherlands (the)                                          |
| Kooyman, Robert         | Research Ecologist-Botanist                                                                         | Macquarie University                                                        | Australia                                                  |
| Kopach, Andrii          | PhD candidate                                                                                       | MPI-CBG                                                                     | Germany                                                    |
| Kopecky, Vladimir       | researcher / biophysicist                                                                           | Charles University                                                          | Czech Republic (the)                                       |
| Kopelman, Arthur        | SUNY Distinguished Service Professor and Professor of Science/Ecology at SDUNY/FIT                  | Fashion Institute of Technology of the State University of New York         | United States of America (the)                             |
| Kopljär, Dennis         | Research Associate, Electrochemical Energy Technology                                               | Deutsches Zentrum für Luft- und Raumfahrt (DLR)                             | Germany                                                    |
| Kopnina, Helen          |                                                                                                     | The Hague University of Applied Sciences                                    | Netherlands (the)                                          |
| Koppel, Maximilian      | Research Engineer in climate research on vegetable crops                                            | Hochschule Geisenheim University                                            | Germany                                                    |
| Koppelman, Rolf         | Biological Oceanography                                                                             | University of Hamburg                                                       | Germany                                                    |
| Koppelmeyer, Bernd      | Limnologist                                                                                         | enviteam Umwelt-Netzwerk Gewässer & Landschaft                              | Germany                                                    |
| Koppenleitner, Reinhard | Pediatrician, MPH, Dr. med.                                                                         | KLUG Deutsche Allianz Klimawandel und Gesundheit e.V.                       | Germany                                                    |
| Koproski, Leticia       | Wildlife Veterinarian                                                                               | Triade - Instituto Brasileiro para Medicina da Conservação                  | Brazil                                                     |
| Korb, Julie             | Professor/Environmental Biology                                                                     | Fort Lewis College                                                          | United States of America (the)                             |

|                            |                                                                |                                                                                                           |                                                            |
|----------------------------|----------------------------------------------------------------|-----------------------------------------------------------------------------------------------------------|------------------------------------------------------------|
| Korbut, Zofia              | Laboratory Support Specialist                                  | IIMCB Warsaw                                                                                              | Poland                                                     |
| Kordubel, Katharina        | Masters student                                                | Ghent university                                                                                          | Germany                                                    |
| Korell, Lotte              | Postdoc                                                        | Martin Luther University Halle-Wittenberg, German Centre for Integrative Biodiversity Research (iDiv)     | Germany                                                    |
| Koretsky, Carla            | Geochemistry professor                                         | Western Michigan University                                                                               | United States of America (the)                             |
| Korine, Carmi              | Prof. Animal Ecology                                           | Ben-Gurion University of the Negev                                                                        | Israel                                                     |
| Kormann, Urs               | Researcher, Ecological Research                                | Swiss Ornithological Institute                                                                            | Switzerland                                                |
| Kormas, Konstantinos       | Professor                                                      | University of Thessaly                                                                                    | Greece                                                     |
| Kormos, Laura              | Senior Lecturer in Physics                                     | Lancaster University                                                                                      | United Kingdom of Great Britain and Northern Ireland (the) |
| Korňan, Martin             | Research ecologist and zoologist                               | Technical University in Zvolen                                                                            | Slovakia                                                   |
| Kornder, Niklas            | PhD marine ecology                                             | University of Amsterdam                                                                                   | Netherlands (the)                                          |
| Kornhauser, Isaac          | Physicochemical od surfaces                                    | Universidad Autónoma Metropolitana                                                                        | Mexico                                                     |
| Korochkina, Maria          | PhD Student in Cognitive Science                               | Macquarie University, Australia; University of Potsdam, Germany                                           | Australia                                                  |
| Koroiva, Ricardo           | Postdoctoral researcher                                        | Instituto Nacional de Pesquisas da Amazônia                                                               | Brazil                                                     |
| Korosi, Jennifer           | Assistant Professor, Limnology & Environmental Science         | York University                                                                                           | Canada                                                     |
| Korpelainen, Helena        | Professor                                                      | Unuversity of Helsinki                                                                                    | Finland                                                    |
| KORSTAD, JOHN              | Professor of Biology                                           | Oral Roberts Univ.                                                                                        | United States of America (the)                             |
| Kortschak, R Daniel        | Lecturer in Bioinformatics                                     | The University of Adelaide                                                                                | Australia                                                  |
| Korwin Krukowski, Paolo    | PhD student, Plant Physiology                                  | University of Turin                                                                                       | Italy                                                      |
| Korzeniowski, Konrad       | PhD researcher                                                 | KU Leuven                                                                                                 | Belgium                                                    |
| Koschnitzke, Cristiana     | Professor                                                      | Universidade Federal do Rio de Janeiro                                                                    | Brazil                                                     |
| Koselj, Klemen             | Biology                                                        | Max Planck Institute for Ornithology                                                                      | Germany                                                    |
| Koskela, Elli              | postdoc/plant biology                                          | University of Helsinki                                                                                    | Finland                                                    |
| Kosłowski, Max             | PhD student                                                    | INATECH, Albert Ludwig University Freiburg                                                                | Germany                                                    |
| Kostakis, Vasilis          | Professor                                                      | Tallinn University of Technology                                                                          | Estonia                                                    |
| Köster, Nils               | Scientific curator, Botanic Garden and Botanical Museum Berlin | Freie Universität Berlin                                                                                  | Germany                                                    |
| Koster, PhD, Emlyn         | Adjunct Professor   Anthropocene                               | Department of Marine, Earth and Atmospheric Sciences, North Carolina State University                     | United States of America (the)                             |
| Kotar, Sydney              | Toxicology Laboratory Assistant                                |                                                                                                           | United States of America (the)                             |
| Kotharambath, Ramachandran | Assistant Professor                                            | Central University of Kerala                                                                              | India                                                      |
| Kothawala, Dolly           | Researcher - Freshwater Ecosystems                             | Uppsala University                                                                                        | Sweden                                                     |
| Kotiahho, Janne            | Professor of Ecology, Chair of Finnish National IPBES-panel    | University of Jyväskylä, Department of Biological and Environmental Science and School of Resource Wisdom | Finland                                                    |
| Kotov, Alexey              | Corresponding Member of Russian Academy of Sciences            | A.N. Severtsov Institute of Ecology and Evolution                                                         | Russian Federation (the)                                   |
| Kotowski, Wiktor           | university professor, biology                                  | University of Warsaw, Faculty of Biology                                                                  | Poland                                                     |

|                      |                                                                        |                                                                                              |                                                            |
|----------------------|------------------------------------------------------------------------|----------------------------------------------------------------------------------------------|------------------------------------------------------------|
| Kotrlova, Andrea     | Researcher in Astrophysics                                             | Silesian University in Opava, Research Center for Computational Physics and Data Processing  | Czech Republic (the)                                       |
| Kotta, Jonne         | research professor                                                     | Estonian Marine Institute, University of Tartu                                               | Estonia                                                    |
| Kottelat, Maurice    | Ichthyologists                                                         | .                                                                                            | Switzerland                                                |
| Kouagou, M'Mouyohoun | Ecological Modeling                                                    | Laboratory of Ecology, Botany and Plant Biology, University of Parakou, Republic of Benin    | Benin                                                      |
| koubbi, philippe     | Professor                                                              | Sorbonne Université                                                                          | France                                                     |
| Kouchner, Coline     | Agronomy, PhD Student                                                  | INRA                                                                                         | France                                                     |
| Kouikoglou, Vassilis | Professor                                                              | Technical University of Crete                                                                | Greece                                                     |
| Kovács, Margit       | assistant professor, chemistry                                         | University of Pannonia                                                                       | Hungary                                                    |
| Kovács, Bence        | assistant research fellow                                              | MTA Centre for Ecological Research                                                           | Hungary                                                    |
| Kovacsova, Zuzana    | Early Stage Researcher, Medical Physics                                | University College London                                                                    | United Kingdom of Great Britain and Northern Ireland (the) |
| Kovarovic, Kris      | Associate Professor of Human Evolution                                 | Durham University                                                                            | United Kingdom of Great Britain and Northern Ireland (the) |
| Kowalczyk, Céline    | PhD student                                                            | UHasselt/Ugent                                                                               | Belgium                                                    |
| Kowalczyk, Agnieszka | PhD student in mathematics                                             | Jagiellonian University                                                                      | Poland                                                     |
| Kowalewski, Martin   | Director                                                               | Estacion Biologica Corrientes - Museo Argentino de Ciencias Naturales "Bernardino Rivadavia" | Argentina                                                  |
| Kozakiewicz, Thea    | Research Assistant                                                     | Eawag                                                                                        | Switzerland                                                |
| Kozanayi, Witness    | Postdoctoral Research Fellow (Environmental and Geographical Sciences) | University of Cape Town                                                                      | South Africa                                               |
| Kozelova, Ivana      | research scientist                                                     | Institute of Landscape Ecology, Slovak Academy of Sciences                                   | Slovakia                                                   |
| Koziol, Krystyna     | Research Assistant, Environmental Science                              | Gdansk University of Technology                                                              | Poland                                                     |
| Kozlowski, Jessica   | PhD. Microbiology and Biotechnology                                    | University of Vienna                                                                         | Austria                                                    |
| Kozlowski, Jan       | Professor/ecology and evolution                                        | Jagiellonian University                                                                      | Poland                                                     |
| Kraaijeveld, Ken     | Research fellow Evolutionary Biology                                   | Origins Center                                                                               | Netherlands (the)                                          |
| Kraemer, Robert      | Professor Emeritus/Exercise Physiology                                 | Southeastern Louisiana University                                                            | United States of America (the)                             |
| Kraemer, Benjamin    | Global change aquatic ecologist                                        |                                                                                              | Germany                                                    |
| Kraft, Philipp       | Environmental Science Researcher                                       | Justus Liebig University                                                                     | Germany                                                    |
| Kraft, Werner        | Research Assistant and Group Leader for Thermal Energy Storages        | German Aero Space Center                                                                     | Germany                                                    |
| KRAINOVIC, PEDRO     | researcher - Tropical Forest Sciences                                  | Deutsche Gesellschaft für Internationale Zusammenarbeit (GIZ) GmbH                           | Brazil                                                     |
| Krakowski, Vincent   | Grid and PV project manager                                            | HESPUL                                                                                       | France                                                     |
| Kral, Petr           | Professor                                                              | University of Illinois at Chicago                                                            | United States of America (the)                             |
| Kramar, Hans         | Senior Scientist in Spatial Planning and Regional Science              | Vienna University of Technology                                                              | Austria                                                    |
| Kramarz, Paulina     | associate professor, biology                                           | Jagiellonian University                                                                      | Poland                                                     |
| Kramer, Jos          | Evolutionary Biologist                                                 | University of Zurich                                                                         | Switzerland                                                |
| Kramer, Gary         | President, Enlight42 / Health Physics                                  | Enlight42                                                                                    | Canada                                                     |

|                            |                                                          |                                                                                                |                                                            |
|----------------------------|----------------------------------------------------------|------------------------------------------------------------------------------------------------|------------------------------------------------------------|
| Krämer, Dirk               | Dr. rer. nat. in Physics                                 | Schloss Hagerhof                                                                               | Germany                                                    |
| Kramer, PhD, John H.       | Principal Groundwater Geologist                          | Privately Owned Corporation                                                                    | United States of America (the)                             |
| Kranas, Hanna              | PhD student in Bioinformatics                            | Institute for Research in Biomedicine (IRB Barcelona)                                          | Spain                                                      |
| Krantz, David              | Doctoral Researcher                                      | Arizona State University                                                                       | United States of America (the)                             |
| Krappmann, Oliver          | director / geologist                                     | Gecko Namibia                                                                                  | Namibia                                                    |
| Krasnow, Kevin             | Research and graduate faculty                            | Teton Science Schools                                                                          | United States of America (the)                             |
| Krath Christensen, Søren   | Master Student in Biology                                | Copenhagen University                                                                          | Denmark                                                    |
| Kratina, Pavel             | Lecturer in Aquatic Ecology                              | Queen Mary University of London                                                                | United Kingdom of Great Britain and Northern Ireland (the) |
| Krattenmacher, Jochen      | PhD Student, Physical Chemistry                          | BIOCEV                                                                                         | Czech Republic (the)                                       |
| Kräuchi, Norbert           | Division Leader Landscape & Waters                       | Department of Environment Canton Aargau                                                        | Switzerland                                                |
| Kraus, Andrea              | Biologist                                                | University of South Bohemia                                                                    | Czech Republic (the)                                       |
| Kraus, Brian               | Graduate Research Assistant in Plasma Physics            | Princeton University                                                                           | United States of America (the)                             |
| Kraus, Robert              | PI                                                       | University of Konstanz & Max Planck Institute for Animal Behavior                              | Germany                                                    |
| Kraus, Fred                | Research Biologist                                       | University of Michigan                                                                         | United States of America (the)                             |
| Krause, Fayette            | WA Land Steward (ret.)                                   | The Nature Conservancy                                                                         | United States of America (the)                             |
| Krause, Bernie             | Soundscape Ecologist                                     | Wild Sanctuary                                                                                 | United States of America (the)                             |
| Krause, Alexandra          | Physicist                                                | Freie Universität Berlin                                                                       | Germany                                                    |
| Krausmann, Elisabeth       | Principal Scientist                                      | European Commission Joint Research Centre                                                      | Italy                                                      |
| Krauss, Jochen             | Professor of Ecology                                     | University of Würzburg, Department of Animal Ecology and Tropical Biology                      | Germany                                                    |
| Kraut, Ann                 | Junior Researcher, Forest Ecology                        | University of Tartu                                                                            | Estonia                                                    |
| Krautzberger, Maria        | President                                                | German Environmental Agency - UBA                                                              | Germany                                                    |
| Krawczyk, Wojciech         | PhD Environment                                          | National Research Institute of Animal Production                                               | Poland                                                     |
| Krebs, Katherine           | Communications Specialist                                | UCSF                                                                                           | United States of America (the)                             |
| Krebs, Isabel              | Postdoctoral Researcher (Theoretical Plasma Physics)     | DIFFER                                                                                         | Netherlands (the)                                          |
| Kreft, Holger              | Professor of Biodiversity, Macroecology and Biogeography | University of Göttingen                                                                        | Germany                                                    |
| Kreft, Peter               | Meteorologist                                            | Meteorological Service of New Zealand Limited                                                  | New Zealand                                                |
| Kreft, Stefan              | Academic lecturer and researcher in nature conservation  | Centre for Ecomics and Ecosystem Management, Eberswalde University for Sustainable Development | Germany                                                    |
| Kreiling, Agnes-Katharina  | PhD student; Freshwater ecology                          | University of Iceland and Hólar University                                                     | Iceland                                                    |
| KREITER, Serge             | Distinguished Professor                                  | Montpellier SupAgro                                                                            | France                                                     |
| Krell, Julian              | PhD Candidate                                            | Ruhr-Universität Bochum                                                                        | Germany                                                    |
| Kremer, Natacha            | researcher / evolutionary biology                        | CNRS/UCBL                                                                                      | France                                                     |
| Kreß, Aljoscha             | Post Doc, Biology                                        | Goethe University Frankfurt                                                                    | Germany                                                    |
| Krettek, Agnes             | Research assistant, soil chemistry                       | Soil science and land evaluation                                                               | Germany                                                    |
| Kreyling, Juergen          | Professor of Plant Ecology                               | University of Greifswald                                                                       | Germany                                                    |
| Krisai-Greilhuber, Irmgard | Ao.-Univ.-Prof. / Mycology, Botany                       | Department of Botany and Biodiversity Research, University of Vienna                           | Austria                                                    |
| Krishna, Sampath           | CTO                                                      | Asthma & Allergy Specialists, PC                                                               | United States of America (the)                             |

|                             |                                                                     |                                                                              |                                                            |
|-----------------------------|---------------------------------------------------------------------|------------------------------------------------------------------------------|------------------------------------------------------------|
| Kriska, Nadine              | Instructional Academic Staff-Biology                                | UW-Whitewater                                                                | United States of America (the)                             |
| Kristensen, Torsten Nygaard | Professor, Evolutionary Biology                                     | Aalborg University                                                           | Denmark                                                    |
| Krofel, Miha                | Assistant Professor of Ecology                                      | University of Ljubljana, Biotechnical Faculty, Dept. for Forestry            | Slovenia                                                   |
| Kröger, Kerstin             | MPA Management Adviser / Marine Ecology                             | Joint Nature Conservation Committee                                          | United Kingdom of Great Britain and Northern Ireland (the) |
| Kröger, Markus              | Associate Professor of development studies                          | University of Helsinki                                                       | Finland                                                    |
| Krogmeier, Katie            | Master's Student of Biology                                         | Appalachian State University                                                 | United States of America (the)                             |
| Krogseth, Ingjerd Sunde     | Senior Scientist Environmental Chemistry                            | NILU - Norwegian Institute for Air Research                                  | Norway                                                     |
| Krohmer, Julia              | Scientific Coordination and Transfer                                | Senckenberg Gesellschaft für Naturforschung                                  | Germany                                                    |
| Krohn, Johannes             | Environmental consultant for lake restoration                       | KLS-Gewaesserschutz                                                          | Germany                                                    |
| Krolewski, Ralph            | MD, Academic Teaching Practice Family Medicine                      | University of Cologne                                                        | Germany                                                    |
| Kroll, Alexandra            |                                                                     | Oekotoxzentrum                                                               | Switzerland                                                |
| Krolow, Tiago               | Professor/Zoology and biogeography                                  | Universidade Federal do Tocantins                                            | Brazil                                                     |
| Krook-Riekkola, Anna        | Assistant professor in energy transition and energy system analysis | Luleå University of Technology                                               | Sweden                                                     |
| Krsinic, Frano              | Prof.dr.sc.                                                         | Institute of Oceanography and Fisheries, Split                               | Croatia                                                    |
| Krug, Cornelia              | Science Policy Liaison                                              | University of Zurich                                                         | Switzerland                                                |
| Krug, Jean                  | Dr                                                                  | IFSTTAR                                                                      | France                                                     |
| Kruitwagen, Astrid          | Evolutionary biologist                                              | University of Groningen                                                      | Netherlands (the)                                          |
| Krukonis, Greg              | Assistant Professor - Biology                                       | Angelo State University                                                      | United States of America (the)                             |
| Krull, Alex                 | Geologist                                                           | Parks Canada                                                                 | Canada                                                     |
| Krupovic, Mart              | Associate Professor (Microbiology/Virology)                         | Institut Pasteur                                                             | France                                                     |
| Kruse, Jakob                | PhD student in AI research                                          | Heidelberg University                                                        | Germany                                                    |
| Krushelnysky, Paul          | Ecologist                                                           | University of Hawaii                                                         | United States of America (the)                             |
| Krut, Louis                 | Medicine                                                            | St. Louis University Retired                                                 | United States of America (the)                             |
| Krutein, Michelle           | Graduate Student in the Department of Pathology                     | University of Washington                                                     | United States of America (the)                             |
| Kruuk, Loeske               | Professor                                                           | Australian National University                                               | Australia                                                  |
| Kryazhimskiy, Sergey        | Assistant Professor in Ecology, Behavior and Evolution              | University of California, San Diego                                          | United States of America (the)                             |
| Krysko, Kenneth             | Science Instructor                                                  | IB school                                                                    | United States of America (the)                             |
| KRZISCH, Marine             | post-doctoral researcher                                            |                                                                              | United States of America (the)                             |
| ksentini, ines              | Biological control/ plant protection                                | Tunisian Olive Institute                                                     | Tunisia                                                    |
| Kubkowski, Piotr            | assistant professor, cultural studies                               | Institute of Polish Culture, University of Warsaw                            | Poland                                                     |
| Küblbeck, Martin            | PhD student, behavioral and population ecology                      | Max-Planck-Institute for Ornithology                                         | Germany                                                    |
| Kübler, Janet               | Senior Research Scientist / Marine Biology                          | California State University at Northridge                                    | United States of America (the)                             |
| Kuc, Michal                 | PhD on earth sciences, geologist, geoarchaeologist                  | Freelance                                                                    | Poland                                                     |
| Kuchenreuther, Margaret     | Associate Professor of Biology                                      | University of Minnesota Morris                                               | United States of America (the)                             |
| Kücklich, Marlen            | PhD Candidate in Behavioural Ecology                                | University of Leipzig and Max-Planck Institute for Evolutionary Anthropology | Germany                                                    |
| Kuczyński, Lechosław        | Associate Professor in Ecology                                      | Adam Mickiewicz University in Poznań                                         | Poland                                                     |
| Kudryashov, Alexei          | PhD Candidate in Mathematics                                        | University of Augsburg                                                       | Germany                                                    |

|                            |                                                                                   |                                                                               |                                                            |
|----------------------------|-----------------------------------------------------------------------------------|-------------------------------------------------------------------------------|------------------------------------------------------------|
| Kuehnhammer, Kathrin       | PHD student, Ecohydrology                                                         | TU Braunschweig                                                               | Germany                                                    |
| Kueltz, Dietmar            | Professor of Physiological Genomics                                               | University of California, Davis                                               | United States of America (the)                             |
| Kugler, Günter Anton       | Physics                                                                           |                                                                               | Germany                                                    |
| Kuhfuß, Hanna              | Researcher & Project Manager                                                      | Making Oceans Plastic Free e.V.                                               | Germany                                                    |
| Kühl, Susanne              | Biologist / PhD                                                                   | Ulm University                                                                | Germany                                                    |
| Kühl, Michael              | Professor of Biochemistry                                                         | Ulm University                                                                | Germany                                                    |
| Kuhlemann, Ilyas           | PhD Student, Scientific and Teaching Assistant, Biophysics                        | Institute of Physical Chemistry, Georg-August-University Göttingen            | Germany                                                    |
| Kühn, Ingolf               | Professor for Macroecology                                                        | Helmholtz Centre for Environmental Research - UFZ                             | Germany                                                    |
| Kühn, Peter                | Soil Sciences and Physical Geography                                              | eberhard Karls University of Tübingen                                         | Germany                                                    |
| Kuijk, Loes                | Science teacher                                                                   | Hogeschool Leiden                                                             | Netherlands (the)                                          |
| Kuijper, Dries             | Associate professor, Ecology                                                      | Mammal Research Institute, Polish Academy of Sciences                         | Poland                                                     |
| Kuiken, Thijs              | Professor in Comparative Pathology                                                | Erasmus University Medical Centre , Rotterdam                                 | Netherlands (the)                                          |
| Kujawa, Krzysztof          | Dr., Assoc. Professor, acting deputy director for research; ecology & agriculture | Institute for Agricultural and Forest Environment, Polish Academy of Sciences | Poland                                                     |
| Kulczak, Richard P.        | Lecturer, architectural technology and sustainability                             | University of Brighton                                                        | United Kingdom of Great Britain and Northern Ireland (the) |
| Kulikauskas, Andrius Jonas | Philosopher and Mathematician                                                     |                                                                               | Lithuania                                                  |
| Külköylüoğlu, Okan         | Academics/Hydrobiology                                                            | Bolu Abant İzzet Baysal University                                            | Turkey                                                     |
| Kullberg, Alyssa           | PhD Student                                                                       | University of Miami                                                           | United States of America (the)                             |
| Kumar, Janesh              | Scientist                                                                         | National Centre for Cell Science, Pune                                        | India                                                      |
| Kumar, Arkadeep            | ITRI-Rosenfeld postdoc/ Mechanical engineering and Environment Science            | Berkeley Lab                                                                  | United States of America (the)                             |
| Kümmel, Stephan            | Professor of Physics                                                              |                                                                               | Germany                                                    |
| Kun, Marcelo               | PHD in Biology                                                                    | Universidad Nacional del Comahue                                              | Argentina                                                  |
| Kundel, Dominika           | PhD Student Soil Sciences                                                         |                                                                               | Switzerland                                                |
| Kundrát, Martin            | Research Team Leader / Evolutionary Biodiversity                                  | Pavol Jozef Šafárik University in Košice                                      | Slovakia                                                   |
| Kunkel, Andreas            | Biology                                                                           | Museum für Naturkunde Berlin                                                  | Germany                                                    |
| Kunz, Gernot               | Lecturer                                                                          | Karl Franzen University of Graz                                               | Austria                                                    |
| Kunz, Natalie              | Lecturer and scientist                                                            | University of Kaiserslautern                                                  | Germany                                                    |
| Kunzmann, Andreas          | Ecophysiology WG                                                                  | ZMT Leibniz Centre for Tropical Marine Research, Bremen                       | Germany                                                    |
| Kupai, David               | biologist/ ecologist                                                              | Universitiy of Debrecen                                                       | Hungary                                                    |
| Kuper, Clara               | PhD Cognitive Neuroscience                                                        | Humboldt University Berlin                                                    | Germany                                                    |
| Kuppel, Sylvain            | Postdoc                                                                           | CNRS/IPGP & Irstea                                                            | France                                                     |
| Kupsch, Denis              | Conservation Biology                                                              | Georg-August-Universität Göttingen                                            | Germany                                                    |
| Kupsjak, Jelena            | Teaching assitant, phd student, Anthropology                                      | University of Zadar, Department of Ethnology and Anthropology                 | Croatia                                                    |
| Kuralt, Žan                | researcher                                                                        | Biotechnical Faculty, University of Ljubljana                                 | Slovenia                                                   |
| Kurnaz, Levent             | Prof.                                                                             | Bogazici University Center for Climate Change and Policy Studies              | Turkey                                                     |

|                           |                                                                                           |                                                                          |                                                            |
|---------------------------|-------------------------------------------------------------------------------------------|--------------------------------------------------------------------------|------------------------------------------------------------|
| Kürster, Martin           | Astrophysicist                                                                            | Max Planck Institute for Astronomy                                       | Germany                                                    |
| Kurt, Güley               | Assoc. Prof. Dr / Marine Biology                                                          |                                                                          | Turkey                                                     |
| Kurz, Karl H.             | Gynecologist, Research in Reproductive Health, LARC, Long Acting Reversible Contraception | IRIR, International Research Institute of Reproduction                   | Germany                                                    |
| Kurze, Christoph          | Postdoc/Biology                                                                           | MLU Halle                                                                | Germany                                                    |
| Kusmanoff, Alex           | Research Fellow, ICON Science                                                             | RMIT University                                                          | Australia                                                  |
| Kutal, Miroslav           | researcher                                                                                | Department of Forest Ecology, Mendel University in Brno                  | Czech Republic (the)                                       |
| Kuzilmbila Yongo, Joachim | Searcher/ Fish farming/ Integrated systems Aquaculture - Agronomy                         | INERA                                                                    | Congo (the Democratic Republic of the)                     |
| Kuzniar, Arnold           | eScience Research Engineer                                                                | Netherlands eScience Center                                              | Netherlands (the)                                          |
| KUZNIK, Frédéric          | Professor, Director of CETHIL laboratory                                                  | INSA LYON                                                                | France                                                     |
| Kuzu, Istemi              | Academic / Chemistry                                                                      | Philipps-Universität Marburg, Fachbereich Chemie                         | Germany                                                    |
| Kvarnström, Marie         | senior programme officer                                                                  | Swedish Biodiversity Centre, Swedish University of Agricultural Sciences | Sweden                                                     |
| Kwasniewski, Slawomir     | Marine Biologist                                                                          | Institute of Oceanology Polish Academy of Sciences                       | Poland                                                     |
| Kwon, Ohkyung             | Postdoctoral Researcher in Physics                                                        | University of Chicago                                                    | United States of America (the)                             |
| Kylin, Henrik             | Full Professor                                                                            | Linköping University, Dept. Environmental Change                         | Sweden                                                     |
| Kythreotis, Andrew        | Senior Lecturer in Political and Social Geography                                         | University of Lincoln                                                    | United Kingdom of Great Britain and Northern Ireland (the) |
| La Manna, Gabriella       | Marine Ecology                                                                            | MARETERRA ONLUS                                                          | Italy                                                      |
| La Puma MD, John          | Founder, AGreenRx.com; Founder, ChefMD                                                    | Chef Clinic                                                              | United States of America (the)                             |
| Laanisto, Lauri           | Senior researcher in macroecology                                                         | Estonian University of Life Sciences                                     | Estonia                                                    |
| Labasque, Thierry         | Research Engineer                                                                         | CNRS                                                                     | France                                                     |
| Labaude, Sophie           | PhD, Research Engineer in ecology and evolution                                           | Ecole Normale Supérieure de Paris                                        | France                                                     |
| Labbe, Aurelie            | Adjunct                                                                                   | Murdoch University                                                       | Australia                                                  |
| LaBella, Abigail Leavitt  | Postdoctoral Scholar                                                                      | Vanderbilt University                                                    | United States of America (the)                             |
| Labiak, Paulo             | Professor                                                                                 | Universidade Federal do Parana                                           | Brazil                                                     |
| LaBrie, Richard           | PhD candidate in biological oceanography                                                  | Université de Montréal                                                   | Canada                                                     |
| Labrousse, Sara           | Postdoctoral Associate                                                                    | Woods Hole Oceanographic Institution                                     | United States of America (the)                             |
| Labrut, Sophie            | Veterinary pathologist                                                                    | Laboce                                                                   | France                                                     |
| Laca, Emilio              | Professor in Quantitative Rangeland Ecology                                               | University of California, Davis                                          | United States of America (the)                             |
| Lacava, Mariangeles       | Biologist                                                                                 | Universidad de la República                                              | Uruguay                                                    |
| LACHAAL, Fethi            | Dr                                                                                        | Water Researches and Technologies Centre                                 | Tunisia                                                    |
| Lachapelle, Paul          | Professor                                                                                 | Montana State University                                                 | United States of America (the)                             |
| LACHAUD, Jean-Paul        | Research Associate - Conservation of Biodiversity                                         |                                                                          | Mexico                                                     |
| Lachenaud, Olivier        | Researcher, Botany                                                                        | Meise Botanic Garden                                                     | Belgium                                                    |
| Lachenbruch, Barbara      | Professor Emeritus                                                                        | Oregon State University                                                  | United States of America (the)                             |
| Lachmuth, Susanne         | Habilitation candidate, Plant evolutionary ecology                                        | Martin Luther University Halle Wittenberg                                | Germany                                                    |
| Lachs, Liam               | ONE Planet Doctoral Candidate, School of Natural and Environmental Sciences               | Newcastle University                                                     | United Kingdom of Great Britain and Northern Ireland (the) |
| Lacoeuilhe, Aurelie       | Ecology                                                                                   | Muséum national d'Histoire naturelle                                     | France                                                     |

|                            |                                                            |                                                                                               |                                                            |
|----------------------------|------------------------------------------------------------|-----------------------------------------------------------------------------------------------|------------------------------------------------------------|
| LACOMBE, Catherine         |                                                            | Observatoire de Paris                                                                         | France                                                     |
| Lacoste, Marine            | Researcher in soil science                                 | INRA                                                                                          | France                                                     |
| Lacoue-Labarthe, Thomas    | Ecotoxicology                                              | CNRS / LIENSs Institute France                                                                | France                                                     |
| Lacroix, Vincent           | Associate professor in bioinformatics                      | Université Lyon 1                                                                             | France                                                     |
| Ladin, Emily               | graduate student                                           | California State University Northridge                                                        | United States of America (the)                             |
| Ladio, Ana                 | Researcher in Ethnobiology                                 | INIBIOMA                                                                                      | Argentina                                                  |
| Ladrón de Guevara, Mónica  | Ecology                                                    | Ecological and Forestry Applications Research Centre                                          | Spain                                                      |
| LaDue, Chase               | PhD Candidate, Environmental Science and Policy            | George Mason University                                                                       | United States of America (the)                             |
| LaDuke, Thomas             | Associate Professor of Biological Sciences                 | East Stroudsburg University                                                                   | United States of America (the)                             |
| Ladyman, PhD, Juanita      | Botanist and Ecologist                                     | JnJ Associates LLC                                                                            | United States of America (the)                             |
| Laeseke, Philipp           | PhD Student                                                | University of Bremen                                                                          | Germany                                                    |
| Laetz, Elise               | Research Scientist                                         | Rijksuniversiteit Groningen                                                                   | Netherlands (the)                                          |
| Lafage, Denis              | Postdoc in Ecology                                         | University of Rennes 1                                                                        | France                                                     |
| Lafayette, Lev             | Information Systems                                        | University of Melbourne                                                                       | Australia                                                  |
| Lafolie, Francois          | Chargé de Recherches                                       | INRA                                                                                          | France                                                     |
| Lafrenière, David          | Professor of physics                                       | University of Montreal                                                                        | Canada                                                     |
| Lagace, Melia              | MSc Geography PhD candidate in Biology                     | UQAM                                                                                          | Canada                                                     |
| Lagache, Guilaine          | Professor - Astronomy                                      | Aix Marseille University                                                                      | France                                                     |
| Lagerwall, Gareth          | University Lecturer / Researcher, Bioresources Engineering | University of KwaZulu-Natal                                                                   | South Africa                                               |
| Lagesse, Juliette          | Wetland Ecologist                                          |                                                                                               | South Africa                                               |
| LAGET, Guillaume           | PhD, Mathematics                                           | Université Grenoble Alpes                                                                     | France                                                     |
| Laglbauer, Betty           | Phd candidate                                              | University of the Azores                                                                      | Portugal                                                   |
| Lagnado, Leon              | Professor of Neuroscience                                  | University of Sussex                                                                          | United Kingdom of Great Britain and Northern Ireland (the) |
| Lagroteria, Diogo          | Researcher                                                 | Instituto Chico Mendes de Conservação da Biodiversidade                                       | Brazil                                                     |
| Lague, Dimitri             | Senior Researcher, Earth Sciences                          | CNRS-Geosciences Rennes                                                                       | France                                                     |
| Lagüela, Susana            | Head of the Catedra Iberdrola VIII Centenario              | University of Salamanca                                                                       | Spain                                                      |
| Laguionie Marchais, Claire | Researcher in marine biology                               | National University of Ireland, Galway                                                        | Ireland                                                    |
| Laguna, Eduardo            | Phd Student                                                | Institute for Game and Wildlife Research                                                      | Spain                                                      |
| Laguna, Emilio             | Head of Section for Wild Plant Conservation                | Generalitat Valenciana - Centre for Forestry Research and Experimentation                     | Spain                                                      |
| Lahoda, Marek              | PhD student, Climatology                                   | Masaryk University & Global Change Research Institute (CzechGlobe), Czech Academy of Sciences | Czech Republic (the)                                       |
| Lahr, Michael              | Professor                                                  | Rutgers, The State University of New Jersey                                                   | United States of America (the)                             |
| LaHue, Nathaniel           | Public Health                                              | Wisconsin DHS                                                                                 | United States of America (the)                             |
| Lai, Hsin-Chih             | Chair                                                      | Department of green energy and environmental resources/ Chang Jung Christian University       | Taiwan                                                     |
| Laibach, Natalie           | PostDoc Sustainable Tech & Innovation Management           | University of Bonn                                                                            | Germany                                                    |
| Laignel, Benoit            | Professor of the University                                | University of Rouen Normandie                                                                 | France                                                     |
| Laine, Matias              | Academy Research Fellow, Accounting                        | Tampere University                                                                            | Finland                                                    |

|                          |                                                                     |                                                                        |                                                            |
|--------------------------|---------------------------------------------------------------------|------------------------------------------------------------------------|------------------------------------------------------------|
| Laine, Veronika          | Postdoctoral researcher                                             | Netherlands Institute of Ecology (NIOO-KNAW)                           | Netherlands (the)                                          |
| Laing, Ingrid            | Senior Research Fellow, Paediatric Respiratory Medicine             | Telethon Kids Institute, The University of Western Australia           | Australia                                                  |
| Laird, David             | Professor Emeritus                                                  | Iowa State University                                                  | United States of America (the)                             |
| Lairet, Rafael           | Profesor                                                            | Universidad Simón Bolívar                                              | Venezuela (Bolivarian Republic of)                         |
| LAITUNG, Beryl           | Associate Professor / Plant Ecology                                 | University of Burgundy                                                 | France                                                     |
| Lajbner, Zdeněk          | Postdoctoral Researcher                                             | Institute of Animal Physiology and Genetics, Czech Academy of Sciences | Czech Republic (the)                                       |
| LAJTHA, KATE             | Professor, Biogeochemistry                                          | Oregon State University                                                | United States of America (the)                             |
| Lakhdar-Ghazal, Nouria   | Neuroscience                                                        | Mohammed V University                                                  | Morocco                                                    |
| Lakhtakia, Akhlesh       | Evan Pugh University Professor of Engineering Science and Mechanics | Pennsylvania State University                                          | United States of America (the)                             |
| Lalechère, Etienne       | Postdoctoral researcher in ecology                                  | IRSTEA                                                                 | France                                                     |
| Laloë, Francis           | Statistician                                                        | IRD (retired)                                                          | France                                                     |
| Lamanna, Christine       | Climate Change Scientist                                            | World Agroforestry                                                     | Kenya                                                      |
| Lamarque, Laurent J.     | Postdoctoral fellow                                                 | INRA                                                                   | France                                                     |
| Lamarre, Jean-Michel     | Directeur de Recherche Emerite, Astrophysics                        | Observatoire de Paris, Paris                                           | France                                                     |
| Lamas Herrera, Iker      | PhD student                                                         | UNIL                                                                   | Switzerland                                                |
| Lambers, Hans            | Professor of Plant Ecology and Biology                              | University of Western Australia and China Agricultural University      | Australia                                                  |
| Lambert, Joanna          | Professor of Environmental Studies                                  | University of Colorado Boulder                                         | United States of America (the)                             |
| Lambert, Amaury          | Professor of Mathematics                                            | Sorbonne Université                                                    | France                                                     |
| Lambert, Nicholas        | Physics                                                             | University of Otago                                                    | New Zealand                                                |
| Lambert, Erwin           | Postdoc climate physics                                             | Utrecht University                                                     | Netherlands (the)                                          |
| Lameira, Adriano         | Assistant Professor                                                 | University of Warwick                                                  | United Kingdom of Great Britain and Northern Ireland (the) |
| Lamentowicz, Mariusz     | Professor of Geography                                              | Adam Mickiewicz University in Poznań                                   | Poland                                                     |
| Lamers, Carolien         | Consultant Clinical Psychologist                                    | Bangor University                                                      | United Kingdom of Great Britain and Northern Ireland (the) |
| Lamichhane, Gyanu        | Biomedical Research                                                 | Johns Hopkins University                                               | United States of America (the)                             |
| Lamine, Brahim           | Associate professor                                                 | University Paul Sabatier                                               | France                                                     |
| Laming, Sven             | Researcher                                                          | University of Aveiro                                                   | Portugal                                                   |
| Lamoree, Niek            | PhD Student Mathematics                                             | Vrije Universiteit Amsterdam                                           | Netherlands (the)                                          |
| Lampe, Leonie            | Cognitive Science                                                   | Macquarie University                                                   | Australia                                                  |
| Lamy, Laurent            | Astronomer                                                          | Observatoire de Paris                                                  | France                                                     |
| Lancien, Cécilia         | Researcher in Mathematics                                           | Institut de Mathématiques de Toulouse & CNRS                           | France                                                     |
| Lanctot, Richard         | Wildlife Biologist                                                  |                                                                        | United States of America (the)                             |
| Lande, Russell           | Professor of Biology, Emeritus                                      | University of California, San Diego                                    | United States of America (the)                             |
| Landeira-Dabarca, Andrea |                                                                     | South Bohemia University                                               | Czech Republic (the)                                       |
| Landeiro, Victor         | Professor / Ecology                                                 | Universidade Federal de Mato Grosso                                    | Brazil                                                     |
| Landires, Erick          | Medical Critical Care                                               | Instituto de Ciencias Medicas                                          | Panama                                                     |
| Landires, Iván           | MD, PhD                                                             | Instituto de Ciencias Médicas                                          | Panama                                                     |

|                               |                                                                |                                                        |                                                            |
|-------------------------------|----------------------------------------------------------------|--------------------------------------------------------|------------------------------------------------------------|
| Landivar Albis, Carlos Miguel | Ph.D. Researcher                                               | Universitat Freiburg                                  | Germany                                                    |
| Landmann, Johannes            | PhD student                                                    | ETH Zurich                                             | Switzerland                                                |
| Landsbergen, Kim              | Associate Professor of Biology and Environmental Science       | Antioch College                                        | United States of America (the)                             |
| Landsberger, Mariann          | Molecular Cell Biology                                         | University College Dublin                              | United Kingdom of Great Britain and Northern Ireland (the) |
| Landuyt, Lisa                 | PhD candidate                                                  | Ghent University                                       | Belgium                                                    |
| Lane, Peter                   | Statistical Consultant                                         | Australian National University                         | United Kingdom of Great Britain and Northern Ireland (the) |
| Lane, Guy                     | BSc (Hons) Environmental Science                               | Griffith University                                    | Australia                                                  |
| Lane, Peter                   | Physicist                                                      | Illinois Institute of Technology                       | United States of America (the)                             |
| Lane, David                   | Professor of Business Informatics                              | Henley Business School, University of Reading          | United Kingdom of Great Britain and Northern Ireland (the) |
| Lang, Birgit                  | Postdoc                                                        | Senckenberg Museum of Natural History, Gorlitz        | Germany                                                    |
| Lang, Thierry                 | Professor in Public Health                                     | Toulouse University                                    | France                                                     |
| Lang, Judith                  | Scientific Coordinator                                         | Atlantic and Gulf Rapid Reef Assessment (AGRRA)        | United States of America (the)                             |
| Lang, Patricia                | Postdoc, Biology                                               | Stanford                                               | United States of America (the)                             |
| LANG, Michel                  | Hydrologist                                                    | IRSTEA                                                 | France                                                     |
| Lange, Jens                   | Professor of Hydrology                                         | University of Freiburg                                 | Germany                                                    |
| Lange, Ines                   | Postdoctoral Research Fellow, coral reef ecology/geomorphology | University of Exeter                                   | United Kingdom of Great Britain and Northern Ireland (the) |
| Langenberg, Julius            | Materials Engineering                                          | RWTH Aachen University                                 | Germany                                                    |
| Langendijk-Genevaux, Petra    | Bioinformatician, scientific engineer, Microbiology            | CNRS - University of Toulouse                          | France                                                     |
| Langenfeld, Kathryn           | Doctoral Student, Environmental Engineering                    | University of Michigan                                 | United States of America (the)                             |
| Langer, Martin                | Professor of Paleontology                                      | Institut fur Geowissenschaften, University of Bonn    | Germany                                                    |
| Langhammer, Maria             | Scientist                                                      | Helmholtz Centre for Environmental Research GmbH - UFZ | Germany                                                    |
| Langhans, Simone Daniela      | Marie Curie Fellow                                             | University of Otago                                    | New Zealand                                                |
| Langhans, Kelley              | Biology PhD Student                                            | Stanford University                                    | United States of America (the)                             |
| Langley, Liam                 | PhD Student - Seabird Ecology                                  | University of Exeter                                   | United Kingdom of Great Britain and Northern Ireland (the) |
| Langley, Chris                | Freelance science consultant                                   | Leverhulme Trust                                       | United Kingdom of Great Britain and Northern Ireland (the) |
| Langlois, Olivier             | Researcher / archaeology                                       | CNRS                                                   | France                                                     |
| Langridge, Holly              | Ecologist                                                      | University of Manchester                               | United Kingdom of Great Britain and Northern Ireland (the) |
| Lanigan, Liam                 | Research Assistant, Palaeoproteomics                           | The Globe Institute, University of Copenhagen          | Denmark                                                    |
| Lanna, Flavia                 | Ph.D. student                                                  | The Ohio State University                              | United States of America (the)                             |
| Lanna, Emilio                 | Professor                                                      | Universidade Federal da Bahia                          | Brazil                                                     |
| LANNA, ANDRE                  | Ecology                                                        | UF RJ                                                  | Brazil                                                     |
| Lanooij, Suzanne              | PhD student Neurobiology                                       | University of Groningen                                | Netherlands (the)                                          |

|                          |                                                                           |                                                                                      |                                                            |
|--------------------------|---------------------------------------------------------------------------|--------------------------------------------------------------------------------------|------------------------------------------------------------|
| Lansdown, Richard        | Chair, IUCN SSC Freshwater Plant Specialist Group                         |                                                                                      | United Kingdom of Great Britain and Northern Ireland (the) |
| Lansø, Anne Sofie        | Researcher, Land surface modelling                                        | LSCE (IPSL)                                                                          | France                                                     |
| Lanza, Guy               | Research Professor                                                        | SUNY ESF                                                                             | United States of America (the)                             |
| Lanzi Aló, Lia           | Estatística                                                               |                                                                                      | Brazil                                                     |
| Lanzoni-Mangutchi, Paola | PhD student                                                               | Newcastle University                                                                 | United Kingdom of Great Britain and Northern Ireland (the) |
| Lapanja, Tjasa           | Predoctoral fellow                                                        | EMBL                                                                                 | Italy                                                      |
| Laparie, Mathieu         | Research Scientist, Biology/Ecology                                       | INRA                                                                                 | France                                                     |
| Lapeyra Martin, Jon      | PhD Student in Oceanography                                               | Université Libre de Bruxelles                                                        | Belgium                                                    |
| Lapiidus, Nathanael      | Assistant Professor, Statistics / Epidemiology                            | Sorbonne Université / Inserm                                                         | France                                                     |
| Laplaze, Laurent         | Directeur de Recherche, Plant Biology                                     | IRD                                                                                  | France                                                     |
| Lapo, Karl               | Postdoctoral Researcher                                                   | University of Bayreuth                                                               | Germany                                                    |
| lapostolle, dany         | Assistant professor                                                       | Université de Bourgogne Franche-Comté                                                | France                                                     |
| Lappan, Susan            | Associate Professor                                                       | Appalachian State University                                                         | United States of America (the)                             |
| Lara, Paloma             | Postdoctoral researcher                                                   | Instituto de Biotecnología, UNAM                                                     | Mexico                                                     |
| Lara Romero, Carlos      | Postdoctoral researcher                                                   | Universidad Rey Juan Carlos                                                          | Spain                                                      |
| Lares, Marcelo           | Professor and researcher                                                  | CONICET - Universidad Nacional de Córdoba                                            | Argentina                                                  |
| Large, Mark              | Assoc Professor                                                           | School of Animal and Environmental Science, Unitec, Auckland                         | New Zealand                                                |
| Larivera, Simone         | PhD Student                                                               | University of Regensburg                                                             | Germany                                                    |
| Lark, Murray             | Professor of Environmetrics                                               | University of Nottingham                                                             | United Kingdom of Great Britain and Northern Ireland (the) |
| Larkin, Kate             | Deputy Head EMODnet Secretariat, Marine Science                           | European Marine Observation and Data Network Secretariat, Seascope Belgium bvba      | Belgium                                                    |
| Laroche, Jean            | Professor                                                                 | European Institute for Marine Studies                                                | France                                                     |
| Larouche, Richard        | Assistant Professor, Public Health                                        | University of Lethbridge                                                             | Canada                                                     |
| Larrabee, David          | Professor Emeritus of Physics                                             | East Stroudsburg University                                                          | United States of America (the)                             |
| Larraín-Barrios, Bárbara | PhD (c) / Ecology                                                         | Universidad Nacional Autónoma de México                                              | Mexico                                                     |
| Larrat, Sylvain          | Wildlife veterinarian                                                     | Independent consultant                                                               | France                                                     |
| Larrea-Alcázar, Daniel   | Associate Researcher                                                      | Herbario Nacional de Bolivia, Instituto de Ecología, Universidad Mayor de San Andres | Bolivia (Plurinational State of)                           |
| Larridon, Isabel         | Researcher                                                                | Royal Botanic Gardens, Kew                                                           | United Kingdom of Great Britain and Northern Ireland (the) |
| Larrinaga, Asier R.      | Postdoc Researcher and Environmental Consultant, Ecology and Conservation | CSIC and eNeBaDa                                                                     | Spain                                                      |
| LARRONDO, SUSANA         | CHEMICAL ENGINEERING PhD                                                  | SCIENTIFIC AND TECNOLÓGICAL RESEARCH COUNCIL-CONICET                                 | Argentina                                                  |
| Larson, Anne M           | Principal Scientist and Team Leader, Equity, Gender, Justice and Tenure   | Center for International Forestry Research (CIFOR)                                   | Peru                                                       |
| Larsson, Johan           | PhD student in Physical Resource Theory                                   | Chalmers University of Technology                                                    | Sweden                                                     |
| Larter, Steve            | Professor of Geochemistry                                                 | University of Calgary                                                                | Canada                                                     |

|                                |                                                              |                                                                                  |                                |
|--------------------------------|--------------------------------------------------------------|----------------------------------------------------------------------------------|--------------------------------|
| Larue, Fanny                   | Post-doctoral researcher - Cryosphere                        | Institute of Environmental Geosciences                                           | France                         |
| LaRue, Michelle                | Lecturer                                                     | University of Canterbury                                                         | New Zealand                    |
| Laskar, Amzad Hussain          | Postdoctoral Fellow                                          | Utrecht University                                                               | Netherlands (the)              |
| Lasker, Howard                 | Professor of Environment and Sustainability                  | University at Buffalo                                                            | United States of America (the) |
| Laskowski, Ryszard             | Professor in biology/ecology                                 | Jagiellonian University in Kraków                                                | Poland                         |
| LASOU, Gauthier                | Decommissioning Engineer                                     | CEA                                                                              | France                         |
| Lasry Benchimol Reis, Luciana  | Scientific Researcher                                        | Agronomic Institute of Campinas                                                  | Brazil                         |
| Lassaletta, Luis               | Researcher / Sustainable agriculture                         | Universidad Politécnica de Madrid                                                | Spain                          |
| Lasser, Jana                   | PostDoc in Physics                                           | Max Planck Institute for Dynamics and Self-Organization                          | Germany                        |
| LASSOIS, Ludivine              | Dr. Plant biology and pathology                              | Liège University, Gembloux Agro-Bio tech                                         | Belgium                        |
| Lasue, Jeremie                 | Astronomer                                                   | University of Toulouse                                                           | France                         |
| Lasuik, Jordan                 | Physics                                                      | University of Manitoba                                                           | Canada                         |
| László, Zoltán                 | Assistant professor                                          | Babes-Bolyai University                                                          | Romania                        |
| Latalowa, Malgorzata           | Professor/Earth Sciences, Biology                            | University of Gdansk                                                             | Poland                         |
| Latham, Roger                  | Ecologist / Conservation Biologist                           | continentalconservation.us                                                       | United States of America (the) |
| Latimer, Andrew                | Professor, Ecology/Plant Sciences                            | UC Davis                                                                         | United States of America (the) |
| Latinne, Alice                 | Research Scientist                                           | EcoHealth Alliance                                                               | United States of America (the) |
| Latorre, Claudio               | Professor                                                    | Pontificia Universidad Catolica de Chile                                         | Chile                          |
| Latouche, Morwena              | Assistant professor                                          |                                                                                  | France                         |
| LATOUCHE, Gwendal              | Biophysicist                                                 | Universite Paris-Sud                                                             | France                         |
| Lattorff, Michael              | Senior Scientist                                             | International Centre of Insect Physiology and Ecology (icipe)                    | Kenya                          |
| Lattorff, Michael              | Senior Scientist                                             | International Centre of Insect Physiology and Ecology                            | Kenya                          |
| Latz, Ellen                    | Post Doctoral Researcher                                     |                                                                                  | Germany                        |
| Latzel, Vít                    | senior researcher                                            | Institute of Botany of the Czech Academy of Sciences                             | Czech Republic (the)           |
| Laubichler, Manfred            | Complex Systems and Theoretical Biology                      | Arizona State University                                                         | United States of America (the) |
| Lauda-Rodriguez, Zenaida Luisa | PhD on Environmental Science                                 | University of São Paulo                                                          | Brazil                         |
| Laudet, Vincent                | Professor, Director of the Marine Station of Banyuls-sur-Mer | Sorbonne Universite                                                              | France                         |
| Laufer, Juliana                | Pos-doc                                                      | Michigan State University                                                        | Brazil                         |
| Laugen, Ane Timenes            | Professor of Marine Ecology                                  | Centre for Coastal Research, Department of Natural Sciences, University of Agder | Norway                         |
| Laukkanen, Sonja               | anthropology                                                 | Helsinki University                                                              | Finland                        |
| Laumann, Raúl                  | Researcher - Entomology                                      | Embrapa                                                                          | Brazil                         |
| Laumonier, Yves                | Associate Professor                                          | CIFOR                                                                            | Indonesia                      |
| Laundre, John                  | Assistant professor                                          | Western Oregon University                                                        | United States of America (the) |
| Launhardt, Ralf                | Astrophysicist                                               | Max Planck Institute for Astronomy                                               | Germany                        |
| Lauper, Bruno                  | Geologist                                                    | University of Fribourg                                                           | Switzerland                    |
| Lauper, Benedikt               | PhD Environmental Sciences                                   | Eawag Dübendorf                                                                  | Switzerland                    |
| Laura, Guerrero-Meseguer       | Postdoctoral researcher                                      | University of Porto                                                              | Portugal                       |

|                          |                                                                  |                                                                                      |                                |
|--------------------------|------------------------------------------------------------------|--------------------------------------------------------------------------------------|--------------------------------|
| Laurance, William        | Distinguished Professor                                          | James Cook University                                                                | Australia                      |
| Laureillard, Didier      | Medical Doctor                                                   |                                                                                      | France                         |
| Laurent, Julien          | Associate Professor                                              | Ecole Nationale du Génie de l'Eau et de l'Environnement de Strasbourg                | France                         |
| LAURENT, Yann            | Technician in ecological research                                | AGROCAMPUS OUEST                                                                     | France                         |
| LAURENT, Benoit          | Postdoc, forest pathology                                        | INRA                                                                                 | France                         |
| Laurila, Anssi           | Professor, Animal ecology                                        | Uppsala University                                                                   | Sweden                         |
| Laurindo da Silva, Fabio | Postdoctoral Fellow                                              | University of São Paulo                                                              | Brazil                         |
| Lauriola, Paolo          | Associate                                                        | Italian National Research Council                                                    | Italy                          |
| Lautensach, Alexander    | Assoc. Professor, Education                                      | University of Northern British Columbia                                              | Canada                         |
| Lauvernet, Claire        | Researcher                                                       | IRSTEA                                                                               | France                         |
| Lauzeral, Christine      | Ecology                                                          | Université Paul Sabatier Toulouse                                                    | France                         |
| Lauzier, Benjamin        | associate professor                                              | Nantes university                                                                    | France                         |
| LaVal, Richard           | Founder and Owner                                                | The Bat Jungle                                                                       | Costa Rica                     |
| Laval Najid, sonia       | teacher / physics                                                | lycée Blaise pascal                                                                  | France                         |
| Lavanchy, Guillaume      | PhD Student, Evolutionary Biology                                | University of Lausanne                                                               | Switzerland                    |
| Lavanchy, Anne           | Professor Anthropology and social work                           | University of applied sciences and arts western Switzerland                          | Switzerland                    |
| Lavaniegos, Bertha E.    | Researcher/Biological Oceanography                               | Centro de Investigación Científica y Educación Superior de Ensenada, Baja California | Mexico                         |
| laversenne, laetitia     | Researcher                                                       | CNRS - French National Center for Scientific Research                                | France                         |
| Lavoie, Isabelle         | Professor                                                        | INRS-ETE                                                                             | Canada                         |
| Lavoie, Janie            | Master degree in renewable resources                             | UQAC                                                                                 | Canada                         |
| Lavoie, Amy              | Biologie                                                         | Université du Québec à Chicoutimi                                                    | Canada                         |
| Lavorel, Sabine          | Assistant Professor in International Public Law                  | University Grenoble Alpes                                                            | France                         |
| Lavrov, Dennis           | Associate Professor                                              | Iowa State University                                                                | United States of America (the) |
| Law, Mikki               | MSc Ecology and Evolution                                        | University Bern                                                                      | Switzerland                    |
| Law, Beverly             | Professor of Global Change Biology & Terrestrial Systems Science | Oregon State University                                                              | United States of America (the) |
| Lawley, Jonathan         | PhD Candidate                                                    | Griffith University                                                                  | Australia                      |
| Lawrence, Cloverley      | Marine Scientist                                                 | National Parks                                                                       | South Africa                   |
| Lawrence, Deborah        | Professor of Environmental Sciences                              | University of Virginia                                                               | United States of America (the) |
| Lawrence, Mark           | Scientific Director                                              | Institute for Advanced Sustainability Studies e.V., Potsdam                          | Germany                        |
| Lawson, Caitlin          | PhD Candidate                                                    | Climate Change Cluster, University of Technology Sydney                              | Australia                      |
| Lawson, Sarah            | Assistant Professor                                              | Quinnipiac University                                                                | United States of America (the) |
| Lawson, Dawn M.          | Adjunct Faculty - Biology Department                             | San Diego State University                                                           | United States of America (the) |
| Lawson, Jennifer         | Executive Director                                               | Waikoloa Dry Forest Initiative                                                       | United States of America (the) |
| Lax, Judi                | Ph.D. student in Earth Sciences                                  | Tel Aviv University                                                                  | Israel                         |
| Layet, Jean-Marc         | Professor in Physics                                             | Aix-Marseille University                                                             | France                         |
| Layton, Katharine        | Urban Forester                                                   | Fairfax County Government                                                            | United States of America (the) |

|                            |                                                        |                                                            |                                |
|----------------------------|--------------------------------------------------------|------------------------------------------------------------|--------------------------------|
| Lazo, Patricio X.          | PhD candidate                                          | Universidad de Cuenca                                      | Ecuador                        |
| Le Blond, Marie            | Research Associate                                     | Plant and Food research                                    | New Zealand                    |
| LE BOHEC, Céline           | Researcher in Ecology & Evolution                      | CNRS ( France ) & Centre Scientifique de Monaco ( Monaco ) | France                         |
| Le Boulengé, Éric          | Professor emeritus                                     | Université catholique de Louvain                           | Belgium                        |
| Le Bras, Zoé               | PhD                                                    | ETH                                                        | Switzerland                    |
| Le Breton, Tom             | PhD Candidate                                          | University of New South Wales                              | Australia                      |
| Le Brigant, Alice          | Applied Mathematics                                    |                                                            | France                         |
| Le Bris, Nadine            | Professor Marine Ecology                               | Sorbonne University                                        | France                         |
| Le Chevalier, Hugo         | Research Engineer                                      | CNRS                                                       | France                         |
| le Coarer, Etienne         | Research engineer                                      | Université Grenoble-Alpes                                  | France                         |
| Le Coeur, Didier           | Associate Professeur in Ecology                        | Agrocampus Ouest                                           | France                         |
| Le Conte, Yves             | Senior Scientist                                       |                                                            | France                         |
| Le Corre, Valérie          | Researcher, Plant Ecology                              | INRA                                                       | France                         |
| Le Cozannet, Goneri        | Coastal impacts                                        |                                                            | France                         |
| Le Gall, Philomène         | PhD Student                                            | Université Grebogle Alpes                                  | France                         |
| Le Galliard, Jean-François | Ecology                                                | Centre national de la recherche scientifique               | France                         |
| Le Lann, Cécile            | Associate professor in Ecology                         | University of Rennes 1                                     | France                         |
| Le Luyer, Diane            | PhD Geography                                          | Université de Rouen - CNRS UMR 6266 IDEES                  | France                         |
| Le Magueresse, Corentin    | Research Scientist, Neurobiology                       | INSERM                                                     | France                         |
| Le Maitre, David           | Principal Researcher - Hydrological Ecosystem Services | Bidiversity & Ecosytem Services, Smart Places, CSIR        | South Africa                   |
| Le Meur, Hervé             | Applied mathematics                                    | CNRS                                                       | France                         |
| Le Moan, Alan              | PhD in evolutionary biology                            | University of Gothenburg                                   | France                         |
| Le mouélic, Stéphane       | Research engineer                                      | Cnrs                                                       | France                         |
| Le Noac'h, Philippe        | PhD student in limnology                               | UQAM                                                       | Canada                         |
| Le pape, Olivier           | Professor in marine ecology                            | Agrocampus ouest                                           | France                         |
| Le Roux, Christine         | Microbiology                                           | CIRAD                                                      | France                         |
| Le Roux, Gael              | directeur de recherche - Isotope Biogeochemistry       | CNRS Université de Toulouse                                | France                         |
| Le Roux, Vincent           | Lecturer                                               | EDYSAN, UMR CNRS 7058, UPJV                                | France                         |
| LE ROUX, Christophe        | Searcher/Chemistry                                     |                                                            | France                         |
| Le Roy, Benjamin           | PhD student in Urban Climatology                       | Centre National de Recherches Météorologiques              | France                         |
| Le Sommer, Julien          | Research Scientist / Physical Oceanography             | CNRS                                                       | France                         |
| Le Tacon, François         |                                                        | INRA Institut National de la Recherche Agronomique         | France                         |
| Le Tiec, Alexandre         | Astrophysicist                                         | Paris Observatory                                          | France                         |
| Le Vaillant, Justine       | PhD student                                            | EBD-CSIC                                                   | Spain                          |
| Le Viol, Isabelle          | Researcher - Conservation biologist                    | Museum national d'Histoire naturelle                       | France                         |
| Lea, Susan                 | Professor of Physics and Astronomy                     | San Francisco State University                             | United States of America (the) |
| leal, Cecília              | Postdoctoral researcher                                | University of São Paulo                                    | Brazil                         |
| Leal, Camille V.           | Post-Doc in Genetics                                   | Universidade Federal do Rio de Janeiro                     | Brazil                         |
| Leal, Inara                | Associate Professor                                    | Universidade Federal de Pernambuco                         | Brazil                         |

|                        |                                                                     |                                                                            |                                                            |
|------------------------|---------------------------------------------------------------------|----------------------------------------------------------------------------|------------------------------------------------------------|
| Leal, M Sheila         | postdoctoral researcher                                             | Complutense University of Madrid                                           | Spain                                                      |
| Leal, Camille Victória | Researcher                                                          | Universidade Federal do Rio de Janeiro                                     | Brazil                                                     |
| Leal Meca, María       |                                                                     | CEDEX                                                                      | Spain                                                      |
| Lebel, Thierry         | Hydro-climatologist                                                 | IGE - IRD                                                                  | France                                                     |
| Leberger, Roxanne      | Dr                                                                  |                                                                            | France                                                     |
| leblanc, karine        | Oceanographer                                                       | CNRS                                                                       | France                                                     |
| Leblans, Paul          | Innovation Manager                                                  | Agfa NV                                                                    | Belgium                                                    |
| Leblois, Arthur        | Researcher, Neuroscience                                            | CNRS / University of Bordeaux                                              | France                                                     |
| Leblois, Raphaël       | Researcher, ecology and evolution                                   | French national institute for agronomical and environmental research INRAE | France                                                     |
| Leboulleux, Lucie      | Astronomy                                                           | Observatoire de Paris-Meudon                                               | France                                                     |
| Lebouvier, Marion      | PhD fellow, marine biology                                          |                                                                            | France                                                     |
| Lebreton, Sebastien    | PhD Biology                                                         | CNRS                                                                       | France                                                     |
| Lebugle, Maxime        | Optical scientist                                                   | Paul Scherrer Institute                                                    | Switzerland                                                |
| Lecharlier, Aurore     | PhD in analytical environmental chemistry                           | IPREM - UPPA                                                               | France                                                     |
| Lecina-Diaz, Judit     | predoctoral researcher                                              | CREAF                                                                      | Spain                                                      |
| Leclaire, Sarah        | Researcher in Evolutionary Biology                                  | CNRS - Toulouse                                                            | France                                                     |
| Leclerc, Camille       | PhD student in ecology                                              |                                                                            | France                                                     |
| Leclercq, Samuel       | Physicist in Radioastronomy                                         | IRAM                                                                       | France                                                     |
| Lecocq, Thomas         | Associate professor (senior lecturer) in animal biology and ecology |                                                                            | France                                                     |
| Lecomte, Jane          | Professor of Ecology                                                | University Paris-Sud Paris-Saclay                                          | France                                                     |
| Lecomte, claude        | professor                                                           | universite de lorraine                                                     | France                                                     |
| Leconte, Jeremy        | Astrohysicist                                                       | CNRS                                                                       | France                                                     |
| Lecorps, Benjamin      | PhD position Applied Biology                                        | UNiversity of British Columbia                                             | Canada                                                     |
| Lecours, Vincent       | Assistant Professor of Marine Remote Sensing and Spatial Analysis   | University of Florida                                                      | United States of America (the)                             |
| Leder, Stephanie       | Researcher, Development Studies/ Geography                          | Swedish University of Agricultural Sciences                                | Germany                                                    |
| Ledermann, Florian     | Researcher                                                          | Technische Universität Wien                                                | Austria                                                    |
| Ledesma, José L. J.    | Postdoctoral Researcher - Catchment biogeochemistry                 | Spanish National Research Council                                          | Spain                                                      |
| LEDESMA VAZQUEZ, JORGE | EMERITUS PROFESSOR GEOLOGY                                          | UABC                                                                       | Mexico                                                     |
| Ledoux, Jean-Baptiste  | Associate Researcher                                                | CIIMAR                                                                     | Portugal                                                   |
| Lee, Terrie            | Adjunct Faculty; Research Hydrologist US Geological Survey, Retired | St Petersburg College                                                      | United States of America (the)                             |
| Lee, Phyllis           |                                                                     | University of Stirling                                                     | United Kingdom of Great Britain and Northern Ireland (the) |
| Lee, Ee Ling           | Environmental Policy and governance                                 |                                                                            | Malaysia                                                   |
| Lee, William           | Conservation ecologist                                              | Manaaki Whenua Landcare Research                                           | New Zealand                                                |
| Lee, Kirsty            |                                                                     | University of Greenwich                                                    | United Kingdom of Great Britain and Northern Ireland (the) |
| Lee, Brian C.          | Toxicologist                                                        | Good Afternoon Toxicology Consulting, LLC                                  | United States of America (the)                             |
| Lee, Junbeom           | Ph.D                                                                | Johannes Gutenberg-University Mainz                                        | Germany                                                    |

|                           |                                                             |                                                           |                                                            |
|---------------------------|-------------------------------------------------------------|-----------------------------------------------------------|------------------------------------------------------------|
| Lee, Matthew              | Associate Professor Marine Ecology                          | Centro i mar, Universidad de Los Lagos                    | Chile                                                      |
| Lee, Alan                 | Editor: Ostrich Journal of African Ornithology              | Cape Town University; University of KwaZulu Natal         | South Africa                                               |
| Lee, Jiwoo                | Scientist / Atmospheric Science                             | Lawrence Livermore National Laboratory                    | United States of America (the)                             |
| LEE, CHAN WON             | EMERITUS PROFESSOR                                          | KYUNGNAM UNIVERSITY                                       | Korea (the Republic of)                                    |
| Lee-Cruz, Larisa          | Ecology                                                     |                                                           | Mexico                                                     |
| Leer, Jaak                | Professor                                                   | Tallinna Kodukirurgia Eraülikool                          | Estonia                                                    |
| Lefebvre, Wouter          | Researcher on air pollution                                 | VITO                                                      | Belgium                                                    |
| Lefevre, Jeanne           | PhD student, signal processing                              | Gipsa-Lab                                                 | France                                                     |
| Lefèvre, Julien           | Associate Prof in Computer Science                          | Aix-Marseille Université                                  | France                                                     |
| Lefèvre, Sophie           | Ecology                                                     |                                                           | France                                                     |
| Legendre, Louis           | Professor Emeritus                                          | Sorbonne University                                       | France                                                     |
| Legendre, Frédéric        | Associate Professor - Evolutionary Biology                  | Museum national d'Histoire naturelle, Paris               | France                                                     |
| Leger, Adrien             | Postdoc in Bioinformatics                                   | EMBL-EBI                                                  | United Kingdom of Great Britain and Northern Ireland (the) |
| Leger, Elsa               | Postdoctoral researcher / Ecology and Evolution             | Royal Veterinary College                                  | United Kingdom of Great Britain and Northern Ireland (the) |
| Léger, Théo               | Scientific Head of the Lepidoptera Collection               | Museum fuer Naturkunde                                    | Germany                                                    |
| Leglise, Joris            | Engineer in atmospheric science                             |                                                           | France                                                     |
| LEGRAND, PIERRE           | Biologist                                                   | Synchrotron-SOLEIL                                        | France                                                     |
| Lehar, Mark               | Professional Geoscientist; Certified Professional Geologist | Bifrost Environmental and Remediation Services Inc.       | Canada                                                     |
| Lehikoinen, Petteri       | PhD candidate in Ecology and Evolutionary Biology           | Finnish Museum of Natural History, Univeristy of Helsinki | Finland                                                    |
| Lehikoinen, Aleksi        | Academy Research Fellow                                     | Finnish Museum of Natural History                         | Finland                                                    |
| Lehmann, Julia            | Reader in Life Sciences                                     | University of Roehampton                                  | United Kingdom of Great Britain and Northern Ireland (the) |
| Lehmann, Katja            | Microbial Ecologist                                         | UK Centre for Ecology and Hydrology                       | United Kingdom of Great Britain and Northern Ireland (the) |
| Lehmkuhl, Dr. med. Dieter | retired psychiatrist                                        | German health and climate Alliance (KLUG)                 | Germany                                                    |
| Leid, Jeff                | Ph.D. Biotechnology/Medical Devices                         |                                                           | United States of America (the)                             |
| Leidenberger, Sonja       | Associate Senior Lecturer in Bioscience                     | School of Bioscience, University of Skövde                | Sweden                                                     |
| Leigh, Mary Beth          | Professor of Microbiology                                   | University of Alaska Fairbanks                            | United States of America (the)                             |
| Leinfelder, Reinhold      | Full Professor, Geology, Geobiology, Anthropocene Studies   | Freie Universität Berlin, Dept. Geologicaal Sciences      | Germany                                                    |
| Leinss, Silvan            | Scientist                                                   | ETH Zürich                                                | Switzerland                                                |
| Leip, Adrian              | Food Systems                                                | European Commission - Joint Research Centre               | Italy                                                      |
| Leis, Jeffrey             | Adjunct Professor, Marine Biologist                         | University of Tasmania                                    | Australia                                                  |
| Leite, Yuri               | Professor                                                   | Universidade Federal do Espirito Santo                    | Brazil                                                     |
| Leite, Renata             | Reseach Associate                                           | Duke University                                           | United States of America (the)                             |
| Leith, Mandy              | Science communications                                      | Ocean Networks Canada                                     | Canada                                                     |
| Lejeune, Benjamin         | Scientific collaborator (PhD)                               | University of Liège                                       | Belgium                                                    |
| Lejeusne, Christophe      | Associate Professor                                         | Aix-Marseille University                                  | France                                                     |

|                        |                                                            |                                                                                  |                                                            |
|------------------------|------------------------------------------------------------|----------------------------------------------------------------------------------|------------------------------------------------------------|
| Lejman, Mariusz        | Postdoc researcher/Physics                                 | Commissariat à l'énergie atomique et aux énergies alternatives (CEA)             | France                                                     |
| Leles, Suzana          | PhD Student                                                | Swansea University                                                               | Brazil                                                     |
| Lellei-Kovács, Eszter  | research fellow/ecology and geo-informatician              | MTA Centre for Ecological Research                                               | Hungary                                                    |
| Lemaux, Peggy G.       | Faulty, Plant and Microbial Biology                        | University of California, Berkeley                                               | United States of America (the)                             |
| Lemay, Audrey          | Postdoctoral researcher in forest ecology                  | Université du Québec à Chicoutimi                                                | Canada                                                     |
| Lemes, Maristerra      | Permanent Researcher                                       | Instituto Nacional de Pesquisas da Amazonia (INPA)                               | Brazil                                                     |
| Lemes Martins, Rodrigo | Professor                                                  | Instituto de Biodiversidade e Sustentabilidade                                   | Brazil                                                     |
| Lemieux, Chris         | Associate Professor                                        | Wilfrid Laurier University                                                       | Canada                                                     |
| Lemieux, Julie         | Biologiste                                                 |                                                                                  | Canada                                                     |
| Lemmen, Carsten        | Marine ecology                                             | Helmholtz-Zentrum Geesthacht                                                     | Germany                                                    |
| Lemmens, Christian     | Graduate student Astronomy & Astrophysics                  | University of Amsterdam                                                          | Netherlands (the)                                          |
| Lemoine, Anthony       | PhD candidate in Hydroclimatology                          | Irstea                                                                           | France                                                     |
| Lemon, Hannah          | Laboratory Manager                                         | Edinburgh University                                                             | United Kingdom of Great Britain and Northern Ireland (the) |
| LEMONNIER, Gildas      | Field Engineer                                             | CNRS                                                                             | France                                                     |
| LEMOS, LISLEY          | Researcher                                                 | INSTITUTO DE DESENVOLVIMENTO SUSTENTÁVEL MAMIRAUÁ                                | Brazil                                                     |
| LENA, Philippe         | Emeritus Researcher, geographer                            | IRD/National Museum of Natural History                                           | France                                                     |
| Lenfant, Philippe      | Professor - Marine Fish Ecology                            | University of Perpignan                                                          | France                                                     |
| Lenferink, Wouter      | PhD Candidate                                              | Radboud University                                                               | Netherlands (the)                                          |
| Lengyel, Attila        | senior lecturer in sustainability and tourism              | University of Debrecen                                                           | Hungary                                                    |
| Lenihan, James         | Research Vegetation Ecologist                              | USDA Forest Service (Retired)                                                    | United States of America (the)                             |
| Lennard, Patrick       | Graduate Student, Infectious Diseases and One Health       | University of Edinburgh                                                          | Australia                                                  |
| Lenoir, Jonathan       | Researcher in Ecology                                      | CNRS based at Université de Picardie Jules Verne                                 | France                                                     |
| Lenzen, Manfred        | School of Physics                                          | The University of Sydney                                                         | Australia                                                  |
| Lenzner, Bernd         | Post-doctoral researcher                                   | University of Vienna                                                             | Austria                                                    |
| Léo, Michel            | PhD student                                                | Sorbonnes Université                                                             | France                                                     |
| León, Lorenzo          | Tenured Scientist / Olive Breeding                         | Andalusian Institute of Agricultural and Fisheries Research and Training (IFAPA) | Spain                                                      |
| Leonard, Jennifer      | biologist                                                  | Estación Biológica de Doñana, CSIC                                               | Spain                                                      |
| Leonhardt, Sara        | Group leader                                               | University of Würzburg                                                           | Germany                                                    |
| Leote, Catarina        | Former Oceanography Scientist/present Science Communicator |                                                                                  | Portugal                                                   |
| Lepczyk, Christopher   | Professor                                                  | Auburn University                                                                | United States of America (the)                             |
| Lepenmetier, Gildas    | Bioinformatics                                             | TUM                                                                              | Germany                                                    |
| Lerman, Cécile         | Researcher in Medical Imaging                              | CEA                                                                              | France                                                     |
| Leroy, Valeriane       | Research director                                          | Inserm                                                                           | France                                                     |
| Leroy, Céline          | Researcher                                                 | IRD                                                                              | France                                                     |
| Leroy, Boris           | Lecturer                                                   | Muséum National d'Histoire Naturelle                                             | France                                                     |
| Leroy, Thibault        | Postdoctoral researcher - Evolutionary biology             | ISEM, Univ. Montpellier                                                          | France                                                     |

|                          |                                                    |                                                                    |                                                            |
|--------------------------|----------------------------------------------------|--------------------------------------------------------------------|------------------------------------------------------------|
| Lertzman, Ken            | Professor of Resource and Environmental Management | Simon Fraser University                                            | Canada                                                     |
| Lesage, Philippe         | Assistant profesor, Earth Science                  | Université Savoie Mont Blanc                                       | France                                                     |
| Leslie, Sarah            | Astronomy                                          | Max Planck Institute for Astronomy                                 | Germany                                                    |
| Lestak, Leanne           | Professional Scientist II                          | University of Colorado, Institute for Arctic and Alpine Research   | United States of America (the)                             |
| Lester, Jack             | PhD Candidate                                      | Max Planck Institute for Evolutionary Anthropology                 | Germany                                                    |
| Lester, Andy             | Head of UK Conservation                            | A Rocha UK                                                         | United Kingdom of Great Britain and Northern Ireland (the) |
| Lesur, Maxime            | Associate Professor of Physics                     | Lorraine University                                                | France                                                     |
| Letaief, Sarah           | Master student                                     | Institut des Sciences de le la mer de Rimouski                     | Canada                                                     |
| Letardi, Agostino        | Senior researcher                                  | ENEA                                                               | Italy                                                      |
| Letelier, Ricardo        | Professor of Oceanography                          | Oregon State University                                            | United States of America (the)                             |
| Letschert, Jonas         | PhD Student                                        | Thuenen Institute for Sea Fisheries                                | Germany                                                    |
| Leu, Eva                 | Senior Scientist, Marine Biology                   | Akvaplan-niva                                                      | Norway                                                     |
| Leube, Bettina           | Medicine                                           |                                                                    | Germany                                                    |
| Leuch, Corina            | Geography (Bsc)                                    | University of Zuricha                                              | Switzerland                                                |
| Leurs, Guido             | PhD. candidate - Marine Conservation Ecology       | University of Groningen                                            | Netherlands (the)                                          |
| Leutenegger, Anne-Louise | Researcher in human genetics                       | Inserm                                                             | France                                                     |
| Leuthold, Luc Alexis     | Chemist                                            |                                                                    | France                                                     |
| Leuzinger, Sebastian     | Associate Professor                                | Auckland University of Technology                                  | New Zealand                                                |
| Levade, Inès             | PhD candidate in Biology                           | Université de Montreal                                             | Canada                                                     |
| Leventhal, Sarah         | PhD student in paleontology                        | University of Colorado                                             | United States of America (the)                             |
| Leveque, Lucile          | PhD candidate/Conservation ecology                 | University of Tasmania                                             | Australia                                                  |
| Leverkus, Alexandro B    | Researcher, Ecology and Forestry                   | University of Granada                                              | Spain                                                      |
| Levers, Christian        | Postdoctoral Research Fellow                       | Helmholtz Centre for Environmental Research - UFZ                  | Germany                                                    |
| Levi, Dr. Adi            | Enviromental sciences                              | Achva academic college                                             | Israel                                                     |
| Levi, Taal               | Associate Professor Fisheries and Wildlife         | Oregon State University                                            | United States of America (the)                             |
| Levikov, Nika            | EU Project Officer                                 | University of Malta                                                | Malta                                                      |
| Levin, Maureece          | Archaeology                                        | Stanford University                                                | United States of America (the)                             |
| Levis, Carolina          | Postdoc in the Graduate Program in Ecology         | Universidade Federal de Santa Catarina                             | Brazil                                                     |
| Levy, David              | President                                          | Levy Research Services Ltd.                                        | Canada                                                     |
| Levy-Marchal, Claire     | MC, scientist, clinical research                   | INSERM                                                             | France                                                     |
| Lewandowski, Jörg        | Senior Scientist, Ecohydrology                     | Leibniz Institute of Freshwater Ecology and Inland Fisheries (IGB) | Germany                                                    |
| Lewczuk, Nuria           | Researcher / Biologist                             | INTA                                                               | Argentina                                                  |
| Lewinsohn, Thomas        | Professor of Ecology                               | University of Campinas (UNICAMP)                                   | Brazil                                                     |
| Lewis, Charlotte         | MSc Marine Biologist                               |                                                                    | United Kingdom of Great Britain and Northern Ireland (the) |
| Lewis, Patrick           | Herbarium Curator/ Botanist                        | UWI Herbarium, Mona, University of the West Indies, Mona.          | Jamaica                                                    |

|                                      |                                                                                        |                                                                      |                                                            |
|--------------------------------------|----------------------------------------------------------------------------------------|----------------------------------------------------------------------|------------------------------------------------------------|
| Lewis, Rick                          | Professor of Structural Biology                                                        | Newcastle University                                                 | United Kingdom of Great Britain and Northern Ireland (the) |
| Lewis, Ryan                          | Marine Ecologist                                                                       | Institute of Marine and Antarctic Studies                            | Australia                                                  |
| Lewis, Ladonna                       | Professor                                                                              | Glendale Community College, AZ                                       | United States of America (the)                             |
| Lewison, Rebecca                     | Professor of Ecology                                                                   | San Diego State University                                           | United States of America (the)                             |
| Leyshon, Catherine                   | Associate Professor of Geography                                                       | University of Exeter                                                 | United Kingdom of Great Britain and Northern Ireland (the) |
| Leyvraz Waltz, Francois              | Full Professor                                                                         | Institute of Physical Sciences—Autonomous University of Mexico       | Mexico                                                     |
| Lhano, Marcos                        | Associate Professor                                                                    | Universidade Federal do Reconcavo da Bahia (UFRB)                    | Brazil                                                     |
| Lhosmot, Alexandre                   | Doctorant                                                                              | Chrono-Environnement                                                 | France                                                     |
| Li, Jiahang                          | Doctor                                                                                 | Peking University                                                    | China                                                      |
| Li, Roman                            | Postdoc/ Toxicology                                                                    | EAWAG                                                                | Switzerland                                                |
| Liamou, Evdokia                      | Psychologist                                                                           | Aristotelian University of Thessaloniki                              | Greece                                                     |
| Lianos, Theodore P.                  | Professor of Political Economy                                                         | Athens University of Economics and Business                          | Greece                                                     |
| Libbrecht, Romain                    | Assistant Professor                                                                    | Johannes Gutenberg University of Mainz                               | Germany                                                    |
| liberman, ronon                      | phd student                                                                            | school of zoology, faculty of life sciences at Tel Aviv university   | Israel                                                     |
| Libertelli, Marcela                  | Scientific researcher and head of the Department of Biology of Antarctic Top Predators | Argentinian Antarctic Institute                                      | Argentina                                                  |
| Libois, Roland                       | Prof. Zoology                                                                          | University Liège                                                     | Belgium                                                    |
| Libralato, Noemi                     | Ecologist                                                                              |                                                                      | Italy                                                      |
| Libralato, Simone                    | Scientist, Marine ecology                                                              | Istituto Nazionale di Oceanografia e di Geofisica Sperimentale - OGS | Italy                                                      |
| Lidborg, Linda                       | PhD student                                                                            | Durham University                                                    | United Kingdom of Great Britain and Northern Ireland (the) |
| Liddle, David                        | Ecology                                                                                | Charles Darwin University                                            | Australia                                                  |
| Liddle, Andrew                       | Researcher                                                                             | Perimeter Institute for theoretical Physics                          | Canada                                                     |
| Lidicker, Jr., William Z.            | Professor Emeritus, Department of Integrative Biology                                  | University of California, Berkeley                                   | United States of America (the)                             |
| Liébana, Raquel                      | PhD                                                                                    | Chalmers University of Technology                                    | Sweden                                                     |
| Lieberman, Susan                     | Vice President, International Policy                                                   | Wildlife Conservation Society                                        | United States of America (the)                             |
| Liede-Schumann, Sigrid               | Full professor, Botany                                                                 | University of Bayreuth                                               | Germany                                                    |
| Liedtke, Hans Christoph              | Postdoctoral Researcher                                                                | Biological Station Doñana                                            | Spain                                                      |
| Liefwalker, Daniel                   | Research Assistant Professor                                                           | Oregon Health and Science University                                 | United States of America (the)                             |
| LIEGEOIS, Maud                       | Agronomist / PhD student in Ecology and Evolution                                      | University of Lausanne                                               | Switzerland                                                |
| Liesaputra, Veronica                 | Lecturer in Computer Science                                                           | University of Otago                                                  | New Zealand                                                |
| Liesenfeld, Marcus Vinicius Athaydes | Professor                                                                              | Universidade Federal do Acre                                         | Brazil                                                     |
| Lieskovský, Juraj                    | Landscape Ecology                                                                      | Institute of Landscape Ecology, Slovak Academy of Sciences           | Slovakia                                                   |
| Light, Ann                           | Cultural Transformation to address climate change                                      | University of Sussex/Malmo University                                | United Kingdom of Great Britain and Northern Ireland (the) |

|                             |                                                          |                                                    |                                |
|-----------------------------|----------------------------------------------------------|----------------------------------------------------|--------------------------------|
| Ligmann-Zielinska, Arika    | Associate Professor, Geography                           | Michigan State University                          | United States of America (the) |
| Likens, Gene E.             | Founding Director and President Emeritus                 | Cary Institute of Ecosystem Studies                | United States of America (the) |
| Lilensten, Jean             | Research director                                        | CNRS - IPAG                                        | France                         |
| Liles, Michael              | Conservation Scientist                                   | Asociación ProCosta                                | El Salvador                    |
| Liliane, Meignen            | Directrice recherches émérite                            | CNRS                                               | France                         |
| Lill, Ross                  | Plant scientist                                          | NZ Institute of Plant and Food Research            | New Zealand                    |
| Lillethorup, Thea           | Postdoc, Department of Clinical Medicine                 | Aarhus University                                  | Denmark                        |
| Lillo Box, Jorge            | ESO Fellowship                                           | European Southern Observatory (ESO)                | Spain                          |
| Lilly, Jonathan             | Physical Oceanographer                                   | Theiss Research                                    | United States of America (the) |
| Lillywhite, Harvey          | Professor of Biology                                     | University of Florida                              | United States of America (the) |
| Lily Arison, Rene de Roland | Biologiste                                               | The Peregrine Fund                                 | Madagascar                     |
| Lim, Jun Ying               | Postdoctoral Researcher                                  | University of Amsterdam                            | Netherlands (the)              |
| Lim, Francis                | Senior and Lead Scientist for Discovery                  | Entopsis                                           | United States of America (the) |
| Lim, Joeline                | M.Sc Biology                                             | Queen's University                                 | Canada                         |
| Lima, Elson                 | Project Manager                                          | Casa da Floresta                                   | Brazil                         |
| Lima, Ana Luiza             | Biology student                                          | Rio de Janeiro's Federal University (UFRJ)         | Brazil                         |
| Lima, Jacqueline            | Post doctoral / molecular ecology                        | UFRGS                                              | Brazil                         |
| Lima, Alice                 | PhD in Biology                                           |                                                    | France                         |
| Lima, Fernando P.           | Researcher                                               | CIBIO/InBIO, University of Porto                   | Portugal                       |
| Limbach, Friederich         | PhD. Physics                                             |                                                    | United States of America (the) |
| Limburg, Karin              | Professor, Fisheries and Ecosystem Sciences              | SUNY College of Environmental Science and Forestry | United States of America (the) |
| Limier, Frantz              | Botanist (PhD)                                           |                                                    | France                         |
| Limón-Morales, Ofelia       | Dr.                                                      | Universidad Autónoma Metropolitana                 | Mexico                         |
| Lin, Mu-Xing                | Law Fellow                                               | RSPRC - National Taiwan University                 | Taiwan                         |
| Lin, Mu-Xing                | Predoc Fellow of Tech Laws                               | RSPRC, National Taiwan University                  | Taiwan                         |
| Linard, Morgane             | MD in public health, PhD student in epidemiology         | INSERM Bordeaux                                    | France                         |
| Linares, Cristina           | Associate professor                                      | University of Barcelona                            | Spain                          |
| Linares-Palomino, Reynaldo  | Ecologist                                                | Smithsonian Conservation Biology Institute         | Peru                           |
| Lincoln, Johnny             | CEO                                                      | Axiom Materials, Inc                               | United States of America (the) |
| Lincoln, James              | Professor of Physics                                     | AAPT                                               | United States of America (the) |
| Lind, Johan                 | Associate professor                                      | Stockholm University                               | Sweden                         |
| Lind, Ole Christian         | CERAD CoE Research Director, Environmental Radioactivity | Norwegian University of Life Sciences              | Norway                         |
| Lindén, Leena               | University Lecturer                                      | University of Helsinki                             | Finland                        |
| Lindenbaum, Pierre          | Bioinformatics                                           | INSERM                                             | France                         |
| Lindenberg, Katrin          | molecular biologist, neurologist                         | Ulm University                                     | Germany                        |
| Linder, Hans Peter          | Professor                                                | University of Zurich                               | Switzerland                    |
| Lindeza, Ana                | PhD student                                              | Institute for Evolution and Biodiversity           | Germany                        |
| Lindner, Andre              | Biologist/Ecologist, postgraduate course coordinator     | TU Dresden, CIPSEM                                 | Germany                        |
| Lindroth, Richard           | Vilas & Sorenson Distinguished Achievement Professor     | University of Wisconsin-Madison                    | United States of America (the) |

|                              |                                                             |                                                                                                                            |                                                            |
|------------------------------|-------------------------------------------------------------|----------------------------------------------------------------------------------------------------------------------------|------------------------------------------------------------|
| Lindsey, Kieran              | Wildlife Biology                                            | Virginia Tech                                                                                                              | United States of America (the)                             |
| Lindström, Kristina          | Professor                                                   | University of Helsinki                                                                                                     | Finland                                                    |
| Lindstrom Friggens, Nina     | Plant-Soil Ecologist, PhD                                   | University of Stirling                                                                                                     | United Kingdom of Great Britain and Northern Ireland (the) |
| Ling, W                      | Research Scientist                                          | Institut de Biologie Structurale                                                                                           | France                                                     |
| Ling, Robert                 | Professor of Biology                                        | Kankakee Community College                                                                                                 | United States of America (the)                             |
| Lingaraju, Mahesh            | PhD student                                                 | Max-Planck Institute                                                                                                       | Germany                                                    |
| Linge, Stefan                | Nordic Master in Cold Climate Engineering                   | DTU Space                                                                                                                  | Denmark                                                    |
| Lingnau, Rodrigo             | Professor                                                   |                                                                                                                            | Brazil                                                     |
| Lingua, Emanuele             | Associate Professor in forest ecology and management        | University of Padova                                                                                                       | Italy                                                      |
| Linhares Dantas, Maria Luiza | PhD Candidate Astrophysics                                  | Universidade de São Paulo                                                                                                  | Brazil                                                     |
| Link, Andrés                 | Associate Professor in Biology                              | Universidad de Los Andes                                                                                                   | Colombia                                                   |
| Link, Roman Mathias          | Research Fellow                                             | Institute of Botany II, University of Würzburg                                                                             | Germany                                                    |
| Linke, Natalie               | Project Manager                                             | Monash University                                                                                                          | Australia                                                  |
| Linkhorst, Annika            |                                                             | Uppsala University                                                                                                         | Sweden                                                     |
| Linnanen, Lassi              | Professor, Sustainability Science                           | Lappeenranta-Lahti University of Technology                                                                                | Finland                                                    |
| Lino, Sofia                  | PhD student                                                 | Faculty of Sciences University of Lisbon                                                                                   | Portugal                                                   |
| Lins, Lidia                  | Postdoctoral researcher                                     | Ghent University                                                                                                           | Belgium                                                    |
| Lintermans, Mark             | Principal Research Fellow, Centre for Applied Water Science | Institute for Applied Ecology, University of Canberra                                                                      | Australia                                                  |
| LINTON, MARIA ANGELICA       | Professor - Phycology                                       | Universidade Federal de Santa Maria                                                                                        | Brazil                                                     |
| Lintulaakso, Kari            | Collection Coordinator                                      | Finnish Natural History Museum (FNHM)                                                                                      | Finland                                                    |
| Lintzel, Esther-Marie        | Finished Master student, Biology (soil and fauna ecology)   | Institut für integrative Biodiversitätsforschung - iDIV                                                                    | Germany                                                    |
| Lippmann, Tanya              | PhD Candidate                                               | Vrije Universiteit Amsterdam                                                                                               | Netherlands (the)                                          |
| Lipsewers, Tobias            | PhD student                                                 | Finnish Environment Institute                                                                                              | Finland                                                    |
| Lisboa, Carolina             | Biologist                                                   | Universidade Federal do Rio Grande do Norte                                                                                | Brazil                                                     |
| Lissau, Jonas Sandby         | Postdoc, Chemical Physics, Solar Energy                     | University of Southern Denmark                                                                                             | Denmark                                                    |
| Lister, Adrian               | Professor and Research Leader                               | Natural History Museum                                                                                                     | United Kingdom of Great Britain and Northern Ireland (the) |
| Lisztes-Szabó, Zsuzsa        | Researcher                                                  | Isotope Climatology and Environmental Research Centre (ICER) Institute for Nuclear Research, Hungarian Academy of Sciences | Hungary                                                    |
| Litchfield, Carla            | Head of Discipline: Psychology                              | University of South Australia                                                                                              | Australia                                                  |
| Literáková, Petra            |                                                             | Global Change Research Institute Czech Academy of Science                                                                  | Czech Republic (the)                                       |
| Little, Mary                 | Lecturer - Environmental Ethics and Human Rights            | School for Field Studies                                                                                                   | Costa Rica                                                 |
| Litton, Creighton            | Professor                                                   | University of Hawaii at Manoa                                                                                              | United States of America (the)                             |
| Litus, Greg                  | Horticulture                                                | Colorado State University                                                                                                  | United States of America (the)                             |
| Litza, Kathrin               |                                                             | Institute of Ecology, University Bremen                                                                                    | Germany                                                    |
| Liu, Dibo                    | Postdoc                                                     | Leibniz-Institute of Freshwater Ecology and Inland Fisheries                                                               | Germany                                                    |

|                           |                                                                                                |                                                                   |                                                            |
|---------------------------|------------------------------------------------------------------------------------------------|-------------------------------------------------------------------|------------------------------------------------------------|
| Livingston, Jack          | Associate Professor                                                                            | Slippery Rock University                                          | United States of America (the)                             |
| Liz, André Vicente        | PhD candidate                                                                                  | CIBIO/InBIO                                                       | Portugal                                                   |
| Lizana, Miguel            | professor of Zoology                                                                           | Universidad de Salamanca                                          | Spain                                                      |
| Lizotte, Martine          | Oceanographer                                                                                  | Université Laval                                                  | Canada                                                     |
| Ljung, Karl               | Lecturer in geology                                                                            | Department of geology, Lund University                            | Sweden                                                     |
| Ljunggren Söderman, Maria | Associate professor                                                                            | Environmental Systems Analysis, Chalmers University of Technology | Sweden                                                     |
| Llanos-Garrido, Alejandro | Postdoctoral                                                                                   | Complutense University of Madrid                                  | Spain                                                      |
| Llewellyn, Anne           | Environmental research                                                                         | Retired                                                           | United States of America (the)                             |
| Llewellyn-Zaidi, Aimee    | Genetics and Metabolomics                                                                      |                                                                   | United States of America (the)                             |
| Llirós, Marc              | Postdoctoral Researcher                                                                        | Girona Biomedical Research Institute                              | Spain                                                      |
| Llopis, Jorge C.          | PhD candidate                                                                                  | University of Bern                                                | Switzerland                                                |
| Llorens, Laura            | Associate Professor, Department of Environmental Sciences                                      | University of Girona                                              | Spain                                                      |
| Llorens, Pilar            | Researcher, Hydrology                                                                          | IDAEA-CSIC                                                        | Spain                                                      |
| Llorente, Miquel          | Director                                                                                       | Institut de Recerca i Estudis en Primatologia, IPRIM              | Spain                                                      |
| Llorente Rodríguez, Laura | Assistant Professor                                                                            | Universiteit Leiden                                               | Netherlands (the)                                          |
| Llort, Joan               | Researcher in Marine Biogeochemistry                                                           | Barcelona Supercomputing Centre                                   | Spain                                                      |
| Llosa, Matxalen           | Professor                                                                                      | University of Cantabria                                           | Spain                                                      |
| LLOVEL, William           | Researcher                                                                                     | CNRS                                                              | France                                                     |
| Lloyd, Thomas             | Conservation Scientist                                                                         |                                                                   | Australia                                                  |
| Lloyd, John               | Associate Director of Research                                                                 | American Wind Wildlife Institute                                  | United States of America (the)                             |
| Lo, Min-Hui               | Associate Professor                                                                            |                                                                   | Taiwan                                                     |
| Lo, Kim                   | Senior Research Associate                                                                      |                                                                   | New Zealand                                                |
| Loader, María Cristina    | Infectious Diseases Specialist Registrar                                                       | Imperial College London                                           | United Kingdom of Great Britain and Northern Ireland (the) |
| Loaiza del Pozo, Kathia   | M.D.                                                                                           |                                                                   | Australia                                                  |
| Lobão, Adriana            | Botanist/systematic of Angiosperms, Biogeography                                               | Universidade Federal Fluminense                                   | Brazil                                                     |
| Lobo, Catarina            | Professor Auxiliar/Researcher Physics and Astronomy                                            | Universidade do Porto                                             | Portugal                                                   |
| Lobo, Jorge               | Research Professor                                                                             | CSIC                                                              | Spain                                                      |
| Loboda, Sarah             | Entomology                                                                                     | Université McGill                                                 | Canada                                                     |
| Lobry, Olivier            | Research Engineer in Computer Science                                                          | CNRS                                                              | France                                                     |
| Locatelli, Bruno          | Scientist                                                                                      | CIRAD, University of Montpellier (France), CIFOR (Peru)           | Peru                                                       |
| Lochon, Iris              | PhD, Agroecology                                                                               |                                                                   | France                                                     |
| Lockley, Catherine        | Nutrition Scientist                                                                            | Charles Sturt University                                          | Australia                                                  |
| Loconto, Paul             | Consultant in Analytical Chemistry and in Chemical Education                                   | none                                                              | United States of America (the)                             |
| Lodynsky, Lydia           | Health & Wellness                                                                              | Yale University                                                   | United States of America (the)                             |
| Loew, Thomas              | Director / Corporate Sustainability Management, Governance. Management of Climate Related Risk | Institute for Sustainability                                      | Germany                                                    |
| Loewen, Ann               | Medical doctor and population health graduate student                                          | University of Manitoba                                            | Canada                                                     |

|                         |                                                   |                                                              |                                                            |
|-------------------------|---------------------------------------------------|--------------------------------------------------------------|------------------------------------------------------------|
| Löf, Annette            | Researcher in Environmental communication         | Swedish University of Agricultural Science                   | Sweden                                                     |
| Löffler, Christin       | Scientist                                         | Rostock University Medical Center                            | Germany                                                    |
| Löffler, Berndt         | Dr. med. Dipl.Psych., Cardiologist                |                                                              | Germany                                                    |
| Logan, Stuart           | Scientific Sales Specialist                       |                                                              | United Kingdom of Great Britain and Northern Ireland (the) |
| Logan, Mitchel          | Biocontrol for Hawaii Department of Agriculture   | HDOA                                                         | United States of America (the)                             |
| Logiudice, Frank        | Senior instructor                                 | University of Central Florida                                | United States of America (the)                             |
| LoGiudice, Kathleen     | Professor of Biology                              | Union Collete                                                | United States of America (the)                             |
| Logrono, Washington     | PhD student                                       | UFZ                                                          | Germany                                                    |
| Loh, Alan               | Astrophysics                                      | Paris Observatory                                            | France                                                     |
| Lohbeck, Madelon        | scientist functional ecology and land restoration | World Agroforestry                                           | Kenya                                                      |
| Lohmann, Sophie         | Research Scientist                                | Max Planck Institute for Demographic Research                | Germany                                                    |
| Lohmus, Asko            | Research Professor and Chair of Natural Resources | University of Tartu                                          | Estonia                                                    |
| Lõhmus, Piret           | senior researcher on conservation biology         | Institute of Ecology and Earth Sciences, University of Tartu | Estonia                                                    |
| Lohse, Tim              | Sustainability Consultant                         | GreenDelta                                                   | Germany                                                    |
| Loik, Michael           | Professor                                         | University of California, Santa Cruz                         | United States of America (the)                             |
| Loiseau, Vincent        | PhD student in Biology                            | CNRS                                                         | France                                                     |
| Lojewski, Christian     | Doctor                                            | Charité                                                      | Germany                                                    |
| Loke, Vivienne          | Environmental science                             |                                                              | Malaysia                                                   |
| Lomaeva, Maria          | Young Graduate Trainee                            | European Space Agency                                        | Netherlands (the)                                          |
| Lombaert, Eric          | Research engineer in Evolutionary Biology         | INRA                                                         | France                                                     |
| Lombal, Anicee          | PhD Candidate                                     | University of Tasmania                                       | Australia                                                  |
| Lombardero, María       | Associate Professor                               | Universidad de Santiago de Compostela                        | Spain                                                      |
| Lombardi, Celia         | Psychology                                        | privat                                                       | Argentina                                                  |
| Lombroso, Luca          | Meteorologist AMPRO                               | Geophysical Observatory, DIEF UNIMORE                        | Italy                                                      |
| Lona Durazo, Frida      | PhD candidate                                     | University of Toronto                                        | Canada                                                     |
| London, Annamaria       | Pharmacist                                        | University of Szeged                                         | Hungary                                                    |
| Long, Kelsie            | Postdoctoral researcher                           | Australian National University                               | Australia                                                  |
| Long, Channen           | PhD candidate in Ecophysiology                    | University of Pretoria                                       | South Africa                                               |
| Long, Andrew            | Associate Professor of Mathematics and Statistics | Northern Kentucky University                                 | United States of America (the)                             |
| Longaretti, Pierre-Yves | CNRS researcher — Sustainability Science          | Université Grenoble Alpes / CNRS / INRIA                     | France                                                     |
| Longmore, Steven        | Professor of Astrophysics                         | Liverpool John Moores University                             | United Kingdom of Great Britain and Northern Ireland (the) |
| Longo, Michael          | Professor emeritus, Physics                       | University of Michigan                                       | United States of America (the)                             |
| Longuetaud, Fleur       | Researcher on forest growth and wood quality      | INRA                                                         | France                                                     |
| Lonni, Valentin         | Chargé de mission DCSMM                           | Museum National d'Histoire Naturelle                         | France                                                     |
| Loonen, Maarten         | Associate Professor Arctic Ecology                | University of Groningen, Arctic Centre                       | Netherlands (the)                                          |
| Loot, Céline            |                                                   | Institut Pasteur, CR CN, CNRS                                | France                                                     |
| Lopera-Toro, Alejandro  | Resesrcher                                        | Asociación GAICA                                             | Colombia                                                   |
| lopes, ileyne           | Ecologist                                         | Universidade Federal do Ceará - UFC                          | Brazil                                                     |

|                                 |                                                                 |                                                                                                           |           |
|---------------------------------|-----------------------------------------------------------------|-----------------------------------------------------------------------------------------------------------|-----------|
| Lopes, Myriam                   | Assitant Professor                                              | CESAM & University of Aveiro                                                                              | Portugal  |
| Lopes, Luís                     | Engenheiro                                                      | Apief                                                                                                     | Portugal  |
| Lopes, Cassiane                 | Master student                                                  | Universidade Federal do Pampa                                                                             | Brazil    |
| Lopes, Priscila                 | Human Ecologist                                                 | Universidade Federal do Rio Grande do Norte                                                               | Brazil    |
| Lopes, Aline                    | post doctoral in Ecology                                        | Universidade de Brasília                                                                                  | Brazil    |
| Lopes, Gerson                   | Biologist/Conservation                                          | Instituto de Desenvolvimento Sustentável Mamirauá                                                         | Brazil    |
| Lopes, Ariadna                  | Professor, Plant Ecology                                        | Universidade Federal de Pernambuco                                                                        | Brazil    |
| Lopes, Luisa                    | Analista Ambiental                                              | Instituto Chico Mendes de Conservação da Biodiversidade - ICMBio                                          | Brazil    |
| Lopez, Clément J.R.             | Earth Science                                                   | Experimental Station of Arid Zones - CSIC                                                                 | Spain     |
| Lopez, Omr                      | Director of the National Research System / Biologist            | Secretaria Nacional de Ciencia Tecnología e Innovación                                                    | Panama    |
| Lopez, Ariel                    | Herpetology researcher                                          | Instituto Nacional de Medicina Tropical                                                                   | Argentina |
| Lopez, Omar                     | Plant Biologist                                                 | SENACYT                                                                                                   | Panama    |
| López, Mercedes G.              | Professor/Ph.D.                                                 | Cinvestav                                                                                                 | Mexico    |
| López, Luis                     | Biologist                                                       | Asociación Vida Silvestre Amazónica                                                                       | Peru      |
| López, Naiara                   | PhD Candidate                                                   | University of the Basque Country                                                                          | Spain     |
| López Alvarado, Silvia          | Teacher/researcher (sexology); PhD candidate                    | Universidad de Cuenca and KULeuven                                                                        | Ecuador   |
| Lopez Barrera, Fabiola          | Full-Time Researcher / restoration ecology                      | Instituto de Ecología, A.C.                                                                               | Mexico    |
| LOPEZ BAUCCELLS, ADRIA          | BIOLOGIST - CONSERVATIONIST                                     | NATURAL SCIENCES MUSEUM OF GRANOLLERS                                                                     | Spain     |
| López Calderón, Cosme           | Pos-doc position                                                | University of Seville                                                                                     | Spain     |
| López Munguia, Agustin          | Resesrcher                                                      | Instituto de Biotecnología, UNAM                                                                          | Mexico    |
| López Portillo, Jorge           | Main researcher                                                 | Instituto de Ecología, A.C.                                                                               | Mexico    |
| López Rodríguez, Manuel Jesús   | Associate Professor                                             | University of Granada                                                                                     | Spain     |
| LOPEZ VALDES, NESTOR            | VULCANOLOGIST                                                   | UNAM                                                                                                      | Mexico    |
| López- Lozano, Nguyen Esmeralda | Researcher in microbial ecology                                 | Instituto Potosino de Investigación Científica y Tecnológica (IPICYT)                                     | Mexico    |
| López-Arbarello, Adriana        | Researcher / Palaeontology                                      | Department of Earth and Environmental Sciences, Palaeontology & Geobiology, Ludwig-Maximilians-University | Germany   |
| López-Archilla, Ana Isabel      | Full Professor in Microbial Ecology                             | Universidad Autónoma de Madrid                                                                            | Spain     |
| López-Bao, José Vicente         |                                                                 | Oviedo University                                                                                         | Spain     |
| López-Barrera, Fabiola          | Researcher                                                      | Instituto de Ecología, A.C.                                                                               | Mexico    |
| López-Bosch, David              | Biology and ecology                                             | Autonomous University of Barcelona                                                                        | Spain     |
| Lopez-Bustins, Joan A.          | Associate Professor                                             | University of Barcelona                                                                                   | Spain     |
| López-Corona, Oliver            | Cátedras CONACyT Researcher and asocieted researcher at C3-UNAM | CONACyT-CONABIO; C3, UNAM                                                                                 | Mexico    |
| Lopez-Garcia, Jose Maria        | Geologist                                                       | Instituto Geologico y Minero de España (Geological Survey of Spain)                                       | Spain     |
| Lopez-Garcia, Purificacion      | Research Director                                               | CNRS                                                                                                      | France    |
| Lopez-Gomez, Carlos             | Postdoctoral/Biomedicine                                        | IBIMA                                                                                                     | Spain     |
| Lopez-Gonzalez, Celia           | Professor /Systematics and Biogeography                         | Instituto Politecnico Nacional                                                                            | Mexico    |

|                                  |                                                                                                                                                                                                       |                                                                                           |                   |
|----------------------------------|-------------------------------------------------------------------------------------------------------------------------------------------------------------------------------------------------------|-------------------------------------------------------------------------------------------|-------------------|
| López-Jiménez, Nicolás           | Species Conservation Program Officer / Biology                                                                                                                                                        | Sociedad Española de Ornitología / BirdLife International                                 | Spain             |
| Lopez-Mariscal, Manuel           | Research Scientist, Physical Oceanography                                                                                                                                                             | CICESE                                                                                    | Mexico            |
| Lopez-Marquez, Violeta           | PhD Student                                                                                                                                                                                           | Museo Nacional de Ciencias Naturales                                                      | Spain             |
| López-Núñez, Francisco Alejandro | PhD student                                                                                                                                                                                           | Centre for Functional Ecology, University of Coimbra                                      | Portugal          |
| López-Quiroga, Eva               | Biologist                                                                                                                                                                                             | Universidad de Vigo                                                                       | Spain             |
| López-Victoria, Mateo            | Director of the Biology Program                                                                                                                                                                       | Pontificia Universidad Javeriana Cali                                                     | Colombia          |
| LOPEZ-WILCHIS, RICARDO           | Biological researcher                                                                                                                                                                                 | Universidad Autónoma Metropolitana                                                        | Mexico            |
| Lorda, Julio                     | Professor                                                                                                                                                                                             | UABC                                                                                      | Mexico            |
| Lorenz, Eva                      | Epidemiology and Biostatistics                                                                                                                                                                        |                                                                                           | Germany           |
| Lorenz, Julia                    | Biologist, research associate                                                                                                                                                                         | Leibniz Institute for Zoo and Wildlife Research (IZW)                                     | Germany           |
| Lorenz, Sabine                   | Agriculture/Pesticides Residues                                                                                                                                                                       | Industry                                                                                  | Germany           |
| LORETTE, Guillaume               | Doctor in Hydrogeology                                                                                                                                                                                | Causses du Quercy UNESCO Global Geoparc                                                   | France            |
| Loretto, Matthias-Claudio        | Postdoctoral Researcher / Animal Behaviour                                                                                                                                                            | Max Planck Institute of Animal Behavior                                                   | Germany           |
| Lorimer, Graeme                  | Environmental Scientist                                                                                                                                                                               | Biosphere Pty Ltd                                                                         | Australia         |
| Lorrilliere, Romain              | Post-Doc                                                                                                                                                                                              | CESCO - National Museum of Natural History, Paris                                         | France            |
| Lorz, Tamara                     | Researcher in Sustainability Marketing                                                                                                                                                                | Ludwig-Maximilians-Universität München                                                    | Germany           |
| Losapio, Gianalberto             | Researcher, Ecology                                                                                                                                                                                   |                                                                                           | Switzerland       |
| Losier, Donald                   | BSc. Physics                                                                                                                                                                                          | Retired                                                                                   | Canada            |
| Lossen, Jan                      | Project manager, crystalline silicon solar cells                                                                                                                                                      | International Solar Energy Research Center Konstanz e.V.                                  | Germany           |
| Lotufo, Tito                     | Associate Professor                                                                                                                                                                                   | Oceanographic Institute, University of Sao Paulo                                          | Brazil            |
| Lotzkat, Sebastian               | Biology                                                                                                                                                                                               | Staatliches Museum für Naturkunde Stuttgart                                               | Germany           |
| Louapre, Philippe                | Associate professor - Ecology                                                                                                                                                                         | University of Burgundy                                                                    | France            |
| Loubéry, Sylvain                 | Plant biologist                                                                                                                                                                                       | University of Geneva                                                                      | Switzerland       |
| Loubser, David                   | Environmental Consultant in the field of Ecosystem Services and Climate Adaptation                                                                                                                    | Ecosystem Services Ltd                                                                    | New Zealand       |
| Louge, Thierry                   | Ph.D, computer science                                                                                                                                                                                |                                                                                           | France            |
| Louis, Marie                     | Post-doctoral fellow                                                                                                                                                                                  | University of Copenhagen                                                                  | France            |
| Louis, Fiona                     | Postdoctoral Researcher in Tissue engineering                                                                                                                                                         | Osaka University                                                                          | Japan             |
| Loukakakis, Kyriakos             | Mechanical Engineer, M.Sc. Engineering-Economic Systems. Free-Lance business consultant, manager of Programmes to support the olive oil and table olives sector (Regulation EU 1308/2013, article 29) | Agricultural cooperatives' Union of Laconia S.A. and collaborating producer organizations | Greece            |
| Loureiro, João                   | Assistant Professor                                                                                                                                                                                   | Centre for Functional Ecology, Departament of Life Sciences, University of Coimbra        | Portugal          |
| Lourenço, Rui                    | Researcher - Animal Ecology                                                                                                                                                                           | University of Évora                                                                       | Portugal          |
| Lourenço, Giselle                | PhD Ecology reaserch                                                                                                                                                                                  | Unicamp                                                                                   | Brazil            |
| Lourenço, Carla R.               | Marine Biology, PhD                                                                                                                                                                                   |                                                                                           | Portugal          |
| Lourenço, André                  | PhD student                                                                                                                                                                                           | CIBIO                                                                                     | Portugal          |
| Lourenço, Pedro                  | Lecturer                                                                                                                                                                                              | Hanze University of Applied Sciences                                                      | Netherlands (the) |
| Louvrier, Julie                  | PostDoc in Statistical Ecology                                                                                                                                                                        | leibniz IZW, Berlin                                                                       | Germany           |

|                          |                                                               |                                                                                                                                |                                                            |
|--------------------------|---------------------------------------------------------------|--------------------------------------------------------------------------------------------------------------------------------|------------------------------------------------------------|
| Louw, Marike             | MSc Zoology                                                   | Stellenbosch University                                                                                                        | South Africa                                               |
| Louzon, Maxime           | Researcher doctoral                                           | UMR CNRS 6249 Chrono-environnement, Université Franche-Comte                                                                   | France                                                     |
| Lovari, Sandro           | Full professor of Animal Behaviour                            | Maremma Natural History Museum                                                                                                 | Italy                                                      |
| Loveday, Jane            | Post graduate student in landscape design for heat mitigation | Curtin University                                                                                                              | Australia                                                  |
| Lovegrove-Walsh, Jessica | Research Assistant                                            | University of Vienna                                                                                                           | Austria                                                    |
| Lovejoy, Thomas          | Univ Prof Environmental Science and Policy                    | George Mason University                                                                                                        | United States of America (the)                             |
| Loveridge, Robin         | PhD Researcher                                                | University of York                                                                                                             | United Kingdom of Great Britain and Northern Ireland (the) |
| Lovett, Charles          | Professor of Chemistry                                        | Williams College                                                                                                               | United States of America (the)                             |
| Lovett, Jennifer         | Conservation Biologist/Author                                 |                                                                                                                                | United States of America (the)                             |
| Low, Matthew             | Associate Professor in Ecology                                | Swedish University of Agricultural Sciences                                                                                    | Sweden                                                     |
| Löw Beer, David          | Research Associate                                            | IASS Potsdam                                                                                                                   | Germany                                                    |
| Lowe, Rachael            | PhD Scholar                                                   | Fenner School of Environment & Society, Australian National University                                                         | Australia                                                  |
| Lowe, Ian                | Emeritus Professor                                            | Griffith University                                                                                                            | Australia                                                  |
| Lowenthal, James         | Professor of Astronomy                                        | Smith College                                                                                                                  | United States of America (the)                             |
| Lowman, Meg              | Director                                                      | Tree Foundation                                                                                                                | United States of America (the)                             |
| LOY, ANNA                | ASSOCIATE PROFESSOR IN ZOOLOGY                                | UNIVERSITY OF MOLISE - DEPT. BIOSCIENCES AND TERRITORY                                                                         | Italy                                                      |
| Loyau, Adeline           | Researcher in Mountain ecology                                | IGB                                                                                                                            | Germany                                                    |
| lozano, clément          | Sorbonne Université                                           |                                                                                                                                | France                                                     |
| Lozano, Jorge            | Lecturer in Ecology                                           | Complutense University of Madrid                                                                                               | Spain                                                      |
| Lozano, Diego            | Research Scientist                                            | Neuroelectrics                                                                                                                 | Spain                                                      |
| Lozano, Verónica Laura   | PhD.student in Limnology                                      | IEGEBE-CONICET, Argentina                                                                                                      | Argentina                                                  |
| Lozano Lazo, Denise      | PhD candidate in Sustainability Science                       | Univesity of Tokyo                                                                                                             | Bolivia (Plurinational State of)                           |
| Lu, Jingzhong            | PhD student, Animal Ecology                                   | University of Göttingen                                                                                                        | Germany                                                    |
| Lubitz, Timo             | Postdoctoral researcher in Theoretical Biophysics             | Humboldt University Berlin                                                                                                     | Germany                                                    |
| Lucas, Yolanda           | PhStudent                                                     | Universidad Autónoma de Madrid                                                                                                 | Spain                                                      |
| Lucas, Matthew Q.        | Assistant Professor of Biology                                | Inter American University, Arecibo, Puerto Rico                                                                                | United States of America (the)                             |
| Lucas Trujillo, Laura    | PhD candidate                                                 | Unicamp                                                                                                                        | Brazil                                                     |
| Lucena-Perez, Maria      | PhD Student, Genomics and Conservation                        | Estacion Biologica de Doñana, EBD-CSIC                                                                                         | Spain                                                      |
| Lucifora, Luis O.        | Full-time Investigator, Aquatic ecology                       | Instituto Nacional de Limnología, Consejo Nacional de Investigaciones Científicas y Técnicas, Universidad Nacional del Litoral | Argentina                                                  |
| Luck, Gary               | Adjunct Professor in Ecology and Interdisciplinary Science    | Charles Sturt University                                                                                                       | Australia                                                  |
| LUCOT, Eric              | Associate professor                                           | Université de Franche-Comté                                                                                                    | France                                                     |
| Ludwig, Joachim          | Professor, educational sciences                               | University of Potsdam                                                                                                          | Germany                                                    |
| Luebke, Ana Katharina    | PhD student                                                   | Max-Planck-Institute for molecular genetics                                                                                    | Germany                                                    |
| Lueck, Michael           | Professor fo Tourism                                          | Auckland University of Technology                                                                                              | New Zealand                                                |

|                           |                                                                                                                                                              |                                                                        |                                                            |
|---------------------------|--------------------------------------------------------------------------------------------------------------------------------------------------------------|------------------------------------------------------------------------|------------------------------------------------------------|
| Luetz, Johannes           | Social Sciences; Interdisciplinarity                                                                                                                         | University of New South Wales (UNSW); Christian Heritage College (CHC) | Australia                                                  |
| Luger, Christianne        | Junior Researcher in Hydology                                                                                                                                | Deltares                                                               | Netherlands (the)                                          |
| Luhta, Tuija              | Geophysicist, Research Technician                                                                                                                            | University of Helsinki, Institute of Seismology                        | Finland                                                    |
| Luis Calabuig, Estanislao | Rull                                                                                                                                                         | Catedrático de Ecología Universidad de León                            | Spain                                                      |
| Łukasik, Piotr            | Assistant Professor, Biology                                                                                                                                 | Jagiellonian University                                                | Poland                                                     |
| Lukaszewicz, Marcin       | Biotechnology                                                                                                                                                | Uniwersytet Wrocławski                                                 | Poland                                                     |
| Luke, Hanabeth            | Lecturer in the School of Environment, Science & Engineering                                                                                                 | Southern Cross University                                              | Australia                                                  |
| Luksenburg, Jolanda       | Postdoc, Environmental Biology                                                                                                                               | Leiden University                                                      | Netherlands (the)                                          |
| Lula Costa, Ana Paula     | Phd student                                                                                                                                                  | Federal University of Parana                                           | Brazil                                                     |
| Luma, Sergio              | Professor of Zoology                                                                                                                                         | Universidade Federal do Rio Grande do Norte                            | Brazil                                                     |
| Luminet, Jean-Pierre      | Astrophysics                                                                                                                                                 | CNRS                                                                   | France                                                     |
| Luna, Leilton Willians    | Ph.D. Student in Zoology                                                                                                                                     | Emílio Goeldi Museum                                                   | Brazil                                                     |
| Luna, Francisco           | Profesor                                                                                                                                                     | Universidad de Guanajuato                                              | Mexico                                                     |
| Luna-Laurent, Emilie      | Research Assistant - Hydrology                                                                                                                               |                                                                        | France                                                     |
| Lund-Ricard, Yasmine      | PhD student in Biology                                                                                                                                       | Sorbonne Université                                                    | France                                                     |
| Lundberg, Petter          | Ph.D. in Experimental Physics                                                                                                                                | Department of Physics                                                  | Sweden                                                     |
| Lundgren, Magnus          | Geneticist                                                                                                                                                   | Uppsala University                                                     | Sweden                                                     |
| Luporini, Pierangelo      | emeritus zoology                                                                                                                                             | University Camerino                                                    | Italy                                                      |
| Luque, Ángel              | Titular Professor (Zoology and Marine Biology), Biology Department (retired); Researcher Centro de Investigación en Biodiversidad y Cambio Global (CIBC-UAM) | Universidad Autónoma de Madrid                                         | Spain                                                      |
| Lurie, Patrycja           | Neuron reconstruction specialist                                                                                                                             | EPFL                                                                   | Switzerland                                                |
| Luscombe, Christine       | Materials Science and Engineering                                                                                                                            | University of Washington, Seattle                                      | United States of America (the)                             |
| Lush, Mike                | Ecologist                                                                                                                                                    |                                                                        | United Kingdom of Great Britain and Northern Ireland (the) |
| Lusiana, Betha            | Ecological Modeller                                                                                                                                          | World Agroforestry                                                     | Indonesia                                                  |
| Lute, Michelle            | Wildlife Conservation Scientist                                                                                                                              | Texas State University                                                 | United States of America (the)                             |
| Lutz, Stefanie            |                                                                                                                                                              | Helmholtz Centre for Environmental Research - UFZ                      | Germany                                                    |
| Lutz, Ilka                | Dr.                                                                                                                                                          | Leibniz-Institute for Freshwater Ecology and Inland Fisheries          | Germany                                                    |
| Luu, Hai                  | Lecturer                                                                                                                                                     | Travinh University                                                     | Viet Nam                                                   |
| Luyckx, Marie             | phD student                                                                                                                                                  | Université Catholique de Louvain-la-Neuve (UCL)                        | Belgium                                                    |
| Luyssaert, Sebastiaan     | Associate professor                                                                                                                                          | VU Amsterdam                                                           | Netherlands (the)                                          |
| Luz, Lafayette            | Professor                                                                                                                                                    | Federal University of Bahia                                            | Brazil                                                     |
| LUZ, DIRCE FERREIRA LUZ   | Biólogo                                                                                                                                                      | Universidade Federal de Mato Grosso do Sul                             | Brazil                                                     |
| Lydecker, Henry           | Researcher / Parasite Ecology                                                                                                                                | University of Sydney                                                   | Australia                                                  |
| Lyndby, Niclas            | PhD student                                                                                                                                                  | EPFL                                                                   | Switzerland                                                |
| Lynn, William             | Research Scientist                                                                                                                                           | Marsh Institute, Clark University                                      | United States of America (the)                             |
| Lynn, Lorene              | Soil Scientist                                                                                                                                               | Red Mountain Consulting LLC                                            | United States of America (the)                             |

|                                |                                                                                  |                                                                                                                              |                                                            |
|--------------------------------|----------------------------------------------------------------------------------|------------------------------------------------------------------------------------------------------------------------------|------------------------------------------------------------|
| Lyon, Christopher              | Research Fellow                                                                  | University of Leeds                                                                                                          | United Kingdom of Great Britain and Northern Ireland (the) |
| Lyons, Andrew                  | Academic Coordinator                                                             | University of California Division of Agriculture and Natural Resources                                                       | United States of America (the)                             |
| Lyons, Sarah                   | Graduate student                                                                 | University of British Columbia                                                                                               | Canada                                                     |
| Lyytimäki, Jari                | Senior researcher                                                                | Finnish Environment Institute                                                                                                | Finland                                                    |
| M Flores, Bernardo             | Postdoc                                                                          | UNICAMP                                                                                                                      | Brazil                                                     |
| Ma, Xiaoya                     | Senior Research Fellow                                                           | University of Exeter                                                                                                         | United Kingdom of Great Britain and Northern Ireland (the) |
| Maan, Martine                  | Associate Professor in Evolutionary Biology                                      | University of Groningen                                                                                                      | Netherlands (the)                                          |
| Maas, Bea                      | PostDoc in Biology/Ecology                                                       | University of Vienna                                                                                                         | Austria                                                    |
| Maas, Barbara                  | Wildlife ecology                                                                 | People for Nature & Peace                                                                                                    | United Kingdom of Great Britain and Northern Ireland (the) |
| Mabile, Laurence               | Engineer                                                                         | Université Paul Sabatier Toulouse III, France                                                                                | France                                                     |
| Mabin, Christopher             | Marine ecology                                                                   | University of Tasmania                                                                                                       | Australia                                                  |
| Mabrouk, Ayman                 | Marine Ecologist                                                                 | CSS/NOAA                                                                                                                     | United States of America (the)                             |
| MacAlister, Dunja              | PhD student                                                                      | University of Cape Town                                                                                                      | South Africa                                               |
| Macaulay, Jamie                | Research Bioacoustics                                                            | University of St Andrews                                                                                                     | United Kingdom of Great Britain and Northern Ireland (the) |
| MacColl, Chris                 | PhD Candidate, Ecology                                                           | University of Queensland                                                                                                     | Australia                                                  |
| Macdonald, Ian A W             | International Environmental Consultant                                           | Private Consultancy                                                                                                          | South Africa                                               |
| MacDonald, Michael             | Graduate Student Ecology                                                         | Montana State University                                                                                                     | United States of America (the)                             |
| Macé, Matthias                 | Associate Researcher                                                             | Laboratoire d' Anthropobiologie Moléculaire et Imagerie de Synthèse, CNRS UMR 5288, Université Paul Sabatier, 31000 Toulouse | France                                                     |
| Macedo, Regina                 | Professor                                                                        | Universidade de Brasilia                                                                                                     | Brazil                                                     |
| Machado, Liliane               | professor                                                                        | Universidade Federal da Paraíba                                                                                              | Brazil                                                     |
| Machado, Glauco                | Full Professor                                                                   | University of Sao Paulo                                                                                                      | Brazil                                                     |
| Machado, Patrícia              |                                                                                  | Unicamp - SP                                                                                                                 | Brazil                                                     |
| Machado, Marlon Magno Monteiro | Master's in Development Practice / Master's in Science Education and PhD Student | Universidade Federal Rural do Rio de Janeiro / Universidade Federal do Rio de Janeiro                                        | Brazil                                                     |
| Machado, Ana Paula             | PhD candidate - population genetics                                              | Department of Ecology and Evolution, University of Lausanne                                                                  | Switzerland                                                |
| Machado, Ricardo               | Associated Professor - Landscape Ecology                                         | University of Brasilia                                                                                                       | Brazil                                                     |
| Machado, Pedro                 | Researcher - Planetary Atmospheres                                               | Institute of Astrophysics and Space Sciences                                                                                 | Portugal                                                   |
| MACHADO, LUIZ AUGUSTO          | Atmospheric Science                                                              | INPE                                                                                                                         | Brazil                                                     |
| Macheriotou, Lara              | PhD candidate                                                                    | Ghent University                                                                                                             | Belgium                                                    |
| Machín, Francisco              | Assistant Lecturer                                                               | Universidad de Las Palmas de Gran Canaria                                                                                    | Spain                                                      |
| Machingura, James              | Ecologist/Entomologist                                                           | Institute for Water Studies, University of the Western Cape                                                                  | South Africa                                               |
| Machon, Cristina               | Research associate                                                               | IBMB                                                                                                                         | Spain                                                      |
| Machon, Nathalie               | Professor of Ecology                                                             | Museum National d'Histoire Naturelle                                                                                         | France                                                     |

|                            |                                                        |                                                                     |                                                            |
|----------------------------|--------------------------------------------------------|---------------------------------------------------------------------|------------------------------------------------------------|
| Machordom, Annie           | Senior Researcher                                      | Museo Nacional de Ciencias Naturales (MNCN-CSIC)                    | Spain                                                      |
| Machura, Michael           | Ecologist                                              | The Morton Arboretum                                                | United States of America (the)                             |
| Macía, Manuel J.           | Associate Professor                                    | Universidad Autónoma de Madrid                                      | Spain                                                      |
| Macia-Vicente, Jose G.     | Postdoc/mycology                                       | Goethe University Frankfurt                                         | Germany                                                    |
| Macías, Nuria              | Biologist                                              | University of Helsinki                                              | Finland                                                    |
| Macías Garcia, Constantino | Full time researcher, Director                         | Instituto de Ecología, Universidad Nacional Autónoma de México      | Mexico                                                     |
| Macieira, Raphael          | Professor                                              | Universidade Vila Velha                                             | Brazil                                                     |
| Maciel Lyra, Paulo Roberto | Full Professor / Mechanical Engineering                | Federal University of Pernambuco                                    | Brazil                                                     |
| Maciorowski, Anthony       | Deputy Director, Science Advisory Board, Retired       | US Environmental Protection Agency                                  | United States of America (the)                             |
| Mack, Erin                 | Postdoc                                                | University of Idaho                                                 | United States of America (the)                             |
| Mackay, Eleanor            | Freshwater Ecologist                                   |                                                                     | United Kingdom of Great Britain and Northern Ireland (the) |
| Mackelprang, Becky         | PhD, Plant Biology                                     |                                                                     | United States of America (the)                             |
| Mackenzie, Roy             | Assistant professor                                    | Universidad de Magallanes                                           | Chile                                                      |
| MacKenzie, James           | Professor and Chair of Biological Sciences             | SUNY Oswego                                                         | United States of America (the)                             |
| MacKichan, Joanna          | Senior Lecturer in Microbiology                        | Victoria University of Wellington                                   | New Zealand                                                |
| Mackie, Shona              | Research Fellow, Physics                               | Department of Physics, University of Otago                          | New Zealand                                                |
| MacLeod, Rebecca           | Research Scientist                                     | Illumina Inc.                                                       | United States of America (the)                             |
| Maclin, Edward             | Instructor, Anthropology                               | University of Memphis                                               | United States of America (the)                             |
| MacNeill, Mia              | Ecology                                                | UC Davis                                                            | United States of America (the)                             |
| MacRae, Dan                | PhD Student, Marine Biology                            | University of Bristol                                               | United Kingdom of Great Britain and Northern Ireland (the) |
| Macreadie, Peter           | Associate Professor of Marine Science                  | Deakin University - Blue Carbon Lab                                 | Australia                                                  |
| Madanes, Nora              | Ecologist                                              | FCEy N. UBA                                                         | Argentina                                                  |
| Madar, Daniel              | Environmental Science implementation in the government | SP Interface                                                        | Israel                                                     |
| Madelaire, Carla           | Post doctoral researcher                               | University of Sao Paulo                                             | Brazil                                                     |
| Mader, Frederik            | General Medicine                                       | Gemeinschaftspraxis für Hausärztliche Versorgung                    | Germany                                                    |
| Madin, Elizabeth           | Assistant Professor, Marine Ecology                    | Hawai'i Institute of Marine Biology, University of Hawai'i at Manoa | United States of America (the)                             |
| Madin, Laurence            | Senior Science Advisor                                 | Woods Hole Oceanographic Institution                                | United States of America (the)                             |
| Madlener, Saskia           | Oceanography/Science Communicator                      | Oregon State University                                             | United States of America (the)                             |
| Madliger, Christine        | Post-doctoral Researcher; Conservation Physiology      | Carleton University                                                 | Canada                                                     |
| Madouasse, Aurélien        | Lecturer in veterinary epidemiology                    | Oniris - INRA                                                       | France                                                     |
| Madrigal, Javier           | Researcher                                             | INIA                                                                | Spain                                                      |
| Madritch, Mike             | Professor                                              | Appalachian State University                                        | United States of America (the)                             |
| Madsen, Kristine           | Associate Professor                                    | UC Berkeley                                                         | United States of America (the)                             |
| Mady, Rachael              | Graduate Student                                       | Cornell University                                                  | United States of America (the)                             |
| Madysa, Nico               | PhD student in physics                                 | TU Dresden                                                          | Germany                                                    |
| Maeda-Obregon, Alejandro   | Master's student in Biology                            | University College London                                           | United Kingdom of Great Britain and Northern Ireland (the) |

|                            |                                                                                                                                                                                                                                    |                                                                            |                                                            |
|----------------------------|------------------------------------------------------------------------------------------------------------------------------------------------------------------------------------------------------------------------------------|----------------------------------------------------------------------------|------------------------------------------------------------|
| Maehr, Tanja               | Postdoctoral Fellow in Wildlife Disease/Immunology/Zoology                                                                                                                                                                         | University of Surrey                                                       | United Kingdom of Great Britain and Northern Ireland (the) |
| Maeir, Aren                | Professor of Archaeology                                                                                                                                                                                                           | Bar-Ilan University                                                        | Israel                                                     |
| Maes, Tim                  | doctoral researcher                                                                                                                                                                                                                | KU Leuven                                                                  | Belgium                                                    |
| Maes, Alfons               | Professor Communication and Cognition                                                                                                                                                                                              | Tilburg University                                                         | Netherlands (the)                                          |
| Maestre, Fernando T.       | Distinguished Researcher, Ecology                                                                                                                                                                                                  | University of Alicante                                                     | Spain                                                      |
| Maffei, Fabio              | Post Doctoral researcher                                                                                                                                                                                                           | University of São Paulo State                                              | Brazil                                                     |
| Magalhães, Luísa           | Postdoctoral researcher in Biology and Ecology                                                                                                                                                                                     | University of Aveiro & CESAM                                               | Portugal                                                   |
| Magalhães, Célio           | Zoologist (Pesquisador Titular - retired)                                                                                                                                                                                          | Instituto Nacional de Pesquisas da Amazônia                                | Brazil                                                     |
| Magali, GERINO             | Professor                                                                                                                                                                                                                          | University Toulouse 3                                                      | France                                                     |
| Magallanes-Guijón, Gustavo | physicist and philosopher of science                                                                                                                                                                                               | UNAM                                                                       | Mexico                                                     |
| Magalli Henriques, Luiza   | Science and Technology Analyst                                                                                                                                                                                                     | INPA                                                                       | Brazil                                                     |
| Magalon, Helene            | Lecturer/ Marine Ecology                                                                                                                                                                                                           | Reunion Island University                                                  | Réunion                                                    |
| Magellan, Kit              | Research Professor                                                                                                                                                                                                                 | University of Battambang                                                   | Cambodia                                                   |
| Maggini, Ramona            | Researcher in spatial conservation planning under climate change                                                                                                                                                                   |                                                                            | Australia                                                  |
| Maggs, Christine Adair     | Honorary Professor, Biological Sciences                                                                                                                                                                                            | Queen's University Belfast                                                 | United Kingdom of Great Britain and Northern Ireland (the) |
| Magh, Ruth                 | PhD student                                                                                                                                                                                                                        | University of Freiburg                                                     | Germany                                                    |
| Maglio, Ivan Carlos        | Environment and Urban Planning                                                                                                                                                                                                     | IEA - USP. Global Cities Program                                           | Brazil                                                     |
| Magliozzo, Richard         | Executive Officer, PhD Program in Biochemistry                                                                                                                                                                                     | The Graduate Center CUNY                                                   | United States of America (the)                             |
| Magni, Carlo Alberto       | Associate Professor - Mathematics applied to economic decisions                                                                                                                                                                    | University of Modena and Reggio Emilia                                     | Italy                                                      |
| Magnúsdóttir, Edda         | Post doctoral fellow in marine biology                                                                                                                                                                                             | Department of Life and Environmental Sciences at the University of Iceland | Iceland                                                    |
| Magnússon, Eyjólfur        | Research Scientist                                                                                                                                                                                                                 | Institute of Earth Sciences, University of Iceland                         | Iceland                                                    |
| Magny, Michel              | Directeur de Recherche Classe Exceptionnelle Emérite                                                                                                                                                                               | CNRS, UMR 6249                                                             | France                                                     |
| Magrach, Ainhua            | Ikerbasque Research Fellow                                                                                                                                                                                                         | Basque Centre for Climate Change, BC3                                      | Spain                                                      |
| Magro, Ana                 | Lecturer /Marine Botany                                                                                                                                                                                                            | University of Cádiz                                                        | Spain                                                      |
| Mah, Thien-Fah             | Professor                                                                                                                                                                                                                          | University of Ottawa                                                       | Canada                                                     |
| Maharajh, Rasigan          | Political Economy                                                                                                                                                                                                                  | Institute for Economic Research on Innovation                              | South Africa                                               |
| Mahdavi, Ahmad             | Entomologist/ ecotoxicologist, ICT for agriculture and environment, Focal point for Mountain Partnership in the University of Tehran, CMS preventing poisoning group, RAMSAR, WWN, SWS/professor emeritus at University of Tehran. | University of Tehran/ and Sustainable agriculture and environment          | Iran (Islamic Republic of)                                 |
| Maher, Ray                 | Postdoctoral Research Fellow                                                                                                                                                                                                       | The University of Queensland                                               | Australia                                                  |
| Mahler, Bettina            | Independent Researcher                                                                                                                                                                                                             | Conicet                                                                    | Argentina                                                  |
| Mahmood, Mubasher          | consultant for ozone repair                                                                                                                                                                                                        | 21century edition a consulting media producer                              | United States of America (the)                             |
| Mahmoodi, Mohammad         | Assistant Professor, Plant Ecology                                                                                                                                                                                                 | Research Institute of Forests and Rangelands of Iran                       | Iran (Islamic Republic of)                                 |
| Mahoney, Cynthia           | Clinical Assoc Professor of Medicine (retired)                                                                                                                                                                                     | Retired. Stanford University School of Medicine                            | United States of America (the)                             |
| Mahony, Michael            | Professor                                                                                                                                                                                                                          | School of Environmental and Life Sciences                                  | Australia                                                  |

|                                          |                                                        |                                                                                          |                                                            |
|------------------------------------------|--------------------------------------------------------|------------------------------------------------------------------------------------------|------------------------------------------------------------|
| Mahran, Yossra                           | M.D.                                                   |                                                                                          | Germany                                                    |
| Mahsberg, Dieter                         | Zoology, Ecology                                       | Biocenter, University of Wuerzburg                                                       | Germany                                                    |
| Maia, Leonor                             | Professor                                              |                                                                                          | Brazil                                                     |
| Maia, Monique Rodrigues da Silva Andrade | Master                                                 | Inpa                                                                                     | Brazil                                                     |
| Maignan, Fabienne                        | Researcher - Land surfaces                             | LSCE/IPSL                                                                                | France                                                     |
| Maingon, Loys                            | Reasearch Director                                     | Strathcona Wilderness Institute                                                          | Canada                                                     |
| Mainguy, Gaell                           | Director of Development                                | Centre de Recherches Interdisciplinaires (CRI)                                           | France                                                     |
| Mainusch, Jakob                          | Forest Ecology                                         | Frontiers Media SA                                                                       | Switzerland                                                |
| Maiorano, Luigi                          | Assistant Professor                                    | University of Rome "La Sapienza"                                                         | Italy                                                      |
| Mair, Patrick                            | Senior Lecturer in Statistics                          | Harvard University                                                                       | United States of America (the)                             |
| maire, vincent                           | professor in plant-soil ecology                        | UQTR                                                                                     | Canada                                                     |
| Maires Hoppe, João Paulo                 | PhD Student                                            | UFES                                                                                     | Brazil                                                     |
| Maistrello, Lara                         | Associate Professor in General and Applied Entomology  | University od Modena and Reggio Emilia                                                   | Italy                                                      |
| Mâitre, Sylvie                           | medical doctor (allergology-immunology specialization) | own office (en français: cabinet médical)                                                | Switzerland                                                |
| MAJ, Stanislaw Paul                      | Academic                                               | Southern Cross University                                                                | Australia                                                  |
| Majcher, Małgorzata                      | Associate Professor                                    | UNIwersytet PRzyrodniczy w POZNANIU                                                      | Poland                                                     |
| Majerova, Eva                            | Postdoctoral researcher in coral biology               | Hawai'i Institute of Marine Biology                                                      | United States of America (the)                             |
| Majewska, Roksana                        | Marine biologist                                       | North-West University                                                                    | South Africa                                               |
| Majolo, Bonaventura                      | Reader                                                 | University of Lincoln                                                                    | United Kingdom of Great Britain and Northern Ireland (the) |
| Makena, Maryanne                         | Biology of conservation                                | The University of Nairobi                                                                | Kenya                                                      |
| Mäki, Mari                               |                                                        | Institute for Atmospheric and Earth System Research / Forest Sciences, Helsinki, Finland | Finland                                                    |
| Makkonen, Ulla                           | Seneior Reseach Scientist                              | Finnish Meteorological Institute                                                         | Finland                                                    |
| MALABAD, Abdoulaye Mahamat               | PhD Student Biology                                    | Laboratoire Chrono-Environnement UMR 6249 CNRS UBFC                                      | Chad                                                       |
| Malai, Doina                             | Scientific Advisor                                     | INSPQ                                                                                    | Canada                                                     |
| Malay, Machel                            |                                                        | University of the Philippines                                                            | Philippines (the)                                          |
| Malbet, Fabien                           | Directeur de Recherche CNRS in Astrophysics            | Université Grenoble Alpes / IPAG                                                         | France                                                     |
| Maldonado, Ernesto                       | Principal Investigator                                 | National University of Mexico (UNAM)                                                     | Mexico                                                     |
| Maldonado, Victoria                      | Professor, Astronomy                                   | Observatorio Astronómico de Córdoba, UNC                                                 | Argentina                                                  |
| Malej, Milan                             | Independent environmental researcher and writer        |                                                                                          | Slovenia                                                   |
| Malej, Alenka                            | marine biologist, retired                              | Marine Biology Station Piran, NIB                                                        | Slovenia                                                   |
| Malek, Žiga                              | Assistant Professor                                    | Institute for Environmental Studies (IVM), Vrije Universiteit Amsterdam                  | Netherlands (the)                                          |
| Malfait, Nicole                          | neuroscience researcher                                | CNRS                                                                                     | France                                                     |
| Malgosa, Assumpció                       | Full professor, Physical Anthropology                  | Universitat Autònoma de Barcelona                                                        | Spain                                                      |
| Malik, ABOUBACAR ABDOULAYE               | Renewable energy and Energy efficiency Engineer        | International Institute of Water and Environment Engineering                             | Burkina Faso                                               |

|                          |                                                       |                                                           |                                                            |
|--------------------------|-------------------------------------------------------|-----------------------------------------------------------|------------------------------------------------------------|
| Malik, Faheem            | Associate lecturer                                    | Northumbria University                                    | United Kingdom of Great Britain and Northern Ireland (the) |
| Malinka, Chloe           | PhD Fellow in bioacoustics                            | Aarhus University                                         | Denmark                                                    |
| Malinowska, Agata        | Proteomics                                            | IBB PAS                                                   | Poland                                                     |
| Malinowski, Szymon       | professor, atmospheric physics                        | University of Warsaw                                      | Poland                                                     |
| Máliš, František         | Assistant Professor                                   | Technical University in Zvolen, Faculty of Forestry       | Slovakia                                                   |
| Malizia, Agustina        | Ecóloga, Investigadora del CONICET                    | Instituto de Ecología Regional (CONICET-UNT)              | Argentina                                                  |
| Maljean-Dubois, Sandrine | Researcher                                            | CNRS                                                      | France                                                     |
| Mallet, Christophe       | Functional Morphology PhD student                     | Muséum National d'Histoire Naturelle, Paris               | France                                                     |
| Mallozzi, Michael        | Research Associate                                    | University of Arizona                                     | United States of America (the)                             |
| Malo Larrea, Antonio     | Professor in Ecological Economics                     | Universidad Católica de Cuenca                            | Ecuador                                                    |
| Malone, James            | environmental economics and science                   | University of ayork                                       | United Kingdom of Great Britain and Northern Ireland (the) |
| Malone, Melanie          | Professor                                             |                                                           | United States of America (the)                             |
| Malone, Delia            | Ecologist                                             | Colorado Natural Heritage Program                         | United States of America (the)                             |
| Malone, Elizabeth L      | Sociology                                             | Pacific Northwest National Laboratory                     | United States of America (the)                             |
| Malta, Erik-jan          | Project manager / marine ecologist                    | CTAQUA                                                    | Spain                                                      |
| Maluche, Susanne         | PhD biology                                           | Medical University Munich                                 | Germany                                                    |
| Malvy, Denis JM          | Professor of Infectious diseases                      | INSERM, University of Bordeaux                            | France                                                     |
| Malzacher, Peter         | Physcs                                                | GSI                                                       | Germany                                                    |
| Mamedova, Yuna           | Phd student                                           | Institute of Landscape Ecology SAS                        | Slovakia                                                   |
| Mammola, Stefano         | PostDoc, Ecology and Subterranean Biology             | University of Torino                                      | Italy                                                      |
| Mamouridis, Valeria      | Biologist                                             | Unemployed                                                | Italy                                                      |
| Man, Jarrett             | Plant biologist                                       | University of Massachusetts Amherst                       | United States of America (the)                             |
| Mančal, Tomáš            | Assistant professor, Physics                          | Charles University                                        | Czech Republic (the)                                       |
| Mancheño, Jose M.        | Staff scientist. Molecular Biology                    |                                                           | Spain                                                      |
| Mancinelli, Riccardo     | PhD                                                   | University of Leiden                                      | Netherlands (the)                                          |
| Mancini, Matheus         | Post doctoral student in Applied Ecology              | Federal University of Lavras                              | Brazil                                                     |
| Mancuso, Jasmine         | Biology Aquatic Science Graduate Student              | Grand Valley State University                             | United States of America (the)                             |
| Mancuso, Kristen         | PhD Candidate - Biology                               | University of British Columbia Okanagan                   | Canada                                                     |
| Mandoki, Katya           | Professor of aesthetics, semiotics, theory of culture | Universidad Autónoma Metropolitana                        | Mexico                                                     |
| Mandrioli, Mauro         | Associate Professor in genetics                       | Università di Modena e Reggio EMilia                      | Italy                                                      |
| Manelli, Luca            | PhD Student                                           | University of Winchester                                  | United Kingdom of Great Britain and Northern Ireland (the) |
| Manenti, Raoul           | Zoologist                                             | Università degli Studi di Milano                          | Italy                                                      |
| Maner, Jenny             | Research assistant                                    | Swiss Federal Institute of Aquatic Science and Technology | Switzerland                                                |
| Maneyro, Raúl            | Herpetologist                                         | Facultad de Ciencias. Universidad de la Republica         | Uruguay                                                    |
| Mangan, Mary             | Biology                                               | OpenHelix                                                 | United States of America (the)                             |
| Manghi, Manoel           | Physics                                               | Toulouse University                                       | France                                                     |
| Mangilli, Anna           | Astrophysics                                          | IRAP                                                      | France                                                     |

|                           |                                                                      |                                                                                               |                                |
|---------------------------|----------------------------------------------------------------------|-----------------------------------------------------------------------------------------------|--------------------------------|
| Manguette, Marie          | Biologist, PhD student                                               | Max Planck Institute for Evolutionary Anthropology                                            | Germany                        |
| Manhães, Adriana          | PhD in Ecology                                                       | University of Rio Grande do Norte                                                             | Brazil                         |
| Manies, Kristen           | Ecologist                                                            |                                                                                               | United States of America (the) |
| Maniuk, Vadym             | associate professor, PhD in ecology                                  | Oles Honchar Dnipro National University                                                       | Ukraine                        |
| Mankasingh, Utra          | Soils                                                                | University of Iceland                                                                         | Iceland                        |
| Mann, Judy                | Conservation Strategist                                              | SAAMBR                                                                                        | South Africa                   |
| MANN, BRUCE QUINTIN       | Senior scientist                                                     | South African Association for Marine Biological Research                                      | South Africa                   |
| Manninen, Juha            | Prof. emer.                                                          | Dept of History                                                                               | Finland                        |
| Manning, I.P.A.           | Wildlife Biologist                                                   |                                                                                               | Canada                         |
| MANNING, Edward           | President Geographer Sustainable Development specialist              | TOURISK INC                                                                                   | Canada                         |
| Mannocci, Laura           | postdoctoral researcher                                              | IRD                                                                                           | France                         |
| Manoj, Narayanan          | Associate Professor                                                  | Indian Institute of Technology Madras                                                         | India                          |
| Manon, Latour             | Ecologist                                                            | National Museum of Natural History (Paris)                                                    | France                         |
| Mantilla-Meluk, Hugo      | Biology                                                              | Center for Highland Studies (Centro de Estudios de Alta Montaña CEAM) Universidad del Quindío | Colombia                       |
| Mäntylä, Elina            | Research scientist, ecology                                          | Biology Centre of the Czech Academy of Sciences                                               | Czech Republic (the)           |
| Manzanedo, Rubén          | Postdoctoral researcher. Forest ecology                              | Harvard University                                                                            | United States of America (the) |
| Manzanilla, Silvia        | Marine mammal ecology                                                | UNAM                                                                                          | Mexico                         |
| Manzano, Pablo            | Ecology                                                              | University of Helsinki                                                                        | Finland                        |
| Manzatto, Angelo Gilberto | PhD in ecology                                                       | Federal University official Rondônia - Unir                                                   | Brazil                         |
| Manzi, Florent            | Doctoral student in Biology                                          | Leibniz-Institute of Freshwater Ecology and Inland Fisheries                                  | Germany                        |
| Mappes, Johanna           | Academy professor                                                    | University of Jyväskylä                                                                       | Finland                        |
| Mapurunga, Eduardo        | PhD student                                                          | Federal University of Rio Grande do Sul                                                       | Brazil                         |
| Marabuto, Eduardo         | PhD student Evolutionary biology                                     | Faculty of Sciences, University of Lisbon                                                     | Portugal                       |
| Marais, Gabriel           | CNRS Senior Investigator, Biology                                    | Univ. Lyon 1                                                                                  | France                         |
| Maranhão, Louise          | Veterinária                                                          | Faculdade de Medicina Veterinária e Zootecnia/Universidade de São Paulo                       | Brazil                         |
| Marano, Gina              | PhD in Sustainable Forestry, University of Naples Federico II' Italy |                                                                                               | Italy                          |
| Marañón, Teodoro          | Researcher on Forest Ecology                                         | IRNAS, CSIC                                                                                   | Spain                          |
| Marañón Jiménez, Sara     | Postdoctoral research associate                                      | CREAF                                                                                         | Spain                          |
| Marasco, Valeria          | Post-doctoral fellow                                                 | Mrs                                                                                           | Austria                        |
| Marçais, Benoit           | Forest pathology                                                     | INRA                                                                                          | France                         |
| Marcatti, Carmen          | Associate Professor                                                  | UNESP                                                                                         | Brazil                         |
| Marcé, Rafael             | Research Scientist                                                   | Catalan Institute for Water Research (ICRA)                                                   | Spain                          |
| Marcé-Nogué, Jordi        | Research Scientist                                                   | University at Buffalo, the State University of New York                                       | United States of America (the) |
| Marcec-Greaves, Ruth      | National Amphibian Conservation Center-Director                      | Detroit Zoological Society                                                                    | United States of America (the) |
| Marcel, Grégoire          | Astrophysicist                                                       | Villanova University                                                                          | United States of America (the) |
| Marcelino, Joana          | PhD Candidate                                                        | University of Lisbon                                                                          | Portugal                       |

|                              |                                                                                                    |                                                                                            |                                                            |
|------------------------------|----------------------------------------------------------------------------------------------------|--------------------------------------------------------------------------------------------|------------------------------------------------------------|
| Marcellini, Sylvain          | Professor                                                                                          | Universidad de Concepcion                                                                  | Chile                                                      |
| march, jaume                 | Agragate professor                                                                                 | Universitat de Lleida                                                                      | Spain                                                      |
| March, Rosaleen              | Landscape Ecologist                                                                                | Leiden University                                                                          | Netherlands (the)                                          |
| MARCHADIER, Elodie           | Assistant professor                                                                                | Université Paris Sud                                                                       | France                                                     |
| Marchant, Robert             | Professor of Tropical Ecology                                                                      | University of York                                                                         | United Kingdom of Great Britain and Northern Ireland (the) |
| Marchante, Elizabete         | Researcher                                                                                         | Centre for Functional Ecology,University of Coimbra                                        | Portugal                                                   |
| Marchaudon, Aurélie          | Researcher                                                                                         | IRAP/CNRS                                                                                  | France                                                     |
| Marchel, James               | PhD Experimental Psychology                                                                        | UNIVERSITY OF UTAH (retired)                                                               | United States of America (the)                             |
| Marchetta, Philine           | PhD student Neuroscience                                                                           | Molecular Physiology of Hearing, Tübingen                                                  | Germany                                                    |
| Marchetti, Michael           | Fletcher Jones Professor of Ecology                                                                | St Marys College of California                                                             | United States of America (the)                             |
| Marchi, Maurizio             | Researcher On Fixed-Term Contract on <a href="http://b4est.eu/project">http://b4est.eu/project</a> | CREA - Research Centre for Forestry and Wood                                               | Italy                                                      |
| Marchildon, Louis            | Emeritus Professor of Physics                                                                      | Universite du Quebec (Trois-Rivieres)                                                      | Canada                                                     |
| Marchiol, Luca               | Associate Professor in Agronomy & Crop Science                                                     | University of Udine                                                                        | Italy                                                      |
| Marchioni, Andrea            | PhD Candidate in Labour, Development, and Innovation                                               | University of Modena and Reggio Emilia                                                     | Italy                                                      |
| Marcinko, Kelsey             | PhD Candidate, Applied Mathematics (Mathematical Ecology)                                          | University of Washington                                                                   | United States of America (the)                             |
| Marcisz, Katarzyna           | Postdoc                                                                                            | Adam Mickiewicz University                                                                 | Poland                                                     |
| Marcolin, Fabio              | Research assistant                                                                                 | MTA Centre for Ecological Research                                                         | Hungary                                                    |
| Marcon, Eric                 | Researcher                                                                                         | AgroParisTech, UMR EcoFoG                                                                  | France                                                     |
| Marcos, Magalí               | Researcher                                                                                         | IPEEC, CONICET                                                                             | Argentina                                                  |
| Marcos-García, Maria Angeles | Professor of Zoology                                                                               | Research Institute CIBIO (Centro Iberoamericano de la Biodiversidad), Univerty of Alicante | Spain                                                      |
| Marcoux, Julien              | Research Associate                                                                                 | Centre National de Recherche Scientifique (CNRS)                                           | France                                                     |
| Marcq, Emmanuel              | Associate Professor, Planetary Science                                                             | LATMOS, Université Paris-Saclay                                                            | France                                                     |
| Maréchal, Alexandre          | Adjunct Professor of Biology                                                                       | Université de Sherbrooke                                                                   | Canada                                                     |
| Marengo, Jose                | Research An Development Directot                                                                   | CEMADEN                                                                                    | Brazil                                                     |
| Mares, Constantin            | Senior scientist                                                                                   | Institute of Geodynamics, Romanian Academy                                                 | Romania                                                    |
| Mares, Ileana                | Senior scientist                                                                                   | Institute of Geodynamics, ile Romanian Academy                                             | Romania                                                    |
| Marescot, Lucile             | Postdoc conservation biology and biostatistics                                                     | Center of Functional and Evolutionary Ecology CNRS Montpellier                             | France                                                     |
| Maresh, Jennifer             | Professor of Biology                                                                               | West Chester University                                                                    | United States of America (the)                             |
| Margalida, Antoni            | Senior scientist                                                                                   | Institute for Game and Wildlife Research                                                   | Spain                                                      |
| Margaritis, Konstantinos     | Professor of Informatics                                                                           | University of Macedonia                                                                    | Greece                                                     |
| Margenstern, Maurice         | professor emeritus in computer science                                                             | Université de Lorraine                                                                     | France                                                     |
| Marggraf, Lara               | Biologist                                                                                          | Leibniz Institute for Zoo & Wildlife Research                                              | Germany                                                    |
| Marghetis, Tyler             | Cognitive Science                                                                                  | Santa Fe Institute                                                                         | United States of America (the)                             |
| Margirier, Félix             | Oceanographer                                                                                      | LOCEAN                                                                                     | France                                                     |
| Maria, Ana                   | physician (general practitioner)                                                                   | Regional Health Administration of Lisbon and Tagus Valley                                  | Portugal                                                   |

|                               |                                                                                              |                                                                        |                                                            |
|-------------------------------|----------------------------------------------------------------------------------------------|------------------------------------------------------------------------|------------------------------------------------------------|
| Maria, Ana Rita de            | physician                                                                                    | Regional Health Administration of Lisbon and Tagus Valley              | Portugal                                                   |
| Maria, Lisa                   | Ecologist/Environmental Scientist                                                            | Government                                                             | New Zealand                                                |
| María Mar, Areco              | PhD Researcher CONICET and assistant profesor Universidad Nacional de San Martin. Biologist. | CONICET-UNSAM                                                          | Argentina                                                  |
| Mariano, Vanessa              | PhD Candidate in Ecology and Natural Resources                                               |                                                                        | Brazil                                                     |
| Mariano-Neto, Eduardo         | Full Professor - Ecology                                                                     | Federal University of Bahia                                            | Brazil                                                     |
| Marichal, Raphael             | Researcher                                                                                   | CIRAD                                                                  | France                                                     |
| Marie, Amandine               | Research Fellow                                                                              | INR                                                                    | France                                                     |
| Marie, Hrabanski              | researcher environmental policy                                                              | CIRAD                                                                  | France                                                     |
| Marie-Claire, Pierret         | Professor assistant                                                                          | Strasbourg University                                                  | France                                                     |
| Marie-Orleach, Lucas          | Postdoctoral researcher in Evolutionary Biology                                              | University of Oslo                                                     | Norway                                                     |
| Mariette, Stéphanie           | Scientist ecology&evolution                                                                  | INRA                                                                   | France                                                     |
| Mariette, Mylene              | Behavioural Ecology                                                                          | Deakin University                                                      | Australia                                                  |
| Marin, Maxime                 | Post graduate student                                                                        | University of Tasmania                                                 | Australia                                                  |
| Marin da Fonte, Luis Fernando | Biologist / Conservationist                                                                  | IUCN SSC Amphibian Specialist Group / Amphibian Survival Alliance      | Brazil                                                     |
| Marin Menendez, Alejandro     | Postdoc Genomics                                                                             | Wellcome Sanger Institute                                              | United Kingdom of Great Britain and Northern Ireland (the) |
| MARIN OJEDA, GRISELDA         | BOTANY PROFESSOR/MSC ON CONSERVATION BIOLOGY                                                 | FACULTAD DE CIENCIAS EXACTAS Y NATURALES UNA                           | Paraguay                                                   |
| Marin-Beltran, Isabel         | Researcher (Biogeochemistry)                                                                 | Centro de Ciências do Mar do Algarve                                   | Portugal                                                   |
| Marin-Guirao, Lazaro          | Researcher                                                                                   | Spanish Institute of Oceanography                                      | Spain                                                      |
| Marina, Antongiovanni         | Environment Sub-Coordinator                                                                  | Secretaria de Meio Ambiente e Recursos Hídricos do Rio Grande do Norte | Brazil                                                     |
| Marinach, Carine              | Research Engineer, microbiology                                                              | Sorbonne-Université                                                    | France                                                     |
| Marincola, Gabriella          | Microbiologist / PostDoc                                                                     | University of Würzburg                                                 | Germany                                                    |
| Maringer, Franz Josef         | Professor Applied Physics                                                                    | University of Natural Resources and Life Sciences Vienna               | Austria                                                    |
| Marinho-Filho, Jader          | Professor of Zoology                                                                         | Universidade de Brasília                                               | Brazil                                                     |
| Marini, Miguel Ângelo         | Zoology Professor                                                                            | Universidade de Brasília                                               | Brazil                                                     |
| Marino, Filippo               | PhD research student                                                                         | University of Exeter                                                   | United Kingdom of Great Britain and Northern Ireland (the) |
| Mariño, Mónica                | Marine Ecology                                                                               | Leibniz Centre for Tropical Marine Research                            | Germany                                                    |
| Marion, Jeffrey               | Research Biologist & Adjunct Professor, Virginia Tech                                        | U.S. Geological Survey                                                 | United States of America (the)                             |
| Marjakangas, Emma-Liina       |                                                                                              | Norwegian University of Science and Technology                         | Norway                                                     |
| Mark Welch, David             | Senior Scientist                                                                             | Marine Biological Laboratory                                           | United States of America (the)                             |
| Mark, FRSNZ, Sir Alan         | Emeritus Professor                                                                           | University of Otago                                                    | New Zealand                                                |
| Markesteijn, Lars             | Lecturer in Forest Sciences                                                                  | Bangor University                                                      | United Kingdom of Great Britain and Northern Ireland (the) |
| Markham, Virginia             | Plant genetics                                                                               | UC Berkeley                                                            | United States of America (the)                             |
| Märki, Kathi                  | Biologist                                                                                    | SWILD                                                                  | Switzerland                                                |

|                           |                                                        |                                                                                        |                                                            |
|---------------------------|--------------------------------------------------------|----------------------------------------------------------------------------------------|------------------------------------------------------------|
| Marklund, Maria           | Ecologist                                              | University of Adelaide                                                                 | Australia                                                  |
| Marko, Balint             | Professor                                              | Babes-Bolyai University                                                                | Romania                                                    |
| Marko, Peter              | Associate Professor of Life Sciences                   | University of Hawaii at Manoa                                                          | United States of America (the)                             |
| Markones, Nele            | Marine Ecologist                                       | University of Kiel                                                                     | Germany                                                    |
| Marks, Sara               | Research Scientist                                     | Eawag / Sandec                                                                         | Switzerland                                                |
| Marks Marino, Dara        | Research Specialist                                    |                                                                                        | United States of America (the)                             |
| Marletta, Michael         | Professor of Chemistry and Biochemistry                | University of California, Berkeley                                                     | United States of America (the)                             |
| Marmontel, Miriam         | Wildlife researcher                                    | Instituto de Desenvolvimento Sustentável Mamirauá                                      | Brazil                                                     |
| Marmottant, Philippe      | Physics                                                | CNRS                                                                                   | France                                                     |
| Marneweck, Courtney       | PhD Ecology                                            |                                                                                        | South Africa                                               |
| Marolla, Filippo          | PhD student in Ecology                                 | UiT The Arctic University of Norway                                                    | Norway                                                     |
| Marone, Eduardo           | Full Professor                                         | Center for Marine Studies - UFPR - Visiting UNCuyo                                     | Brazil                                                     |
| Marquardt, William        | Curator and Professor, retired                         | Florida Museum of Natural History, University of Florida                               | United States of America (the)                             |
| Marquardt, Kristina       | Researcher in Rural development                        | Department of Urban and Rural Development, Swedish University of Agricultural Sciences | Sweden                                                     |
| Marque, Clémence          | Pharmacist                                             | Independant                                                                            | France                                                     |
| marquer, veronique        | manager                                                | FTV                                                                                    | France                                                     |
| MARQUER, Didier           | Professor / Geosciences                                | Université Bourgogne Franche-Comté                                                     | France                                                     |
| Marques, J. Tiago         | Researcher                                             | Universidade de Évora                                                                  | Portugal                                                   |
| Marques, Tiago            | Senior Research Fellow                                 | University of St Andrews                                                               | United Kingdom of Great Britain and Northern Ireland (the) |
| Marques, Antonio C        | Professor, Marine Biodiversity & Evolution             | University of São Paulo                                                                | Brazil                                                     |
| Marques, Marcia           | Professor                                              | Federal University of Parana                                                           | Brazil                                                     |
| Marques, Luiz             | Professor                                              | State University of Campinas Unicamp                                                   | Brazil                                                     |
| Marques, Isabel           |                                                        | University of Lisbon                                                                   | Portugal                                                   |
| Marques, Ana Teresa       | PhD student - Ecology                                  | Universidade de Lisboa                                                                 | Portugal                                                   |
| MARQUES, Fernando         | Director                                               | AdP - Águas de Portugal                                                                | Portugal                                                   |
| Marquet, Pablo            | Professor of Ecology                                   | Pontificia UNiversidad Catolica de Chile                                               | Chile                                                      |
| Marquez, Javier Andrés    | Doctor en Ciencias Biológicas                          | Universidad Nacional de Rio Cuarto                                                     | Argentina                                                  |
| Marquez Arroyo, José Luis | Civil Engineer - Water Specialist                      | Environment and Water Agency of Andalusia                                              | Spain                                                      |
| Marquinez, Jorge          | professor, Head of Indurot                             | Indurot, University of Oviedo                                                          | Spain                                                      |
| Marr, Susanne             | PhD Student Ecophysiology/Eco-Metabolomics             | German Centre for Integrative Biodiversity Research (iDiv)                             | Germany                                                    |
| Marra-Biggs, Paolo        | Marine Biologist                                       | University of Hawaii: Manoa                                                            | United States of America (the)                             |
| Marrec, Ronan             | Assistant Professor in Ecology                         | Université de Picardie Jules Verne                                                     | France                                                     |
| Marrón, Aurora            | Ph.D. student                                          | Universidad Nacional Autónoma de México                                                | Mexico                                                     |
| Marschner, Matthias       | Medical doctor                                         | Sankt Gertrauden Hospital Berlin                                                       | Germany                                                    |
| Marsden, Janet            | Sustainability Science and systems                     | Syracuse University                                                                    | United States of America (the)                             |
| Marsden-Ballard, Danielle | Social Ecologist & Climate Change Science Communicator | Sacred Earth Institute                                                                 | Australia                                                  |
| Marsh, Andrew             | Measurement and Standards Scientist                    | NextEra Analytics                                                                      | United States of America (the)                             |

|                         |                                                                   |                                                                             |                                                            |
|-------------------------|-------------------------------------------------------------------|-----------------------------------------------------------------------------|------------------------------------------------------------|
| Marsh, Helene           | Emeritus Professor of Environmental Science                       | James Cook University                                                       | Australia                                                  |
| Marsh, Anke             | Researcher in Palaeoecology                                       | Institute of Archaeology, University College London                         | United Kingdom of Great Britain and Northern Ireland (the) |
| Marshall, Vic           | Retired Biology Professor                                         | Jackson College                                                             | United States of America (the)                             |
| Marshall, Justin        | Prof in Marine Biology and Neuroscience                           | University of Queensland                                                    | Australia                                                  |
| Marshall, Andrew Robert | Associate Professor                                               | University of the Sunshine Coast, University of York and Flamingo Land Ltd. | Australia                                                  |
| Marshall, Benjamin      | Ecologist                                                         | Suranaree University of Technology                                          | Thailand                                                   |
| Marshall, Victor        | Retired Biology Professor                                         | Jackson College Michigan                                                    | United States of America (the)                             |
| Marsham, John           | Associate Professor, Weather and Climate Science                  | University of Leeds and National Centre for Atmospheric Science             | United Kingdom of Great Britain and Northern Ireland (the) |
| Marsico, Travis         | Professor and Curator, Arkansas State University Herbarium (STAR) | Arkansas State University                                                   | United States of America (the)                             |
| Marston, Richard        | University Distinguished Professor Emeritus                       | Kansas State University                                                     | United States of America (the)                             |
| martel, an              | Prof.                                                             | ghent university                                                            | Belgium                                                    |
| Martel, Antera          | Curator                                                           | Spanish Bank of Algae - BEA University of Las Palmas de GC                  | Spain                                                      |
| Martel, Jocelyn         | Associate Professor of Biology                                    | York University                                                             | Canada                                                     |
| Martens, Carola         | PhD student                                                       | Goethe University Frankfurt                                                 | Germany                                                    |
| Martens, Jan            | Trained Surgeon, Emergency- and Intensive Care Medicine           | Asklepios Kliniken Hamburg                                                  | Germany                                                    |
| Martens, Koen           | Head of Research                                                  | Royal Belgian Institute of natural Sciences                                 | Belgium                                                    |
| Martí, Eugènia          | Permanent staff researcher                                        | Centre d'estudis Avançats de Blanes (CEAB-CSIC)                             | Spain                                                      |
| Martí Rodrigo, Pablo    | Medical doctor. Ophthalmologist                                   | Hospital del Mar Barcelona                                                  | Spain                                                      |
| Martignier, Thomas      | PhD student Biology                                               | University of Lausanne                                                      | Switzerland                                                |
| Martin, Harry           | scientist / biological chemistry                                  | Plant and Food Research                                                     | New Zealand                                                |
| Martin, Gabrielle       | Post-doctoral fellow in ecology                                   | IMBE                                                                        | France                                                     |
| Martin, Christophe      | Researcher, Materials Science                                     | CNRS, Univ. Grenoble Alpes                                                  | France                                                     |
| Martin, Manuel          | Research engineer                                                 | INRA                                                                        | France                                                     |
| Martin, Maximilian      | PhD student in Nutrition Science                                  | Leibniz-Institut für Gemüse- und Zierpflanzenbau (IGZ)                      | Germany                                                    |
| Martin, Freddie         | PhD Candidate                                                     | University of Bristol                                                       | United Kingdom of Great Britain and Northern Ireland (the) |
| Martin, John            | Honorary Lecturer                                                 | UNSW                                                                        | Australia                                                  |
| Martin, Ryan            | Professor of Biology                                              | Case Western Reserve University                                             | United States of America (the)                             |
| Martin, John H          | Physics                                                           |                                                                             | Canada                                                     |
| Martin, Jeff            | Ecology & Evolutionary Biology                                    | University of TN                                                            | United States of America (the)                             |
| Martin, Emily A.        | Postdoc                                                           | University of Wuerzburg                                                     | Germany                                                    |
| Martin, Peter           | Professor, Theoretical Astrophysics                               | University of Toronto                                                       | Canada                                                     |
| Martin, Meghan          | Director                                                          | PDXWildlife                                                                 | United States of America (the)                             |
| Martin, Marion          | Retired environmental scientist                                   |                                                                             | United Kingdom of Great Britain and Northern Ireland (the) |

|                             |                                                                                                        |                                                                                                                                        |                                                            |
|-----------------------------|--------------------------------------------------------------------------------------------------------|----------------------------------------------------------------------------------------------------------------------------------------|------------------------------------------------------------|
| Martin, Jake                | PhD candidate                                                                                          | Monash University                                                                                                                      | Australia                                                  |
| Martin, Jean-Louis          | Senior Scientist, Ecology                                                                              | CNRS, Montpellier France                                                                                                               | France                                                     |
| Martin, Olivier             | Research Scientist, Genetics                                                                           | Institut National de la Recherche Agronomique                                                                                          | France                                                     |
| Martin, Rowan               | Climate change biology                                                                                 | University of Cape Town                                                                                                                | South Africa                                               |
| Martin, François-Marie      | Ph.D in ecology                                                                                        | Irstea                                                                                                                                 | France                                                     |
| Martin, Nicolas             | researcher forest ecology                                                                              | INRA                                                                                                                                   | France                                                     |
| Martin, Gina                | Postdoctoral Associate                                                                                 | Western University                                                                                                                     | Canada                                                     |
| Martin, Thibaud             | entomologist agroecologist                                                                             | Cirad                                                                                                                                  | Côte d'Ivoire                                              |
| Martin, Verene              | Renewable Energy Forecasting Analyst, Data Scientist                                                   |                                                                                                                                        | United States of America (the)                             |
| MARTIN, MEGHAN              | Director                                                                                               | PDXWildlife                                                                                                                            | United States of America (the)                             |
| Martín, Carlos Alfonso      | Profesor - Zoology                                                                                     | Complutense University of Madrid                                                                                                       | Spain                                                      |
| Martín, Ana                 | Forest engineer. Forest pathology.                                                                     | Regional Forest Service.                                                                                                               | Spain                                                      |
| Martín, María P.            | Scientific Researcher                                                                                  | Real Jardín Botánico-CSIC                                                                                                              | Spain                                                      |
| Martin Duque, Jose F        | Senior Lecturer                                                                                        | Complutense University of Madrid                                                                                                       | Spain                                                      |
| Martín Esquivel, Jose Luis  | Head of Nature Conservation                                                                            | National Park of Teide - Canary Island Government                                                                                      | Spain                                                      |
| MARTIN GONZALEZ, Ana        | Postdoctoral researcher in Ecology                                                                     | University of Copenhagen                                                                                                               | Denmark                                                    |
| Martín López, Lucía Martina | Postdoctoral research in marine mammal science                                                         | SMRU, Sea Mammal Research Unit, University of St. Andrews                                                                              | Spain                                                      |
| Martín-Forés, Irene         | PostDoc position                                                                                       | Department of Biogeography and Global Change, National Museum of Natural Sciences, Spanish Council for Scientific Research (MNCN-CSIC) | Spain                                                      |
| Martín-Gamboa, Mario        | Postdoctoral researcher                                                                                | University of Aveiro                                                                                                                   | Portugal                                                   |
| martin-jezequel, veronique  | researcher marine biology                                                                              | CNRS                                                                                                                                   | France                                                     |
| MARTIN-PREVEL, YVES         | Epidemiologist in Public Health Nutrition / Director of the Health and Societies Department of the IRD | IRD (The French National research Institute for Sustainable Development)                                                               | France                                                     |
| Martina, Jason              | Assistant Professor of Wetland Ecology                                                                 | Texas State University                                                                                                                 | United States of America (the)                             |
| Martinez, Mathieu           | Assitant professor in Earth Sciences                                                                   | Géosciences Rennes, Université de Rennes 1                                                                                             | France                                                     |
| Martinez, Cristina          | Associate Professor in Physics                                                                         | Universidad Complutense de Madrid                                                                                                      | Spain                                                      |
| Martinez, Pablo A.          | Professor/Researcher Biology                                                                           | Universidad Nacional de Mar del Plata                                                                                                  | Argentina                                                  |
| Martinez, Nicolas           | PhD Student                                                                                            | Museo Nacional de Historia Natural del Paraguay                                                                                        | Paraguay                                                   |
| Martinez, Virginia          | Professor Biologist                                                                                    | Universidad Nacional de Salta                                                                                                          | Argentina                                                  |
| Martinez, Patrick           | Professor of Mathematics                                                                               | University Toulouse 3                                                                                                                  | France                                                     |
| Martinez, Julien            | Postdoctoral fellow                                                                                    | University of Glasgow                                                                                                                  | United Kingdom of Great Britain and Northern Ireland (the) |
| Martinez, Celia             | researcher                                                                                             | CETEMAS                                                                                                                                | Spain                                                      |
| Martinez, Hector            | Professor of Astronomy                                                                                 | Observatorio Astronomico, Universidad Nacional de Cordoba                                                                              | Argentina                                                  |
| Martinez, Maria             | Director of Research                                                                                   | INSERM                                                                                                                                 | France                                                     |
| Martínez, Brezo             | Associate Professor in Marine Ecology                                                                  | Universidad Rey Juan Carlos                                                                                                            | Spain                                                      |
| Martínez, Joaquín           | Sociologist                                                                                            |                                                                                                                                        | Ecuador                                                    |
| Martínez, Paloma            | PhD student                                                                                            | Mrs.                                                                                                                                   | Spain                                                      |
| Martínez, Virginia          | Professor                                                                                              | IBIGEO - Universidad Nacional de Salta                                                                                                 | Argentina                                                  |

|                                   |                                                                                                     |                                                                                                                                                                                                 |                                                            |
|-----------------------------------|-----------------------------------------------------------------------------------------------------|-------------------------------------------------------------------------------------------------------------------------------------------------------------------------------------------------|------------------------------------------------------------|
| Martínez Adriano, Cristian Adrian | Postdoctoral position                                                                               | Facultad de Ciencias Forestales-UANL                                                                                                                                                            | Mexico                                                     |
| Martinez Almoyna, Camille         | Ecology                                                                                             | LECA                                                                                                                                                                                            | France                                                     |
| Martinez Arias, Alfonso           | Professor                                                                                           | Department of Genetics, University of Cambridge                                                                                                                                                 | United Kingdom of Great Britain and Northern Ireland (the) |
| Martínez Carretero, Eduardo       | Curator of the Ruiz Laeal (MERL) Herbarium- Director Geobotany and Phytogeography researching group | Instituto Argentino de Investigaciones de las Zonas Áridas (IADIZA)-Consejo Nacional de Investigaciones Científicas y Técnicas (CONICET) / Fac. Cs. Ex. F. Nat. National University of San Juan | Argentina                                                  |
| Martínez de Alba, Ángel Emilio    | Researcher in Plant Science                                                                         | Spanish-Portuguese Agricultural Research Centre (CIALE)                                                                                                                                         | Spain                                                      |
| MARTINEZ DE LA VEGA, ALVARO       | GENERAL DIRECTOR                                                                                    | PAIS XXI FOUNDATION                                                                                                                                                                             | Colombia                                                   |
| Martinez del Rio, Carlos          | Professor, Ecological Physiology                                                                    | University of Wyoming                                                                                                                                                                           | United States of America (the)                             |
| Martínez Fontaine, Consuelo       | PhD candidate Earth Sciences                                                                        | Université Paris-Saclay                                                                                                                                                                         | France                                                     |
| Martinez Guimera, Alvaro          | Postdoc / Systems Biology                                                                           | Newcastle University                                                                                                                                                                            | United Kingdom of Great Britain and Northern Ireland (the) |
| Martinez Harms, María José        | Postdoctoral researcher / landscape ecologist                                                       | Center of Applied Ecology and Sustainability                                                                                                                                                    | Chile                                                      |
| Martinez Inigo, Laura             | Primatologist                                                                                       |                                                                                                                                                                                                 | Spain                                                      |
| Martínez Lanfranco, Juan Andrés   | PhD student - Ecology                                                                               | University of Alberta                                                                                                                                                                           | Canada                                                     |
| Martinez Rojas, Enriqueta         | Ph.D. in Biotechnology                                                                              | TU Berlin                                                                                                                                                                                       | Germany                                                    |
| Martinez-Aguero, Maria            | Professor - Biology                                                                                 | Universidad del Rosario                                                                                                                                                                         | Colombia                                                   |
| Martinez-Arroyo, Amparo           | General Director and Researcher / Ecology and Climate Change                                        | National Institute of Ecology and Climate Change                                                                                                                                                | Mexico                                                     |
| Martinez-Bauer, Angelica          | postdoctoral researcher                                                                             | ECOSUR, San Cristóbal de Las Casas                                                                                                                                                              | Mexico                                                     |
| Martínez-Blancas, Alejandra       | PhD Student Ecology                                                                                 | Universidad Nacional Autónoma de México                                                                                                                                                         | Mexico                                                     |
| Martinez-Botia, Patricia          | PhD student - Biomedicine                                                                           | University of Oviedo / ISPA                                                                                                                                                                     | Spain                                                      |
| Martínez-Crego, Begoña            | Research contract                                                                                   | University of Algarve (CCMAR-UAlg)                                                                                                                                                              | Portugal                                                   |
| Martinez-Fernandez, Julia         | Ecologist, Executive director                                                                       | New Water Culture Foundation                                                                                                                                                                    | Spain                                                      |
| Martínez-Fernández, José          | Professor of Physical Geography                                                                     | University of Salamanca                                                                                                                                                                         | Spain                                                      |
| Martinez-Gordillo, Martha         | Botany                                                                                              | Universidad Nacional Autonoma de México (UNAM)                                                                                                                                                  | Mexico                                                     |
| Martinez-Guijosa, Jordi           | MS in Wildlife Research and Management                                                              | Instituto de Investigación en Recursos Cinegéticos (IREC)                                                                                                                                       | Spain                                                      |
| Martinez-Meier, Alejandro         | Research                                                                                            | INTA, National Institute of Agricultural Technology                                                                                                                                             | Argentina                                                  |
| Martínez-Morales, Miguel Angel    | Senior Researcher                                                                                   | El Colegio de la Frontera Sur                                                                                                                                                                   | Mexico                                                     |
| Martinez-Ortega, M. Montserrat    | Full Professor                                                                                      | Universidad de Salamanca                                                                                                                                                                        | Spain                                                      |
| Martínez-Sancho, Elisabet         | Postdoc                                                                                             | Swiss Federal Research Institute WSL                                                                                                                                                            | Switzerland                                                |
| Martínez-Vilalta, Jordi           | Forest ecology                                                                                      | CREAF / UAB                                                                                                                                                                                     | Spain                                                      |
| Martínez-Villa, Johanna Andrea    | Ph.D student                                                                                        | Univertié du Quebec a Montreal                                                                                                                                                                  | Canada                                                     |
| Martinez-Yrizar, Angelina         | PhD Researcher, Ecology                                                                             | Institute of Ecology, UNAM                                                                                                                                                                      | Mexico                                                     |
| Martiniano, Hugo                  | Investigator                                                                                        | Instituto Nacional de Saúde Doutor Ricardo Jorge                                                                                                                                                | Portugal                                                   |
| Martinko, Edward                  | Professor Emeritus, Ecology                                                                         | University of Kansas, Lawrence Kansas                                                                                                                                                           | United States of America (the)                             |
| Martino, David                    | Group Leader, clinical epigenetics                                                                  | Telethon Kids                                                                                                                                                                                   | Australia                                                  |

|                                |                                                                                        |                                                                                                        |                                                            |
|--------------------------------|----------------------------------------------------------------------------------------|--------------------------------------------------------------------------------------------------------|------------------------------------------------------------|
| Martinović, Miloš              | Assistant Ornithologist, PhD candidate                                                 | Croatian Academy of Sciences and Arts, Institute of Ornithology                                        | Croatia                                                    |
| Martins, Marlucia              | titular researcher                                                                     | Museu Paraense Emilio Goeldi                                                                           | Brazil                                                     |
| Martins, Marcio                | Professor of Ecology                                                                   | University of Sao Paulo                                                                                | Brazil                                                     |
| Martins, Isabela               | Biologist                                                                              | UFMG                                                                                                   | Brazil                                                     |
| Martins, Celso                 | Professor/Researcher / Zoology and Biology of Bees                                     | Universidade Federal da Paraíba                                                                        | Brazil                                                     |
| Martins, Bruno Herlander       | Biologist                                                                              | CIBIO - Research Centre in Biodiversity and Genetic Resources                                          | Portugal                                                   |
| Martins, Renato                | Postdoc                                                                                | Instituto Nacional de Pesquisas da Amazônia - INPA                                                     | Brazil                                                     |
| Martins, Eduardo               | Assistant Professor                                                                    | University of Northern British Columbia                                                                | Canada                                                     |
| Martins, Adriana               | Assistant Professor                                                                    | Universidade Católica Portuguesa                                                                       | Portugal                                                   |
| Martins, Fábio                 | Research Fellow                                                                        |                                                                                                        | Portugal                                                   |
| Martins, Helen                 | Senior Scientist Emerita                                                               | University of th Azores                                                                                | Portugal                                                   |
| Martins Sobrinho, Paulo Mateus | PhD. Student                                                                           | Universidade Federal Rural de Pernambuco                                                               | Brazil                                                     |
| Martins-Loução, Maria Amélia   | Full Professor of Ecology                                                              | Centre for Ecology, Evolution and Environmental Sciences. Faculdade de Ciências Universidade de Lisboa | Portugal                                                   |
| Martinson, Kelly               | science writer                                                                         | ksquare writing, inc.                                                                                  | United States of America (the)                             |
| Martiny, Jennifer              | Professor, Ecology and Evolutionary Biology                                            | University of California, Irvine                                                                       | United States of America (the)                             |
| Martiskainen, Olli             | PhD in Physical Chemistry                                                              | University of Turku (Alumni)                                                                           | Finland                                                    |
| Martius, Christopher           | Managing Director, and Team Leader, Climate Change, Bioenergy and Low-Carbon Emissions | Center for International Forestry Research (CIFOR) Germany gGmbH                                       | Germany                                                    |
| Martorell, Carlos              | Full Professor in Ecology                                                              | Universidad Nacional Autónoma de México                                                                | Mexico                                                     |
| marty, gerard                  | associate researcher                                                                   | INRA                                                                                                   | France                                                     |
| Marty, Laëtitia                | Researcher in nanoscience                                                              | CNRS                                                                                                   | France                                                     |
| Marvin, Rosamund               | Physician                                                                              | Garden House                                                                                           | United Kingdom of Great Britain and Northern Ireland (the) |
| Marx-Rattner, Ruth             | Research Associate                                                                     | Johns Hopkins university                                                                               | United States of America (the)                             |
| Marzal, Virginia               | Professor/Urban Development Planner                                                    | National University of Engineering                                                                     | Peru                                                       |
| Marzano, Raffaella             | Assistant Professor                                                                    | University of Torino                                                                                   | Italy                                                      |
| Marzec, Magdalena              | PhD, biologist                                                                         |                                                                                                        | Poland                                                     |
| Mas-Pla, Josep                 | Professor                                                                              | Universitat de Girona, and Catalan Institute for Water Research                                        | Spain                                                      |
| Mascall, John                  | Psychologist                                                                           |                                                                                                        | United Kingdom of Great Britain and Northern Ireland (the) |
| Mascarenhas, André             | Post-Doc Researcher                                                                    |                                                                                                        | Germany                                                    |
| Maschke, Judith                | research assistant                                                                     | artec-sustainability research center (University of Bremen)                                            | Germany                                                    |
| Masci, Lorella                 | Post Doctoral position                                                                 | ISTerre (University Grenoble Alpes)                                                                    | France                                                     |
| Mascia, Michael                |                                                                                        | Conservation International                                                                             | United States of America (the)                             |
| Masciale, Rita                 | Research Scientist - Hydrogeologist                                                    | National Research Council (CNR) -Water Research Institute (IRSA)                                       | Italy                                                      |

|                             |                                                                          |                                                 |                                                            |
|-----------------------------|--------------------------------------------------------------------------|-------------------------------------------------|------------------------------------------------------------|
| Masclaux, Hélène            | Associate professor, Limnology                                           | Université de Franche Comté                     | France                                                     |
| Maselli, Luigi J.           | Neuroscientist                                                           | Mediterranean Society of Lifestyle Medicine     | Italy                                                      |
| Masello, Juan F.            | Principal Investigator                                                   | Justus Liebig University Gießen                 | Germany                                                    |
| Maser, Chris                | Ecologist/Author: Social-Environmental Sustainability                    | Self-Employed                                   | United States of America (the)                             |
| Masese, Frank               | Senior Lecturer of Aquatic aSciences                                     | University of Eldoret                           | Kenya                                                      |
| Masila, Nicodemus           | Environmental health scholar                                             | Flinders university                             | Australia                                                  |
| Masiliūnas, Dainius         | PhD candidate in Remote Sensing                                          | Wageningen University & Research                | Netherlands (the)                                          |
| Masilkova, Michaela         | PhD candidate in zoology                                                 | Faculty of Science, University of South Bohemia | Czech Republic (the)                                       |
| Masino, Susan               | Professor of Applied Science / Neuroscience                              | Trinity College                                 | United States of America (the)                             |
| Masojć, Mirosław            | archaeologist                                                            | University of Wrocław                           | Poland                                                     |
| Masolele, Robert            | PhD Student on assessing land use change with remote sensing time series | Wageningen university                           | Netherlands (the)                                          |
| Mason, Samantha             | PhD Student                                                              | Durham University                               | United Kingdom of Great Britain and Northern Ireland (the) |
| Mason, Lucy                 | Conservation Scientist                                                   | RSPB                                            | United Kingdom of Great Britain and Northern Ireland (the) |
| Mason, Kate                 | Epidemiology                                                             | University of Liverpool                         | United Kingdom of Great Britain and Northern Ireland (the) |
| Mason, Euan                 | Professor                                                                | University of Canterbury                        | New Zealand                                                |
| Masque, Pere                | Professor                                                                | Edith Cowan University                          | Australia                                                  |
| Masquelier, Timothée        | Permanent researcher / Neuroscience & AI                                 | CNRS                                            | France                                                     |
| Massa, Federico             | PhD student                                                              | Centro di Ricerca E. Piaggio                    | Italy                                                      |
| Massabuau, Jean-Charles     | Emeritus Research Director                                               | CNRS & University of Bordeaux                   | France                                                     |
| Massad, Raia Silvia         | Environmental sciences                                                   | Inra - ecosys                                   | France                                                     |
| Massaine Moulatlet, Gabriel |                                                                          | Universidad Regional Amazónica Ikiam            | Ecuador                                                    |
| Massana, Ramon              | Researcher                                                               | Institut de Ciències del Mar, CSIC              | Spain                                                      |
| Massari, Christian          | Researcher                                                               | Italian National Research Council               | Italy                                                      |
| Massé, Stéphanie            | Research Associate / Limnology                                           | Université de Rennes 1                          | France                                                     |
| Massé, Laurent              | Maitre de conférences palaeoclimatology                                  | UMR EPOC Université de Bordeaux                 | France                                                     |
| Massei, Nicolas             | Professor of Hydrology                                                   | University of Rouen-Normandie                   | France                                                     |
| Massimino, Dario            | Research Ecologist                                                       | British Trust for Ornithology                   | United Kingdom of Great Britain and Northern Ireland (the) |
| Massiot, Inès               | Researcher in Physics                                                    | CNRS                                            | France                                                     |
| Masson, Thierry             | researcher, mathematical physics                                         | CNRS                                            | France                                                     |
| Massot, Manuel              | Researcher in Ecology and Evolution                                      | CNRS                                            | France                                                     |
| Mast, Joy                   | Professor, Geospatial Science and Biogeography                           | Carthage College                                | United States of America (the)                             |
| Masters, Louise             | MSc Conservation Biology                                                 | DICE, University of Kent                        | United Kingdom of Great Britain and Northern Ireland (the) |
| Masto, Nick                 | Ecology and Conservation                                                 | Clemson University                              | United States of America (the)                             |
| Mastrogiannopoulos, Alex    | PhD Student                                                              | University of Bristol                           | United Kingdom of Great Britain and Northern Ireland (the) |
| Mataloni, Gabriela          | Principal researcher - Associate Professor                               | CONICET -UNSAM                                  | Argentina                                                  |

|                            |                                                                                    |                                                                                                         |                                                            |
|----------------------------|------------------------------------------------------------------------------------|---------------------------------------------------------------------------------------------------------|------------------------------------------------------------|
| Matas, Antonio J           | Associate Professor of Plant Physiology                                            | Universidad de Málaga                                                                                   | Spain                                                      |
| Mateo-Tomás, Patricia      | Lecturer in Zoology, Researcher in Conservation Biology                            | Oviedo University                                                                                       | Spain                                                      |
| Mateus, Simao              | Paleontologist                                                                     | Parque dos Dinossauros da Lourinha                                                                      | Portugal                                                   |
| Mathas, Andrew             | Professor of Mathematics                                                           | University of Sydney                                                                                    | Australia                                                  |
| Mathé-Hubert, Hugo         | Evolutionary Ecology                                                               |                                                                                                         | France                                                     |
| MATHEVET, Raphaël          | Senior scientist                                                                   | CEFE CNRS Montpellier                                                                                   | France                                                     |
| Mathews, Christopher       | Biochemistry                                                                       | Oregon State University                                                                                 | United States of America (the)                             |
| Mathez-Stiefel, Sarah-Lan  | Senior Research Scientist, Ethnobiologist & Human Geographer                       | Centre for Development and Environment, University of Bern                                              | Switzerland                                                |
| Matiolli, Cleverson Carlos | Plant Biology                                                                      | Universidade Estadual de Campinas                                                                       | Brazil                                                     |
| Matoničkin Kepčija, Renata | Associate Professor, Biology                                                       | University of Zagreb, Faculty of Science, Department of Biology                                         | Croatia                                                    |
| Matsubara, Shizue          | Biologist                                                                          | Forschungszentrum Juelich                                                                               | Germany                                                    |
| Matsudo, Marcelo           | Professor - microbiology and biotechnology                                         | Universidade Federal de Itajubá                                                                         | Brazil                                                     |
| Matta, Gustavo             | Public health researcher                                                           | Oswaldo Cruz Foundation                                                                                 | Brazil                                                     |
| Matta, Micaela             | Postdoctoral Fellow, Chemistry                                                     | University of Liverpool                                                                                 | United Kingdom of Great Britain and Northern Ireland (the) |
| Matteodo, Magali           | PhD Environmental Sciences                                                         | University of Lausanne                                                                                  | Switzerland                                                |
| Mattera, Lorenzo           | Full Professor Physics                                                             | University of Genova                                                                                    | Italy                                                      |
| Matteucci, Giorgio         | Director and Forest Ecologist                                                      | Inst. for Agriculture and Forest Systems in the Mediterranean of the National Research Council of Italy | Italy                                                      |
| Matteuzzo, Marcela Camargo | Professora/Bióloga/PhD Recursos Naturais and Sciences de l'Environnement Terrestre | Instituto Federal de Minas Gerais                                                                       | Brazil                                                     |
| Matthews, Blake            | Scientist                                                                          | Eawag                                                                                                   | Switzerland                                                |
| Matthies, Aila-Leena       | Professor of Social Work                                                           | University of Jyväskylä                                                                                 | Finland                                                    |
| Matthies, Michael          | Prof. em. Environmental Systems Research                                           | University of Osanbrueck                                                                                | Germany                                                    |
| Matthysen, Erik            | Professor in Biology                                                               | University of Antwerp                                                                                   | Belgium                                                    |
| Mattila, Anniina           | Postdoctoral researcher, Ecology and Evolutionary Biology                          | University of Helsinki                                                                                  | Finland                                                    |
| Mattoni, Camilo            | Professor and researcher, Biodiversity                                             | FCEfYn Universidad Nacional de Córdoba - CONICET                                                        | Argentina                                                  |
| Matutinovic, Igor          | Professor / Ecological economics                                                   | Zagreb School of Economics and Management                                                               | Croatia                                                    |
| Matzen, Sarick             | Doctoral Candidate, Soil Biogeochemistry                                           | University of California-Berkeley                                                                       | United States of America (the)                             |
| Matzner, Christopher       | Professor of Astronomy and Astrophysics                                            | University of Toronto                                                                                   | Canada                                                     |
| Maude, Glyn                | Ecologist                                                                          | Kalahari Research and Conservation                                                                      | Botswana                                                   |
| Maugis, Pascal             | Researcher, Water resources and CC adaptation                                      | LSCE                                                                                                    | France                                                     |
| Mauleon, Fernando          | Retired engineer                                                                   | My own                                                                                                  | Spain                                                      |
| MAUNY, Fred                | Professor , Public Helath                                                          | University of Franche-Comté                                                                             | France                                                     |
| Maurel, Noëlie             | Postdoctoral researcher, Ecology                                                   |                                                                                                         | Germany                                                    |
| Maurel, Thomas             | Ensembl Bioinformatician                                                           | EMBL-EBI                                                                                                | United Kingdom of Great Britain and Northern Ireland (the) |

|                      |                                                          |                                                                   |                                                            |
|----------------------|----------------------------------------------------------|-------------------------------------------------------------------|------------------------------------------------------------|
| Maurer, Golo         | KBA Program Leader                                       | BirdLife Australia                                                | Australia                                                  |
| Maurer, Dirk         | Researcher in Biochemistry                               | Uppsala University                                                | Sweden                                                     |
| maury, chloris       | PhD - Animal Behaviour                                   |                                                                   | France                                                     |
| Maury, Anaëlle       | Astrophysicist                                           | CEA/DRF/IRFU, Astrophysics department, Paris Saclay University    | France                                                     |
| Mauvisseau, Quentin  | PhD candidate                                            | Derby University                                                  | United Kingdom of Great Britain and Northern Ireland (the) |
| Maxime, Herve        | Innovation principal scientist                           | GSK                                                               | Singapore                                                  |
| Maxwell, Nicholas    | Emeritus Reader, Philosophy of Science                   | University College London                                         | United Kingdom of Great Britain and Northern Ireland (the) |
| May, Michael         | Graduate Student in Plasma Physics                       | Princeton University                                              | United States of America (the)                             |
| May, Xavier          | researcher in geography                                  | Université Libre de Bruxelles                                     | Belgium                                                    |
| May, Peter           | Full Professor Development, Agriculture and Society      | Federal Rural University of Rio de Janeiro                        | Brazil                                                     |
| May, Christine       | Principal Coastal Engineer and Climate Scientist         | Silvestrum Climate Associates                                     | United States of America (the)                             |
| May, Jeffrey         | Department of Biological Sciences, Retired               | Marshall University                                               | United States of America (the)                             |
| May-Collado, Laura J | Marine Biologist                                         | UNIVERSITY OF VERMONT                                             | United States of America (the)                             |
| Maya, Carmen         | Research                                                 | CICESE                                                            | Mexico                                                     |
| Mayar, Morwarid      | Chemistry                                                | Wageningen University                                             | Netherlands (the)                                          |
| Mayaux, Philippe     | Tropical ecology                                         | European Commission                                               | Belgium                                                    |
| Mayer, Leonard       | Microbiologist                                           | retired from CDC                                                  | United States of America (the)                             |
| Mayer, Marie         | MD                                                       |                                                                   | France                                                     |
| Mayeur, Anaël        | Scientific Ecology                                       | University of Paris Sud                                           | France                                                     |
| maymo, vincent       | Assistant Professor                                      | University of Bordeaux                                            | France                                                     |
| mayo, valerie        | neurosciences                                            | university bordeaux                                               | France                                                     |
| Mayoral, Alfredo     | PhD Geography-Postdoctoral fellow                        | GEOLAB UMR 6042 UCA-CNRS                                          | France                                                     |
| Mayr, Antonia        | PostDoc in Tropical Ecology                              | University of Würzburg                                            | Germany                                                    |
| Mayr, Felix          | PhD student in biology                                   | Max Planck Institute for Biology of Ageing                        | Germany                                                    |
| Maysels, Rachael     | Environmental Scientist                                  | Universidad del Cauca                                             | Colombia                                                   |
| Mazal, Lucas         | PhD student, Evolutionary biology                        | UCA/CNRS                                                          | France                                                     |
| MAZAN, Sylvie        | Director of research, evolutionary developmental biology | CNRS                                                              | France                                                     |
| Mazeau, Solène       | Engineer Biology and Genetic                             | IPS2                                                              | France                                                     |
| Mazepa, Glib         | PhD student in evolutionary biology                      | Lausanne University and Uppsala University                        | Switzerland                                                |
| Mazoyer, Marie       | Postdoctoral Researcher                                  | CNRM/Météo-France                                                 | France                                                     |
| Mazoyer, Johan       | Postdoctoral fellow in Astronomy                         | California Institute of Technology                                | United States of America (the)                             |
| Mazzilli, Naomi      | Lecturer of hydrogeology                                 | Avignon University                                                | France                                                     |
| Mazzoldi, Carlotta   | Associate Professor                                      | Department of Biologia, University of Padova                      | Italy                                                      |
| Mazzoli, Claudio     | Associate Professor, Applied Petrography                 | University of Padova, Department of Geosciences                   | Italy                                                      |
| Mazzoni, Valerio     | Researcher, entomologist                                 | Fondazione Edmund Mach                                            | Italy                                                      |
| Mazzorana, Bruno     | Natural Hazard Risks                                     | Universidad Austral de Chile - Instituto de Ciencias de la Tierra | Chile                                                      |
| MBWANA, HAMIDA       | STUDENT- IMBRSea                                         | GHENT UNIVERSITY                                                  | Belgium                                                    |

|                            |                                                      |                                                                          |                                                            |
|----------------------------|------------------------------------------------------|--------------------------------------------------------------------------|------------------------------------------------------------|
| McAdam, Scott              | Assistant Profressor, Botany                         | Purdue University                                                        | United States of America (the)                             |
| McAfee, Kathleen           | Professor, PhD Geography, UC Berkeley                | San Francisco State University                                           | United States of America (the)                             |
| McBride, John              | Science Education Director                           | Teachink                                                                 | South Africa                                               |
| McCairns, Scott            | Research Scientist/Chargé de recherche               |                                                                          | France                                                     |
| McCallin, Shawna           | Postdoctoral researcher                              | EPFL                                                                     | Switzerland                                                |
| McCallum, Rupert           | Mathematics                                          | Last employer University of Tuebingen, seeking work                      | Netherlands (the)                                          |
| McCallum, Hamish           | Professor                                            | Griffith University, Environmental Futures Research Institute            | Australia                                                  |
| McCann, Kevin              | Professor, Canadian Research Chair in Biodiversity   | University of Guelph                                                     | Canada                                                     |
| McCarthy, James J.         | Professor of Oceanography                            | Harvard University                                                       | United States of America (the)                             |
| McCarthy, Janine           | Public Health                                        | Physicians Committee for Responsible Medicine                            | United States of America (the)                             |
| McCarthy, Chris            | Astronomer                                           | San Francisco State Univ.                                                | United States of America (the)                             |
| McCauley, Ross             | Associate Professor of Biology - Plant Biodiversity  | Fort Lewis College                                                       | United States of America (the)                             |
| McClagherty, Charles       | Professor Emeritus, Biology                          | University of Mount Union                                                | United States of America (the)                             |
| McCluskey, Shannon         | Wildlife Biologist                                   | Washington State University                                              | United States of America (the)                             |
| McColl, Hugh               | Postdoc - population genetics                        | University of Copenhagen                                                 | Denmark                                                    |
| McConkey, Kim              | Ecologist                                            | National Institute of Advanced Studies                                   | India                                                      |
| McConville, Kristian       | Research Fellow in Marine Biology                    | Plymouth Marine Laboratory                                               | United Kingdom of Great Britain and Northern Ireland (the) |
| McCormick, Sheila          | Professor, Plant and Microbial Biology               | UC-Berkeley                                                              | United States of America (the)                             |
| McCormick, Wanda           | Senior Lecturer in Nutritional Biochemistry          | University of Northampton                                                | United Kingdom of Great Britain and Northern Ireland (the) |
| McCormick-Ray, Jerry       | Marine ecologist                                     | University of Virginia                                                   | United States of America (the)                             |
| McCoy, Daniel              | Postdoctoral researcher, Atmospheric Science         | University of Leeds                                                      | United Kingdom of Great Britain and Northern Ireland (the) |
| McCoy, Karen               | Researcher - Evolutionary Ecology                    | CNRS                                                                     | France                                                     |
| McCreery, Kim              | Carnivore Biologist                                  | African Wild Dog Conservancy                                             | United States of America (the)                             |
| McCulloh, Katherine        | Associate Professor of Botany                        | University of Wisconsin-Madison                                          | United States of America (the)                             |
| McCullough Hennessy, Sarah | Conservation Biologist                               | San Diego Zoo Institute for Conservation Research                        | United States of America (the)                             |
| McDaniel, Carl             | Professor Emeritus, Visiting Professor               | Rensselaer, Oberlin                                                      | United States of America (the)                             |
| McDermid, Greg             | Professor of Geography                               | University of Calgary                                                    | Canada                                                     |
| McDonald, Marisa           | Graduate student                                     | University of Hawaii at Manoa                                            | United States of America (the)                             |
| McDonald, Luke             | Postdoctoral researcher, Natural photonics           | University College Cork                                                  | Ireland                                                    |
| McDougall, John            | MD                                                   | The McDougall Program, Santa Rosa, CA                                    | United States of America (the)                             |
| McDowell, William          | Professor                                            | University of New Hampshire                                              | United States of America (the)                             |
| McEwan, Amber              | Consultant - Ecology and PhD candidate - Ecology     | Riverscapes Freshwater Ecology Ltd and Victoria University of Wellington | New Zealand                                                |
| McFarland, Kent            | Conservation Biologist                               | Vermont Center for Ecostudies                                            | United States of America (the)                             |
| McGee, John                | Professor of Geospatial Extension, Dept. of Forestry | Virginia Tech                                                            | United States of America (the)                             |
| McGonigal, Portiaa         | Master of Science Student, Biology                   | University of British Columbia                                           | Canada                                                     |
| McGrath, Gavan             | Adjunct Research Fellow                              | The University of Western Australia                                      | Australia                                                  |

|                     |                                                                                              |                                                                     |                                                            |
|---------------------|----------------------------------------------------------------------------------------------|---------------------------------------------------------------------|------------------------------------------------------------|
| McGrath, Andrew     | Director of environmental research institute - remote sensing scientist                      | Airborne Research Australia, Flinders University of South Australia | Australia                                                  |
| MCGREEVY, PAUL      | Professor of Animal Behaviour and Animal Welfare Science                                     | University of Sydney                                                | Australia                                                  |
| McGrouther, Mark    | Senior Fellow                                                                                | Australian Museum                                                   | Australia                                                  |
| McGuire, Krista     | Associate Professor                                                                          | University of Oregon                                                | United States of America (the)                             |
| McHale, Cliona      | Specialist, Environmental Health Sciences                                                    | University of California Berkeley                                   | United States of America (the)                             |
| McIlwain, Lisa      | Human Geography                                                                              | University of the Sunshine Coast                                    | Australia                                                  |
| McInnes, Allison    | Biological Oceanographer                                                                     |                                                                     | Australia                                                  |
| McIntosh, Angus     | Professor of Freshwater Ecology                                                              | University of Canterbury                                            | New Zealand                                                |
| McIntosh, Anne      | Assistant Professor Biology                                                                  | University of Alberta                                               | Canada                                                     |
| McIntyre, Jason     | Lecturer in Psychology                                                                       | Liverpool John Moores University                                    | United Kingdom of Great Britain and Northern Ireland (the) |
| McIver, Liam        | MSc Student conservation biology                                                             | University of Canterbury                                            | New Zealand                                                |
| McKechnie, Andrew   | Professor of Zoology                                                                         | University of Pretoria                                              | South Africa                                               |
| McKee, Suzanne      | PhD in Experimental Psychology                                                               |                                                                     | United States of America (the)                             |
| McKelvy, Alexander  | Evolutionary Biology / Herpetology                                                           |                                                                     | United States of America (the)                             |
| McKenzie, Elizabeth | Honorary Academic (analytical chemist)                                                       | University of Auckland                                              | New Zealand                                                |
| McKenzie, Katherine | Renewable Energy - Research Engineer                                                         | University of Hawaii                                                | United States of America (the)                             |
| McKinney, Shawn     | Ecologist                                                                                    |                                                                     | United States of America (the)                             |
| McKinnon, John      | Senior Lecturer (adjunct)                                                                    | Southern Cross University                                           | Australia                                                  |
| McKittrick, Leo     | Scientific Officer / Citizen Science (& Radon Advice)                                        | Environmental Protection Agency                                     | Ireland                                                    |
| McLaughlin, John    | Associate Professor of Environmental Sciences                                                | Western Washington University                                       | United States of America (the)                             |
| McLaughlin, Robert  | Assistant Air Pollution Control Officer - Retired. Air Quality Regulatory Enforcement Agency | Butte County Air Quality Management District                        | United States of America (the)                             |
| McLeod, Christa     | Environmental Education Park Ranger                                                          | US Fish & Wildlife Service                                          | United States of America (the)                             |
| McLester, Edward    |                                                                                              | Liverpool John Moores University                                    | United Kingdom of Great Britain and Northern Ireland (the) |
| McMahan, Caleb      | Ichthyologist                                                                                | Field Museum of Natural History                                     | United States of America (the)                             |
| McMahon, Dino       | Professor of Entomology                                                                      | Freie Universität Berlin                                            | Germany                                                    |
| McManus, Hilary     | Associate Professor of Biological and Environmental Sciences                                 | Le Moyne College                                                    | United States of America (the)                             |
| McMurray, Nancy     | Psychology                                                                                   | University of Melbourne (retired)                                   | Australia                                                  |
| McNamee, Jason      | Senior Scientist                                                                             | Lucent Biosciences                                                  | Canada                                                     |
| McQueen, Donald     | Emeritus Research Professor                                                                  | York University                                                     | Canada                                                     |
| McRae, David        | Applied Environmental Anthropologist - Research Project Coordinator                          | University of Texas Southwestern                                    | United States of America (the)                             |
| MCRAE, MARJORIE     | Executive Consultant                                                                         | Opinion Dynamics Corp                                               | United States of America (the)                             |
| McShane, Heather    | Program Director, McGill Sustainability Systems Initiative                                   | McGill University                                                   | Canada                                                     |
| McWhorter, Andrea   | Research Scientist -Microbiology                                                             | University of Adelaide                                              | Australia                                                  |
| McWhorter, Todd     | Senior Lecturer in Veterinary Physiology                                                     | University of Adelaide                                              | Australia                                                  |

|                                  |                                                              |                                                                    |                                                            |
|----------------------------------|--------------------------------------------------------------|--------------------------------------------------------------------|------------------------------------------------------------|
| Meaden, Geoff                    | Retired Fisheries/GIS researcher                             | Canterbury Christ Church University                                | United Kingdom of Great Britain and Northern Ireland (the) |
| Meads, Andrew                    | Lecturer, Computer Science                                   | University of Auckland                                             | New Zealand                                                |
| Meaney, Carron                   | Wildlife Ecologist, Meaney Consulting LLC                    | University of Colorado Boulder                                     | United States of America (the)                             |
| Meave, Jorge A.                  | Senior Professor/Vegetation Ecology                          | Universidad Nacional Autónoma de México                            | Mexico                                                     |
| Mecenero, Silvia                 | Biodiversity Conservation                                    |                                                                    | South Africa                                               |
| MECHIN, Laurence                 | Researcher                                                   | CNRS                                                               | France                                                     |
| mechling, katherine              | m.d.                                                         | clear creek family practice                                        | United States of America (the)                             |
| Médail, Frédéric                 | Professor of Ecology                                         | Aix Marseille University / IMBE                                    | France                                                     |
| Medawar, Evelyn                  | Dual MSc Brain and Mind Sciences                             | Max Planck Institute for Human Cognitive and Brain Sciences        | Germany                                                    |
| Medda, Rebecca                   | PostDoc                                                      | Max Planck Institute for Medical Research                          | Germany                                                    |
| Medeiros, Renata                 | Lecturer in Medical Statistics                               | Cardiff University                                                 | United Kingdom of Great Britain and Northern Ireland (the) |
| Medeiros Antar, Guilherme        | Ph.D. Candidate, Plant Systematics                           | Instituto de Biociências - Universidade de São Paulo               | Brazil                                                     |
| Mederos, Jorge                   | Researcher un Entomology                                     | Museu de Ciències Naturals de Barcelona                            | Spain                                                      |
| Medialdea-Carrera, Raquel        | Epidemiologist Fellow                                        | Infectious Disease Control Unit, Ministry of Health of Malta       | Malta                                                      |
| Medianero, Francisco Javier      | Professor Archaeology (Dr)                                   | universidad Catolica de Temuco                                     | Chile                                                      |
| Medianero Soto, Francisco Javier | Docente-Investigador / Arqueología (Dr.)                     | Universidad Católica de Temuco                                     | Chile                                                      |
| Medic, Nikola                    | PhD student in marine ecology                                | University Of Copenhagen                                           | Denmark                                                    |
| Medina, Liliana                  | MSc LEED AP BD+C Teacher and LCA Researcher                  | Universidad Colegio Mayor de Cundinamarca                          | Colombia                                                   |
| Medina-Sánchez, Juan Manuel      | Senior Lecturer in Ecology                                   | University of Granada                                              | Spain                                                      |
| Medina-Vega, Jose                | PhD candidate                                                | Wageningen University and Research                                 | Netherlands (the)                                          |
| Medina-Vogel, Gonzalo            | Professor                                                    | Universidad Andres Bello                                           | Chile                                                      |
| Medrano García, Sandra           | PhD student                                                  | Universidad Complutense de Madrid                                  | Spain                                                      |
| Medronho, Ricardo                | Emeritus Professor                                           | Federal University of Rio de Janeiro                               | Brazil                                                     |
| Meek, Jared                      | Graduate Student, Botany                                     | Columbia University                                                | United States of America (the)                             |
| Meekan, Mark                     | Senior Principal Research Scientist                          | Australian Institute of Marine Science                             | Australia                                                  |
| Meeuwig, Jessica                 | Professor of Marine Ecology                                  | University of Western Australia                                    | Australia                                                  |
| Mehra, Anchal                    | PhD Student - Microbiology & Immunology                      | University of North Carolina at Chapel Hill                        | United States of America (the)                             |
| Mehra, Satya Prakash             | Environmental cum Development Professional                   | Rajputana Society of Natural History                               | India                                                      |
| Mehra, Sarita                    | Environmental cum Development Professional                   | Rajputana Society of Natural History                               | India                                                      |
| Mehta, Ph.D., Michael            | Professor, Department of Geography and Environmental Studies | Thompson Rivers University                                         | Canada                                                     |
| Meier, Philipp                   | Machine Learning Research                                    | Tiplu GmbH                                                         | Germany                                                    |
| Meier, Christina                 | Postdoctoral Fellow                                          | University of Manitoba                                             | Canada                                                     |
| Meigs, Garrett                   | Forest Ecologist                                             | Oregon State University                                            | United States of America (the)                             |
| Meijaard, Erik                   | Director                                                     | Borneo Futures                                                     | Brunei Darussalam                                          |
| Meijer, Jan Jaap                 | Physical Oceanography                                        | Institute for Marine and Antarctic Studies/ University of Tasmania | Australia                                                  |
| Meijering, Jurian                | Lecturer Research Methodology                                | Wageningen University                                              | Netherlands (the)                                          |

|                                |                                                                            |                                                                              |                                                            |
|--------------------------------|----------------------------------------------------------------------------|------------------------------------------------------------------------------|------------------------------------------------------------|
| Meillere, Alizee               | Postdoctoral Research Fellow                                               | Deakin University                                                            | Australia                                                  |
| Meine, CurtCurt                | Senior Fellow                                                              | Aldo Leopold Foundation & Center for Humans and Nature                       | United States of America (the)                             |
| Meinertzhagen, Hannah          | PhD student biosciences                                                    | University of Exeter                                                         | United Kingdom of Great Britain and Northern Ireland (the) |
| Meir, Patrick                  | Professor, Forest Ecology                                                  | Australian National University                                               | Australia                                                  |
| Meira-Cartea, Pablo Ángel      | PhD                                                                        | Universidad de Santiago de Compostela                                        | Spain                                                      |
| Meirelles, Pedro               | Assistant Professor                                                        | Federal University of Bahia                                                  | Brazil                                                     |
| Meis, Jacques F.               | Consultant Microbiologist (MD)                                             | Canisius Wilhelmina Hospital Nijmegen                                        | Netherlands (the)                                          |
| Meisrimler, Claudia-Nicole     | Lecturer Plant Biology                                                     | University of Canterbury                                                     | New Zealand                                                |
| Meissner, Miriam               | Assistant Professor, Cultural Sociology                                    | Maastricht University                                                        | Netherlands (the)                                          |
| Mejia, Lorena                  | Microbiology university teacher and researcher                             | Universidad San Francisco de Quito                                           | Ecuador                                                    |
| Melaku Canu, Donata            | Marine research scientist                                                  | Istituto Nazionale di Oceanografia e di Geofisica Sperimentale OGS           | Italy                                                      |
| Melendez, Elvia                | Professor                                                                  | University of Puerto Rico-Rio Piedras                                        | United States of America (the)                             |
| Melero, Yolanda                | Postdoctoral Researcher                                                    | University of Reading                                                        | United Kingdom of Great Britain and Northern Ireland (the) |
| Melin, Eric                    | Researcher                                                                 | Université de Liège                                                          | Belgium                                                    |
| Melis, Claudia                 | Associate Professor                                                        | Queen Maud University College                                                | Norway                                                     |
| Mellado Díaz, Andrés           | Stream ecologist                                                           | Tragsatec                                                                    | Spain                                                      |
| Mellbye, Brett                 | Postdoctoral Research Scientist                                            | Oregon State University                                                      | United States of America (the)                             |
| Mellink, Eric                  | Senior Researcher, Wildlife ecology and conservation                       | Centro de Investigación Científica y de Educación Superior de Ensenada, B.C. | Mexico                                                     |
| Melo, Celine                   | Teacher                                                                    | Federal University of Uberlândia                                             | Brazil                                                     |
| Melo de Almeida, Thaís         |                                                                            | Instituto Nacional de Pesquisas da Amazônia                                  | Brazil                                                     |
| Meloro, Carlo                  | Senior Lecturer in Vertebrate Palaeoecology                                | Liverpool John Moores University                                             | United Kingdom of Great Britain and Northern Ireland (the) |
| Melovski, Dime                 | Wildlife biologist                                                         | Macedonian Ecological Society                                                | Macedonia, Republic of (the former Yugoslavia)             |
| Melquiond, Adrien              | Postdoc Bioinformatics                                                     | University Medical Center Utrecht - Utrecht University                       | Netherlands (the)                                          |
| Melton, Sierra                 | NSF Graduate Research Fellow, Geosciences                                  | Pennsylvania State University                                                | United States of America (the)                             |
| Melton, Bruce                  | Civil Engineer, Director                                                   | Climate Change Now Initiative                                                | United States of America (the)                             |
| Mena-Nieto, Angel              | Energy and CO2 emissions researcher and Environmental Management Professor | University of Huelva                                                         | Spain                                                      |
| Menck, Carlos FM               | Professor on Microbiology and Molecular Biology                            | Institute of Biomedical Sciences, University of Sao Paulo                    | Brazil                                                     |
| Mencuccini, Maurizio           | Professor Plant and Ecosystem Ecology                                      | ICREA                                                                        | Spain                                                      |
| Mendes, Sara                   | PhD student                                                                | Universidade de Coimbra                                                      | Portugal                                                   |
| Mendes Alvarenga, Renato Lúcio | PhD in Fungal Biology                                                      | Universidade Federal de Pernambuco                                           | Brazil                                                     |
| Mendes Pontes, Antonio Rossano | Associate Scientist, Biodiversity                                          | National Institute of Amazonian Research - INPA                              | Brazil                                                     |
| Mendes Veiga, Miguel           | PhD candidate                                                              | Leibniz Institute für Zoo und Wildtierforschung                              | Germany                                                    |

|                              |                                                            |                                                                                         |                                                            |
|------------------------------|------------------------------------------------------------|-----------------------------------------------------------------------------------------|------------------------------------------------------------|
| Mendez, Maria                | Conservation biology                                       |                                                                                         | Spain                                                      |
| Mendez, Javier               | Marine Biology                                             |                                                                                         | United States of America (the)                             |
| Mendez, David                | PhD Student/ Industrial Engineer                           | UNAV                                                                                    | Spain                                                      |
| MENDEZ, Loriane              | Marine ecology                                             | Mediterranean Science Commission (CIESM)                                                | Monaco                                                     |
| MENDEZ ALONZO, RODRIGO       | Researcher Plant Ecology and Physiology                    | Centro de Investigacion Cientifica y de Educacion Superior de Ensenada, Baja California | Mexico                                                     |
| Mendicini, Daniel Jose       | Profesor de Física                                         |                                                                                         | Argentina                                                  |
| Mendonça-Furtado, Olívia     | Posdoc                                                     | University of São Paulo                                                                 | Brazil                                                     |
| Mendoza, Blanca              | Professor                                                  | Universidad nacional Autonoma de Mexico                                                 | Mexico                                                     |
| MENDOZA ALFARO, ROBERTO      | Professor                                                  | UANL                                                                                    | Mexico                                                     |
| Mendoza-García, Manuel       | Senior Scientist                                           | Museo Nacional de Ciencias Naturales                                                    | Spain                                                      |
| Mendoza-Henao, Angela M.     | Biologist Ph.D candidate                                   | Universidad Nacional Autónoma de Mexico                                                 | Colombia                                                   |
| Meneses, Pablo               | Geographer                                                 | Universidad Regional Amazónica Ikiam                                                    | Ecuador                                                    |
| Menezes, Carina              | Biologist                                                  | INSA                                                                                    | Portugal                                                   |
| Menezes, Lucas               | PhD candidate in Physics                                   | University of Campinas (UNICAMP)                                                        | Brazil                                                     |
| Mengo, Luciana               | PhD Student                                                | CICTERRA                                                                                | Argentina                                                  |
| Menk, Linda                  | Researcher                                                 | University of Salzburg                                                                  | Austria                                                    |
| Menkhorst, Peter             | Principal Scientist                                        | Arthur Rylah Institute for Environmental Research                                       | Australia                                                  |
| Menon, Márcio José           | Prof. Colaborator                                          | Universidade Estadual de Campinas                                                       | Brazil                                                     |
| Menounos, Brian              | Full Professor and Canada Research Chair in Glacier Change | University of Northern British Columbia                                                 | Canada                                                     |
| Mentesana, Lucia             | PhD student                                                | Max Planck Institute for Ornithology                                                    | Germany                                                    |
| Mentges, Andrea              | Postdoc                                                    | German Centre for Integrative Biodiversity Research                                     | Germany                                                    |
| Menzel, Florian              | Assistant Professor, Biology                               | University of Mainz                                                                     | Germany                                                    |
| menzel Barraqueta, jan-Lukas | Postdoctoral fellowship Ocean biogeochemistry              | Stellenbosch University                                                                 | South Africa                                               |
| Meraloğlu, Furkan            | PhD Student / International Relations                      | Özyeğin University                                                                      | Turkey                                                     |
| MERAZ-RODRIGUEZ, MONICA      | PROFESSOR/ENVIRONMENTAL BIOTECHNOLOGY                      | UNIVERSIDAD AUTÓNOMA METROPOLITANA-IZTAPALAPA                                           | Mexico                                                     |
| MERCALLI, Luca               | Climatologist, environmental journalist                    | Italian Meteorological Society                                                          | Italy                                                      |
| Mercier, Manuel              | Researcher in Cognitive Neuroscience                       | CNRS                                                                                    | France                                                     |
| MERCIER, JEAN-PAUL           | naturaliste                                                |                                                                                         | France                                                     |
| Merckel, Ryan                | Lecturer                                                   | University of Pretoria                                                                  | South Africa                                               |
| Merckx, Thomas               | Postdoctoral researcher                                    | University of Oulu                                                                      | Finland                                                    |
| Mercuri, Anna Maria          | Professor                                                  | University of Modena and Reggio Emilia                                                  | Italy                                                      |
| Meredith, Don                | semi-retired conservation biologist and communicator       | freelance writer and biologist                                                          | Canada                                                     |
| Meredith, Helen              | Conservationist                                            | Amphibian Survival Alliance / Synchronicity Earth                                       | United Kingdom of Great Britain and Northern Ireland (the) |
| Meregalli, Massimo           | Researcher                                                 | University                                                                              | Italy                                                      |
| Meretsky, Vicky              | Professor of Environmental Science                         | Indiana University                                                                      | United States of America (the)                             |
| Mergan, Lucas                | PhD Student                                                | KU Leuven                                                                               | Belgium                                                    |
| Mérigot, Bastien             | Associate professor, marine biodiversity                   | Montpellllier Universtiy                                                                | France                                                     |

|                           |                                 |                                                                           |                                                            |
|---------------------------|---------------------------------|---------------------------------------------------------------------------|------------------------------------------------------------|
| Merillet, Laurene         | PhD student                     | Ifremer                                                                   | France                                                     |
| Merino, Santiago          | Professor of Research           | Higher Council for scientific research (Spain)                            | Spain                                                      |
| Merino Recalde, Nilo      | PhD student                     | University of Oxford                                                      | United Kingdom of Great Britain and Northern Ireland (the) |
| Merino-Ibarra, Martin     | Senior Researcher               | Marine Science and Limnology Institute, UNAM                              | Mexico                                                     |
| Merino-Martín, Luis       | Postdoctoral Researcher         |                                                                           | France                                                     |
| Merkel, Fabian            | PhD student                     | EMBL                                                                      | Germany                                                    |
| Merker, Stefan            | Curator of Mammals              | Staatliches Museum für Naturkunde Stuttgart                               | Germany                                                    |
| MÉROT, Claire             | Post-doc evolutionary biology   | Université Laval - Institut de Biologie Intégrative des systèmes          | Canada                                                     |
| Merquiol, Louise          | PhD Student in Marine biology   | Stazione Zoologica Anton Dohrn                                            | Italy                                                      |
| Merrey, Douglas           | Social Scientist                |                                                                           | United States of America (the)                             |
| Merrick, Melissa          | Assistant Research Scientist    | University of Arizona                                                     | United States of America (the)                             |
| Merritt, Robert           | Climate Change project manager  | Conservation International                                                | United States of America (the)                             |
| Merselis, Daniel          | Instructor / Coral Biologist    | Florida International University                                          | United States of America (the)                             |
| Mertens, Kewan            | post-doctoral researcher        | Vrije Universiteit Brussel                                                | Belgium                                                    |
| Mertens, Stephan          | managing editor/biologist       | Deutsches Ärzteblatt (German Medical Journal)                             | Germany                                                    |
| Mertin, Paul              |                                 | University of Kassel                                                      | Germany                                                    |
| Mertz, Keiko              | Graduate Student Researcher     | University of California, Davis                                           | United States of America (the)                             |
| Mesa, Oscar               | Professor, Hydrology            | Universidad Nacional de Colombia                                          | Colombia                                                   |
| Mesléard, François        | Research Director/Professor     | Tour du Valat Insitute/Avignon University                                 | France                                                     |
| Mesnager, Robin           | Computational toxicologist      | King's College London                                                     | United Kingdom of Great Britain and Northern Ireland (the) |
| Mesquita, Geison          | Researcher                      | Universitat Autònoma de Barcelona                                         | Spain                                                      |
| Mesquita Neto, José       | Profesor/Biology                | Universidad Católica del Maule                                            | Chile                                                      |
| Mesquita-Joanes, Francesc | Associate Professor of Ecology  | University of Valencia                                                    | Spain                                                      |
| Messal, Mandy             | PhD Candidate Genetics          | Forestry and Agricultural Biotechnology Institute, University of Pretoria | South Africa                                               |
| Messer, Lauren            | Postdoctoral Fellow             | University of Queensland                                                  | Australia                                                  |
| Messerschmid, Thibaud     | PhD student / Botany            | Johannes Gutenberg University Mainz                                       | Germany                                                    |
| Messier, Christian        | Professor of forest ecology     | UQAM and UQO                                                              | Canada                                                     |
| Mestdag, Sebastiaan       | Postdoctoral researcher         | Royal Netherlands Institute of Sea Research                               | Netherlands (the)                                          |
| Mestre, Mireia            | PostDoc                         | Universidad de Concepción                                                 | Chile                                                      |
| Mestre, Frederico         | Posdoc researcher/Biogeography  | "Rui Nabeiro" Biodiversity Chair, MED Institute, University of Évora      | Portugal                                                   |
| Mestre Arias, Laia        |                                 | University of Koblenz-Landau                                              | Germany                                                    |
| Mestres, Francesc         | Associate Professor of Genetics | Universitat de Barcelona                                                  | Spain                                                      |
| Metcalfe, Jacqueline      | Founder & Director              | Poaching Prevention                                                       | United Kingdom of Great Britain and Northern Ireland (the) |
| Metón, Isidoro            | Associate Professor             | University of Barcelona                                                   | Spain                                                      |
| Metrustry, Rachael        | Public Health                   | London School of Hygiene and Tropical Medicine                            | Ireland                                                    |
| Mettouris, Onoufrios      | Biologist                       |                                                                           | Cyprus                                                     |

|                      |                                                                   |                                                            |                                |
|----------------------|-------------------------------------------------------------------|------------------------------------------------------------|--------------------------------|
| Metzker, Thiago      | CEO                                                               | IBAM - Instituto Bem Ambiental                             | Brazil                         |
| Metzl, Nicolas       | Senior Scientist, Dr., Oceanography                               | LOCEAN-IPSL, CNRS                                          | France                         |
| Metzler, Glenn       | Biologist, Habitat Conservation and Endangered Species Management | Consultant                                                 | United States of America (the) |
| Metzner, Karin       | Principal Investigator, Virology                                  | University of Zurich                                       | Switzerland                    |
| Metzner, Christoph   | PostDoc/Visiting Lecturer Computational Neuroscience              | Technische Universität Berlin                              | Germany                        |
| Meulé, Samuel        | Associate Professor in Coastal Dynamics                           | Aix-Marseille University                                   | France                         |
| Meunier, Cécile      | PhD, Evolutionary biology                                         | University of Rennes 1                                     | France                         |
| Mevenkamp, Manfred   | Professor (Electrical Engineering)                                | University of Applied Sciences Bremen                      | Germany                        |
| Mey, Eberhard        | Research assosiate, Zoology                                       | Martin-Luther-University Halle-Wittenberg                  | Germany                        |
| Meyer, Denise        | Researcher (Business Psychologist)                                | Reutlingen University                                      | Germany                        |
| Meyer, Vera          | Head of the Department of Applied and Molecular Microbiology      | Technische Universität Berlin, Institute of Biotechnology  | Germany                        |
| Meyer, Carsten       | Head of Macroecology & Society Group                              | German Centre for Integrative Biodiversity Research (iDiv) | Germany                        |
| Meyer, Katrin        | Senior Lecturer and Researcher                                    | University of Goettingen                                   | Germany                        |
| Meyer, Christian     | Professor for Palaeoecology                                       | Departement of Environmental Sciences, University of Basel | Switzerland                    |
| Meyer, Amelie        | Research Fellow                                                   | University of Tasmania                                     | Australia                      |
| Meyer, Michel        | Geologist - Geothermal Energy development                         | Services Industriels de Genève                             | Switzerland                    |
| Meyer, Andreas       | Professor                                                         | Universidade Estadual do Paraná                            | Brazil                         |
| Meyer, Holger        | Associate Professor and Director of Physics                       | Wichita State University                                   | United States of America (the) |
| Meyer, Grant         | Professor Emeritus                                                | University of New Mexico                                   | United States of America (the) |
| Meyer, Nicole        | Astrophysics                                                      | CNRS                                                       | France                         |
| Meyer, Svenja        | Soil Biology reseacher                                            | University Goettingen                                      | Germany                        |
| Meyer-Lohmann, Sönke | Psychologist / Psychotherapist                                    |                                                            | Germany                        |
| Meyer-Lucht, Yvonne  | Evolutionary biologist, PhD                                       | Uppsala University                                         | Sweden                         |
| Meyer-Vernet, Nicole | Astrophysics                                                      | CNRS/Observatoire de Paris                                 | France                         |
| Meynard, Christine   | Researcher                                                        | INRA                                                       | France                         |
| Meys, Joris          | Statistician                                                      | Ghent university                                           | Belgium                        |
| Meza-Vargas, Vanessa | Ichthyologist                                                     | Museo de Historia Natural - UNMSM (MUSM)                   | Peru                           |
| Meziti, Alexandra    | Environmental Microbiologist                                      |                                                            | Greece                         |
| Mezon, Cécile        | Geophysics                                                        | Amoncompte                                                 | France                         |
| Mialon, Arnaud       | research                                                          | CESBIO                                                     | France                         |
| Michael, Pamela      | Spacio-temporal marine ecology                                    |                                                            | United States of America (the) |
| Michalak, Rudi       | Senior Lecturer, Physics and Astronomy                            | University of Wyoming                                      | United States of America (the) |
| Michalczyk, Łukasz   | Associate Professor/Biology                                       | Jagiellonian University                                    | Poland                         |
| Michalik, Tanja      | PhD in Geosciences/Planetology                                    | German Aerospace Center                                    | Germany                        |
| Michalovič, Matúš    | Assistant professor                                               | Comenius University in Bratislava, Faculty of Law          | Slovakia                       |
| Micheau, Jacques     | Professor in Neuroscience                                         | University of Bordeaux                                     | France                         |
| Michel, Veronique    | Researcher CNRS                                                   | CNRS                                                       | France                         |

|                        |                                                                         |                                                                       |                                                               |
|------------------------|-------------------------------------------------------------------------|-----------------------------------------------------------------------|---------------------------------------------------------------|
| Michel, Alice          | MSc in Biology                                                          | Uppsala University                                                    | United States of America (the)                                |
| Michel, Magny          | DR-CNRS émérite -<br>palaeoclimatology/palaeoenvironment                | CNRS                                                                  | France                                                        |
| Michel, Gabriela       | postdoctoral researcher                                                 | Institute of Neuroinformatics UZH/ETH Zurich                          | Switzerland                                                   |
| Michel, Niklas         | Postdoc, Neurophysiology                                                | Max Planck Institute of Experimental Medicine                         | Germany                                                       |
| Michel, Nicole         | Senior Quantitative Ecologist                                           | National Audubon Society                                              | United States of America (the)                                |
| Michell, Rhiannon      | Masters of Science (Zoology)                                            | The University of Melbourne                                           | Australia                                                     |
| Michetti, Melania      | Researcher in Environmental Economics                                   | ENEA                                                                  | Italy                                                         |
| Mickiewicz, Katarzyna  | Faculty Fellow/ microbiologist                                          | Newcastle University                                                  | United Kingdom of Great Britain<br>and Northern Ireland (the) |
| Middendorf, George     | Professor of Biology                                                    | Howard University                                                     | United States of America (the)                                |
| Middleton, Helen       | Cluster Archive Scientist                                               | ESA                                                                   | Spain                                                         |
| Midlane, Neil          | Group Sustainability Manager                                            | Wilderness Safaris                                                    | South Africa                                                  |
| Mielcarek, Nathalie    | Director of Research                                                    | Inserm                                                                | France                                                        |
| Miele, Vincent         | Research Engineer / Ecological networks                                 | CNRS - Biometry & Evolutionary Biology laboratory                     | France                                                        |
| Mietchen, Daniel       | Data scientist                                                          | Data Science Institute, University of Virginia                        | United States of America (the)                                |
| Miftari, Iliriana      | Dr.agr.                                                                 | University of Prishtina                                               | Albania                                                       |
| Migale, Roberta        | Postdoctoral Fellow                                                     | The Francis Crick Institute                                           | United Kingdom of Great Britain<br>and Northern Ireland (the) |
| Mignon-Risse, Raphaël  | PhD Student                                                             | AIM, Université Paris-Diderot                                         | France                                                        |
| Mignot, Juliette       | Oceanographer                                                           | IRD/IPSL/LOCEAN                                                       | France                                                        |
| Migura-Garcia, Lourdes | Recherche/microbiology                                                  | IRTA-CReSA                                                            | Spain                                                         |
| Mihaychuk, James       | Physicist                                                               | Silktember Corporation                                                | Canada                                                        |
| Mihoub, Jean-Baptiste  | Lecturer in Ecology                                                     | Sorbonne Université                                                   | France                                                        |
| Miinalainen, Tuuli     | PhD Student / Aerosol research group                                    | University of Eastern Finland                                         | Finland                                                       |
| Mikac, Stjepan         | Vice Dean for Sci.Researches                                            | University of Zagreb Faculty of Forestry                              | Croatia                                                       |
| Mikolajczyk, Lukasz    | Researcher / Nature conservation                                        | The Institute of Nature Conservation, Polish Academy<br>of Sciences   | Poland                                                        |
| Mikos, Matjaz          | Dean of Faculty and Professor of Hydrology and<br>Hydraulic Engineering | University of Ljubljana, Faculty of Civil and Geodetic<br>Engineering | Slovenia                                                      |
| Mikulski, Andrzej      | Assistant Professor                                                     | University of Warsaw                                                  | Poland                                                        |
| Mikusinski, Grzegorz   | Associate Professor/Conservation science                                | Swedish University of Agricultural Sciences SLU                       | Sweden                                                        |
| Mila, Borja            | Research scientist                                                      | Consejo Superior de Investigaciones Cientificas                       | Spain                                                         |
| Miladinova, Irena      | Post-Doc                                                                | University of Graz                                                    | Austria                                                       |
| Milagres, Adriana      | PhD student                                                             | Universidade Federal de Lavras                                        | Brazil                                                        |
| MILAGRES, ADRIANA      | Collaborating Researcher                                                | Universidade Federal de Viçosa                                        | Brazil                                                        |
| Milani, Cristina       | Marine biologist                                                        | Hvalsafari Andenes                                                    | Norway                                                        |
| Milanovic, Marija      | Doctoral researcher in Macroecology                                     | Helmholtz-Centre for Environmental Research - UFZ                     | Germany                                                       |
| Milburn, Stuart        | Oceanographer                                                           | UNSW Sydney                                                           | Australia                                                     |
| Milcu, Alexandru       | Researcher                                                              | CNRS Ecotron                                                          | France                                                        |
| Milde, Petra           | Professor                                                               | Bremerhaven University of Applied Sciences                            | Germany                                                       |
| Mildrexler, David      | Ecologist                                                               | Eastern Oregon Legacy Lands                                           | United States of America (the)                                |

|                       |                                                                                                                                                                        |                                                                    |                                                            |
|-----------------------|------------------------------------------------------------------------------------------------------------------------------------------------------------------------|--------------------------------------------------------------------|------------------------------------------------------------|
| Milec, Leona          | PhD candidate in Biology                                                                                                                                               | Nord University                                                    | Norway                                                     |
| Milenkaya, Olga       | Professor of Conservation Biology                                                                                                                                      | Warren Wilson College                                              | United States of America (the)                             |
| Miles, Katie          | PhD Candidate in Glaciology                                                                                                                                            | Aberystwyth University                                             | United Kingdom of Great Britain and Northern Ireland (the) |
| Miles, Donald         | Professor                                                                                                                                                              | Ohio University                                                    | United States of America (the)                             |
| Milhorance, Carolina  | Researcher in Political Science and Sustainable Development                                                                                                            | University of Brasilia                                             | Brazil                                                     |
| Miličić, Marija       | Research Associate                                                                                                                                                     | BioSense Institute                                                 | Serbia                                                     |
| milinkovitch, thomas  |                                                                                                                                                                        | université de la rochelle                                          | France                                                     |
| Militon, Cecile       | Associate professor - Marine microbial ecology                                                                                                                         | Aix-Marseille University - Mediterranean Institute of Oceanography | France                                                     |
| Mill, Aileen          | Senior Lecturer                                                                                                                                                        | Newcastle Univeristy                                               | United Kingdom of Great Britain and Northern Ireland (the) |
| Milla, Ruben          |                                                                                                                                                                        | Universidad Rey Juan Carlos                                        | Spain                                                      |
| Millan, Andres        |                                                                                                                                                                        | Murcia University                                                  | Spain                                                      |
| Millan Agudo, Lucia   | Conservation Biologist                                                                                                                                                 |                                                                    | Spain                                                      |
| Millard, Joseph       | PhD student (pollinator biodiversity change)                                                                                                                           | University College London                                          | United Kingdom of Great Britain and Northern Ireland (the) |
| Millat Martinez, Pere | Medical research fellow                                                                                                                                                | ISGlobal                                                           | Spain                                                      |
| Miller, Michael       | Licensed Civil Engineer                                                                                                                                                | States of California (#85418) and Hawaii (#15510)                  | United States of America (the)                             |
| Miller, Wolfgang      | Ass. Prof.                                                                                                                                                             | Medical University of Vienna                                       | Austria                                                    |
| Miller, Evonne        | Professor of Design Psychology                                                                                                                                         | QUT                                                                | Australia                                                  |
| Miller, John          | Technical Director, 3M Company and EVP of Operations, Real Industry (retired)                                                                                          | University of Wisconsin-Madison, PhD Chem Eng                      | United States of America (the)                             |
| Miller, Charles B.    | Professor Emeritus of Oceanography                                                                                                                                     | Oregon State University                                            | United States of America (the)                             |
| Miller, Matthew       | PhD Student - Ocean Sciences                                                                                                                                           | University of Victoria                                             | Canada                                                     |
| Miller, Quinn         | Genetic technologist                                                                                                                                                   | Nationwide children's hospital                                     | United States of America (the)                             |
| Miller, Brian         | Conservation Biology                                                                                                                                                   | Dr.                                                                | United States of America (the)                             |
| Miller, Barbara       | Professor of sociocultural anthropology                                                                                                                                | George Washington University                                       | United States of America (the)                             |
| Miller, Margaret      | Research Director/Coral Ecologist                                                                                                                                      | SECORE Int                                                         | United States of America (the)                             |
| Miller, Emiline       | Masters student                                                                                                                                                        | University of the Western Cape                                     | South Africa                                               |
| Miller, Fiona         | Professor & Chair in Health Management Strategies                                                                                                                      | University of Toronto, Dalla Lana School of Public Health          | Canada                                                     |
| Miller, Jennie        | Senior Scientist                                                                                                                                                       | Defenders of Wildlife                                              | United States of America (the)                             |
| Miller, Ian           | PhD Candidate                                                                                                                                                          | Princeton University and the Rocky Mountain Biological Laboratory  | United States of America (the)                             |
| Miller, Kathryn       | Independent science consultant, Greenpeace Research Laboratories / Honorary Associate Research Fellow College of Life and Environmental Sciences, University of Exeter | Greenpeace Research Laboratories / University of Exeter            | United Kingdom of Great Britain and Northern Ireland (the) |
| Miller, Lee           | Fisheries Biologist (Retired)                                                                                                                                          | California Department of Fish and Wildlife                         | United States of America (the)                             |
| Milleret, Cyril       | Postdoc                                                                                                                                                                | norwegian university of life sciences                              | Norway                                                     |
| Millet, Laurent       | Molecular biologist                                                                                                                                                    | IRD                                                                | New Caledonia                                              |

|                                         |                                                            |                                                                                         |                                                               |
|-----------------------------------------|------------------------------------------------------------|-----------------------------------------------------------------------------------------|---------------------------------------------------------------|
| Millhouser, Paul                        | Landscape Ecologist/GIS Specialist                         | Rocky Mountain Wild                                                                     | United States of America (the)                                |
| MILLON-FAURE, Karine                    | Maître de conférence en didactique des mathématiques       | Aix-Marseille Université (FRANCE)                                                       | France                                                        |
| Mills, Gus                              | Ecologist                                                  | School of Biology and Environmental Sciences,<br>University of Mpumalanga, South Africa | South Africa                                                  |
| Milne, Eleanor                          | Coordinator The carbon Benefits Project                    | Colorado State University                                                               | United Kingdom of Great Britain<br>and Northern Ireland (the) |
| milo, ron                               | Prof. plant & Env. Sciences                                | Weizmann Institute of Science                                                           | Israel                                                        |
| Milodowski, David                       | Postdoctoral researcher, Ecology and Remote Sensing        | University of Edinburgh                                                                 | United Kingdom of Great Britain<br>and Northern Ireland (the) |
| Milon, Emilie                           | Marine biologist                                           | Centre de la Mer de Biarritz                                                            | France                                                        |
| Milrs, Albie                            | Assistant Professor, Sustainable Community Food<br>Systems | University of Hawaii- West Oahu                                                         | United States of America (the)                                |
| Milton, Randy                           | Ecologist                                                  | Nova Scotia Dept. Lands and Forestry                                                    | Canada                                                        |
| Milton, Suzanne J                       | Plant ecologist                                            | Wolwekraal Conservation and research Organisation                                       | South Africa                                                  |
| Milward, Adrienne                       | Professor                                                  | The University of Newcastle                                                             | Australia                                                     |
| Milz, Tim                               | Biology                                                    | JGU Mainz                                                                               | Germany                                                       |
| Miñarro, Sara                           | Postdoctoral researcher in Marine Ecology                  | Autonomous University of Barcelona                                                      | Spain                                                         |
| Miñarro Acosta, Eva                     | Researcher and technician (environment)                    | Work, Economic and Social Council of Catalonia                                          | Spain                                                         |
| Minaudo, Camille                        | Postdoc fellow in ecohydrology                             | Swiss Federal Institute of Technology EPFL                                              | Switzerland                                                   |
| Mincarone, Michael                      | Professor / Zoology                                        | Universidade Federal do Rio de Janeiro                                                  | Brazil                                                        |
| Minchin, Peter                          | Principal Scientist, Plant Physiology                      | Plant and Food Research                                                                 | New Zealand                                                   |
| Mincke, Jens                            | PhD Candidate in Ecophysiology                             | Ghent University                                                                        | Belgium                                                       |
| Minnett, Jessica                        | PhD Researcher                                             | Swansea University                                                                      | United Kingdom of Great Britain<br>and Northern Ireland (the) |
| Minguez, Laetitia                       | Researcher / Ecotoxicology                                 | CNRS                                                                                    | France                                                        |
| Minier, Christophe                      | Professor / Ecotoxicology                                  | Normandie University                                                                    | France                                                        |
| Minnich, Aljoscha Jan Philipp           | PhD candidate                                              | Universität Hamburg                                                                     | Germany                                                       |
| Minns, Charles K.                       | Adj. Professor of Freshwater Ecology                       | University of Toronto                                                                   | Canada                                                        |
| Miño, Carolina                          | Conservation Genetics                                      | Instituto de Biología Subtropical - Nodo Posadas,<br>UNaM/ CONICET                      | Argentina                                                     |
| Minot, Joanne                           | Ecologist                                                  | Sharpless Services                                                                      | United States of America (the)                                |
| Minshall, Timothy                       | MSc Student                                                | University of East Anglia                                                               | United Kingdom of Great Britain<br>and Northern Ireland (the) |
| Minteguiaga Carbajal, Manuel<br>Agustin | Researcher                                                 | University of the Republic (UdelaR)                                                     | Uruguay                                                       |
| Minter, Melissa                         | PhD in climate change ecology                              | University of York                                                                      | United Kingdom of Great Britain<br>and Northern Ireland (the) |
| Miraldo, Andreia                        | Researcher                                                 | Naturhistoriska riksmuseet                                                              | Sweden                                                        |
| Miramontes, Octavio                     | Full time researcher - Biocomplexity                       | Universidad Nacional Autónoma de México                                                 | Mexico                                                        |
| Miranda, Paulo                          | Associate Professor of Physics                             | University of Sao Paulo                                                                 | Brazil                                                        |
| Mireles, Alejandra                      | Biologist - Phycology                                      | UNAM                                                                                    | Mexico                                                        |
| Miró, Alexandre                         | Researcher                                                 |                                                                                         | Spain                                                         |

|                             |                                                     |                                                                       |                                                            |
|-----------------------------|-----------------------------------------------------|-----------------------------------------------------------------------|------------------------------------------------------------|
| Mirowski, Piotr             | Staff Research Scientist                            | DeepMind                                                              | United Kingdom of Great Britain and Northern Ireland (the) |
| Mirrashidi, Kathleen        | Microbiology, immunology & Molecular Genetics       |                                                                       | United States of America (the)                             |
| Mischke, Steffen            | Professor of Geology                                | University of Iceland                                                 | Iceland                                                    |
| Misguich, Grégoire          | Physicist                                           | Commissariat à l' énergie atomique et aux énergies alternatives (CEA) | France                                                     |
| Misguich, Jacques           | Senior physicist Theoretical physics and Chaos      | Commissariat à l'Energie Atomique C.E.A.                              | France                                                     |
| Mishler, Brent              | Professor                                           | University of California, Berkeley                                    | United States of America (the)                             |
| Mishra, Priyanka            | Plant science                                       | MPIPZ                                                                 | Germany                                                    |
| Mishra, Rashmish            | Researcher in Theoretical Particle Physics          | Scuola Normale Superiore, Pisa, Italy                                 | Italy                                                      |
| Mishra, Anamika             | Scientist                                           | Czech Academy Of Sciences                                             | Czech Republic (the)                                       |
| Mishra, Kumud Bandhu        | Scientist                                           | Global Change Research Institute                                      | Czech Republic (the)                                       |
| Misslin, Renaud             | Postdoc geography/agronomy                          | INRA                                                                  | France                                                     |
| Mitchard, Edward T.A.       | Senior Lecturer, School of GeoSciences              | University of Edinburgh                                               | United Kingdom of Great Britain and Northern Ireland (the) |
| Mitchell, Randy             | Professor of Biology                                | University of Akron                                                   | United States of America (the)                             |
| Mitchell, Kelly             | Cryptocurrency trader / writer                      | Amazix                                                                | Canada                                                     |
| Mitchell, Andrew            | Environmental Social Science                        |                                                                       | United Kingdom of Great Britain and Northern Ireland (the) |
| Mitchell-Olds, Thomas       | Professor of Biology                                | Duke University                                                       | United States of America (the)                             |
| Mitiki, Anteneh             | Research assistant                                  | Addis Ababa University                                                | Ethiopia                                                   |
| Mitri, Sara                 | Assistant Professor in Microbiology                 | University of Lausanne                                                | Switzerland                                                |
| Mittal, Neha                | Research Fellow                                     | University of Leeds                                                   | United Kingdom of Great Britain and Northern Ireland (the) |
| Mittelbach, Moritz          | Ecology                                             |                                                                       | Germany                                                    |
| Mitten, Stephen             | Advanced Lecturer in Environmental Science          | Loyola University Chicago                                             | United States of America (the)                             |
| Mix, Alan                   | Professor of Earth, Ocean, and Atmospheric Sciences | Oregon State University                                               | United States of America (the)                             |
| Miyaki, Cristina            | Associate Professor                                 | Universidade de São Paulo                                             | Brazil                                                     |
| mobini, sahba               | Postdoctoral Researcher - MSCA_IF                   | IMN-CSIC                                                              | Spain                                                      |
| Möbs, Jakob                 | PhD Student / Chemistry                             | Philipps-Universität Marburg, Fachbereich Chemie                      | Germany                                                    |
| Mochan, W Luis              | Investigador Titular, ICF                           | Universidad Nacional Autónoma de México                               | Mexico                                                     |
| Mocilnikar, Antoine-Tristan | PhD Mathematics                                     | PEPS                                                                  | France                                                     |
| Mock, Douglas               | George Lynn Cross Research Professor Emeritus       | University of Oklahoma                                                | United States of America (the)                             |
| Modi, Albert                | Crop Science                                        | University of KwaZulu_Natal                                           | South Africa                                               |
| Moe, Jannicke               | Senior Researcher                                   | Norwegian Institute for Water Research                                | Norway                                                     |
| Moehrenschrager, Axel       | Director of Conservation & Science                  | Calgary Zoological Society                                            | Canada                                                     |
| Moehs, Charles              | Plant Genetics                                      |                                                                       | United States of America (the)                             |
| Moen, Jon                   | Professor Ecology                                   | Umeå University                                                       | Sweden                                                     |
| Moeris, Samuel              | PhD Researcher (Ecotoxicology)                      | Ghent University                                                      | Belgium                                                    |
| Moffat, Jennica             | Graduate Student                                    | California State University, Northridge                               | United States of America (the)                             |
| Moffat, Ryssa               | PhD candidate, Cognitive Science                    | Macquarie University                                                  | Australia                                                  |
| Mohamed, Kamal              | Professor and Director of Rice Creek Field Station  | SUNY at Oswego                                                        | United States of America (the)                             |

|                             |                                                                  |                                                                                                                      |                                |
|-----------------------------|------------------------------------------------------------------|----------------------------------------------------------------------------------------------------------------------|--------------------------------|
| Mohanlal, Shanice           | Environmental and Water Science                                  | University of the Western Cape                                                                                       | South Africa                   |
| Mohanty, Jitendra           | Former Sr. Principal Scientist                                   | CSIR-Institute of Minerals & Materials Technology                                                                    | India                          |
| Mohapatra, Souryabrata      | Research Associate, Department of Liberal Arts (Field-Economics) | Indian Institute of Technology Hyderabad                                                                             | India                          |
| Möhler, Henrike             | Ecology                                                          | Kiel University                                                                                                      | Germany                        |
| Mohr, Franziska             | PhD Geography                                                    | WSL                                                                                                                  | Switzerland                    |
| Mohr, Christine             | Professor Psychology                                             | University of Lausanne                                                                                               | Switzerland                    |
| Mohren, Frits               | Professor of Forest Ecology and Forest Management                | Wageningen University                                                                                                | Netherlands (the)              |
| Mohsen, Osama               | PhD student, Physics                                             | Northern Illinois University                                                                                         | United States of America (the) |
| Moinet, Marie               | epidemiologist                                                   | Massey University                                                                                                    | New Zealand                    |
| Moiroux, Nicolas            | Researcher, medical entomology                                   | Institut de Recherche pour le Développement (IRD)                                                                    | France                         |
| Moizo, Bernard              | Senior Social Anthropologist, head of Lab                        | Institute for Research and Sustainable Development (IRD-France)                                                      | France                         |
| Mojica Piscioti, Mary Luz   | Postdoctoral Researcher                                          |                                                                                                                      | Czech Republic (the)           |
| Mojzeš, Peter               | Associate professor / Biophysics                                 | Charles University, Faculty of Mathematics and Physics                                                               | Czech Republic (the)           |
| Mokus, Nico                 | PhD student, sea ice science                                     | University of Otago                                                                                                  | New Zealand                    |
| Mol, Jolanta                | Biology teacher                                                  | Upper Secondary School                                                                                               | Poland                         |
| Molander, Sverker           | Full Professor of Environmental Systems and Risk                 | Environmental Systems Analysis, Department of Technology Management and Economics, Chalmers University of Technology | Sweden                         |
| Moldan, Bedřich             | Professor environmental sciences                                 | Charles University                                                                                                   | Czech Republic (the)           |
| Moldes, Óscar A.            | Physical Chemistry                                               | University of Vigo                                                                                                   | Spain                          |
| Molewa, Dineo               | Medical Virology                                                 | University of Pretoria                                                                                               | South Africa                   |
| Mölg, Nico                  | PhD Candidate, Geography                                         | University of Zurich                                                                                                 | Switzerland                    |
| Molia, Sophie               | Veterinary epidemiology                                          | CIRAD                                                                                                                | France                         |
| Molina, Ana                 | Botanist                                                         | University of León (Spain)                                                                                           | Spain                          |
| Molina, Marco               | Fundador Representante RAIS AC                                   | Redes de Apoyo Inteligente y Sostenido AC                                                                            | Mexico                         |
| Molina, Ariel de Andrade    | PhD student in Tropical Botany                                   | INPA - Amazonian National Institute in Research                                                                      | Brazil                         |
| Molina Frenier, Francisco   | Professor/Ecology                                                | Universidad Nacional Autónoma de México                                                                              | Mexico                         |
| Molina Torres, Jorge        | Researcher Plants Biochemistry                                   | CINVESTAV U. Irapuato                                                                                                | Mexico                         |
| Molina-García, Alejandro    | PhD, Leadership on Health and Climate Change                     | Ministry of Health at Michoacan State                                                                                | Mexico                         |
| Molina-Henao, Edward Hernan | Researcher                                                       | Universidad del Valle                                                                                                | Colombia                       |
| Molina-Navarro, Eugenio     | Assistant Professor in External Geodynamics                      | University of Alcalá                                                                                                 | Spain                          |
| Molina-Venegas, Rafael      | Postdoctoral researcher in (plant) Ecology and Evolution         | University of Alcalá                                                                                                 | Spain                          |
| Molinari, Sergio            | Research Director - Astrophysics                                 | Istituto Nazionale di Astrofisica (INAF)                                                                             | Italy                          |
| Molinari-Jobin, Anja        | Conservation Biologist                                           | Progetto Lince Italia                                                                                                | Italy                          |
| Molinas-González, Carlos R. | PhD-Student                                                      | University of Granada                                                                                                | Paraguay                       |
| Molinero, Jon               | Lecturer Researcher                                              | Pontificia Universidad Católica del Ecuador                                                                          | Ecuador                        |
| Molinié, Gilles             | Professor/organic farmer                                         | IGE                                                                                                                  | France                         |
| Molino, Jean-François       | Senior Scientist, Tropical Ecology                               | IRD                                                                                                                  | France                         |

|                             |                                                                                    |                                                                                  |                                                            |
|-----------------------------|------------------------------------------------------------------------------------|----------------------------------------------------------------------------------|------------------------------------------------------------|
| Moll, Eugene                | Extraordinary Professor in the Department of Biodiversity and Conservation Biology | University of the Western Cape                                                   | South Africa                                               |
| Mollá, Salvador             | Profesor Titular de Universidad                                                    | Universidad Autonoma de Madrid                                                   | Spain                                                      |
| Möller, Moritz              | PhD Student, Computational Neuroscience                                            | University of Oxford                                                             | United Kingdom of Great Britain and Northern Ireland (the) |
| Mollison, Ewan              | Postdoctoral Research Associate, Evolutionary Biology                              | University of Edinburgh                                                          | United Kingdom of Great Britain and Northern Ireland (the) |
| Moloney, Coleen             | Associate Professor, Marine ecologist                                              | University of Cape Town                                                          | South Africa                                               |
| Mols, Bjorn                 | PhD student Ecology                                                                | University of Groningen                                                          | Netherlands (the)                                          |
| Mombrial, Florian           | Biologiste                                                                         | Conservatoire et jardin botaniques de la Ville de Genève                         | Switzerland                                                |
| Mömken, Julia               | Postdoc                                                                            | Institute of Meteorology and Climate Research, Karlsruhe Institute of Technology | Germany                                                    |
| Mommer, Liesje              | Full Professor Plant Ecology                                                       | Wageningen University                                                            | Netherlands (the)                                          |
| Monachello, Dario           | Biology                                                                            | INRA                                                                             | France                                                     |
| Monaco, Andrea              | Public Officer - Biodiversity Conservation Unit                                    | Lazio Regional Government                                                        | Italy                                                      |
| Monaco, Daniela             | Postdoctoral Fellow                                                                | Emory University                                                                 | United States of America (the)                             |
| Moncef, Masmoudi            | Professor                                                                          | National Institute of Agronomy of Tunisia / University of Carthage               | Tunisia                                                    |
| Monchalin, Renee            | Assistant professor                                                                | University of Victoria                                                           | Canada                                                     |
| Monchanin, Coline           | PhD student                                                                        | Research Center on Animal Cognition                                              | France                                                     |
| Moncrieff, Glenn            | Ecologist                                                                          | South African Environmental Observation Network                                  | South Africa                                               |
| Mondal, Himadri             | Scientist A                                                                        | Bombay Natural History Society                                                   | India                                                      |
| Mondardini, Rosy            |                                                                                    | Citizen Science Center Zurich                                                    | Switzerland                                                |
| Mondet, Boris               | PhD in Engineering Acoustics                                                       | Technical University of Denmark                                                  | Denmark                                                    |
| Mondet, Fanny               | Researcher                                                                         | INRA                                                                             | France                                                     |
| Mondino, Cristina           | PhD candidate in physics                                                           | New York University                                                              | United States of America (the)                             |
| Mondino, Elena              | PhD candidate in Environmental Analysis                                            | Uppsala University                                                               | Sweden                                                     |
| Monier, Cyril               | Searcher Neuroscience                                                              | CNRS                                                                             | France                                                     |
| Monismith, Stephen          | Professor of Civil and Environmental Engineering                                   | Stanford University                                                              | United States of America (the)                             |
| Monk, Julia                 | Ph.D. Candidate in Ecology                                                         | Yale School of Forestry and Environmental Studies                                | United States of America (the)                             |
| Mönkkönen, Mikko            | Professor                                                                          | University of Jyväskylä                                                          | Finland                                                    |
| MONMANY GARZIA, A. Carolina |                                                                                    | CONICET-UNT                                                                      | Argentina                                                  |
| Monnahan, Cole              | Researcher in Quantitative Ecology                                                 | University of Washington                                                         | United States of America (the)                             |
| Monneau, Yoan               | Researcher in structural biology                                                   | Institute of Analytical Science                                                  | France                                                     |
| Monnier, Benjamin           | Engineer                                                                           | Museum National d'Histoire Naturel                                               | France                                                     |
| Monnin, Thibaud             | Research Director                                                                  | CNRS / Sorbonne Université, Paris                                                | France                                                     |
| Monrós, Juan S.             | Professor of Ecology                                                               | University of Valencia                                                           | Spain                                                      |
| Monsees, Hendrik            | PostDoc, Aquaculture and Aquaponics                                                | Leibniz-Institute of Freshwater Ecology and Inland Fisheries                     | Germany                                                    |
| Monsel, Juliette            | Physics                                                                            | Univ. Grenoble Alpes                                                             | France                                                     |
| Monsigny, Michel            | Professor Biochemistry                                                             | University of Orléans France                                                     | France                                                     |

|                               |                                                                                |                                                                      |                                                            |
|-------------------------------|--------------------------------------------------------------------------------|----------------------------------------------------------------------|------------------------------------------------------------|
| MONTAGGIONI, LUCIEN           | Professor Emeritus of Geosciences                                              | Aix-Marseille University                                             | France                                                     |
| Montagna, Paolo               | Researcher                                                                     | Institute of Polar Sciences                                          | Italy                                                      |
| Montagnani, Giovanni Ludovico | Researcher in Nuclear Electronics                                              | Politecnico di Milano                                                | Italy                                                      |
| Montagnat, Maurine            | Researcher / Glaciology                                                        | CNRS                                                                 | France                                                     |
| Montagnoli, Antonio           | Researcher in Environmental and Applied Botany                                 | University of Insubria, Department of Biotechnology and Life Science | Italy                                                      |
| Montalban-Lopez, Manuel       | Associate Professor                                                            | University of Granada                                                | Spain                                                      |
| Montana, Quinn                | Geography                                                                      | UARK                                                                 | United States of America (the)                             |
| Montant, Marie                | neurosciences                                                                  | university AMU                                                       | France                                                     |
| Montefalcone, Monica          | Researcher                                                                     | University of Genoa                                                  | Italy                                                      |
| Monteiro, Alexandra           | Environmental researcher                                                       | University of Aveiro                                                 | Portugal                                                   |
| Monteiro Neves, Frederico     | Professor                                                                      | Southern Bahia Federal University (UFSB)                             | Brazil                                                     |
| Montejo Ráez, Arturo          | Assistant Professor                                                            | Universidad de Jaén                                                  | Spain                                                      |
| Montenegro, Maywa             | UC President's Postdoctoral Fellow                                             | UC Davis, Department of Human Ecology                                | United States of America (the)                             |
| Monteoliva, Agustín           | Consultant on aquatic ecology                                                  | Ecohydros                                                            | Spain                                                      |
| Montero, Carolina             | Researcher                                                                     | CONICET                                                              | Argentina                                                  |
| Montes Vadillo, Elba María    | PhD student in Biodiversity and Project Manager in the Ibiza island Government | Valencia University and Ibiza Island Government                      | Spain                                                      |
| Montesdeoca-Esponda, Sarah    | Postdoctoral researcher in Chemistry                                           | Universidad de Las Palmas de Gran Canaria                            | Spain                                                      |
| Montesinos, Daniel            | Senior Research Fellow                                                         | James Cook University                                                | Australia                                                  |
| Montginoul, Marielle          | Economist                                                                      | UMR G-Eau Irstea Université de Montpellier                           | France                                                     |
| Montgomerie, Robert           | Professor and Research Chair in Evolutionary Biology                           | Queen's University                                                   | Canada                                                     |
| Montgomery, Hugh              | Professor of Intensive Care Medicine                                           | University College London                                            | United Kingdom of Great Britain and Northern Ireland (the) |
| Monticelli, Patrícia Ferreira | Professor                                                                      | University of São Paulo                                              | Brazil                                                     |
| Montiel, Fabien               | Lecturer in Applied Mathematics                                                | University of Otago                                                  | New Zealand                                                |
| Montoro Girona, Miguel        | Professor in Forest Ecology                                                    | Univerisity of Quebec in Abitibi                                     | Canada                                                     |
| Montoya, Guillermo            | Professor                                                                      | NNf-CPR UNiversity of Copenhagen                                     | Denmark                                                    |
| Montoya, Eladio               | Prof. Emérito                                                                  | Universidad de Alcalá                                                | Spain                                                      |
| Montoya, José                 | Researcher / Professor                                                         | Universidad de Las Américas                                          | Ecuador                                                    |
| Montoya-Lerma, James          | Professor                                                                      |                                                                      | Colombia                                                   |
| Montpied, Pierre              | Ingénieur de recherche                                                         | INRA                                                                 | France                                                     |
| Monzon, Javier                | Ecologist                                                                      | Pepperdine University                                                | United States of America (the)                             |
| Mooi, Randall                 | Curator of Zoology                                                             | The Manitoba Museum                                                  | Canada                                                     |
| Moola, Faisal                 | Associate Professor                                                            | Department of Geography, Environment and Geomatics                   | Canada                                                     |
| Moor, Mari                    | Senior Research Fellow of Plant Ecology                                        | University of Tartu                                                  | Estonia                                                    |
| Moore, Harry                  | PhD candidate                                                                  | Charles Sturt University                                             | Australia                                                  |
| Moore, Sarah                  | Graduate Student in Biology                                                    | Indiana State University                                             | United States of America (the)                             |
| Moore, Abigail                | Marine and Fisheries Science                                                   | Universitas Hasanuddin                                               | Indonesia                                                  |
| Moore, Jared                  | Forest Researcher                                                              | Yale-NUS College                                                     | Singapore                                                  |

|                              |                                                                                                                                                                                          |                                                                  |                                                            |
|------------------------------|------------------------------------------------------------------------------------------------------------------------------------------------------------------------------------------|------------------------------------------------------------------|------------------------------------------------------------|
| Moore, Marianne              | Frost Professor Emerita in Environmental Science & Professor Emerita of Biological Sciences                                                                                              | Wellesley College                                                | United States of America (the)                             |
| Moorhouse, Tom               | Post doctoral reseacher in conservation science                                                                                                                                          | University of Oxford                                             | United Kingdom of Great Britain and Northern Ireland (the) |
| Moorman, David               | Assistant Professor                                                                                                                                                                      | University of Massachusetts Amherst                              | United States of America (the)                             |
| Mooshammer, Maria            | Postdoctoral Scholar in Ecology/Biogeochemistry                                                                                                                                          | University of California Berkeley                                | United States of America (the)                             |
| Mora Quiñones, Nidia Gloria  | Psicóloga, doctora en la línea de las Ciencias Sociales, perteneciente a los Grupos de Investigación COIDESO y ÁGORA, PSI Departamento de Psicología Social, Evolutiva y de la Educación | Universidad de Huelva                                            | Spain                                                      |
| Moradi, Shoeib               | Postdoctoral researcher                                                                                                                                                                  | Paul scherrer institute                                          | Switzerland                                                |
| Moraes, Luiz Roberto Santos  | Professor in Environmental Sanitation                                                                                                                                                    | Universidade Federal da Bahia/Federal University of Bahia        | Brazil                                                     |
| Moraes, Luiz Roberto Santos  | Professro in Environmental Sanitation                                                                                                                                                    | Federal University of Bahia                                      | Brazil                                                     |
| Morales, Hernan              | Research Fellow                                                                                                                                                                          | The University of Copenhagen                                     | Denmark                                                    |
| MORALES, JAVIER              | PhD Biology                                                                                                                                                                              | University of Salamanca                                          | Spain                                                      |
| MORALES, Javie               | PhD Biology                                                                                                                                                                              | University of Salamanca                                          | Spain                                                      |
| Morales Otero, Marian        | PhD candiate                                                                                                                                                                             | University of Lausanne                                           | Switzerland                                                |
| Morales-Baquero, Rafael      | Professor of Ecology                                                                                                                                                                     | Universidad de Granada                                           | Spain                                                      |
| Morales-Barquero, Lucia      | Land Cover and Land Cover Change                                                                                                                                                         | The University of Queensland                                     | Australia                                                  |
| Morales-Castilla, Ignacio    | Postdoctoral Fellow                                                                                                                                                                      | Universidad de Alcalá                                            | Spain                                                      |
| Morales-López, Esperanza     | Critical discourse analysis                                                                                                                                                              | University of A Coruña                                           | Spain                                                      |
| Morales-Mulia, Sandra        | Resercher in Neuroscience                                                                                                                                                                |                                                                  | Mexico                                                     |
| Morales-Reyes, Zebensui      | Postdoctoral researcher                                                                                                                                                                  | Miguel Hernández University of Elche                             | Spain                                                      |
| Moran, James                 | Lecturer in Ecology and Biology                                                                                                                                                          | Galway Mayo Institute of Technology                              | Ireland                                                    |
| Moran, Kate                  | President & CEO and Professor, Faculty of Science                                                                                                                                        | Ocean Networks Canada, University of Victoria                    | Canada                                                     |
| Morand, Serge                | DR CNRS - Health Ecology                                                                                                                                                                 | CNRS - Centre National de la Recherche Scientifique              | France                                                     |
| Morant Etxebarria, Jon       | PhD Student                                                                                                                                                                              | Aranzadi Sciences Society                                        | Spain                                                      |
| Morato, Telmo                | Senior Scientist - Marine Biology                                                                                                                                                        | IMAR - University Azores                                         | Portugal                                                   |
| Morcatty, Thais              | PhD researcher                                                                                                                                                                           | Oxford Brookes University                                        | United Kingdom of Great Britain and Northern Ireland (the) |
| Mordue, Simone               | Research Associate                                                                                                                                                                       | Newcastle University                                             | United Kingdom of Great Britain and Northern Ireland (the) |
| Moreau, Corentin             | Biologist                                                                                                                                                                                | INRA                                                             | France                                                     |
| Moreira, Márcio              | PhD student                                                                                                                                                                              | IPMA and CCMAR                                                   | Portugal                                                   |
| Moreira, Ana Paula B.        | PhD researcher                                                                                                                                                                           | Universidade Federal do Rio de Janeiro                           | Brazil                                                     |
| Moreira, Jorge               | Environmental Ethics Researcher                                                                                                                                                          | Centre for Functional Ecology - Science for People & the Planet" | Portugal                                                   |
| Moreira, Ana Paula           | PhD researcher                                                                                                                                                                           | Universidade Federal do Rio de Janeiro - UFRJ                    | Brazil                                                     |
| Moreira Pessôa, Ana Carolina | PhD Student in Remote Sensing                                                                                                                                                            | National Institute for Space Research                            | Brazil                                                     |
| Moreira-Santos, Matilde      | Researcher                                                                                                                                                                               | University of Coimbra                                            | Portugal                                                   |
| Morel, Loïs                  | Dr in Ecology                                                                                                                                                                            |                                                                  | France                                                     |

|                              |                                                          |                                                                  |                                |
|------------------------------|----------------------------------------------------------|------------------------------------------------------------------|--------------------------------|
| Morel, Jean Louis            | Professor emeritus                                       | Université de Lorraine                                           | France                         |
| Morel-Journel, Thibaut       | Postdoc Fellow                                           | INRA                                                             | France                         |
| Morellato, Patricia          | Professor of Botany                                      | UNESP                                                            | Brazil                         |
| Morellet, Nicolas            | Researcher / Ecology                                     | INRA                                                             | France                         |
| Morelli, Chiara              | Postdoc (Neuroscience)                                   |                                                                  | Italy                          |
| Morelli, Toni Lyn            | Research Ecologist                                       | U.S. Geological Survey                                           | United States of America (the) |
| Morency, Catherine           | Professor, Chaire Mobilité                               | Polytechnique Montreal                                           | Canada                         |
| Moreno, Luis                 | Assistant Professor / Human Geography                    | IGOT/CEG-ULisboa                                                 | Portugal                       |
| Moreno, Karen                | Lecturer and researcher/ Paleontology                    | Universidad Austral de Chile                                     | Chile                          |
| Moreno, Emilio               | PhD                                                      | University of Granada                                            | Spain                          |
| Moreno, Gerardo              | Professor of Soil Science and Biogeochemistry            | Universidad de Extremadura                                       | Spain                          |
| MORENO, JOSE MANUEL          | PROFESSOR OF ECOLOGY                                     | UNIVERSITY OF CASTILLA-LA MANCHA                                 | Spain                          |
| Moreno Jiménez, Eduardo      | Lecturer in Agricultural Chemistry                       | Universidad Autónoma de Madrid                                   | Spain                          |
| Moreno Lampreave, diego      | Technician Environmental Marine Program/Marine Biologist | Agencia de Medio Ambiente y Agua, Junta de Andalucía             | Spain                          |
| Moreno Mateos, David         | Ikerbasque Research Fellow                               | Basque Centre for Climate Change - BC3                           | Spain                          |
| Moreno Rincon, Juan Leonardo | MSc. Meteorology PhD (c) MARine Science                  |                                                                  | Colombia                       |
| Moreno-Casasola, Patricia    | Professor, Coastal ecology                               | Instituto de Ecología A.C.                                       | Mexico                         |
| Morera-Pujol, Virginia       | PhD student                                              | University of Barcelona                                          | Spain                          |
| Morère, Lucie                | Post-doctorante / Géographie                             | Muséum National d'Histoire Naturelle / CESCO                     | France                         |
| Morgan, Edward               | Research Fellow                                          | Griffith University                                              | Australia                      |
| Morgan, Sydney               | Ph.D. Biology                                            | The University of British Columbia                               | Canada                         |
| Morgan, William              | Professor of Biology                                     | The College of Wooster                                           | United States of America (the) |
| Morgan, Simon                | Conservation Ecologist                                   | Stanford University                                              | United States of America (the) |
| Morgan, Dave                 | Chemist                                                  | Retired                                                          | South Africa                   |
| Morgan, Arthur               | Lecturer (retired)                                       | Rhodes University                                                | South Africa                   |
| Morgan II, Dr. Raymond       | Professor Emeritus                                       | University of Maryland - UMCES                                   | United States of America (the) |
| Morgans, Courtney            | Conservation ecologist                                   | University of Queensland                                         | Australia                      |
| Morganti, Michelangelo       | Post-Doc researcher                                      | University of Milan                                              | Italy                          |
| Morgenstern, Olaf            | Principal Scientist, Atmosphere and Climate              |                                                                  | New Zealand                    |
| Mori, Emiliano               | Post Doc                                                 | University of Siena                                              | Italy                          |
| Morice, Vincent              | PhD Candidate in Computer Science                        | VERIMAG UGA CNRS Grenoble INP (Grenoble Institut of Technologie) | France                         |
| Morien, Evan                 | Microbial Ecology                                        | University of British Columbia                                   | Canada                         |
| morin, emmanuelle            | Bioinformatician                                         | French National Institute for Agricultural Research              | France                         |
| Morinay, Jennifer            | Teaching Assistant in Ecology and Evolutionary Biology   | University Claude Bernard Lyon 1                                 | France                         |
| Morissette, Lyne             | Marine Conservationist                                   | M - Expertise Marine                                             | Canada                         |
| Moritz, Roxane               | PhD student in environmental microbiology                | Université de Lausanne                                           | Switzerland                    |
| Moritz, Max                  | UC Cooperative Extension Wildfire Specialist             | University of California, Santa Barbara                          | United States of America (the) |
| Morley, Craig                | Associate Professor                                      | Toi Ohomai Institute of Technology                               | New Zealand                    |

|                            |                                                   |                                                                                      |                                                            |
|----------------------------|---------------------------------------------------|--------------------------------------------------------------------------------------|------------------------------------------------------------|
| MORMUL, ROGER              | Professor Ecology of Inland Water Ecosystems      | State University of Maringá                                                          | Brazil                                                     |
| Moro, Paulo Rogério        | Professor Adjunto                                 | Universidade Estadual de Ponta Grossa - UEPG                                         | Brazil                                                     |
| Moron, Vincent             | Professor of geography (climatology)              | Aix-Marseille University                                                             | France                                                     |
| Morón Zambrano, Vilisa     | research associate                                | Universidad Simón Bolívar                                                            | Venezuela (Bolivarian Republic of)                         |
| Morończyk, Joanna          | PhD student                                       | University of Silesia in Katowice, Poland                                            | Poland                                                     |
| Moros, Lina                | PhD Candidate                                     | Institute of Environmental Science and Technology, Universitat Autònoma de Barcelona | Spain                                                      |
| Morre, Dr. Susan           | Instructor (Biology and Ecology)                  | Oregon State University and Linn-Benton Community College                            | United States of America (the)                             |
| MORRI, Carla               | Professor of Ecology                              | University of Genoa                                                                  | Italy                                                      |
| Morrien, Elly              | Soil ecology researcher                           | University of Amsterdam                                                              | Netherlands (the)                                          |
| Morris, Jeffrey            | Ph.D. Economist                                   | Sound Resource Management Group                                                      | United States of America (the)                             |
| Morrison, Hilary           | Senior Scientist                                  | Marine Biological Laboratory                                                         | United States of America (the)                             |
| Morrison, Thomas           | Principal Engineer                                | Heritage Standing Inc                                                                | Canada                                                     |
| Morrison III, Archie Todd  | Senior Ocean Engineer                             | Woods Hole Group                                                                     | United States of America (the)                             |
| Morrogh-Bernard, Helen     | Conservation Biologist                            | University of Exeter                                                                 | United Kingdom of Great Britain and Northern Ireland (the) |
| Morrone, Juan              | Full Professor                                    | UNAM                                                                                 | Mexico                                                     |
| Morse, Andy                | Professor of Climate Impacts                      | University of Liverpool                                                              | United Kingdom of Great Britain and Northern Ireland (the) |
| Mortara, Renato            | Professor, Parasitology                           | Unifesp                                                                              | Brazil                                                     |
| Morton, Phoebe             | Postdoctoral research, Water Quality              |                                                                                      | United Kingdom of Great Britain and Northern Ireland (the) |
| Morton, Alexandra          | Independent Biologist - salmon                    |                                                                                      | Canada                                                     |
| Moscatelli, Maria Cristina | Associate Professor - Soil science                | University of Tuscia - Viterbo                                                       | Italy                                                      |
| Moscatello, Marco          | Engineer                                          |                                                                                      | Italy                                                      |
| Moscoso, Alejandra         | Botanist                                          |                                                                                      | Ecuador                                                    |
| Moscoso-Sánchez, David     | Profesor Titular de Universidad                   | Universidad Pablo de Olavide                                                         | Spain                                                      |
| Mosebach, Laura            | PhD Student                                       | Institute of Plant Biology and Biotechnology Münster                                 | Germany                                                    |
| moseby, katherine          | Ecologist, Research Fellow                        | University of New South Wales                                                        | Australia                                                  |
| Mosello, Rosario           | Associated Researcher                             | Water Research Institute, Italian National Research Council                          | Italy                                                      |
| Moser, Gerald              | Senior Scientist in Plant Ecology                 | Plant Ecology, Justus-Liebig-University Giessen                                      | Germany                                                    |
| Moser, Gleyci              | Assistant Professor- Oceanography                 | UERJ                                                                                 | Brazil                                                     |
| Mosner, Eva                | Senior Scientist                                  | Hochschule Geisenheim University, Department of Applied Ecology                      | Germany                                                    |
| Mosquera, Giovanni         | Doctoral researcher                               | Universidad de Cuenca                                                                | Ecuador                                                    |
| Moss, Sarah                | Scientist, Plant Molecular Biology                | Plant and Food Research Ltd                                                          | New Zealand                                                |
| Moss, Alden                | Bioengineering Researcher                         | University of California, Berkeley                                                   | United States of America (the)                             |
| Moss, Alan                 | PhD Candidate - Pollination Ecologist - Himalayas | Saint Louis University                                                               | United States of America (the)                             |
| Mossbrucker, Magdalena     | Research Assistant for a shark ecology project    | Charled Darwin Foundation                                                            | Ecuador                                                    |
| Mossion, Vinciane          | PhD student                                       | University of Neuchâtel                                                              | Switzerland                                                |

|                           |                                                       |                                                                                   |                                                            |
|---------------------------|-------------------------------------------------------|-----------------------------------------------------------------------------------|------------------------------------------------------------|
| Mostaço-Guidolin, Leila   | Postdoctoral Fellow / Biomedical Engineering          | University of British Columbia                                                    | Canada                                                     |
| Mostaço-Guidolin, Luiz C. | Assistant Professor, Computational Epidemiology       | University of Manitoba                                                            | Canada                                                     |
| Mostafavi, Ehsan          | Lecturer/ Research Engineer                           | uOttawa/NRCan                                                                     | Canada                                                     |
| Mota, Luísa               | PhD student, Ecology                                  | University of Campinas                                                            | Brazil                                                     |
| Motiwalla, Zenia          | PhD, Structural Biology                               | CSIR-National Chemical Laboratory                                                 | India                                                      |
| Mott, Rowan               | Research Fellow, Ecology                              | The University of Melbourne                                                       | Australia                                                  |
| Motta Maues, Marcia       | Researcher                                            | Embrapa Eastern Amazon                                                            | Brazil                                                     |
| Motta Maués, Marcia       | Researcher - Pollination biologist                    | Embrapa Eastern Amazon                                                            | Brazil                                                     |
| Mouchet, Florence         | Ecotoxicology research                                | CNRS                                                                              | France                                                     |
| Moullia, Catherine        | Professor- Parasitism-Epidemiology- Ecology-Evolution | Montpellier University                                                            | France                                                     |
| Moullec, Fabien           | Research associate                                    | Hamburg University                                                                | Germany                                                    |
| Moulton, Timothy          | Professor                                             | Department of Ecology, State University of Rio de Janeiro                         | Brazil                                                     |
| Mouquet-Rivier, Claire    | Senior Researcher in Nutrition                        | French Research Institute for sustainable development                             | France                                                     |
| Moura, Alexandra          |                                                       | Institut Pasteur                                                                  | France                                                     |
| Moura, Claudio            | Scientific Researcher, Biologist, Master of Science   | Forest Institute / Secretary of Infrastructure and Environment of São Paulo State | Brazil                                                     |
| Mourey, Lionel            | Research director                                     | CNRS                                                                              | France                                                     |
| Mourier, Tobias           | Research Scientist                                    | KAUST                                                                             | Saudi Arabia                                               |
| Mourier, Johann           | Ecology                                               | IRD                                                                               | France                                                     |
| Mousis, Olivier           | Professor of Astrophysics and Planetary Science       | Aix-Marseille Université                                                          | France                                                     |
| Mousseau, Laure           | Assistant professor                                   | Sorbonne Université                                                               | France                                                     |
| Mousseau, Timothy         | Professor of Biological Sciences                      | University of South Carolina                                                      | United States of America (the)                             |
| MOUTIER, Maryline         | Soil scientist                                        | Ram-Ses (Risk AssessMent - Soil Expert advices and Services)                      | Belgium                                                    |
| Moutin, Thierry           | Professor                                             | Aix Marseille University                                                          | France                                                     |
| Moutinho, Paulo           | Senior Scientist                                      | Amazon Environmental Research Institute - IPAM                                    | Brazil                                                     |
| Moutou, Claire            | Senior Researcher in Astrophysics                     | CNRS                                                                              | France                                                     |
| Mow, June Marie           | Regional Planner and Biologist                        | Fundacion Providence                                                              | Colombia                                                   |
| Mowbray, Sherry           | professor                                             | Department of Cell and Molecular Biology, Uppsala University                      | Sweden                                                     |
| Mowo, Jeremias Gasper     | Senior Advisor / Soil Scientist                       | World Agroforestry (ICRAF)                                                        | Tanzania, United Republic of                               |
| Moya, Wladimir            | Doctoral student                                      | Universidad de Los Lagos                                                          | Ecuador                                                    |
| Moya-Laraño, Jordi        | Tenure scientist                                      | Estación Experimental de Zonas Áridas - CSIC                                      | Spain                                                      |
| Moyano, Marta             | Marine ecologist                                      | University of Hamburg                                                             | Germany                                                    |
| Moyer, Ellen              | Principal                                             | Greenenvironment, LLC                                                             | United States of America (the)                             |
| Moyle, Peter              | Distinguished Professor Rmeritus, Fish Biology        | University of California, Davis                                                   | United States of America (the)                             |
| Moyse, Murdo              | Chemistry                                             | Durham University                                                                 | United Kingdom of Great Britain and Northern Ireland (the) |
| Mrisha, Chediel           | Climate change adaptation officer                     | Tanzania Wildlife Research Institute                                              | Tanzania, United Republic of                               |
| Mrotzek, Almut            | PostDoc                                               | Greifswald Mire Centre, University of Greifswald                                  | Germany                                                    |

|                                  |                                                                  |                                                                          |                                                            |
|----------------------------------|------------------------------------------------------------------|--------------------------------------------------------------------------|------------------------------------------------------------|
| Mrowka, Rob                      | Senior Scientist Emeritus                                        | Center for Biological Diversity                                          | United States of America (the)                             |
| Mrugala, Agata                   | Postdoctoral researcher in Ecology                               | Leibniz-Institute of Freshwater Ecology and Inland Fisheries             | Germany                                                    |
| Msellati, Philippe               | Emeritous research director in epidemiology                      | Institut de Recherche pour le Développement                              | France                                                     |
| Muanis, Manoel                   | Pós Doc, Principal Investigator                                  | UFRJ                                                                     | Brazil                                                     |
| Mubarrok, Saat                   | Lecturer                                                         | Mulawarman University                                                    | Indonesia                                                  |
| MUCHIRI, MUGURE                  | AGRICULTURAL ECONOMICS                                           |                                                                          | Kenya                                                      |
| Mucia, Anthony                   | PhD Researcher, Meteorology/Land Surface Modelling               | CNRM Météo-France, CNRS                                                  | France                                                     |
| Mueller, Melinda                 | Science Faculty (Biology)                                        | Seattle Academy                                                          | United States of America (the)                             |
| Mueller, Ralf C.                 | PhD student                                                      | Max Planck Institute of Animal Behaviour                                 | Germany                                                    |
| Mueller, William                 | Ornithologist - Retired                                          | Western Great Lakes Bird and Bat Observatory, Inc.                       | United States of America (the)                             |
| Mueller-Schwefe, Dr. med. Thomas | Medical Doctor                                                   |                                                                          | Germany                                                    |
| Mugnier, Jean Louis              | Recheatcher earth Sciences                                       | CNRS                                                                     | France                                                     |
| Muhammad Ashraf, Tauseef         | Environmental sciences                                           |                                                                          | Pakistan                                                   |
| Muhlmann, Susana                 | Arquitecta Docente Investigadora                                 | Facultad de Arquitectura Diseño y Urbanismo, Universidad de Buenos Aires | Argentina                                                  |
| Muir, Tom                        | Geoscientist (retired)                                           | (Ontario Geological Survey)                                              | Canada                                                     |
| Muir, Barry                      | Adjunct Associate Professor of Ecology                           | Retired                                                                  | Australia                                                  |
| Muir, Rebecca                    | PhD Student in Psychiatry                                        | University College London                                                | United Kingdom of Great Britain and Northern Ireland (the) |
| Mukhopadhyay, Sudarshana         | PhD candidate, hydroclimatology                                  | North Carolina State University                                          | United States of America (the)                             |
| Muktupavela, Rasa                | PhD in Population Genetics                                       | University of Copenhagen                                                 | Denmark                                                    |
| Mukul, Sharif Ahmed              | Research Fellow                                                  | University of the Sunshine Coast                                         | Australia                                                  |
| Mulatier, Margaux                | Postdoc in chemical ecology of insects                           | Institut Pasteur de la Guadeloupe                                        | France                                                     |
| Mulder, Christa                  | Professor of Ecology                                             | University of Alaska Fairbanks                                           | United States of America (the)                             |
| Mulero, Stephen                  | PhD student                                                      | University of Perpignan                                                  | France                                                     |
| Mulhouse, John                   | Botanist                                                         |                                                                          | United States of America (the)                             |
| Mulkey, Stephen                  | Lecturer University of Florida, President emeritus Unity College | University of Florida                                                    | United States of America (the)                             |
| Mulla, Aziz                      | PhD Coral Reef Ecology                                           | Academia Sinica                                                          | Taiwan                                                     |
| Muller, Rebecca                  | Junior researcher Savanna Ecology                                | University of Cape Town                                                  | South Africa                                               |
| Muller, Richard                  | Computer Science                                                 |                                                                          | New Zealand                                                |
| Müller, Antoine                  | CEO, Dr. In Physics                                              | Alpes Lasers SA                                                          | Switzerland                                                |
| Müller, Georg                    | Master's student                                                 | Universidade Federal do Rio de Janeiro                                   | Brazil                                                     |
| Müller, Matthias                 | Staff Scientist                                                  |                                                                          | Germany                                                    |
| Müller, Gerd B.                  | Professor Emeritus, Biology                                      | University of Vienna                                                     | Austria                                                    |
| Müller, Andreas                  | CEO / Chemistry                                                  | chromgruen Planungs- und Beratungs- GmbH & Co. KG                        | Germany                                                    |
| Müller, Birgit                   | Senior Scientist                                                 | Helmholtz Centre for Environmental Research - UFZ                        | Germany                                                    |
| Müller-Klein, Nadine             | Post Doc in Evolutionary Ecology                                 | Ulm University                                                           | Germany                                                    |
| Mulligan, Vikram                 | Research Scientist (Biochemistry)                                | Center for Computational Biology, Flatiron Institute                     | United States of America (the)                             |

|                             |                                                                                             |                                                                                                                                    |                                                            |
|-----------------------------|---------------------------------------------------------------------------------------------|------------------------------------------------------------------------------------------------------------------------------------|------------------------------------------------------------|
| Mullins, Paul               | Reader, Psychology                                                                          | Bangor University                                                                                                                  | United Kingdom of Great Britain and Northern Ireland (the) |
| Multon, Bernard             | Electrical Engineering                                                                      | ENS Rennes                                                                                                                         | France                                                     |
| Mulungula Pascal, Masilya   | Teacher and Researcher                                                                      | Hydrobiological Researcher Centre (CRH) and Unité d'enseignement et de Recherche en Hydrobiologie Appliquée (UERHA)                | Congo (the Democratic Republic of the)                     |
| MULUNGULA PASCAL, MASILYA   | Professor/Researcher                                                                        | Hydrobiological Research Centre (CRH)-Uvira and Unité d'Enseignement et de Recherche en Hydrobiologie Appliquée (UERHA)/ISP-Bukavu | Congo (the Democratic Republic of the)                     |
| Muncke, Jane                | Managing Director                                                                           | Food Packaging Forum Foundation                                                                                                    | Switzerland                                                |
| Mundalamo, Fhatuwani James  | Physics and Physics Education                                                               | Tshitavha Sambandou Village                                                                                                        | South Africa                                               |
| Mundhenk, Niklas            | Senior Research Associate                                                                   | Lawrence Berkeley National Lab                                                                                                     | United States of America (the)                             |
| Mundkur, Taej               | Senior Technical Officer                                                                    | Wetlands International                                                                                                             | Netherlands (the)                                          |
| Munguira, Miguel L.         | Professor Zoology                                                                           | Universidad Autónoma de Madrid                                                                                                     | Spain                                                      |
| Muniz Tagliari, Mario       | PhD student                                                                                 | Federal University of Santa Catarina                                                                                               | Brazil                                                     |
| Münkemüller, Tamara         | scientist                                                                                   | CNRS                                                                                                                               | France                                                     |
| Munoz, Joaquin              | Postdoctoral Researcher                                                                     | UIRCP, University of Córdoba                                                                                                       | Spain                                                      |
| Munoz, Isabel               | Professor                                                                                   | University of Barcelona                                                                                                            | Spain                                                      |
| Munoz, Carlos               | Researcher, Marine Sciences                                                                 | Fundacion Ecomares                                                                                                                 | Colombia                                                   |
| Munoz, François             | Professor in Ecology and Biogeography                                                       | Université Grenoble-Alpes                                                                                                          | France                                                     |
| Muñoz, Gabriel              | Phd student community ecology and evolution                                                 | Concordia University Montreal                                                                                                      | Canada                                                     |
| Muñoz, Pao                  | Grad Student Environmental Studies                                                          | Ohio University's Voinovich School of Leadership and Public Affairs                                                                | Costa Rica                                                 |
| Muñoz Muñoz, María          | PhD. in Marine Spatial Planning / Member of the Mediterranean Climate Change Research Group | Spanish Oceanographic Institute                                                                                                    | Spain                                                      |
| Muñoz-Abril, Laia           | Biologist                                                                                   | Universidad San Francisco de Quito                                                                                                 | Ecuador                                                    |
| Muñoz-Nolasco, Francisco J. | Biologist - MSc student in Ecology                                                          | Universidad Nacional Autónoma de México                                                                                            | Mexico                                                     |
| Muñoz-Sáez, Andrés          | Agroecology and Sustainability                                                              | Center of Applied Ecology and Sustainability (CAPES). Universidad Católica de Chile                                                | Chile                                                      |
| Munoz-Torres, Zeidy         | Neuroscientist                                                                              | UNAM                                                                                                                               | Mexico                                                     |
| Munson, Alison              | Professor of Forest ecology, PhD                                                            | Université Laval                                                                                                                   | Canada                                                     |
| Münster, Marie              | Professor                                                                                   | Technical University of Denmark                                                                                                    | Denmark                                                    |
| Munzinger, Jérôme           | Researcher, tropical botany                                                                 | IRD                                                                                                                                | France                                                     |
| Münzner, Karla              | PhD-student, Limnology                                                                      | Uppsala University                                                                                                                 | Sweden                                                     |
| Muradian, Melissa L         | Water Quality Data Analysis                                                                 |                                                                                                                                    | United States of America (the)                             |
| Murall, Carmen Lia          | Infectious disease ecologist                                                                | University of Montreal                                                                                                             | Canada                                                     |
| Murcia, Juan                | Marine biologist                                                                            |                                                                                                                                    | Puerto Rico                                                |
| Murcott, Susan              | Lecturer                                                                                    | MIT D-Lab                                                                                                                          | United States of America (the)                             |
| Murillo Corrales, Tatiana   | PhD researcher                                                                              | German Primate Center                                                                                                              | Germany                                                    |
| Murphy, Rosanna             | geology                                                                                     | University of New England                                                                                                          | Australia                                                  |
| Murphy, Thomas              | Laboratory Manager                                                                          | Oregon State University                                                                                                            | United States of America (the)                             |
| Murphy, Kieran              | Marine Ecology PhD Student                                                                  | Institute for Marine and Antarctic Studies                                                                                         | Australia                                                  |

|                          |                                                           |                                                                                   |                                                            |
|--------------------------|-----------------------------------------------------------|-----------------------------------------------------------------------------------|------------------------------------------------------------|
| Murphy, Dennis           | Conservation Biologist                                    | University of Nevada, Reno                                                        | United States of America (the)                             |
| Murphy, Michael          | Professor of Astrophysics                                 | Swinburne University of Technology                                                | Australia                                                  |
| Murray, Jon              | Senior Research Associate                                 | Lancaster University                                                              | United Kingdom of Great Britain and Northern Ireland (the) |
| Murray, Tomas            | Ecologist                                                 | National Biodiversity Data Centre                                                 | Ireland                                                    |
| Murray, K. Greg          | Professor of Biology (Ecology)                            | Hope College                                                                      | United States of America (the)                             |
| Murray, Kent             | Professor of Geological Sciences                          | University of Michigan                                                            | United States of America (the)                             |
| MURRAY, Hugues           | Professor (Emeritus)                                      | Normandy University                                                               | France                                                     |
| Murray-Rust, Peter       | Reader Emeritus                                           | University of Cambridge                                                           | United Kingdom of Great Britain and Northern Ireland (the) |
| Murrell, Zack            | Professor                                                 | Appalachian State University                                                      | United States of America (the)                             |
| Murrell, Paul            | Associate Professor                                       | The University of Auckland                                                        | New Zealand                                                |
| Murrell, Michael         | Research Ecologist                                        | US Environmental Protection Agency (retired)                                      | United States of America (the)                             |
| Murry, Dr Nick           | Lecturer, Environmental Management                        | Bath Spa University                                                               | United Kingdom of Great Britain and Northern Ireland (the) |
| Mushinsky, Henry         | Professor Emeritus                                        | University of South Florida                                                       | United States of America (the)                             |
| Musielak, Dora           | Research Position                                         | University of Texas                                                               | United States of America (the)                             |
| Musil, Charles           | Senior Specialist Scientist (Retired)                     | South African National Biodiversity Institute                                     | South Africa                                               |
| Musiolek, Lea            | PhD student in cognitive neuroscience                     | Humboldt Universität Berlin                                                       | Germany                                                    |
| Muszewska, Anna          | Assistant Professor/ Biology                              | Institute of Biochemistry and Biophysics, Polish Academy of Sciences              | Poland                                                     |
| Muth, Allan              | Director Emeritus Boyd Deep Canyon Desert Research Center | University of California, Riverside                                               | United States of America (the)                             |
| Mutzel, Ariane           | Postdoctoral Scholar                                      | University of Kentucky                                                            | United States of America (the)                             |
| Muylaert, Renata de Lara | PhD student                                               | UNESP São Paulo State University                                                  | Brazil                                                     |
| Muys, Bart               | Full Professor of Forest Ecology & Management             | KU Leuven                                                                         | Belgium                                                    |
| Muzaffar, Sabir          | Professor of Ecology                                      | United Arab Emirates University                                                   | United Arab Emirates (the)                                 |
| Mwamhanga, John          | Faculty                                                   | School for Field Studies                                                          | Tanzania, United Republic of                               |
| Mwampamba, Tuyeni H      | Research Professor                                        | National Autonomous University of Mexico                                          | Mexico                                                     |
| Myatt, Gerald            | Reader in Physics (Retired)                               | Oxford University                                                                 | United Kingdom of Great Britain and Northern Ireland (the) |
| Mycroft, Abby            | PhD candidate Environmental Science                       | University of York                                                                | United Kingdom of Great Britain and Northern Ireland (the) |
| Myers, Shona             | Principal Ecologist                                       | Myers Ecology Ltd                                                                 | New Zealand                                                |
| Myers, Krista            | Geology and Geophysics                                    | Louisiana State University                                                        | United States of America (the)                             |
| Myers, Philip            | Professor Emeritus                                        | University of Michigan                                                            | United States of America (the)                             |
| Myhren, Jonn Are         | Associate professor head of building technology           | Dalarna university                                                                | Sweden                                                     |
| Mynott, Sara             |                                                           | University of Exeter                                                              | United Kingdom of Great Britain and Northern Ireland (the) |
| Mysłajek, Robert W.      | Assistant Professor                                       | University of Warsaw, Faculty of Biology, Institute of Genetics and Biotechnology | Poland                                                     |
| Myssior, Sergio          | Architecture and Urban Planning                           | MYR                                                                               | Brazil                                                     |

|                               |                                                               |                                                                                     |                                                            |
|-------------------------------|---------------------------------------------------------------|-------------------------------------------------------------------------------------|------------------------------------------------------------|
| Mzumara-Gawa, Tiwonge         | Lecturer in Ecology                                           | Malawi University of Science and Technology                                         | Malawi                                                     |
| N., Sivasothi                 | Senior Lecturer, Biological Sciences                          | Department of Biological Sciences, National University of Singapore                 | Singapore                                                  |
| Nachón García, David José     | Post doc researcher within the project DiadES - Ichthyologist | Universidade de Compostela (USC) - Estación de Hidrobiología "Encoro do Con" (EHEC) | Spain                                                      |
| Nachtigall Maurício, Giovanni | University Professor / zoology and environmental education    | Universidade Federal de Pelotas (Federal University of Pelotas)                     | Brazil                                                     |
| Naciri, Yamama                | Head curator                                                  | Conservatoire & Jardin botaniques de Genève                                         | Switzerland                                                |
| Nackley, Selina               | Biologist                                                     | McGill University                                                                   | Canada                                                     |
| Nadeem, Soha                  | Engineer                                                      | University of Connecticut                                                           | United States of America (the)                             |
| Nadelhoffer, Knute            | Professor, Dept. of Ecology & Evolutionary Biology            | University of Michigan                                                              | United States of America (the)                             |
| Nado, Ladislav                | Behavioral Ecologist                                          | Institute of Forest Ecology, Slovak Academy of Sciences                             | Slovakia                                                   |
| nagalakshmi, r                | associate professor                                           | SRM IST KTR                                                                         | India                                                      |
| Nagamachi, Cleusa Yoshiko     | Full Professor - Genetics                                     | Universidade Federal do Pará                                                        | Brazil                                                     |
| Nagel, Thomas A.              | Forest ecologist                                              | University of Ljubljana                                                             | Slovenia                                                   |
| Nagels, Luc                   | emeritus professor Chemistry                                  | Antwerp University                                                                  | Belgium                                                    |
| Naggay, Benjamin              | PhD Student                                                   | Reutlingen University                                                               | Germany                                                    |
| Naggs, Fred                   | Scientific Associate, Biodiversity & Conservation             | The Natural History Museum, London                                                  | United Kingdom of Great Britain and Northern Ireland (the) |
| Naglik, Carole                | Environmental Geologist / Dr. Sc. Nat. Palaeontology          |                                                                                     | Switzerland                                                |
| Nagy, Laszlo                  | Scientific Advisor                                            | Hungarian Academy of Sciences                                                       | Hungary                                                    |
| Nagy, Zoltán Tamás            | biologist                                                     |                                                                                     | Germany                                                    |
| Nagy, Martina                 | PostDoc Biology                                               | Museum für Naturkunde, Berlin                                                       | Germany                                                    |
| Nahon, Peter                  | Researcher                                                    | University of Neuchâtel                                                             | Switzerland                                                |
| Naia, Marisa                  | MSc student                                                   | Faculty of Sciences, Porto                                                          | Portugal                                                   |
| Naik, Hiral                   | Scientist/Conservationist                                     |                                                                                     | South Africa                                               |
| Naik, Hemal                   | PhD Student                                                   | Max Planck Institute of Animal Behavior                                             | Germany                                                    |
| Nair, Remya                   | Post-Doctoral fellow                                          | Montana State University                                                            | United States of America (the)                             |
| Nair, Tarun                   | Researcher, Conservation Biology                              |                                                                                     | India                                                      |
| Nakayama, Cristina Rossi      | Assistant professor / Environmental Science                   | Federal university of Sao Paulo                                                     | Brazil                                                     |
| Nakoneczny, Mirosław          | Assoc. Prof.                                                  | University of Silesia; Dept. of Animal Physiology and Ecotoxicology                 | Poland                                                     |
| Nanni, Analia                 | Posdoctoral fellow CONICET and chief of practical work        | Instituto de Investigación e Ingeniería Ambiental IIIA(CONICET-UNSAM)               | Argentina                                                  |
| Nanni, Ana Sofia              | Postdoctoral Researcher                                       | Instituto de Ecología Regional (UNT/CONICET)                                        | Argentina                                                  |
| Nanninga, Gerrit              | Postdoctoral Fellow                                           | University of Cambridge                                                             | United Kingdom of Great Britain and Northern Ireland (the) |
| Nannini, Francesco            | PhD student in cancer immunotherapy                           | UCL Cancer Institute                                                                | United Kingdom of Great Britain and Northern Ireland (the) |
| Napolitano, Laura             | Economist                                                     | London School of Economics                                                          | Italy                                                      |
| Napoly, Adrien                | Research Engineer                                             | Météo-France / CNRM                                                                 | France                                                     |

|                                |                                                                    |                                                                       |                                |
|--------------------------------|--------------------------------------------------------------------|-----------------------------------------------------------------------|--------------------------------|
| Napton, Darrell                | Professor of Geography                                             | South Dakota State University                                         | United States of America (the) |
| Narayanappa, DEVARAJU          | Research Scientist                                                 | IPSL/LSCE (Laboratoire des Sciences du Climat et de l'Environnement)  | France                         |
| Narducci, Rachel               | Vertebrate Paleontology                                            | Florida Museum of Natural History                                     | United States of America (the) |
| Narvaez, Diego                 | Assistant Professor                                                | Universidad de Concepción                                             | Chile                          |
| Nascimento, Marcelo            | Associate Professor /Plant Ecology                                 | Universidade Estadual do Norte Fluminense Darcy Ribeiro (UENF)        | Brazil                         |
| Nascimento, Victor             | Professor                                                          | UFRGS                                                                 | Brazil                         |
| Nascimento Lemos, Leandro      | PhD candidate                                                      | University of São Paulo (USP)                                         | Brazil                         |
| Naselli-Flores, Luigi          | Associate Professor of Environmental and Applied Botany            | University of Palermo                                                 | Italy                          |
| Nasi, Robert                   |                                                                    | CIFOR                                                                 | Indonesia                      |
| Nasmith, William               | Professor of Climatology                                           | University of Windsor                                                 | Canada                         |
| NASR, Alexis                   | university professor                                               | Aix Marseille University - France                                     | France                         |
| Nass Kovacs, Gabriela          | Postdoc                                                            | Max Planck Institute for medical Research, Heidelberg                 | Germany                        |
| Natarajan, Lakshminarayanan    | Project scientist                                                  | Wildlife Institute of India                                           | India                          |
| Nathan, Lisa                   | Associate Professor                                                | University of British Columbia                                        | Canada                         |
| Nathan MD, Martha              | Family Physician                                                   | Baystate Brightwood Community Health Center                           | United States of America (the) |
| Nätscher, Paulina              | PhD student in Palaeobiology                                       | Friedrich-Alexander University Erlangen-Nürnberg                      | Germany                        |
| Nattabi, Juliet                | Teacher                                                            | Makerere University                                                   | Uganda                         |
| Nau, Darius                    | Paleontology                                                       | University of Bonn                                                    | Germany                        |
| Nau, Patrick                   | Combustion Scientist                                               | German Aerospace Center (DLR)                                         | Germany                        |
| Naud, Marie-Eve                | Scientific and EPO coordinator, astronomy                          | Université de Montréal                                                | Canada                         |
| Nauen, Cornelia E.             | Marine Scientist, President                                        | Mundus maris - Sciences and Arts for Sustainability asbl              | Belgium                        |
| Navarro, Francisco             | Professor of Applied Mathematics                                   | Universidad Politécnica de Madrid                                     | Spain                          |
| Navarro, Rene                  | PhD (Zoology)                                                      | FitzPatrick Institute of African Ornithology, University of Cape Town | South Africa                   |
| Navarro, Miguel                | Genomic Sciences student                                           | Universidad Nacional Autónoma de México                               | Mexico                         |
| Navarro, Joan                  | Researcher                                                         | Instituto de Ciencias del Mar CSIC                                    | Spain                          |
| Navarro, Nuria                 | Professor                                                          | Universidad Rey Juan Carlos                                           | Spain                          |
| Navarro, Luis                  | Professor of Biology                                               | University of Vigo                                                    | Spain                          |
| Navarro Correa, Micaela Andrea | Plant Science PhD student                                          | National Centre for Biotechnology (CNB-CSIC)                          | Spain                          |
| Navarro Llorens, Juana Maria   | Associate professor                                                | Universidad Complutense de madrid                                     | Spain                          |
| Navarro Reyes, Francisco Bruno | Permanent researcher                                               | IFAPA (Andalusian Government)                                         | Spain                          |
| Navarro-León, Eloy             | PhD Student in Biology                                             | University of Granada                                                 | Spain                          |
| Navas, Marie-Laure             | Ecology                                                            | Montpellier SupAgro                                                   | France                         |
| Navascués, Miguel              | Researcher                                                         | INRA                                                                  | France                         |
| Naya, Hugo                     | Head of Bioinformatics / Associate Professor Quantitative Genetics | Institut Pasteur de Montevideo / Facultad de Agronomía - UDELAR       | Uruguay                        |
| Nayak, Ayushi                  | Archaeological Scientist                                           | Max Planck Institute for the Science of Human History                 | Germany                        |
| Nayak, Aditya                  | Molecular plant sciences.                                          | ETH Zürich                                                            | India                          |

|                                      |                                                                |                                                                                                                         |                                                            |
|--------------------------------------|----------------------------------------------------------------|-------------------------------------------------------------------------------------------------------------------------|------------------------------------------------------------|
| Neal, Jodi                           | Horticultural science                                          | Department of Agriculture and Fisheries                                                                                 | Australia                                                  |
| Nečada, Marek                        | Nano-optics                                                    | Aalto University                                                                                                        | Finland                                                    |
| Necsulea, Anamaria                   | Researcher                                                     | CNRS                                                                                                                    | France                                                     |
| Nedelec, Sophie                      | Postdoctoral researcher, Marine biosciences                    | University of Exeter                                                                                                    | United Kingdom of Great Britain and Northern Ireland (the) |
| Neelamraju, Cath                     | Water Quality Scientist                                        | State government Department of Environment and Science                                                                  | Australia                                                  |
| Neff, Roni                           | Associate Professor, Environmental Health                      | Johns Hopkins Bloomberg School of Public Health                                                                         | United States of America (the)                             |
| Negro Balmaseda, Juan José           | Researcher                                                     | CSIC                                                                                                                    | Spain                                                      |
| Neichel, Benoit                      | Scientist                                                      | Laboratoire Astrophysique de Marseille                                                                                  | France                                                     |
| Neidhardt, Harald                    | Biogeochemistry                                                | Tübingen University                                                                                                     | Germany                                                    |
| Neier, Thomas                        |                                                                | WU Wien                                                                                                                 | Austria                                                    |
| Neill, Richard                       | College Lecturer in Physics                                    | Magdalene College, Cambridge                                                                                            | United Kingdom of Great Britain and Northern Ireland (the) |
| Neilson, Roy                         | Soil Ecologist                                                 | The James Hutton Institute                                                                                              | United Kingdom of Great Britain and Northern Ireland (the) |
| Neinaka, Valentina                   | Environmental Scientist                                        | Private                                                                                                                 | Papua New Guinea                                           |
| Neldner, Karri                       | PhD student                                                    | University of Queensland                                                                                                | Australia                                                  |
| nelson, matthew                      | lecturer, biology                                              | university of british columbia                                                                                          | Canada                                                     |
| Nelson, Kirk                         | Former postdoctoral scholar, Civil & Environmental Engineering | UC Davis                                                                                                                | United States of America (the)                             |
| Nelson, Michael Paul                 | Professor                                                      | Oregon State University                                                                                                 | United States of America (the)                             |
| Nelson, Charlotte                    | PhD candidate                                                  | University of British Columbia                                                                                          | Canada                                                     |
| Nelson, Cara                         | Professor of Restoration Ecology                               | University of Montana                                                                                                   | United States of America (the)                             |
| Nelson Teixeira Borges Júnior, Vitor | Researcher / Ecology                                           | Universidade Federal do Rio de Janeiro                                                                                  | Brazil                                                     |
| NEMERY, Julien                       | Associate professor                                            | Université Grenoble Alpes/Grenoble-INP                                                                                  | France                                                     |
| Nepote, Ana C.                       | PhD Candidate in Sustainability Sciences                       | Universidad Nacional Autonoma de Mexico                                                                                 | Mexico                                                     |
| Neser, Stefan                        | Professor, Entomology                                          | Forestry and Agricultural Biotechnology Institute, Univ. of Pretoria                                                    | South Africa                                               |
| Neser, Otilie                        | Entomologist (Retired)                                         | Agricultural Research Institute, Biosystematics Division (retired)                                                      | South Africa                                               |
| Ness, Bryan                          | Professor of Biology                                           | Pacific Union College                                                                                                   | United States of America (the)                             |
| NESTAL GÓMEZ, Enrique                | Chemical Engineer                                              | none                                                                                                                    | Spain                                                      |
| Nettelblad, Carl                     | Associate Professor                                            | Division of Scientific Computing, Science for Life Laboratory, Department of Information Technology, Uppsala University | Sweden                                                     |
| Netto-Ferreira, Andre                | Professor                                                      | Universidade Federal do Rio Grande do Sul                                                                               | Brazil                                                     |
| Neubauer, Grzegorz                   | researcher, biology                                            | University of Wroclaw                                                                                                   | Poland                                                     |
| Neufeld, Howard                      | Professor of Plant Ecophysiology                               | Appalachian State University                                                                                            | United States of America (the)                             |
| Neuman-Lee, Lorin                    | Biological Sciences                                            | Arkansas State University                                                                                               | United States of America (the)                             |
| Neumann, Peter                       | Professor                                                      | Institute of Bee Health, Vetsuisse Faculty, University of Bern                                                          | Switzerland                                                |

|                     |                                                             |                                                                                                   |                                                            |
|---------------------|-------------------------------------------------------------|---------------------------------------------------------------------------------------------------|------------------------------------------------------------|
| Neumann, Rebecca    | Associate Professor in Civil & Environmental Engineering    | University of Washington                                                                          | United States of America (the)                             |
| Neumann, Daniel     | Scientist, Earth System and Environmental Modeling          | German Climate Computing Center                                                                   | Germany                                                    |
| Neumüller, Ulrich   | PhD candidate/scientific Assistant                          | University of Ulm                                                                                 | Germany                                                    |
| Neveu, Jérémy       | Associate professor in astrophysics                         | Université Paris-Sud / LAL                                                                        | France                                                     |
| Nevo, Eviatar       | Professor of Evolutionary Biology                           | Director, International Graduate Center of Evolution, Institute of Evolution, University of Haifa | Israel                                                     |
| Nevoux, Marie       | Researcher in Ecology                                       | INRA                                                                                              | France                                                     |
| Newell, Peter       | Assistant Professor Biological Sciences                     | State University of New York at Oswego                                                            | United States of America (the)                             |
| Newell, David       | Senior Lecturer Environmental Science                       | Southern Cross University                                                                         | Australia                                                  |
| Newman, Hector      | PhD Student in Antibiotic Resistance                        | University of Warwick                                                                             | United Kingdom of Great Britain and Northern Ireland (the) |
| Newman, Jacalyn     | Ph.D. Biochemistry, Microbiology, and Molecular Biology     |                                                                                                   | United States of America (the)                             |
| Newman, Sarah       | MSc Entomology                                              | University of Pretoria                                                                            | South Africa                                               |
| Newman, Raymond     | Professor of Fisheries                                      | University of Minnesota                                                                           | United States of America (the)                             |
| Newman, Erica       | Research scientist, Ecology and Evolutionary Biology        | University of Arizona                                                                             | United States of America (the)                             |
| Newport, Mary Ellen | Secondary School Biology Teacher                            | Interlochen Center for the Arts                                                                   | United States of America (the)                             |
| Newton, John        | Research Entomologist (retired)                             | Rentokil PLC UK R&D Laboratory                                                                    | United Kingdom of Great Britain and Northern Ireland (the) |
| Newton, Rosemary    | Plant Scientist                                             | Royal Botanic Gardens, Kew                                                                        | United Kingdom of Great Britain and Northern Ireland (the) |
| Ng, Melissa         | Research Fellow, Immunology                                 | Singapore Immunology Network                                                                      | Singapore                                                  |
| Ng, Katherina       | Ecology                                                     | The Australian National University                                                                | Australia                                                  |
| Nguyen, Hong Hai    | Lecturer                                                    | Vietnam National University of Forestry                                                           | Viet Nam                                                   |
| Nguyen, Brittney    | PhD Candidate, Microbiology                                 | UC Berkeley                                                                                       | United States of America (the)                             |
| Nguyen, Karena      | PhD Candidate                                               | University of South Florida                                                                       | United States of America (the)                             |
| Nguyen, Trang       | PhD of Plant Biotechnology                                  | University of Canterbury, Christchurch                                                            | New Zealand                                                |
| Nguyen, Vinh        |                                                             | CzechGlobe                                                                                        | Czech Republic (the)                                       |
| Nguyen, Nhu         | Assistant Researcher                                        | University of Hawaii at Manoa                                                                     | United States of America (the)                             |
| NGUYEN-HUU, Adrien  | Assistant Professor in Economics                            | University of Montpellier                                                                         | France                                                     |
| Nicholl, Carolyn    | Retired Science Teacher, Inspector and Adviser              | Warwickshire County Council                                                                       | United Kingdom of Great Britain and Northern Ireland (the) |
| Nichols, Hazel      | Lecturer in Biosciences                                     | Swansea University                                                                                | United Kingdom of Great Britain and Northern Ireland (the) |
| Nicholson, Georgina | Marine Science                                              | University of Auckland                                                                            | New Zealand                                                |
| Nicholson, Lindsey  | Researcher                                                  | University of Innsbruck                                                                           | Austria                                                    |
| Nickels, Lyndsey    | Professor of Cognitive Science                              | Macquarie University                                                                              | Australia                                                  |
| Nicolai, Annegret   | Researcher in Conservation Biology and Ecological Economics | University Rennes 1, Station Biologique de Paimpont, UMR 6553 EcoBio                              | France                                                     |
| Nicolas, Stéphane   | Researcher / Plant Geneticist                               | INRA                                                                                              | France                                                     |
| Nicolas, Delphine   | Researcher                                                  | Tour du Valat                                                                                     | France                                                     |

|                          |                                                   |                                                                                        |                                                            |
|--------------------------|---------------------------------------------------|----------------------------------------------------------------------------------------|------------------------------------------------------------|
| Nicolas, Violaine        | Assistant Professor                               | Museum National d'Histoire Naturelle                                                   | France                                                     |
| Nicolas, Dubos           | Researcher in macroecology                        | MNHN                                                                                   | France                                                     |
| Nicolle, Pierre          | Engineer in Hydrology                             | Irstea                                                                                 | France                                                     |
| Nieberding, Caroline     | Professor in Ecology and Biology                  | University of Louvain (UCLouvain)                                                      | Belgium                                                    |
| Nielsen, Luisa           | Research Assistant                                | Globe Institute                                                                        | Denmark                                                    |
| Nielsen, Birte L         | Senior Scientist                                  | INRA                                                                                   | France                                                     |
| Nielsen, Sven N.         | Professor, Geology and Paleontology               | Universidad Austral de Chile                                                           | Chile                                                      |
| Nielsen, Uffe            | Senior Lecturer, Ecology                          | Western Sydney University                                                              | Australia                                                  |
| Nielsen, Daniel          | Research Scientist, Microbiology                  |                                                                                        | Australia                                                  |
| Niemeyer, Julia          | PhD student in Ecology                            | Federal University of Rio de Janeiro                                                   | Brazil                                                     |
| Niemi, Gerald            | Professor Emeritus                                | University of Minnesota-Duluth                                                         | United States of America (the)                             |
| Nieminen, Eini           | PhD Student, Ecology and Conservation Science     | University of Jyväskylä, Department of Biological and Environmental Science            | Finland                                                    |
| Nieters, Anne            | Scientific researcher climate economics           | Institute of economic structure research (GWS mbH)                                     | Germany                                                    |
| Nieto Feliner, Gonzalo   | Researcher, plant evolutionary biology            | Royal Botanic Garden, CSIC, Madrid                                                     | Spain                                                      |
| Nieto-Lugilde, Diego     | Assistant Professor of Botany (Biology)           | Universidad de Córdoba                                                                 | Spain                                                      |
| Nieto-Román, Alejandra   | Postdoctoral researcher                           | Consejo Superior de Investigaciones Científicas                                        | Spain                                                      |
| NIEVA, F. JAVIER J.      | COLLEGE PROFESSOR / ECOLOGY                       | UNIVERSIDAD DE HUELVA                                                                  | Spain                                                      |
| Nievaes, Marie Frances   | Associate Professor                               | University of the Philippines Visayas                                                  | Philippines (the)                                          |
| Nieves-Aldrey, Jose Luis | Scientific researcher                             | Museo Nacional de Ciencias Naturales (CSIC)                                            | Spain                                                      |
| Niewint Gori, Jessica    | STEAM Education                                   | Indire                                                                                 | Italy                                                      |
| Niezrecki, Christopher   | Professor and Chair                               | University of Massachusetts Lowell                                                     | United States of America (the)                             |
| Niggemann, Jutta         | Research Scientist Geosciences                    | Institute for Chemistry and Biology of the Marine Environment, University of Oldenburg | Germany                                                    |
| Nigrelli, Guido          | Researcher                                        | NJational Research Council of Italy                                                    | Italy                                                      |
| Niinemets, Ülo           | Professor, Head of Department                     | Estonian University of Life Sciences                                                   | Estonia                                                    |
| Nijman, Vincent          | Professor in Anthropology                         | Oxford Brookes University                                                              | United Kingdom of Great Britain and Northern Ireland (the) |
| Nijsse, Femke            | PhD candidate in climate dynamics                 | University of Exeter                                                                   | United Kingdom of Great Britain and Northern Ireland (the) |
| Nikinmaa, Mikko          | Professor Emeritus of Zoology                     | University of Turku                                                                    | Finland                                                    |
| Nikleka, Enkeleda        | Academic staff                                    | Agriculture University of Tirana                                                       | Albania                                                    |
| Nikola, Jajcay           | Postdoctoral fellow                               | Technische Universität Berlin                                                          | Germany                                                    |
| Nikolaus, Robert         | Scientific Staff                                  | Leibniz Institute of Freshwater Ecology and Inland Fisheries                           | Germany                                                    |
| Nikolausz, Marcell       | Senior scientist / Microbiology                   | UFZ                                                                                    | Germany                                                    |
| Nikolic, Natacha         | Doctor in Sciences                                | IRD                                                                                    | Réunion                                                    |
| Nikstat, Amelie          | Psychologist                                      | Bielefeld University                                                                   | Germany                                                    |
| NIR, YAACOV              | Marine Geologist                                  | RETIRED Geological Survey of Israel                                                    | Israel                                                     |
| Nisa, Shahista           | Postdoctoral Fellow                               | Massey University                                                                      | New Zealand                                                |
| Nishio, John             | CEO (Molecular and physiological plant biologist) | Sol Dance Technologies LLC; JNT Technologies LLC                                       | United States of America (the)                             |
| Nissani, Moti            | Professor emeritus, Dept. Biology / Geneticist    | Wayne State University                                                                 | Argentina                                                  |

|                           |                                                                        |                                                                 |                                                            |
|---------------------------|------------------------------------------------------------------------|-----------------------------------------------------------------|------------------------------------------------------------|
| Nitsch, Aida              | Behavioural Ecology                                                    |                                                                 | France                                                     |
| Nizzetto, Luca            | Senior research scientist/environmental sciences                       | Norwegian Institute for Water Research                          | Norway                                                     |
| Njabo, Kevin              | Africa Director, Assistant Professfor                                  | UCLA Congo Basin Institute                                      | Cameroon                                                   |
| Nkaizirwa, Josephat Paul  |                                                                        | University of Dodoma                                            | Tanzania, United Republic of                               |
| Nmor, Stanley             | MSc Student                                                            | Ghent University                                                | Belgium                                                    |
| Nnaji, Omenmayor          | Marine biologist                                                       | University of Lagos                                             | Nigeria                                                    |
| Noacco, Valentina         | Senior Research Associate                                              | University of Bristol                                           | United Kingdom of Great Britain and Northern Ireland (the) |
| Nobi, Kenneth             | REDD+                                                                  | Climate Change & Development Authority (CCDA)                   | Papua New Guinea                                           |
| Noble, Michael            | Invasive species management                                            |                                                                 | Australia                                                  |
| Noble, Robert             | Postdoctoral researcher, Evolutionary biology                          | ETH Zurich                                                      | Switzerland                                                |
| Nobre, Carlos             | Senior Researcher                                                      | Institute of Advanced Studies, University of São Paulo          | Brazil                                                     |
| Nogueira, Miodeli         | PERMANENT PROFESSOR                                                    | UFPB                                                            | Brazil                                                     |
| Nogueira dos Reis, Sandra | Astrophysics PhD student                                               | Instituto de Astrofísica e Ciências do Espaço                   | Portugal                                                   |
| Noguera-Urbano, Elkin A.  | Biogeography researcher                                                | Instituto Humboldt                                              | Colombia                                                   |
| Nogues, Xavier            | University Lecturer                                                    | University of Bordeaux                                          | France                                                     |
| Nokelainen, Ossi          | PhD, Ecology and Evolutionary Biology                                  | University of Jyväskylä                                         | Finland                                                    |
| Nolan, James              | Associate Professor of Biology                                         | Georgia Gwinnett College                                        | United States of America (the)                             |
| Nolwenn, Renaud           | Assistant ingénieur                                                    | Cnrs                                                            | France                                                     |
| Nonnis Marzano, Carlotta  | Researcher in Zoology                                                  | University of Bari Aldo Moro                                    | Italy                                                      |
| Norberg, Peter            | PhD                                                                    | Ersta Sköndals Högskola                                         | Sweden                                                     |
| Norberg, Rolf Åke         | Docent Emeritus                                                        | Department of Biology and Environment, University of Gothenburg | Sweden                                                     |
| Norby, Richard            | Ecosystem ecologist                                                    | Oak Ridge, Tennessee                                            | United States of America (the)                             |
| Nord, Christina           | PhD Candidate                                                          | University of Lethbridge                                        | Canada                                                     |
| Nordeen, Jacqueline-      | B.S., Animal Science                                                   | University of Missouri-Columbia                                 | United States of America (the)                             |
| Norder, Sietze            | PhD candidate - Island Biogeography in the Quaternary and Anthropocene | Centre for Ecology, Evolution, and Environmental Changes (cE3c) | Portugal                                                   |
| Nordmann, Arne            | Engineering                                                            | Robert Bosch GmbH                                               | Germany                                                    |
| Noret, Nausicaa           | Plant biology                                                          | Université libre de Bruxelles                                   | Belgium                                                    |
| Norgaard, Richard B.      | Professor Emeritus of Energy and Resources                             | University of California, Berkeley                              | United States of America (the)                             |
| Nori, Javier              |                                                                        | Universidad Nacional de Córdoba                                 | Argentina                                                  |
| Noriega, Jorge Ari        | Research associate / Ecosystem services                                | Universidad de los Andes                                        | Colombia                                                   |
| Norlin, Andreas           | PhD student in Marine Biology                                          | Swansea University                                              | United Kingdom of Great Britain and Northern Ireland (the) |
| Norman, Jenny             | PhD                                                                    | University of Wollongong                                        | Australia                                                  |
| Normand, Frederic         | researcher in tropical horticulture                                    | CIRAD                                                           | Réunion                                                    |
| Normandeau, Magdalen      | Physics Instructor                                                     | University of New Brunswick                                     | Canada                                                     |
| norris, catrin            | Marine biologist                                                       | University of York                                              | United Kingdom of Great Britain and Northern Ireland (the) |
| North, Christopher        | Ecologist                                                              |                                                                 | United States of America (the)                             |
| North, Gretchen           | Professor of Biology                                                   | Occidental College                                              | United States of America (the)                             |

|                              |                                                               |                                                                        |                                                            |
|------------------------------|---------------------------------------------------------------|------------------------------------------------------------------------|------------------------------------------------------------|
| Northcutt MD, Alan           | Pathology/Dermatopathology                                    | Central Texas Pathology Laboratory                                     | United States of America (the)                             |
| norton, marieke              | PhD, Social Anthropology                                      | ACDI, University of Cape Town                                          | South Africa                                               |
| Norton, Michael              | Professor (retired)                                           | Tokyo Institute of Technology                                          | Japan                                                      |
| Norton, Briony               | Postdoctoral Researcher, Ecology                              | University of Derby                                                    | United Kingdom of Great Britain and Northern Ireland (the) |
| Norton, Philipp              | Postdoc, Computational Neuroscience                           | Humboldt Universität zu Berlin                                         | Germany                                                    |
| Norvez, Olivier              | Science outreach coordinator                                  | Biological Field Station of Paimpont - University of Rennes            | France                                                     |
| Nosetto, Marcelo             | Researcher                                                    | CONICET                                                                | Argentina                                                  |
| Not, Fabrice                 | Senior researcher in ecology and oceanography                 | CNRS                                                                   | France                                                     |
| Nothnagel, Axel              | Geodesist, Science Advisor, Consultant                        | Technische Universität Wien Department für Geodäsie und Geoinformation | Austria                                                    |
| Nou, Tida                    | Threatened Species Recovery Hub                               | University of Queensland                                               | Australia                                                  |
| Nougier, Marc                | Research Engineer                                             |                                                                        | France                                                     |
| Novaes, Roberto Leonan M.    | Researcher                                                    | Universidade Federal do Rio de Janeiro                                 | Brazil                                                     |
| Novaes, Renan                | Life cycle assessment                                         |                                                                        | Brazil                                                     |
| Novaes-e-Fagundes, Gabriel   | PhD student                                                   | Universidade Estadual de Santa Cruz (UESC)                             | Brazil                                                     |
| Novak, Lukas VF              | PhD Candidate, Evolutionary Protistology                      | Charles University                                                     | Czech Republic (the)                                       |
| Novak, Mark                  | Associate Professor, Ecology                                  | Oregon State University                                                | United States of America (the)                             |
| Novo, María                  | Full Professor/Chairholder                                    | UNESCO Chair in Environmental Education and Sustainable Development    | Spain                                                      |
| Novoa, Ana                   | Researcher                                                    | Institute of Botany, Academy of Sciences of the Czech Republic         | Czech Republic (the)                                       |
| Novoa, Carla                 | Plant Sociologist                                             | Institute of Geobotany, LUH                                            | Germany                                                    |
| Nowak, Katarzyna             | Fellow                                                        | The Safina Center                                                      | United States of America (the)                             |
| Nowak, Norman                | Research Scientist, Chemist                                   | Fraunhofer Institute for Toxicology and Experimental Medicine          | Germany                                                    |
| Nowell, Reuben               | Postdoctoral Researcher                                       | Imperial College London                                                | United Kingdom of Great Britain and Northern Ireland (the) |
| Noyola, Adalberto            | Senior researcher, environmental engineering                  | Instituto de Ingeniería UNAM                                           | Mexico                                                     |
| Nozal García, Vanesa         | PhD in Organic Chemistry                                      | Centro de Investigaciones Biológicas. CSIC                             | Spain                                                      |
| NTEP TONMAM, Noe Lucien      | Ph.D. Student in Ecology                                      | University of Douala                                                   | Cameroon                                                   |
| Ntloko, Bokang               | Land Management & Rehabilitation Coordinator                  | Letseng Deammk                                                         | Lesotho                                                    |
| Nuerk, Nicolai M.            | Researcher (Dr. rer. nat.) / Biodiversity & Plant Systematics | University of Bayreuth                                                 | Germany                                                    |
| Nüesch-Inderbilen, Magdalena | Microbiologist                                                | University of Zürich                                                   | Switzerland                                                |
| Nuijten, Rascha              | PhD candidate                                                 | NIOO-KNAW                                                              | Netherlands (the)                                          |
| Nukarinen, Ella              |                                                               | University of Vienna                                                   | Austria                                                    |
| Nunes, Pedro M. Sales        | Adjunct Professor, Zoology                                    | Universidade Federal de Pernambuco (UFPE)                              | Brazil                                                     |
| Nunes-Freitas, André Felipe  | Professor/ Forest Ecology                                     | Universidade Federal Rural do Rio de Janeiro                           | Brazil                                                     |
| NunesdaCunha, Catia          | Titular professor                                             | Federal university of Mato Grosso                                      | Brazil                                                     |

|                                   |                                                                   |                                                              |                                                            |
|-----------------------------------|-------------------------------------------------------------------|--------------------------------------------------------------|------------------------------------------------------------|
| Núñez, Karen Elizabeth            | PhD student                                                       | Instituto Potosino de Investigación Científica y Tecnológica | Mexico                                                     |
| Núñez Samudio, Virginia           | Medical Doctor                                                    | Instituto de Ciencias Médicas                                | Panama                                                     |
| Núñez Villalobos, María Alejandra | Urbanism                                                          | Independent Reserchear                                       | Mexico                                                     |
| Nunez-Mino, Jose                  | Director                                                          | Bat Conservation Trust                                       | United Kingdom of Great Britain and Northern Ireland (the) |
| Nunn, Patrick                     | Professor of Geography                                            | University of the Sunshine Coast                             | Australia                                                  |
| Nunn, Alana                       | Coral Reef Restoration Manager/ Ecology and Environmental Biology | University of North Carolina                                 | United States of America (the)                             |
| Nunnally, Clifton                 | Research Scientist Biological Oceanography                        | Louisiana Universities Marine Consortium                     | United States of America (the)                             |
| Nuriel, Perach                    | Geochemistry                                                      | Geological Survey Of Israel                                  | Israel                                                     |
| Nursamsi, Ilyas                   | Research Coordinator                                              | BICONS Indonesia                                             | Indonesia                                                  |
| Nusbaumer, David                  | Doctoral Researcher, Ecology & Evolution                          | University of Lausanne                                       | Switzerland                                                |
| Nusko, Robert                     | Vorstand / Chemist                                                | RAS AG                                                       | Germany                                                    |
| Nuss-Girona, Sergi                | Researcher / Environmental Scientist                              | University of Girona                                         | Spain                                                      |
| Nuttman, Clive                    |                                                                   | Tropical Biology Association                                 | United Kingdom of Great Britain and Northern Ireland (the) |
| Nuytinck, Jornde                  | Researcher                                                        | Naturalis Biodiversity Center                                | Netherlands (the)                                          |
| Nyanga, Charles                   | Marine Ecosystems Based Management and Climate Change             | Zambia College of Agriculture                                | Zambia                                                     |
| Nyarko, Samuel                    | PhD Candidate                                                     |                                                              | Belgium                                                    |
| Nygren, Anja                      | Professor, Development Studies                                    | University of Helsinki                                       | Finland                                                    |
| Nyhus, Philip                     | Associate Professor of Environmental Studies                      | Colby College                                                | United States of America (the)                             |
| Nylund, Amanda                    | PhD Student, Marine Science                                       | Chalmers University of Technology                            | Sweden                                                     |
| Nyssen, Jan                       | Senior Professor (physical geography)                             | Ghent University, Department of Geography                    | Belgium                                                    |
| Ó Broin, Eoin                     | Research fellow Energy System Modelling                           | EnvEcon                                                      | Ireland                                                    |
| O' Mahony, Rosella                | PhD Student                                                       | University College Cork                                      | Ireland                                                    |
| O'Born, Reyn                      | Associate Professor                                               | University of Agder                                          | Norway                                                     |
| O'Brien, Joshua                   | Ecologist                                                         |                                                              | United States of America (the)                             |
| O'Brien, Mary H.                  | Botanist; Utah Forests Program Director                           | Grand Canyon Trust                                           | United States of America (the)                             |
| O'Brien, Justine                  | Manager of Conservation Science                                   | Taronga Conservation Society Australia                       | Australia                                                  |
| O'Connell, Matthew                | Historical Ecology                                                | Charles Sturt University                                     | Australia                                                  |
| O'Connell, Anita                  | Teacher Earth Science and Biology                                 | Sydney uni                                                   | Australia                                                  |
| O'Connor, David                   | Postdoctoral Research Fellow                                      | Texas A&M University Corpus Christi                          | United States of America (the)                             |
| O'Connor, Patrick                 | Associate Professor Ecological Economics                          | The University of Adelaide                                   | Australia                                                  |
| O'Dea, Aaron                      | Staff Scientist                                                   | Smithsonian Tropical Research Institute                      | Panama                                                     |
| O'Donnell, Timothy                | Assistant Professor                                               | McGill University                                            | Canada                                                     |
| O'Dwyer, Jean                     | Lecturer in Environmental Science                                 | University College Cork                                      | Ireland                                                    |
| O'Flynn, Colette                  | Invasive Species Officer                                          |                                                              | Ireland                                                    |
| O'Hare, Adele                     | Psychology research assistant and provisional psychologist        | Queensland University of Technology                          | Australia                                                  |

|                         |                                                                   |                                                                      |                                                            |
|-------------------------|-------------------------------------------------------------------|----------------------------------------------------------------------|------------------------------------------------------------|
| O'Higgins, Paul         | Professor researching past human adaptations                      | University of York                                                   | United Kingdom of Great Britain and Northern Ireland (the) |
| O'Neill, Norm           | Professor                                                         | Université de Sherbrooke                                             | Canada                                                     |
| O'Reilly, Andrias       | Lecturer in Neurobiology                                          | Liverpool John Moores University                                     | United Kingdom of Great Britain and Northern Ireland (the) |
| O'Sullivan, Jane        | Honorary Senior Research Associate, Agriculture and Food Sciences | University of Queensland                                             | Australia                                                  |
| O' Brien, Justine       | Research Biologist, Conservation Science Manager                  | Taronga Conservation Society Australia                               | Australia                                                  |
| O' Connor, Louise       | PhD - biodiversity science                                        | Laboratoire d' écologie alpine                                       | France                                                     |
| Oakley, Hazel           | Managing Director                                                 | Tropical Research And Conservation Centre                            | Malaysia                                                   |
| Obbard, Martyn          | Emeritus Research Scientist                                       | Ontario Ministry of Natural Resources and Forestry                   | Canada                                                     |
| Oberding, Tomas J       | PhD, Ecological and Marine Research                               |                                                                      | United States of America (the)                             |
| Oberding, Tomáš         | Environmental Management faculty                                  | University of Phoenix                                                | United States of America (the)                             |
| Obiakara, Maxwell       | PhD Candidate                                                     | University of Ibadan                                                 | Nigeria                                                    |
| Obleitner, Friedrich    |                                                                   | University of Innsbruck                                              | Austria                                                    |
| Oborny, Beáta           | Associate Professor, Ecology                                      | Loránd Eötvös University, Budapest                                   | Hungary                                                    |
| Obradors, Xavier        | Research Professor / Materials Science                            | Institut Materials Science Barcelona (ICMAB - CSIC)                  | Spain                                                      |
| Obrist, Daniel          | Professor, Environmental Science                                  | University of Massachusetts, Lowell                                  | United States of America (the)                             |
| ocampo, valentina       | biologist master student                                          | barcelona university                                                 | Colombia                                                   |
| Ochoa, Luz              | Postdoctoral research                                             | Museu de Zoologia, Universidade de São Paulo                         | Brazil                                                     |
| Ochoa-Herrera, Valeria  | Professor, Environmental Engineering                              | Universidad San Francisco de Quito                                   | Ecuador                                                    |
| Ochoa-Sánchez, Ana      | PhD candidate in Water Resources                                  | University of Cuenca                                                 | Ecuador                                                    |
| OConnell, John          | Professor Emeritus, Chemical Engineering                          | University of Virginia, California Polytechnic State University, SLO | United States of America (the)                             |
| OConnell, Suzanne       | Professor, Earth & Environmental Sciences                         | Wesleyan University                                                  | United States of America (the)                             |
| OConnor, Barrrt         | Prof. Emeritus Ecology & Evolutionary Biology                     | University of Michigan                                               | United States of America (the)                             |
| Octaviano, Claudia      | General Coordinator for Climate Change Mitigation                 | National Institute of Ecology and Climate Change                     | Mexico                                                     |
| Oda, Tatiana            | PhD candidate on Civil Engineering                                | Universidade Federal de Viçosa                                       | Brazil                                                     |
| Odriozola, Iñaki        | Postdoc                                                           | Czech Academy of Sciences                                            | Spain                                                      |
| Oehri, Jacqueline       |                                                                   | University of Zurich                                                 | Switzerland                                                |
| Offre, Pierre           | Tenure Track Scientist - Microbiologist                           | NIOZ Royal Netherlands Institute for Sea Research                    | Netherlands (the)                                          |
| Oganesyan, Vaheh        | Sr. Scientist/Protein Crystallography                             | AstraZeneca                                                          | United States of America (the)                             |
| Ogbuigwe, Paul          | PhD Candidate                                                     | Massey University                                                    | New Zealand                                                |
| Ogg, Derek              | Chief Scientific Officer - Structural Biology                     | Peak Proteins Ltd.                                                   | United Kingdom of Great Britain and Northern Ireland (the) |
| Oggioni, Silvio Daniele | Ecology and Forestry                                              | European Forest Institute                                            | Germany                                                    |
| Ogren, Thomas           | allergy researcher/ horticulturist/ writer                        |                                                                      | United States of America (the)                             |
| Oguey, Christophe       | associate professor, physics                                      | University of Cergy-Pontoise                                         | France                                                     |
| ohara, willian          | Professor                                                         | Universidade Federal de Rondônia                                     | Brazil                                                     |
| Ohowski, Brian          | Advanced Lecturer                                                 | Loyola University Chicago                                            | United States of America (the)                             |
| Ojeda, Valeria          | Associate Researcher, Ecology                                     | CONICET                                                              | Argentina                                                  |
| Ojeda, Jaime            | Assistant Research                                                | Universidad de Magallanes                                            | Chile                                                      |

|                              |                                                                                     |                                                                                                                                                                                                  |                                |
|------------------------------|-------------------------------------------------------------------------------------|--------------------------------------------------------------------------------------------------------------------------------------------------------------------------------------------------|--------------------------------|
| Ojeda Luna, Tatiana          | Researcher                                                                          | Georg-August Universität Göttingen                                                                                                                                                               | Ecuador                        |
| Ojo, Theresa                 | PhD student                                                                         | University of Kwazulu natal, PMB, South Africa.                                                                                                                                                  | South Africa                   |
| Oklander, Luciana Ines       | Associate Researcher                                                                | CONICET                                                                                                                                                                                          | Argentina                      |
| Oklander, Luciana            | Associate Researcher                                                                | Consejo Nacional de Investigaciones Científicas y Técnicas, ARGENTINA. (National Scientific and Technical Research Council, CONICET)                                                             | Argentina                      |
| OKONI-WILLIAMS, ARNOLD       | SENIOR LECTURER AND HEAD OF DEPARTMENT                                              | BIOLOGICAL SCIENCES DEPT, FBC, UNIVERSITY OF SIERRA LEONE                                                                                                                                        | Sierra Leone                   |
| Oksanen, Tarja               | Senior Scientist, Ecology                                                           | UiT - The Arctic University of Norway and University of Turku, Finland                                                                                                                           | Norway                         |
| Oksanen, Lauri               | emeritus professor, ecology                                                         | UiT - The Arctic University of Norway and University of Turku, Finland                                                                                                                           | Norway                         |
| Oktaufik, MAM                | PhD., Principal Engineer, Renewable Energy & Energy Efficiency Engineering Research | BPPT                                                                                                                                                                                             | Indonesia                      |
| Olaru, Marian                | Postdoctoral researcher chemistry                                                   | FB2 biologie/chemie, Universität Bremen                                                                                                                                                          | Germany                        |
| Olberg, Robert               | Professor of Biological Sciences                                                    | Union College, Schenectady, NY                                                                                                                                                                   | United States of America (the) |
| Oldeland, Jens               | Ecologist                                                                           | University of Hamburg                                                                                                                                                                            | Germany                        |
| Oldeman, Arthur              | PhD Candidate                                                                       | Utrecht University                                                                                                                                                                               | Netherlands (the)              |
| Olea, Pedro P.               | Assitant Professor                                                                  | Dpto. Ecología, Universidad Autónoma de Madrid                                                                                                                                                   | Spain                          |
| Oleas, Nora                  | Associate Professor, Biology                                                        | Universidad Tecnológica Indoamérica                                                                                                                                                              | Ecuador                        |
| Olefs, Marc                  | Head of climate research, climatologist                                             | ZAMG                                                                                                                                                                                             | Austria                        |
| Olesen, Lars                 | CEO & Founder                                                                       | Circ.eco                                                                                                                                                                                         | Denmark                        |
| Oleson, Kirsten              | Ecological Economist                                                                | University of Hawaii at Manoa                                                                                                                                                                    | United States of America (the) |
| Oliet, Juan A.               | Full professor in Forestry                                                          | Universidad Politécnica de Madrd                                                                                                                                                                 | Spain                          |
| Oliosio, Albert              | Researcher                                                                          | INRA                                                                                                                                                                                             | France                         |
| Oliveir, Pedro               | Senior Scientist                                                                    | Mount Sinai School of Medicine                                                                                                                                                                   | United States of America (the) |
| Oliveira, Willams            | Master student in Plant Biology                                                     | Universidade Federal de Pernambuco                                                                                                                                                               | Brazil                         |
| Oliveira, Teresa             | Wildlife Ecology                                                                    |                                                                                                                                                                                                  | Portugal                       |
| Oliveira, Leonardo           | Adjunt professor                                                                    | Faculdade de Formação de Professores- (FFP/UERJ)                                                                                                                                                 | Brazil                         |
| Oliveira, Adriana            | researcher                                                                          | Universidade de Brasilia                                                                                                                                                                         | Brazil                         |
| Oliveira, Marcus             | Professor                                                                           | Universidade Estadual de Mato Grosso do Sul                                                                                                                                                      | Brazil                         |
| Oliveira, Emiliano Castro de | Professor / Geology                                                                 | Federal University of São Paulo                                                                                                                                                                  | Brazil                         |
| Oliveira, Daniel             | Biologist                                                                           | CIBIO-InBIO                                                                                                                                                                                      | Portugal                       |
| Oliveira, Nuno               | Marine Conservation Officer /:Biologist                                             | SPEA - Portuguese Society for the Study of Birds                                                                                                                                                 | Portugal                       |
| Oliveira, Cláudia            | Postdoctoral researcher in Biological Sciences                                      | Institute of Marine Research (IMAR) - University of the Azores                                                                                                                                   | Portugal                       |
| Oliveira, Flávio             | PhD student in Biology and Ecology of Global Changes                                | Department of Animal Biology and CESAM – Centre for Environmental and Marine Studies and Department of Animal Biology, Faculty of Sciences, University of Lisbon, Campo Grande, Lisbon, Portugal | Portugal                       |
| Oliver, Paul                 | Senior lecturer/Curator                                                             | Queensland Museum/Griffith University                                                                                                                                                            | Australia                      |
| Oliver, Margaret             | UT Herbarium collections manager                                                    | University of Tennessee, Knoxville                                                                                                                                                               | United States of America (the) |

|                              |                                                                         |                                                                                                  |                                                            |
|------------------------------|-------------------------------------------------------------------------|--------------------------------------------------------------------------------------------------|------------------------------------------------------------|
| Olivera Díaz, Domingo        | Profesor Investigador                                                   | Universidad Autónoma Chapingo                                                                    | Mexico                                                     |
| Oliveras, Imma               | Lecturer in Ecosystems Science                                          | University of Oxford                                                                             | United Kingdom of Great Britain and Northern Ireland (the) |
| Olivetti Belardinelli, Marta | Emeritus Professor - Sapienza University of Rome - Cognitive Psychology | Sapienza University of Rome                                                                      | Italy                                                      |
| Olivier, Léa                 | PhD student in Physical Oceanography                                    | LOCEAN - Sorbonne Université                                                                     | France                                                     |
| Olkowski, William            | Retired                                                                 | None                                                                                             | United States of America (the)                             |
| Öllerer, Kinga               | researcher                                                              | Institute of Biology Bucharest, Romanian Academy. MTA Centre for Ecological Research, Hungary    | Romania                                                    |
| Ollerhead, Katherine         | PhD student in Marine Biology                                           | University of Tasmania                                                                           | Australia                                                  |
| Ollerton, Jeff               | Professor of Biodiversity                                               | University of Northampton                                                                        | United Kingdom of Great Britain and Northern Ireland (the) |
| Ollinaho, Ossi               | post-doc, Development Studies                                           | University of Helsinki                                                                           | Finland                                                    |
| Ollivier, Mélodie            | phD student                                                             | Montpellier Supagro                                                                              | France                                                     |
| Olmo, Carla                  | Postdoc Ecology                                                         | University of Valencia                                                                           | Spain                                                      |
| Olmo, Gonzalo                | Theoretical Physics                                                     | University of Valencia                                                                           | Spain                                                      |
| Olmstead, Richard            | Professor of Biology and Herbarium Curator                              | University of Washington, Seattle                                                                | United States of America (the)                             |
| Olofsson, Malin              | Post doc                                                                | Department of Aquatic Sciences and Assessment at the Swedish University of Agricultural Sciences | Sweden                                                     |
| Olsen, Penny                 | Honorary pP                                                             | The Australian National University                                                               | Australia                                                  |
| Olsen, Knut                  | Staff Astronomer                                                        | National Optical Astronomy Observatory                                                           | United States of America (the)                             |
| Olthoff, Adriana Ema         | Postdoctoral Researcher                                                 | División Académica de Ciencias Biológicas, Universidad Juárez Autónoma de Tabasco                | Mexico                                                     |
| Olucha-Bordonau, Francisco   | Associate Professor in Anatomy                                          | Universitat Jaume I                                                                              | Spain                                                      |
| Ometto, Jean                 | Senior Researcher / Global Change                                       | National Institute for Space Research (INPE)                                                     | Brazil                                                     |
| Omeyer, Lucy                 | PhD researcher                                                          | University of Exeter                                                                             | United Kingdom of Great Britain and Northern Ireland (the) |
| Omoniyi, Gbenga              | Doctoral/écologie                                                       | Université de Rennes1                                                                            | France                                                     |
| Ondraczek, Janosch           | Environmental and Resource Economist / Energy Economist                 | University of Hamburg, Research Unit Sustainability and Global Change / European Investment Bank | Germany                                                    |
| Onkels, Fabian               | Geography / Climatology / Referat fuer Oekologie und Nachhaltigkeit     | Wuerzburg University                                                                             | Germany                                                    |
| Onstein, Renske              | Junior Research Group Leader Evolution & Adaptation                     | German Centre for Integrative Biodiversity Research (iDiv) Halle-Jena-Leipzig                    | Germany                                                    |
| Oomen, Rebekah               | Postdoctoral Fellow in Evolutionary Ecology                             | University of Oslo                                                                               | Norway                                                     |
| Oosthuizen, Tasha            | MSc student in Behavioral ecology                                       | University of Pretoria                                                                           | South Africa                                               |
| Opazo, Juan                  | Full Professor/Evolutionary Biology                                     | Universidad Austral de Chile                                                                     | Chile                                                      |
| Öpik, Maarja                 | senior researcher, plant and fungal ecology                             | University of Tartu                                                                              | Estonia                                                    |
| Oppenrieder, Niklas          | Medical Director                                                        | Physicians Association for Nutrition                                                             | Germany                                                    |
| Oppermann, Serpil            | Professor of Environmental Humanities                                   | Cappadocia University                                                                            | Turkey                                                     |
| oral, mert                   | Materials Science and Engineering                                       | Middle East Technical University                                                                 | Turkey                                                     |
| Orange, Didier               | Senior scientist, Ecohydrologist                                        | IRD                                                                                              | France                                                     |

|                           |                                                                                                 |                                                                                                    |                                                            |
|---------------------------|-------------------------------------------------------------------------------------------------|----------------------------------------------------------------------------------------------------|------------------------------------------------------------|
| Oras, Sven                | PhD                                                                                             | University of Tartu                                                                                | Estonia                                                    |
| Ordaz, Isabel             |                                                                                                 | Max Planck Institute for Evolutionary Anthropology                                                 | Germany                                                    |
| Ordeix, Marc              | Coordinator of the CERM                                                                         | Center for the Study of Mediterranean Rivers - University of Vic - Central University of Catalonia | Spain                                                      |
| Ordiz, Andres             | Researcher                                                                                      | Norwegian University of Life Sciences                                                              | Spain                                                      |
| Orellana, Daniel          | Principal Professor                                                                             | Universidad de Cuenca                                                                              | Ecuador                                                    |
| Oren, Ram                 | Professor                                                                                       | Duke University                                                                                    | United States of America (the)                             |
| Oriolo, Sebastian         | Researcher, Earth Sciences                                                                      | National Scientific and Technical Research Council                                                 | Argentina                                                  |
| Orizaola, German          | Senior Researcher, Biologist                                                                    | University of Oviedo                                                                               | Spain                                                      |
| Orkpeh, Uterdzua          | Plant Genetic Conservation                                                                      | National Horticultural Research Institute                                                          | Nigeria                                                    |
| Orlikowska, Ewa           | PhD Student Conservation Biology                                                                | Swedish University of Agricultural Sciences                                                        | Sweden                                                     |
| Ormeno, Elena             | Research Scientist                                                                              | CNRS                                                                                               | France                                                     |
| Orozco-Segovia, Alma      | Researcher                                                                                      | Instituto de Ecología, Universidad Nacional Autónoma de México                                     | Mexico                                                     |
| Orr, Matthew              | Associate Professor, Biology                                                                    | Oregon State University Cascades Campus                                                            | United States of America (the)                             |
| Orsag, Matej              | Postdoctoral researcher / evapotranspiration monitoring of agricultural landscape               | Global Change Research Institute CAS                                                               | Czech Republic (the)                                       |
| Ortega, Enrique           | Researcher                                                                                      | University of Campinas                                                                             | Brazil                                                     |
| Ortega, Fernando          | Postdoctoral - Ecology                                                                          | University of Jaén                                                                                 | Spain                                                      |
| Ortega, Zaida             | Postdoctoral Fellow / Ethology                                                                  | Universidade Federal de Mato Grosso do Sul                                                         | Brazil                                                     |
| Ortega-Perez, Fernando    | Researcher and full time professor, Health Sciences                                             | Universidad San Francisco de Quito                                                                 | Ecuador                                                    |
| Ortega-Recalde, Oscar     | PhD student Epigenetics and Developmental Biology                                               | University of Otago                                                                                | New Zealand                                                |
| Ortego, Joaquin           | Científico Titular                                                                              | Estación Biológica de Doñana (EBD-CSIC)                                                            | Spain                                                      |
| Ortinez, Abraham          | Researcher air quality and Climate change                                                       | Instituto nacional de ecología y cambio climático                                                  | Mexico                                                     |
| Ortiz, Santiago           | Professor Plant Sciences                                                                        | Universidade de Santiago de Compostela                                                             | Spain                                                      |
| Ortiz, Martin             | Lasers Applications                                                                             | Centro de Investigaciones en Optica, A.C.                                                          | Mexico                                                     |
| Ortiz Partida, Jose Pablo | Climate and Water Scientist                                                                     | Union of Concerned Scientists                                                                      | United States of America (the)                             |
| Ortiz-Rodríguez, Ivan A.  | PhD student- Data Science                                                                       | Scuola Normale Superiore                                                                           | Italy                                                      |
| Ortman, Tove              | PhD student                                                                                     | Swedish university of Agricultural Sciences                                                        | Sweden                                                     |
| Ortuno Crespo, Guillermo  | PhD candidate                                                                                   | Duke University                                                                                    | United States of America (the)                             |
| Osborne, Matthew          | Research Fellow, Behavioural Science                                                            | Stockholm Environment Institute                                                                    | Sweden                                                     |
| Osborne, Michael          | Preseident, International Union of History and Philosophy of Science and Technology (2020-2021) | Oregon State University                                                                            | United States of America (the)                             |
| Osei-Owusu, Yaw           | Conservation Scientist                                                                          | Conservation Alliance International                                                                | Ghana                                                      |
| Osemwegie, Isimemen       | Senior Researcher, West African Biodiversity & Ecosystem Services (WABES)                       | Center for Development Research, University of Bonn                                                | Germany                                                    |
| Osenberg, Craig W.        | Professor                                                                                       | University of Georgia                                                                              | United States of America (the)                             |
| Oshant Hawkins, Trica     | Conservation Education / Conservation Biology                                                   | Desert Laboratory at Tumamoc Hill                                                                  | United States of America (the)                             |
| Osiejuk, Tomasz           | Professor of biology                                                                            | Adam Mickiewicz University                                                                         | Poland                                                     |
| Oskarsson, Patrik         | Researcher                                                                                      | Dept of Rural and Urban Development                                                                | Sweden                                                     |
| Osman, Suhuur             | PhD/Chemistry                                                                                   |                                                                                                    | United Kingdom of Great Britain and Northern Ireland (the) |

|                             |                                                         |                                                                        |                                                            |
|-----------------------------|---------------------------------------------------------|------------------------------------------------------------------------|------------------------------------------------------------|
| Osofsky, Steven             | Professor, Wildlife Health & Health Policy              | Cornell University                                                     | United States of America (the)                             |
| Osorio-Aravena, Juan Carlos | Researcher                                              | Universidad Austral de Chile                                           | Chile                                                      |
| Osorno-Covarrubias, Javier  | Profesor, Geography                                     | Instituto de Geografia, Universidad Nacional Autónoma de México        | Mexico                                                     |
| Ospina-Alvarez, Natalia     | Research Scientist (Environmental Sciences)             | Catalan Institute for Water Research (ICRA)                            | Spain                                                      |
| Ossenkopf-Okada, Volker     | Lecturer/Astrophysics                                   | Universität zu Köln                                                    | Germany                                                    |
| Ossing, Franz               | Dipl.Meteorologist, retired, former head of GFZ PR Unit | GFZ German research Centre for Geosciences                             | Germany                                                    |
| Ossola, Alessandro          | Honorary Research Fellow                                | University of Melbourne                                                | Australia                                                  |
| Öst, Markus                 | University Lecturer                                     | Åbo Akademi University                                                 | Finland                                                    |
| Ostlie, Dale                | Emeritus Professor of Physics                           | Weber State University                                                 | United States of America (the)                             |
| Ostonen, Ivika              | Senior Researcher, Landscape Ecology                    | University of Tartu                                                    | Estonia                                                    |
| Oswald, Wyatt               | Professor of Science                                    | Emerson College                                                        | United States of America (the)                             |
| Oswald, Jessica             | Postdoctoral Researcher                                 | University of Florida                                                  | United States of America (the)                             |
| Otero, Jaime                | Associate professor                                     | Universidad Politécnica de Madrid                                      | Spain                                                      |
| Otero, Rodrigo A.           | Researcher in vertebrate paleontology                   | Universidad de Chile                                                   | Chile                                                      |
| Otero, Olga                 | Full Professor, Evolution & Environment                 | Université de Poitiers                                                 | France                                                     |
| Oteros-Rozas, Elisa         | PhD Sustainability Science                              | University of Vic                                                      | Spain                                                      |
| OTHMEN, RIADH               | POSTDOC                                                 | CNRS Institut Neel                                                     | France                                                     |
| Otley, Tim                  | Director Renewables- BSc MSc DMS                        | Suez                                                                   | United Kingdom of Great Britain and Northern Ireland (the) |
| Otruba, Paul                | Exec. Director Environmental Research                   | Enviro-neers                                                           | United States of America (the)                             |
| Ottelin, Juudit             | Postdoc                                                 | Aalto University                                                       | Finland                                                    |
| Otti, Oliver                | Evolutionary biologist                                  |                                                                        | Germany                                                    |
| Ottlé, Catherine            | Senior Scientist, Hydrology and Remote Sensing          | CNRS                                                                   | France                                                     |
| Ottley, Katrin              | Health science                                          | University of Otago                                                    | New Zealand                                                |
| Otto, Sarah                 | Professor                                               | University of British Columbia                                         | Canada                                                     |
| Ouayjan, Adib               | Temporary Lecturer and Research Assistant               | Université de Lorraine                                                 | France                                                     |
| Ouboter, Paul               | Director, ecologist                                     | Institute for Neotropical Wildlife and Environmental Studies (NeoWild) | Suriname                                                   |
| Oudar, Thomas               | Postdoctoral researcher                                 | CNRM/Météo-France                                                      | France                                                     |
| OUDE-EGBERINK, ISABELLE     | Social science                                          | University of the Sunshine Coast                                       | Australia                                                  |
| Oudin, Ludovic              | Lecturer in Hydrology                                   | Sorbonne University, UMR7619 METIS Paris                               | France                                                     |
| Oudman, Thomas              | Ecologist                                               | University of St Andrews                                               | United Kingdom of Great Britain and Northern Ireland (the) |
| Ouellet, J.D.               | Biologist MSc                                           | UQAR                                                                   | Canada                                                     |
| Ough dealy, Helen           | PhD candidate School of Science                         | AUT Auckland University of Technology                                  | New Zealand                                                |
| Ouillon, Sylvain            | Senior scientist                                        | French National Research Institute for Sustainable Development         | France                                                     |
| Oulton, Tate                | Research Assistant, Infection Biology                   | London School of Hygiene & Tropical Medicine                           | United Kingdom of Great Britain and Northern Ireland (the) |
| Oulu, Martin                | Human Ecologist                                         | University of Nairobi                                                  | Kenya                                                      |

|                               |                                                                                  |                                                              |                                                            |
|-------------------------------|----------------------------------------------------------------------------------|--------------------------------------------------------------|------------------------------------------------------------|
| OUTREMAN, Yannick             | Professor in Ecology                                                             | Agrocampus Ouest                                             | France                                                     |
| Outrequin, Clément            | PhD student in Environmental Geosciences/Isotopic Geochemistry                   | AMU                                                          | France                                                     |
| Ouvrard, Pierre               | Dr. Ing. / Entomology                                                            | UCL                                                          | France                                                     |
| Ouwehand, Janne               | postdoctoral researcher Animal Ecology                                           | University of Groningen                                      | Netherlands (the)                                          |
| Ovando, Norberto              | Profesor Licenciado en Ciencias Naturales                                        | Asociación de Parques Nacionales                             | Argentina                                                  |
| Overbeck, Gerhard             | Professor, Dept. of Botany                                                       | Universidade Federal do Rio Grande do Sul                    | Brazil                                                     |
| Overland, Benjamin            | Masters Student in Biological Sciences                                           | Swansea University                                           | United Kingdom of Great Britain and Northern Ireland (the) |
| Overman, Han                  | Environmental Consultant                                                         | Former Post-doc SUNY-ESF (USA)                               | Guyana                                                     |
| Owen, Chris                   | PhD Student, Genetics                                                            | University College London                                    | United Kingdom of Great Britain and Northern Ireland (the) |
| Owen, Candice                 | Lecturer in Entomology                                                           | Rhodes University                                            | South Africa                                               |
| Owens, Hannah                 | Postdoc, Biology                                                                 | University of Copenhagen                                     | Denmark                                                    |
| Owens, Christopher            | Doctoral candidate, public health                                                | University of New South Wales                                | Australia                                                  |
| Owsianny, Paweł M.            | Hydrobiologist, specialist in environmental protection and ecosystem functioning | Nadnotecki Institute UAM in Piła, Adam Mickiewicz University | Poland                                                     |
| Oxarango, Laurent             | Professor                                                                        | IGE / Université Grenoble Alpes                              | France                                                     |
| Oxenford, Hazel               | Professor of Marine Ecology and Fisheries                                        | University of the West Indies                                | Barbados                                                   |
| Ozinga, Wim                   | Researcher vegetation ecology                                                    | Wageningen University and Research                           | Netherlands (the)                                          |
| Ozpolat, Duygu                | Scientist, Principal Investigator                                                | Marine Biological Laboratory                                 | United States of America (the)                             |
| P. de Sá, Fábio               | PhD Candidate in Zoology                                                         | São Paulo State University                                   | Brazil                                                     |
| P.F. Trindade, Diego          | PhD Student                                                                      | University of Tartu                                          | Estonia                                                    |
| Pablo, RAGUET                 | étudiant en pédologie                                                            | AgroParisTech                                                | France                                                     |
| Pacheco, Gustavo              | Reesearch Technician / Enviromental Engineering                                  | Universidad de Cuenca                                        | Ecuador                                                    |
| Pacheco, Luis                 | Professor and Researcher                                                         | Universidad Mayor de San Andrés                              | Bolivia (Plurinational State of)                           |
| Pacheco-Portilla, Gustavo     | Environmental Engineering                                                        | Universidad de Cuenca                                        | Ecuador                                                    |
| Pacheco-Torgal, F.            | Principal Investigator - Civil Engineering                                       | University of Minho                                          | Portugal                                                   |
| Paciência, Filipa             | PhD student                                                                      | German Primate Center                                        | Germany                                                    |
| Paddon, Nigel                 | BSc Chemistry                                                                    |                                                              | United Kingdom of Great Britain and Northern Ireland (the) |
| Padial, Andre                 | Professor Ecology / Data analysis in Ecology                                     | Universidade Federal do Paraná                               | Brazil                                                     |
| Padilha, Danira               | Postdoctoral fellow                                                              | Universidade Federal de Goiás                                | Brazil                                                     |
| Padovesi Fonseca, Claudia     | Professor                                                                        | University of Brasilia                                       | Brazil                                                     |
| Paetkau, David                | President, Molecular Ecology                                                     | Wildlife Genetics International Inc.                         | Canada                                                     |
| Páez, Vivian                  | Ecology Professor                                                                | Instituto de Biología, Universidad de Antioquia              | Colombia                                                   |
| Páez de la Cadena, Francisco  | Professor                                                                        | Universidad de La Rioja                                      | Spain                                                      |
| Paez-Varas, Claudia           | MSc in Integrated Studies in Land and Food Systems                               | University of British Columbia                               | Canada                                                     |
| Pag, Felix                    |                                                                                  | University of Kassel                                         | Germany                                                    |
| Pagani, Laurent               | Astrophysicist                                                                   | Observatoire de Paris & CNRS                                 | France                                                     |
| PAGANO, MARCELA               | Biologist                                                                        |                                                              | Brazil                                                     |
| Paganucci de Queiroz, Luciano | Full Professor in Botany                                                         | Universidade Estadual de Feira de Santana                    | Brazil                                                     |

|                            |                                                  |                                                                |                                                            |
|----------------------------|--------------------------------------------------|----------------------------------------------------------------|------------------------------------------------------------|
| Page, Frank                | Professor of Sociology                           | University of Utahg                                            | United States of America (the)                             |
| Page, Stephen              | Veterinary Clinical Pharmacologist               | Advanced Veterinary Therapeutics                               | Australia                                                  |
| Page, David                | Population Geneticist, Disease Pathology - PhD   | University of Tasmania                                         | Australia                                                  |
| Page, Jay                  | Earth Science (Geology)                          | Retired                                                        | Canada                                                     |
| Pagella, Tim               | Lecturer/Researcher Agroforestry                 | Bangor University                                              | United Kingdom of Great Britain and Northern Ireland (the) |
| Pagès, Jordi               | Postdoctoral fellow in Ecology                   | University of Barcelona                                        | Spain                                                      |
| Paget, Nicolas             | Researcher                                       | CIRAD                                                          | France                                                     |
| Pagoto, Amerigo            | Postdoctoral Fellow in biomedical sciences       | Erasmus Medical Center                                         | Netherlands (the)                                          |
| Pai, Shriya                | PhD student in Physics                           | University of Colorado Boulder                                 | United States of America (the)                             |
| Paill, Wolfgang            | Head of National History Museum Graz, Biologist  | Universal Museum Joanneum GmbH                                 | Austria                                                    |
| Painter, Luke              | Ecologist, Instructor, Researcher                | Dept. of Fisheries and Wildlife, Oregon State University       | United States of America (the)                             |
| Paisley, Cherer            | Veterinary surgeon                               | Murdoch University                                             | Australia                                                  |
| Pajares Moreno, Silvia     | Associate resercher in Aquatic Microbial Ecology | National Autonomous University of Mexico                       | Mexico                                                     |
| Pajdak-Stós, Agnieszka     | Microbial ecologist                              | Institute of Environmental Sciences, Jagiellonian University   | Poland                                                     |
| Pajot, François            | Astrophysicist                                   | CNRS                                                           | France                                                     |
| Pal, Rupali                | Research Associate                               | Centre de sciences humaines                                    | India                                                      |
| Palá-Paúl, Jesús           | Professor - Botany                               | Universidad Complutense de Madrid                              | Spain                                                      |
| Palacín, Creu              | Associate Professor                              | University of Barcelona                                        | Spain                                                      |
| Palacio, Sara              |                                                  | IPE-CSIC                                                       | Spain                                                      |
| palacios, carmen           | associate professor                              |                                                                | France                                                     |
| Palacios, Rocio            | General Coordinator                              | Andean Cat Alliance                                            | Argentina                                                  |
| Palanchon, Marie           | Veterinarian                                     |                                                                | France                                                     |
| Palanica, Adam             | Behavioral Scientist                             | Klick Health                                                   | Canada                                                     |
| Palau Salvador, Guillermo  | Head of the Rural and Agrifood Department        | Technical University of Valencia                               | Spain                                                      |
| Palen, Stacy               | Full Professor, Physics                          | Weber State University                                         | United States of America (the)                             |
| Palenicek, Tomas           | Psychiatrist and researcher                      | National Institute of Mental Health, Czech republic            | Czech Republic (the)                                       |
| Palero, Ferran             | Postdoc                                          | University of Lodz                                             | Poland                                                     |
| Pales Espinosa, Emmanuelle | Research Associate Professor                     | Stony brook University                                         | United States of America (the)                             |
| Paletou, Frédéric          | full professor, astrophysics                     | Université Paul Sabatier, Observatoire Midi-Pyrénées, Toulouse | France                                                     |
| Palla, Kaitlin             | Botany Lecturer                                  | University of Tennessee - Knoxville                            | United States of America (the)                             |
| Palle, Angélique           | Research Fellow / Geography                      | IRSEM                                                          | France                                                     |
| Pallett, John              | Environmental Practitioner                       | Southern African Institute for Environmental Assessment        | Namibia                                                    |
| Pallewatte, Prof Nirmalie  | Professor                                        | University of Colombo                                          | Sri Lanka                                                  |
| Palma, Ana                 | Post doctoral research fellow                    | James Cook Univesity                                           | Australia                                                  |
| Palme, Ulrika              | Senior Lecturer Environmental Systems Analysis   | Technology Management and Economics                            | Sweden                                                     |
| Palmeirim, Jorge           | Associate Professor, Ecology                     | University of Lisbon, Faculty of Sciences                      | Portugal                                                   |
| Palmer, Meredith           | Postdoctoral Researcher                          | Princeton University                                           | United States of America (the)                             |

|                                   |                                                          |                                                                         |                                                            |
|-----------------------------------|----------------------------------------------------------|-------------------------------------------------------------------------|------------------------------------------------------------|
| Palmer, Tracy                     | Professor of Microbiology                                | Newcastle University                                                    | United Kingdom of Great Britain and Northern Ireland (the) |
| Palmer, Laura                     | Research Assistant                                       | University of St Andrews                                                | United Kingdom of Great Britain and Northern Ireland (the) |
| Palmer, Gregory                   | Lecturer of Environmental Science                        | Loyola University Chicago                                               | United States of America (the)                             |
| Palmer, Jason                     | Energy and Climate Change Researcher                     | Mr                                                                      | United Kingdom of Great Britain and Northern Ireland (the) |
| Palmer, Jonathan                  | Research Scientist                                       | University of New South Wales                                           | Australia                                                  |
| Palmer, Anthony                   | Principal Scientist                                      | Agricultural research council                                           | South Africa                                               |
| Palo, R.Thomas                    | Professor animal ecology                                 | Swedish University of Agricultural Sciences                             | Sweden                                                     |
| Palomares, Salvador               | Professor                                                | UASLP                                                                   | Mexico                                                     |
| Palomera Laforga, Isabel          | Marine biologie - retired                                | CSIC                                                                    | Spain                                                      |
| Palomino Gaviria, Angela Patricia | MSc Oceanography                                         | Universitat de Barcelona                                                | Spain                                                      |
| Palomo, Ignacio                   | Postdoctoral Researcher in Sustainability Science        | CNRS                                                                    | France                                                     |
| Palsson, Gisli                    | Archaeologist                                            | The Institute of Archaeology, Iceland                                   | United States of America (the)                             |
| Pálsson, Arnar                    | Professor, genetics                                      | University of Iceland                                                   | Iceland                                                    |
| Pálsson, Finnur                   | Project manager in glaciology                            | Institute of earth sciences, University of Iceland                      | Iceland                                                    |
| Palstra, Robert-Jan               | Senior Scientist/Molecular Biology                       | ErasmusMC                                                               | Netherlands (the)                                          |
| PALU, Marie                       | research ingeneer                                        | Cognitive Neuroimaging unit                                             | France                                                     |
| Palzer, Robert                    | Adjunct Professor of Chemistry (retired)                 | Southern Oregon University                                              | United States of America (the)                             |
| Pampuch, Timo                     | PhD student Landscape Ecology                            | University Greifswald                                                   | Germany                                                    |
| Pananceau, Marc                   | Assistant professor                                      | Paris-Sud & Paris-Saclay University                                     | France                                                     |
| Panazio, Cristiano                | Assistant Professor                                      | University of São Paulo                                                 | Brazil                                                     |
| Panchev, Peter                    | Microbiologist                                           |                                                                         | France                                                     |
| Panek, Piotr                      | chief specialist/bioindication, water quality monitoring | Chief Inspectorate for Environmental Protection                         | Poland                                                     |
| Panfil, Steven                    | Nature Conservation and Restoration                      | Conservation International                                              | United States of America (the)                             |
| Pang, Yi Heng                     | Postgraduate student                                     | Malaysian Primatological Society                                        | Malaysia                                                   |
| Panikkar, Bindu                   | Assistant Professor of Environmental Studies             | University of Vermont                                                   | United States of America (the)                             |
| Panisi, Martina                   | PhD candidate                                            | Lisbon University                                                       | Portugal                                                   |
| PANITZ, ERIC                      |                                                          | Ferris State University                                                 | United States of America (the)                             |
| Pannard, Alexandrine              | Assistant Professor / Ecology                            | University of Rennes                                                    | France                                                     |
| Pannebakker, Bart                 | Assistant Professor in Evolutionary Biology              | Laboratory of Genetics - Wageningen University                          | Netherlands (the)                                          |
| Pannunzio, Valeria                | PhD researcher                                           | Delft University of Technology                                          | Netherlands (the)                                          |
| Pansanel, Jérôme                  | Research engineer in computer science                    | CNRS                                                                    | France                                                     |
| Pante, Dr. Gregor                 | Researcher, Meteorologist                                | Karlsruhe Institute of Technology                                       | Germany                                                    |
| Panthou, Jeremy                   | Researcher, Climatology/hydrology                        | Institute of Environmental Geosciences (IGE), Grenoble-Alpes University | France                                                     |
| Panzer, Dr., Wolfram              | Leitender Oberarzt                                       | Klinikum Sindelfingen-Böblingen                                         | Germany                                                    |
| Paolini van Helfteren, Sebastian  | Researcher                                               | Wageningen University / Pachamama Raymi                                 | Netherlands (the)                                          |
| Paolucci, Lucas                   | Pos-doc Fellow / Ecologist                               | Federal University of Lavras                                            | Brazil                                                     |
| Papa, Roberto                     | Agricultural Genetics                                    | Università Politecnica delle Marche                                     | Italy                                                      |

|                          |                                                                         |                                                            |                                |
|--------------------------|-------------------------------------------------------------------------|------------------------------------------------------------|--------------------------------|
| Papa, Maria Nicolina     | Associate Professor                                                     | Civil Engineering Department of Salerno University         | Italy                          |
| Papa, Fabrice            | Directeur de Recherche                                                  | LEGOS, Institut de Recherche pour le Developpement, IRD    | France                         |
| Papadaki, Lydia          | Researcher                                                              | ICRE8                                                      | Greece                         |
| Papadimitriou, Filothei  | Chemist                                                                 |                                                            | Greece                         |
| papadopoulos, isabelle   | researcher                                                              | NMU                                                        | South Africa                   |
| Papadopoulou, Marina     | PhD candidate / Theoretical Biology                                     | University of Groningen                                    | Netherlands (the)              |
| Papageorgiou, Danai      | PhD student                                                             | Max Planck Institute of Animal Behavior                    | Greece                         |
| Papagiannakos, Dimitris  | Scientific consultant of a Member of the Hellenic Parliament            | Hellenic Parliament                                        | Greece                         |
| Papaloizos, Michael      | health scientist                                                        | Center for Hand Surgery                                    | Switzerland                    |
| Papazzoni, Cesare Andrea | Palaeontologist                                                         | Università di Modena e Reggio Emilia                       | Italy                          |
| Pape, Ellen              | Deep-sea biologist   Post-doctoral scientist                            | Ghent University                                           | Belgium                        |
| Papke, Armin             | Physician                                                               | Practice                                                   | Germany                        |
| Papp, Gergely            | Engineer                                                                | EMBL                                                       | France                         |
| Papp, Viktor             | Senior lecturer / Mycology                                              | Szent István University, Department of Botany              | Hungary                        |
| Paquet, Paul             | Adjunct Professor & Senior Scientist                                    | University of Victoria & Raincoast Conservation Foundation | Canada                         |
| Paquette, Cindy          | PhD Candidate, biological sciences                                      | Université du Québec à Montréal                            | Canada                         |
| Paradise, Christopher    | Professor of Biology                                                    | Davidson College                                           | United States of America (the) |
| Paranjpe, Arvin          | Technology Development Manager                                          | Oregon Health & Science University                         | United States of America (the) |
| Pardini, Renata          | Conservation Science                                                    | Institute of Bioscience - University of São Paulo          | Brazil                         |
| Pardo, Mercedes          |                                                                         | University Carlos III of Madrid                            | Spain                          |
| Pardo, Deborah           | Doctor in population ecology                                            | Independant                                                | France                         |
| Pardonnet, Sylvia        | Biology                                                                 | LBBE - CNRS - UCBL                                         | France                         |
| Paredes, Xoán M.         | Geography and Planning (MA, MPhil)                                      | IDG                                                        | Portugal                       |
| Parejo, Deseada          | Researcher                                                              | University of Extremadura                                  | Spain                          |
| Parent, Christine        | Associate Professor                                                     | University of Idaho                                        | United States of America (the) |
| PARENT, Philippe         | Reseacher                                                               | Cnrs                                                       | France                         |
| Parente, Jociery         | President                                                               | Fundação Mamíferos Aquáticos                               | Brazil                         |
| parera, anibal fernando  | Biologist ex-Coordinator The Alliance of the Grasslands (BirdLife Int.) | BirdLife International                                     | Argentina                      |
| Pares-Sierra, Alejandro  | Research Scientist, Oceanography                                        | Centro de investigación y estudios Superiores de Ensenada  | Mexico                         |
| Parey, Sylvie            | Research Engineer climate change impact, energy, extreme events         |                                                            | France                         |
| Pargana, Katerina        | Postdoc                                                                 | Ghet University                                            | Belgium                        |
| Parigi, Fabio            | Clean energy                                                            |                                                            | Italy                          |
| Parihar, Anuj            | Project Scientist                                                       | Meghalaya Climate Change Centre                            | India                          |
| Paris, Margot            | Postdoc in evolutionary biology                                         | University of Fribourg                                     | Switzerland                    |
| Paris, Mathilde          | Researcher in Biology                                                   | CNRS, Institut de Genomique Fonctionnelle de Lyon          | France                         |

|                             |                                                               |                                                   |                                                            |
|-----------------------------|---------------------------------------------------------------|---------------------------------------------------|------------------------------------------------------------|
| Paris, Josephin             | Postdoctoral Researcher in Evolutionary Genomics              | University of Exeter                              | United Kingdom of Great Britain and Northern Ireland (the) |
| Parisi, Monica              | Retired Environmental Scientist / Graduate Student of Ecology | University of California, Davis                   | United States of America (the)                             |
| Parizot, Etienne            | Dr. Prof. in Astrophysics                                     | University of Paris / Astroparticle and Cosmology | France                                                     |
| Park, Taejin                | PhD Student                                                   | Boston University                                 | United States of America (the)                             |
| Parker, Thomas              | Research Fellow                                               | University of Stirling                            | United Kingdom of Great Britain and Northern Ireland (the) |
| Parker, Darren J.           | Postdoctoral fellow / Evolutionary Biology                    | University of Lausanne                            | Switzerland                                                |
| Parker, Michael             | Professor of Biology                                          | Southern Oregon University                        | United States of America (the)                             |
| Parker, Eugene              | Professor Emeritus/Geography and Environmental Systems        | University of Maryland Baltimore County           | United States of America (the)                             |
| Parmentier, Eric            | Fuu Professor Biology                                         | University of Liege                               | Belgium                                                    |
| Parncutt, Jacqui            | BSc, MPH                                                      | University of Melbourne                           | Australia                                                  |
| Parncutt, Richard           | Professor for Systematic Musicology                           | University of Graz                                | Austria                                                    |
| Paro, Cláudia Moreno        | Biologist - PhD Conservation and Research                     |                                                   | Brazil                                                     |
| Parodi, Mauro               | Full Professor - Mathematical methods forma engineers         | Università of Genova                              | Italy                                                      |
| Parra, Navarrete            | Environmental biology                                         | Universidad de Chile                              | Chile                                                      |
| Parra, Gema                 | Tenured lecturer                                              | UNIVERSITY OF JAÉN                                | Spain                                                      |
| Parra Bueno, Paula          | Research Scientist                                            | Max Planck Florida Institute                      | United States of America (the)                             |
| parsons, daniel             | Prof Sedimentology                                            | Univ Of Hull                                      | United Kingdom of Great Britain and Northern Ireland (the) |
| Parsons, Martin             | CEng CEnv FIAgrE                                              | Institution of Agricultural Engineers             | United Kingdom of Great Britain and Northern Ireland (the) |
| Parsons, E.C.M.             | Conservation & Environmental Science                          | University of Glasgow                             | United Kingdom of Great Britain and Northern Ireland (the) |
| Parsons, David              | Carnivore Conservation Biologist                              | The Rewilding Institute                           | United States of America (the)                             |
| Pärtel, Meelis              | Professor of botany                                           | University of Tartu                               | Estonia                                                    |
| Partida-Martinez, Laila P.  | Professor                                                     | CINVESTAV - Irapuato                              | Mexico                                                     |
| Parvin, Shahnaj             | Post doctoral fellow                                          | Southern Cross University                         | Australia                                                  |
| Pasanen, Miia               | PhD Candidate, Plant Pathology                                | University of Helsinki                            | Finland                                                    |
| Pasanen-Mortensen, Marianne | Postdoctoral researcher in Animal ecology                     | Stockholm University                              | Sweden                                                     |
| Pascal, Mathilde            | Epidemiologist                                                |                                                   | France                                                     |
| Pascal, Thiébeau            | Agronome                                                      | INRA                                              | France                                                     |
| Pascale, Dietrich-Ragon     | Sociologue                                                    | INED                                              | France                                                     |
| Pascale, Celine-Marie       | Sociology                                                     | American University                               | United States of America (the)                             |
| Paschke, Mark               | Professor of Restoration Ecology                              | Colorado State University                         | United States of America (the)                             |
| Pascon, Renata              | University professor                                          | Federal University of São Paulo                   | Brazil                                                     |
| Pascual, Miguel             | Researcher                                                    | IPEEC-CENPAT-CONICET                              | Argentina                                                  |
| Pascual Roman, Eduardo      | Senior Anesthesiologist                                       | Hospital Denia                                    | Spain                                                      |
| Pashay Ahi, Ehsan           | Researcher / biology                                          | Uppsala University                                | Sweden                                                     |

|                         |                                               |                                                                            |                                                            |
|-------------------------|-----------------------------------------------|----------------------------------------------------------------------------|------------------------------------------------------------|
| Pasotti, Francesca      | Post doc Fellow                               | Ghent University                                                           | Belgium                                                    |
| Pasquet, Sylvain        |                                               | Institut de Physique du Globe de Paris - CNRS                              | France                                                     |
| Pasquini, Lorena        | Research Fellow, Climate Change Adaptation    | University of Cape Town                                                    | South Africa                                               |
| Passaler, Linnea        | Doctor & Surgeon                              | –                                                                          | Italy                                                      |
| Pastana, Murilo         | Post Doctorate fellow                         | Museu de Zoologia da Universidade de São Paulo - USP                       | Brazil                                                     |
| Pasteau, Palmyre        | Master student - Ecology                      | Université Paris Saclay                                                    | France                                                     |
| Pastor, Nina            | Professor                                     | Universidad Autonoma del Estado de Morelos                                 | Mexico                                                     |
| Pastor, Amandine        | Researcher                                    | Faculdade de Ciencias de Lisboa (CE3C)                                     | Portugal                                                   |
| Pastore, José Floriano  | Botany                                        | Universidade Federal de Santa Catarina                                     | Brazil                                                     |
| Pastorino, Guido        | Researcher                                    | Museo Argentino de Ciencias Naturales "Bernardino Rivadavia"               | Argentina                                                  |
| Pásztor, Liz            | associate professor                           | MTA Centre for Ecological Research                                         | Hungary                                                    |
| Patarra, Rita           | Aquaculture                                   | Expolab and cE3c - Centre for Ecology, Evolution and Environmental Changes | Portugal                                                   |
| Pate PhD, MSc, David W. | Director                                      | CASIL                                                                      | Canada                                                     |
| Patel, Vibhuti          | PhD Researcher                                | University of Sheffield                                                    | United Kingdom of Great Britain and Northern Ireland (the) |
| Patel, Neem             | PhD Candidate in Microbiology                 | UC Berkeley                                                                | United States of America (the)                             |
| Patelli, Niccolò        | PhD in Supply Chain Traceability              | University of Modena and Reggio Emilia                                     | Italy                                                      |
| Paterno, Gustavo Brant  | Postdoctoral fellow                           | Universidade Federal do Rio Grande do Norte (UFRN)                         | Brazil                                                     |
| Paternoster, Giulia     | PhD student in Epidemiology and Biostatistics | University of Zurich                                                       | Switzerland                                                |
| Paterson, James         | University Teacher in Carbon Management       | University of Edinburgh                                                    | United Kingdom of Great Britain and Northern Ireland (the) |
| Patey, Tony             | Social Scientist                              | Independent                                                                | United Kingdom of Great Britain and Northern Ireland (the) |
| Patience, Richard       | Petroleum Geochemist                          | Albion Petroleum Geochemistry LLC                                          | United States of America (the)                             |
| Patkó, Ferenc           | Zoológia - Ökológia kutatója , tanára         | Kutatás - ZOOROYAL Egyesület ,                                             | Romania                                                    |
| Patomäki, Heikki        | Professor of World Politics                   | University of Helsinki                                                     | Finland                                                    |
| Patrick, Michael        | Research Assistant                            | Eawag                                                                      | Switzerland                                                |
| Patriksson, Michael     | Professor of applied mathematics              | Chalmers University of Technology                                          | Sweden                                                     |
| Patterson, David        | Professor Emeritus                            | University of Sydney, Australia.                                           | Australia                                                  |
| Pattison, Zarah         | Lecturer in Environmental Sciences            | Newcastle University                                                       | United Kingdom of Great Britain and Northern Ireland (the) |
| Patton, James L         | Professor Emeritus                            | Museum of Vertebrate Zoology, University of California, Berkeley           | United States of America (the)                             |
| Patton, John            | Biotech Scientist                             | Dance Biopharm                                                             | United States of America (the)                             |
| Patton, Austin          | Ph.D Candidate, Biology                       | Washington State University                                                | United States of America (the)                             |
| Patton, Nicholas        | PhD students                                  | University of Queensland                                                   | Australia                                                  |
| Pätzig, Marlene         | Postdoc                                       | Leibniz Centre for Agricultural Landscape Research (ZALF) e.V.             | Germany                                                    |
| Pauchard, Anibal        | Professor in Ecology                          | Universidad de Concepción                                                  | Chile                                                      |

|                             |                                                                     |                                                                                                     |                                                            |
|-----------------------------|---------------------------------------------------------------------|-----------------------------------------------------------------------------------------------------|------------------------------------------------------------|
| paul, Josephat              | Environmental psychology                                            | University of Rwanda                                                                                | Rwanda                                                     |
| Paul, Maitry                | Doctoral Researcher                                                 | University of Helsinki, Finland                                                                     | Finland                                                    |
| Paul, Bryan                 | Postgraduate Student                                                | Jeffrey Sachs Center on Sustainability Development, Sunway University                               | Malaysia                                                   |
| Paul-Marie, GUINCHARD       | Ing Environnement                                                   |                                                                                                     | France                                                     |
| Paulay, Gustav              | Professor                                                           | University of Florida                                                                               | United States of America (the)                             |
| Paule, BENIT                | PhD, IR (physiopathologie et thérapie des maladies mitochondriales) | INSERM U1141                                                                                        | France                                                     |
| Pauli, Harald               | plant ecologist                                                     | GLORIA-Coordination, Austrian Academy of Sciences & BOKU University Vienna                          | Austria                                                    |
| Pauli, Natasha              | Lecturer, Environmental Geography                                   | The University of Western Australia                                                                 | Australia                                                  |
| Paulino-Afonso, Ana         | Postdoctoral Fellow, Astronomy and Astrophysics                     | Centro de Astrofísica e Gravitação, Instituto Superior Técnico                                      | Portugal                                                   |
| Pausata, Francesco          | Professor in Climate Dynamics                                       | UQAM                                                                                                | Canada                                                     |
| Pausch, Franziska           | Marine Biologist/PhD student                                        | Alfred Wegener Institute, Helmholtz Center for Polar and Marine Research                            | Germany                                                    |
| Pauthenet, Etienne          | postdoctoral researcher                                             | Laboratoire d'Océanographie et du Climat : Expérimentations et Approches Numériques (LOCEAN)        | France                                                     |
| Pauwels, Ine                | Aquatic Ecologist                                                   | Research Institute for Nature and Forest, Belgium                                                   | Belgium                                                    |
| Pavia, Edgar                | Scientist                                                           | CICESE                                                                                              | Mexico                                                     |
| Pavlaki, Maria              | Assistant Researcher                                                | Department of Biology and CESAM, University of Aveiro                                               | Portugal                                                   |
| Pavlek, Martina             | postdoc, Biology                                                    | Rudjer Boskovic Institute                                                                           | Croatia                                                    |
| Pavlicev, Mihaela           | Professor, Evolutionary Biology                                     | University of Vienna                                                                                | Austria                                                    |
| Pavlinec, Željko            | Molecular biologist                                                 | Croatian Veterinary Institute, Zagreb // University of Zagreb, Faculty of Science                   | Croatia                                                    |
| Pavlushchick, Tatiana       | researcher, ornithologist                                           | Scientific-practical Centre of the National Academy of Sciences of Belarus for Biological Resources | Belarus                                                    |
| Pavón Paneque, Altai Carlos | PhD student                                                         | University of Seville                                                                               | Spain                                                      |
| Pavón-Jordán, Diego         | postdoctoral researcher                                             | Norwegian Institute for Nature Research                                                             | Norway                                                     |
| Pawar, Sayali               | Research Assistant (GIS and Climate change)                         | Swansea University                                                                                  | United Kingdom of Great Britain and Northern Ireland (the) |
| Pawelec, Alicja             | phD student - biology                                               | University of Warsaw                                                                                | Poland                                                     |
| Pawlikowski, Paweł          | assistant professor; vegetation ecology                             | University of Warsaw, Faculty of Biology                                                            | Poland                                                     |
| Pawula, Florent             | PhD in Physics                                                      | Université de Bordeaux                                                                              | France                                                     |
| Pay, James                  | PhD student                                                         | University of Tasmania                                                                              | Australia                                                  |
| Payan, Sebastien            | Professor in Atmospheric Physics                                    | Sorbonne Université                                                                                 | France                                                     |
| Payne, Richard              | Oceanographer Emeritus                                              | Woods Hole Oceanographic Institution                                                                | United States of America (the)                             |
| Payo-payo, Ana              | Theoretical Ecology Research Fellow                                 | Doctor                                                                                              | United Kingdom of Great Britain and Northern Ireland (the) |
| PAYRASTRE, Bernard          | Professor                                                           | University of Toulouse 3                                                                            | France                                                     |

|                           |                                                                |                                                                                                                                                             |                                                            |
|---------------------------|----------------------------------------------------------------|-------------------------------------------------------------------------------------------------------------------------------------------------------------|------------------------------------------------------------|
| Payraudeau, Sylvain       | Professor in Hydrology                                         | National School for Water and Environmental Engineering - University of Strasbourg                                                                          | France                                                     |
| Payri, Claude             | Senior scientist                                               | French Institut for research for development IRD                                                                                                            | New Caledonia                                              |
| Paz, Claudia              | Postdoc researcher                                             | Sao Paulo State University                                                                                                                                  | Brazil                                                     |
| Paz-Vinas, Ivan           | Post-doc / Molecular Ecology and Conservation Genetics         | Université de Toulouse, UMR 5174, Laboratoire Évolution et Diversité Biologique (EDB)                                                                       | France                                                     |
| Pazderkova, Marketa       | Researcher / Biophysics                                        | Charles University                                                                                                                                          | Czech Republic (the)                                       |
| Pe'er, Guy                | Conservation Biologist                                         | German Centre for Integrative Biodiversity Research (iDiv) Halle-Jena-Leipzig, UFZ - Helmholtz Centre for Environmental Research, and University of Leipzig | Germany                                                    |
| Péan, Thibault            | PhD Candidate                                                  | Catalonia Institute for Energy Research IREC                                                                                                                | Spain                                                      |
| Pearcy, William           | biological oceanography                                        | Oregon State Univ.                                                                                                                                          | United States of America (the)                             |
| Pearse, William           | Assistant Professor of Biology                                 | Utah State University                                                                                                                                       | United States of America (the)                             |
| Pearson, Ben              | Geomorphologist                                                |                                                                                                                                                             | Australia                                                  |
| Pearson, Richard          | Emeritus Professor, Ecology                                    | James Cook Uni                                                                                                                                              | Australia                                                  |
| Pearson, David            | Professor, School of the Environment                           | Laurentian University                                                                                                                                       | Canada                                                     |
| Peaucelle, Marc           | Postdoctoral researcher in ecology and environment             | Ghent University                                                                                                                                            | Belgium                                                    |
| Pebsworth, Paula          | Primateology                                                   | The University of Texas San Antonio                                                                                                                         | United States of America (the)                             |
| Pecchio, Maydelin         | Infectious diseases                                            | Instituto de Ciencias Médicas                                                                                                                               | Panama                                                     |
| Peck, Mika                | Senior Lecturer in Conservation Biology                        | University of Sussex                                                                                                                                        | United Kingdom of Great Britain and Northern Ireland (the) |
| Peckarsky, Barbara        | Emeritus Professor - Aquatic Ecology                           | University of Wisconsin Madison                                                                                                                             | United States of America (the)                             |
| Pecl, Greta               | Director, Centre for Marine Socioecology                       | University of Tasmania                                                                                                                                      | Australia                                                  |
| Peco, Begoña              | Professor of Ecology                                           | Universidad Autonoma de Madrid                                                                                                                              | Spain                                                      |
| Pecquerie, Laure          | Researcher / Marine Ecology                                    | IRD                                                                                                                                                         | France                                                     |
| Pecqueur, David           | Microbial ecologist                                            | CNRS                                                                                                                                                        | France                                                     |
| Pecuchet, Laurene         | Postdoctoral researcher                                        |                                                                                                                                                             | Norway                                                     |
| Pedraza, Manuel           | Carcinologist                                                  |                                                                                                                                                             | Colombia                                                   |
| Pedraza Jiménez, Verónica | PhD Biosciences and Agrifood Sciences with a research contract | IAS-CSIC                                                                                                                                                    | Spain                                                      |
| Pedrosa Harand, Andrea    | Associate Professor                                            | Universidade Federal de Pernambuco, Recife/PE                                                                                                               | Brazil                                                     |
| Peel, Joanne              | PhD biology and health sciences                                | UAM                                                                                                                                                         | Mexico                                                     |
| Pegalajar Jurado, Antonio | Postdoctoral Researcher                                        | Technical University of Denmark                                                                                                                             | Denmark                                                    |
| Pegoretti, Valentina      | PhD student in Molecular Neurobiology                          | University of Groningen                                                                                                                                     | Netherlands (the)                                          |
| Pei, Kurtis Jai-Chyi      | Professor/ Wildlife Ecology, Conservation and Management       | Institute of Wildlife Conservation, National Pingtung University of Science & Technology                                                                    | Taiwan                                                     |
| Peinetti, Raul            | Associated professor                                           | Universidad Nacional de La Pampa                                                                                                                            | Argentina                                                  |
| Peixoto, Ariane Luna      | Pesquisador Afiliado                                           | Instituto de Pesquisas Jardim Botânico do Rio de Janeiro                                                                                                    | Brazil                                                     |
| Peixoto, Paulo Enrique    | Professor                                                      | Universidade Federal de Minas Gerais                                                                                                                        | Brazil                                                     |
| Peixoto, Luiz             | PosDoc                                                         | MZUSP                                                                                                                                                       | Brazil                                                     |
| Pejchar, Liba             | Associate Professor                                            | Colorado State University                                                                                                                                   | United States of America (the)                             |

|                          |                                                                      |                                                              |                                                            |
|--------------------------|----------------------------------------------------------------------|--------------------------------------------------------------|------------------------------------------------------------|
| Pekar, Stephen           |                                                                      | Queens College, City University of NY                        | United States of America (the)                             |
| Pelé, Anne-Laure         | Optical physics                                                      | CNRS                                                         | France                                                     |
| Pelé, Marie              | Animal behaviour / Cognition                                         | Université de Strasbourg                                     | France                                                     |
| peleg, gili              | Lecturer                                                             | HIT Israel                                                   | Israel                                                     |
| Peleg, Ofer              | C.S.O Bioinformatics and Molecular Biology                           | Genaphora Ltd                                                | Israel                                                     |
| Pelejero, Carles         | ICREA Research Professor                                             | Institut de Ciències del Mar, CSIC                           | Spain                                                      |
| Pelet, Serge             | Lecturer Biology                                                     | University of Lausanne                                       | Switzerland                                                |
| Pellicice, Fernando      | Professor                                                            | Universidade Federal do Tocantins                            | Brazil                                                     |
| Pellarin, Thierry        | Researcher in hydrology                                              | Institute of Environmental Geosciences (IGE), CNRS           | France                                                     |
| Pellaud, Francine        | Pr.Dr. Science education - Education for sustainable development     | HEP FR                                                       | Switzerland                                                |
| Pellegrini, Lorenzo      | Associate Professor, Economics of Environment and Development        | Erasmus University Rotterdam                                 | Netherlands (the)                                          |
| Pellens, Roseli          | Macroecologist                                                       | Museum National d'Histoire naturelle                         | France                                                     |
| Pelletier, Nathan        | Assistant Professor                                                  | University of British Columbia                               | Canada                                                     |
| Pellicciari, Simone      | Research Assistant                                                   | Newcastle University                                         | United Kingdom of Great Britain and Northern Ireland (the) |
| Pellizari, Vivian        | Associate Professor                                                  | University of Sao Paulo                                      | Brazil                                                     |
| Pellizari, Vivian Helena | Associate Professor                                                  | Oceanographic Institute. University of Sao Paulo             | Brazil                                                     |
| Pellkofer, Sarah         | PhD plant ecology & soil science                                     | University of Zurich                                         | Switzerland                                                |
| Pels, Christophe         | Research Technician                                                  | UCLouvain                                                    | Belgium                                                    |
| Pelser, Pieter           | Associate Professor in Systematic Botany                             | University of Canterbury                                     | New Zealand                                                |
| Peltier, Carly S.        | PhD candidate                                                        | Columbia University                                          | United States of America (the)                             |
| Peluso, Livia            | PhD Candidate in Ecology and Evolution                               | Universidad Austral de Chile                                 | Chile                                                      |
| Pena-Ramirez, Yuri Jorge | Tropical Tree Biotechnology                                          | El Colegio de la Frontera Sur                                | Mexico                                                     |
| Peñaloza, Diego          | Researcher / Industrial Ecology                                      | IVL Swedish Environmental Research Institute                 | Sweden                                                     |
| Peñaranda, Diego         | PhD student in Ecology and Evolutionary Biology                      | Universidad de Chile                                         | Chile                                                      |
| Peñaranda, Victor        | Doctoral student                                                     | Universidad Nacional de Colombia                             | Colombia                                                   |
| Peñas, Francisco J.      | Postdoc Researcher                                                   | Environmental Hydraulics Institute - University of Cantabria | Spain                                                      |
| Peñas, Julio             | Professor of Botany and Biogeography                                 | University of Granada                                        | Spain                                                      |
| Pende, Marko             | PhD Student/Neuroscience                                             |                                                              | Austria                                                    |
| Pende, Nika              | Postdoc; Prokaryotic Cell Biology                                    | Institut Pasteur                                             | France                                                     |
| Pender, Robyn            | Building physicist                                                   | Historic England                                             | United Kingdom of Great Britain and Northern Ireland (the) |
| Pendleton, Steve         | Physics                                                              | Warwickshire County Council                                  | United Kingdom of Great Britain and Northern Ireland (the) |
| Pengelley, David         | Professor Emeritus, Mathematics                                      | New Mexico State University                                  | United States of America (the)                             |
| PENGUE, WALTER ALBERTO   | ECOLOGICAL ECONOMICS                                                 | GEPAMA UNIVERSITY OF BUENOS AIRES                            | Argentina                                                  |
| Penha, Thales            | Geographer/Ms in Remote Sensing/ PhD CAndidate in Physical Geography | University of São Paulo                                      | Brazil                                                     |

|                              |                                                 |                                                                                         |                                                            |
|------------------------------|-------------------------------------------------|-----------------------------------------------------------------------------------------|------------------------------------------------------------|
| Peniche, Gabriela            | PhD student                                     | University of Edinburgh                                                                 | United Kingdom of Great Britain and Northern Ireland (the) |
| Penn, Jill                   | Assistant Professor of Biology                  | Georgia Gwinnett College                                                                | United States of America (the)                             |
| Penner, Amber                | Flood Forecasting Hydrologist                   |                                                                                         | Canada                                                     |
| Penner, Joyce                | Professor of Atmospheric Science                | University of Michigan                                                                  | United States of America (the)                             |
| Penner, Johannes             | Senior Scientist / Biology                      | University of Freiburg                                                                  | Germany                                                    |
| Penning, Ellis               | Senior researcher aquatic ecology               | Deltares                                                                                | Netherlands (the)                                          |
| Penone, Caterina             | Postdoctoral researcher - Ecology               | University of Bern                                                                      | Switzerland                                                |
| Penot, Eric                  | researcher                                      | CIRAD UMR Innovation                                                                    | France                                                     |
| Penteriani, Vincenzo         | permanent researcher, animal ecology            | Spanish Council for Scientific Research (CSIC)                                          | Spain                                                      |
| Penuelas, Josep              | Research Professor in Global Ecology            | CSIC-CREAF                                                                              | Spain                                                      |
| Peper, Eva                   | PhD candidate in MRI research                   | Academic Medical Center (AMC)                                                           | Netherlands (the)                                          |
| Pepin, Pierre                | Senior scientist                                | Memorial University                                                                     | Canada                                                     |
| Pequeno, Pedro               | Ecology                                         | Federal University of Roraima                                                           | Brazil                                                     |
| Peralta, Luciano             | Doctorando en ciencias biológicas               | Universidad Nacional de Mar del Plata                                                   | Argentina                                                  |
| Peralta, Guadalupe           | Postdoctoral Fellow                             | University of Canterbury                                                                | New Zealand                                                |
| Peralta, Ariane              | Assistant Professor of Microbial Ecology        | East Carolina University                                                                | United States of America (the)                             |
| Peralta Sánchez, Juan Manuel | Postdoc                                         | University of Granada                                                                   | Spain                                                      |
| Percival, Anthony            | Graduate Student, Horticulture                  | Colorado State University                                                               | United States of America (the)                             |
| Perdereau, Olivier           | Researcher in Cosmology                         | IN2P3/CNRS                                                                              | France                                                     |
| Perea Paizal, Julia          | PhD Candidate                                   | Imperial College London                                                                 | United Kingdom of Great Britain and Northern Ireland (the) |
| pereira, luis                | Professor Emeritus, Water Resources and Climate | universidade de Lisboa                                                                  | Portugal                                                   |
| Pereira, Joana               | Assistant Researcher                            | CESAM, University of Aveiro                                                             | Portugal                                                   |
| Pereira, Adriana             | environmental engineer                          | Aveiro University                                                                       | Portugal                                                   |
| Pereira, Mariana             | PhD candidate                                   | Donders Institute for Brain and Cognition                                               | Netherlands (the)                                          |
| Pereira, Paulo               | Professor/Environmental Sciences                | Mykolas Romeris Univeristy                                                              | Lithuania                                                  |
| Pereira, Luís Filipe         | PhD Student in Biology                          | CIBIO                                                                                   | Portugal                                                   |
| Pereira, Luis                | Prof. Emeritus, agriculture water management    | University of Lisbon                                                                    | Portugal                                                   |
| Pereira Coutinho, Miguel     | Sociologist                                     | Universidade Algarve                                                                    | São Tomé and Príncipe                                      |
| Perelberg, Amir              | Manager, Ecological & Landscape Surveys Unit    | Open Landscape Institute, The Steinhardt Museum of Natural History, Tel Aviv University | Israel                                                     |
| PEREÑA, JAIME                | BIOLOGY PHD                                     | AULA DEL MAR DE MÁLAGA                                                                  | Spain                                                      |
| Perenon, Louis               | Cosmology                                       | University of the Western Cape                                                          | South Africa                                               |
| Peres, Carlos                | Professor of Ecology                            | University of East Anglia                                                               | United Kingdom of Great Britain and Northern Ireland (the) |
| Peretti, Alfredo             | Associate Professor, Zoologist                  | Universidad Nacional de Córdoba                                                         | Argentina                                                  |
| Pereyra, Martín O.           | Dr.                                             | Instituto de Biología Subtropical-CONICET                                               | Argentina                                                  |
| Perez, Denise                | Marine Biologist                                |                                                                                         | Northern Mariana Islands (the)                             |
| Perez, Paul                  | MD, PhD in Epidemiology                         | Bordeaux University Hospital                                                            | France                                                     |
| Perez, Ilan                  | Research associate in Fisheries                 | Agrocampus Ouest Rennes                                                                 | France                                                     |

|                                 |                                                                                               |                                                              |                                                            |
|---------------------------------|-----------------------------------------------------------------------------------------------|--------------------------------------------------------------|------------------------------------------------------------|
| Perez, Maria Eugenia            | Chemistry Professor                                                                           | CURE - Udelar                                                | Uruguay                                                    |
| Perez, Analia                   | Biologist/ Science Teacher                                                                    | Craighouse School                                            | Chile                                                      |
| Perez, Grégoire                 | Ecologist                                                                                     |                                                              | France                                                     |
| Pérez, Martín                   | PhD student                                                                                   | Universidad de Burgos                                        | Spain                                                      |
| Pérez, Diego                    | Proffesor, Ecology and Environmental Pollution                                                | Universidad Nacional Andres bello                            | Chile                                                      |
| Perez Baliero, Maria del Carmen | Biologist                                                                                     | Water Supply Company                                         | Uruguay                                                    |
| Perez Bissaro, Cassiana         | Biologist                                                                                     | Prefeitura Municipal de Ribeirão Preto, SP                   | Brazil                                                     |
| Perez Campo, Flor María         | Assistant Professor                                                                           | Universidad de Cantabria                                     | Spain                                                      |
| Pérez Farinós, Gema             | Researcher                                                                                    | Centro de Investigaciones Biológicas, CSIC                   | Spain                                                      |
| Perez Gamote, Ringo             | Senior Research Associate                                                                     | Hochschule Luzern                                            | Switzerland                                                |
| Pérez Hernández, Cisteil Xinum  | Postdoctoral researcher                                                                       | National Autonomous University of Mexico                     | Mexico                                                     |
| Perez Vega, Catherine           | Doctoral Candidate in Biology, Interdisciplinary research - Light Pollution and Ecophysiology | Leibniz Institute of Freshwater Ecology and Inland Fisheries | Germany                                                    |
| Pérez Viñuela, Javier           | Postdoctoral researcher / limnologist                                                         | University of the basque country                             | Spain                                                      |
| Perez-Calpe, AV                 | PhD student                                                                                   | University of the Basque Country                             | Spain                                                      |
| Pérez-Contreras, Tomás          | Researcher                                                                                    | University of Granada                                        | Spain                                                      |
| Pérez-García, Juan Manuel       | Postdoctoral researcher in Ecology                                                            | Universidad Miguel Hernández                                 | Spain                                                      |
| Perez-Garijo, Ainhoa            | Research Associate                                                                            | The Rockefeller University                                   | United States of America (the)                             |
| Pérez-Luque, Antonio Jesús      | Researcher / Ecology                                                                          | University of Granada                                        | Spain                                                      |
| Pérez-Martínez, Carmen          | ecologist                                                                                     | University of Granada                                        | Spain                                                      |
| Pérez-Méndez, Néstor            | Researcher                                                                                    | IRNAD                                                        | Spain                                                      |
| Pérez-Ortega, Sergio            | Senior scientist                                                                              | Real Jardín Botánico (CSIC)                                  | Spain                                                      |
| Pérez-Pérez, Antonio            | Scientific                                                                                    | Hospital Universitario Virgen Macarena                       | Spain                                                      |
| Pérez-Quintero, Juan Carlos     | Biologist. Professor of Zoology, Faculty of Experimental Sciences                             | Department of Integrated Sciences, University of Huelva      | Spain                                                      |
| Perez-Rovira, Patricia          | Botanist                                                                                      | Vaersa - Generalitat Valenciana                              | Spain                                                      |
| Pérez-Salicrup, Diego R         | Researcher Ecology of Forest Reseources                                                       | Universidad Nacional Autónoma de México                      | Mexico                                                     |
| Pérez-Stuardo, Diego            | PhD student                                                                                   | Universidad Mayor                                            | Chile                                                      |
| Pérez-Tris, Javier              | Professor - Zoology                                                                           | Complutense University of Madrid                             | Spain                                                      |
| Perezgasga, Lucia               | Molecular microbiology                                                                        | National Autonomous University of Mexico (UNAM)              | Mexico                                                     |
| PERICARD, Jean-Marie            | VETERINARIAN Doctor in Veterinary Medicine                                                    | VETO FAUNE                                                   | France                                                     |
| Perier, Aurélie                 | PhD / biology                                                                                 |                                                              | France                                                     |
| Perilli, Alessia                | Postdoc in Physics                                                                            | Tel Aviv University                                          | Israel                                                     |
| Perin, Rodrigo                  | Scientist                                                                                     | EPFL                                                         | Switzerland                                                |
| Perina, Fernando                | Postdoctoral Researcher                                                                       | São Paulo State University - UNESP                           | Brazil                                                     |
| Périquet, Stéphanie             | Resident Scientist-Behaviour and spatial ecology                                              | Ongava Research Centre                                       | Namibia                                                    |
| Perissinotto, Renzo             | Honorary Professor, Marine Science                                                            | Nelson Mandela University                                    | South Africa                                               |
| Perkins-Taylor, Ian             | Fish and Wildlife Biologist                                                                   | U.S. Fish and Wildlife Service                               | United States of America (the)                             |
| Pernetta, Angelo                | Principal Lecturer in Environmental Biology                                                   | University of Brighton                                       | United Kingdom of Great Britain and Northern Ireland (the) |
| Perona, John                    | Professor of Environmental Biochemistry                                                       | Portland State University                                    | United States of America (the)                             |

|                      |                                                                     |                                                                                   |                                                            |
|----------------------|---------------------------------------------------------------------|-----------------------------------------------------------------------------------|------------------------------------------------------------|
| Perosa, Bruno        | Professor and Researcher on Environmental and Agriculture Economics | Federal University of Uberlandia                                                  | Brazil                                                     |
| Perrault, Sébastien  |                                                                     | ENPC Ponts Paris Tech                                                             | France                                                     |
| perrier, christian   | former Director of laboratory / Astrophysicist                      | OSUG - Univ. Grenoble Alpes                                                       | France                                                     |
| perrier, charles     | Researcher                                                          | CNRS                                                                              | France                                                     |
| Perrin, Abigail      | Postdoctoral Research Scientist                                     | The Francis Crick Institute                                                       | United Kingdom of Great Britain and Northern Ireland (the) |
| Perrin, Charles      | Hydrology                                                           | Irstea                                                                            | France                                                     |
| Perrin, Guy          | Astronomer                                                          | Paris Observatory                                                                 | France                                                     |
| Perrin, Nicolas      | Professor, Ecology & Evolution                                      | University of Lausanne                                                            | Switzerland                                                |
| Perrin, Coline       | Researcher                                                          | INRA                                                                              | France                                                     |
| Perro, Michelle      | MD                                                                  | GMOScience.org                                                                    | United States of America (the)                             |
| Perry, Holly         | Lecturer in Medical Laboratory Sciences                             | Auckland University of Technology                                                 | New Zealand                                                |
| Perry, George        | Professor, Environmental Science                                    | University of Auckland                                                            | New Zealand                                                |
| Perry, Allison       |                                                                     | Oceana                                                                            | Spain                                                      |
| Perry, Jim           | Professor                                                           | University of Minnesota                                                           | United States of America (the)                             |
| Perry, David         | Professor (emeritus)                                                | Oregon State University                                                           | United States of America (the)                             |
| Perry, Edward        | aquatic biologist                                                   | US Fish and Wildlife Service                                                      | United States of America (the)                             |
| Persico, Andrea      | Biologist                                                           | Pro Natura Ticino                                                                 | Switzerland                                                |
| Person, Renaud       | Modeling engineer in marine biogeochemistry                         | IRD                                                                               | France                                                     |
| Persson, Tomas       | Associate Professor                                                 | Dalarna University (Högskolan Dalarna), School of Technology and Business Studies | Sweden                                                     |
| pertoldi, cino       | professor in conservation genetics                                  | Aalborg University                                                                | Denmark                                                    |
| Pertoldi, Cino       | Professor in Conservation Biology                                   | Aalborg University                                                                | Denmark                                                    |
| Perumal, Balu        | Head of Conservation                                                | Malaysian Nature Society                                                          | Malaysia                                                   |
| Pesce, Diego         | Postdoc                                                             | University of Wageningen                                                          | Netherlands (the)                                          |
| Pesce, Stéphane      | Senior Researcher in Aquatic Microbial Ecology and Ecotoxicology    | Irstea                                                                            | France                                                     |
| Pescott, O.L.        | Plant Ecologist                                                     | Centre for Ecology & Hydrology                                                    | United Kingdom of Great Britain and Northern Ireland (the) |
| Pessato, Anais       | PhD candidate                                                       | CIE - Deakin university                                                           | Australia                                                  |
| Pessi, Igor          | Postdoctoral Researcher, Microbial Ecology                          | University of Helsinki                                                            | Finland                                                    |
| Pestana, João        | Researcher ( Ecotoxicology)                                         | University of Aveiro & CESAM                                                      | Portugal                                                   |
| Petean, Flavia       | PhD student in Systematics and Evolution                            | Universidade Federal do Rio Grande do Norte                                       | Brazil                                                     |
| Petean Bove, Claudia | Professor                                                           | Museu Nacional, Universidade Federal do Rio de Janeiro                            | Brazil                                                     |
| Peter, Jakob         | PhD                                                                 | EWI                                                                               | Germany                                                    |
| Peter, Craig         | Associate Professor, Department of Botany                           | Rhodes University                                                                 | South Africa                                               |
| Peter, Francisc      | Professor                                                           | University Politehnica of Timisoara                                               | Romania                                                    |
| Peterman, Randall    | Professor Emeritus                                                  | School of Resource and Environmental Management, Simon Fraser University          | Canada                                                     |
| Petermann, Holger    | Geologist                                                           |                                                                                   | United States of America (the)                             |

|                       |                                                     |                                                                                 |                                                            |
|-----------------------|-----------------------------------------------------|---------------------------------------------------------------------------------|------------------------------------------------------------|
| Petermann, Jana       | Associate Professor, Biosciences                    | University of Salzburg                                                          | Austria                                                    |
| Peters, Daniel        | Post-doctoral Research Associate/Synthetic Biology  |                                                                                 | United Kingdom of Great Britain and Northern Ireland (the) |
| Peters, Stefan        |                                                     | UniSA-NBE                                                                       | Australia                                                  |
| Peters, Greg          | Professor of Quantitative Sustainability Assessment | Chalmers University of Technology                                               | Sweden                                                     |
| Peters, Kevin         | Ph.D. Materials Science Engineer, also Entrepreneur | Northwestern University, also Terrestrial Ecosystems Research Associates        | United States of America (the)                             |
| Peters, Mark          | PA-C Emeritus                                       |                                                                                 | United States of America (the)                             |
| Peters, Szarah        | Medecin                                             | Universität Heidelberg (zi Mannheim)                                            | Germany                                                    |
| Peters, Lena          |                                                     | Kiel University                                                                 | Germany                                                    |
| Peters, Richard L.    | Postdoc                                             | Ghent University                                                                | Belgium                                                    |
| Peters, Judith        | Professor in physics                                | Université Grenoble Alpes                                                       | France                                                     |
| Petersen, Hauke       | Researcher                                          | Freie Universität Berlin                                                        | Germany                                                    |
| Petersen, Mareike     | Researcher                                          | Museum für Naturkunde Berlin                                                    | Germany                                                    |
| Petersen, Stefan      | Scientific research Assistant and Project Manager   | TU Berlin                                                                       | Germany                                                    |
| Peterson, Christopher | Professor - Aquatic Ecology                         | Loyola University Chicago                                                       | United States of America (the)                             |
| Peterson, Anna        | Conservation Biologist                              | University of Minnesota                                                         | United States of America (the)                             |
| Petit, Sophie         | Associate Professor of Wildlife Ecology             | University of South Australia                                                   | Australia                                                  |
| Petit, Laurent        | Researcher in Neuroscience                          | CNRS                                                                            | France                                                     |
| Petit, Jean Robert    | Emeritus scientist /Glaciology                      | IGE-univ Grenoble Alpes                                                         | France                                                     |
| Petit Bon, Matteo     | PhD candidate                                       | The University Centre in Svalbard (UNIS), The Arctic University of Norway (UiT) | Norway                                                     |
| Petkov, Nikolai       | Ornithology                                         | Bulgarian Society for the Protection of Birds                                   | Bulgaria                                                   |
| Petracca, Lisanne     | Conservation Scientist                              | Panthera                                                                        | United States of America (the)                             |
| PETRENKO, Anne        | Professor - Oceanographer                           | MIO                                                                             | France                                                     |
| PETRETTO, Marie       | Conservation Biologist                              | Marwell Wildlife                                                                | United Kingdom of Great Britain and Northern Ireland (the) |
| Petridou, Maria       | PhD student                                         | University of Ioannina                                                          | Greece                                                     |
| Petrocelli, Antonella | Researcher                                          | Institute for Water Research - CNR                                              | Italy                                                      |
| Petrou, Katherina     | Senior Lecturer                                     | University of Technology Sydney                                                 | Australia                                                  |
| Petrucci, Romina      | Astronomer                                          | IA-UNAM                                                                         | Mexico                                                     |
| Petrucchio, Enrico    | Principal Scientist                                 | Johnson Matthey                                                                 | United Kingdom of Great Britain and Northern Ireland (the) |
| Petrucio, Mauricio    | Senhor Professor                                    | Federal University of Santa Catarina - UFSC/Brazil                              | Brazil                                                     |
| Petry, Cláudia        | Professor                                           | Universidade de Passo Fundo - UPF                                               | Brazil                                                     |
| Petry, Ana            | Professor                                           | Federal University of Rio de Janeiro                                            | Brazil                                                     |
| Pettersen, Amanda     | Postdoctoral fellow                                 | Lund University                                                                 | Sweden                                                     |
| Pettersson, Katarina  | Researcher                                          | Swedish University of Agricultural Sciences                                     | Sweden                                                     |
| Pettex, Emeline       | Marine ecologist                                    | La Rochelle Université                                                          | France                                                     |
| Pettorelli, Nathalie  | Senior Research Fellow                              | Institute of Zoology                                                            | United Kingdom of Great Britain and Northern Ireland (the) |
| Petty, Ross           | Professor Emeritus, Pediatrics                      | University of British Columbia                                                  | Canada                                                     |

|                       |                                                                            |                                                                               |                                                            |
|-----------------------|----------------------------------------------------------------------------|-------------------------------------------------------------------------------|------------------------------------------------------------|
| Petz, Marcus          | Social Science and Public Policy                                           | University of Jyväskylä                                                       | Finland                                                    |
| Peugeot, Christophe   | Researcher, Hydrologist                                                    | French National Research Institute for Development (IRD)                      | France                                                     |
| Peyton Jones, Meg     | PhD student (Cell Biology)                                                 | University of Edinburgh                                                       | United Kingdom of Great Britain and Northern Ireland (the) |
| Pezaro, Nadav         | Postdoctoral Fellow                                                        | University of Haifa                                                           | South Africa                                               |
| Pfaff, Claas-Thido    | Ecology                                                                    | Special Botany And Functional Biodiversity                                    | Germany                                                    |
| Pfannerstill, Eva     | Doctoral researcher                                                        |                                                                               | Germany                                                    |
| Pfeiffer, Mirjam      |                                                                            | Senckenberg Biodiversity and Climate Research Centre                          | Germany                                                    |
| Pfeiffer, Sven        | PhD Candidate in Aerospace Engineering                                     | TU Delft                                                                      | Netherlands (the)                                          |
| Pfeilsticker, Klaus   | Environmental Physics                                                      | University of Heidelberg                                                      | Germany                                                    |
| Pfenniger, Daniel     | Professor of Astrophysics                                                  | University of Geneva                                                          | Switzerland                                                |
| Pfreundt, Ulrike      | Postdoc Marine Sciences                                                    | ETH Zürich                                                                    | Switzerland                                                |
| Phakisi, Tshepo       | Environmental Health Practitioner - Climate & Health Researcher            | University of Cape Town                                                       | South Africa                                               |
| PHAM, Jean-Louis      | Senior Scientist                                                           | Institut de recherche pour le développement                                   | France                                                     |
| Pham-Truffert, Myriam | Research Scientist                                                         | CDE, University of Bern                                                       | Switzerland                                                |
| Philip, Justine       | PhD Ecosystem Management and Environmental History                         | Museum Victoria (Associate)                                                   | Australia                                                  |
| Philipp, Sonja        | Adjunct Professor in Geology                                               | University of Göttingen                                                       | Germany                                                    |
| Philipp, Madison      | Biology MSc student                                                        | Memorial university of Newfoundland                                           | Canada                                                     |
| Philippe, Boltenhagen | Physics                                                                    | CNRS                                                                          | France                                                     |
| Philippe, Durand      | Enseignant chercheur                                                       | Agroparistech                                                                 | France                                                     |
| Philippe, Gontier     | Software engineer working on animal health and welfare                     | INRA                                                                          | France                                                     |
| Philippe, Charlotte   | PhD in Biology                                                             | KULeuven                                                                      | Belgium                                                    |
| Philips, Mari-Anne    | PhD Biomedicine                                                            | University of Tartu                                                           | Estonia                                                    |
| Phillipp, Rhodri      | Ecologist                                                                  |                                                                               | United Kingdom of Great Britain and Northern Ireland (the) |
| Phillips, John G.     | Postdoctoral Fellow in Biological Sciences                                 | University of Idaho                                                           | United States of America (the)                             |
| Phillips, Molly       | Natural History Collections Professional                                   | Florida Museum of Natural History                                             | United States of America (the)                             |
| Phillips, Helen       | Post Doc                                                                   | German Center for Integrative Biodiversity Research (iDiv) Halle-Jena-Leipzig | Germany                                                    |
| Phillips, Amy         | Medical Doctor                                                             | NHS                                                                           | United Kingdom of Great Britain and Northern Ireland (the) |
| Phillips, Helen       | Associate Professor and Physical Oceanographer                             | University of Tasmania                                                        | Australia                                                  |
| Phillis, Anastasia    | Physicist, currently masters student production and management engineering | Technical university of Crete                                                 | Greece                                                     |
| Phillis, Nili         | Ecology                                                                    | Retired                                                                       | Greece                                                     |
| Phillis, Yannis       | Professor Emeritus                                                         | Technical University of Crete                                                 | Greece                                                     |
| Philpot, William      | Professor (Remote Sensing)                                                 | Civil & Environmental Engineering, Cornell University                         | United States of America (the)                             |

|                          |                                                                                                         |                                                                          |                                                            |
|--------------------------|---------------------------------------------------------------------------------------------------------|--------------------------------------------------------------------------|------------------------------------------------------------|
| Phoma, Sandra            | PhD candidate in Marine Microbiology and Genomics                                                       | University of Pretoria                                                   | South Africa                                               |
| PIASECKI, Fabien         | Information and Communication Science                                                                   | Association Sciences Citoyennes                                          | France                                                     |
| Piątkowski, Jakub        | Research Assistant, Biology                                                                             | Faculty of Biology, University of Warsaw                                 | Poland                                                     |
| Piazzì, Gaia             | Postdoctoral researcher / Hydrology                                                                     | IRSTEA                                                                   | France                                                     |
| Picanco, Ana             | PhD scholarship                                                                                         | University of Azores                                                     | Portugal                                                   |
| PICART PICOLO, Ariadna   | PhD molecular biology                                                                                   | Laboratoire Génome et Développement des Plantes (UMR5096: CNRS-UPVD)     | Andorra                                                    |
| Picazo, Felix            | Post-doctoral researcher in macroecology                                                                | Nanjing Institute of Geography and Limnology                             | China                                                      |
| Piccardi, Philippe       | Ecology and Evolution                                                                                   | University of Lausanne                                                   | Switzerland                                                |
| Piccardo, Paolo          | Professor Metallurgy                                                                                    | University of Genoa                                                      | Italy                                                      |
| Picchi, Malayka Samantha | Research Assistant in Applied Entomology                                                                | Sant'Anna School of Advanced Studies                                     | Italy                                                      |
| PICCIN, Luca             | phD student                                                                                             | CIRAD                                                                    | France                                                     |
| Picco, Lorenzo           | Assistant Professor - Fluvial Geomorphologist                                                           | Dept. Land, Environment, Agriculture and Forestry - University of Padova | Italy                                                      |
| Pichevin, Laetitia       | marine geochemist                                                                                       | University of Edinburgh                                                  | United Kingdom of Great Britain and Northern Ireland (the) |
| Pichler, Arthur          | PhD candidate                                                                                           | University of Vienna                                                     | Austria                                                    |
| pichon, noémie           | PhD student - Ecology                                                                                   |                                                                          | Switzerland                                                |
| Pichot, Christian        | Researcher                                                                                              | INRA                                                                     | France                                                     |
| Pickard, Barbara         | Faculty fellow, NSF Center for Engineering Biomechanics and Faculty, Electrical and Systems Engineering | Washington University in St Louis                                        | United States of America (the)                             |
| Pickering, Kim           | Associate Dean (Research), Division of Health, Engineering, Computing and Science                       | University of Waikato                                                    | New Zealand                                                |
| Pickering, Nigel         | Reseach Associate Professor/Water Resoruces Engineer                                                    | Washington State University                                              | United States of America (the)                             |
| Pickett, Simon           | Ecologist                                                                                               | Bat Conservation Ireland                                                 | Ireland                                                    |
| Pickett, Kate            | Professor of Epidemiology                                                                               | University of York                                                       | United Kingdom of Great Britain and Northern Ireland (the) |
| Piclet, Jules            | Medical doctor                                                                                          | Aix marseille university                                                 | France                                                     |
| Picó, Sara               | PhD Student                                                                                             | Centro Biología Molecular Severo Ochoa                                   | Spain                                                      |
| Pieczarka, Julio         | Full Professor / genetics                                                                               | Universidade Federal do Para                                             | Brazil                                                     |
| Piedade, Maria Teresa F. | Senior Researcher                                                                                       | Instituto Nacional de Pesquisas da Amazônia - INPA                       | Brazil                                                     |
| Piek, Marjolein          |                                                                                                         | Skåne hospital, Lund                                                     | Sweden                                                     |
| Piel, Tim                | Phd student                                                                                             | University of Amaterdam                                                  | Netherlands (the)                                          |
| Piera, Jaume             | Tenured Scientist                                                                                       | Institute of Marine Sciences (ICM-CSIC)                                  | Spain                                                      |
| Pierce, Benjamin         | Henry Salvatori Professor of Computer and Information Science                                           | University of Pennsylvania                                               | United States of America (the)                             |
| PIERCE, ELIN             | Wildlife Biologist/Ecology                                                                              | GOVT                                                                     | United States of America (the)                             |
| PIERCE, Ph.D., ELIN      | Wildlife Biologist                                                                                      | GOVT                                                                     | United States of America (the)                             |
| Pierotti, Raymond        | Biologist                                                                                               | University of Kansas                                                     | United States of America (the)                             |

|                        |                                                                        |                                                                                                  |                                                            |
|------------------------|------------------------------------------------------------------------|--------------------------------------------------------------------------------------------------|------------------------------------------------------------|
| Pierre-Henri, Fabre    | Associate Researcher in Zoology, Evolution and Ecology                 | Institut des Sciences de l'Evolution de Montpellier                                              | France                                                     |
| Piers, Kenneth         | Professor Emeritus, Chemistry                                          | Calvin University                                                                                | United States of America (the)                             |
| Piersma, Theunis       | Professor - Rudi Drent Chair in Global Flyway Ecology                  | University of Groningen and NIOZ Royal Netherlands Institute for Sea Research                    | Netherlands (the)                                          |
| Pierson, Donald        | Senior Research Scientist Limnology                                    | Uppsala University                                                                               | Sweden                                                     |
| Pieruschka, Roland     | Senior Scientist / Plant Sciences                                      | Forschungszentrum Jülich                                                                         | Germany                                                    |
| Pietroluongo, Guido    | Doctor of Veterinary Medicine, Conservationist                         | Archipelagos Institute of Marine Conservation                                                    | Italy                                                      |
| Pietsch, Katherina     | PhD                                                                    | University of Leipzig                                                                            | Germany                                                    |
| pigeau, benjamin       | Physics                                                                | CNRS                                                                                             | France                                                     |
| Pignati, Marco         | PhD in Electrical Engineering                                          | Swiss Federal Institute of Technology                                                            | Switzerland                                                |
| Pigot, Alex            | Royal Society University Research Fellow                               | UCL                                                                                              | United Kingdom of Great Britain and Northern Ireland (the) |
| Piikkila, Erik         | Forest and Watershed Ecologist                                         | Wildwood Ecoforest, Yellowpoint Ecological Society, Coastal Douglas-fir Conservation Partnership | Canada                                                     |
| Pijanowska, Joanna     | Professor/Ecology                                                      | University of Warsaw                                                                             | Poland                                                     |
| Pilastro, Andrea       | Professor of Evolutionary Biology                                      | University of Padova, Italy                                                                      | Italy                                                      |
| Pilecky, Matthias      | Biochemistry                                                           | Donau Universität Krems                                                                          | Austria                                                    |
| Pilia, Maura           | Astronomy, Postdoc                                                     | INAF - Cagliari Observatory                                                                      | Italy                                                      |
| Pilkington, Fred       | Programme Officer for Plant Conservation                               | Fauna and Flora International                                                                    | United Kingdom of Great Britain and Northern Ireland (the) |
| Pillai, Ajit           | Lecturer                                                               | University of Exeter                                                                             | United Kingdom of Great Britain and Northern Ireland (the) |
| Pillay, Thanusha       | MSc Med Student                                                        | University of the Witwatersrand, Johannesburg                                                    | South Africa                                               |
| Pilon, André Francisco | Associate Professor (Senior)                                           | University of São Paulo / International Academy of Science, Health & Ecology                     | Brazil                                                     |
| Pilotto, Francesca     | Postdoctoral researcher                                                | Umeå University                                                                                  | Sweden                                                     |
| Pilsl, Sebastian       | PhD student                                                            | LIMES Institut fuer Chemische Biologie & Chemische Genetik                                       | Germany                                                    |
| Pim, David             | Staff scientist, molecular virology                                    | International Centre for Genetic Engineering and Biotechnology                                   | Italy                                                      |
| Pimbert, Michel        | Professor and Director of Centre for Agroecology, Water and Resilience | Coventry University                                                                              | United Kingdom of Great Britain and Northern Ireland (the) |
| Pimenta, Janielly      | Farmacêutica                                                           | Universidade de Fortaleza                                                                        | Brazil                                                     |
| Pimentel, Edson        | Doctor                                                                 | State University of Campinas                                                                     | Brazil                                                     |
| Pimentel, Gumerindo    | Biologist                                                              | Instituto de Ciencias Médicas                                                                    | Panama                                                     |
| Piña, Carlos           | CONICET Researcher                                                     | CONICET and UADER                                                                                | Argentina                                                  |
| PINAUD, Silvain        | Postdoc Host-Parasite Interaction                                      | Wellcome Sanger Institute                                                                        | United Kingdom of Great Britain and Northern Ireland (the) |
| Pincebourde, Sylvain   | Researcher in organismal biology                                       | CNRS                                                                                             | France                                                     |
| Pine, Ronald           | Zoology                                                                | University of Kansas                                                                             | United States of America (the)                             |
| Pine, Samuel           | Bioanalysis and Immunogenicity                                         |                                                                                                  | Belgium                                                    |
| Pineda, Mari-Carmen    | Marine Scientist                                                       |                                                                                                  | Australia                                                  |

|                                |                                                    |                                                                        |                                                            |
|--------------------------------|----------------------------------------------------|------------------------------------------------------------------------|------------------------------------------------------------|
| Pinheiro, Diego                | Postdoctoral Scholar                               | University of California, Davis                                        | United States of America (the)                             |
| Pinheiro, Frederico            | PHD student                                        | ISCTE - Instituto Universitário de Lisboa                              | Portugal                                                   |
| Pinheiro Dutra Rulli, Mayra    | PhD candidate                                      | Lund University                                                        | Sweden                                                     |
| Pinho, Luiz Carlos             | Professor of Zoology                               | Universidade Federal de Santa Catarina                                 | Brazil                                                     |
| Pinkerton, Evelyn              | Professor, political ecology (anthropology)        | School of Resource & Environmental Management, Simon Fraser University | Canada                                                     |
| Pinna, Thomas                  | PhD student                                        | Sorbonne Université - UPMC                                             | France                                                     |
| Pinshow, Berry                 | Professor Emeritus - Physiological Ecology         | Ben-Gurion University of the Negev                                     | Israel                                                     |
| Pinto, Manuel                  | Full Professor / Communication Sciences            | Universidade do Minho, Communication Sciences Department, ICS          | Portugal                                                   |
| Pinto Figueroa, Eric Alejandro | Microbial Ecology / Soil Health                    | Terrabiom                                                              | Switzerland                                                |
| Pinto-Ledezma, Jesus           | Evolutionary ecology                               | Department of Ecology, Evolution and Behavior, University of Minnesota | United States of America (the)                             |
| Pinzner, Anika                 | PhD student/ Geoscience                            | University of Alaska Fairbanks                                         | Germany                                                    |
| Pinzon, Jaime                  | Research Scientist                                 | Natural Resources Canada - Canadian Forest Service                     | Canada                                                     |
| Pioz, Maryline                 | epidemiologist                                     | INRA                                                                   | France                                                     |
| Piquer, Jose                   | Geologist                                          | Universidad Austral de Chile                                           | Chile                                                      |
| Piraino, Stefano               | Chairman, Academic Board of Biology                | University of Salento                                                  | Italy                                                      |
| Pires, Mathias                 | Assistant Professor                                | Universidade Estadual de Campinas                                      | Brazil                                                     |
| Pires, Filipe                  | Astronomy                                          | Planetário do Porto, Centro Ciência Viva                               | Portugal                                                   |
| Pires do Prado, Livia          | PhD Student                                        | Museu Paraense Emílio Goeldi                                           | Brazil                                                     |
| Pirhadi, Negin                 | IMBRSEA Erasmus student                            | Ghent University                                                       | Iran (Islamic Republic of)                                 |
| Pirhofer Walzl, Karin          | Post Doc                                           | Freie Universität Berlin                                               | Germany                                                    |
| Pirog, Mirosław                | assistant professor                                | University of Silesia                                                  | Poland                                                     |
| Pischedda, Doris               | Postdoc in Neuroscience                            | Charité – Universitätsmedizin Berlin                                   | Germany                                                    |
| Piskowski, Rebecca             | Team Leader, Principle investigator                | Institute of Psychiatry and Neuroscience of Paris, INSERM UMR1266      | France                                                     |
| Pita, Miguel                   | Senior lecturer and researcher                     | Universidad Autónoma de Madrid                                         | Spain                                                      |
| Pitman, Nigel                  | Mellon Senior Conservation Ecologist               | Field Museum of Natural History                                        | United States of America (the)                             |
| Piton, Gabin                   | PhD in Ecology                                     | Laboratory of Alpine Ecology                                           | France                                                     |
| Pitre, Karolane                | Biologist                                          |                                                                        | Canada                                                     |
| Pittalis, Sophie               | Lecturer in Information and Communication Sciences | Université de Lille                                                    | France                                                     |
| Pitte, Pierre                  | Assistant researcher/Glaciology                    | IANIGLA-CONICET                                                        | Argentina                                                  |
| Pittermann, Jarmila            | Associate Professor/Plant Eco-physiology           | University of California, Santa Cruz                                   | United States of America (the)                             |
| Pittman, Simon                 | Researcher                                         | University of Plymouth                                                 | United Kingdom of Great Britain and Northern Ireland (the) |
| Piuz, André                    | Researcher - Geology & Paleontology                | Natural History Museum Geneva                                          | Switzerland                                                |
| Piwoz, Kasia                   | Aquatic Microbial Ecology                          | Institute of Microbiology, Czech Academy of Sciences                   | Czech Republic (the)                                       |
| Pizarro, Valeria               | Senior Research Associate                          | Cape Eleuthera Institute                                               | Bahamas (the)                                              |
| Pizo, Marco Aurelio            | professor                                          | São Paulo State University                                             | Brazil                                                     |
| Plachetka, Uwe-Christian       | agricultural anthropologist and risk researcher    |                                                                        | Austria                                                    |
| Placi, Sarah                   | Post-doc researcher in cognitive sciences          | German Primate Center - University of Göttingen                        | Germany                                                    |

|                        |                                                                     |                                                                         |                                                            |
|------------------------|---------------------------------------------------------------------|-------------------------------------------------------------------------|------------------------------------------------------------|
| plain, nicolas         | PhD Candidate                                                       | Institut des Géosciences de l' Environnement (IGE)                      | France                                                     |
| Plaisance, Laetitia    | tropical marine and terrestrial biodiversity                        | CNRS                                                                    | France                                                     |
| Planer, Katarina       | Professor                                                           | Hochschule Esslingen                                                    | Germany                                                    |
| Planillo, Aimara       | Postdoc                                                             | Leibniz Institute for Zoo and Wildlife Research                         | Germany                                                    |
| Plank, Michael         | Professor in Applied Mathematics                                    | University of Canterbury                                                | New Zealand                                                |
| Plantard, Olivier      | Senior Researcher                                                   | INRA                                                                    | France                                                     |
| Platenberg, Renata     | Wildlife Biologist                                                  | University of the Virgin Islands                                        | Virgin Islands (U.S.)                                      |
| Platts, Philip         | Research Fellow in Conservation Science                             | University of York                                                      | United Kingdom of Great Britain and Northern Ireland (the) |
| Plaza Pinto, Míriam    | Professor                                                           | Universidade Federal do Rio Grande do Norte                             | Brazil                                                     |
| pleguezuelos, juan m   | Full Professor                                                      | Granada University                                                      | Spain                                                      |
| Plieninger, Tobias     | Professor of Social-Ecological Interactions in Agricultural Systems | University of Göttingen and University of Kassel                        | Germany                                                    |
| Plischoff, Patricio    | Professor Institute of Geography and Department of Ecology          | Universidad Catolica de Chile                                           | Chile                                                      |
| Plóciennik, Mateusz    | assistant professor/palaeoclimatology, paleolimnology               | Department of Invertebrate Zoology and Hydrobiology, University of Lodz | Poland                                                     |
| Ploeger, Felix         | Prof. / Atmospheric Physics                                         | –                                                                       | Germany                                                    |
| plomion, christophe    | scientist                                                           | INRA                                                                    | France                                                     |
| Ploog, Peter           | Manager / Health care                                               |                                                                         | Germany                                                    |
| Plotz, Roan            | Lecturer in Environmental Science                                   | Victoria University                                                     | Australia                                                  |
| Plougonven, Riwal      | Professor                                                           | Ecole Polytechnique                                                     | France                                                     |
| Plutoni, Cedric        | Postdoctoral Fellow                                                 | University of Montréal - IRIC                                           | Canada                                                     |
| Poczai, Péter          | Associate Professor                                                 | University of Helsinki                                                  | Finland                                                    |
| Podadera, Diego        | PhD Student                                                         | University of Campinas/UNICAMP                                          | Brazil                                                     |
| Podger, Neil           | Agriculture - Poultry Production                                    | Retired - formerly Experimental Officer CSIRO Australia                 | Australia                                                  |
| Poesch, Mark           | Associate Professor                                                 | University of Alberta                                                   | Canada                                                     |
| POETA, MARIA LUANA     | Assistant Professor                                                 |                                                                         | Italy                                                      |
| Pogány, Ákos           | Researcher, Behavioural Ecology                                     | Department of Ethology, Eötvös Loránd University                        | Hungary                                                    |
| Pohlmann, Kirsten      | Ecology                                                             | Leibniz Institute for freshwater ecology and inland fisheries           | Germany                                                    |
| Pointecouteau, Etienne | Astrophysist                                                        | IRAP/CNRS                                                               | France                                                     |
| Pokrant, Bob           | Adjunct Professor of Anthropology                                   | Curtin University                                                       | Australia                                                  |
| Poland, Blake          | Associate Professor                                                 | University of Toronto                                                   | Canada                                                     |
| Polati, Flávia         | Physics Teacher                                                     | Universidade Federal do Rio Grande do Norte                             | Brazil                                                     |
| Polazzo, Francesco     | PhD student                                                         | IMDEA water institute                                                   | Spain                                                      |
| Polesello, Stefano     | Environmental Chemistry Researcher                                  | Water Research Institute-CNR                                            | Italy                                                      |
| Poletto, Davide        | International Consultant - Sustainable development governance       | UNESCO                                                                  | Italy                                                      |
| Poli, Anna             | Postdoc                                                             | Università of Torino                                                    | Italy                                                      |
| Polissi, Alessandra    | Microbiologist                                                      | University of Milano                                                    | Italy                                                      |

|                             |                                                                         |                                                                |                                                            |
|-----------------------------|-------------------------------------------------------------------------|----------------------------------------------------------------|------------------------------------------------------------|
| Politi, Natalia             | Researcher Conservation Biologist                                       | Instituto de Ecorregiones Andinas CONICET/UNJu                 | Argentina                                                  |
| Polizzi, Stefano            | Prof. Physical Chemistry                                                | Università Ca' Foscari Venezia                                 | Italy                                                      |
| Polk, Sarah                 | Graduate student, neuroscience                                          | Max Planck Institute for Human Development                     | Germany                                                    |
| Pollard, Chris              | Conservation Science                                                    | Forest Research                                                | United Kingdom of Great Britain and Northern Ireland (the) |
| Pollari, Maija              | postdoctoral researcher                                                 | University of Helsinki                                         | Finland                                                    |
| Pollok Narayanan, Andrea    | Dipl Physicist                                                          | Multifunctional Fairnction                                     | Germany                                                    |
| Pols, Auke                  | Lecturer Knowledge, Technology and Innovation                           | Wageningen University & Research                               | Netherlands (the)                                          |
| Poltronieri, Palmiro        | researcher in biology                                                   | National Research Council of Italy                             | Italy                                                      |
| Polvé, Mireille             | University Professor, Geochemistry                                      | Observatoire Midi-Pyrénées-CNRS-Université de Toulouse         | France                                                     |
| Pomeroy, Patrick            | senior scientist                                                        | University of St Andrews                                       | United Kingdom of Great Britain and Northern Ireland (the) |
| Pommerening, Florian        | Post-doctoral researcher                                                | University of Basel                                            | Switzerland                                                |
| Pompeu, Paulo               | Professor                                                               | University of Lavras                                           | Brazil                                                     |
| Ponce, Reina                | Administrador de Fauna Silvestre                                        | Instituto Veterinario y de ecología m                          | Mexico                                                     |
| Ponce Toledo, Rafael Isaac  | Evolutionary Biology                                                    | University of Vienna                                           | Austria                                                    |
| Ponge, Jean-François        | professor emeritus in soil ecology                                      | Muséum National d'Histoire Naturelle                           | France                                                     |
| Pons, Pere                  | Associate professor. Animal ecology and Conservation.                   | University of Girona                                           | Spain                                                      |
| Pons, Jean-Marc             | Assistant Professor, Biologist                                          | Museum National d'Histoire Naturelle                           | France                                                     |
| Pons Buades, Guillem Xavier | Professor UIB/Biogeography                                              | University of the Balearic Islands                             | Spain                                                      |
| Pontius, Jennifer           | Research Professor                                                      | University of Vermont                                          | United States of America (the)                             |
| Ponton, Jose                | PhD student in Bioscience Engineering                                   | Ghent University                                               | Ecuador                                                    |
| Ponton, Stephane            | Scientist                                                               | INRA                                                           | France                                                     |
| Ponton, Dominique           | Senior Research Officer                                                 | French National Research Institute for Sustainable Development | Madagascar                                                 |
| Pool, Monique               | Director, Environmental Activist                                        | Green Heritage Fund Suriname                                   | Suriname                                                   |
| Poorter, Hendrik            | Plant Ecophysiolgologist                                                | Forschungszentrum Jülich                                       | Germany                                                    |
| Pope, Lisa                  | PhD in Biology                                                          | The University of Queensland                                   | Australia                                                  |
| Popescu, Daniel             | Pharmacy                                                                |                                                                | Spain                                                      |
| Popoff, Nadège              | PhD                                                                     | Irstea                                                         | France                                                     |
| Popov, Todor                | professor                                                               | University Hospital Sv. Ivan Rilsmi                            | Bulgaria                                                   |
| Popova, Iskra               | Associated professor at the department for Computer and System Sciences | Stockholm University                                           | Sweden                                                     |
| Popovici, Dan               | Professor, Mathematics                                                  | Université Paul Sabatier, Toulouse                             | France                                                     |
| POPOVICI, Eduard-Cristian   | Assoc. Prof.                                                            | Politehnica University of Bucharest                            | Romania                                                    |
| Popovsky, Josiane           | Biologist                                                               |                                                                | France                                                     |
| Popp, Andrea                |                                                                         | ETH Zurich                                                     | Switzerland                                                |
| Popp, Sharon                | Anthropology                                                            | Retired                                                        | United States of America (the)                             |
| Poppe, Annika Elena         | Political Science                                                       | Peace Research Institute Frankfurt                             | Germany                                                    |

|                             |                                                                               |                                                                                     |                                                            |
|-----------------------------|-------------------------------------------------------------------------------|-------------------------------------------------------------------------------------|------------------------------------------------------------|
| Porcar Anento, Roger        | Research collaborator (Sustainability Science and Technologies)               | Universitat Politècnica de Catalunya                                                | Spain                                                      |
| Porcher, Emmanuelle         | Professor of Ecology                                                          | Muséum national d'Histoire naturelle                                                | France                                                     |
| Porfido, Joseph             | Chemist                                                                       |                                                                                     | United States of America (the)                             |
| Porras-Bernardez, Francisco | Lecturer/Researcher, Cartography                                              | TU Wien                                                                             | Austria                                                    |
| Porro, Roberto              | Researcher                                                                    | Embrapa                                                                             | Brazil                                                     |
| Porta, Miquel               | Professor of Preventive Medicine, Epidemiology & Public Health                | IMIM UAB PSMar PRBB                                                                 | Spain                                                      |
| Portabella, Marcos          | Senior Researcher                                                             | Spanish Research Council (CSIC)                                                     | Spain                                                      |
| portail, Marie              | Marine ecologist                                                              |                                                                                     | France                                                     |
| Portanier, Elodie           | Post doctoral / ecology                                                       | University Lyon 1                                                                   | France                                                     |
| Portas, Ruben               | Wildlife Researcher                                                           | Leibniz Institute for Zoo and Wildlife Research of Berlin                           | Namibia                                                    |
| Porter, Christine           | Associate Professor and Wyoming Excellence Chair in Community & Public Health | University of Wyoming                                                               | United States of America (the)                             |
| Portier, Christopher        | Environmental Health Research                                                 | Private                                                                             | Switzerland                                                |
| Portillo Estrada, Miguel    | Post-doc researcher in plant ecophysiology                                    | University of Antwerp                                                               | Belgium                                                    |
| Portoghese, Ivan            | Research Scientist                                                            | National Research Council                                                           | Italy                                                      |
| Portugal, Steve             | Reader in Animal Behaviour and Physiology                                     | Royal Holloway University of London                                                 | United Kingdom of Great Britain and Northern Ireland (the) |
| Posada, Zulay               | Biologa                                                                       | independiente                                                                       | Colombia                                                   |
| Pospech, Jola               | Assistant Professor in Organic Chemistry                                      | Leibniz Institute for Catalysis Rostock                                             | Germany                                                    |
| Post, Yanina                | Biologist                                                                     | Osnabrueck University                                                               | Germany                                                    |
| Post, David                 | Senior Hydrologist                                                            | CSIRO                                                                               | Australia                                                  |
| Postic, Sebastien           | Researcher - Taxation, Development, and Climate                               | Institute for Climate Economics                                                     | France                                                     |
| Postma, Johannes            | Seignior researcher plant biology, agronomy                                   | Forschungszentrum Juelich                                                           | Germany                                                    |
| Poteete, Amy                | Co-Director, Loyola Sustainability Research Centre/Political Science          | Concordia University                                                                | Canada                                                     |
| Potkamp, Gerrit             | PhD student, Evolutionary biology                                             | University of Groningen                                                             | Netherlands (the)                                          |
| Potter, Joei                | Assistant Professor                                                           | University College Dublin                                                           | Ireland                                                    |
| Potter, Kevin M.            | Research Associate Professor                                                  | Department of Forestry and Environmental Resources, North Carolina State University | United States of America (the)                             |
| Potter, Tamara              | TERN Field Assistant                                                          | University of Adelaide                                                              | Australia                                                  |
| Potter, Joanna              | Assistant professor - veterinary anaesthesia                                  | University college Dublin                                                           | Ireland                                                    |
| Potter, William             | Professor                                                                     | University of Tulsa                                                                 | United States of America (the)                             |
| Potterf, Maria              | Postdoctoral researcher                                                       | University of Jyväskylä                                                             | Finland                                                    |
| Potters, Hans               | Retired Physicist                                                             |                                                                                     | Netherlands (the)                                          |
| Potti, Jaime                | Senior researcher, Ecology                                                    | CSIC                                                                                | Spain                                                      |
| Potts MD, PhD, Malcolm      | Population, family planning, women's education                                | UC Berkeley                                                                         | United States of America (the)                             |
| Potvin, Catherine           | Professor                                                                     | McGill University                                                                   | Canada                                                     |
| Potvin, Dominique           | Lecturer (Assistant Professor), Animal Ecology                                | University of the Sunshine Coast                                                    | Australia                                                  |

|                            |                                                                           |                                                                           |                                                            |
|----------------------------|---------------------------------------------------------------------------|---------------------------------------------------------------------------|------------------------------------------------------------|
| Pou Álvarez, Núria         | Projects Officer at Biodiversity and Animal Conservation Lab              | Forest Sciences Centre of Catalonia                                       | Spain                                                      |
| Poujol, Marc               | University Associate Professor in Earth Sciences                          | University of Rennes                                                      | France                                                     |
| poulain, cedric            | scientist (fluid mechanics)                                               | CEA Grenoble,                                                             | France                                                     |
| Poulet, Lucie              | Postdoctoral Research Fellow                                              | NASA Kennedy Space Center                                                 | United States of America (the)                             |
| Poulin, Robert             | Professor of Zoology                                                      | University of Otago                                                       | New Zealand                                                |
| Poulsen, Anne              | Honorary Associate Professir                                              | The University of Queensland                                              | Australia                                                  |
| POUNOT, Kevin              | PhD Student                                                               | Institut Laue-Langevin                                                    | France                                                     |
| poupaud, mariline          | phd student in veterinary public health                                   | CIRAD & University of Liege                                               | Finland                                                    |
| Pourret, Olivier           | Associate Professor Biogeochemistry                                       | UniLaSalle                                                                | France                                                     |
| Pouteau, Robin             | Associate Professor                                                       | Taizhou University                                                        | China                                                      |
| Pouyet, Robin              | PhD student / Polymer chemist                                             | Université de Reims Champagne-Ardenne                                     | France                                                     |
| POVEDA, GERMAN             | FULL PROFESSOR - HYDROCLIMATOLOGY                                         | UNIVERSIDAD NACIONAL DE COLOMBIA AT MEDELLIN                              | Colombia                                                   |
| Powell, Samuel             | Postdoctoral Research Fellow                                              | The University of Queensland                                              | Australia                                                  |
| Powell, Roger A            | Professor Emeritus                                                        | North Carolina State University                                           | United States of America (the)                             |
| Powell, Amy                | Climate scienitst (sea ice), evolutionary biologist and software engineer | Sandia National Laboratories                                              | United States of America (the)                             |
| Power, Donovan             | Lead scientist at Power Economic Consulting/ Glaciologist/Geologist       | Power Economic Consulting (www.powereconconsulting.com)                   | United States of America (the)                             |
| Power, Thomas              | Professor Emeritus                                                        | Economics Univ. of Montana                                                | United States of America (the)                             |
| Powers, Breanna            | Post doctoral researcher                                                  | Boise State University                                                    | United States of America (the)                             |
| Poynter, Alexander         | Lecturer in Ecology and Conservation                                      | University of Cumbria                                                     | United Kingdom of Great Britain and Northern Ireland (the) |
| Pozsgai, Gabor             | Post-Doctoral Research Fellow/Ecology                                     | Fujian Agriculture and Forestry University                                | China                                                      |
| Prach, Karel               | Professor, Plant Ecology                                                  | Faculty of Science USB, Ceske Budejovice                                  | Czech Republic (the)                                       |
| Pradella, Fabienne         | Chair of Statistics & Econometrics                                        | Mainz University                                                          | Germany                                                    |
| Prado, Ivo                 | Freshwater fish researcher                                                | Universidade Federal de Lavras/Pisces - consultoria e serviços ambientais | Brazil                                                     |
| Prado, Jefferson           | Scientific Researcher - Botany                                            | Instituto de Botânica                                                     | Brazil                                                     |
| Prados, Ana                | Research Associate Professor /Atmospheric Chemistry                       | University of Maryland Baltimore County                                   | United States of America (the)                             |
| Prados, Emmanuel           | Researcher                                                                | INRIA                                                                     | France                                                     |
| Prang, Renee               | Senior scientist - Astrophysics                                           | Observatoire de Paris                                                     | France                                                     |
| Prantzos, Nikos            | Director of Research in French CNRS/Astrophysicist                        | Centre National pour la Recherche Scientifique                            | France                                                     |
| Prat Fornells, Narcís      | Professor Ecology                                                         | Universitat de Barcelona                                                  | Spain                                                      |
| Prates, Maria Paula        | Research Fellow                                                           | City, University of London                                                | United Kingdom of Great Britain and Northern Ireland (the) |
| Prato, Tony                | Professor Emeritus of Agricultural and Applied Economics                  | University of Missouri-Columbia                                           | United States of America (the)                             |
| Prats-Llinàs, Maria Teresa | PhD in agriculture                                                        |                                                                           | Spain                                                      |
| Pratt, Jessica             | Associate Professor- Ecology and Evolution                                |                                                                           | United States of America (the)                             |
| Predavec, Martin           | Ecologist                                                                 | Royal Zoological Society of New South Wales                               | Australia                                                  |

|                         |                                                        |                                                                             |                                                            |
|-------------------------|--------------------------------------------------------|-----------------------------------------------------------------------------|------------------------------------------------------------|
| Preece, Noel            | Adj. Assoc. Prof.                                      | James Cook University                                                       | Australia                                                  |
| Preece, Catherine       | Postdoc in ecology                                     | CREAF                                                                       | Spain                                                      |
| Preiser, Wolfgang       | Professor and Head: Division of Medical Virology       | Stellenbosch University                                                     | South Africa                                               |
| Preisner, Balint        |                                                        | MTA Centre for Ecological Research                                          | Hungary                                                    |
| Premchand, Brian        | Scientist/Neuroscience                                 |                                                                             | Singapore                                                  |
| Premier, Giuliano       | Emeritus Professor                                     | University of South Wales                                                   | United Kingdom of Great Britain and Northern Ireland (the) |
| Prendergast, Amy        | Senior Lecturer, School of Geography                   | University of Melbourne                                                     | Australia                                                  |
| Prendergast, Kit        | PhD, ecology                                           | Curtin University                                                           | Australia                                                  |
| Prendini, Lorenzo       | Curator and Professor                                  | American Museum of Natural History                                          | United States of America (the)                             |
| Prentice, Honor C.      | Professor/Biology                                      | Department of Biology, Lund University                                      | Sweden                                                     |
| Presley, Steven         | Postdoctoral Associate, Ecologist                      | University of Connecticut                                                   | United States of America (the)                             |
| Preston, Elizabeth      | PhD student Behavioural Ecology                        | University of Exeter                                                        | United Kingdom of Great Britain and Northern Ireland (the) |
| Preston, Joanne         | Principal Lecturer - Marine Biology                    | University of Portsmouth                                                    | United Kingdom of Great Britain and Northern Ireland (the) |
| Prestoz, César          |                                                        | Civil engineer                                                              | France                                                     |
| Previero, Marilia       | Biologist Research                                     | Fishery Institute of São Paulo State                                        | Brazil                                                     |
| Prevost, Genevieve      | University Professor in Insect Ecology                 | University of Picardie - Jules Verne                                        | France                                                     |
| PREVOST, Genevieve      | University Professor of Insect Ecology                 | University of Picardie - Jules Verne                                        | France                                                     |
| Price, Mary             | Professor of Biology, Emerita                          | University of California                                                    | United States of America (the)                             |
| Price, Catherine        | Postdoctoral Researcher                                | University of Sydney                                                        | Australia                                                  |
| Price, Cormac           | PhD candidate herpetology                              | University of KwaZulu-Natal                                                 | South Africa                                               |
| Price, Donald           | Professor of Biology                                   | University of Nevada, Las Vegas                                             | United States of America (the)                             |
| Price, Rebecca          | Professor                                              | University of Washington Bothell                                            | United States of America (the)                             |
| Price, Eluned           |                                                        | Durrell Wildlife Conservation Trust                                         | United Kingdom of Great Britain and Northern Ireland (the) |
| Price, Frank            | Retired Ecologist                                      | Utica College                                                               | United States of America (the)                             |
| Price, Karen            | Ecological consultant (PhD)                            | Self-employed                                                               | Canada                                                     |
| Price, Melissa          | Wildlife Management                                    | University of Hawaii at Manoa                                               | Zimbabwe                                                   |
| Priess, Joerg           | Senior scientist, environmental science                | Helmholtz Center for Environmental Research - UFZ                           | Germany                                                    |
| Priest, Neal            | Emergency Medicine Physician                           | St. Mary's Hospital, Athens, GA                                             | United States of America (the)                             |
| Prieto, Iván            | Postdoctoral researcher                                | Centro de Edafología y Biología Aplicada del Segura (CEBAS-CSIC)            | Spain                                                      |
| Prieto-Torres, David A. | Posdoctoral Researcher                                 | Universidad Nacional Autónoma de México                                     | Mexico                                                     |
| Pringels, Lentel        | PhD                                                    | KULeuven                                                                    | Belgium                                                    |
| Prinz, Rainer           | Glaciologist                                           | Department of Atmospheric and Cryospheric Sciences, University of Innsbruck | Austria                                                    |
| Priotto, José           | Investigador Principal CONICET, Profesor Asociado UNRC | ICBIA, , CONICET-UNRC                                                       | Argentina                                                  |
| Pritchett, Thomas       | Chemist                                                | Cedar Crest College                                                         | United States of America (the)                             |

|                             |                                                                      |                                                                                      |                                                            |
|-----------------------------|----------------------------------------------------------------------|--------------------------------------------------------------------------------------|------------------------------------------------------------|
| Priyadarshini, K V R        | Independent Researcher                                               |                                                                                      | Lao People's Democratic Republic (the)                     |
| Prodocimo, Viviane          | Comparative Physiology Professor                                     | Federal University of Paraná, Brazil                                                 | Brazil                                                     |
| Prodon, Roger               | emeritus, animal ecology                                             | Ecole Pratique des Hautes Etudes                                                     | France                                                     |
| Proença-Ferreira, António   | PhD Student                                                          | CIBIO-InBio / Universidade de Évora                                                  | Portugal                                                   |
| Proffitt, Geoffrey          | Professor applied ecology                                            | Swansea university                                                                   | United Kingdom of Great Britain and Northern Ireland (the) |
| Prokop, Zofia               | assistant professor, biology                                         | Jagiellonian Univewrsity in Krakow                                                   | Poland                                                     |
| Promberger, Markus          | Professor, head of department, sociology, labour and poverty studies | Institute for Employment Research (IAB), Nuremberg, and University of Erlangen (FAU) | Germany                                                    |
| Promponas, Vasilis          | Head, Bioinformatics Research Laboratory                             | Department of Biological Sciences, University of Cyprus                              | Cyprus                                                     |
| Prospathopoulos, Aristeidis | Associate Researcher                                                 | Hellenic Centre for Marine Research                                                  | Greece                                                     |
| Proust, Sébastien           | Scientist, Fluid Mechanics                                           | Irstea                                                                               | France                                                     |
| Pruegger, Valerie           | Adjunct Professor                                                    | University of Calgary                                                                | Canada                                                     |
| Psalti, Marina Natalia      | PhD student                                                          | Institute of Molecular and Evolutionary Biology                                      | Germany                                                    |
| Pseiridis, Anastasia        | Assistant Professor (tenured) of Microeconomics                      | Panteion University                                                                  | Greece                                                     |
| Puccinelli, Eleonora        | Postdoc                                                              | University of Cape Town                                                              | South Africa                                               |
| Puchi, Paulina              | PhD student Land Environment Resources and Health                    | University of Padova                                                                 | Italy                                                      |
| Puechmaille, Sebastien J.   | Associate Professor                                                  | ISEM, University of Montpellier                                                      | France                                                     |
| Puerta, Yarin               | Environmental engineer                                               | University of Antioquia                                                              | Colombia                                                   |
| Puértolas, Laura            | PhD Ecology & Env. Science                                           | ALBIREM                                                                              | Spain                                                      |
| Pugnaire, Francisco         | Ecologist                                                            | EEZA-CSIC                                                                            | Spain                                                      |
| Puig i Boix, Josep          | Retired university professor on energy                               | Autonomous University of Barcelona                                                   | Spain                                                      |
| Puig-Gironès, Roger         | Biodiversity researcher                                              | Universitat de Girona - Universitat de Barcelona                                     | Spain                                                      |
| Puillandre, Nicolas         | Assistant Professor in Evolutionary Biology                          | Muséum National d'Histoire Naturelle                                                 | France                                                     |
| Pujol, Benoit               | Researcher in evolutionary quantitative genetics                     | CNRS                                                                                 | France                                                     |
| Pulkkinen, Lauri            | PhD student, microbiology & structural biology                       | University of Helsinki                                                               | Finland                                                    |
| Pullen, Kirsten             | Director of Conservation and Education                               | Wild Planet Trust                                                                    | United Kingdom of Great Britain and Northern Ireland (the) |
| Puniamoorthy, Nalini        | Assistant professor                                                  | National university of Singapore                                                     | Singapore                                                  |
| Puotinen, Marji             | Geographer and coral reef scientist                                  | Australian Institute of Marine Science                                               | Australia                                                  |
| Pupim, Fabiano              | Professor/Geographer                                                 | Federal University of São Paulo                                                      | Brazil                                                     |
| Purdie, Gordon              | Biostatistician                                                      | University of Otago                                                                  | New Zealand                                                |
| Purhonen, Jenna             | Postdoctoral Researcher, Conservation science                        | University of Jyväskylä                                                              | Finland                                                    |
| Purohit, Divyadarshan       | Director,Scientist,Engineer                                          | Gurudev Observatory                                                                  | India                                                      |
| Purton, Chris               | retired; astronomy                                                   |                                                                                      | Canada                                                     |
| Purvis, Andy                | Research Leader and Individual Merit Researcher                      | The Natural History Museum, London                                                   | United Kingdom of Great Britain and Northern Ireland (the) |
| Pushkareva, Ekaterina       | Postdoctoral researcher                                              | University of Rostock                                                                | Germany                                                    |
| Pushpakaran, Prof Prem raj  | Professor & Scientist - BioTechnology                                | NITC                                                                                 | India                                                      |
| Püttker, Thomas             | Assistant Professor                                                  | Federal University of Sao Paulo                                                      | Brazil                                                     |

|                             |                                                                                  |                                                                                                                 |                                                            |
|-----------------------------|----------------------------------------------------------------------------------|-----------------------------------------------------------------------------------------------------------------|------------------------------------------------------------|
| Pütz, Peter                 | Statistician                                                                     | University of Göttingen                                                                                         | Germany                                                    |
| Pütz, Gerhard               | Senior Scientist Clinical Chemistry                                              | University Freiburg Medical Center                                                                              | Germany                                                    |
| Putzke, Jair                | Professor                                                                        | UNIPAMPA                                                                                                        | Brazil                                                     |
| Puyravaud, Jean-Philippe    | Ecologist                                                                        | Sigur Nature Trust                                                                                              | India                                                      |
| Pyke, Graham                | Adjunct Professor                                                                | Macquarie University                                                                                            | Australia                                                  |
| Pytker, Thomas              | Ecohydrologist                                                                   | Thompson Rivers University                                                                                      | Canada                                                     |
| Pyšek, Petr                 | researcher, ecologist                                                            | Institute of Botany, Czech Academy of Sciences & Faculty of Science, Charles University, Prague, Czech Republic | Czech Republic (the)                                       |
| Qi, Yueling                 | PhD student                                                                      | Wageningen University & Research                                                                                | Netherlands (the)                                          |
| Qilsaon, Mark               | Professor Emeritus                                                               | University of Alberta                                                                                           | Canada                                                     |
| Quadra, Gabrielle           | PhD student                                                                      | Federal University of Juiz de Fora                                                                              | Brazil                                                     |
| Quadri, Paulo               | Researcher and Consultant in Conesevation Science                                | UC Santa Cruz                                                                                                   | Mexico                                                     |
| Quagliarotti, Desirée A.L.  | Researcher, Environmental Economics                                              | National Research Council (CNR) - Institute for Studies on the Mediterranean (ISMed)                            | Italy                                                      |
| Quagliarotti, Desiree A.L.  | Researcher                                                                       | National Research Council - CNR                                                                                 | Italy                                                      |
| Quaglietta, Lorenzo         | Post-doc researcher                                                              |                                                                                                                 | Italy                                                      |
| Quaranta, Giuseppe          | responsible for photoelectronics research                                        | Scientia Group Italia                                                                                           | Italy                                                      |
| Quartermain, Evan           | Head of Programs / Ecologist                                                     | Humane Society International                                                                                    | Australia                                                  |
| quatrini, myriam            | maitre de conferences                                                            | AMU/CNRS                                                                                                        | France                                                     |
| Queenan, Kevin              | Veterinarian, One Health Researcher                                              | Royal Veterinary College, University of London                                                                  | United Kingdom of Great Britain and Northern Ireland (the) |
| Quéguiner, Bernard          | Professor                                                                        | Aix-Marseille University                                                                                        | France                                                     |
| Queiroga, Henrique          | Associate Professor, Marine Ecology                                              | University of Aveiro                                                                                            | Portugal                                                   |
| Queirolo, Diego             | Associate Professor of animal ecology                                            | Universidad de la República                                                                                     | Uruguay                                                    |
| Queiroz, Antonio            | Postdoc Fellow                                                                   | University of Lavras - UFLA                                                                                     | Brazil                                                     |
| Queiroz, Nuno               | Assistant researcher - marine ecology                                            | CIBIO / InBIO - Research Center in Biodiversity and Genetic Resources                                           | Portugal                                                   |
| Queiroz, Helder             | Researcher                                                                       | Instituto de Desenvolvimento Sustentável Mamirauá - IDS/OS-MCTIC                                                | Brazil                                                     |
| Queiroz A. Silva, Carolina  | Ph.D. Physics                                                                    | University of Sao Paulo                                                                                         | Brazil                                                     |
| Quéméré, Erwan              | Associate recherche in ecology                                                   | INRA                                                                                                            | France                                                     |
| Quennehen, Marine           | PHD                                                                              | INED                                                                                                            | France                                                     |
| Quentin, Yves               | Researcher                                                                       | CNRS                                                                                                            | France                                                     |
| Querejeta, José Ignacio     | Permanent Staff Scientist                                                        | National Research Council (Consejo Superior de Investigaciones Científicas_CSIC)                                | Spain                                                      |
| Quero, Grazia Marina        | Researcher in Microbial Ecology                                                  | Stazione Zoologica Anton Dohrn di Napoli                                                                        | Italy                                                      |
| Quero, Jose Luis            | Assistant Professor of Forestry                                                  | University of Cordoba                                                                                           | Spain                                                      |
| QUERO, Solène               | PhD student in pedology                                                          | CEREGE                                                                                                          | France                                                     |
| Quesada Avendaño, Florencia | University Researcher, Adjunct Professor, Latin American and Development Studies | University of Helsinki                                                                                          | Finland                                                    |
| Quetstroey, Manon           | Biodiversity conservation                                                        | Leibniz Institute for Zoo and Wildlife Research                                                                 | Germany                                                    |

|                              |                                                     |                                                     |                                                            |
|------------------------------|-----------------------------------------------------|-----------------------------------------------------|------------------------------------------------------------|
| Quevedo, Mario               | Senior lecturer; Ecology                            | Oviedo University                                   | Spain                                                      |
| Qui Minet, Zujaila           | Researcher                                          | Sorbonne University                                 | France                                                     |
| Quigley, Martin              | Executive Director, UCSC Arboretum & Botanic Garden | University of California, Santa Cruz                | United States of America (the)                             |
| Quigley, William             | Child and Family Behavioral Health                  | Dept of Health Hawaii [Retired]                     | United States of America (the)                             |
| Quinn, Andrew                | Postdoctoral Scientist, Cell Biology                | Universit   de Lausanne                             | Switzerland                                                |
| Quinn, John                  | Zoology                                             | University College Cork                             | Ireland                                                    |
| Qui  ones Gines, Laura       | Postgraduate studenr                                | Swansea university                                  | United Kingdom of Great Britain and Northern Ireland (the) |
| Quinson, Jonathan            | Researcher                                          | University of Copenhagen                            | Denmark                                                    |
| Quintana-Ascencio, Pedro     | Professor, Ecology                                  | University of Central Florida                       | United States of America (the)                             |
| Quintana-Cardona, Josep      | Paleontologist                                      | Institut Catala de paleontologia Miquel Crusafonnt  | Spain                                                      |
| Quintas Soriano, Cristina    | Postdoc                                             | Kassel University                                   | Germany                                                    |
| Quintela-Sabar  s, Celestino | PhD. Plant-Soil ecology                             |                                                     | Spain                                                      |
| Quintilhan, Manolo           | PhD student at IB/UNICAMP                           | UNICAMP                                             | Brazil                                                     |
| Quintin, Luc                 | Physiology, anesthesia-critical care                | Cnrs-university of lyon 1                           | France                                                     |
| Quirion, Philippe            | researcher, economics                               | CNRS                                                | France                                                     |
| Quirk, Julia                 | Biomedical Scientist, PhD                           | University of Iceland                               | Iceland                                                    |
| Quque, Martin                | PhD candidate in Zoology                            | CNRS - University of Strasbourg                     | France                                                     |
| R., Jorge                    | Researcher in Freshwater Ecosystems                 | Universitat de Lleida                               | Spain                                                      |
| R. Silva, Rogerio            | Researcher                                          | MPEG                                                | Brazil                                                     |
| Raab, Ted K.                 | Senior Investigator (Biogeochemistry)               | Carnegie Institution for Science                    | United States of America (the)                             |
| Rabaiotti, Daniella          | Researcher                                          | Zoological Society of London                        | United Kingdom of Great Britain and Northern Ireland (the) |
| Rabatel, Antoine             | Research Scientist, Glaciology                      | University of Grenoble Alpes                        | France                                                     |
| Rabbani, Khondkar            | Academic                                            | Independent University, Bangladesh                  | Bangladesh                                                 |
| Rabelo, Rafael               | PhD student/Ecology                                 | Instituto Nacional de Pesquisas da Amaz  nia        | Brazil                                                     |
| Rabie, Joseph                | Urban Studies                                       |                                                     | France                                                     |
| Rabier, Robin                | PhD Ecology                                         | Museum National d'Histoire Naturelle de Paris       | France                                                     |
| Rabier, Jacques              | Retired Associate Professor of plant Biology        | Mediterranean institute of biodiversity and ecology | France                                                     |
| Rabouille, Sophie            | Scientist, PhD in biological oceanography           | CNRS                                                | France                                                     |
| Raby, Graham                 | Post-Doctoral Researcher, Fish Ecology              |                                                     | Canada                                                     |
| Racimo, Fernando             | Assistant Professor of Population Genetics          | University of Copenhagen                            | Denmark                                                    |
| Racker, Juan                 | Researcher                                          | CONICET - Universidad Nacional de C  rdoba          | Argentina                                                  |
| Raczka, Marco                | Postdoctoral Researcher                             | University of Amsterdam                             | Netherlands (the)                                          |
| Radanovic, Milica            | PhD Candidate - biogeosciences                      | Washington State University                         | United States of America (the)                             |
| Radanovics, Sabine           | Meteorology                                         |                                                     | France                                                     |
| Radchuk, Viktoriia           | Post-Doc, Ecology                                   | Leibniz Institute for Zoo and Wildlife Research     | Germany                                                    |
| Raddi, Adriano               | Head of bioeconomy and governance program           | Forest Science and Technology Center of Catalonia   | Spain                                                      |
| Radenac, Gilles              | Assistant Professor                                 | UMR LIENSs - University of La Rochelle - CNRS       | France                                                     |

|                           |                                                                         |                                                                           |                                                            |
|---------------------------|-------------------------------------------------------------------------|---------------------------------------------------------------------------|------------------------------------------------------------|
| Radermacher, Nico         | PhD Student / Animal ecologist                                          | J.F. Blumenbach Institute, Georg- August University, Göttingen            | Germany                                                    |
| Radford, Lucy             |                                                                         | Sumatran Orangutan Society                                                | United Kingdom of Great Britain and Northern Ireland (the) |
| Radinger, Johannes        | PostDoc                                                                 | University of Girona                                                      | Spain                                                      |
| Radjenovic, Jelena        | Environmental engineer, Research Professor                              | Catalan Institute for Water Research                                      | Spain                                                      |
| Rädle, Viola              | Environmental Physicist                                                 | Heidelberg University                                                     | Germany                                                    |
| Radloff, Frans            | Senior Lecturer                                                         | Cape Peninsula University of Technology                                   | South Africa                                               |
| Radominska, Monika        | PhD student                                                             | IGB Berlin                                                                | Germany                                                    |
| Radosta, Elisa            | Scientist/Biology                                                       | Bioscope / University of Geneva                                           | Switzerland                                                |
| Radoux, Julien            | Research fellow - remote sensing                                        | Université catholique de Louvain                                          | Belgium                                                    |
| Radovic, Jagos            | Research Associate                                                      | University of Calgary                                                     | Canada                                                     |
| Radtke, Hans              | Ph.D Natural Resources Economics                                        | Independent Natural Resources Consultant                                  | United States of America (the)                             |
| Radujkovic, Dajana        | PhD student in Biology                                                  | University of Antwerp                                                     | Belgium                                                    |
| Radwan, Jacek             | Professor in evolutionary biology                                       | Adam Mickiewicz University in Poznan                                      | Poland                                                     |
| Radzki, Dominik           | Medicine                                                                | Medical University of Gdansk                                              | Poland                                                     |
| Raavel, Valerie           | Associate researcher                                                    | French Institute of Pondicherry                                           | France                                                     |
| Raeymaekers, Joost        | Professor                                                               | Nord University                                                           | Norway                                                     |
| Ráez-Luna, Ernesto        | Ecologist                                                               | Universidad Antonio Ruiz de Montoya                                       | Peru                                                       |
| Rafa, Miquel              | Director of Land and Environment                                        | Fundació Catalunya La Pedrera                                             | Spain                                                      |
| Rafacho, Alex             | Associate professor                                                     | Federal University of Santa Catarina                                      | Brazil                                                     |
| Rafie, Karim              | PhD in Structural Biology, Postdoctoral researcher in infection biology | Umeå University                                                           | Sweden                                                     |
| Ragavander, Nanta         | Master Organic Agriculture                                              | Wageningen University                                                     | India                                                      |
| Ragazzola, Federica       | Senior Lecturer in Marine Biology                                       | Institute of Marine Sciences, School of Biology, University of Portsmouth | United Kingdom of Great Britain and Northern Ireland (the) |
| Raguin, Gilles            | Médical doctor                                                          | IMEA                                                                      | France                                                     |
| Rahbé, Yvan               | Research Director. Plant Health Sciences                                | INRA                                                                      | France                                                     |
| Rahbek, Carsten           | Professor in Biodiversity                                               | <a href="https://macroecology.ku.dk/">https://macroecology.ku.dk/</a>     | Denmark                                                    |
| Rahman, Syed              | Forestry                                                                | The Center for International Forestry Research (CIFOR)                    | Indonesia                                                  |
| Rahman, Anisur            | Program Specialist                                                      | Ontario Ministry of the Environment, Conservation and Parks               | Canada                                                     |
| Rahman, Md. Habibur       | PhD student                                                             | Kyoto University                                                          | Japan                                                      |
| Rahmani, Mohammad Hussein | Professor assistant                                                     | Lorestan university                                                       | Iran (Islamic Republic of)                                 |
| Rai, Neha                 | PhD Student                                                             | University of Helsinki                                                    | Finland                                                    |
| Raicevich, Saša           | Researcher, Marine Ecology                                              | Istituto Superiore per la Protezione e la Ricerca Ambientale (ISPRA)      | Italy                                                      |
| Raimonet, Melanie         | Biogeochemistry                                                         | ECOLAB                                                                    | France                                                     |
| Raines, Adam John         | MS Environmental Science                                                | University of Idaho                                                       | United States of America (the)                             |
| Rainey, Paul              | Director, Department of Microbial Population Biology                    | Max-Planck Institute for Evolutionary Biology                             | Germany                                                    |
| Rainham, Daniel           | Associate Professor                                                     | Dalhousie University                                                      | Canada                                                     |

|                                |                                                    |                                                                   |                                |
|--------------------------------|----------------------------------------------------|-------------------------------------------------------------------|--------------------------------|
| Rainville, Stéphane            | Vision Scientist/Vision Science                    | VizirLabs Consulting                                              | Canada                         |
| Raisch, Kurt                   | Biochemistry                                       | Max-Planck-Institut für Biochemie                                 | Germany                        |
| Raj, Kiran                     | Assistant Professor in Botany                      | SN College Kollam                                                 | India                          |
| Raja, Mathankumar              | PhD Student in Physics & Applied Mathematics       | University of Navarra                                             | Spain                          |
| Rajaei, Hossein                | Curator of Lepidoptera collection                  | Staatliches Museum für Naturkunde Stuttgart                       | Germany                        |
| Rajkaran, Anusha               | Senior Lecturer / Estuarine Ecology                | University of the Western Cape                                    | South Africa                   |
| Rakes, Patrick                 | Ichthyologist                                      | Conservation Fisheries, Inc.                                      | United States of America (the) |
| Rakosy, Laszlo                 | Prof. Head of the Departmentn Taxonomy and Ecology | Babes-Bolyai University, Cluj, Romania                            | Romania                        |
| Rakowski, Chase                | PhD Candidate, Ecology                             | University of Texas at Austin                                     | United States of America (the) |
| Rakowski, Joseph               | Associate Professor, Oncology                      | Wayne State University School of Medicine, Detroit, MI            | United States of America (the) |
| Ralko, Arnaud                  | Associate professor in theoretical physics         | University Grenoble Alpes                                         | France                         |
| RAMADE, François               | Emeritus Professor of Ecology                      | University of Paris Sud                                           | France                         |
| Ramahavelo, Jean Luc           | Fisheries Programme Support Technician             |                                                                   | Madagascar                     |
| Ramalho, Emiliano              | Technical Scientific Director                      | Mamirauá Sustainable Development Institute                        | Brazil                         |
| Raman, Vanitha                 | Immunologist                                       |                                                                   | United States of America (the) |
| Ramaswamy, Jagannathan         | Retired Professor of Physics                       | The Institute of Mathematical Sciences, Chennai, India            | India                          |
| Ramaswamy, Ram                 | Visiting Professor, Chemistry                      | IIT Delhi                                                         | India                          |
| Ramnaud, Maëlle                | Informatic manager                                 | National Museum of Natural History                                | France                         |
| Ramirez, Octavio               | Director, Biochemical Engineer                     | Biotechnology Institute, National Autonomous University of Mexico | Mexico                         |
| Ramirez, Claudio               | Associate Professor                                | Universidad de Talca                                              | Chile                          |
| Ramirez, Jorge                 | Professor/Hydrologic Science                       | Colorado State university                                         | United States of America (the) |
| Ramirez, Jorge A               | Professor/Hydrologic Science                       | Colorado State University                                         | United States of America (the) |
| Ramírez, Miguel Ángel          | Scientific research                                | INIA                                                              | Spain                          |
| Ramírez, Ana Cristina          | Professor                                          | Universidad Michoacana de San Nicolás de Hudalgi                  | Mexico                         |
| Ramirez Prado, Juan Sebastian  | postdoctoral fellow                                | KU Leuven                                                         | Belgium                        |
| Ramirez-Macias, Deni           | Whale Shark Mexico Director / sharks and rays      | Whale Shark Mexico                                                | Mexico                         |
| Ramirez-Sanchez, Marcia        | Biology                                            | Universidad nacional autónoma de México                           | Mexico                         |
| Ramirez-Zierold, Jorge Alberto | Junior Researcher                                  | Institute for Marine Science and limnology                        | Mexico                         |
| Ramón, Giovanni                | Professor / Biology                                | Universidad San Francisco de Quito                                | Ecuador                        |
| Ramos, Rita                    | Research fellow                                    | InBIO - CIBIO                                                     | Portugal                       |
| Ramos, Xavier                  | Professor of Economics                             | Universitat Autonoma Barcelona                                    | Spain                          |
| Ramos, Daniel                  | Ph.D student in Biology                            | J.F. Blumenbach Institute of Zoology and Anthropology             | Germany                        |
| RAMOS, SERGIO                  | PHD                                                | UNIVERSITY OF ZURICH                                              | Switzerland                    |
| RAMOS, CARLOS HENRIQUE         | Professor                                          | UNICAMP                                                           | Brazil                         |
| RAMOS, ELOISA                  | Associate Professor of Ecology                     | University of Granada                                             | Spain                          |
| Ramos-Esplá, Alfonso A.        | Senior Professor Zoology                           | University of Alicante                                            | Spain                          |
| Rampasek, László               | CEO / Engineer                                     | OurOffset Nonprofit llc.                                          | Hungary                        |

|                         |                                               |                                                                            |                                                            |
|-------------------------|-----------------------------------------------|----------------------------------------------------------------------------|------------------------------------------------------------|
| Ramsayer, Johan         | Evolution and Ecology                         |                                                                            | France                                                     |
| Ramsden, David          | Head of Conservation                          | Barn Owl Trust                                                             | United Kingdom of Great Britain and Northern Ireland (the) |
| Randall, Jan            | Professor Emerita of Biology                  | San Francisco State University                                             | United States of America (the)                             |
| Randi, Ettore           | Professor, Conservation Biology               | University of Bologna                                                      | Italy                                                      |
| Randi, Marco            | Professor - Cellular Biology                  | Federal University of Paraná                                               | Brazil                                                     |
| Rangel, Rodrigo         | PhD student in Permafrost Geophysics          | University of Wyoming                                                      | Brazil                                                     |
| Ranits, Christian       | Master Student                                | University of Vienna                                                       | Austria                                                    |
| Ranker, Tom             | Professor Emeritus                            | University of Hawaii at Manoa                                              | United States of America (the)                             |
| Rannap, Riinu           | researcher                                    | University of Tartu                                                        | Estonia                                                    |
| Ranson, William         | Professor of Geoscience                       | Furman University                                                          | United States of America (the)                             |
| Rao, sathyanarayan      | PhD student                                   | UCLouvain                                                                  | India                                                      |
| Rapaport, Hannah        | PhD candidate (cognitive neuroscience)        | Macquarie University                                                       | Australia                                                  |
| Rapp, Josephine         | PhD in Arctic Marine Microbiology             | University of Washington                                                   | Germany                                                    |
| Raskin, Paul            | President/physicist                           | Tellus Institute                                                           | United States of America (the)                             |
| Rassool, Bertrand       | Economist / Consultant                        | EcoWatt Company Limited                                                    | Seychelles                                                 |
| Rastogi, Anshu          | Associate professor                           | Poznan University of Life Sciences                                         | Poland                                                     |
| Ratay, Sarah            | M.S. Ecology                                  | UCLA                                                                       | United States of America (the)                             |
| Ratcliffe, Brett        |                                               | University of Nebraska                                                     | United States of America (the)                             |
| ratet, pascal           | Research director                             | CNRS                                                                       | France                                                     |
| Rathgeber, Cyrille      | Researcher Forest Ecology                     | INRA                                                                       | France                                                     |
| Rathnayake, Kaushalya   | Assistant Lecturar/demonstrator - Biology     | Rajarata University                                                        | Sri Lanka                                                  |
| rathore, ishan          | Researcher                                    | IIT-Bombay                                                                 | India                                                      |
| Ratier Backes, Amanda   | Ecology                                       |                                                                            | Brazil                                                     |
| Ratti, John             | Research Sci3ntist and Orofessor, Retired     | University of Idaho                                                        | United States of America (the)                             |
| Rattner, Amir           |                                               | Johns Hopkins University                                                   | United States of America (the)                             |
| Ratzbor, Ronja          | PhD Student                                   | University of Tuebingen                                                    | Germany                                                    |
| Rau, E-Ping             | PhD student                                   | University of Toulouse 3                                                   | France                                                     |
| Rau, Jaime R.           | Full Professor/Ecologist                      | Universidad de Los Lagos                                                   | Chile                                                      |
| Rau, Gabriel            | Assistant Professor                           | Karlsruhe Institute of Technology                                          | Germany                                                    |
| Raupp, Jamie            | Fisheries and Wildlife - Conservation biology | Michigan State University                                                  | United States of America (the)                             |
| Rausch, Sebastian       | Professor, Energy and Environmental Economics |                                                                            | Switzerland                                                |
| Rausing, Lisbet         | Science Historian                             |                                                                            | United Kingdom of Great Britain and Northern Ireland (the) |
| Raven, Nynke            | Molecular ecology                             | Deakin University                                                          | Australia                                                  |
| Ravetto Enri, Simone    | PhD, Rangeland Ecology and Management         | University of Torino, Department of Agricultural, Forest and Food Sciences | Italy                                                      |
| Ravichandran, Ramanibai | Former Professor and Head Dept of Zoology     | University of Madras Chennai                                               | India                                                      |
| Raw, Anthony            | Professor                                     | Universidade estadual de Santa Cruz, ilhéus                                | Brazil                                                     |
| Rawson, Andrew          | Adjunct Associate Professor                   | Charles Sturt University                                                   | Australia                                                  |
| Ray Sarkar, Sneha       | PhD Student                                   | University of Copenhagen                                                   | Denmark                                                    |

|                               |                                                                 |                                                             |                                                            |
|-------------------------------|-----------------------------------------------------------------|-------------------------------------------------------------|------------------------------------------------------------|
| Raymundo, Laurie              | Professor, Marine Ecology                                       | University of Guam Marine Laboratory                        | Guam                                                       |
| Rayne, Aisling                |                                                                 | University of Canterbury                                    | New Zealand                                                |
| Raynolds, Martha              | Researcher - Arctic vegetation                                  | University of Alaska Fairbanks                              | United States of America (the)                             |
| Rayo, Enrique                 | PhD student                                                     | University of Zürich                                        | Switzerland                                                |
| Razgour, Orly                 | Lecturer in Ecology                                             | University of Southampton                                   | United Kingdom of Great Britain and Northern Ireland (the) |
| Re, Barbara                   | PostDoc in Applied Mathematics                                  | University of Zurich                                        | Switzerland                                                |
| Reading, Richard              | Director of Research and Conservation                           | Butterfly Pavilion                                          | United States of America (the)                             |
| Reardon, James                | Scientist: herpetology, invasive species ecology and management | Department of Conservation                                  | New Zealand                                                |
| Reay, Dave                    | Professor of Carbon Management                                  | University of Edinburgh                                     | United Kingdom of Great Britain and Northern Ireland (the) |
| Rebeillard, Florian           | Neuroscience PhD                                                | Inserm                                                      | France                                                     |
| Rebelo, Maria Teresa          | Assistant Professor / Integrated Pest Management                | FCUL                                                        | Portugal                                                   |
| Rebelo, Rui                   | Professor                                                       | Faculty of Sciences University of Lisbon                    | Portugal                                                   |
| Rebelo, Anthony               | Conservation Biologist                                          | South African National Biodiversity Institute               | South Africa                                               |
| Rebelo, Alanna                | Postdoctoral Researcher                                         | Stellenbosch University                                     | South Africa                                               |
| Reboa, Anna                   |                                                                 | University of Genoa                                         | Italy                                                      |
| Reboleira, Ana Sofia          | Associate Professor                                             | Natural History Museum of Denmark, University of Copenhagen | Denmark                                                    |
| Rebollo-Hernanz, Miguel       | PhD student in Food Chemistry                                   | Universidad Autónoma de Madrid                              | Spain                                                      |
| Rebstock, Ginger              | Research Scientist, marine ecology                              | University of Washington                                    | United States of America (the)                             |
| Recalde-Salas, Angela         | Quantitative ecologist                                          | Curtin University                                           | Australia                                                  |
| Recchia, Francesco            | Researcher, nuclear physics                                     | Univrsy of Padova                                           | Italy                                                      |
| Recco-Pimentel, Shirlei Maria | Professor                                                       | Universidade Estadual de Campinas, São Paulo                | Brazil                                                     |
| receveur, auore               | PhD sutdent                                                     | IRD & SPC                                                   | New Caledonia                                              |
| Rech, Andre Rodrigo           | Professor of Ecology                                            | Universidade Federal dos Vales do Jequitinhonha e Mucuri    | Brazil                                                     |
| Reche, Isabel                 | Professor of Ecology                                            | Universidad de Granada                                      | Spain                                                      |
| Recher, Harry                 | Senior Fellow                                                   | The Australian Museum                                       | Australia                                                  |
| Rechisky, Erin                | Research Scientist                                              | Kintama Research Services                                   | Canada                                                     |
| Reczynska, Kamila             | Vegetation Ecology                                              | University of Wroclaw                                       | Poland                                                     |
| Redden, George                | retired, environmental science and engineering                  | Montana State University                                    | United States of America (the)                             |
| Reddy, Lashantha              | Science Education                                               | Curro Aurora                                                | South Africa                                               |
| Redlich, Sarah                | Postdoc, Agricultural Ecology                                   | University of Wuerzburg                                     | Germany                                                    |
| Redmond, Ian                  | Ambassador                                                      | UN Convention on Migratory Species                          | United Kingdom of Great Britain and Northern Ireland (the) |
| Redondo, Tomas                | Researcher Behavioural Ecology                                  | Estacion Biologica de Doñana, CSIC                          | Spain                                                      |
| Redü, Darlan Rutz             | Phd Candidate                                                   | Universidade de São Paulo (USP)                             | Brazil                                                     |
| Reed, David                   | Curator of Mammals                                              | University of Florida                                       | United States of America (the)                             |
| Reed, James                   | Scientist                                                       | Center for International Forestry Research                  | Indonesia                                                  |
| Reed, Thomas                  | Senior Lecturer in Zoology                                      | University College Cork                                     | Ireland                                                    |

|                                 |                                                                      |                                                                   |                                |
|---------------------------------|----------------------------------------------------------------------|-------------------------------------------------------------------|--------------------------------|
| Reemer, Menno                   | Entomologist                                                         | Naturalis Biodiversity Center                                     | Netherlands (the)              |
| Reepmeyer, Christian            | Senior Lecturer                                                      | James Cook University                                             | Australia                      |
| Rees, Jean-Francois             | Professor                                                            | University of Louvain                                             | Belgium                        |
| Rees, William                   | Professor emeritus, ecological economics and human ecology           | University of British Columbia                                    | Canada                         |
| Rees, David                     | Senior Engineer, Marine Biodiversity                                 | University of Bergen                                              | Norway                         |
| Rees, Peter                     | Atmospheric researcher                                               | RMIT                                                              | Australia                      |
| Rees, Jasper                    | Senior Advisor: Bioeconomy                                           | Independent                                                       | South Africa                   |
| Refoyo Martínez, Alba           | PhD                                                                  | Globe institute. Geogenetics                                      | Denmark                        |
| Refrégier, Guislaine            | Ass. Prof                                                            | Univ. Paris-Sud                                                   | France                         |
| Regalado Fernandez, Omar Rafael | PhD Earth Sciences                                                   | University College London                                         | Mexico                         |
| Regard, Vincent                 | Earth Sciences - Lecturer                                            | Université de Toulouse                                            | France                         |
| REGNARD, Jean-Luc               | Professor (emeritus)                                                 | Montpellier SupAgro                                               | France                         |
| Regts, Guus                     | Mathematician                                                        | University of Amsterdam                                           | Netherlands (the)              |
| Regula, Lis                     | Lecturer                                                             | University of Dayton                                              | United States of America (the) |
| Reguzzoni, Marcella             | university researcher                                                | University of Insubria                                            | Italy                          |
| Rehbein Lucero, José Andres     | Research Assistant                                                   | The University of Queensland                                      | Australia                      |
| Rehm, Eric                      | Senior Research Associate                                            | Université Laval                                                  | Canada                         |
| Rehman, Attiq ur                | Student at Erasmus Mundus Master Program in Plant Breeding (emPLANT) | The University of Helsinki                                        | Finland                        |
| Rehren, Oliver                  | Researcher in Psychology and Mediapsychology                         | Institution for Media Research, University of Technology Chemnitz | Germany                        |
| Rehren, Jennifer                | Postdoctoral Researcher                                              | Agrocampus Ouest                                                  | France                         |
| Reichard, Ulrich                | Professor for Anthropology                                           | Southern Illinois University Carbondale                           | United States of America (the) |
| Reiche, Johannes                | Assistant Professor                                                  | Wageningen University                                             | Netherlands (the)              |
| Reiche, Johannes                | Assistant Professor                                                  | Wageningen University                                             | Netherlands (the)              |
| Reichhart, Jean-Marc            | Emeritus Professor of Developmental Biology                          | University of Strasbourg                                          | France                         |
| Reid, Lee                       | Post-doctoral Research Fellow, Neuroscience                          |                                                                   | Australia                      |
| Reid, Carolyn                   | Environmental Specialist                                             | Trent University                                                  | Canada                         |
| Reid, J. Leighton               | Restoration Ecologist                                                | Missouri Botanical Garden                                         | United States of America (the) |
| Reid, Robin                     | Professor                                                            | Colorado State University                                         | United States of America (the) |
| Reid, Kimberley                 | PhD Researcher - Rainfall Extremes                                   |                                                                   | Australia                      |
| Reidsma, Pytrik                 | Associate Professor Plant Production Systems                         | Wageningen University                                             | Netherlands (the)              |
| Reijerd, Bas                    | Chemistry                                                            | Utrecht University                                                | Netherlands (the)              |
| Reijnders, Mirjam               | PhD student                                                          | Vrije Universiteit Amsterdam                                      | Netherlands (the)              |
| Reimer, James                   | Associate Professor                                                  | University of the Ryukyus                                         | Japan                          |
| Reimer, Tormey                  | PhD Candidate, Ecological Modelling                                  | University of Tasmania                                            | Australia                      |
| Reina, Orlando                  | Licenciado en Administración de la Fauna Silvestre                   | Instituto Veterinario y de Ecología                               | Mexico                         |
| Reinacher, Kai                  | Plant Science                                                        | Institut of Organic Agriculture (FiBL)                            | Switzerland                    |
| Reineke, Annette                | Professor Agriculture                                                | Geisenheim University                                             | Germany                        |

|                                  |                                                                                                     |                                                                                                    |                                                            |
|----------------------------------|-----------------------------------------------------------------------------------------------------|----------------------------------------------------------------------------------------------------|------------------------------------------------------------|
| Reinhardt, Liam                  | Lecturer in environmental science                                                                   | University of Exeter                                                                               | United Kingdom of Great Britain and Northern Ireland (the) |
| Reis, Roberto                    | Full Professor                                                                                      | Pontificia Universidade Católica do Rio Grande do Sul                                              | Brazil                                                     |
| Reisinger, Ryan                  | Postdoctoral fellow, Ecology                                                                        | CEBC, UMR 7372 du CNRS-Université de La Rochelle                                                   | France                                                     |
| Reither, Jack                    | BForSci (Hons), DNA transfer in a casework context                                                  | Deakin University                                                                                  | Australia                                                  |
| Reitsma, Leonard                 | Professor of Ecology                                                                                | Plymouth State University                                                                          | United States of America (the)                             |
| REJAUD, Alexandre                | PhD student in evolutionary biology                                                                 | University Toulouse III Paul Sabatier                                                              | France                                                     |
| Rejmankova, Eliska               | Professor                                                                                           | University of California Davis                                                                     | United States of America (the)                             |
| Rekker, Saphira                  | Dr                                                                                                  | University of Queensland                                                                           | Australia                                                  |
| Relton, Clare                    | Health                                                                                              | Queen Mary University of London                                                                    | United Kingdom of Great Britain and Northern Ireland (the) |
| Remans, Kim                      | Head of Protein Expression and Purification Core Facility                                           | EMBL                                                                                               | Germany                                                    |
| Remelgado, Ruben                 | Macroecology                                                                                        | German Centre for Integrative Biodiversity Research (iDiv)                                         | Germany                                                    |
| Remenak, Brad                    | Engineer                                                                                            |                                                                                                    | United States of America (the)                             |
| Rementilla, Gpw Bernard Bautista | Founder/Chairman/CEO. Climate Change Engg Scientist: MEPS-CMS Project (NRE & Facilities) CONSULTANT | World Center for Ocean Power and Energy Research & Green Technology Development Inc (WC-OPER-GTDI) | Philippines (the)                                          |
| Remigy, Jean-Christophe          | Professor, Chemical Engineering                                                                     | Laboratoire de Génie Chimique, Université Paul Sabatier                                            | France                                                     |
| Remke, Eva                       | Senior scientist - landscape ecology                                                                | B-WARE                                                                                             | Netherlands (the)                                          |
| Remm, Liina                      | Research fellow                                                                                     | University of Tartu                                                                                | Estonia                                                    |
| Remus-Emsermann, Mitja           | Microbiologist                                                                                      | School of Biological Sciences, University of Canterbury                                            | New Zealand                                                |
| Remy, Denise                     | Professor of Surgery and Ethics                                                                     | VetAgro Sup                                                                                        | France                                                     |
| Renart, Jaime                    | Molecular biologist. Retired                                                                        |                                                                                                    | Spain                                                      |
| Renaudin, Jean-Pierre            | Professor of biology                                                                                | University of Bordeaux                                                                             | France                                                     |
| Rendell, Luke                    | Reader in Biology                                                                                   | University of St Andrews                                                                           | United Kingdom of Great Britain and Northern Ireland (the) |
| RENDON RESTREPO, Steven          | PhD student in Astrophysics                                                                         | Laboratoire d'Astrophysique de Marseille - Aix-Marseille-Université                                | France                                                     |
| Renn, Ortwin                     | Scientific Director                                                                                 | Institute of Advanced Sustainability Studies                                                       | Germany                                                    |
| Renne, Dr. Ian J.                | Associate Professor of Ecology                                                                      | Youngstown State University                                                                        | United States of America (the)                             |
| Renner, Kathrin                  | Geoscientist                                                                                        | Eurac Research                                                                                     | Italy                                                      |
| Rennó Braga, Raul                | Ph. D. / Ecology and Conservation                                                                   | Universidade Federal do Paraná                                                                     | Brazil                                                     |
| Renoud, Julie                    | PhD                                                                                                 | IRSAMC-Université Paul Sabatier                                                                    | France                                                     |
| Renouf, Jean S.                  | Lecturer, Politics and International Relations                                                      | Southern Cross University                                                                          | Australia                                                  |
| Renwick, Katherine               | Ecologist                                                                                           | Montana State University                                                                           | United States of America (the)                             |
| Renwick, James                   | Professor of Physical Geography & Climate Science                                                   | Victoria University of Wellington                                                                  | New Zealand                                                |
| Reponen, Tuulia                  | PhD student in human geography                                                                      | University of Eastern Finland                                                                      | Finland                                                    |
| Reppucci, Juan                   | Researcher                                                                                          | CONICET                                                                                            | Argentina                                                  |

|                              |                                                              |                                                                                      |                                                            |
|------------------------------|--------------------------------------------------------------|--------------------------------------------------------------------------------------|------------------------------------------------------------|
| Requena Suarez, Daniela      | PhD Candidate                                                | Wageningen University and Reserach                                                   | Netherlands (the)                                          |
| Requena-Mullor, Juan Miguel  | Post Doctoral Research Associate                             | Boise State University                                                               | United States of America (the)                             |
| Reques, Ricardo              | Profesor Sustituto Interino                                  | Área de Ecología. Universidad de Córdoba                                             | Spain                                                      |
| Requier, Fabrice             | Postdoctoral Research Associate                              | University of Würzburg                                                               | Germany                                                    |
| Resende, Pedro               | Associate Professor of Mathematics                           | Instituto Superior Tecnico, Univ. Lisboa                                             | Portugal                                                   |
| Resende, Fernando            | Postdoc in Ecology                                           | Universidade Federal de Minas gerais                                                 | Brazil                                                     |
| Resende, Angélica            | PhD in Botany                                                | National Institute of Amazonian Research                                             | Brazil                                                     |
| Ressouche, Eric              | Physics                                                      | CEA Grenoble                                                                         | France                                                     |
| Rest, Armin                  | Associate Astronomer with Tenure                             | STScI                                                                                | United States of America (the)                             |
| Restrepo González, Alejandro | PhD student in Ecology and Conservation                      | Federal University of Paraná                                                         | Brazil                                                     |
| Restrepo Sáenz, Claudia      | Consultant                                                   | Independent                                                                          | Colombia                                                   |
| Restrepo-Tarquino, Inés      | Investigadora                                                | Instituto Cinara/Universidad del Valle                                               | Colombia                                                   |
| Retailleau, Aude             | Post-doctorant in Neuroscience                               |                                                                                      | France                                                     |
| Retelle, Michael             | Professor of Geology_Quaternary Geology and Paleoclimatology | Bates College and University Centre in Svalbard                                      | United States of America (the)                             |
| Retter, Alice                | PhD                                                          | University of Vienna                                                                 | Austria                                                    |
| Reul, Andreas                | Profesor Titular de UNiversidad                              | Universidad de Málaga                                                                | Spain                                                      |
| Reuland, Andreas             | Ophthalmology                                                |                                                                                      | Germany                                                    |
| Reusche, Gary                | Professor, Agricultural Science and Agribusiness Expert      | World Bank group IFC                                                                 | Ukraine                                                    |
| Revers, Frederic             | Scientist                                                    | INRA                                                                                 | France                                                     |
| Reverté Saiz, Sara           | Researcher                                                   |                                                                                      | Spain                                                      |
| Revilla, Eloy                | Investigador científico                                      | Estacion Biologica de Doñana CSIC                                                    | Spain                                                      |
| Revillion, Jean Philippe     | Professor                                                    | Federal University of Rio Grande do Sul                                              | Brazil                                                     |
| Revuelto, Jesús              | Postdoctoral researcher                                      | Pyrenean Institute of Ecology (IPE-CSIC)                                             | Spain                                                      |
| Rexin, Daniel                | Post-Doc                                                     | MPI for Evolutionary Biology                                                         | Germany                                                    |
| Rey, Pierre-Louis            | Assistant professor/PhD                                      | Idyst, UNIL                                                                          | France                                                     |
| Rey, Olivier                 | Assistant professor                                          | Université de Perpignan Via Domitia                                                  | France                                                     |
| Reyes, Rene                  | Researcher in Forest Economy (Ph.D.)                         | Instituto Forestal                                                                   | Chile                                                      |
| Reyes, Alejandra             | Sustainability                                               | UNAM                                                                                 | Mexico                                                     |
| Reyes-García, Victoria       | ICREA Research Professor (Anthropology)                      | Institute of Environmental Science and Technology, Universitat Autònoma de Barcelona | Spain                                                      |
| Reyes-Puig, Carolina         | Professor                                                    | Universidad San Francisco de Quito                                                   | Ecuador                                                    |
| Reynaert, Simon              | PhD Candidate                                                | University of Antwerp                                                                | Belgium                                                    |
| Reynaud, Enrique             | Professor                                                    | Instituto de Biotecnología, Universidad Nacional Autónoma de México                  | Mexico                                                     |
| Reynolds, John               | Managing Director and Glacial Hazard Specialist              | Reynolds International Ltd                                                           | United Kingdom of Great Britain and Northern Ireland (the) |
| Reynolds, Jessie             | Master's Candidate - Biology and aquatic ecotoxicology       | Queen's University                                                                   | Canada                                                     |
| Reynolds, Heather            | Associate Professor, Biology                                 | Indiana University                                                                   | United States of America (the)                             |
| Reynolds, Barbara            | Professor of Environmental Studies, retired                  | UNCAsheville                                                                         | United States of America (the)                             |

|                                |                                          |                                                                  |                                                            |
|--------------------------------|------------------------------------------|------------------------------------------------------------------|------------------------------------------------------------|
| Reynolds, Samantha             | PhD Candidate                            | The University of Queensland                                     | Australia                                                  |
| Rezende, Felipe                | MSc in Ecology                           | State University of Campinas (UNICAMP)                           | Brazil                                                     |
| Rezende, Andréia               | Professor                                | Universidade Estadual Paulista (UNESP)                           | Brazil                                                     |
| Rhea, Tina                     | MS Wildlife Biology                      |                                                                  | United States of America (the)                             |
| Rheinberger, Klaus             | Researcher and Lecturer                  | FH Vorarlberg University of Applied Sciences                     | Austria                                                    |
| Rheinschmidt, Rolf             | Scientific Assistant Life Sciences       | Rhine-Waal University of Applied Sciences                        | Germany                                                    |
| Rheinwald, Goetz               | Leader Orn. Department, retired          | Zoolog. Forschungsmuseum A. Koenig, Bonn                         | Germany                                                    |
| Rhoades, Fred M.               | Mycologist, retired                      | Western Washington University                                    | United States of America (the)                             |
| Rhodes, Chris                  | Professor, Chemistry                     | Fresh-lands Environmental Actions                                | United Kingdom of Great Britain and Northern Ireland (the) |
| Riani, Cristina                |                                          | UC Santa Cruz                                                    | United States of America (the)                             |
| Riascos, José M.               | Professor, Marine Ecology                | Universidad de Antioquia                                         | Colombia                                                   |
| Riaz, Asher                    | PhD Candidatue at IMAS                   | IMAS, University of Tasmania, Australia.                         | Australia                                                  |
| Ribas, Camila                  | Researcher / Biodiversity                | Instituto Nacional de Pesquisas da Amazônia                      | Brazil                                                     |
| Ribau Mendes, Vinícius         | Professor                                | Institute of Marine Science - Federal University of São Paulo    | Brazil                                                     |
| Ribeiro, Ricardo               | Research Fellows                         | Instituto Nacional da Mata Atlântica                             | Brazil                                                     |
| Ribeiro, Wagner                | Professor Geography                      | University of Sao Paulo                                          | Brazil                                                     |
| Ribeiro, Ângela M.             | Evolutionary Biology                     | University of Copenhagen                                         | Denmark                                                    |
| Ribeiro da Costa, Tércio       | Chemistry                                | IFCE                                                             | Brazil                                                     |
| Ribeiro da Silva, Fernanda     | post doc                                 | UFsC                                                             | Brazil                                                     |
| Ribeiro Miranda Antunes, Elisa | PhD Student                              | University of Campinas                                           | Brazil                                                     |
| Ribeiro Prist, Paula           | Pós-Doc/ Landscape Ecologist             | University of São Paulo                                          | Brazil                                                     |
| RiBSTEIN, Pierre               | Professor                                | Sorbonne University                                              | France                                                     |
| Rich, Sara                     | Assistant Professor                      | Coastal Carolina University                                      | United States of America (the)                             |
| Rich, Anina                    | Professor of Cognitive Science           | Macquarie University                                             | Australia                                                  |
| Rich, Bob                      | Psychology (retired)                     |                                                                  | Australia                                                  |
| Rich, Albert                   | Independent research / Mathematician     | –                                                                | United States of America (the)                             |
| richard, julien                | Oceanography engineer                    | Seaneo                                                           | France                                                     |
| Richard, Alison                | Professor of Anthropology emerita        | Yale University                                                  | United States of America (the)                             |
| Richard, Freddie-Jeanne        | Assistante Professor                     | Université de Poitiers                                           | France                                                     |
| Richard, Hervé                 | Research Director, paleoenvironmentalist | CNRS-Chrono-environment - University of Franche-Comté - Besançon | France                                                     |
| Richard-Molard, Céline         | Senior Scientist in Crop physiology      | INRA                                                             | France                                                     |
| Richards, Claire               | Postdoctoral Fellow, Health Services     | University of Washington                                         | United States of America (the)                             |
| Richards, Jane                 | Marine Biologist                         | Fowey Harbour Commissioners                                      | United Kingdom of Great Britain and Northern Ireland (the) |
| Richardson, Michael            | Ecologist, mycologist                    | Independent                                                      | United Kingdom of Great Britain and Northern Ireland (the) |
| Richardson, Vanessa            | Research Associate                       | UEA                                                              | United Kingdom of Great Britain and Northern Ireland (the) |
| Richardson, Leif               | Ecologist                                | University of Vermont                                            | United States of America (the)                             |

|                             |                                                                      |                                                           |                                                            |
|-----------------------------|----------------------------------------------------------------------|-----------------------------------------------------------|------------------------------------------------------------|
| Richerson, Hannah           | Environmental Science and Law                                        | University of Wisconsin-Madison                           | United States of America (the)                             |
| Richert, Laura              | Associate Professor in Public Health                                 | Univ Bordeaux                                             | France                                                     |
| Richings, Nadine            | Teaching Associate                                                   | Monash University                                         | Australia                                                  |
| Richman, David              | College Professor Emeritus                                           | New Mexico State University                               | United States of America (the)                             |
| Richmond, Courtney          | Professor of Biological Sciences                                     | Rowan University                                          | United States of America (the)                             |
| Richmond, James             | Teaching Support Fellow, School of Physics                           | The University of Melbourne                               | Australia                                                  |
| Richter, Philipp Konstantin | PhD student/biochemist                                               | Leipzig University                                        | Germany                                                    |
| Richter, Andreas            | Professor, Ecology                                                   | University of Vienna                                      | Austria                                                    |
| Rickard, Nikki              | Adjunct Associate Professor                                          | Monash University                                         | Australia                                                  |
| Rico, Eugenio               | University professor and researcher. Ecology                         | Universidad Autónoma de Madrid                            | Spain                                                      |
| Rico Cernohorska, Adriana   | Docente investigador                                                 | Instituto de Ecología - UMSA                              | Bolivia (Plurinational State of)                           |
| Rico Ramirez, Adriana       | Postdoc                                                              | UC BERKELEY                                               | United States of America (the)                             |
| RIDAME, Celine              | Oceanography                                                         | LOCEAN-SU-IPSL                                            | France                                                     |
| Ridenour, Natasha           | PhD Student                                                          | University of Alberta                                     | Canada                                                     |
| Riding, Timothy             | Marine Scientist                                                     | Ministry for the Environment                              | New Zealand                                                |
| Ridley, Amanda              | Associate Professor, Behavioural Ecology                             | University of Western Australia                           | Australia                                                  |
| Riede, Moritz               | Professor                                                            | University of Oxford, UK                                  | United Kingdom of Great Britain and Northern Ireland (the) |
| Riede, Felix                | Professor of Environmental Humanities and Climate Chnage Archaeology | Aarhus University                                         | Denmark                                                    |
| Riedel, Christian           | Lecturer, Microbiology                                               | Ulm University                                            | Germany                                                    |
| Riedel, Julia               | PhD student                                                          | Max Planck Institute for evolutionary Anthropology        | Germany                                                    |
| Riedel, Jendrian            | PhD student/Biology                                                  | James Cook University                                     | Australia                                                  |
| Riedl, Anna Luisa           | PhD in biophysical chemistry                                         | Georg-August-University Göttingen                         | Germany                                                    |
| Riedstra, Bernd             | scientist                                                            |                                                           | Netherlands (the)                                          |
| Riehl, Jennifer             | Postdoctoral Fellow                                                  | University of Wisconsin-Madison                           | United States of America (the)                             |
| Riekenberg, Philip          | Postdoctoral Researcher                                              | NIOZ Royal Netherlands Institute for Sea Research         | Netherlands (the)                                          |
| Ries, Christian             | Curator at Department of Ecology                                     | National Museum of Natural History                        | Luxembourg                                                 |
| Rieser, Philipp             | phd student, Quantum Physics                                         | University of Vienna                                      | Austria                                                    |
| Riess, Christoph            | Master of Physics                                                    | Institute for Environmental Phycs, Heidelberg             | Germany                                                    |
| Riesz, Jenny                | Physics                                                              | University of Queensland                                  | Australia                                                  |
| Riffo, Valentina            | Licenciada en Biología                                               | Universidad de Chile                                      | Chile                                                      |
| Rifkin, Riaan Francois      | Research Fellow/Palaeo-Microbiology                                  | University of Pretoria                                    | South Africa                                               |
| Riganti Fulginei, Francesco | Full Professor                                                       | Roma Tre University                                       | Italy                                                      |
| Rigg, Robin                 | Zoologist                                                            | Slovak Wildlife Society                                   | Slovakia                                                   |
| Rigo, Gabriele              | PhD Student, Physics                                                 | Syracuse University                                       | United States of America (the)                             |
| Rigolot, Eric               | Fire ecology                                                         | French National Institute of Agricultural Research (INRA) | France                                                     |
| Rijkers, Ger                | Prof Biomedical and Life Sciences                                    | University College Roosevelt                              | Netherlands (the)                                          |
| Rijsdijk, Kenneth           | Researcher Lecturer in Biogeography                                  | University of Amsterdam, IBED                             | Netherlands (the)                                          |
| Rimbach, Rebecca            | Postdoc                                                              |                                                           | Germany                                                    |

|                        |                                                                                                    |                                                                                    |                                                               |
|------------------------|----------------------------------------------------------------------------------------------------|------------------------------------------------------------------------------------|---------------------------------------------------------------|
| Rimcheska, Biljana     | PhD student                                                                                        | Institute of Biodiversity and Ecosystem Research,<br>Bulgarian Academy of Sciences | Macedonia, Republic of (the former<br>Yugoslavia)             |
| Rime, Valentin         | PhD Student in Earth Sciences                                                                      |                                                                                    | Switzerland                                                   |
| Rimet, Frédéric        | Dr. in aquatic ecology, expert on lake phytoplankton,<br>microalgae used for ecological monitoring | INRA                                                                               | France                                                        |
| Rinaldi, Giovanni      | Research Fellow                                                                                    | University of Exeter                                                               | United Kingdom of Great Britain<br>and Northern Ireland (the) |
| Rinaldi, Renaud        | Assistant Professor                                                                                | INSA Lyon                                                                          | France                                                        |
| Rinde, Eli             | Senior researcher                                                                                  | NIVA                                                                               | Norway                                                        |
| Rinderer, Michael      | Group Leader                                                                                       | University of Freiburg                                                             | Germany                                                       |
| Ringler, Eva           | Post doc, biology                                                                                  | University of veterinary medicine vienna                                           | Austria                                                       |
| Ringler, Max           | PostDoc, Behavioural Ecology                                                                       | University of Vienna                                                               | Austria                                                       |
| Ringot, Gabrielle      | PhD Ecology                                                                                        | IEES PARIS                                                                         | France                                                        |
| Rink, Thomas           | PhD student in particle physics                                                                    | MPIK Heidelberg                                                                    | Germany                                                       |
| Rinke, Christian       | Microbial Ecology                                                                                  | The University of Queensland                                                       | Australia                                                     |
| Rinnan, D. Scott       | Landscape Ecologist                                                                                | Yale University                                                                    | United States of America (the)                                |
| Rintala, Danielle      | Biological Safety Officer                                                                          | University of Wisconsin-Milwaukee                                                  | United States of America (the)                                |
| Rios, Noelia           | Marine biologist research technician                                                               | MARE-ISPA                                                                          | Portugal                                                      |
| Ríos, Jerónimo         | Research Fellow in Geopolitics                                                                     | Universidad Complutense de Madrid                                                  | Spain                                                         |
| Ríos, Carlos           |                                                                                                    | Universidad de Magallanes                                                          | Chile                                                         |
| Riou, Catherine        | Lecturer in Plant Sciences                                                                         | Limoges University                                                                 | France                                                        |
| Ripoll Alves, Alan     | Teacher on Biology                                                                                 | Federal University of Paraná                                                       | Brazil                                                        |
| Ripoll Capilla, Bernat | Co-Director                                                                                        | Borneo Nature Foundation                                                           | Indonesia                                                     |
| Rippin, David          | Senior Lecturer in Physical Geography (and<br>Glaciologist)                                        | University of York                                                                 | United Kingdom of Great Britain<br>and Northern Ireland (the) |
| Ripple, Robert         | Geophysics                                                                                         | Retired                                                                            | United States of America (the)                                |
| Rique Fernandes, Mario | Anthropology                                                                                       | Fundação Oswaldo Cruz                                                              | Brazil                                                        |
| Risch, Denise          | Marine scientist                                                                                   | SAMS                                                                               | United Kingdom of Great Britain<br>and Northern Ireland (the) |
| Risco, Cristina        | Group Leader / Cell Biology of Viral Infections                                                    | Centro Nacional de Biotecnologia, CNB-CSIC                                         | Spain                                                         |
| Rising-Moore, Carl     | Professor Emeritus.... Economics                                                                   |                                                                                    | Philippines (the)                                             |
| Risio allione, Lucia   | Post doctoral research                                                                             | Nacional University of san Luis                                                    | Argentina                                                     |
| Risos, Lamprini        | Physician cardiologist                                                                             | Erasme                                                                             | Belgium                                                       |
| Ristorcelli, Isabelle  | Researcher in Astrophysics                                                                         | CNRS                                                                               | France                                                        |
| Rita, Juan             | Professor of Botany                                                                                | Universitat de les Illes Balears                                                   | Spain                                                         |
| Ritchie, Euan          | Associate Professor in Wildlife Ecology and<br>Conservation                                        | Deakin University                                                                  | Australia                                                     |
| Ritter, Fabian         | Director of Research                                                                               | M.E.E.R. e.V.                                                                      | Germany                                                       |
| Ritter-Fiebekorn, Nils | Dipl. Environmental Scientist Climate Protection<br>Manager                                        | Leuphana University Lueneburg                                                      | Germany                                                       |
| Ritz, Simon            | PhD archaeology                                                                                    | University of Lorraine                                                             | France                                                        |
| Ritz, Catherine        | Senior Scientist in glaciology                                                                     | IGE Grenoble, CNRS / Univ Grenoble Alpes                                           | France                                                        |

|                          |                                                           |                                                                                                                           |                                                            |
|--------------------------|-----------------------------------------------------------|---------------------------------------------------------------------------------------------------------------------------|------------------------------------------------------------|
| Riul, Pablo              | Lecturer                                                  | Universidade Federal da Paraiba                                                                                           | Brazil                                                     |
| Riva, Clemence           | Biology                                                   | INRA                                                                                                                      | France                                                     |
| Rivarola, Maria          | Ecologist                                                 | University of Tennessee                                                                                                   | United States of America (the)                             |
| Rivas, Marga             | Asisstant professor                                       | University of Almeria                                                                                                     | Spain                                                      |
| Rivas, Luis              | Software Engineer                                         | CENTIMX                                                                                                                   | Mexico                                                     |
| Rivera, Vania            | PhD student                                               | University of Groningen                                                                                                   | Netherlands (the)                                          |
| Rivera, Norma            | Botanist                                                  | University of Vienna                                                                                                      | Austria                                                    |
| Rivera, Luis Osvaldo     | Researcher Conservation Biologist                         | Instituto de Ecorregiones Andinas CONICET/UNJu                                                                            | Argentina                                                  |
| RIVERA-CORREA, MAURICIO  | Professor/Herpetology                                     | UNIVERSIDAD DE ANTIOQUIA                                                                                                  | Colombia                                                   |
| Rivera-Ferre, Marta G.   | Chair Agroecology and Food Systems                        | University of Vic-Central University of Catalonia                                                                         | Spain                                                      |
| Rivera-Lavado, Alejandro | Researcher/RF and antennas                                | Carlos III University of Madrid                                                                                           | Spain                                                      |
| Rivero, Carlos           | Environmental scientist                                   |                                                                                                                           | Spain                                                      |
| Rivero Vega, Rafael A    | Graduate Student in Paleontology                          | University of Michigan                                                                                                    | United States of America (the)                             |
| Rivers, Jerry            | Environmental Scientist                                   | North American Climate, Conservation and Environment(NACCE)                                                               | United States of America (the)                             |
| Rivers, William          | Associate Professor of Science                            | SUNY Canton                                                                                                               | United States of America (the)                             |
| Rivington, Mike          | Scientist                                                 | The James Hutton Institute                                                                                                | United Kingdom of Great Britain and Northern Ireland (the) |
| Rivoirard, Sophie        | Dr Researcher Materials Science                           | CNRS                                                                                                                      | France                                                     |
| Rivot, Etienne           | Associate Professor, Fisheries, Ecology                   | Agrocampsu Ouest                                                                                                          | France                                                     |
| Rizzato, Pedro           | Postdoc in Sciences: Comparative Biology                  | FFCLRP-University of São Paulo                                                                                            | Brazil                                                     |
| Rizzo, Lucia             | Researcher                                                | Stazione Zoologica Anton Dohrn, Naples                                                                                    | Italy                                                      |
| RIZZO, LUCIANA           | Professor/ Environmental Sciences                         | Federal University of Sao Paulo                                                                                           | Brazil                                                     |
| Rizzuto, Simone          | PhD candidate Environmental Sciences                      | Lancaster University                                                                                                      | United Kingdom of Great Britain and Northern Ireland (the) |
| Roast, Michael           | PhD Candidate - Ecology                                   | Monash University                                                                                                         | United Kingdom of Great Britain and Northern Ireland (the) |
| roberson, loretta        | Associate Researcher, Marine Biology                      | Marine Biological Laboratory                                                                                              | United States of America (the)                             |
| Roberson, Leslie         | PhD Candidate, School of Earth and Environmental Sciences | University of Queensland                                                                                                  | Australia                                                  |
| Robert, Julien           | Physicist                                                 | Institut Néel CNRS                                                                                                        | France                                                     |
| Robert, Mélanie          | PhD student in biology                                    |                                                                                                                           | France                                                     |
| Robert, Alexandre        | Planetary Health Student Ambassador                       | London School of Hygiene and Tropical Medicine                                                                            | United Kingdom of Great Britain and Northern Ireland (the) |
| ROBERT, Charly           | Researcher                                                | University of Liege                                                                                                       | Belgium                                                    |
| Roberto, Danovaro        | Prof.                                                     | Polytechnic University of Marche                                                                                          | Italy                                                      |
| Roberts, Alexander J.    | Postdoctoral Research Fellow - Meteorology                | Institute of Climate and Atmospheric Science (ICAS) & National Centre for Atmospheric Science (NCAS), University of Leeds | United Kingdom of Great Britain and Northern Ireland (the) |
| Roberts, Callum          | Professor of Marine Conservation                          | University of York                                                                                                        | United Kingdom of Great Britain and Northern Ireland (the) |
| Roberts, Christine       | Mycology                                                  |                                                                                                                           | United States of America (the)                             |

|                                     |                                                                                                           |                                                                              |                                                            |
|-------------------------------------|-----------------------------------------------------------------------------------------------------------|------------------------------------------------------------------------------|------------------------------------------------------------|
| Robertshaw, Gary                    | Director                                                                                                  | Scio Learning & Research                                                     | United Kingdom of Great Britain and Northern Ireland (the) |
| Robertson, Craig                    | Lecturer in Marine Biology                                                                                | Bangor University                                                            | United Kingdom of Great Britain and Northern Ireland (the) |
| Robertson, Iain                     | Dr                                                                                                        | Swansea University                                                           | United Kingdom of Great Britain and Northern Ireland (the) |
| Robertson, Mel                      | Professor of Biology                                                                                      | Queen's University at Kingston                                               | Canada                                                     |
| Robertson, Yarrow                   | Director of Indonesia Programmes / Conservation of primates and their habitats                            | Orangutan Foundation                                                         | United Kingdom of Great Britain and Northern Ireland (the) |
| Robertson, Lynette                  | Honorary Research Fellow (Environmental Scientist)                                                        | University of Edinburgh                                                      | United Kingdom of Great Britain and Northern Ireland (the) |
| Robertson, Bruce                    | Professor in Conservation Genetics and Wildlife Management                                                | University of Otago                                                          | New Zealand                                                |
| Robidoux, Marilyne                  | Research associate in biology                                                                             |                                                                              | Canada                                                     |
| Robillard, Tony                     | Associate proessor in Evolutionary biology                                                                | Muséum national d'Histoire naturelle, Paris                                  | France                                                     |
| robin, jean patrice                 | DR CNRS biology/ecophysiology                                                                             | cnrs                                                                         | France                                                     |
| Robin, Geneviève                    | PhD                                                                                                       | École Polytechnique                                                          | France                                                     |
| ROBIN, Christophe                   | Directeur de Recherche INRA/Agronomy - Plant Science                                                      | INRA                                                                         | France                                                     |
| Robin Carneiro de Rezende, Michelle | MSc in Ecology student                                                                                    | Instituto Nacional de Pesquisas da Amazônia                                  | Brazil                                                     |
| Robinne, François-Nicolas           | Postdoctoral fellow                                                                                       | University of Alberta                                                        | Canada                                                     |
| Robins, Robert                      | Senior Biologist                                                                                          | University of Florida, Florida Museum of Natural History                     | United States of America (the)                             |
| Robins, Anthony                     | Professor of Computer Science                                                                             | University of Otago                                                          | New Zealand                                                |
| Robinson, Natasha                   | Research Fellow (ecology)                                                                                 | The Australian National University                                           | Australia                                                  |
| Robinson, David                     | Hospital Scientist (Retired)                                                                              | Dept of Microbiology and Infectious Diseases, Liverpool                      | Australia                                                  |
| Robinson, Simon                     |                                                                                                           | Swansea University                                                           | United Kingdom of Great Britain and Northern Ireland (the) |
| Robinson, Wendy                     | Professor Medical Genetics                                                                                | University of British Columbia                                               | Canada                                                     |
| Robinson, Alexander                 | Assistant professor of climate science                                                                    | Complutense University of Madrid                                             | Spain                                                      |
| Robinson, Joshua                    | Post-doc in statistical physics                                                                           | University of Bristol                                                        | United Kingdom of Great Britain and Northern Ireland (the) |
| Robinson-Rechavi, Marc              | Professor - Bioinformatics                                                                                | University of Lausanne                                                       | Switzerland                                                |
| Robledo-Arnuncio, Juan J.           | Forest Geneticist                                                                                         | INIA-CIFOR                                                                   | Spain                                                      |
| Robles, Rafael                      | Climate Change Director                                                                                   | Secretaría de Ecología y Medio Ambiente, Gobierno del estado de Quintana Roo | Mexico                                                     |
| Robroek, Bjorn                      | Lecturer in Ecology                                                                                       | University of Southampton                                                    | United Kingdom of Great Britain and Northern Ireland (the) |
| Robson, T Matthew                   | Plant Scientist, UNEP EEAP (Environmental Effects Assessment Panel) on Climate Change and Ozone Depletion | University of Helsinki                                                       | Finland                                                    |

|                                |                                                         |                                                               |                                                            |
|--------------------------------|---------------------------------------------------------|---------------------------------------------------------------|------------------------------------------------------------|
| robson-williams, melissa       | Environmental Scientist and transdisciplinary researher | Manaaki Whenua                                                | New Zealand                                                |
| Robson-Williams, Roger         | General Manager of Science - Sustainable Production     | New Zealand Institute of Plant and Food Research Ltd          | New Zealand                                                |
| Roca, Jordi                    | prof.                                                   | Universitat de Lleida                                         | Spain                                                      |
| Roces-Diaz, Jose V             | Postdoctoral researcher                                 | Swansea University                                            | United Kingdom of Great Britain and Northern Ireland (the) |
| Rocha, Iolanda                 | PosDoc                                                  | CIBIO                                                         | Portugal                                                   |
| Rocha, Inês                    | PhD student Biosciences                                 | University of Coimbra                                         | Portugal                                                   |
| Rocha, Afonso                  |                                                         | Universidade Aveiro                                           | Portugal                                                   |
| Rocha, Carlos Frederico Duarte | Full Professor                                          | Universidade do Estado do Rio de Janeiro                      | Brazil                                                     |
| Rocha, Alfredo                 | Professor                                               | University of Aveiro                                          | Portugal                                                   |
| Roche, Bernadette              | Ecologist                                               | Loyola University Maryland                                    | United States of America (the)                             |
| ROCHE, Nicolas                 | Professor (full), Chemical Engineering                  | Aix-Marseille University                                      | France                                                     |
| Rocheleau, Ghislain            | Statistical genomics                                    | Icahn School of Medicine at Mount Sinai                       | United States of America (the)                             |
| Rocío, López-Orozco            | PhD Student                                             | University of Cordoba                                         | Spain                                                      |
| Rodda, Gordon                  | Emeritus Zoologist                                      | US Geological Survey                                          | United States of America (the)                             |
| Roddy, Adam                    | Postdoctoral Fellow, Plant physiology and evolution     | School of Forestry and Environmental Studies, Yale University | United States of America (the)                             |
| Rodel, Lasco                   | Senior Scientist/Executive Director                     | ICRAF/OML Center                                              | Philippines (the)                                          |
| Rodenhause, Nicholas           | Professor of Biological Sciences, Emeritus              | Wellesley College                                             | United States of America (the)                             |
| Roder, Stefanie                | Biologist                                               |                                                               | Switzerland                                                |
| Röder, Juliane                 | Ecology                                                 | Philipps-University Marburg                                   | Germany                                                    |
| Röder, Johannes                | Research Associate in Renewable Energy Systems          | Department Resilient Energy Systems, University of Bremen     | Germany                                                    |
| Rodgers, Ku'ulei               | Marine Researcher                                       | University of Hawaii, Hawaii Institute of Marine Biology      | United States of America (the)                             |
| Rodrigo, Maria                 | Associate professor of Ecology                          | University of Valencia                                        | Spain                                                      |
| Rodrigue, Sebastien            | Professor, Biology                                      | Université de Sherbrooke                                      | Canada                                                     |
| Rodrigues, Clara               | Assistant Researcher                                    | CESAM, Universidade de Aveiro                                 | Portugal                                                   |
| Rodrigues, Elizabeth           | Msc. Zoology/PCI of CNPq-DC                             | Instituto de Desenvolvimento Sustentável Mamirauá (IDSM)      | Brazil                                                     |
| Rodrigues, Ricardo R           | Titular professor                                       | University of São Paulo                                       | Brazil                                                     |
| Rodrigues, Alice Cristina      | PHD stutend                                             | Universidade Federal de Viçosa                                | Brazil                                                     |
| Rodrigues, Kameron             | Immunology PhD Student                                  | Stanford University                                           | United States of America (the)                             |
| Rodrigues, Alice               | PhD candidate                                           | Universidade Federal de Viçosa                                | Brazil                                                     |
| Rodrigues, Patricia            | PhD Scholar                                             | Leuphana University                                           | Germany                                                    |
| RODRIGUES, DOMINGOS            | Associate professor/ Ecology and Natural Resource       | Federal University of Mato Grosso                             | Brazil                                                     |
| Rodriguez, Slendy              | PhD student                                             | University of Tartu                                           | Colombia                                                   |
| Rodriguez, Javier              | Professor, School of Life Sciences                      | University of Nevada, Las Vegas                               | United States of America (the)                             |
| Rodriguez, Carolina            | PhD student                                             | Swedish University of Agricultural Science                    | Sweden                                                     |
| Rodriguez, Cristina            | Biology                                                 | UNAM                                                          | Mexico                                                     |
| Rodriguez, Nicolas             | PhD candidate                                           | Luxembourg Institute of Science and Technology                | Luxembourg                                                 |

|                                        |                                                                |                                                                               |                                                            |
|----------------------------------------|----------------------------------------------------------------|-------------------------------------------------------------------------------|------------------------------------------------------------|
| Rodríguez, Alicia                      | Research technician                                            | CSIC                                                                          | Spain                                                      |
| Rodríguez, Dolores                     | Plant Biology                                                  | University of Salamanca                                                       | Spain                                                      |
| Rodríguez, Enrique                     | Ph.D. Student                                                  | University of Michigan - Ann Arbor                                            | United States of America (the)                             |
| Rodríguez, Ana                         | Professor                                                      | NYU School of Medicine                                                        | United States of America (the)                             |
| Rodríguez, Juan J.                     | Professor of Chemical Engineering                              | University Autonoma of Madrid                                                 | Spain                                                      |
| RODRIGUEZ, DENI                        | Titular Professor, Phycology (Biology)                         | Universidad Nacional Autónoma de México                                       | Mexico                                                     |
| Rodríguez, Teresa                      | Zoologist                                                      | Universidade de Santiago de Compostela                                        | Spain                                                      |
| Rodríguez, Alejandro                   | Researcher                                                     | EBD - CSIC                                                                    | Spain                                                      |
| Rodríguez, Alexandra                   | Postdoctoral fellow                                            | Centre for Functional Ecology, University of Coimbra                          | Spain                                                      |
| Rodríguez Álvarez, Matheus             | PhD student in Physics                                         | Martin-Luther-Universität Halle-Wittenberg                                    | Germany                                                    |
| Rodríguez Frade, Jose Miguel           |                                                                | CSIC                                                                          | Spain                                                      |
| Rodríguez García, Encarna              | Researcher Collaborator/ Forest Ecology                        | Universidad de Valladolid                                                     | Spain                                                      |
| Rodríguez Olarte, Douglas              | Professor Titular                                              | Universidad Centroccidental Lisandro Alvarado                                 | Venezuela (Bolivarian Republic of)                         |
| Rodríguez Rodríguez, Juanita Carolina  | Biologist                                                      | Universtié du Québec en Abitibi-Témiscamingue                                 | Canada                                                     |
| Rodríguez Uña, Asun                    | PhD student                                                    | Basque Centre for Climate Change - BC3                                        | Spain                                                      |
| Rodríguez Venturelli, Caterina         | Molecular Biology                                              | Cinvestav                                                                     | Mexico                                                     |
| Rodríguez Vives, Clara                 | PhD student                                                    | University of Tasmania                                                        | Australia                                                  |
| Rodríguez y Silva, Francisco           | Professor of Forest Fires Sciences and Management              | Universidad de Córdoba                                                        | Spain                                                      |
| Rodríguez-Estival, Jaime               | Environmental Scientist/Ecotoxicologist                        | University of Castilla-La Mancha                                              | Spain                                                      |
| Rodríguez-Figueroa, Griselda Margarita | Geochemistry                                                   | Centro Interdisciplinario de Ciencias Marinas, Instituto Politécnico Nacional | Mexico                                                     |
| Rodríguez-Gómez, Carlos F.             | PhD/Marine ecology                                             | Instituto de Ecología, A.C.                                                   | Mexico                                                     |
| Rodríguez-Lazaro, Julio                | Professor of Paleontology                                      | University of the Basque Country UPV/EHU                                      | Spain                                                      |
| Rodríguez-Martínez, Rosa               | Academic                                                       | Universidad Nacional Autónoma de México                                       | Mexico                                                     |
| Rodríguez-Merino, Argantonio           | Plant Biology and Ecology                                      | University of Seville                                                         | Spain                                                      |
| Rodríguez-Muñoz, Rolando               | Biology research (evolution and behaviour)                     | University of Exeter                                                          | United Kingdom of Great Britain and Northern Ireland (the) |
| Rodriguez-Puebla, Aldo                 | Research associate/astronomy                                   | IA-UNAM                                                                       | Mexico                                                     |
| Rodríguez-R, Luis Miguel               | Research Engineer                                              | Georgia Institute of Technology                                               | United States of America (the)                             |
| Rodríguez-Rodríguez, Eduardo José      | PhD student. Honorary assistant.                               | University of Seville                                                         | Spain                                                      |
| Rodríguez-Ros, Pablo                   | PhD student, Fulbright Fellow                                  | Scripps Institution of Oceanography - University of California San Diego      | United States of America (the)                             |
| Rodríguez-Santiago, Amparo             | Researcher in Parasitology of Aquatic Organisms                | Conacyt-Universidad Autónoma del Carmen                                       | Mexico                                                     |
| Roe, Frank                             | retired                                                        | Center for Biofilm Engineering, Montana State University                      | United States of America (the)                             |
| Roeleke, Manuel                        | Ecologist                                                      | University of Potsdam                                                         | Germany                                                    |
| Roellig, Kathleen                      |                                                                | Leibniz Institute for Zoo and Wildlife Research                               | Germany                                                    |
| Roemer, Charlotte                      | Ecology                                                        | Muséum National d'Histoire Naturelle                                          | France                                                     |
| Roemer, Gary                           | Professor of Wildlife Ecology                                  | New Mexico State University                                                   | United States of America (the)                             |
| Roemhild, Roderch                      | Postdoctoral Researcher, Medical Biochemistry and Microbiology | Uppsala University                                                            | Sweden                                                     |

|                              |                                                                                                  |                                                                              |                                                            |
|------------------------------|--------------------------------------------------------------------------------------------------|------------------------------------------------------------------------------|------------------------------------------------------------|
| Roessingh, Peter             | Assistant Professor, Evolutionary Biology                                                        | Institute for Biodiversity and Ecosystem Dynamics, University of Amsterdam   | Netherlands (the)                                          |
| Roethig, Till                | Postdoctoral Researcher                                                                          | University of Derby                                                          | United Kingdom of Great Britain and Northern Ireland (the) |
| Roffman, Itai                | PhD in Evolutionary Anthropology, lecturer & researcher at the dept. of Sociology & Anthropology | The Max Stern Yezreel Valley College, Israel                                 | Israel                                                     |
| Rogalsky, Tim                | Associate Professor of Mathematics                                                               | Canadian Mennonite University                                                | Canada                                                     |
| Rogan, Andrew                | Science Manager                                                                                  | Ocean Alliance                                                               | United States of America (the)                             |
| Rogaway, Phillip             | Professor, Dept. of Computer Science                                                             | University of California, Davis                                              | United States of America (the)                             |
| ROGER, FRANCOIS              | HEAD RESEARCH UNIT, EPIDEMIOLOGY                                                                 | CIRAD                                                                        | France                                                     |
| Rogers, Kerrylee             | Associate Professor in coastal and estuarine science                                             | University of Wollongong                                                     | Australia                                                  |
| Rogers, Garry                | President, PhD in Biogeography                                                                   | Agua Fria Open Space Alliance, Inc.                                          | United States of America (the)                             |
| Rogers, Brendan              | Scientist                                                                                        | Woods Hole Research Center                                                   | United States of America (the)                             |
| Rogers, Amy                  | Conservation Ecology                                                                             | UCLA Center for Tropical Research                                            | United States of America (the)                             |
| Roget, Elena                 | Associate Professor / Environmental Physics                                                      | Universitat de Girona, Catalonia                                             | Spain                                                      |
| Rogic, Anita                 | Senior Research Associate                                                                        | Icahn School of Medicine at Mount Sinai                                      | United States of America (the)                             |
| Rogissart, Lucile            | PhD candidate in Economics                                                                       | INRA                                                                         | France                                                     |
| Rogner Ramos, Renato         | Associated researcher / Ecology                                                                  | UNICAMP                                                                      | Brazil                                                     |
| Rogora, Michela              | Researcher - Freshwater                                                                          | CNR Water Research Institute                                                 | Italy                                                      |
| Rogozinska, Ewelina          | Research Fellow in Evidence Synthesis                                                            | UCL                                                                          | United Kingdom of Great Britain and Northern Ireland (the) |
| Rohde, Klaus                 | Professor emeritus Zoology                                                                       | University of New England                                                    | Australia                                                  |
| Rohlfs, Marko                | Professor, Ecology                                                                               | University of Bremen                                                         | Germany                                                    |
| Rohloff, Roland              | PhD-Student in Atmospheric Sciences                                                              | Max Planck Institute for Chemistry                                           | Germany                                                    |
| Rohrer, Jana                 | Bachelor in Physics                                                                              | University of Zurich                                                         | Switzerland                                                |
| Rohwer, Dr. Klaus            | Senior Scientist Research & Development / Physics                                                |                                                                              | Germany                                                    |
| Roig, Anna                   | Research Professor/Materials Science                                                             | ICMAB-CSIC                                                                   | Spain                                                      |
| Roig-Gómez, Sonia            | Professor of Silviculture                                                                        | Universidad Politécnica de Madrid                                            | Spain                                                      |
| Roiz, David                  | Researcher                                                                                       | Institut de Recherche pour le Développement                                  | France                                                     |
| Rojas, Bibiana               | Academy of Finland Research Fellow                                                               | University of Jyväskylä                                                      | Finland                                                    |
| Rojas Nossa, Sandra V.       | Researcher in Ecology                                                                            | University of Vigo                                                           | Spain                                                      |
| Rojas-Runjaic, Fernando J.M. | Researcher, Herpetology                                                                          | Museo de Historia Natural La Salle, Fundación La Salle de Ciencias Naturales | Venezuela (Bolivarian Republic of)                         |
| Rojas-Silva, Patricio        | Professor                                                                                        | Universidad San Francisco de Quito                                           | Ecuador                                                    |
| Rokem, Stefan                | Biotechnologist                                                                                  | The Hebrew University of Jerusalem                                           | Israel                                                     |
| Roland, Marilyn              |                                                                                                  | University of Antwerp                                                        | Belgium                                                    |
| Roland, David                | Psychology                                                                                       | University of Sydney                                                         | Australia                                                  |
| Rolandi, Ranieri             | Professor, Applied Physics, retired                                                              | University of Genoa                                                          | Italy                                                      |
| Roll, Uri                    | Senior Lecturer                                                                                  | Ben Gurion University of the Negev                                           | Israel                                                     |
| Rolland, Loïc                | Researcher                                                                                       | CNRS/LAPP                                                                    | France                                                     |
| Rolland, Filip               | Professor Molecular Plant Biology                                                                | KU Leuven - Leuven University                                                | Belgium                                                    |
| Rollins, Randi               | Research Assistant PhD student                                                                   | University of Hawaii at Manoa                                                | United States of America (the)                             |

|                          |                                                               |                                                                 |                                                            |
|--------------------------|---------------------------------------------------------------|-----------------------------------------------------------------|------------------------------------------------------------|
| Rolo, Victor             | Postdoctoral Fellow                                           | University of Extremadura                                       | Spain                                                      |
| Romagnuolo, Taea         | Conservation                                                  | University of Kent                                              | United Kingdom of Great Britain and Northern Ireland (the) |
| Romanczuk, Pawel         | Senior Researcher, Theoretical Biology and Biophysics         | Humboldt Universität zu Berlin                                  | Germany                                                    |
| Romanini, Rebeca         | PhD student, Botany                                           | UNICAMP                                                         | Brazil                                                     |
| Romano, Pedro S. R.      | Professor Associado                                           | Universidade Federal de Viçosa                                  | Brazil                                                     |
| Romanowska, Elżbieta     | professor                                                     | University of Warsaw                                            | Poland                                                     |
| Romeo, Yves              | Lecturer in Genetics                                          | University of Toulouse                                          | France                                                     |
| Romeo, Daina             | PhD student in Environmental science                          | ETH Zurich                                                      | Switzerland                                                |
| Romeralo, Carmen         | Postdoctoral Researcher on Forest Pathology                   | Swedish University of Agricultural Sciences                     | Sweden                                                     |
| Romero, Jose Maria       | Phd. Behavioral ecology                                       | CSIC                                                            | Spain                                                      |
| Romero, Camila           | Medical student                                               |                                                                 | Dominican Republic (the)                                   |
| Romero, Víctor           | Mammalogist                                                   | Universidad Simón Bolívar                                       | Venezuela (Bolivarian Republic of)                         |
| Romero, David            | Professor in Molecular Genetics                               | Ctr. Of Genomic Sciences, Natl. Autonomous University of Mexico | Mexico                                                     |
| Romero, Gustavo          | Associate Professor, Ecologist                                | University of Campinas (UNICAMP)                                | Brazil                                                     |
| Romero García, Pablo     | Biotechnology                                                 | Universidad de Valencia                                         | Spain                                                      |
| Romero Noguera, Pablo    | PhD Dr Social Anthropology                                    | University of Barcelona                                         | Spain                                                      |
| Romero-Centeno, Rosario  | Research Scientist                                            | UNAM                                                            | Mexico                                                     |
| Rommevaux, Céline        | Researcher / Geomicrobiology                                  | CNRS-UMR7294 MIO Marseille                                      | France                                                     |
| Roncero-Ramos, Beatriz   | Soil restoration, biocrusts, cyanobacteria                    | University of Almería                                           | Spain                                                      |
| Ronchail, Josyane        | Teacher and researcher                                        | Paris-Diderot University                                        | France                                                     |
| Ronga, Domenico          | Researcher as Agronomist                                      | University of Modena and Reggio Emilia                          | Italy                                                      |
| Rönnelid, Mats           | Professor in Energy Technology                                | Dalarna UNiversity                                              | Sweden                                                     |
| Ronse, Anne              | Plant conservation biology                                    | Meise Botanic Garden                                            | Belgium                                                    |
| Rood, Richard            | Professor, Climate and Space Sciences and Engineering (CLaSP) | University of Michigan                                          | United States of America (the)                             |
| Rooney-Varga, Juliette   | Climate change and sustainability                             | UMass Lowell Climate Change Initiative                          | United States of America (the)                             |
| Root, Terry L            | Senior Fellow, Emerita                                        | Stanford University                                             | United States of America (the)                             |
| Root-Bernstein, Meredith | Conservation ecologist                                        | Instituto de Ecología y Biodiversidad                           | Chile                                                      |
| Roper, Andrea            | Biologist, Human Therapeutic Product Evaluator                | Health Canada, Federal Government                               | Canada                                                     |
| Roper, Erika             | PhD researcher, Urban Ecology                                 | The University of Western Australia                             | Australia                                                  |
| ROPERT-COUDERT, Yan      | Permanent researcher                                          | CNRS-CEBC UMR7372                                               | France                                                     |
| Roques, Francoise        | astronome                                                     | Observatoire de Paris                                           | France                                                     |
| Roques, Sébastien        | PhD Student, Ecology                                          | Université Paul Sabatier Toulouse 3                             | France                                                     |
| Rosa, Clarissa           | Researcher                                                    | Instituto Nacional de Pesquisas da Amazônia (INPA)              | Brazil                                                     |
| Rosa, Gonçalo M.         |                                                               | Institute of Zoology, Zoological Society of London              | United Kingdom of Great Britain and Northern Ireland (the) |
| Rosa, Augusto            | PhD student                                                   | Universidade Estadual de Campinas                               | Brazil                                                     |
| Rosa Cota, Vinícius      | Associate Professor / Neuroengineering                        | Federal University of São João Del-Rei                          | Brazil                                                     |
| Rose, Kenneth            | Professor                                                     | University of Maryland Center for Environmental Science         | United States of America (the)                             |

|                             |                                                               |                                                                                           |                                                            |
|-----------------------------|---------------------------------------------------------------|-------------------------------------------------------------------------------------------|------------------------------------------------------------|
| Rosell, Julieta             |                                                               | Universidad Nacional Autónoma de México                                                   | Mexico                                                     |
| Roselló, Juan               | Biochemistry                                                  |                                                                                           | Dominican Republic (the)                                   |
| Rosemond, Amy               | Professor of Ecology                                          | University of Georgia                                                                     | United States of America (the)                             |
| Rosen, Rudolph              | Professor and Director Inst. Water Resources Science and Tech | Texas A&M University in San Antonio                                                       | United States of America (the)                             |
| Rosenbaum, Peter A          | Professor of Biological Sciences                              | State University of New York @ Oswego                                                     | United States of America (the)                             |
| Rosenblatt, Adam            | Assistant Professor, Biology                                  | University of North Florida                                                               | United States of America (the)                             |
| Rosenburgh, Angus           | Assistant Professor, Biosciences                              | Durham University                                                                         | United Kingdom of Great Britain and Northern Ireland (the) |
| Rosenfield, Gabriel         |                                                               | UC Berkeley                                                                               | United States of America (the)                             |
| Rosengrave, Patrice         | Research fellow                                               | Otago University                                                                          | New Zealand                                                |
| Rosenow, Patrick            | Editor-in-Chief                                               | German Review on the United Nations / United Nations Association of Germany (UNA Germany) | Germany                                                    |
| Rosenthal, Michael          | Graduate Student in Conservation Biology                      | State University of New York                                                              | United States of America (the)                             |
| Rosier, Anne Sophie         | veterinary                                                    |                                                                                           | Congo (the)                                                |
| Rosnell, Harrison           | Environmental scientist                                       | Griffith University                                                                       | Australia                                                  |
| Rosner, Sabine              | Assoc. Professor                                              | University of Natural Resources and Life Sciences, Vienna                                 | Austria                                                    |
| Ross, Samuel                | PhD: Global change and ecological stability                   | Trinity College Dublin                                                                    | Ireland                                                    |
| Rossi, Natacha              | Post doc in ethology                                          |                                                                                           | France                                                     |
| Rossi, Sergio               | Associate Professor                                           | University of Salento                                                                     | Italy                                                      |
| Rossi, María Susana         | Evolutionary Genetics                                         | Investigator of CONICET                                                                   | Argentina                                                  |
| ROSSI, Vincent              | Research Scientist in Ocean Sciences                          | MIO-CNRS                                                                                  | France                                                     |
| Rossi Caruzo, Maria Beatriz | Adjunct Professor / Botany                                    | Universidade Federal de São Paulo (Unifesp)                                               | Brazil                                                     |
| Rossi Nakayama, Cristina    | Assistant professor                                           | Federal University of Sao Paulo                                                           | Brazil                                                     |
| Rossigalli, Nathalia        | PhD Student                                                   | University of São Paulo                                                                   | Brazil                                                     |
| Rossignol, Benoit           | Tenured assistant professor on history                        | Université Paris 1 Panthéon-Sorbonne                                                      | France                                                     |
| Rosswall, Thomas            | Professor emeritus                                            |                                                                                           | Sweden                                                     |
| Rost, Nicolas               | PhD student                                                   | Max Planck Institute of Psychiatry, Munich                                                | Germany                                                    |
| Rostan, Julie               | PhD student in Marine Social Sciences                         | University of the Highlands and Islands                                                   | United Kingdom of Great Britain and Northern Ireland (the) |
| Rostański, Adam             | DSc. PhD                                                      | Uniwersytet Śląski                                                                        | Poland                                                     |
| ROTA, THIBAUT               | Researcher in Ecology                                         | CNRS                                                                                      | France                                                     |
| Roth, Nicolas               | Environmental Physics                                         | IUP Heidelberg                                                                            | Germany                                                    |
| Roth, Aurora                | Geophysics                                                    | University of Alaska Fairbanks                                                            | United States of America (the)                             |
| Roth, Markus                | Senior scientist / Astroparticle physics                      | Karlsruhe Institute of Technology                                                         | Germany                                                    |
| Rothlauf, Franz             | Full Professor of Information Systems                         | University of Mainz                                                                       | Germany                                                    |
| Rothman, Andrea             | Biology                                                       |                                                                                           | United States of America (the)                             |
| Rotmann, Sea                | Operating Agent                                               | IEA DSM Technology Collaboration Programme                                                | New Zealand                                                |
| Rotschi, Julie              | PhD student in paleolimnology and ecology                     | INRA                                                                                      | France                                                     |
| rotter, shlomo              | CEO                                                           | Smart Diamond Technologies Lda                                                            | Israel                                                     |

|                       |                                                         |                                                                                                           |                                                            |
|-----------------------|---------------------------------------------------------|-----------------------------------------------------------------------------------------------------------|------------------------------------------------------------|
| ROTURIER, jacques     | Physicist                                               | Independent researcher (retired from Bordeaux University)                                                 | France                                                     |
| Rouby, Etienne        | PhD Student                                             | La Rochelle Université                                                                                    | France                                                     |
| Rouch, Laly           | PhD Student                                             | INRA                                                                                                      | France                                                     |
| Rouco, Carlos         | Assitant Professor in Ecology                           | Ecology area of the University of Córdoba                                                                 | Spain                                                      |
| Roucoux, Katherine    | Senior Lecturer, physical geography                     | University of St Andrews                                                                                  | United Kingdom of Great Britain and Northern Ireland (the) |
| Rougemont, Quentin    | Postdoctoral researcher                                 | Université Laval                                                                                          | Canada                                                     |
| Rougeux, Clément      | Postdoctoral Researcher                                 | University of Calgary                                                                                     | Canada                                                     |
| Rouhan, Germinal      | Assistant Professor / Plant Systematics and Evolution   | Museum national d'Histoire naturelle                                                                      | France                                                     |
| Roukema, Boudewijn    | professor, cosmology                                    | Toruń Centre for Astronomy, Faculty of Physics, Astronomy and Informatics, Nicolaus Copernicus University | Poland                                                     |
| Roulé, Thomas         | Phd student, Molecular Biology                          | Institute of Plant Sciences Saclay                                                                        | France                                                     |
| Roulet, Mélanie       | PhD Student                                             | Laboratoire d'Astrophysique de Marseille (LAM)                                                            | France                                                     |
| Round, Christopher    | Senior Climate Change Specialist                        | Booz Allen Hamilton                                                                                       | United States of America (the)                             |
| Roura Grabulosa, Pere | Professor in Materials Science                          | Universitat de Girona                                                                                     | Spain                                                      |
| rousseau, marine      | PhD student                                             | Chrono-environment laboratory (Besançon)                                                                  | France                                                     |
| Rousseau, Guillaume   | Professor                                               | Maranhão State University                                                                                 | Brazil                                                     |
| Rousseau, Elsa        | Postdoc in mathematical modeling of infectious diseases |                                                                                                           | France                                                     |
| Rousselle, Marjolaine | Post-doctoral fellow in genetic and genomics            | Bioinformatics Research Center, Aarhus University                                                         | Denmark                                                    |
| Rousset, Francois     | Senior scientist, Evolutionary Biology                  | CNRS                                                                                                      | France                                                     |
| Rout, Tracy           | Senior Research Fellow, Conservation Science            | University of Queensland                                                                                  | Australia                                                  |
| Routledge, Paul       | Professor in Geography                                  | University of Leeds                                                                                       | United Kingdom of Great Britain and Northern Ireland (the) |
| Roux, Natacha         | PhD in Marine Biology                                   | Observatoire Océanologique de Banyuls sur mer BIOM UMR7232                                                | France                                                     |
| Roux, Camille         | CR                                                      | CNRS - Univ. Lille                                                                                        | France                                                     |
| ROUX, David           | Assistant professor / Plant Biology                     | Avignon university                                                                                        | France                                                     |
| ROUX, Philippe        | Research in Life Cycle Assessment (LCA)                 | Irstea                                                                                                    | France                                                     |
| ROUX, Olivier         | Researcher / ecology                                    | IRD                                                                                                       | France                                                     |
| Rouyer, Marie-Morgane | MSc student / Applied Ecology                           | University of East Anglia                                                                                 | France                                                     |
| Rovelli, Giacomo      | PhD Student                                             | University of Perugia                                                                                     | Italy                                                      |
| Rovero, Francesco     | Assistant Professor in Ecology                          | University of Florence                                                                                    | Italy                                                      |
| Roveta, Camilla       | PhD student in Environmental and Civil Protection       | Polytechnic University of Marche                                                                          | Italy                                                      |
| Rovira, Pere          | Researcher / Soil Science                               | Forest Sciences Centre of Catalonia (CTFC)                                                                | Spain                                                      |
| Rowe, Randall         | Plant Pathologist                                       | Ohio State University                                                                                     | United States of America (the)                             |
| Rowe, Noel            | Director                                                | Primate Conservation Inc. Co Editor of All the Worlds' Primates                                           | United States of America (the)                             |
| Rowland, Mary         | Research wildlife biologist                             | PNW Research Station, USDA Forest Service                                                                 | United States of America (the)                             |

|                         |                                                                        |                                                                                                      |                                                            |
|-------------------------|------------------------------------------------------------------------|------------------------------------------------------------------------------------------------------|------------------------------------------------------------|
| Rowland, Lucy           | Senior lecturer in physical geography                                  | University of Exeter                                                                                 | United Kingdom of Great Britain and Northern Ireland (the) |
| Roy, Lise               | assistant professor in Ecology                                         | Université Paul-Valéry Montpellier 3 - Centre d' Ecologie Fonctionnelle et Evolutive (UMR 5175 CEFE) | France                                                     |
| ROY, Mélanie            | Assistant professor in ecology                                         | Université Paul Sabatier                                                                             | France                                                     |
| Roy Chaudhuri, Nairita  | PhD Researcher (Climate change law and autonomous adaptation in India) | Tilburg University                                                                                   | Netherlands (the)                                          |
| Royer, Mark             | PhD Candidate / Marine Biology                                         | Hawaii Institute of Marine Biology                                                                   | United States of America (the)                             |
| Royer, Colin            | PhD in Oceanography                                                    | Université Libre de Bruxelles                                                                        | Belgium                                                    |
| Royle, Nick             | Senior Lecturer in Behavioural Ecology                                 | University of Exeter                                                                                 | United Kingdom of Great Britain and Northern Ireland (the) |
| Rozen-Rechels, David    | Behavioral Ecologist                                                   | Institut d'Écologie et des Sciences de l'Environnement de Paris                                      | France                                                     |
| Rozenberg, Philippe     | Research director, forest scientist                                    | INRA                                                                                                 | France                                                     |
| Rozgonjuk, Dmitri       | Junior Research Fellow                                                 | University of Tartu                                                                                  | Estonia                                                    |
| Rozsa, Lajos            | senior researcher                                                      | Hungarian Academy of Sciences                                                                        | Hungary                                                    |
| Rua, Alex               | Adjunct Professor, Oceanography                                        | University of Antioquia                                                                              | Colombia                                                   |
| Ruano, Irene            | Postdoc in forestry                                                    | Instituto Universitario de investigación gestión forestal sostenible -universidad de Valladolid      | Spain                                                      |
| Ruault, Jean-François   | Researcher                                                             |                                                                                                      | France                                                     |
| Ruau, Geoffrey          | PhD Animal Behaviour                                                   |                                                                                                      | France                                                     |
| Rubalcava-Gracia, Diana | Postdoctoral Researcher                                                | Karolinska Institute                                                                                 | Sweden                                                     |
| Rubbens, Peter          | PhD Student                                                            | Ghent University                                                                                     | Belgium                                                    |
| Rubido, Nicolás         | Adjunct Professor                                                      | Universidad de la República                                                                          | Uruguay                                                    |
| Rubinat-Ripoll, Laura   | PhD student in Microbial Ecology                                       | Station Biologique de Roscoff (CNRS - Sorbonne Université)                                           | Spain                                                      |
| Rubioff, Daniel         | Professor                                                              | University of Hawaii                                                                                 | United States of America (the)                             |
| Rubolini, Diego         | Associate Professor of Ecology                                         | Dipartimento di Scienze e Politiche Ambientali, Università di Milano                                 | Italy                                                      |
| Rücklin, Martin         | Senior researcher Palaeobiology                                        | Naturalis Biodiversity Center                                                                        | Netherlands (the)                                          |
| Rudd, Jennifer A.       | Research Officer, Chemistry                                            | Swansea University                                                                                   | United Kingdom of Great Britain and Northern Ireland (the) |
| Rudelt, Lucas           | Doctoral student in computational neuroscience                         | MPI Dynamics and Self-Organization                                                                   | Germany                                                    |
| Rudolph, Barbara        | Scientist, Phylogeography and Evolution of Plants                      | Universität Hamburg                                                                                  | Germany                                                    |
| Rudolph, Terence        | PhD Astro-Geophysics                                                   |                                                                                                      | United States of America (the)                             |
| Rué, Mathieu            | Geoarchaeologist / PhD student                                         | Paléotime / UMR5140 Montpellier                                                                      | France                                                     |
| Rueda Sevilla, Juan     | Researcher/Biodiversity                                                | University of Valencia                                                                               | Spain                                                      |
| Ruedas, Luis            | Professor of Biology                                                   | Portland State University                                                                            | United States of America (the)                             |
| RUEDAS, REMI            | Study Engineer                                                         | CNRS (Centre National de la Recherche Scientifique)                                                  | France                                                     |
| Ruedenauer, Fabian A.   | Nutritional Ecology                                                    | Zoology III, Biocenter, University of Würzburg                                                       | Germany                                                    |
| Ruess, Anja K           | Research Associate / Doctoral Student, Science and Technology Studies  | Technical University of Munich                                                                       | Germany                                                    |

|                                |                                                        |                                                             |                                                            |
|--------------------------------|--------------------------------------------------------|-------------------------------------------------------------|------------------------------------------------------------|
| Ruff, Martin                   | Physics                                                | Universität Ulm (PhD)                                       | Germany                                                    |
| Ruffini, Giulio                | CSO                                                    | Starlab                                                     | Spain                                                      |
| Rufin, Philippe                | Researcher in Remote Sensing                           | Humboldt-Universität zu Berlin                              | Germany                                                    |
| Rugh, John                     | Professor & Director, Evidence-Based Practice Program  | Univ of Texas Health Science San Antonio TX                 | United States of America (the)                             |
| Rughani, Deepak                | Co-director                                            | Biofuelwatch                                                | United Kingdom of Great Britain and Northern Ireland (the) |
| Ruhl, Nathan                   | Lecturer                                               | Rowan University                                            | United States of America (the)                             |
| Ruhland, Christopher T.        | Professor of Biological Sciences                       | Minnesota State University, Mankato                         | United States of America (the)                             |
| Ruimy, Anne                    | PhD in Ecology                                         | EDP Sciences                                                | France                                                     |
| Ruiz, Mateo                    | Assistant Conservation & Science Officer               | Barn Owl Trust                                              | United Kingdom of Great Britain and Northern Ireland (the) |
| Ruiz, Jose Luis                | PhD Student                                            | IPBLN-CSIC                                                  | Spain                                                      |
| Ruiz, Lidia                    | Astronomy/Physics                                      |                                                             | United States of America (the)                             |
| Ruiz, Philippe                 | Ingenier                                               | INRA                                                        | France                                                     |
| Ruiz, Ana                      | Researcher in Marine Environmental Science             | IMEDEA (UIB-CSIC)                                           | Spain                                                      |
| Ruiz, Lucas                    | Researcher                                             | IANIGLA CONICET                                             | Argentina                                                  |
| RUIZ, PEDRO PAREDES            | ENVIRONMENT TECHNICAL                                  | PUBLIC ADMINISTRATION                                       | Spain                                                      |
| Ruiz Buendía, Gustavo          | PhD student in Genomic Sciences                        | Center for Integrative Genomics                             | Switzerland                                                |
| Ruiz De Gamboa, Margarita      | PhD, Biologist                                         | Arturo Prat University                                      | Chile                                                      |
| Ruiz Lopez, Maria Jose         | Postdoctoral Researcher in Molecular Ecology           | Consejo Superior de Investigaciones Científicas             | Spain                                                      |
| Ruiz Peyré, Fernando           | Geographer                                             | University of Innsbruck                                     | Austria                                                    |
| Ruiz Suárez, Luis Gerardo      | Tenure Scientist/ Atmospheric Chemistry                | Universidad Nacional Autónoma de México                     | Mexico                                                     |
| RUIZ-FONS, FRANCISCO           | WILDLIFE DISEASE EPIDEMIOLOGIST                        | Spanish National Research Council                           | Spain                                                      |
| Ruiz-Mirazo, Kepa              | Full time researcher                                   | University of the Basque Country                            | Spain                                                      |
| Ruiz-Navarro, Ana              |                                                        | Universidad de Murcia                                       | Spain                                                      |
| Rulik, Björn                   | Taxonomic Coordination GBOL / Dipterist                | Zoologisches Forschungsmuseum A. Koenig                     | Germany                                                    |
| Rullán Silva, Cristóbal Daniel | Research professor/Remote Sensig and GIS of Vegetation | DACBiol, Universidad Juárez Autónoma de Tabasco             | Mexico                                                     |
| Rullière, Pauline              | Chemist Researcher                                     | University Paul Sabatier                                    | France                                                     |
| Rullman, Stan                  | Director of Research                                   | Earthwatch Institute                                        | United States of America (the)                             |
| Rumeu, Beatriz                 | Postdoc fellow, Ecology                                | Universidad de Oviedo                                       | Spain                                                      |
| Rumpel Teixeira, Lauren        | Doutorando                                             | Universidade de Brasília                                    | Brazil                                                     |
| Rumpf, Sabine                  | Postdoc                                                | University of Vienna                                        | Austria                                                    |
| Runge, Anne Kathrine           | PhD student in Archaeology and Molecular Biology       | University of York                                          | United Kingdom of Great Britain and Northern Ireland (the) |
| Ruokolainen, Kalle             | Plant ecologist                                        | University of Turku                                         | Finland                                                    |
| Ruoss, Engelbert               | Lecturer                                               | University of Southern Switzerland                          | Switzerland                                                |
| Rupke, David                   | Associate Professor of Physics                         | Rhodes College                                              | United States of America (the)                             |
| Rupp, Sebastian                | Post Doc Biology                                       | Heidelberg University                                       | Germany                                                    |
| Ruppert, Jan Christian         | Assistant Professor in Plant Ecology                   | Institute of Evolution and Ecology, University of Tuebingen | Germany                                                    |

|                          |                                                                      |                                                                                                             |                                                            |
|--------------------------|----------------------------------------------------------------------|-------------------------------------------------------------------------------------------------------------|------------------------------------------------------------|
| Ruppert, Nadine          | Primatologist                                                        | Universiti Sains Malaysia                                                                                   | Malaysia                                                   |
| Ruprecht, Eszter         | associate professor                                                  | Babes-Bolyai University Cluj                                                                                | Romania                                                    |
| Rurali, Riccardo         |                                                                      | Institut de Ciència de Materials de Barcelona (ICMAB-CSIC)                                                  | Spain                                                      |
| Rusch, Verónica          | Researcher, Forest Ecology                                           | INTA                                                                                                        | Argentina                                                  |
| Rusconi, Filippo         | Researcher                                                           | Centre national de la recherche scientifique (CNRS, France)                                                 | France                                                     |
| Rushforth, Sam           | Dean of Science Emeritus                                             | Utah Valley University                                                                                      | United States of America (the)                             |
| Rushworth, Ian           | Ecologist and Scientific Manager                                     | Ezemvelo KwaZulu-Natal Wildlife                                                                             | South Africa                                               |
| Russak, Zeev             | CTO                                                                  | Diagnostics.Ai                                                                                              | United Kingdom of Great Britain and Northern Ireland (the) |
| Russell, Tracey          | Conservation biologist                                               |                                                                                                             | Australia                                                  |
| Russell, Andy            | Professor in Animal Behaviour                                        | University of Exeter                                                                                        | United Kingdom of Great Britain and Northern Ireland (the) |
| Russell, Debbie          | Senior Research Fellow                                               | University of St Andrews                                                                                    | United Kingdom of Great Britain and Northern Ireland (the) |
| Russell, Roly            | Ecology and society                                                  | Sandhill Institute / Columbia University (most recent)                                                      | Canada                                                     |
| Russell, Greg            | Profess of Chemistry, and President of the Polymer Division of IUPAC | University of Canterbury                                                                                    | New Zealand                                                |
| Russell-Buckland, Joshua | Research Assistant in Medical Physics and Biomedical Engineering     | University College London                                                                                   | United Kingdom of Great Britain and Northern Ireland (the) |
| Russo, Arturo            | Full professor (retired) of History of Physics                       | University of Palermo (Italy)                                                                               | Italy                                                      |
| Rusu, Alina Simona       | Associate Professor/ Animal Psychology                               | Babes-Bolyai University                                                                                     | Romania                                                    |
| Rüter, Sebastian         | Senior Scientist                                                     | Thünen Institute of Wood Research at the Federal Research Institute for Rural Areas, Forestry and Fisheries | Germany                                                    |
| Rutger, Wilschut         | PostDoc                                                              | University of Konstanz                                                                                      | Germany                                                    |
| Ruth, Nicolas            | Postdoctoral researcher in Psychology                                | Goldsmiths, University of London                                                                            | United Kingdom of Great Britain and Northern Ireland (the) |
| Ruuskanen, Taina         | Director of Bachelor in Physical Sciences                            | University of Helsinki                                                                                      | Finland                                                    |
| RUY, Stephane            | Scientist in soil physics, agronomy, hydrology                       | INRA                                                                                                        | France                                                     |
| Ruzickova, Natalia       | PhD student                                                          | Institute of Science and Technology Austria                                                                 | Austria                                                    |
| Ryan, Greer              | Renewable Energy Research                                            | Center for Biological Diversity                                                                             | United States of America (the)                             |
| Ryan, Ken                | Associate Professor of Antarctic Biology                             | Victoria University of Wellington                                                                           | New Zealand                                                |
| Ryan, Kathleen           | Associate Professor                                                  | University of California, Berkeley                                                                          | United States of America (the)                             |
| Ryan, Peter G.           | Director, FitzPatrick Insititute of African Ornithology              | University of Cape Town                                                                                     | South Africa                                               |
| Ryan, Patrick (Paddy)    | Professor                                                            | Colorado School of Mines and Metropolitan State University of Denver                                        | United States of America (the)                             |
| Ryan, Sadie              | Associate Professor, Medical Geography                               | University of Florida                                                                                       | United States of America (the)                             |
| Rybak, Ivan              | Junior Researcher , cosmology                                        | Institute of Astrophysics and Space Sciences (IA), Porto                                                    | Portugal                                                   |
| Rybizki, Jan             | Postdoc Astronomy                                                    | Max Planck Institute for Astronomy                                                                          | Germany                                                    |
| Rybka, Harald            | Climate Scientist                                                    | German Weather Service                                                                                      | Germany                                                    |

|                              |                                                                |                                                                                           |                                |
|------------------------------|----------------------------------------------------------------|-------------------------------------------------------------------------------------------|--------------------------------|
| Rybníček, Michal             | Assoc. Prof., researcher, dendrochronologist                   | Mendel University in Brno & Global Change Research<br>Institute Czech Academy of Sciences | Czech Republic (the)           |
| Rybski, Paul                 | Professor Emeritus, Physics                                    | University of Wisconsin-Whitewater                                                        | United States of America (the) |
| Rychlak, Yvonne              | Biodiversity and Nature Protection                             |                                                                                           | Germany                        |
| Ryerson, William             | President                                                      | Population Media Center                                                                   | United States of America (the) |
| Ryffel, Gerhart              | Professor of Cell Biology                                      | Institut für Zellbiologie                                                                 | Germany                        |
| Rykowski, Kazimierz          | Professor forest ecology                                       | Forest Research Institute                                                                 | Poland                         |
| Ryszawska, Bożena            | Profesor/ Economics                                            | Wroclaw University of Economics                                                           | Poland                         |
| Rzedowski, Martha            | Mathematics                                                    | Cinvestav                                                                                 | Mexico                         |
| S, Santosh                   | Graduate Student                                               | JNCASR                                                                                    | India                          |
| S. de Souza, Rafael          | Researcher, Astrophysics                                       | University of North Carolina at Chapel Hill                                               | United States of America (the) |
| S. Hofmann, Gabriel          | Researcher/Climate                                             | Universidade La Salle, Canoas                                                             | Brazil                         |
| Sá, Rui M.                   | Integrated Researcher                                          | University of Lisbon                                                                      | Portugal                       |
| Saada, Georges               | Physics                                                        | Retired                                                                                   | France                         |
| Saalmann, Franziska          | Marine Biology                                                 | University of Groningen                                                                   | Netherlands (the)              |
| Sabaté, Santi                | Prof. of Ecology                                               | University of Barcelona and CREAM                                                         | Spain                          |
| Sabatino, Stephen            | Evolutionary Biologist/Bioinformatician                        | University of Porto                                                                       | Portugal                       |
| Sabbagh, Audrey              | Associate Professor                                            | Université de Paris                                                                       | France                         |
| Sabbi, Kris                  |                                                                | University of New Mexico                                                                  | United States of America (the) |
| Sabel, Maike                 | PhD Student, Limnology                                         | University of Konstanz                                                                    | Germany                        |
| Sabine Adeline, Fanta Yadang | Researcher                                                     | Institute of Medical Research and Medicinal Plants<br>Studies                             | Cameroon                       |
| Sabogal, Nelson              | Master of Science in Meteorology                               | Former, Scientist Ozone Secretariat, UNEP                                                 | Colombia                       |
| Saccoccio, Muriel            | Engineer + Ph D/ Space observation/Physics                     | Cnes (French Space Agency)                                                                | France                         |
| Saccol, Suelen               | PhD Candidate                                                  | Universidade Federal de Santa Maria (UFSM)                                                | Brazil                         |
| Sachdeva, Himani             | postdoc                                                        | IST Austria                                                                               | Austria                        |
| Sache, Ivan                  | Professor of Plant Pathology and Epidemiology                  | AgroParisTech                                                                             | France                         |
| Sackett, Penny D             | PhD Physics, Honorary Professor at Climate Change<br>Institute | Australian National University                                                            | Australia                      |
| Sacks, Laura                 | Hydrologist (retired)                                          | U.S. Geological Survey                                                                    | Canada                         |
| Saclier, Nathanaëlle         |                                                                | Université Claude-Bernard Lyon1                                                           | France                         |
| Sadai, Shaina                | PhD Candidate, Climate Systems Research                        | UMass Amherst                                                                             | United States of America (the) |
| Sadedin, Suzanne             | Evolutionary biologist                                         |                                                                                           | United States of America (the) |
| Saebelfeld, Manja            | Postdoc, Evolutionary Biology                                  |                                                                                           | Germany                        |
| Saeed, Uzma                  | PhD Research Scholar                                           | University of Massachusetts                                                               | United States of America (the) |
| Sáenz-Romero, Cuauhtémoc     | Researcher                                                     | Universidad Michoacana de San Nicolás de Hidalgo                                          | Mexico                         |
| Safari, Ignas                | Conservation Biologist                                         | University of Dodoma                                                                      | Tanzania, United Republic of   |
| Safdari, Pezhman             | Researcher                                                     | University of Helsinki                                                                    | Finland                        |
| Sage, Samuel H.              | Senior Scientist                                               | Atlantic States Legal Foundation, Inc.                                                    | United States of America (the) |
| Sagouis, Alban               | Ecology                                                        | iDlv                                                                                      | Germany                        |
| saha, amartya                | Ecohydrologist/Instrumentation                                 | Archbold Biological Station                                                               | United States of America (the) |

|                               |                                                       |                                                                 |                                                            |
|-------------------------------|-------------------------------------------------------|-----------------------------------------------------------------|------------------------------------------------------------|
| Saha, Haymanti                | PhD Student                                           | NIOO                                                            | Netherlands (the)                                          |
| Saharan, Ketul                | Junior Research Fellow                                | Institute of Life Sciences Bhubaneshvar                         | India                                                      |
| Sahonero Canavesi, Diana X.   | Postdoctoral researcher                               | NIOZ                                                            | Netherlands (the)                                          |
| Sahoo, Gobardhan              | Postdoctoral researcher                               | University of Haifa                                             | Israel                                                     |
| Sahu, Abhipsa                 | PhD student - Biological Sciences                     | Xi'an Jiaotong-Liverpool University                             | China                                                      |
| Saigo, Miguel                 | PhD Biology                                           |                                                                 | Argentina                                                  |
| Saini, Romesh                 | Clinical Scientist                                    | Multicare Health System                                         | United States of America (the)                             |
| Sainsbury, Nigel              | Geography                                             | University of Exeter                                            | United Kingdom of Great Britain and Northern Ireland (the) |
| Sainsbury, Anthony            | Senior Lecturer                                       | Institute of Zoology                                            | United Kingdom of Great Britain and Northern Ireland (the) |
| Saint-Amand, Antoine          | PhD Student in bioscience engineering                 | UCLouvain                                                       | Belgium                                                    |
| Saint-Charles, Johanne        | Professor                                             | Université du Québec à Montréal                                 | Canada                                                     |
| Saito, Carlos Hiroo           | Vice-Director of the Institute of Biological Sciences | University of Brasilia                                          | Brazil                                                     |
| Sakdapolrak, Patrick          | Professor / Geography                                 | University of Vienna                                            | Austria                                                    |
| Saksa, Kristin                | Graduate Researcher in ichthyology                    | Moss Landing Marine Labs                                        | United States of America (the)                             |
| Sala, Iria                    | PhD student                                           | University of Cádiz                                             | Spain                                                      |
| Salado, Isabel                | PhD candidate                                         | Spanish Research Council CSIC                                   | Spain                                                      |
| Salafsky, Susan               | Ecologist                                             | 500 Women Scientists                                            | United States of America (the)                             |
| Šalamon, Dragica              | assistant professor                                   | University of Zagreb Faculty of Agriculture                     | Croatia                                                    |
| Salari, Seppe                 | Entomologist                                          | corporate                                                       | Netherlands (the)                                          |
| Salas Reyes, Raul             | PhD candidate                                         | University of Toronto Scarborough                               | Canada                                                     |
| Salas-Vidal, Enrique          | Professor/Developmental Biology                       | UNAM                                                            | Mexico                                                     |
| Salat, Jordi                  | Oceanographer                                         | Institut de Ciències del Mar (CSIC)                             | Spain                                                      |
| Salazar-Mendías, Carlos       | Tenured Professor (Botany)                            | University of Jaén                                              | Spain                                                      |
| Salcido Guevara, Luis Antonio | Research Professor                                    | Autonomous University of Sinaloa                                | Mexico                                                     |
| Saldanha Bueno, Anderson      | Lecturer in Biology and Ecology                       | Instituto Federal de Educação, Ciência e Tecnologia Farroupilha | Brazil                                                     |
| Saldanha-Correa, Flavia       | Biologist                                             | São Paulo University                                            | Brazil                                                     |
| Sale, Peter F                 | Distinguished University Professor (Emeritus)         | University of Windsor                                           | Canada                                                     |
| Salemi, Taddei                | Neurobiology                                          | EMBL Rome                                                       | Italy                                                      |
| Salerno, Franco               | researcher                                            | IRSA-CNR                                                        | Italy                                                      |
| Salerno, Carlo                | Biologist                                             | Italian National Researches Council - Water Research Institute  | Italy                                                      |
| Salgado, Paula                | Senior Lecturer                                       | Newcastle University                                            | United Kingdom of Great Britain and Northern Ireland (the) |
| Salgado, Moises               | Msc. on Remote Sensing                                | National Institute for Space Research                           | Brazil                                                     |
| Salgueiro, Pedro              | Manager in Science and Technology (Fellowship)        | University of Évora                                             | Portugal                                                   |
| Saliendra, Nicanor            | Ecologist                                             | USDA ARS                                                        | United States of America (the)                             |
| Salinas, María J.             | University professor                                  | University of Almería                                           | Spain                                                      |
| Salinger, Jim                 | Professor                                             | University of Florence                                          | Italy                                                      |
| Salino, Alexandre             | Full Professor/ Botany                                | Universidade Federal de Minas Gerais                            | Brazil                                                     |

|                             |                                                           |                                                                                                 |                                                            |
|-----------------------------|-----------------------------------------------------------|-------------------------------------------------------------------------------------------------|------------------------------------------------------------|
| Salisbury, Brian            | Retired scientist                                         |                                                                                                 | United States of America (the)                             |
| Salles, Luis                | PhD Candidate / Ecology                                   | Universidade Estadual de Campinas                                                               | Brazil                                                     |
| Salliou, Nicolas            | Postdoc                                                   | ETH Zürich                                                                                      | Switzerland                                                |
| Salmon, Yann                | University researcher                                     | University of Helsinki                                                                          | Finland                                                    |
| Salmon, Tristan             | Economist                                                 |                                                                                                 | Belgium                                                    |
| Salmon-Monviola, Jordy      | PhD, Engineer                                             | INRAE                                                                                           | France                                                     |
| Salmon-Mulanovich, Gabriela | Public Health                                             |                                                                                                 | Peru                                                       |
| Salmona, Jordi              | Research associate, Evolution                             | CNRS/ IRD/ University of Toulouse                                                               | France                                                     |
| Salo, Matti                 | Research Scientist                                        | Natural Resources Institute Finland                                                             | Finland                                                    |
| Salomidi, Maria             | Researcher                                                | Hellenic Centre for Marine Research                                                             | Greece                                                     |
| Saloña-Bordas, Marta        | Full Time Lecturer, Forensic Entomologist                 | University of the Basque Country                                                                | Spain                                                      |
| Salpeteur, Matthieu         | Researcher, anthropologist                                | IRD                                                                                             | France                                                     |
| Salvadó, Victoria           | Professor of Analytical Chemistry                         | Universitat de Girona <a href="http://udg.edu">udg.edu</a>                                      | Spain                                                      |
| Salvador, Gilberto          | PhD Student                                               | Universidade Federal do Pará                                                                    | Brazil                                                     |
| Salvador, Ricardo           | Director and Senior Scientist, Food & Environment Program | The Union of Concerned Scientists                                                               | United States of America (the)                             |
| SALVI, DANIELE              | ASSISTANT PROFESSOR                                       | University of L'Aquila                                                                          | Italy                                                      |
| Salvo, Adriana              | Principal Researcher Ecology Entomology                   | CONICET                                                                                         | Argentina                                                  |
| Salzmann, Sebastian         |                                                           | EAWAG                                                                                           | Switzerland                                                |
| Samani, Pouya               | Postdoctoral researcher                                   | Maastricht University                                                                           | Netherlands (the)                                          |
| Samelis, Vasileios          | Master's student                                          | Francis Crick Institute                                                                         | United Kingdom of Great Britain and Northern Ireland (the) |
| Samitier, Salvador          | Head of the Catalan Office for Climate Change / Chemistry | Generalitat de Catalunya                                                                        | Spain                                                      |
| Sampaio, Marta              | Biologist                                                 | CIBIO/InBIO University of Porto; STRIX Lda.                                                     | Portugal                                                   |
| Sample, James               | Research Scientist                                        | NIVA                                                                                            | Norway                                                     |
| Sampou, Peter               | PhD Oceanography                                          | Sturgis charter School                                                                          | United States of America (the)                             |
| Samson, Roeland             | Full professor in urban and environmental ecology         | University of Antwerp                                                                           | Belgium                                                    |
| Samson, Cheyenne            |                                                           | Green Heritage Fund Suriname                                                                    | Suriname                                                   |
| samuel, barreto             | phd student, biology                                      | Laboratoire de Biométrie et Biologie Évolutive (LBBE) —Laboratoire d'Écologie Microbienne (LEM) | France                                                     |
| Samuel, Marsha              | PhD Candidate in Environmental Science                    | University of Nottingham Malaysia Campus                                                        | Malaysia                                                   |
| Samuelsson, Karl            | PhD student, geospatial information science               | University of Gävle                                                                             | Sweden                                                     |
| Samways, Michael            | Distinguished Professor                                   | Stellenbosch University                                                                         | South Africa                                               |
| Samyn, Denis                | Glaciologist                                              | ICIMOD                                                                                          | Nepal                                                      |
| San Cristobal, Magali       | Senior scientist                                          | INRA                                                                                            | France                                                     |
| San Martín, Carmen          |                                                           | Centro Nacional de Biotecnología (CNB-CSIC)                                                     | Spain                                                      |
| Sana, Thibault              | Postdoctoral Researcher                                   | INRAE                                                                                           | France                                                     |
| Sanaphre Villanueva, Lucía  | Restoration ecology                                       | Global Change and Sustainability Centre                                                         | Mexico                                                     |
| Sanborn, Paul               | Associate Professor, Soil Science                         | University of Northern British Columbia                                                         | Canada                                                     |
| Sanchez, Andres             | phD student                                               | UNAM                                                                                            | Mexico                                                     |

|                                |                                                |                                                                                  |                                                            |
|--------------------------------|------------------------------------------------|----------------------------------------------------------------------------------|------------------------------------------------------------|
| Sanchez, Michele               | Plant conservation                             |                                                                                  | United Kingdom of Great Britain and Northern Ireland (the) |
| Sanchez, Pablo                 | Earth Sciences                                 | Universidad Austral                                                              | Chile                                                      |
| Sanchez, Lucile                | Postdoc fellow in Atomic Physics               | University of Otago                                                              | New Zealand                                                |
| Sanchez, Alfonso               | Political Ecologist                            | Loyola University                                                                | Spain                                                      |
| Sanchez, Juan Armando          | Professor, Biological Sciences                 | Universidad de los Andes                                                         | Colombia                                                   |
| Sánchez Barreiro, Fátima       | PhD student                                    | The Globe Institute, University of Copenhagen                                    | Denmark                                                    |
| Sanchez Gonzalez, Jorge R.     | Researcher in Freshwater Ecosystems            | Universitat de Lleida                                                            | Spain                                                      |
| Sánchez González, Jorge Rubén  | Researcher                                     | Sociedad Ibérica de Ictiología - Universitat de Lleida                           | Spain                                                      |
| Sanchez Meseguer, Andrea       | Postdoc                                        | Real Jardín Botánico Madrid (CSIC)                                               | Spain                                                      |
| Sánchez Navarro, Sonia         | Bat research                                   | Estación Biológica de Doñana                                                     | Spain                                                      |
| SANCHEZ PEREZ, José Miguel     | Research Director                              | CNRS                                                                             | France                                                     |
| Sanchez-Alonso, Sara           | Postdoctoral Associate                         | Haskins Laboratories & Yale University                                           | United States of America (the)                             |
| Sanchez-Díaz, Alberto          | Professor Assistant                            | Universidad de Cantabria                                                         | Spain                                                      |
| Sanchez-Donoso, Ines           | Postdoc on Evolutionary Biology                | Doñana Biological Station (Spanish National Research Council)                    | Spain                                                      |
| Sanchez-Escalante, Jose Jesus  | Herbario USON curator                          | Universidad de Sonora                                                            | Mexico                                                     |
| Sánchez-Fernández, David       | Ecology and conservation biology               | University of Murcia                                                             | Spain                                                      |
| Sanchez-Herranz, Antonio       | Biologist retired                              | Hospital Ramón y Cajal Madrid                                                    | Spain                                                      |
| Sánchez-Ruiz, Manuel           | Entomologist.                                  | Museo Nacional de Ciencias Naturales (MNCN-CSIC)                                 | Spain                                                      |
| Sánchez-Sáenz, Mauricio        | Associate professor/Biologist                  | National University of Colombia                                                  | Colombia                                                   |
| Sanchez-Salcedo, Javier        | Researcher/Astrophysics                        | Universidad Nacional Autónoma de México                                          | Mexico                                                     |
| Sanchez-Vialas, Alberto        | PhD evolutionary biology                       | National Museum of Natural Sciences, Madrid                                      | Spain                                                      |
| SÁNCHEZ-VICENTE, INMACULADA    | Postdoc researcher                             | University of Salamanca                                                          | Spain                                                      |
| Sanchez-Vila, Xavier           | Professor civil engineering                    | Universitat Politècnica de Catalunya                                             | Spain                                                      |
| Sandahl, Johan                 | Senior lecturer, Geography education           | Department of humanities and social sciences education, Stockholm University     | Sweden                                                     |
| Sandberg, Marie                | Associate Professor, European Ethnology        | University of Copenhagen                                                         | Denmark                                                    |
| Sandbrook, Richard             | Professor Emeritus of Political Science        | University of Toronto                                                            | Canada                                                     |
| Sander, Rolf                   | atmospheric chemistry                          | Max-Planck Institute of Chemistry                                                | Germany                                                    |
| SANDERS, Malcolm               | Postdoctoral researcher                        | Muséum national d'Histoire naturelle                                             | France                                                     |
| Sandhu, Deven                  | Executive Director                             | Biocule Inc                                                                      | Canada                                                     |
| Sandin, Gustav                 | Researcher, PhD Chemical Environmental Science | IVL Swedish Environmental Research Institute                                     | Sweden                                                     |
| Sandmeier, Ernst               | Energy Engineer                                | Hochschule Luzern, TEchnik & Architektur                                         | Switzerland                                                |
| Sándor, Attila D.              | Researcher, PI                                 | University of Agricultural Sciences and Veterinary Medicine                      | Romania                                                    |
| Sandoval Gil, JOSE MIGUEL      | RESEARCHER/PROFESSOR                           | UNIVERSITY OF BAJA CALIFORNIA                                                    | Mexico                                                     |
| Sandoval Salinas, Maria Leonor | Assistant Researcher and Professor - Biology   | National University of Tucumán - CONICET                                         | Argentina                                                  |
| Sandoval-Sierra, Jose Vladimir | Post-Doctoral Trainee                          | University of Tennessee Health Science Center, Department of Preventive Medicine | United States of America (the)                             |
| Sandoz, Jean-Christophe        | Research Director                              | CNRS - Evolution Genomes Behaviour and Ecology                                   | France                                                     |

|                                  |                                                                     |                                                                     |                                                            |
|----------------------------------|---------------------------------------------------------------------|---------------------------------------------------------------------|------------------------------------------------------------|
| Sandri, Marcus                   | Senior Consultant - Cardiology                                      | University of Leipzig - Heart Center                                | Germany                                                    |
| Sandstrom, Claes-Goran           | Chairman                                                            | Energy company                                                      | United Kingdom of Great Britain and Northern Ireland (the) |
| Sandu, Irina                     | Researcher - Conservation scientist                                 | Munchmuseet                                                         | Norway                                                     |
| Sanford, Robert                  | Ecological Sciences                                                 | Northern Arizona University                                         | United States of America (the)                             |
| Sang, Neil                       | Researcher, Geographical Information Science                        | Swedish University of Agricultural Science (SLU)                    | Sweden                                                     |
| Sanganyado, Edmond               | Associate Professor                                                 | Shantou University                                                  | China                                                      |
| Sangari, Félix J                 | Microbiology assistant professor                                    | University of Cantabria                                             | Spain                                                      |
| Sanger, Jennifer                 | Research Associate                                                  | University of Tasmania                                              | Australia                                                  |
| Sangster, George                 | Postdoc, Systematics                                                | Naturalis Biodiversity Center                                       | Netherlands (the)                                          |
| Sanguet, Arthur                  | PhD in biodiversity conservation                                    | University of Geneva                                                | Switzerland                                                |
| Sanguinetti, Michael             | Chemistry                                                           | Jacobs University Bremen                                            | Germany                                                    |
| Sanguinetti, Linn                | Scientific employee                                                 | University of Bremen                                                | Germany                                                    |
| Saniger, Jose M                  | Material Science Professor                                          | Universidad Nacional Autónoma de Mexico -UNAM                       | Mexico                                                     |
| Sankara Narayan, Abishek         | Doctoral Researcher, Water and Sanitation for Development           | Eawag - ETH Zurich                                                  | Switzerland                                                |
| SANT ANNA, PAULO AFRANIO         | PROFESSOR ASSOCIADO                                                 | UNIV. FEDERAL DOS VALES DO JEQUITINHONHA E MUCURI                   | Brazil                                                     |
| Santabarbara, Stefano            | Researcher                                                          | National Research Council                                           | Italy                                                      |
| Santamaria, Flavia               | Lecturer & Researcher                                               |                                                                     | Australia                                                  |
| Santamaria, Marta                | Research Intern                                                     | Technical University of Catalunya - Barcelona Tech                  | Spain                                                      |
| Santamaria Gomez, Angela Marcela | Biologist                                                           | Resnatur (Colombina Network of private natural reserves - Colombia) | Colombia                                                   |
| Santamaria Perez, Jorge          | PhD student                                                         | Universitat de Girona                                               | Spain                                                      |
| Santana, Quentin                 | Post doctoral research fellow                                       | University of Pretoria                                              | South Africa                                               |
| Santana, William                 | Professor of Zoology                                                | Universidade do Sagrado Coração                                     | Brazil                                                     |
| Santana, Diego                   | Zoology Professor                                                   | UFMS                                                                | Brazil                                                     |
| Santana, Flávia                  | Pos-doc researcher                                                  | Inpa                                                                | Brazil                                                     |
| Santana-Flores, Pablo            | marine science                                                      | Cinvestav-IPN                                                       | Mexico                                                     |
| Santander, Javier                | Assistant Professor                                                 | Memorial University of Newfoundland                                 | Canada                                                     |
| Santangeli, Andrea               | Post-doc researcher                                                 | University of Helsinki                                              | Finland                                                    |
| Santangelo, Marco                | Associate Professor of Geography                                    | Politecnico di Torino                                               | Italy                                                      |
| Santarém, Frederico              | PhD Student                                                         | CIBIO/InBIO-UP                                                      | Portugal                                                   |
| Santerne, Alexandre              | Astronomer                                                          | Aix-Marseille University                                            | France                                                     |
| Santesteban, Luis Gonzaga        | Head of Agronomy, Biotechnology and Food Science Department         | Universidad Pública de Navarra                                      | Spain                                                      |
| Santinelli, Veronica             | Phd student in Marine Ecology                                       | University of Palermo                                               | Italy                                                      |
| Santini, Nadia S.                | Research Fellow                                                     | Instituto de Ecología UNAM                                          | Mexico                                                     |
| Santo, Debora                    | Research Assistant in Plant genetics                                | BioSense Institute                                                  | Serbia                                                     |
| Santo, Andrea                    | Professor of Sciences                                               | Ministry of Education, University and Research                      | Italy                                                      |
| Santo, Anna                      | Institute for a Sustainable Environment, Faculty Research Assistant | University of Oregon                                                | United States of America (the)                             |

|                           |                                                                      |                                                      |                                                            |
|---------------------------|----------------------------------------------------------------------|------------------------------------------------------|------------------------------------------------------------|
| santos, leonor            | mathematics                                                          |                                                      | Portugal                                                   |
| Santos, Flavio            | Professor of Plant Ecology                                           | UNICAMP                                              | Brazil                                                     |
| Santos, Cinthya           | Msc in Ecology and Biodiversity Conservation                         |                                                      | Ecuador                                                    |
| Santos, Mário             | Molecular Microbiology                                               | University of Lisbon                                 | Portugal                                                   |
| Santos, Ana               | Ressearcher                                                          | CITAB-UTAD                                           | Portugal                                                   |
| Santos, Marcilio          | Physics                                                              | University Of Aberdeen                               | United Kingdom of Great Britain and Northern Ireland (the) |
| Santos, Joaquim           |                                                                      | Centre for Functional Ecology, University of Coimbra | Portugal                                                   |
| Santos, Eduardo           | Lecturer in Behavioural Ecology                                      | Universidade de São Paulo                            | Brazil                                                     |
| Santos, Xavier            | Researcher                                                           | CIBIO/ INBIO                                         | Portugal                                                   |
| Santos, Nuno              | post-doc researcher, wildlife disease ecology                        | CIBIO-InBIO, University of Porto                     | Portugal                                                   |
| Santos, Marcos            | Chemical Engineer - inspector coordinator                            |                                                      | Spain                                                      |
| Santos, Tiago             | professor                                                            | Universidade Federal do Pampa                        | Brazil                                                     |
| Santos, Teresa            | PhD student                                                          | University of Lisbon                                 | Portugal                                                   |
| Santos, Filipe Duarte     | Full professor geophysics, climate change science and sustainability | University of Lisbon                                 | Portugal                                                   |
| Santos, Diana             | Computer Science                                                     |                                                      | Norway                                                     |
| Santos, Carlos David      | Professor                                                            | Federal University of Pará                           | Brazil                                                     |
| Santos, Rui               | Associate Professor                                                  | University of Algarve / Center of Marine Sciences    | Portugal                                                   |
| Santos, Cristina          | Associate professor Biological Anthropology                          | Universitat Autònoma de Barcelona                    | Spain                                                      |
| Santos, Arturo            | Lecturer - Psychology of Sustainability                              | San Diego State University - Imperial Valley Campus  | United States of America (the)                             |
| Santos, Luís António      | Auxiliar Professor / Communication                                   | Universidade do Minho                                | Portugal                                                   |
| Santos-Granero, Fernando  | Senior Scientists // Social Anthropology                             | Smithsonian Tropical Research Institute              | Panama                                                     |
| Santschi, Peter           | Professor                                                            | Texas A&M University at Galveston                    | United States of America (the)                             |
| SANTUCCI, Pierre          | PostDoctoral Training Fellow                                         | The Francis Crick Institute                          | United Kingdom of Great Britain and Northern Ireland (the) |
| Santure, Anna             | School of Biological Sciences                                        | University of Auckland                               | New Zealand                                                |
| Sanuy Castells, Delfi     | Ph Doctor and Profesor                                               | Lleida universitay. Catalonia Spain.                 | Spain                                                      |
| Sanz, Nuria               | Dr Biologia                                                          | UdG                                                  | Spain                                                      |
| Sanz-Pérez, Ana           | PhD candidate                                                        | Forest Science Center of Catalonia                   | Spain                                                      |
| Sanz-Ros, Antonio Vicente | Researcher and technician                                            | IDEAGRO                                              | Spain                                                      |
| Sapinski, JP              | Assistant professor of Environmental Studies and Public Policy       | Université de Moncton                                | Canada                                                     |
| Sapir, Yuval              | Senior Lecturer and director of Botanic Garden                       | Tel Aviv University                                  | Israel                                                     |
| Saporito, Dafne           | PhD student                                                          | UNC                                                  | Argentina                                                  |
| Sarabian, Cécile          | Postdoctoral fellow in Primatology                                   | Kyoto University                                     | Japan                                                      |
| Sarah, Martinez           | marine biologist                                                     |                                                      | France                                                     |
| Saravia, Leonardo         | Professor/Researcher Ecology                                         | Universidad Nacional de General Sarmiento            | Argentina                                                  |
| Sardanyés, Josep          | Principal Investigator (Theoretical Biology)                         | Centre de Recerca Matemàtica                         | Spain                                                      |
| Sargent, Isabel           | Senior Researcher (Applied AI), Chartered Scientist                  |                                                      | United Kingdom of Great Britain and Northern Ireland (the) |
| Saric, Tomo               | Group Leader, Biomedicine                                            | Medical Faculty, University of Cologne               | Germany                                                    |

|                           |                                              |                                                                                                 |                                                            |
|---------------------------|----------------------------------------------|-------------------------------------------------------------------------------------------------|------------------------------------------------------------|
| Sarkar, Priyanka          | Doctoral student                             | Department of Ecology and Environmental Science, Assam University, Silchar-788011, INDIA        | India                                                      |
| Sarmento Afonso, Álvaro   | Integrated Researcher                        | Centre for Functional Ecology - Science for People & the Planet   Coimbra University - Portugal | Portugal                                                   |
| Sarmiento, Carolina       | Researcher - Microbial Ecology               |                                                                                                 | Colombia                                                   |
| Sarmiento, Carlos Eduardo | Associate professor                          | Instituto de Ciencias Naturales, Universidad Nacional de Colombia                               | Colombia                                                   |
| Sarmiento, Antonio        | Staff scientist                              | Universidad Nacional Autonoma de Mexico                                                         | Mexico                                                     |
| Sarmiento-Galan, Antonio  | Staff scientist                              | Universidad Nacional Autonoma de Mexico                                                         | Mexico                                                     |
| Sarrazin, François        | Professor of Ecology                         | Sorbonne Université                                                                             | France                                                     |
| Sarret, Geraldine         | Directrice de recherche CNRS                 | CNRS, Université Grenoble Alpes                                                                 | France                                                     |
| Sarron, Julien            | researcher                                   | CIRAD                                                                                           | France                                                     |
| SARTHOU, Jean-Pierre      | Full Professor of Agronomy-Agroecology       | University of Toulouse - Institut National Polytechnique de Toulouse                            | France                                                     |
| Sarvary, Joseph           | Deputy Director                              | Fundacion Para La Tierra                                                                        | Paraguay                                                   |
| SARVER, DALE              | Research Biologist                           | Kampachi Farms                                                                                  | United States of America (the)                             |
| SARVER, Ph.D., DALE       | Research Biologist                           | Kampachi Farms LLC                                                                              | United States of America (the)                             |
| Sasco, Annie J            | Medical cancer prevention epidemiologist     | Bordeaux University                                                                             | France                                                     |
| Sasidhar, Dr. K.          | Faculty Member                               | Acharya Nagarjuna University, Andhra Pradesh, India                                             | India                                                      |
| Sass, Nelson              | Professor, Department of Obstetrics          | UNIFESP - Universidade Federal de São Paulo                                                     | Brazil                                                     |
| Sassi, Paola              | Biology                                      | CONICET                                                                                         | Argentina                                                  |
| sassine, jad              | Molecular biology                            | Newcastle University                                                                            | United Kingdom of Great Britain and Northern Ireland (the) |
| SATNEY, ISABELLE          | Senior Scientist in Life Sciences            | INSERM                                                                                          | France                                                     |
| Sato, Chloe               | Research Fellow in Ecosystem Risk Assessment | Deakin University                                                                               | Australia                                                  |
| Satterfield, Dara         | Research Associate                           | Smithsonian Migratory Bird Center                                                               | United States of America (the)                             |
| Sattler, Tobias           | Researcher in atmospheric chemistry          | Max Planck Institute for Chemistry                                                              | Germany                                                    |
| Sattler, Thomas           | Director Monitoring Department               | Swiss Ornithological Institute                                                                  | Switzerland                                                |
| Satyajith, Aashish        | Research Scholar                             | Chennai Mathematical Institute                                                                  | India                                                      |
| Sauer, Ursula             | Scientist Biology                            | Austrian Institute of Technology                                                                | Austria                                                    |
| Sauerbrei, Willi          | Medical Biometry                             | Medical Center - University of Freiburg                                                         | Germany                                                    |
| Saulnier, Erwan           | Marine ecology                               | Agrocampus ouest                                                                                | France                                                     |
| Saulnier-Talbot, Emilie   | Aquatic Ecology                              | Université Laval                                                                                | Canada                                                     |
| sauma, tania              | PhD Physics, Geology Department              | Universidad Mayor                                                                               | Chile                                                      |
| Saunders, James           | Lecturer, Geology                            | University of New England                                                                       | Australia                                                  |
| Saunders, Alan            | Conservation biology                         | Waikato Regional Council                                                                        | New Zealand                                                |
| Saunders, Timothy         | Assistant Professor / Developmental biology  | National University of Singapore                                                                | Singapore                                                  |
| Saunders, Karen           | PhD Candidate, forest ecology, paleoecology  | Environmental Studies Program, Antioch University New England                                   | United States of America (the)                             |
| Sauvage, jean-francois    | Researcher astrophysics and instrumentation  | ONERA                                                                                           | France                                                     |
| Sauvage, Sébastien        | Researcher in Nanosciences/Physics           | CNRS - Centre National de la Recherche Scientifique                                             | France                                                     |

|                          |                                                                       |                                                                |                                                            |
|--------------------------|-----------------------------------------------------------------------|----------------------------------------------------------------|------------------------------------------------------------|
| Sauvage, Sabine          | Modelling in water resources and environmental sciences               | CNRS                                                           | France                                                     |
| sauvagnargues, sophie    | PR. teacher researcher                                                | IMT Mines Ales                                                 | France                                                     |
| Sauvain, Michel          | Director of Research                                                  | Institut de Recherche pour le Développement                    | France                                                     |
| Sauvard, Daniel          | Entomologist                                                          | INRA                                                           | France                                                     |
| Sauve, Drew              | PhD Student - Ecological and Evolutionary Responses to Climate Change | Queen's University                                             | Canada                                                     |
| Sauvion, Nicolas         | entomologist - senior researcher                                      | INRA                                                           | France                                                     |
| Savage, Rick             | President                                                             | Carolina Wetlands Association                                  | United States of America (the)                             |
| Savage, Melissa          | Associate Professor Emerita                                           | University of California Los Angeles                           | United States of America (the)                             |
| Savary, Romain           | Researcher on coral reef response to climate change                   | EPFL, Lausanne                                                 | Switzerland                                                |
| Savary, Paul             | PhD Student - Landscape genetics                                      | University of Bourgogne-Franche-Comté                          | France                                                     |
| Savi, Tadeja             | University Assistant / Post doc                                       | University of Natural Resources and Life Sciences Vienna, BOKU | Austria                                                    |
| Savic, Sara              |                                                                       | Scientific veterinary institute                                | Serbia                                                     |
| Savill, Charlotte        | Research Technician                                                   | University of Exeter                                           | United Kingdom of Great Britain and Northern Ireland (the) |
| Savli, Matic             | Post-Doc                                                              | Météo France, Centre National de Recherches Météorologiques    | France                                                     |
| Savolainen, Ville        | Physics                                                               | CSC - IT Center for Science                                    | Finland                                                    |
| Savvides, Andreas        | Research Fellow - Plant Ecophysiology                                 | Cyprus University of Technology                                | Cyprus                                                     |
| Savy, Mathilde           | Scientist in Nutrition                                                | Institut de Recherche pour le Développement                    | France                                                     |
| Sawyer, Gerald           | Professor (retired) of Archaeology                                    | CCSU                                                           | United States of America (the)                             |
| Saxby, Tracey            | Visual Science Communication Consultant (environmental science)       | Visual Science                                                 | Canada                                                     |
| Sayeg Michelazzo, Luan   | Oceanographer with focus on biogeochemistry                           | Instituto Oceanográfico da Universidade de São Paulo           | Brazil                                                     |
| Sayrany, Melody          | Masters                                                               | University of British Columbia                                 | Canada                                                     |
| Scabin, Andressa Barbara | P.h.D candidate                                                       | Universidade Federal do Rio Grande do Norte                    | Brazil                                                     |
| Scaccini, Davide         | PhD student, Entomology                                               |                                                                | Italy                                                      |
| Scandura, Massimo        | associate professor - Zoology                                         | University of Sassari                                          | Italy                                                      |
| Scao, Vincent            | Paleoclimate                                                          | CEA                                                            | France                                                     |
| Scapin, Giovanna         | Sr. Principal Scientist                                               | MSD                                                            | United States of America (the)                             |
| scapino, julie           | anthropology                                                          | université paris-est                                           | France                                                     |
| Scariot, Aldicir         | Researcher                                                            | Embrapa                                                        | Brazil                                                     |
| Scasso, Roberto Adrián   | Profesor                                                              | Universidad de Buenos Aires - CONICET                          | Argentina                                                  |
| Schaal, Gauthier         | Assistant professor in marine ecology                                 | Université de Bretagne Occidentale                             | France                                                     |
| Schäberle, Till          | Professor                                                             | Justus-Liebig-University of Giessen                            | Germany                                                    |
| Schade, Gunnar           | Atmospheric Sciences                                                  | Texas A&M University                                           | United States of America (the)                             |
| Schaefer, Hanno          | University Professor of Plant Biodiversity                            | Technical University of Munich                                 | Germany                                                    |
| Schaefer, Hinrich        | Research Scientist                                                    |                                                                | New Zealand                                                |
| Schaefer, Christina      | President, Landscape Ecologist                                        | Schaefer Ecological Solutions                                  | United States of America (the)                             |
| Schaeffer, Amandine      | Oceanographer                                                         |                                                                | Australia                                                  |

|                      |                                                        |                                                                               |                                |
|----------------------|--------------------------------------------------------|-------------------------------------------------------------------------------|--------------------------------|
| Schafer, Daniel      | Emeritus Professor of Statistics                       | Oregon State University                                                       | United States of America (the) |
| Schäfer, Marvin      | researcher/ Chemical Ecology                           | Museum für Naturkunde Berlin                                                  | Germany                        |
| Schäfer, Katrin      | Professor, Evolutionary Anthropology                   | University of Vienna                                                          | Austria                        |
| Schaffer, Alina      | Behavioral Ecology                                     | University of Leipzig                                                         | Germany                        |
| Schaffer, Janin      | PostDoc / Physical Oceanography of the Polar Seas      | Alfred Wegener Institute, Helmholtz Centre for Polar and Marine Research      | Germany                        |
| Schaffner, Urs       | Ecologist                                              | CABI                                                                          | Switzerland                    |
| Schafft, Malwina     | PhD student                                            | IGB                                                                           | Germany                        |
| Schaller, Stefan     | Medicine                                               | Technical University of Munich                                                | Germany                        |
| Scharf, Anne K.      | Movement Ecology                                       | Max Planck Institute of Animal Behavior                                       | Germany                        |
| Scharmann, Mathias   |                                                        | University of Lausanne                                                        | Switzerland                    |
| Schatz, George       | Curator                                                | Missouri Botanical Garden                                                     | United States of America (the) |
| Schau, John          | Electronics Engineering Technologist                   |                                                                               | Canada                         |
| Schauberger, Clemens | PhD Student                                            | University of Southern Denmark                                                | Denmark                        |
| Schaumburg, Federico | Researcher/Paper based microfluidics                   | INTEC, CONICET-UNL                                                            | Argentina                      |
| Schechter, Eric      | Professor Emeritus, Mathematics                        | Vanderbilt University                                                         | United States of America (the) |
| Scheelen, Lucie      | B.Sc. Landscape Ecology                                | University of Göttingen                                                       | Germany                        |
| Scheepens, J.F. Niek | Assistant Professor - Plant Evolutionary Ecology       | University of Tübingen                                                        | Germany                        |
| Scheer, Clemens      | Senior Researcher                                      | Karlsruhe Institute for Technology                                            | Germany                        |
| Scheffers, Dirk-Jan  | Associate Professor, molecular microbiology            | University of Groningen                                                       | Netherlands (the)              |
| Scheffler, Bernhard  | Senior Lecturer, Physicist, retired                    | University of Pretoria                                                        | South Africa                   |
| Scheiber, Isabella   | Academic Staff/ Behavioural Biology                    | The University of Vienna                                                      | Austria                        |
| Scheidegger, Andreas | Statistician in Aquatic Research                       | Eawag                                                                         | Switzerland                    |
| Scheidler, Alexander | Scientist                                              | Fraunhofer                                                                    | Germany                        |
| Schell, Jeffrey      | Oceanography Professor                                 | Sea Education Association                                                     | United States of America (the) |
| Schelling, Michael   | Research Assistant                                     | Ulm University - Institute for Media Informatics                              | Germany                        |
| Schelz, Charles      | Ecologist                                              |                                                                               | United States of America (the) |
| Schembri, Parick J.  | Professor of Biology                                   | University of Malta                                                           | Malta                          |
| Schenberg, Eduardo   | PhD, neuroscience researcher                           |                                                                               | Brazil                         |
| Schenk, Hanna        | Post-Doc                                               | German Centre for Integrative Biodiversity Research (iDiv) Halle-Jena-Leipzig | Germany                        |
| Schenk, Thomas       | Researcher (chargé de recherche)                       | Institut Jean Lamour                                                          | France                         |
| Scheper, Reiny       | Senior Scientist / Plant Pathology                     | The New Zealand Institute for Plant & Food Research Limited                   | New Zealand                    |
| Scherber, Christoph  | Professor of Animal Ecology                            | University of Münster                                                         | Germany                        |
| Scherer, Laura       | Assistant Professor                                    | Leiden University                                                             | Netherlands (the)              |
| Scherr, Sara         | Agriculture and Resource Economist, President and CEO  | EcoAgriculture Partners                                                       | United States of America (the) |
| Scherwath, Martin    | Senior Staff Scientist and Adjunct Assistant Professor | Ocean Networks Canada, University of Victoria                                 | Canada                         |
| Scheu, Stefan        | University Professor / Biology                         | University of Göttingen                                                       | Germany                        |
| Schianchi, Francesco | PhD research                                           | Maastricht University                                                         | Netherlands (the)              |

|                         |                                               |                                                              |                                                            |
|-------------------------|-----------------------------------------------|--------------------------------------------------------------|------------------------------------------------------------|
| Schiavini, Adrián       | Researcher in Applied Ecology                 | Consejo Nacional de Investigaciones Científicas y Técnicas   | Argentina                                                  |
| Schick, Lisa            | Student Physics                               | Georg-August-Universität Göttingen                           | Germany                                                    |
| Schick, Thomas          | Professor, Mathematics                        | University of Göttingen                                      | Germany                                                    |
| Schiele, Melissa        | PhD researcher                                | Loughborough University and the Zoological Society of London | United Kingdom of Great Britain and Northern Ireland (the) |
| Schild, Johanna         | Researcher in Landscape Ecology               | Wageningen University                                        | Netherlands (the)                                          |
| Schimp, Michael         | Astroparticle Physics                         | University of Wuppertal                                      | Germany                                                    |
| Schindler, Johannes     | PhD Climate Science, MSc Physics              |                                                              | Switzerland                                                |
| Schindler, David        | Killam Memorial Professor of Ecology Emeritus | University of Alberta                                        | Canada                                                     |
| Schlageter, Summer      | Wildlife Biologist                            | UC Davis                                                     | United States of America (the)                             |
| Schläpfer, Nina         | Marine Ecologist                              |                                                              | Switzerland                                                |
| Schlecker, Martin       | PhD student in Astrophysics                   | Max Planck Institute for Astronomy                           | Germany                                                    |
| Schleimer, Anna         | Marine Biology                                | University of St Andrews                                     | United Kingdom of Great Britain and Northern Ireland (the) |
| Schlenstedt, Stefan     | Astrophysics                                  |                                                              | Germany                                                    |
| Schleper, Christa       | Professor in Microbiology                     | University of Vienna                                         | Austria                                                    |
| Schlesinger, William H  | President, emeritus                           | Cary Institute of Ecosystem Studies                          | United States of America (the)                             |
| Schliephacke, Martin    | scientific employee/human genetics            | University of Giessen                                        | Germany                                                    |
| Schloegl, Christian     | Cognitive Biology                             | German Primate Center                                        | Germany                                                    |
| Schloegl, Brigitte      | Postdoctoral Researcher, Behavioural Ecology  | University of Leipzig                                        | Germany                                                    |
| Schlott, Anja           | PhD                                           | The Francis Crick Institute                                  | United Kingdom of Great Britain and Northern Ireland (the) |
| Schlupp, Ingo           | Professor                                     | University of Oklahoma                                       | United States of America (the)                             |
| Schluter, Dolph         | Professor                                     | The University of British Columbia                           | Canada                                                     |
| Schmeller, Dirk         | Professor for Functional Mountain Ecology     | Toulouse INP-ENSAT                                           | France                                                     |
| Schmid, Peter A.        | Prof. Dr.                                     | Hochschule Luzern - Departement Soziale Arbeit               | Switzerland                                                |
| Schmid, Sarah           | Biologist                                     | University of Lausanne                                       | Switzerland                                                |
| Schmidt, Tobias         | Life Science                                  | Reutlingen University                                        | Germany                                                    |
| Schmidt, Hannes         | Postdoc Ecosystem Science                     | University of Vienna                                         | Austria                                                    |
| Schmidt, Katy           | Cell Biology                                  | Med Uni Vienna                                               | Austria                                                    |
| Schmidt, John Paul      | Research Scientist, Ecology                   | University of Georgia                                        | United States of America (the)                             |
| Schmidt, Ulrich Wihelm  | Fisheries management expert/socioeconmist     | free lance consultant                                        | Cambodia                                                   |
| Schmidt, Garbi          | Professor, Cultural Encounters                | Roskilde University                                          | Denmark                                                    |
| Schmidt, Goran          | Wood Science                                  | University Hamburg                                           | Germany                                                    |
| Schmidt, Susanne        | Researcher                                    | Czech Academy for Sciences                                   | Czech Republic (the)                                       |
| Schmidt, Lena Katharina | Environmental Science                         | University of Potsdam                                        | Germany                                                    |
| Schmidt, JP             | Lecturer/Ecology                              | University of Georgia                                        | United States of America (the)                             |
| Schmidt, Jana           | Scientific Officer                            | Federal Environment Agency                                   | Germany                                                    |
| Schmied, Alexander      | Technical Assistanc in Conservation biology   | Waldrappteam                                                 | Austria                                                    |
| Schmiedel, Ute          | Scientist, Dryland rangelands                 | Universität Hamburg                                          | Germany                                                    |

|                                       |                                                      |                                                                               |                                                            |
|---------------------------------------|------------------------------------------------------|-------------------------------------------------------------------------------|------------------------------------------------------------|
| Schmitt Olabisi, Laura                | Associate Professor, Community Sustainability        | Michigan State University                                                     | United States of America (the)                             |
| Schmitz, Daniela                      | PhD in Botany/polar plant communities                | Universidade Federal de Viçosa                                                | Brazil                                                     |
| Schmoeller do Prado Rodrigues, Marina | PhD Student - Ecology                                | Universidade Federal do Rio de Janeiro                                        | Brazil                                                     |
| Schnabel, Kareen                      | Marine Biologist                                     |                                                                               | New Zealand                                                |
| Schnabel, Florian                     | Doctoral Researcher, Forest Sciences                 | German Centre for Integrative Biodiversity Research (iDiv) Halle-Jena-Leipzig | Germany                                                    |
| Schnecker, Jörg                       | Ecology                                              | University of Vienna                                                          | Austria                                                    |
| Schneider, Sebastian                  | Senior Research Fellow                               | Max-Planck-Institute for Research on Collective Goods                         | Germany                                                    |
| Schneider, Judith                     | Biologist                                            | University of Lausanne                                                        | Switzerland                                                |
| Schneider, Christoph                  | Full Professor, Geography                            | Geography Department, Humboldt-Universität zu Berlin                          | Germany                                                    |
| Schneider, Lisa                       | PhD Candidate Modelling of Marine Primary Production | Deltares                                                                      | Netherlands (the)                                          |
| Schneider, Eric                       | Research Associate, Marine Biology                   | Cape Eleuthera Institute                                                      | Bahamas (the)                                              |
| Schneider, Johannes                   | Atmospheric research, senior scientist               | Max Planck Institute for Chemistry                                            | Germany                                                    |
| Schneider, Antonia                    | Institute of Spatial Planning                        | Vienna University of Technology                                               | Austria                                                    |
| Schneider, Achim                      | Senior research fellow                               | University of Applied Sciences Lucerne                                        | Switzerland                                                |
| SCHNEIDER, David                      | Professor, Oceanography                              | Memorial University, St. John's                                               | Canada                                                     |
| Schnitzler, Franz-Rudolf              | Scientist/Entomology                                 |                                                                               | New Zealand                                                |
| Schnuelle, Christian                  | Researcher in Energy Systems                         | University of Bremen, Department Resilient Energy Systems                     | Germany                                                    |
| Schoellhamer, David                   | Hydrologist                                          | United States Geological Survey (retired)                                     | United States of America (the)                             |
| Schoenberg, Natalia                   | Marine Biologist                                     |                                                                               | United States of America (the)                             |
| Schoenenberger, Ursula                | Aquatic Science                                      | Eawag                                                                         | Switzerland                                                |
| Schoenenberger, Rene                  | Aquatic research                                     | Eawag                                                                         | Switzerland                                                |
| Schoenherr, Christoph                 | Environmental Physics                                | Scientists for Future                                                         | Germany                                                    |
| Schofield, Lucy                       | Geography Lecturer                                   | York St John University                                                       | United Kingdom of Great Britain and Northern Ireland (the) |
| Scholl, Michael                       | CEO                                                  | Save Our Seas Foundation                                                      | Switzerland                                                |
| Scholz, Michael                       | Head of EEG lab                                      | Technische Universität Berlin                                                 | Germany                                                    |
| Schön, Michael                        | postdoc, anatomy, neuroscience                       | Institute for Anatomy and Cell Biology, Ulm University                        | Germany                                                    |
| Schön, Daniele                        | Researcher in Neurosciences                          | CNRS, Inserm, AMU                                                             | France                                                     |
| Schöner, Michael                      | Head of Graduate Academy and University Didactics    | University of Greifswald                                                      | Germany                                                    |
| Schönitzer, Klaus                     | Apl. Professor                                       | Ludwigs-Maximilians-Universität München                                       | Germany                                                    |
| Schoonvaere, Karel                    | PhD student                                          | Ghent University                                                              | Belgium                                                    |
| SCHORLE, Katia                        | Ancient History and Archaeology                      | Nice                                                                          | France                                                     |
| Schradin, Carsten                     | Director of Research                                 | CNRS, IPHC-DEPE                                                               | France                                                     |
| Schrama, Maarten                      | Assistant Professor                                  | Leiden University                                                             | Netherlands (the)                                          |
| Schramski, John                       | Associate professor of engineering                   | University of Georgia                                                         | United States of America (the)                             |
| Schreel, Jeroen                       | PhD student                                          | Ghent University                                                              | Belgium                                                    |

|                           |                                                                                    |                                                                                                             |                                                            |
|---------------------------|------------------------------------------------------------------------------------|-------------------------------------------------------------------------------------------------------------|------------------------------------------------------------|
| Schreer, Viola            | Post-doc researcher in anthropology                                                | Department of Social and Political Sciences, Brunel University London                                       | Germany                                                    |
| Schreiber, Ingo           | Dipl. Chem. rer. nat                                                               | Aromatarius et Unguentarius                                                                                 | Germany                                                    |
| Schreiber, Elizabeth      | Ornithologist: retired                                                             | Los Angeles County Museum of Natural History                                                                | United States of America (the)                             |
| Schreier, Amy             | Associate Professor of Biology                                                     | Regis University                                                                                            | United States of America (the)                             |
| Schreiner, Matthias       | Geologist at retirement                                                            | Hessian state department of nature preservation environment and geology                                     | Germany                                                    |
| Schreiner, Benjamin       | Doctoral Student                                                                   | Institute for Environmental Physics                                                                         | Germany                                                    |
| Schreven, Kees            | PhD candidate                                                                      | Netherlands Institute of Ecology (NIOO-KNAW)                                                                | Netherlands (the)                                          |
| Schriever, Tiffany        | Assistant professor                                                                | Western Michigan University                                                                                 | United States of America (the)                             |
| Schrijvers-Gonlag, Marcel | PhD student in plant ecology                                                       | Inland Norway University of Applied Sciences                                                                | Norway                                                     |
| Schrödl, Michael          | Professor and curator, Zoology                                                     | SNSB - Bavarian State Collection of Zoology, LMU - Ludwig Maximilians Universität München, GeoBioCenter LMU | Germany                                                    |
| Schroeder, Frank          | Physics                                                                            | University of Delaware                                                                                      | United States of America (the)                             |
| Schroeder, Katrin         | Researcher -                                                                       | CNR-Istituto di Scienze Marine (ISMAR)                                                                      | Italy                                                      |
| Schroeder, Heike          | Professor of Environmental Governance                                              | University of East Anglia                                                                                   | United Kingdom of Great Britain and Northern Ireland (the) |
| Schroot, Zoë              | PhD Mathematics                                                                    | University of Amsterdam                                                                                     | Netherlands (the)                                          |
| Schrudde, Daniela         | Veterinarian / Program Director                                                    |                                                                                                             | Germany                                                    |
| Schtickzelle, Nicolas     | Professor of Ecology and Conservation Biology                                      | Université catholique de Louvain                                                                            | Belgium                                                    |
| Schubert, Sven            | Professor for Plant Nutrition                                                      | Justus Liebig University Giessen                                                                            | Germany                                                    |
| Schubert, Philipp         | Marine Biologist                                                                   | GEOMAR - Helmholtz Center for Ocean Research Kiel                                                           | Germany                                                    |
| Schubert, Nadine          | Marine Researcher                                                                  | Center of Marine Sciences (CCMAR)                                                                           | Portugal                                                   |
| Schuck, Götz              | Structure and Dynamics of Energy Materials                                         | Helmholtz Centre Berlin for Materials and Energy                                                            | Germany                                                    |
| Schuerz, Florian          | Environmental Science                                                              | eawag                                                                                                       | Switzerland                                                |
| Schuessler, Steffen       | Technician                                                                         | MPI of Biochemistry                                                                                         | Germany                                                    |
| Schug, Hannah             | PhD Environmental Toxicologist                                                     | Eawag                                                                                                       | Switzerland                                                |
| Schug, Malcolm            | Associate Professor of Biology                                                     | University of North Carolina Greensboro                                                                     | United States of America (the)                             |
| Schuh, Matheus            | PhD Candidate                                                                      | Verimag                                                                                                     | France                                                     |
| Schuler, Reiner           | Forester                                                                           | retired                                                                                                     | Australia                                                  |
| Schuler, Douglas          | Professor emeritus, computer science                                               | The Evergreen State College                                                                                 | United States of America (the)                             |
| Schulman, Leif            | Director, Professor, Biodiversity Science                                          | Finnish Museum of Natural History LUOMUS, University of Helsinki                                            | Finland                                                    |
| Schulte, Sven             | NGO Project Director/ MA Environmental Security (UN-mandated University for Peace) | Various                                                                                                     | Germany                                                    |
| Schulte, Sonja            | Organic Geochemistry                                                               |                                                                                                             | Germany                                                    |
| Schulz, Christiane        | PostDoc, Atmospheric Sciences                                                      | Max Planck Institute for Chemistry; Leibniz Institute for Tropospheric Research                             | Germany                                                    |
| Schulz, Robert Simon      |                                                                                    | Federal Institute of Hydrology                                                                              | Germany                                                    |
| Schulz, Christof          | Professor                                                                          | Institute for Combustion and Gas Dynamics, University of Duisburg-Essen                                     | Germany                                                    |

|                          |                                                        |                                                                     |                                                            |
|--------------------------|--------------------------------------------------------|---------------------------------------------------------------------|------------------------------------------------------------|
| Schulz, Karsten          | Assistant Professor of Political Science               | University of Groningen                                             | Netherlands (the)                                          |
| Schulze, Jonathan        | M.Sc. in Renewable Energies                            | Beuth Hochschule für Technik Berlin                                 | Germany                                                    |
| Schulzke, Carola         | Professor/Chair of Bioinorganic Chemistry              | Universitaet Greifswald                                             | Germany                                                    |
| Schumacher, Paul         | Prof, Computer Science                                 | Winona State University                                             | United States of America (the)                             |
| schumann, susann         | gp                                                     | hausarztpraxis im kunkerkiez, berlin                                | Germany                                                    |
| Schure, K.M              | Researcher Energy                                      | PBL                                                                 | Netherlands (the)                                          |
| Schure, Jolien           | Associate, Social Science                              | CIFOR                                                               | Sweden                                                     |
| Schüßler, Christina      | PhD Student                                            | Staatliches Museum für Naturkunde Stuttgart                         | Germany                                                    |
| Schuster, William J.     | Full Profesor -Astronomy                               | Institute of Astronomy, UNAM                                        | Mexico                                                     |
| Schuster, Richard        | Liber Ero Postdoctoral Fellow                          | Carleton University                                                 | Canada                                                     |
| Schütte, Stefanie        | Researcher, Hydrology                                  | University of KwaZulu-Natal                                         | South Africa                                               |
| Schütze, Nora            |                                                        | University of Kassel                                                | Germany                                                    |
| Schutzman, Corry         | Environmental Biology                                  | SUNY college of Environmental Science and Forestry                  | United States of America (the)                             |
| Schuv, Malcolm           | Associate Professor of Biology                         | University of North Carolina Greensboro                             | United States of America (the)                             |
| SCHWABL, HUBERT          | PROFESSOR OF BIOLOGY                                   | WASHINGTON STATE UNIVERSITY                                         | United States of America (the)                             |
| Schwager, Kathy          | Ecologist                                              |                                                                     | United States of America (the)                             |
| Schwander, Tanja         | Professor - Evolution                                  | University of Lausanne                                              | Switzerland                                                |
| Schwantes, Ulrich        | Prof. Dr. med., General Practitioner                   | Institute for General Practice, MEDizinische Hochschule Brandenburg | Germany                                                    |
| Schwartz, Orlando        | Ecology of animals                                     | Retired professor                                                   | United States of America (the)                             |
| Schwartz, Christophe     | Professor - urban soil sciences                        | Université de Lorraine                                              | France                                                     |
| Schwarz, Jana            | PhD, Agricultural Economics                            | KU Leuven                                                           | Belgium                                                    |
| Schwarz, Abby            | Tenured Instructor, Faculty of Biology                 | Langara College (ret'd)                                             | Canada                                                     |
| Schwarz, Julia           | Postdoctoral researcher in Forest sciences             | University of Freiburg                                              | Germany                                                    |
| Schwarz, Jill            | Lecturer, Marine Remote Sensing                        | University of Plymouth                                              | United Kingdom of Great Britain and Northern Ireland (the) |
| Schwarzbach, Erik        | Researcher, Plant genetics and breeding, biostatistics | retired                                                             | Czech Republic (the)                                       |
| Schwarzer, Julia         | Junior group leader                                    | Museum Alexander Koenig Bonn                                        | Germany                                                    |
| Schwegmann, Sebastian    | Phd-Student, Environmental Science                     | Albert-Ludwigs Universität Freiburg                                 | Germany                                                    |
| Schweiger, Brittany      | Wildlife Science Graduate Student                      | New Mexico State University                                         | United States of America (the)                             |
| Schweigkofler, Wolfgang  | Research Associate Professor Plant Pathology           | Dominican University of California                                  | United States of America (the)                             |
| Schweinfurth, Manon      | Lecturer                                               | University of St Andrews                                            | United Kingdom of Great Britain and Northern Ireland (the) |
| Schweinsberg, Maximilian | Post Doc                                               | Animal Ecology, Evolution and Biodiversity Ruhr University Bochum   | Germany                                                    |
| Schweithelm, James       | Geographer/Tropical Forests Governance Expert          | Forest Mountain Services                                            | United States of America (the)                             |
| Schweitzer, Alejandro    | Reserarcher in political ecology                       | CONICET                                                             | Argentina                                                  |
| Schweizer, Daniella      | Postdoc                                                | ETH                                                                 | Switzerland                                                |
| Schwendenmann, Luitgard  |                                                        | School of Environment, University of Auckland                       | New Zealand                                                |
| Schwensow, Nina          | Biologist                                              | University of Ulm                                                   | Germany                                                    |
| Schwieder, Marcel        | Researcher (PHD)                                       | Humboldt-Universität zu Berlin                                      | Germany                                                    |

|                     |                                                         |                                                                                      |                                                            |
|---------------------|---------------------------------------------------------|--------------------------------------------------------------------------------------|------------------------------------------------------------|
| Schwientek, Marc    | Research Assistant, Hydrology                           | Center of Applied Geoscience, University of Tuebingen                                | Germany                                                    |
| Schwitalla, Jan     | Microbiology                                            |                                                                                      | Germany                                                    |
| Schwonbeck, Susanne | Senior Risk Assessor                                    | Fraunhofer Institute for Toxicology and Experimental Medicine                        | Germany                                                    |
| Scollay, Roland     | Professor                                               | University of Melbourne                                                              | Australia                                                  |
| Scott, Shaunna      | Sociology (Associate Professor)                         | University of Kentucky                                                               | United States of America (the)                             |
| Scott, Terence      | Senior Teaching Fellow                                  | University of Otago                                                                  | New Zealand                                                |
| Scott, Nicholas     | Lead Research Scientist, Astronomy                      |                                                                                      | United States of America (the)                             |
| Scott, Alexander    | Research and Development Technologist                   | Heathcoat Fabrics Limited                                                            | United Kingdom of Great Britain and Northern Ireland (the) |
| Scott, Glenda       | Forester                                                | US Forest #ervice (retired)                                                          | United States of America (the)                             |
| Scott, Alyssa       | Cetacean Acoustician                                    | National Oceanic & Atmospheric Administration                                        | United States of America (the)                             |
| Scott, Monique      | PhD Student - Cell Biology                              | University of Edinburgh                                                              | United Kingdom of Great Britain and Northern Ireland (the) |
| Scotti, Ivan        | Senior scientist, forest ecology / evolutionary biology | INRA                                                                                 | France                                                     |
| Scotti, Alberto     | Freshwater Ecology                                      | Eurac Research                                                                       | Italy                                                      |
| Scow, Kate          | Professor Soil Science                                  | UC Davis                                                                             | United States of America (the)                             |
| sculfort, ombeline  | DOCTOR BIOCHEMISTRY                                     | CNRS                                                                                 | France                                                     |
| Scullion, Jason     | Assistant Professor of Environmental Studies            | McDaniel College                                                                     | United States of America (the)                             |
| Seaborn, Travis     | NSF Research Fellow                                     | University of Idaho                                                                  | United States of America (the)                             |
| Seabra, Sofia       | Researcher - Biology                                    | Faculty of Sciences, University of Lisbon                                            | Portugal                                                   |
| Seah, Samantha      | PhD Student                                             | EMBL Heidelberg                                                                      | Germany                                                    |
| Seal, Alan          | Plant Breeder                                           |                                                                                      | New Zealand                                                |
| Searle, Josephine   | Supervising hydrogeologist                              | Department of Water and Environmental Regulation, Western Australai                  | Australia                                                  |
| Sears, Kenneth      | Civil Engineering                                       | Carnegie Mellon University                                                           | United States of America (the)                             |
| Seastedt, Tim       | Professor emeritus, EBIO and Senior Fellow, INSTAAR     | University of Colorado, Boulder                                                      | United States of America (the)                             |
| Seavey, Matthew     | Scientist                                               | Heat Biologics, Inc.                                                                 | United States of America (the)                             |
| Sebbenn, Alexandre  | Prfoessor doctor in Forest Genetics                     | Sao Paulo Forestr Institute                                                          | Brazil                                                     |
| Séchaud, Robin      | Phd student in Biology/Ecology                          | Lausanne University, Department of Ecology and Evolution                             | Switzerland                                                |
| Sedda, Luigi        | Lecturer in Spatial Epidemiology                        | Lancaster University                                                                 | United Kingdom of Great Britain and Northern Ireland (the) |
| Sedlon, Pavel       | Cardiologist                                            | Central Military Hospital Prague                                                     | Czech Republic (the)                                       |
| Sedmáková, Denisa   | researcher                                              | Technical University in Zvolen                                                       | Slovakia                                                   |
| Seeger, Danielle    | Bioprocess engineering                                  | University of Cape Town                                                              | South Africa                                               |
| Seehausen, Ole      | Professor / Ecology & Evolution                         | University of Bern + Eawag, Swiss Federal Institute for Aquatic Science & Technology | Switzerland                                                |
| Seelig, Frederik    | Medical Entomology                                      | London School of Hygiene & Tropical Medicine                                         | United Kingdom of Great Britain and Northern Ireland (the) |
| Seely, Mary         | Board Member and Previous Director                      | Desert Research Foundation of Namibia                                                | Namibia                                                    |

|                                |                                                                             |                                                                                                          |                                                            |
|--------------------------------|-----------------------------------------------------------------------------|----------------------------------------------------------------------------------------------------------|------------------------------------------------------------|
| Seery, Marianne                | Biochemistry Graduate                                                       | University College Dublin                                                                                | New Zealand                                                |
| Segami, Carolina               | PhD student in evolutionary biologist                                       | Uppsala University                                                                                       | Peru                                                       |
| Segecova, Anna                 | Research Associate, Biologist                                               | University of Technology Sydney, Climate Change Cluster                                                  | Australia                                                  |
| Segelbacher, Gernot            | Professor                                                                   | University Freiburg                                                                                      | Germany                                                    |
| Seger, Maud                    | Soil science                                                                | Inra                                                                                                     | France                                                     |
| Segers, Jan                    |                                                                             | University of Antwerp                                                                                    | Belgium                                                    |
| Segers, Hendrik                |                                                                             | Royal Belgian Institute of Natural Sciences                                                              | Belgium                                                    |
| Segers, Philippe               | Head of European High-Performance Computing projects. Atmospheric Physicist | GENCI                                                                                                    | France                                                     |
| Seghieri, Josiane              | Research Director, Functional Ecology & Agroforestry in West Africa         | Institut de Recherche pour le Développement (IRD, French Research Institute for Sustainable Development) | France                                                     |
| Segner, Helmut                 | Professor/Veterinary Sciences                                               | University of Bern                                                                                       | Switzerland                                                |
| Segnon, Alcade                 | PhD Candidate / Agricultural & Environmental Sciences                       |                                                                                                          | Benin                                                      |
| Segovia-Salcedo, María Claudia | Associate Professor                                                         | Universidad de las Fuerzas Armadas - ESPE                                                                | Ecuador                                                    |
| Segur, Miguel                  | Senior Consultant                                                           | CAF                                                                                                      | Chile                                                      |
| Segura, Isis Angélica          | PhD student                                                                 | UNIFESP                                                                                                  | Brazil                                                     |
| Séguet, Alice                  | Postdoctoral researcher                                                     | Westfälische Wilhelms-Universität Münster                                                                | Germany                                                    |
| Seidel, Jean Luc               | Senior Researcher                                                           | CNRS                                                                                                     | France                                                     |
| Seidl, Amy                     | Senior Lecturer                                                             | University of Vermont                                                                                    | United States of America (the)                             |
| seidler, ramon                 | microbiology, senior research scientist                                     | oregon state univ. professor; senior research scientist US EPA                                           | United States of America (the)                             |
| Seidler, Dr. Ramon             | microbiology, senior research scientist US EPA, retired                     | oregon state univ. professor; senior research scientist US EPA                                           | United States of America (the)                             |
| Seipel, Katja                  | Biomedical research scientist                                               | University of Bern                                                                                       | Switzerland                                                |
| Seitsonen, Oula                | Postdoctoral researcher, archaeology                                        | University of Oulu / University of Helsinki                                                              | Finland                                                    |
| Seitz, Julia                   | Post Doc Social Sciences                                                    | Johannes Gutenberg University Mainz                                                                      | Germany                                                    |
| Seitz, Philine                 | Medical Doctor                                                              | Hospital                                                                                                 | Germany                                                    |
| Seixas, Cristiana              | Academic Researcher                                                         | University of Campinas                                                                                   | Brazil                                                     |
| Sekonya, James George          | Doctoral Researcher - Environmental and Geographical Sciences               | University of Cape Town                                                                                  | South Africa                                               |
| Selden, Michael                | CEO & Biochemist                                                            | Finless Foods                                                                                            | United States of America (the)                             |
| Sellanes, Javier               | Professor / Deep sea and seamount benthic ecology                           | Universidad Catolica del Norte                                                                           | Chile                                                      |
| Sellars, Jonathan              | Lecturer in Medicinal Chemistry                                             | Newcastle University                                                                                     | United Kingdom of Great Britain and Northern Ireland (the) |
| Selle, Benny                   | Professor of Hydrology                                                      | Beuth University Of Applied Science Berlin                                                               | Germany                                                    |
| Sellenriek, Elisabeth          | PhD Ecology                                                                 | UFZ - Centre for Environmental Research                                                                  | Germany                                                    |
| Selling, Jörn                  | Biologist                                                                   | firmm.org                                                                                                | Spain                                                      |
| Selmeczy, Géza                 |                                                                             | University of Pannonia                                                                                   | Hungary                                                    |
| Selsis, Franck                 | Researcher - astrophysics                                                   | CNRS                                                                                                     | France                                                     |

|                                |                                                                    |                                                                          |                                    |
|--------------------------------|--------------------------------------------------------------------|--------------------------------------------------------------------------|------------------------------------|
| Selva Fernandez, Nuria         | Associate Professor, ecology                                       | Institute of Nature Conservation Polish Academy of Sciences              | Poland                             |
| Selvais, Arnaud                | Sciences teacher in High School                                    | Second'Air                                                               | Belgium                            |
| Selz, Oliver                   | Postdoc                                                            | EAWAG                                                                    | Switzerland                        |
| Semensatto, Décio              | Associate Professor                                                | Universidade Federal de São Paulo                                        | Brazil                             |
| Sementchoukova, Irina          | MSc Candidate                                                      | Queen's University                                                       | Canada                             |
| Semenza, Jan C.                | Public Health                                                      | Stockholm Environmental Institute                                        | Sweden                             |
| Semmouri, Ilias                | Academic Assistant - PhD candidate in Applied Biological Sciences  | UGent                                                                    | Belgium                            |
| Semper-Pascual, Asunción       | PhD student                                                        | Humboldt-Universität zu Berlin                                           | Germany                            |
| Sempere-Torres, Daniel         | Director of centre of Applied Research in Hydrometeorology (CRAHI) | Universitat Politècnica de Catalunya - Barcelonatech (UPC)               | Spain                              |
| Senar, Juan Carlos             | Head of Research                                                   | Museu de Ciències Naturals de Barcelona                                  | Spain                              |
| Señaris, Celsa                 | Associated Researcher, Herpetology                                 | PROVITA                                                                  | Venezuela (Bolivarian Republic of) |
| Senay, Senait                  | Assistant Professor                                                | University of Minnesota                                                  | United States of America (the)     |
| Senecah, Susan                 | Professor Emerita, Environmental Studies                           | State University of New York College of Environmental Science & Forestry | United States of America (the)     |
| Senese, Andrea                 | Zoologist                                                          |                                                                          | Italy                              |
| Senior, John                   | Postdoctoral researcher                                            | Swedish University of Agricultural Sciences                              | Sweden                             |
| Senkondo, Neema                | Assistant lecturer                                                 | University of Dodoma                                                     | Tanzania, United Republic of       |
| Senta, Ivan                    | Senior Research Associate / Environmental Chemistry                | Rudjer Boskovic Institute                                                | Croatia                            |
| sentchilo, vladimir            | Senior researcher                                                  | University of Lausanne                                                   | Switzerland                        |
| Sentinella, Alexander          | Macroecology and evolutionary ecology                              | UNSW Sydney                                                              | Australia                          |
| Seoane Blanco, Mateo           | PhD candidate                                                      | Centro Nacional de Biotecnología                                         | Spain                              |
| Sepplet, Ralf                  | Professor for Landscape Ecology                                    | Helmholtz Centre for Environmental Research                              | Germany                            |
| Sepulveda Chaverra, Juan David | PhD in sustainable development                                     | Fundación Enerstud para la sostenibilidad e innovación                   | Colombia                           |
| Sequeira, Miguel               | Professor Botany & Ecology                                         | University of Madeira                                                    | Portugal                           |
| Seraphim, Noemy                | Professor of Biology                                               | Instituto de Educação Ciência e Tecnologia de São Paulo                  | Brazil                             |
| Serca, Dominique               | Assistant Professor                                                | Laboratoire d'Aérologie, UMS CNRS-UPS, Université de Toulouse            | France                             |
| Serén, Nina                    | PhD student / Biological Sciences                                  | CIBIO-InBIO Porto University of Sciences                                 | Portugal                           |
| Sereni, Laura                  | PhD student                                                        | INRA-ENS                                                                 | France                             |
| Seress, Gábor                  | Post doc research fellow / Ecology, Behavioural Ecology            | University of Pannonia                                                   | Hungary                            |
| Sergeant, Anne-Sophie          | researcher in forest ecology                                       | CONICET-INTA                                                             | Argentina                          |
| Sergeyev, Maksim               | Research Assistant                                                 | Texas A&M University - Kingsville                                        | United States of America (the)     |
| Sergio, Fabrizio               | Researcher / ecology                                               | Estación Biológica de Doñana - CSIC                                      | Spain                              |
| Serino, Dominic                | Conservation Biology                                               | Audubon Maryland-DC                                                      | United States of America (the)     |
| Seror, Marta                   | Outreach coordinator                                               | IFCA                                                                     | Spain                              |
| Seroude, Laurent               | Associate-Professor Biology                                        | Queen's University                                                       | Canada                             |

|                      |                                                                   |                                                                                                                 |                                                               |
|----------------------|-------------------------------------------------------------------|-----------------------------------------------------------------------------------------------------------------|---------------------------------------------------------------|
| Serpa, Dalila        | Researcher                                                        | Centre for Environmental and Marine Studies,<br>Department of Environment and Planning, University<br>of Aveiro | Portugal                                                      |
| Serra, Lorenzo       | Senior Researcher Ornithology                                     | Istituto Superiore per la Protezione e Ricerca<br>Ambientale                                                    | Italy                                                         |
| Serra, Gianluca      | Ecologist and biologist                                           | freelance                                                                                                       | Italy                                                         |
| SERRADILLA, GARCIA   | PHD/VIROLOGY                                                      | CNB-CSIC                                                                                                        | Spain                                                         |
| Serralheiro, Ricardo | Professor and Researcher, emeritus                                | MED-Mediterranean Institute for Agriculture,<br>Environment and Development-University of Évora                 | Portugal                                                      |
| Serranito, Bruno     | PhD Ecology and marine biology                                    | Université de Limoges                                                                                           | France                                                        |
| Serrano, David       | Tenure scientific, ecology                                        | EBD-CSIC                                                                                                        | Spain                                                         |
| Serrano, Mario       | Associate Professor                                               | Center for Genome Sciences, UNAM                                                                                | Mexico                                                        |
| Serrano, Daniela     | Phd candidate                                                     | Cide                                                                                                            | Mexico                                                        |
| Serrano-Saiz, Esther | Principal Investigator. Development and Neuroscience              | CBMSO-CSIC                                                                                                      | Spain                                                         |
| SERRE, Guy           | Professor of Cell Biology                                         | Toulouse University                                                                                             | France                                                        |
| Serres, Coline       | PhD Student in Management Science                                 | Université libre de Bruxelles                                                                                   | Belgium                                                       |
| Serret, Pablo        | Associate Professor Ecology / Oceanography                        | University of Vigo                                                                                              | Spain                                                         |
| Serret, Hortense     | Postdoc researcher, Ecology                                       | Ewha Womans University                                                                                          | Korea (the Republic of)                                       |
| Sérsic, Alicia       | Scientific researcher                                             | Instituto multidisciplinario de biología vegetal                                                                | Argentina                                                     |
| Servedio, Maria      | Professor of Biology                                              | University of North Carolina, Chapel Hill                                                                       | United States of America (the)                                |
| Seuntjens, Eve       | Professor of Biology                                              | KU Leuven                                                                                                       | Belgium                                                       |
| Séverin, Pistre      | Professor of University                                           | Montpellier University                                                                                          | France                                                        |
| Sevestre, Heidi      | Glaciology                                                        | St Andrews University                                                                                           | United Kingdom of Great Britain<br>and Northern Ireland (the) |
| Sévigny, Marcel      | Ph. D. Candidate (student)                                        | Université Laval                                                                                                | Canada                                                        |
| Sevink, Sevink       | Emeritus Full Professor in Physical Geography and<br>Soil Science | University of Amsterdam, Institute for Biodiversity<br>and Ecosystem Dynamics                                   | Netherlands (the)                                             |
| SEYLER, Patrick      | Headmaster of Hydrosclnces Lab. Montpellier, France               | IRD                                                                                                             | France                                                        |
| Seymour, Colleen     | Ecologist                                                         | South African National Biodiversity Institute                                                                   | South Africa                                                  |
| Sfair, Julia         | Visiting Professor                                                | Universidade Federal do Ceará                                                                                   | Brazil                                                        |
| Sforzi, Andrea       | Director                                                          | Maremma Natural History Museum                                                                                  | Italy                                                         |
| Sgolastra, Fabio     | Assistant professor in Applied Entomology                         | University of Bologna                                                                                           | Italy                                                         |
| Shabalin, Ivan       | Research Scientist, Biophysics                                    | University of Virginia                                                                                          | United States of America (the)                                |
| Shacham, Boaz        | Manager of Herpetological Collection                              | National Natural History Collections, The Hebrew<br>University of Jerusalem                                     | Israel                                                        |
| Shackelford, Nancy   |                                                                   | Colorado University at Boulder                                                                                  | United States of America (the)                                |
| Shackleton, Sheona   | Climate and Development                                           | Univ of Cape Town                                                                                               | South Africa                                                  |
| Shackleton, Charlie  | Environmental scientist                                           | Rhodes University                                                                                               | South Africa                                                  |
| shackley, tilly      | PhD Student                                                       | Imperial College London                                                                                         | United Kingdom of Great Britain<br>and Northern Ireland (the) |
| Shadkam, Somayeh     | Senior Scientist                                                  | Geothe University                                                                                               | Germany                                                       |
| Shadrack, Andy       | Agriculture/Political Science                                     | Retired                                                                                                         | Canada                                                        |

|                        |                                                         |                                                       |                                                            |
|------------------------|---------------------------------------------------------|-------------------------------------------------------|------------------------------------------------------------|
| Shafer, Craig          | Conservation Biologist                                  | George Wright Society                                 | United States of America (the)                             |
| Shafir, Sharoni        | Professor of Entomology                                 | The Hebrew University of Jerusalem                    | Israel                                                     |
| Shah, Poonam           | PhD Student                                             | University of Warwick                                 | United Kingdom of Great Britain and Northern Ireland (the) |
| Shah, Aisha            | Medical Doctor                                          | National health service                               | United Kingdom of Great Britain and Northern Ireland (the) |
| Shahsavar, Azadeh      |                                                         | Aarhus University                                     | Denmark                                                    |
| Shahyar, Mohammad Reza | MD. Surgeon                                             |                                                       | Germany                                                    |
| Shake, Corey           | Wildlife Biologist                                      |                                                       | United States of America (the)                             |
| Shakou, Louisa Marie   | Risk Assessment                                         | University of Antwerp                                 | Belgium                                                    |
| SHAMBROOK, KEVIN       | PH.D ENGINEERING                                        | RETIRED                                               | United States of America (the)                             |
| Shamimi, Leili         | Research scientists                                     |                                                       | Australia                                                  |
| Shanee, Sam            | Projects Director                                       | Neotropical Primate Conservation                      | Peru                                                       |
| Shangguan, Wei         | Associate professor                                     | Sun Yat-sen University                                | China                                                      |
| Shank, Genevieve       | Wildlife Biologist                                      |                                                       | United States of America (the)                             |
| Shankar, Shiva         | Professor, Applied Mathematics                          | Chennai Mathematical Institute                        | India                                                      |
| Shannon, Caitlyn       | MSc student in Marine Biology                           | Victoria University of Wellington                     | New Zealand                                                |
| Shannon, Joe           | Adjunct Professor                                       | Northern AZ University                                | United States of America (the)                             |
| Shapiro, Gary          | President of Environmental NGO                          | Orang Utan Republik Foundation, Inc.                  | United States of America (the)                             |
| Shapiro, Robert        | Simulation Models and Business Processes                | Town of Wellfleet Energy and Climate Committee        | United States of America (the)                             |
| Sharma, Richa          | Research Scientist                                      | Public Health Foundation of India                     | India                                                      |
| Sharma, Gyan Prakash   | Assistant Professor                                     | University of Delhi, Delhi                            | India                                                      |
| Sharma, Vivek          | Biotechnology                                           |                                                       | India                                                      |
| Sharma, Dhruvaraj      | PhD Student                                             | QUT                                                   | Australia                                                  |
| Sharma, Akanksha       | Doctoral Student - Integrative Conservation and Ecology | Odum School of Ecology, University of Georgia         | India                                                      |
| Sharp, Joanna          | Agricultural systems modelling                          | The New Zealand Institute for Plant and Food Research | New Zealand                                                |
| Sharp, Carly           | Civil Engineering                                       | University of Michigan                                | United States of America (the)                             |
| Sharp, Sean            | Postdoctoral fellow                                     | University of Michigan                                | United States of America (the)                             |
| Sharp, Geoffrey        | Bsc. Environmental Geoscience                           | Acadia University                                     | Canada                                                     |
| Sharpe, Lisa           | Health Science BSc & Science PGCE QTS                   | Kings College London & University of Exeter           | United Kingdom of Great Britain and Northern Ireland (the) |
| SHARPE, WILLIAM        | Professor Emeritus of Forest Hydrology                  | The Pennsylvania State University                     | United States of America (the)                             |
| Shaw, Sigourney        | HBSc Biology                                            | University of Ottawa                                  | Canada                                                     |
| Shaw, Alex             |                                                         | The University of Auckland                            | New Zealand                                                |
| Shaw, David            | Physicist                                               | University of York                                    | United Kingdom of Great Britain and Northern Ireland (the) |
| Shea, Glenn            | Senior Lecturer in Veterinary Anatomy                   | University of Sydney                                  | Australia                                                  |
| Shea, Daniel           | Postdoctoral Research Fellow / Ph.D. in Agriculture     | Iwate Biotechnology Research Center                   | Japan                                                      |
| Shearer, Julie         | Assistant Professor of Biology                          | Georgia Gwinnett College                              | United States of America (the)                             |
| Shearman, Philip       | Researcher                                              | Australian National University                        | Australia                                                  |

|                                           |                                                           |                                                                                            |                                                            |
|-------------------------------------------|-----------------------------------------------------------|--------------------------------------------------------------------------------------------|------------------------------------------------------------|
| Shearman, David                           | Emeritus Professor, Medicine                              | Adelaide University                                                                        | Australia                                                  |
| Sheehan, Stephen                          | Divisional Director (Qualified Meteorologist)             | Willis Towers Watson                                                                       | United Kingdom of Great Britain and Northern Ireland (the) |
| Sheehan, Tim                              | Environmentals Sciences                                   |                                                                                            | United States of America (the)                             |
| Sheehy, Griffin                           |                                                           | Florida Museum of Natural History                                                          | United States of America (the)                             |
| Sheeren, David                            | Associate Professor / Geographical Information Sciences   | Toulouse INP-ENSAT                                                                         | France                                                     |
| Sheffield, Dr. Steve                      | Professor of Biology                                      | Bowie State University                                                                     | United States of America (the)                             |
| Sheik Abbass, Mohammad Imthiaz Zulfur Ali | Forest conservation & Enforcement officer                 | Forestry Service                                                                           | Mauritius                                                  |
| Shek, Katherine                           | Ph.D. candidate                                           | Institute of Ecology and Evolution, University of Oregon                                   | United States of America (the)                             |
| Shell, Karen                              | Associate Professor                                       | Oregon State University                                                                    | United States of America (the)                             |
| Shen, Jiawei                              | Computing Science/Earth and Atmospheric Sciences          | University of Alberta                                                                      | Canada                                                     |
| Shenkute, Moges Beletew                   | Fishery and Limnology, and Fish parasitologist            | Debre Markos University, Natural and Computational Sciences College, Department of Biology | Ethiopia                                                   |
| Shennan, Carol                            | Professor of Agrecology                                   | UC Santa Cruz                                                                              | United States of America (the)                             |
| Shepard, Donald                           | Assistant Professor of Biological Sciences                | Louisiana Tech University                                                                  | United States of America (the)                             |
| Shepherd, Hannah                          | PhD student                                               | Max Planck institute                                                                       | United States of America (the)                             |
| Shepherd, Liz                             | Sustainability                                            | Bangor University                                                                          | United Kingdom of Great Britain and Northern Ireland (the) |
| Shepherd, Harry                           | PhD Student                                               | University of Southampton                                                                  | United Kingdom of Great Britain and Northern Ireland (the) |
| Shepon, Alon                              | environmental sciences and food systems                   | T.H. Chan school of public Health, Harvard University                                      | Israel                                                     |
| Sheppard, Christine S.                    | Ecologist                                                 | University of Hohenheim                                                                    | Germany                                                    |
| Sheppard, Anne                            | Research Associate                                        | University of Warwick                                                                      | United Kingdom of Great Britain and Northern Ireland (the) |
| Sheridan, Katherine                       | Conservation Biology MSc Candidate                        | University of Cape Town                                                                    | South Africa                                               |
| Sherley, Richard                          | Research Fellow, Environment and Sustainability Institute | University of Exeter                                                                       | United Kingdom of Great Britain and Northern Ireland (the) |
| Sherman, Emma                             | Scientist, Analytical chemistry                           | The New Zealand Institute for Plant & Food Research Limited                                | New Zealand                                                |
| Sherr, Barry                              | Professor emeritus of Microbial Oceanography              | CEOAS- Oregon State University                                                             | United States of America (the)                             |
| Sherr, Evelyn                             | Professor Emeritus, Oceanography                          | Oregon State University                                                                    | United States of America (the)                             |
| Sherren, Kate                             | Associate Professor                                       | Dalhousie University                                                                       | Canada                                                     |
| Sherrow, Hogan                            | Evolutionary Anthropology                                 |                                                                                            | United States of America (the)                             |
| Sherry, Tracey                            | Zoology                                                   |                                                                                            | United States of America (the)                             |
| Sherry, Thomas                            | Professor, Dept. of Ecology and Evolutionary Biology      | Tulane University                                                                          | United States of America (the)                             |
| Sherry, Rebecca                           | Lecturer, Environmental Studies                           | University of Oklahoma                                                                     | United States of America (the)                             |
| Sherwood, Steven                          | Professor, Atmospheric Sciences                           | UNSW Sydney                                                                                | Australia                                                  |
| Sherwood, Orla                            | PhD Student                                               | University College Dublin                                                                  | Ireland                                                    |
| SHERWOOD, ORRIN                           | Professor Emeritus Reproductive Biology                   | University of Illinois                                                                     | United States of America (the)                             |

|                           |                                                                        |                                                                         |                                                            |
|---------------------------|------------------------------------------------------------------------|-------------------------------------------------------------------------|------------------------------------------------------------|
| Shiel, John               | PhD(Eng) in adapting Australian houses for climate change              | EnviroSustain                                                           | Australia                                                  |
| Shields, Jimmy            | Forest Wildlife Management                                             | Australian Ecosystems Foundation Inc.                                   | Australia                                                  |
| Shields, Victoria         | PhD student in Chemical and Biological Engineering                     | University of Sheffield                                                 | United Kingdom of Great Britain and Northern Ireland (the) |
| Shigenaka, Gary           | Senior Marine Biologist                                                | National Oceanic and Atmospheric Administration                         | United States of America (the)                             |
| SHINDLER, BRUCE           | Emeritus Professor                                                     | Oregon State University                                                 | United States of America (the)                             |
| Shinn, Jamie              | Assistant Professor of Geography                                       | West Virginia University                                                | United States of America (the)                             |
| Shirai, Leila             | post-doc Biology                                                       | Unicamp                                                                 | Brazil                                                     |
| Shmaefsky, Brian          | Professor of Environmental Science                                     | Lone Star College - Kingwood                                            | United States of America (the)                             |
| Shoham, Jacob             | Professor emeritus of Life Sciences                                    | Bar Ilan University                                                     | Israel                                                     |
| Shohami, David            | PhD candidate, Ecology, Evolution and Behavior                         | The Hebrew University of Jerusalem                                      | Israel                                                     |
| Sholto Douglas, Deirdre   | Researcher/microbiologist                                              | Illinois Institute of Technology                                        | United States of America (the)                             |
| Short, Michael            | Senior Research Fellow                                                 | University of South Australia                                           | Australia                                                  |
| Short, Timothy            | Associate Professor of Biology, Plant Physiology and Molecular Biology | Queens College of the City University of New York                       | United States of America (the)                             |
| Shrader, Adrian           | Associate Professor Mammalian Behavioural Ecology                      | University of Pretoria                                                  | South Africa                                               |
| Shrum, Trisha             | Assistant Professor of Community Development & Applied Economics       | University of Vermont                                                   | United States of America (the)                             |
| Shumka, Spase             | Biologist                                                              | Agricultural University of Tirana                                       | Albania                                                    |
| Shumway, Nicole           | Conservation Biologist                                                 | The University of Queensland                                            | Australia                                                  |
| Shutler, Jamie            | Associate professor in Earth observation                               | University of Exeter                                                    | United Kingdom of Great Britain and Northern Ireland (the) |
| Shuttleworth, Adam        | Ecological Researcher                                                  | University of KwaZulu-Natal                                             | South Africa                                               |
| Siani, Sacha              | PhD Student in Geography                                               | Indiana University                                                      | United States of America (the)                             |
| Sibeaux, Adelaide         | PhD                                                                    | Deakin University - Center for Integrative Ecology                      | Australia                                                  |
| Sibik, Jozef              | Senior Researcher/Vegetation Scientist                                 | Plant Science and Biodiversity Center, Slovak Academy of Sciences       | Slovakia                                                   |
| Šibíková, Mária           | Senior researcher/geobotany, forest ecology                            | Plant Science and Biodiversity Center, Slovak Academy of Sciences       | Slovakia                                                   |
| Sibille, Brigitte         | PhD                                                                    | University of Nice                                                      | France                                                     |
| sibly, frank              | Consultant Orthopaedic Surgeon                                         | Wye Valley NHS trust                                                    | United Kingdom of Great Britain and Northern Ireland (the) |
| Sibly, Richard            | Ecology Professor                                                      | University of Reading                                                   | United Kingdom of Great Britain and Northern Ireland (the) |
| Sibret, Thomas            | Researcher                                                             | Ghent University                                                        | Belgium                                                    |
| SICARD, Jean-Charles      | Senior scientist - bio statistics - data processing                    | CIRAD                                                                   | France                                                     |
| Siddaramappa, Shivakumara | Faculty Scientist                                                      | Institute of Bioinformatics and Applied Biotechnology                   | India                                                      |
| Siddens, Lisbeth K.       | Environmental Toxicology                                               | Oregon State University                                                 | United States of America (the)                             |
| Siddique, Ilyas           | Adjunct Professor                                                      | Department of Crop Science, Federal University of Santa Catarina (UFSC) | Brazil                                                     |
| SIE, Marion               | Life Cycle Analyst                                                     | VERSo                                                                   | France                                                     |

|                                |                                                                    |                                                                                 |                                                            |
|--------------------------------|--------------------------------------------------------------------|---------------------------------------------------------------------------------|------------------------------------------------------------|
| Sié, Pierre                    | Professor emeritus (Haematology)                                   | University Paul Sabatier                                                        | France                                                     |
| Siebert, Julia                 |                                                                    | German Centre for Integrative Biodiversity Research (iDiv) Halle-Jena-Leipzig   | Germany                                                    |
| Siedlecki, Igor                | biology                                                            | Faculty of Biology University of Warsaw                                         | Poland                                                     |
| Siefferman, Lynn               | Professor of Biology                                               | Appalachian State University                                                    | United States of America (the)                             |
| Siegel, Lori                   | Senior Modeler                                                     | Climate Interactive                                                             | United States of America (the)                             |
| Siegel, Kristen                | Graduate Student                                                   | Queen' s University                                                             | Canada                                                     |
| Siegel, Kyle                   | Organismal biology                                                 | Northwestern University                                                         | United States of America (the)                             |
| Siegert, Thomas                | Astrophysicist                                                     | Center for Astrophysics and Space Sciences, University of California, San Diego | United States of America (the)                             |
| Sielaff, Hendrik               | Postdoc, Biophysics                                                | National University of Singapore                                                | Singapore                                                  |
| Sieracki, Paul                 | Geospatial Analyst/Wildlife Biologist                              | Retired Consultant                                                              | United States of America (the)                             |
| Sierka, Edyta                  | Dr hab. biology/ environmental protection                          | University of Silesia in Katowice                                               | Poland                                                     |
| Sierra-de-Grado, Rosario       | Profesor/ Forest genetics                                          | Universidad de Valladolid                                                       | Spain                                                      |
| Sieverts, Eric                 | Physicist                                                          | retired                                                                         | Netherlands (the)                                          |
| Siewerding Meirelles, Gabriela | PhD student                                                        | Lancaster University                                                            | United Kingdom of Great Britain and Northern Ireland (the) |
| Sigala, Jorge                  | Evolutionary Ecology and Climate Change                            | National Institute of Ecology and Climate Change                                | Mexico                                                     |
| Sigg, Laura                    | Professor in aquatic chemistry (emerita)                           | Eawag, Swiss Federal Institute of Aquatic Science and Technology                | Switzerland                                                |
| SIGURA, MAURIZIA               | RESEARCHER, AGRICULTURAL ENGINEERING                               | UNIVERSITY OF UDINE                                                             | Italy                                                      |
| Sigurdsson, Oddur              | Geologist/Glaciologist                                             | Icelandic Meteorological Office                                                 | Iceland                                                    |
| Šigut, Ladislav                | Postdoc - Biogeochemistry                                          | Global Change Research Institute Czech Academy of Sciences                      | Czech Republic (the)                                       |
| Sikes, Benjamin                | Associate Scientist/Professor                                      | University of Kansas                                                            | United States of America (the)                             |
| Silantjeva, Olga               | Postdoctor                                                         | Universitet i Oslo                                                              | Norway                                                     |
| Silberberger, Marc             | Marine Ecology                                                     | The Institute of Oceanology of the Polish Academy of Sciences (IO PAN)          | Poland                                                     |
| Siles, Jose A.                 | Postdoc on Soil Microbial Ecology                                  | University of California, Berkeley                                              | United States of America (the)                             |
| Silingardi, Helena Maura       | Professor Doctor                                                   | Universidade Federal de Uberlândia, Brazil                                      | Brazil                                                     |
| Siljander, Pia                 | Biosciences                                                        | University of Helsinki                                                          | Finland                                                    |
| Silk, Matthew                  | Postdoctoral Researcher, Ecology                                   | University of Exeter                                                            | United Kingdom of Great Britain and Northern Ireland (the) |
| Silla Cortés, Fernando         | Assitant Professor                                                 | University of Salamanca                                                         | Spain                                                      |
| Sillam-Dussès, David           |                                                                    | University Paris 13                                                             | France                                                     |
| Sills, Erin                    | Professor                                                          | North Carolina State University                                                 | United States of America (the)                             |
| Silova, Iveta                  | Education Policy                                                   | Arizona State University                                                        | United States of America (the)                             |
| Silva, Heron                   | Professor                                                          | Federal University of São Paulo                                                 | Brazil                                                     |
| Silva, Diana                   | Arachnologist/taxonomy, biogeography and biodiversity conservation | Natural History Museum, UNMSM                                                   | Peru                                                       |
| Silva, Otávio                  | Post-doctoral researcher                                           | Instituto de Botânica                                                           | Brazil                                                     |

|                                    |                                                         |                                                                                  |                                                            |
|------------------------------------|---------------------------------------------------------|----------------------------------------------------------------------------------|------------------------------------------------------------|
| Silva, Sofia                       | PhD student                                             | Durham University                                                                | United Kingdom of Great Britain and Northern Ireland (the) |
| Silva, João Gabriel                | Full Professor                                          | University of Coimbra                                                            | Portugal                                                   |
| Silva, Miguel                      | Political Economy                                       |                                                                                  | Brazil                                                     |
| Silva, André                       | Doctoral student                                        | Uppsala University                                                               | Sweden                                                     |
| Silva, Luiz                        | Professor in Agricultural Sciences                      | Universidade Federal de Feira de Santana                                         | Brazil                                                     |
| Silva, Bruna                       | master's student                                        | Federal University of Santa Catarina                                             | Brazil                                                     |
| Silva, Monalisa                    | PhD Ecology                                             | UFRN                                                                             | Brazil                                                     |
| Silva, Thiago                      | Lecturer                                                | Biological and Environmental Sciences, University of Stirling                    | United Kingdom of Great Britain and Northern Ireland (the) |
| Silva, José                        | PhD Student in Astrophysics                             | Institute of Astrophysics and Space Sciences                                     | Portugal                                                   |
| Silva, Suelma                      | Plant Ecology                                           | Cerrado Biodiversity Assessment, Research and Conservation Center                | Brazil                                                     |
| Silva, Flávio                      | Assistant Researcher - Environmental Engineering        | University of Aveiro, Centre for Environmental and Marine Studies (CESAM)        | Portugal                                                   |
| Silva, Mariana Elizabeth           | Biologist                                               | University of Buenos Aires                                                       | Argentina                                                  |
| Silva, Sofia Marques               | Post-Doc Researcher                                     | Research Center in Biodiversity and Genetic Resources, CIBIO/InBIO               | Portugal                                                   |
| Silva, Guilherme                   | Biologist                                               | Campinas State University                                                        | Brazil                                                     |
| Silva Junior, Celso Henrique Leite | PhD Candidate                                           | National Institute for Space Research (INPE)                                     | Brazil                                                     |
| Silva Macher, Jose Carlos          | Ecological economist                                    | Pontificia Universidad Católica del Perú                                         | Peru                                                       |
| Silva-Dávila, Diana                | Tenured Professor and Researcher/Biological Sciences    | Universidad Nacional Mayor de San Marcos                                         | Peru                                                       |
| Silva-Morales, Elysa               | Restoration Ecologist                                   | Universidad de Alicante                                                          | Spain                                                      |
| Silvano, Renato                    | Associate Professor/Ecology                             | Universidade Federal do Rio Grande do Sul                                        | Brazil                                                     |
| Silveira, Marcos                   | Full Professor                                          | Federal University of Acre                                                       | Brazil                                                     |
| Silveira, Fernando                 | Professor of Plant Ecology                              | Federal university of Minas Gerais                                               | Brazil                                                     |
| Silveira, Luís                     | Masters Student of Biodiversity, Genetics and Evolution | CIBIO                                                                            | Portugal                                                   |
| Silvério, Natália                  |                                                         | Research at Observatory of Protected Areas. Federal University of Santa Catarina | Brazil                                                     |
| Silvis, Starr                      | Professor Environmental Engineering                     |                                                                                  | United States of America (the)                             |
| Silvy, Yona                        | PhD student                                             | LOCEAN/IPSL, Sorbonne Université                                                 | France                                                     |
| Sim, Texa                          | PhD Researcher in Marine Ecology                        | Scottish Association for Marine Science                                          | United Kingdom of Great Britain and Northern Ireland (the) |
| SIMA, Adriana                      | Research Engineer, climate modeling                     | CNRS                                                                             | France                                                     |
| Sime, Karen                        | Professor                                               | SUNY Oswego                                                                      | United States of America (the)                             |
| Simelton, Elisabeth                | Climate change scientist                                | World Agroforestry (ICRAF)                                                       | Viet Nam                                                   |
| Simeonov, Todor                    | Curator, philosophy                                     | Changing World Foundation                                                        | Hungary                                                    |
| Simioni, Guillaume                 | Research scientist, Ecology                             | INRA                                                                             | France                                                     |
| Simkanin, Christina                | Research Ecologist                                      | Smithsonian Institution                                                          | United States of America (the)                             |
| Šimko, Jakub                       | Computer science                                        | Slovak University of Technology in Bratislava                                    | Slovakia                                                   |
| Simmer, Clemens                    | university professor, meteorology                       | University Bonn                                                                  | Germany                                                    |

|                                  |                                                                                                       |                                                           |                                                            |
|----------------------------------|-------------------------------------------------------------------------------------------------------|-----------------------------------------------------------|------------------------------------------------------------|
| Simmons, Amie                    | Research Program Coordinator                                                                          | Oklahoma Medical Research Foundation                      | United States of America (the)                             |
| Simmons, Tuesday                 | PhD candidate, Microbiology                                                                           | UC Berkeley                                               | United States of America (the)                             |
| Simoes, Marianna                 | PostDoc                                                                                               | Senckenberg Research Institute and Natural History Museum | Germany                                                    |
| Simões de Castro, Luiz Alexandre | PhD candidate                                                                                         | São Paulo State University                                | Brazil                                                     |
| Simões Santos Leal, Bárbara      | Postdoc researcher in Plant Biology                                                                   | UNICAMP                                                   | Brazil                                                     |
| Simões VITULE, JEAN RICARDO      | Professor of Ecology                                                                                  | Federal University of Parana                              | Brazil                                                     |
| Simon, Carine                    | Researcher in marine science                                                                          | Instituto de Ciencias Marinas, CSIC                       | Spain                                                      |
| Simon, Rüdiger                   | Professor for Biology                                                                                 | Heinrich Heine University Düsseldorf                      | Germany                                                    |
| Simon, Laurence                  | Professor of International Development and Director, Center for Global Development and Sustainability | Brandeis University                                       | United States of America (the)                             |
| Simon, Stephen J.                | PhD, Chemistry, retired                                                                               | Consultant/ Independent                                   | United States of America (the)                             |
| Simon, Monique                   | Post-doctoral researcher/Evolutionary Biology                                                         | Universidade de Sao Paulo                                 | Brazil                                                     |
| Simon, Judy                      | Plant Ecophysiology                                                                                   | University of Konstanz                                    | Germany                                                    |
| Simon, Jean-Christophe           | Directeur de recherche                                                                                | Institut National de la Recherche Agronomique             | France                                                     |
| Simon, Alexis                    | PhD student, Evolutionary Biology                                                                     | ISEM, Univ Montpellier, CNRS, EPHE, IRD                   | France                                                     |
| Simon, Amelie                    | Postdoctoral fellow                                                                                   | CNRS                                                      | France                                                     |
| Simoncelli, Stefano              | Research scientist                                                                                    | IGB Berlin                                                | Germany                                                    |
| Simoncic, Valentin               | student in health geography                                                                           | IRD                                                       | France                                                     |
| Simonet, Virginie                | senior scientist in Physics                                                                           | Institut Néel, CNRS                                       | France                                                     |
| Simonet, Camille                 | PhD evolutionary microbiology and medicine                                                            | University of Edinburgh                                   | United Kingdom of Great Britain and Northern Ireland (the) |
| SIMONET, Guillaume               | Independant Researcher on Adaptation to Climate Change - Environmental Sciences                       | Abstraction Services                                      | France                                                     |
| Simonin, Marie                   | Postdoctoral Associate                                                                                | IRD, IPME, Montpellier                                    | France                                                     |
| Simonini, Roberto                | Associate Professor of Ecology                                                                        | University of Modena and Reggio Emilia                    | Italy                                                      |
| Simonneaux, Vincent              | Remote Sensing of agriculture and water resources                                                     | IRD                                                       | France                                                     |
| Simonyi, Gyula Istvan            | President. Economist, mathematician.                                                                  | BOCS Foundation                                           | Hungary                                                    |
| Simpson, Robert                  | Soil Biochemist                                                                                       | The New Zealand Institute for Plant and Food Research     | New Zealand                                                |
| Simpson, Juliet                  | Coastal Ecologist                                                                                     | Massachusetts Institute of Technology                     | United States of America (the)                             |
| Simpson, Gregory                 | Lecturer, Veterinary Science                                                                          | University of Pretoria                                    | South Africa                                               |
| Simpson, Dr Nicholas             | Postdoctoral Research Fellow: Africa Climate and Development Initiative                               | University of Cape Town                                   | South Africa                                               |
| Simpson, Brent                   | Senior Natural Resources Management Officer                                                           | Food and Agriculture Organization of the United Nations   | Italy                                                      |
| Sinaga, Hans                     | Head of Sub Directorate                                                                               | Ministry of Environment and Forestry                      | Indonesia                                                  |
| Sinclair, Brent                  | Professor of Biology                                                                                  | Western University                                        | Canada                                                     |
| Sinclair, Amanda                 | PhD Candidate                                                                                         | RMIT Univeristy                                           | Australia                                                  |
| Sinderson, Elias                 | Retired, Computer Science                                                                             | UCSC / NASA                                               | United States of America (the)                             |
| Sindičić, Magda                  | Assistant professor                                                                                   | Faculty of Veterinary Medicine University of Zagreb       | Croatia                                                    |
| Singels, Abraham                 | Principal Agronomist                                                                                  | South African Sugarcane Research Institute                | South Africa                                               |

|                                 |                                                                       |                                                                   |                                                            |
|---------------------------------|-----------------------------------------------------------------------|-------------------------------------------------------------------|------------------------------------------------------------|
| Singer, Gabriel                 | Senior Scientist, Freshwater Ecology                                  | Leibniz-Institute of Freshwater Ecology and Inland Fisheries      | Germany                                                    |
| Singer, Michael S.              | Professor of Biology and Environmental Studies                        | Wesleyan University                                               | United States of America (the)                             |
| Singh, Jyotsana                 | Junior Research Fellow                                                | National Centre for Cell Science                                  | India                                                      |
| Singh, Gajendra                 | Ph.D Scholar                                                          | Guru Gobind Singh Indraprastha University                         | India                                                      |
| Singh, Tanya                    | Researcher climate change and health                                  | Wageningen UR - Wageningen Environmental Research                 | Netherlands (the)                                          |
| Singh, Harinder Rai             | Marine & Coastal Ecology                                              | MARA University of Technology (UiTM)                              | Malaysia                                                   |
| Singh, Baljinder                | Marine Biology & Molecular Medicine & Public Health                   |                                                                   | Canada                                                     |
| SINGH, HARINDER RAI             | ACADEMIC/MARINE ECOLOGY-BIOLOGY                                       | MARA UNIVERSITY OF TECHNOLOGY                                     | Malaysia                                                   |
| Siniscalco, Consolata           | Professor in Plant Ecology                                            | University of Turin                                               | Italy                                                      |
| Sinkakarimi, Mohammad Hosein    | Research Center for the Caspian Region                                | University of Mazandaran                                          | Iran (Islamic Republic of)                                 |
| Sinnadurai, Paul                | Natural Resources Manager                                             | Brecon Beacons National Park Authority                            | United Kingdom of Great Britain and Northern Ireland (the) |
| Sinnesael, Arne                 | PhD student                                                           | KU Leuven                                                         | Belgium                                                    |
| sintim, Henry                   | Soil Fertility Specialist                                             | University of Georgia                                             | United States of America (the)                             |
| Sion, Letizia                   | Researcher in Ecology                                                 | Department of Biology_University of Bari Aldo Moro                | Italy                                                      |
| Siqueira, Felipe                | Professor                                                             | Universidade Federal do Sul e Sudeste do Pará                     | Brazil                                                     |
| Siqueira-Gay, Juliana           | Ph.D. Candidate/Environmental Sciences                                | University of São Paulo                                           | Brazil                                                     |
| Sirami, Clelia                  | Researcher in ecology                                                 | INRA                                                              | France                                                     |
| Sire, Lucas                     | Ph.D student                                                          | Institut de Recherche sur la Biologie de l’Insecte                | France                                                     |
| Siregar, R.S.E.                 | Researcher                                                            | Research Center for Climate Change                                | Indonesia                                                  |
| Sirén, Anders                   | Adjunct professor of geography                                        | University of Turku                                               | Finland                                                    |
| Siriwardana, Chamindika         |                                                                       | University of North Carolina Wilmington                           | United States of America (the)                             |
| Siriwardane-de Zoysa, Dr. Rapti | Postdoctoral researcher, Marine Anthropology                          | Leibniz Center for Tropical Marine Research                       | Germany                                                    |
| Sischo, David                   | Wildlife Biologist                                                    | Hawaii Department of Land and Natural Resources                   | United States of America (the)                             |
| Sissokho, Papa                  | Mathematics                                                           | Illinois State University                                         | United States of America (the)                             |
| Sist, Plinio                    | Director of Forests&Societies research unit at Cirad/Forest Scientist | Cirad                                                             | France                                                     |
| Sitas, Nadia                    | Senior researcher in sustainability science                           | Centre for Complex Systems in Transition, Stellenbosch University | South Africa                                               |
| Siuda, Waldemar                 | Associate professor                                                   | University of Warsaw, Faculty of Biology                          | Poland                                                     |
| Sivan, Orit                     | Prof. in Environmental Sciences                                       | Ben Gurion University of the Negev                                | Israel                                                     |
| Six, Diana                      | Professor of Forest Entomology and Ecology                            | University of Montana                                             | United States of America (the)                             |
| Sixt, Christina                 | PhD Student                                                           | Hochschule Geisenheim University, Department of Applied Ecology   | Germany                                                    |
| Sjodin, Anna                    | Post doctoral researcher - Ecology, Biology, Genetics, Math           | University of Idaho                                               | United States of America (the)                             |
| Sjödín, Per                     | researcher                                                            | Uppsala University                                                | Sweden                                                     |
| Sjöqvist, Conny                 | Postdoc                                                               | Åbo Akademi University                                            | Finland                                                    |
| Skamantzouras, Apostolis        | Physicist                                                             | National and Kapodistrian University of Athens                    | Greece                                                     |
| Skewes, Timothy                 | Marine ecologist                                                      | CSIRO                                                             | Australia                                                  |

|                            |                                                        |                                                                         |                                                            |
|----------------------------|--------------------------------------------------------|-------------------------------------------------------------------------|------------------------------------------------------------|
| Skiffington, Janice        | Research Coordinator                                   | University of Calgary                                                   | Canada                                                     |
| Skillman, John             | Professor of Environmental Biology                     | California State University                                             | United States of America (the)                             |
| Sklair, Leslie             | EMERITUS PROFESSOR OF SOCIOLOGY                        | LONDON SCHOOL OF ECONOMICS                                              | United Kingdom of Great Britain and Northern Ireland (the) |
| Skok, John                 | Planetary Science                                      | SETI Institute                                                          | United States of America (the)                             |
| Sköld, Helen               | marine biology                                         | University of Gothenburgh                                               | Sweden                                                     |
| Skoog, Steven              | Chemist                                                | Denka Performance Elastomer                                             | United States of America (the)                             |
| Skoracka, Anna             | Associate Professor in Ecology                         | Adam Mickiewicz University in Poznań                                    | Poland                                                     |
| Skorupa, Agnieszka         | Psychologist                                           | University of Silesia                                                   | Poland                                                     |
| Skoulikidis, Nikolaos      | Researc Director                                       | Hellenic Center for Marine Research                                     | Greece                                                     |
| Skovshoved, Rasmus Iversen | Civil & Environmental Engineering                      | Technical University of Denmark                                         | Denmark                                                    |
| Skowronek, Sandra          | Researcher / Ecology                                   | German Federal Agency for Nature Conservation                           | Germany                                                    |
| Skubala, Piotr             | Professor, soil ecologist                              | University of Silesia in Katowice                                       | Poland                                                     |
| Skwark, Marcin J.          | Research Associate                                     | University of Cambridge                                                 | United Kingdom of Great Britain and Northern Ireland (the) |
| Slack, Megan               | Graduate Research Assistant                            | University of Kentucky                                                  | United States of America (the)                             |
| Slack, Jay                 | Pharmacology                                           |                                                                         | United States of America (the)                             |
| Slaney, Larissa            | Conservation Biologist; PhD (Life Sciences) researcher | Heriot-Watt University                                                  | United Kingdom of Great Britain and Northern Ireland (the) |
| Slater, Nigel              | Professor of Chemical Engineering                      | University of Cambridge                                                 | United Kingdom of Great Britain and Northern Ireland (the) |
| Slater, Peter              | Emeritus Kennedy Professor of Natural History          | University of St Andrews                                                | United Kingdom of Great Britain and Northern Ireland (the) |
| Slaus, ivo                 | professor emeritus, physics                            | R. Boskovic Institute and World Academy of Art and Science              | Croatia                                                    |
| Slavík, Ondřej             | Zoology                                                | Česká zemědělská univerzita v Praze                                     | Czech Republic (the)                                       |
| SLIMANI, Tahar             | Professor of Biology                                   | Cadi Ayyad University                                                   | Morocco                                                    |
| Slingsby, Jasper           | Honorary Research Associate                            | University of Cape Town                                                 | South Africa                                               |
| Sloan, Terry               | Emeritus Professor of Physics, Particle Physics        | Lancaster University                                                    | United Kingdom of Great Britain and Northern Ireland (the) |
| Slugovc, Christian         | Prof. / Chemistry                                      | Graz University of Technology                                           | Austria                                                    |
| Smale, Malcolm             | Marine Biologist                                       | BCRE                                                                    | South Africa                                               |
| Smart, Michael             | Zoology                                                | Colorado state university                                               | United States of America (the)                             |
| Smetacek, Victor           | Professor Emeritus BioOceanography                     | Alfred Wegener Institute Helmholtz Centre for Polar and Marine Research | Germany                                                    |
| Smid, Marek                |                                                        | BC3                                                                     | Czech Republic (the)                                       |
| smidt, marten              | professor molecular neuroscience                       | UVA/SILS                                                                | Netherlands (the)                                          |
| Smirnova, Angela           | Research Associate                                     | University of Calgary, Dept. of Biological Sciences                     | Canada                                                     |
| Smiseth, Per               | Reader in Animal Behaviour                             | University of Edinburgh                                                 | United Kingdom of Great Britain and Northern Ireland (the) |
| Smit, Michiel              | Crop physiologist                                      | Edamame Development Program                                             | South Africa                                               |
| Smit, Sophie               | PhD student cognitive science                          | Macquarie University                                                    | Australia                                                  |

|                           |                                                                               |                                                             |                                                            |
|---------------------------|-------------------------------------------------------------------------------|-------------------------------------------------------------|------------------------------------------------------------|
| Smith, Neil               | (retired) Research Associate - Astrophysics                                   | The University of Adelaide                                  | Australia                                                  |
| Smith, Raymond            | Prof Emeritus - Marine Ecology                                                | University of California Santa Barbara                      | United States of America (the)                             |
| Smith, Winston            | Principal Research Scientist                                                  | Institute of Arctic Biology, University of Alaska-Fairbanks | United States of America (the)                             |
| Smith, Katie              | Post-Doctoral Researcher                                                      | UC Davis                                                    | United States of America (the)                             |
| Smith, Jonathan           | Scientific Software Engineer                                                  | Francis Crick Institute                                     | United Kingdom of Great Britain and Northern Ireland (the) |
| Smith, Bradley            | Senior Lecturer in Psychology                                                 | Central Queensland University                               | Australia                                                  |
| Smith, Rachael            | PhD Student in Renewable Energy Engineering                                   |                                                             | United Kingdom of Great Britain and Northern Ireland (the) |
| Smith, Marilyn            | Senior Scientist                                                              | Retired-KU Medical Center; Viracor-Eurofins                 | United States of America (the)                             |
| Smith, Tyler              | Associate Professor of Marine Biology                                         | University of the Virgin Islands                            | Virgin Islands (U.S.)                                      |
| Smith, Ward               | Physical Scientist                                                            |                                                             | Canada                                                     |
| Smith, Graham             | Lead Scientist / Ecology                                                      | APHA                                                        | United Kingdom of Great Britain and Northern Ireland (the) |
| Smith, Steve              | Head of Ecological Genetics                                                   | University of Veterinary Medicine, Vienna                   | Austria                                                    |
| Smith, James              | Marine Research Scientist                                                     | University of California, Santa Cruz                        | United States of America (the)                             |
| Smith, Pete               | Professor of Soils & Global Change                                            | University of Aberdeen                                      | United Kingdom of Great Britain and Northern Ireland (the) |
| Smith, Sarah              | Biological sciences                                                           | Industry                                                    | United Kingdom of Great Britain and Northern Ireland (the) |
| Smith, L David            | Professor, Biological Sciences                                                | Smith College                                               | United States of America (the)                             |
| Smith, Darvin Scott       | Physician / Human Biology Department                                          | Stanford University                                         | United States of America (the)                             |
| Smith, W. Douglas         | Environmental Scientist                                                       | U.S. Environmental Protection Agency                        | United States of America (the)                             |
| Smith, R. Darrell         | Wetland Ecologist                                                             | Global Environmental Relief                                 | United States of America (the)                             |
| Smith, Lowell             | physicist, retired US Climate Change Research Program agency program director | retired, US Environmental Protection Agency                 | United States of America (the)                             |
| Smith, Joshua             | Wildlife Research Biologist                                                   | Oregon Department of Fish and Wildlife                      | United States of America (the)                             |
| Smith, Judy               | Ecological Consultant                                                         | P & J Smith Ecological Consultants                          | Australia                                                  |
| Smith, Peter              | Consultant ecologist - wildlife and vegetation                                | P & J Smith Ecological Consultants                          | Australia                                                  |
| Smith, Abigail            | Professor of Marine Science                                                   | University of Otago                                         | New Zealand                                                |
| Smith, Ceal               | Research & Policy Analyst                                                     | Alaska Institute for Climate & Energy                       | United States of America (the)                             |
| Smith, Glen               | Postdoctoral researcher, climate change adaptation.                           | University College Cork, UCC                                | Ireland                                                    |
| Smith, Lisa               | Master of Science degree. Registered Nurse. Scientist.                        | Kingston Health Sciences Centre                             | Canada                                                     |
| Smith, Felix              | Public trust fish and wildlife management                                     | Retired                                                     | United States of America (the)                             |
| Smith, Bob                | PhD. Biomedical Sciences                                                      | University of Toronto                                       | Canada                                                     |
| SMITH, PETER              | Retired Head of Science                                                       | Bexhill College                                             | United Kingdom of Great Britain and Northern Ireland (the) |
| Smith-Mannschott, Katrina | Ph.D. Student                                                                 | ETH Zurich                                                  | Switzerland                                                |
| Smithers, Richard J.      | Associate Director                                                            | Ricardo Energy & Environment                                | United Kingdom of Great Britain and Northern Ireland (the) |
| Smoak, Copley             | Biology                                                                       | Conservancy of SW Florida                                   | United States of America (the)                             |

|                                   |                                                                    |                                                                          |                                                               |
|-----------------------------------|--------------------------------------------------------------------|--------------------------------------------------------------------------|---------------------------------------------------------------|
| Smoot, James                      | Microbiology                                                       |                                                                          | United States of America (the)                                |
| Smyth, William                    | professor of oceanography                                          | Oregon State University                                                  | United States of America (the)                                |
| Snaddon, Kate                     | Freshwater ecologist                                               | Freshwater Research Centre                                               | South Africa                                                  |
| Snell, Rebecca                    | Assistant Professor of Plant Ecology                               | Ohio University                                                          | United States of America (the)                                |
| Snell, Katherine                  | Post-doctoral Researcher, Macroecology                             | CMEC                                                                     | Denmark                                                       |
| Snyder, Dr. Jeff                  | Assistant Professor of Biology/Ecology                             | Western Oregon University                                                | United States of America (the)                                |
| Snyers, Luc                       | Ass. Prof.                                                         | Medical University of Vienna                                             | Austria                                                       |
| Soares, Marcelo                   | Associate Professor                                                | Instituto de Ciências do Mar (LABOMAR),<br>Universidade Federal do Ceará | Brazil                                                        |
| Soares, Maria                     | Post-doc                                                           |                                                                          | Portugal                                                      |
| Sobek, Sebastian                  | Associate Professor, Limnology                                     | Uppsala University                                                       | Sweden                                                        |
| Sobel, Adam                       | Professor, Atmospheric Science                                     | Columbia University                                                      | United States of America (the)                                |
| Sõber, Virve                      | Researcher in Ecology                                              | University of Tartu                                                      | Estonia                                                       |
| Sobol, Agnieszka                  | assistant professor, Faculty of Economics                          | University of Economics in Katowice                                      | Poland                                                        |
| Šobotník, Jan                     | Professor of tropical entomology                                   | Czech University of Life Sciences                                        | Czech Republic (the)                                          |
| Sobral, Mar                       | Ecologist                                                          | University of Santiago de Compostela                                     | Spain                                                         |
| Sobrinho, José A.                 | Professor Earth Physics/Remote Sensing                             | University of Valencia                                                   | Spain                                                         |
| SOBRINO CASTELLO, FRANCISCO       | RESEARCH PROFESOR/VIROLOGY                                         | SPANISH RESEARCH COUNCIL                                                 | Spain                                                         |
| Soccodato, Alice                  | Researcher                                                         | Cnes                                                                     | France                                                        |
| Söderholm, Annika                 | Postdoctoral researcher in Structural biology                      | Uppsala University                                                       | Sweden                                                        |
| Söderlund Kanarp, Christoffer     | Ph.D. Student in Environmental Communication                       | Swedish University of Agricultural Sciences                              | Sweden                                                        |
| Sodré, Elder de Oliveira          | PhD in Ecology                                                     | UFRJ                                                                     | Brazil                                                        |
| Soen, Jonathan                    | R&D Engineer, PhD (control systems)                                | Thales Avionics                                                          | France                                                        |
| Soens, Tim                        | University Professor                                               | University of Antwerp                                                    | Belgium                                                       |
| Sogbohossou, Deedi                |                                                                    | University of Abomey-Calavi, Benin                                       | Benin                                                         |
| Sogbohossou, Etotepe              | Associate Professor                                                | University of Abomey-Calavi                                              | Benin                                                         |
| Soinne, Helena                    | Senior Scientist / Soil Science                                    | Natural Resources Institute Finland                                      | Finland                                                       |
| Soja, Constance M                 | Professor of Geology, Emerita                                      | Colgate University                                                       | United States of America (the)                                |
| Sojamo, Suvi                      | Post-Doctoral Fellow, water resources management<br>and governance | Aalto University                                                         | Finland                                                       |
| Sokolov, Nina                     | PhD student                                                        | UC Berkeley                                                              | United States of America (the)                                |
| Sokolove, Phillip                 | Professor of Biological Sciences, Retired                          | University of Maryland, Baltimore County                                 | United States of America (the)                                |
| Sokołowska-Mikołajczyk, Mirosława | Professor / Ichthyobiology                                         | University of Agriculture in Krakow                                      | Poland                                                        |
| Solan, Martin                     | Professor                                                          | University of Southampton                                                | United Kingdom of Great Britain<br>and Northern Ireland (the) |
| Solar, Ricardo                    | Professor of Ecology                                               | Universidade Federal de Minas Gerais                                     | Brazil                                                        |
| Soldado-Magraner, Saray           | Postdoctoral Researcher                                            | Institute of Neuroinformatics, ETH-UZH Zurich                            | Switzerland                                                   |
| Soldatini, Cecilia                | researcher                                                         | CICESE                                                                   | Mexico                                                        |
| Soldera, Armand                   | Professor in Chemistry                                             | Université de Sherbrooke                                                 | Canada                                                        |
| Sole-Cava, Antonio                | Professor - Genetics. Former Dean of the Biology<br>Institute      | Rio de Janeiro Federal University                                        | Brazil                                                        |

|                     |                                                                                    |                                                                                 |                                                            |
|---------------------|------------------------------------------------------------------------------------|---------------------------------------------------------------------------------|------------------------------------------------------------|
| SOLER, Nicolas      | Associate professor / Microbiology                                                 | Université de Lorraine                                                          | France                                                     |
| Soleri, Daniela     |                                                                                    | University of California, Santa Barbara                                         | United States of America (the)                             |
| Solidoro, Cosimo    | Research director oceanography                                                     | National institute fornisce oceanography and applied geophysics                 | Italy                                                      |
| Soliño, Mario       | Associate professor in Economics                                                   | Complutense University of Madrid                                                | Spain                                                      |
| Solis, Angel        | Entomologist                                                                       | BioAlfa                                                                         | Costa Rica                                                 |
| Soliveres, Santiago | Ramon y Cajal fellow, Ecology                                                      | Department of Ecology, University of Alicante                                   | Spain                                                      |
| Solla, Alejandro    | Full Professor                                                                     | Faculty of Forestry of Plasencia, University of Extremadura                     | Spain                                                      |
| Soller, Raenell     | Atmospheric Sciences                                                               | Georgia Institute of Technology                                                 | United States of America (the)                             |
| Sollin, Lars        | Retired Theoretical Physicist                                                      |                                                                                 | Sweden                                                     |
| Sollins, Phillip    | Professor of Forest Ecology and Soils, Emeritus                                    | College of Forestry, Oregon State University                                    | United States of America (the)                             |
| Sollmann, Rahel     | Assistant Professor, Quantitative Ecology                                          | University of California Davis                                                  | United States of America (the)                             |
| Sollner, Gerhard    | Engineering Fellow / physicist                                                     | Raytheon Company                                                                | United States of America (the)                             |
| Solomey, Nickolas   | Prof. Of Physics                                                                   | Wichita State University                                                        | United States of America (the)                             |
| Soltis, Douglas     | Professor of Plant Biology                                                         | University of Florida                                                           | United States of America (the)                             |
| Solymosi, Gábor     | Data Scientist                                                                     | Budapest University of Technology and Economics                                 | Hungary                                                    |
| Somerville, Vincent | PhD candidate                                                                      | University of Lausanne                                                          | Switzerland                                                |
| Somerville, Hugh    | Microbiology                                                                       | retired Prof University of Surrey                                               | United Kingdom of Great Britain and Northern Ireland (the) |
| Somma, Louis A.     | Biological Scientist & Research Associate/Disciplines: Herpetology & Entomology    | Florida State Collection of Arthropods                                          | United States of America (the)                             |
| Sommer, Morten      | Professor in Microbiology                                                          | The Technical University of Denmark                                             | Denmark                                                    |
| Sommer, Stefan      | Ecologist                                                                          | Northern Arizona University                                                     | United States of America (the)                             |
| Sommer, Julia       | Bioscience                                                                         | Goethe-University Frankfurt/ Main                                               | Germany                                                    |
| Sommers, Pacifica   | Postdoctoral Associate in Ecology and Evolutionary Biology                         | University of Colorado Boulder                                                  | United States of America (the)                             |
| Sommers, Aleah      | Postdoctoral Fellow, civil engineering, ice sheet and climate modeling             | National Center for Atmospheric Research                                        | United States of America (the)                             |
| Sondenaa, Angela    | Botanist                                                                           | Nez Perce Tribe                                                                 | United States of America (the)                             |
| Søndergaard, Tonny  | Materials science engineer                                                         | The Technical University of Denmark                                             | Denmark                                                    |
| Sondermann, Wolfram | independent researcher, Ph.D., Biology                                             | n/a                                                                             | Germany                                                    |
| Songha, Joydeep     | Senior research fellow in physics                                                  | Indian Institute of Technology Madras                                           | India                                                      |
| Sonkoly, Judit      | assistant research fellow, ecology                                                 | University of Debrecen                                                          | Hungary                                                    |
| Sonneck, Judith     | Global Landscapes Forum Global Assistant Coordinator                               | Center for International Forestry Research                                      | Germany                                                    |
| Sonnemann, Jürgen   | Paediatric Oncology                                                                | Jena University Hospital                                                        | Germany                                                    |
| Soofi, Mahmood      | Post-doctoral scientist in the Field of Conservation Sciences and wildlife Ecology | Workgroup on Endangered Species, Georg-August University of Göttingen, Germany. | Germany                                                    |
| Soomets, Elin       | Junior Research Fellow in Conservation Biology                                     | University of Tartu                                                             | Estonia                                                    |
| Soon, Xue Qi        | PhD candidate, Veterinary Science                                                  | Massey University                                                               | Malaysia                                                   |
| Sorbara, Cathy      | Neuroscience                                                                       |                                                                                 | Netherlands (the)                                          |

|                                  |                                                                      |                                                                |                                                            |
|----------------------------------|----------------------------------------------------------------------|----------------------------------------------------------------|------------------------------------------------------------|
| Soreng, Robert                   | PhD Research Associate                                               | Smithsonian Institution                                        | United States of America (the)                             |
| Soriano, Esmeralda               | PhD Student                                                          | Instituto de Biotecnología, UNAM                               | Mexico                                                     |
| Soriano Sánchez, Martha Angélica | Doctoral student on sustainability sciences                          | ENES-UNAM, Morelia                                             | Mexico                                                     |
| Soriano-Redondo, Andrea          | Associate Research Fellow                                            | University of Lisbon                                           | Portugal                                                   |
| Sorlin, Mahaut                   | PhD student, Integrative Biology                                     | University of New Orleans                                      | United States of America (the)                             |
| Sorrell, Karina                  | Ecology and Geomorphology                                            |                                                                | Australia                                                  |
| Sorsa, Tiia                      | Researcher, Social Sciences                                          | Population Reserach Institute, Family Federation of Finland    | Finland                                                    |
| Sosa, Ana                        | Biochemist - Engineer                                                | Institut de Biologie Structurale de Grenoble                   | Spain                                                      |
| Sosef, Marc                      | Senior Researcher                                                    | Meise Botanic Garden                                           | Belgium                                                    |
| Soskolne, Colin                  | Professor emeritus (Epidemiology)                                    | University of Alberta                                          | Canada                                                     |
| Sosnowski, Pierre                | PhD Student                                                          | UCLouvain                                                      | Belgium                                                    |
| SOSTHEN ALBAN VALERYN, AKIA      | PhD Student in marine science (working on tropical tuna interaction) | CRO and IRD                                                    | Côte d'Ivoire                                              |
| Soto Padilla, Andrea             | Consultant                                                           | FFUND                                                          | Netherlands (the)                                          |
| Soto-Azat, Claudio               | Director Sustainability Research Centre                              | Universidad Andres Bello                                       | Chile                                                      |
| Sotriffer, Christoph             | Professor                                                            | University of Würzburg                                         | Germany                                                    |
| Soudant, Dominique               | Engineer                                                             | IFREMER                                                        | France                                                     |
| Soulard, Christophe              | Senior Researcher                                                    | INRA                                                           | France                                                     |
| Soulen, Jeffrey                  | Adjunct Assistant Professor                                          | University of Maryland School of Medicine                      | United States of America (the)                             |
| Soulignac, Frédéric              | Postdoctoral researcher                                              | École polytechnique fédérale de Lausanne                       | Switzerland                                                |
| Soumia, FAHD                     | Full Professor/Ecology, Biodiversity Conservation                    | Faculté des Sciences de Tétouan, Université Abdelmalek Essaâdi | Morocco                                                    |
| SOUQUET, Louise                  | post-doc                                                             | MNHN                                                           | France                                                     |
| Souriau, Abel                    | PhD Candidate in Behavioural Ecology and Bioacoustic                 | Charles University (Prague)                                    | Czech Republic (the)                                       |
| Sous, damien                     | Associate Professor                                                  | Mediterranean Institute of Oceanography - University of Toulon | France                                                     |
| Sousa, Jose Paulo                | Associate Professor                                                  | Centre for Functional Ecology, University of Coimbra           | Portugal                                                   |
| Souter, Nicholas                 | Conservation Science                                                 | Conservation International                                     | Australia                                                  |
| Southern, Lara                   | PhD candidate                                                        | Max Planck Institute EVA                                       | Germany                                                    |
| Souto Melo, Uira                 | Post-doc                                                             | Max Planck Institute for molecular genetics                    | Germany                                                    |
| Souviron-Priego, Lucrecia        | PhD in Biology                                                       | (1) Universidad de Málaga and (2) Comité Español de la UICN    | Spain                                                      |
| Souza, Alexandre F               | College de professor ecology                                         | Universidade Federal do Rio Grande do Norte                    | Brazil                                                     |
| Souza, Diorge Paulo              | Research associate / Biochemistry                                    | University College London                                      | United Kingdom of Great Britain and Northern Ireland (the) |
| Souza, Jorge                     | Post-doc fellow                                                      | Instituto Nacional da Mata Atlântica - INMA                    | Brazil                                                     |
| Souza, Valeria                   | Senior researcher                                                    | Universidad NAcional Autonoma de México                        | Mexico                                                     |
| Souza, Joice                     | PhD Candidate in Ecology and Evolution                               | Universidade do Estado do Rio de Janeiro                       | Brazil                                                     |
| Souza, Andre                     | Technical Advisor Climate and Energy                                 |                                                                | Brazil                                                     |

|                              |                                                         |                                                                                         |                                                            |
|------------------------------|---------------------------------------------------------|-----------------------------------------------------------------------------------------|------------------------------------------------------------|
| Souza Dias, Pedro            | Professor                                               | Museu Nacional, Universidade Federal do Rio de Janeiro                                  | Brazil                                                     |
| Souza Dias, Arildo           | Biologist, research field - Plant and Forest Ecology    | Goethe University - Institute for Physical Geography                                    | Germany                                                    |
| Souza Neto, João Adauto      | Associate Professor / Geology                           | Federal University of Pernambuco                                                        | Brazil                                                     |
| Souza-Formigoni, Maria Lucia | Professor - Department of Psychobiology                 | UNIFESP                                                                                 | Brazil                                                     |
| Sovinee, Rudy                | Chemistry                                               | Lehigh University - '70                                                                 | United States of America (the)                             |
| Sowa, Agnieszka              | Hydrobiology                                            | University of Silesia in Katowice                                                       | Poland                                                     |
| Sox, Inge                    | PhD student                                             | University of Antwerp                                                                   | Belgium                                                    |
| Spadini, Lorenzo             | Associate Professor, Environmental Aqueous Chemistry    | University of Grenoble-Alpes, France; IGE laboratory                                    | France                                                     |
| Spaet, Julia                 | Postdoctoral Fellow                                     | University of Cambridge                                                                 | United Kingdom of Great Britain and Northern Ireland (the) |
| Spahn, Lea                   |                                                         | Philipps-Universität Marburg                                                            | Germany                                                    |
| Spall, Michael               | Senior Scientist, Physical Oceanography                 |                                                                                         | United States of America (the)                             |
| Spangenberg, Joachim H.      | Biologist (MSc), Ecologist, Economist (PhD)             | Sustainable Europe Research Institute SERI Germany                                      | Germany                                                    |
| Sparagon, Wesley             | Graduate Student                                        | University of Hawaii at Manoa                                                           | United States of America (the)                             |
| Sparks, Richard              | Aquatic Ecology                                         | University of Illinois at Urbana-Champaign                                              | United States of America (the)                             |
| Spatola, Nicolas             | Post-doc Psychology                                     | University of Potsdam                                                                   | Germany                                                    |
| Specht, Stephen              | Environmental Protection Specialist (retired)           | US Department of the Interior, Office of the Secretary, Office of Environmental Affairs | United States of America (the)                             |
| SPEDDING, Michael            | President, research company                             | Spedding Research Solutions Sas                                                         | France                                                     |
| Speed, Mark                  | PhD Hydrology                                           | University of Aberdeen                                                                  | United Kingdom of Great Britain and Northern Ireland (the) |
| Spehar, Stephanie            | Associate Professor of Anthropology                     | University of Wisconsin Oshkosh                                                         | United States of America (the)                             |
| Speich, Sabrina              | Professor of Physical Oceanography and Climate Sciences | Ecole Normale Supérieure PSL University, LMD-IPSL                                       | France                                                     |
| Speijer, Robert              | Professor in geology                                    | KU Leuven                                                                               | Belgium                                                    |
| Spence-Jones, Helen          | Evolutionary Biology                                    | University of St Andrews                                                                | United Kingdom of Great Britain and Northern Ireland (the) |
| Spencer, Hugh                | Director                                                | Australian Tropical Research Foundation                                                 | Australia                                                  |
| Spencer, Wayne               | Chief Scientist                                         | Conservation Biology Institute                                                          | United States of America (the)                             |
| Spencer, Hamish              | Professor of Zoology                                    | University of Otago                                                                     | New Zealand                                                |
| Sperandio, Giorgio           | PhD Student                                             | University of Modena and Reggio Emilia                                                  | Italy                                                      |
| Sperlea, Theodor             | Bioinformatics; Ecology                                 | Philipps-Universität Marburg                                                            | Germany                                                    |
| Spescha, Anna                | PhD student                                             | ETH Zurich                                                                              | Switzerland                                                |
| Spevak, Edward               | Curator of Invertebrates                                | Saint Louis Zoo                                                                         | United States of America (the)                             |
| Speziale, Karina             | Scientific researcher at National Research Council      | INIBIOMA (CONICET-UNCOMA)                                                               | Argentina                                                  |
| Spicer, John                 | Professor of Marine Zoology                             | University of Plymouth                                                                  | United Kingdom of Great Britain and Northern Ireland (the) |
| Spielmann, Julia             | Graduate Student                                        | University of Illinois at Urbana-Champaign                                              | United States of America (the)                             |
| Spielmann, Adriano           | Professor - Lichenology                                 | Universidade Federal de Mato Grosso do Sul                                              | Brazil                                                     |
| Spiliotopoulou, Maria        | Sustainability researcher                               |                                                                                         | Canada                                                     |

|                                       |                                                                                                                                        |                                                                                     |                                                            |
|---------------------------------------|----------------------------------------------------------------------------------------------------------------------------------------|-------------------------------------------------------------------------------------|------------------------------------------------------------|
| Spillias, Scott                       | PhD Candidate, Marine Biology                                                                                                          | University of Queensland                                                            | Australia                                                  |
| Spinelli, Silvia                      | structural biology                                                                                                                     | CNRS                                                                                | France                                                     |
| Spiro, Michel                         | Physicist Emeritus                                                                                                                     | CEA and CNRS                                                                        | France                                                     |
| Spironello, Wilson                    | Researcher                                                                                                                             | Instituto Nacional de Pesquisas da Amazonia - INPA                                  | Brazil                                                     |
| Spite, François                       | retired astronomer                                                                                                                     | Observatoire de Paris-Meudon = obspm                                                | France                                                     |
| Spitskiy, Sergey                      | Associate Professor (Docent), Department of Engineering Chemistry and Industrial Ecology (Environmental Management, Environmental Law) | Saint-Petersburg State University of Industrial Technologies and Design             | Russian Federation (the)                                   |
| Spitz, Loek                           | Mathematician                                                                                                                          | University of Amsterdam                                                             | Netherlands (the)                                          |
| Sponsel, Leslie                       | Professor Emeritus/Anthropology                                                                                                        | University of Hawai'i                                                               | United States of America (the)                             |
| Sposito, Tereza Cristina              | Researcher                                                                                                                             | Instituto Bem Ambiental                                                             | Brazil                                                     |
| Spottiswoode, Claire                  | Professor in Conservation Biology                                                                                                      | University of Cape Town                                                             | South Africa                                               |
| Spreckelsen, Florian                  | PhD student, biomedical physics                                                                                                        | Max Planck Institute for Dynamics and Self-organization                             | Germany                                                    |
| Sprenger, Matthias                    | Hydrologist                                                                                                                            | North Carolina State University                                                     | United States of America (the)                             |
| springer, sabine                      | environmental science                                                                                                                  | self employed                                                                       | Ireland                                                    |
| Springer, Vanessa                     | Environmental Scientist - Air Quality                                                                                                  | Cornell University                                                                  | United States of America (the)                             |
| Squeo, Francisco A.                   | Full Professor / Ecology                                                                                                               | University of La Serena                                                             | Chile                                                      |
| Squire, Jonathan                      | Physics                                                                                                                                | University of Otago                                                                 | New Zealand                                                |
| Srbek-Araujo, Ana Carolina            | Titular Professor                                                                                                                      | Vila Velha University                                                               | Brazil                                                     |
| Srednick, Griffin                     |                                                                                                                                        | California State University Northridge                                              | United States of America (the)                             |
| Srinivasapura Venkateshmurthy, Nikhil | Public Health                                                                                                                          | Public Health Foundation of India                                                   | India                                                      |
| Srinivasulu, Bhargavi                 | Scientist - Wildlife Biology                                                                                                           | Department of Zoology, Osmania University, Hyderabad - 500007                       | India                                                      |
| Srinivasulu, Chelmala                 | Senior Assistant Professor - Zoology/Wildlife Biology                                                                                  | Osmania University                                                                  | India                                                      |
| Sriskandarajah, Nadarajah             | Professor Emeritus for Environmental Communication                                                                                     | Swedish University of Agricultural Scientists                                       | Sweden                                                     |
| Srur, Ana                             | Resercher Dendroclimatology                                                                                                            | IANIGLA CONICET CCT Mendoza                                                         | Argentina                                                  |
| Staab, Michael                        | Assistant Professor, Ecology                                                                                                           | University of Freiburg                                                              | Germany                                                    |
| Staaks, Georg                         | Senior Scientist / Fisheries Sciences                                                                                                  | Leibniz-Institute of Freshwater Ecology and Inland Fisheries                        | Germany                                                    |
| Stacey, Adam                          | Environmental Director                                                                                                                 |                                                                                     | United Kingdom of Great Britain and Northern Ireland (the) |
| Stachowski-Haberkorn, Sabine          | Researcher, phytoplankton ecotoxicology                                                                                                | Ifremer                                                                             | France                                                     |
| Stack, Charles                        | Doctor of Public Health Candidate                                                                                                      | University of Illinois at Chicago School of Public Health                           | United States of America (the)                             |
| Stacy, Elizabeth                      | Associate Professor of Biology                                                                                                         | University of Nevada Las Vegas                                                      | United States of America (the)                             |
| Stadler, Konstantin                   | Industrial Ecology - Researcher and Lab Manager                                                                                        | Industrial Ecology Programme, Norwegian University of Science and Technology (NTNU) | Norway                                                     |
| Stafford, Richard                     | Professor of Marine Biology and Conservation                                                                                           | Bournemouth University                                                              | United Kingdom of Great Britain and Northern Ireland (the) |
| Stafford-Smith, Mary                  | Coral Reef Research Scientist                                                                                                          | Coral Reef Research, Townsville                                                     | Australia                                                  |

|                         |                                                  |                                                     |                                                            |
|-------------------------|--------------------------------------------------|-----------------------------------------------------|------------------------------------------------------------|
| Stahl, Clément          | Researcher                                       | INRA                                                | French Guiana                                              |
| Stahl-Johnson, Kristin  | Fisheries and Ocean Policy                       | OceanPeople Resources                               | United States of America (the)                             |
| Stahler, Anna-Margarete | PhD student in Evolutionary Biology              | University of St Andrews                            | United Kingdom of Great Britain and Northern Ireland (the) |
| Stals, Riaan            | Beetle researcher                                | SA National Collection of Insects                   | South Africa                                               |
| Stam, Maike             | Associate Professor/Molecular Biology            | University of Amsterdam                             | Netherlands (the)                                          |
| Stamp, Michelle         | ecologist                                        | University of Aberdeen                              | United Kingdom of Great Britain and Northern Ireland (the) |
| Stanback, Mark          | Professor of Biology                             | Davidson College                                    | United States of America (the)                             |
| Stanescu, Florina       | Research Associate/ Biology                      | Universitatea Ovidius Constanta                     | Romania                                                    |
| Stangl Jr, David        | Sociology                                        |                                                     | United States of America (the)                             |
| Stanley, Margaret       | Associate Professor                              | Biological Sciences, University of Auckland         | New Zealand                                                |
| Stanton, Kathryn        | Professor, Dept. of Physics, Astronomy & Geology | Sacramento City College                             | United States of America (the)                             |
| Stanton, Frank          | Professor of Biological Sciences (Retired)       | University of Hawai'i at Lee CC                     | United States of America (the)                             |
| Staples, Timothy        | Post-doctoral fellow, community ecology          | University of Queensland                            | Australia                                                  |
| staring, jacqueline     | postdoc (medical biology)                        | university of Copenhagen (GLOBE institute)          | Denmark                                                    |
| Stark, Scott            | Environmental Chemist                            | Australian Antarctic Division                       | Australia                                                  |
| Stark, Jonathan         | Senior Research Scientist/Marine ecology         | Australian Antarctic Division                       | Australia                                                  |
| Starke, Stephan         | PhD candidate                                    | Technical University of Berlin                      | Germany                                                    |
| stasheff, James         | Prof Emeritus - Math                             | UNC-CH                                              | United States of America (the)                             |
| Stasnik, Peter          | MSc Genetics and developmental biology           | University of Vienna                                | Austria                                                    |
| Stassen, Maurice        | PhD Medical Biology, MSc Education               |                                                     | Netherlands (the)                                          |
| Staudacher, Philipp     | Environmental Science                            | Eawag                                               | Switzerland                                                |
| Staufer, Oskar          | Scientist in Synthetic Biology                   | Max-Planck Institute for Medical Research           | Germany                                                    |
| Staufer Viveros, RAQUEL | Post-doctorate                                   | Universidade Federal de Minas Gerais                | Brazil                                                     |
| Stauvermann, Peter J.   | Professor of economics                           | Changwon National University                        | Korea (the Republic of)                                    |
| Steadman, David         | Curator                                          | University of Florida                               | United States of America (the)                             |
| Steadson, David         | Behavioural Science                              |                                                     | Sweden                                                     |
| Stearns, Stephen        | Professor of Ecology and Evolutionary Biology    | Yale University                                     | United States of America (the)                             |
| Steccari, Irene         | Ecology                                          | Universität Wien                                    | Austria                                                    |
| Steel, Duncan           | Professor, biophysics, eecs, physics             | Univ. Michigan                                      | United States of America (the)                             |
| Steel, Zachary          | Ecologist                                        | University of California, Berkeley                  | United States of America (the)                             |
| Steelman, Toddi         | Dean                                             | Nicholas School of the Environment                  | United States of America (the)                             |
| Steeves, Tammy          | Associate Professor                              | University of Canterbury                            | New Zealand                                                |
| Stefan, Christian       | Meteorology                                      | ZAMG Zentralanstalt für Meteorologie und Geodynamik | Austria                                                    |
| Stefanovic, Cordula     |                                                  | University of Natural Resources and Life Sciences   | Austria                                                    |
| Stefansson, Robert      | Director                                         | West Iceland Nature Research Centre                 | Iceland                                                    |
| Steffen, Will           | Emeritus Professor, Earth System science         | The Australian National University                  | Australia                                                  |
| Steffens, Jutta         | Lecturer in Mathematics and Statistics (PhD)     | HS Furtwangen University                            | Germany                                                    |

|                       |                                                                        |                                                                      |                                                            |
|-----------------------|------------------------------------------------------------------------|----------------------------------------------------------------------|------------------------------------------------------------|
| Steimle, Viktor       | associate professor biology                                            | Département de Biologie, Université de Sherbrooke, QC                | Canada                                                     |
| Stein, Lisa           | Professor/Microbiology                                                 | University of Alberta                                                | Canada                                                     |
| Stein, Anke           | Postdoctoral Researcher, Ecology                                       | University of Konstanz                                               | Germany                                                    |
| Stein, Staci          | Natural Resource Scientist                                             | Oregon Department Fish and Wildlife                                  | United States of America (the)                             |
| Steinberger, Bernhard | Senior Researcher; Geophysics                                          | GFZ German Research Centre for Earth Sciences                        | Germany                                                    |
| Steiner, Richard      | Professor, Marine Conservation Biology                                 | University of Alaska (retired)                                       | United States of America (the)                             |
| Steiner, William      | Dean, College of Agriculture, Forestry and Natural Resource Management | University of Hawaii, Hilo (retired)                                 | United States of America (the)                             |
| Steinmann, Marc       | Lecturer in geochemistry                                               | University of Burgundy Franche-Comté                                 | France                                                     |
| Steinnes, Lasse       | Biology                                                                |                                                                      | Norway                                                     |
| Steinrueck, Magdalena | PhD, Science Communicator, Biology & Interdisciplinary                 | IST Austria                                                          | Austria                                                    |
| Steinruecke, Peter    | Biochemist Microbiologist                                              | Industry R&D                                                         | Germany                                                    |
| Steinsson, Hlynur     | Ecologist                                                              |                                                                      | Iceland                                                    |
| Steinwandter, Michael | Soil Ecologist                                                         | Eurac Research - Institute for Alpine Environment                    | Italy                                                      |
| Stelbrink, Björn      | Postdoctoral researcher                                                | Justus Liebig University Giessen                                     | Germany                                                    |
| Stenger, Pierre-Louis | Ph. D.                                                                 | Ifremer                                                              | French Polynesia                                           |
| Stenhouse, Alan       | Conservation Technology                                                |                                                                      | Australia                                                  |
| Stenkamp, Ronald      | Professor, protein crystallography                                     | University of Washington                                             | United States of America (the)                             |
| Stenkewitz, Ute       | Wildlife Researcher, PhD                                               | University of Iceland                                                | Iceland                                                    |
| Stenøien, Hans        | Professor of biology                                                   | NTNU University Museum                                               | Norway                                                     |
| Stepanek, John        | PhD student, Coastal Ecology                                           | Oregon State University                                              | United States of America (the)                             |
| Stephan, Marco        | Mechanical Engineering and Energy Technology                           | ETH Zurich                                                           | Switzerland                                                |
| Stephan, Jörg         | Researcher                                                             | Swedish University of Agricultural Sciences                          | Sweden                                                     |
| Stephan, Kirsten      | Forestry                                                               | West Virginia University, Division of Forestry and Natural Resources | United States of America (the)                             |
| Stephen, Bruce        | Ecology                                                                |                                                                      | United States of America (the)                             |
| Stephens, Tara        | Ecologist                                                              |                                                                      | Canada                                                     |
| Stephens, Robert      | Ichthyology                                                            | Bradley University, Retired                                          | United States of America (the)                             |
| Stephens, Philip      | Ecologist                                                              | Durham University                                                    | United Kingdom of Great Britain and Northern Ireland (the) |
| Stephenson, Jessica   | Assistant Professor                                                    | University of Pittsburgh                                             | United States of America (the)                             |
| Stephenson, Janet     | Social scientist, Director, Centre for Sustainability                  | University of Otago                                                  | New Zealand                                                |
| sterling, peter       |                                                                        | university of pennsylvania                                           | United States of America (the)                             |
| Sterling, Shannon     | Associate Professor                                                    | Dalhousie University                                                 | Canada                                                     |
| Sterman, John         | Jay W. Forrester Professor of Management                               | MIT                                                                  | United States of America (the)                             |
| Sternberg, Marcelo    | Professor/Ecology                                                      | Tel Aviv University                                                  | Israel                                                     |
| Sterner, Erik O       | Researcher in pedagogics of climate change                             | University of Gothenburg                                             | Sweden                                                     |
| Sterner, thomas       |                                                                        | Univ of Gothenburg; ECONOMICS                                        | Sweden                                                     |
| Stettner, Joeran      | PhD student, Astroparticle Physics                                     |                                                                      | Germany                                                    |
| Steup, Andreas        | Biologist                                                              |                                                                      | Germany                                                    |

|                             |                                                                         |                                                                      |                                                            |
|-----------------------------|-------------------------------------------------------------------------|----------------------------------------------------------------------|------------------------------------------------------------|
| Stevens, Daniel             | PhD Student                                                             | Newcastle University                                                 | United Kingdom of Great Britain and Northern Ireland (the) |
| Stevens, Victoria           | Protected Areas Ecologist, retired                                      | British Columbia Parks                                               | Canada                                                     |
| Stevens, John               | Associate Professor Lifestyle Medicine                                  | Southern Cross University                                            | Australia                                                  |
| Steward, Peter              | Research Fellow Agricultural Climate Resilience                         | ICRAF / University of Leeds                                          | Kenya                                                      |
| stewart, gavin              | Senior lecturer in Evidence Synthesis, Director Evidence Synthesis Lab  | University of Newcastle                                              | United Kingdom of Great Britain and Northern Ireland (the) |
| Stewart, Jim R              | Physics PhD                                                             | OceanForesters                                                       | United States of America (the)                             |
| Stewart, Dorothy            | Research Officer                                                        | Environmental Protection Agency                                      | Ireland                                                    |
| Stewart, Kathryn            | Postdoctoral researcher                                                 | University of amsterdam                                              | Netherlands (the)                                          |
| Stewart, Frank              | Associate Professor                                                     | Georgia Institute of Technology                                      | United States of America (the)                             |
| Stewart, Brian              | Professor of Physics                                                    | Wesleyan University                                                  | United States of America (the)                             |
| Stewart, Ian                | PhD Candidate                                                           | MDC Berlin                                                           | Germany                                                    |
| Stewart, Robert             | Bioinformatician                                                        | Roslin Institute, University of Edinburgh                            | United Kingdom of Great Britain and Northern Ireland (the) |
| STEWART, Nola               | High School Science Teacher                                             | (Retired)                                                            | Australia                                                  |
| Stewart Merrill, Tara       | Postdoctoral Fellow                                                     | University of Colorado Boulder                                       | United States of America (the)                             |
| Sthel, Marcelo              | Research /climate change                                                |                                                                      | Brazil                                                     |
| Stift, Marc                 | Assistant Professor, Evolutionary Ecology                               | University of Konstanz                                               | Germany                                                    |
| Stiles, Daniel              | Member                                                                  | IUCN                                                                 | Kenya                                                      |
| Still, Christopher          | Associate Professor                                                     | Oregon State University                                              | United States of America (the)                             |
| Stillman, Jonathon          | Professor                                                               | San Francisco State University and University of California Berkeley | United States of America (the)                             |
| Stinus Ruiz de Gauna, Sonia | Postdoctoral researcher / Cell & molecular biology                      | CNRS                                                                 | France                                                     |
| STIRNEMANN, Aurélien        | PhD Student in Biology                                                  | Université du Québec à Montréal                                      | Canada                                                     |
| Stitelmann, Magali          | Environmental Education Officer - Botany                                | Conservatoire et Jardin botaniques de Genève                         | Switzerland                                                |
| Stobbe, Marc                | Scientific Collaborator                                                 | Hochschule Biberach                                                  | Germany                                                    |
| Stockinger, Florian         | GP in training                                                          | prvate practice                                                      | Germany                                                    |
| Stockton, Dr. Richard       | Physiology/Neurobiology                                                 | U. ar Buffalo                                                        | United States of America (the)                             |
| Stoddard, Philip            | Professor                                                               | Florida International University                                     | United States of America (the)                             |
| Stoddart, Mark              | Associate Professor of Sociology                                        | Memorial University of Newfoundland                                  | Canada                                                     |
| Stoel, Peter                | Wildlife biologist                                                      | TNC Oregon, retired                                                  | United States of America (the)                             |
| Stoelzle, Michael           | PhD, Hydrology                                                          | University of Freiburg                                               | Ghana                                                      |
| Stoett, Peter               | Dean, Faculty of Social Science and Humanities                          | Ontario Tech University                                              | Canada                                                     |
| Stoian, Dietmar             | Lead Scientist, Value Chains, Private Sector Engagement and Investments | World Agroforestry (ICRAF)                                           | Germany                                                    |
| Stojanović, Marko           | Postdoc                                                                 | Global change research institute - CzechGlobe                        | Czech Republic (the)                                       |
| Stoker, Carol               | Planetary scientist                                                     | NASA                                                                 | United States of America (the)                             |
| Stokes, Peter               | Ph.D. Candidate - Evolutionary Biology                                  | University of California, Berkeley                                   | United States of America (the)                             |
| Stokols, Daniel             | Chancellor's Professor                                                  | University of California, Irvine                                     | United States of America (the)                             |
| Stokowski, Paricia          | Professor, Natural resource and recreation social sciences              | Univeristy of Vermont                                                | United States of America (the)                             |

|                                |                                                                              |                                                                                          |                                                               |
|--------------------------------|------------------------------------------------------------------------------|------------------------------------------------------------------------------------------|---------------------------------------------------------------|
| Stoldt, Marah                  | PhD student                                                                  | Institute for Organismic and Molecular Evolution,<br>Johannes Gutenberg University Mainz | Germany                                                       |
| Stoll, Thomas                  | Mass Spectrometry                                                            | QIMR Berghofer                                                                           | Australia                                                     |
| Stoll, Alexandra               | Researcher                                                                   | CEAZA                                                                                    | Chile                                                         |
| Stompe, Dylan                  | PhD Student, Fisheries Biology                                               | UC Davis                                                                                 | United States of America (the)                                |
| Ston, Julien                   | Researcher in Material Sciences                                              | EPFL                                                                                     | Switzerland                                                   |
| Ston, Daniel                   | Biology                                                                      |                                                                                          | Switzerland                                                   |
| Stone, Michael                 | PhD Student in Geology                                                       | Louisiana State University                                                               | United States of America (the)                                |
| STONE, WILLIAM                 | DISTINGUISHED PROFESSOR OF GENETICS<br>EMERITUS                              | UNIVERSITY OF WISCONSIN                                                                  | United States of America (the)                                |
| Stonechild, Alexander          | Professor/Indigenous Studies                                                 | First Nations University of Canada                                                       | Canada                                                        |
| Storck, Pascal                 | Head of Technology, Vaisala Digital                                          | Vaisala                                                                                  | United States of America (the)                                |
| STORK, NIGEL                   | Emeritus Professor/ Environment                                              | Griffith University                                                                      | Australia                                                     |
| Stoss, MS, MLS, Frederick      | Librarian (Faculty Status as Full Professor)                                 | SUNY University at Buffalo                                                               | United States of America (the)                                |
| Stoudmann, Natasha             | Researcher, environmental sciences                                           |                                                                                          | Switzerland                                                   |
| Straehle, Uwe                  | Professor Biology                                                            | University of Heidelberg and Karlstruhe Insitute of<br>Technology                        | Germany                                                       |
| Strahl, Henrik                 | Senior Lecturer, Microbiologist                                              | Newcastle University                                                                     | United Kingdom of Great Britain<br>and Northern Ireland (the) |
| Strahm, Wendy                  | Biologist                                                                    | Nos Oiseaux                                                                              | Switzerland                                                   |
| Strasberg, Philipp             | Postdoctoral researcher in theoretical physics                               | Universitat Autònoma de Barcelona                                                        | Spain                                                         |
| Strass, Volker                 | PhD/Senior Scientist/Oceanographer                                           | Alfred-Wegener-Institut (AWI)                                                            | Germany                                                       |
| Strate, Mirian Fabiane         | Doutoranda em Desenvolvimento rural                                          | UFRGS                                                                                    | Brazil                                                        |
| Stratford, BD                  | Public Health, retired                                                       | Centers for Disease Control and Prevention, DHHS                                         | United States of America (the)                                |
| Strathdee, Steffanie           | Harold Simon Professor, Associate Dean of Global<br>Health Sciences          | University of California San Diego                                                       | United States of America (the)                                |
| Strathmann, Richard            | Professor Emeritus, Biology                                                  | University of Washington                                                                 | United States of America (the)                                |
| Strauss, W. Maartin            | Senior Lecturer / Conservatin physiology, wildlife<br>biology and management | University of South Africa                                                               | South Africa                                                  |
| Streb, Peter                   | assistant professor                                                          | Université Paris Sud                                                                     | France                                                        |
| Street, Lorna                  | Research Fellow                                                              | University of Edinburgh                                                                  | United Kingdom of Great Britain<br>and Northern Ireland (the) |
| Street-Perrott, Frances Alayne | Emeritus Professor of Science                                                | Swansea University                                                                       | United Kingdom of Great Britain<br>and Northern Ireland (the) |
| Strehl, Anna-Marie             | M.Sc. Student, Climate Physics                                               | GEOMAR                                                                                   | Germany                                                       |
| Streicher, Melanie             | PhD candidate                                                                | University of KwaZulu-Natal                                                              | South Africa                                                  |
| Stressmann, Franziska          | Postdoctoral Researcher in Microecology                                      | Institute for Freshwater Ecology and Inland Fisheries                                    | Germany                                                       |
| Streveler, Greg                | Ecology/geology                                                              | Private consultant                                                                       | United States of America (the)                                |
| Strid, Ingrid                  | Research scientist                                                           | Energy and technology, Swedsih university of<br>agricultural sciences                    | Sweden                                                        |
| Strier, Karen                  | Professor of Anthropology                                                    | University of Wisconsin-Madison                                                          | United States of America (the)                                |

|                             |                                                                       |                                                                                 |                                                            |
|-----------------------------|-----------------------------------------------------------------------|---------------------------------------------------------------------------------|------------------------------------------------------------|
| Stringer, Lindsay           | Professor in Environment and Development                              | University of Leeds                                                             | United Kingdom of Great Britain and Northern Ireland (the) |
| Stringer, Chris             | Research Leader                                                       | The Natural History Museum                                                      | United Kingdom of Great Britain and Northern Ireland (the) |
| Stritih, Ana                | PhD student, Environmental Science                                    | ETH Zürich                                                                      | Switzerland                                                |
| Strittholt, James           | President                                                             | Conservation Biology Institute                                                  | United States of America (the)                             |
| Strobl, Barbara             | PhD Researcher                                                        | University of Zurich                                                            | Switzerland                                                |
| Stroet, Marc                | PhD candidate Chemical Biology                                        | Erasmus MC                                                                      | Netherlands (the)                                          |
| Strohm, Erhard              | Professor for Evolutionary Ecology                                    | University of Regensburg                                                        | Germany                                                    |
| Strom, Doug                 | Aquatic Ecology                                                       | Water & Air Research, Inc.                                                      | United States of America (the)                             |
| Stromvik, Martina           | Associate Professor, Plant Science                                    |                                                                                 | Canada                                                     |
| Stronen, Astrid Vik         | Researcher, Department of Biology                                     | University of Ljubljana                                                         | Slovenia                                                   |
| Strong, Donald              | Professor, Dept. of Evolution and Ecology                             | University of California, Davis                                                 | United States of America (the)                             |
| Strong, Geoffrey            | Atmospheric/Climate Scientist                                         | Vanvouver Island University                                                     | Canada                                                     |
| Stróżecki, Marcin           |                                                                       | Poznan University of Life Sciences                                              | Poland                                                     |
| Struckman, Soren            | Forestry and Land Stewardship Research Technician                     | Western Forest Initiative; VA Dept. of Conservation and Recreation              | United States of America (the)                             |
| Struncova, Dagmar           | Pharmacist, PhD. student                                              | Masaryk University, Brno, Czech Republic                                        | Czech Republic (the)                                       |
| Strutt, John                | Reliability and engineering risk management (retired)                 | Astrimar Ltd                                                                    | United Kingdom of Great Britain and Northern Ireland (the) |
| Struyf, Eric                | Global Change Ecology                                                 | University of Antwerp                                                           | Belgium                                                    |
| Struzka, Eduardo Adrián     | Ingeniero en sistemas biológicos                                      | Universidad Politécnica de Cataluña                                             | Spain                                                      |
| Stuart, Robert              | Marine biology with emphasis on fisheries science                     | Retired from Amec Foster Wheeler Environment and Infrastructure                 | United States of America (the)                             |
| Stuart, Emi                 | PhD candidate                                                         | Hawkesbury Institute for the Environment                                        | Australia                                                  |
| Stubblefield, J. William    | Evolutionary Biology                                                  | Harvard                                                                         | United States of America (the)                             |
| Stucchi, Marco              | PhD in Neurobiology                                                   | International Max Planck Research School for Organismal Biology                 | Germany                                                    |
| Stuewe, Kurt                | Professor of Geology                                                  | Dept of Earth Science, University of Graz                                       | Austria                                                    |
| Stumm, Dorothea             | Glaciologist                                                          | ICIMOD (most recent association)                                                | Switzerland                                                |
| Stump, Daryl                | Department of Environment and Geography and Department of Archaeology | University of York                                                              | United Kingdom of Great Britain and Northern Ireland (the) |
| Sturm, Peter                | Computer Science                                                      | Inria                                                                           | France                                                     |
| Sturniolo, Simone           | Computational Scientist                                               | Science and Technology Facility Council                                         | United Kingdom of Great Britain and Northern Ireland (the) |
| Stutchbury, Bridget         | Professor of Biology                                                  | York University                                                                 | Canada                                                     |
| Styskel, Ed                 | Certified Wildlife Biologist                                          |                                                                                 | United States of America (the)                             |
| Suarez, Esteban             | Professor                                                             | Universidad San Francisco de Quito                                              | Ecuador                                                    |
| Suarez, Ivan Suarez da Mota | Pesquisador Científico                                                | Instituto Florestal de São Paulo - Secretaria de Infraestrutura e Meio Ambiente | Brazil                                                     |
| Suárez, Marta               | Researcher / Ecology                                                  | Ecology and Education for Sustainable Cities Association - Transitando          | Spain                                                      |

|                                |                                                      |                                                           |                                                            |
|--------------------------------|------------------------------------------------------|-----------------------------------------------------------|------------------------------------------------------------|
| Suárez-Muñoz, María            | PhD student                                          | University of Granada                                     | Spain                                                      |
| Suaud, Nicolas                 | Assistant Professor, Chemistry                       | Université Toulouse 3                                     | France                                                     |
| Subke, Jens-Arne               | Associate Professor                                  | University of Stirling                                    | United Kingdom of Great Britain and Northern Ireland (the) |
| Subrahmaniam, Harihar Jaishree | PhD student in plant ecology. genomics and evolution | INRA                                                      | France                                                     |
| Suchecki, Deborah              | Full professor of Psychobiology                      | Universidade Federal de Sao Paulo                         | Brazil                                                     |
| Sucholutsky, Ilia              | PhD Candidate, Statistics                            | University of Waterloo                                    | Canada                                                     |
| Suckow, Axel                   | Senior Research Scientist                            | CSIRO                                                     | Australia                                                  |
| sue, christian                 | professor, geosciences                               | Franche Comte University                                  | France                                                     |
| Suescun, Uxue                  | molecular biology laboratory technician              | CNRS, Laboratory EDB (evolution and biological diversity) | France                                                     |
| Sueur, Cédric                  | Animal Behaviour / Behavioural Ecology               | Université de Strasbourg                                  | France                                                     |
| SUEUR, Jérôme                  | Associate Professor                                  | Muséum national d'Histoire naturelle                      | France                                                     |
| Sugiyama, Anna                 | Assistant Professor                                  | University of Hawaii at Manoa                             | United States of America (the)                             |
| Suhm, Martin                   | Professor, Physical Chemistry                        | Goettingen University                                     | Germany                                                    |
| Sulashvili, Marika             | Family Phycisian, Medical Geneticist                 | Tbilisi State Medical University                          | Georgia                                                    |
| Sulkowska, Aleksandra          | PhD student / molecular biology                      | Warsaw University Institute of Genetic and Biotechnology  | Poland                                                     |
| Sullivan, Nicola               | Research associate, entomology                       |                                                           | New Zealand                                                |
| Sullivan, Thomas               | Research Associate                                   | The New Zealand Institute for Plant and Food Research     | New Zealand                                                |
| Sullivan, Woodruff             | Prof. of Astronomy (Emeritus)                        | Univ. of Washington                                       | United States of America (the)                             |
| Sullivan, Gregory Thomas       | Entomology & Ecology                                 | University of Queensland                                  | Australia                                                  |
| sumi, angughali                | post-doctoral researcher                             | institut Fresnel                                          | France                                                     |
| Sumida, Paulo                  | Professor of Biological Oceanography                 | University of Sao Paulo                                   | Brazil                                                     |
| Summerell, Brett               | Chief Botanist                                       | Royal Botanic Garden Sydney                               | Australia                                                  |
| Summerscales, John             | Professor of Composites Engineering                  | University of Plymouth                                    | United Kingdom of Great Britain and Northern Ireland (the) |
| Suné, Galatea                  | Biología evolutiva                                   |                                                           | Spain                                                      |
| Sunter, Emily                  | Wildlife Biologist                                   | University of British Columbia - Okanagan                 | Canada                                                     |
| Supek, Fran                    | Research Professor (computational biology)           | Institute for Research in Biomedicine                     | Spain                                                      |
| Supramaniam, Pashiini          | PhD candidate chemistry                              | Imperial College London                                   | United Kingdom of Great Britain and Northern Ireland (the) |
| Surendranadh, Parvathy         |                                                      | IST Austria                                               | Austria                                                    |
| Susko, David                   | Associate Professor, Department of Natural Sciences  | University of Michigan-Dearborn                           | United States of America (the)                             |
| Suter, Marc                    | Deputy Departmenthead, Environmental Toxicology      | Eawag                                                     | Switzerland                                                |
| Suter-Jones, Victoria          | Geriatric Medicine Doctor                            | Hywel Dda University Health Board                         | United Kingdom of Great Britain and Northern Ireland (the) |
| Sutton, Kevin                  | Science Group Leader, Food & Bioproducts Technology  | NZ Institute for Plant and Food Research                  | New Zealand                                                |
| Sutton, Alicia                 | Honourary Research Associate                         | Murdoch University                                        | Australia                                                  |
| Sutton, Paul                   | Professor of Geography and Environmental Science     | University of Denver                                      | United States of America (the)                             |

|                          |                                            |                                                                                        |                                                            |
|--------------------------|--------------------------------------------|----------------------------------------------------------------------------------------|------------------------------------------------------------|
| suzuki, david            | emeritus professor of biology              | university of british columbia                                                         | Canada                                                     |
| Suzuki, Marcelino        | Director                                   | Sorbonne Univ. CNRS Laboratory of Microbial Biodiversity and Biotechnology             | France                                                     |
| Suzuri, Jiro             | Associate Professor                        | School of Forensic Science, National Autonomous University of Mexico                   | Mexico                                                     |
| Svanbäck, Richard        | Associate Professor in Animal Ecology      | Uppsala University                                                                     | Sweden                                                     |
| Svanström, Magdalena     | Professor, Environmental Systems Analysis  | Dept Technology Management and Economics, Chalmers University of Technology            | Sweden                                                     |
| Svensson, Jonas          | Postdoc Environmental Science              | Finnish Meteorological Institute                                                       | Finland                                                    |
| Svensson, Magdalena      | Primatology                                | Oxford Brookes University                                                              | United Kingdom of Great Britain and Northern Ireland (the) |
| Svimonoff, Constantine   | Emergency Physician                        |                                                                                        | United States of America (the)                             |
| SVISTOONOFF, Sergio      | Researcher                                 | IRD                                                                                    | France                                                     |
| Svitková, Ivana          | researcher                                 | Institute of Botany, Plant Science and Biodiversity Center, Slovak Academy of Sciences | Slovakia                                                   |
| Svitok, Marek            | Ecology                                    | Faculty of Ecology and Environmental Sciences, Technical University in Zvolen          | Slovakia                                                   |
| Swaegers, Janne          | Evolutionary biology                       | Lund University                                                                        | Belgium                                                    |
| Swaminathan, Sivakumar   | Scientist                                  | Bombay Natural History Society                                                         | India                                                      |
| Swan, Kelly              | Conservation Biologist                     | Calgary Zoological Society                                                             | Canada                                                     |
| Sweet, Michael           | Associate Professor                        | University of Derby                                                                    | United Kingdom of Great Britain and Northern Ireland (the) |
| Sweetlove, Maxime        | PhD. in microbiology/biogeography          | Royal Belgian Institute of Natural Sciences                                            | Belgium                                                    |
| Swergold, Gary           | Md, PhD, Genetics, Drig Development        | GSDx                                                                                   | United States of America (the)                             |
| Swetnam, Thomas          | Regents Professor, Emeritus                | University of Arizona                                                                  | United States of America (the)                             |
| Świerkosz, Krzysztof     | Associate Professor, Vegetation Ecology    | Museum of Natural History Wroclaw University                                           | Poland                                                     |
| Swietoslowski, Michal    | Assistant Professor                        | Jagiellonian University, Faculty of Chemistry                                          | Portugal                                                   |
| Swift, Rene              |                                            | Scottish Oceans Institute, University of St. Andrews                                   | United Kingdom of Great Britain and Northern Ireland (the) |
| Swift, Michael           | Director (Retired)                         | Tropical Soil Biology and Fertility Institute                                          | Kenya                                                      |
| Swinnen, Kristijn        | PhD Biology                                | Natuurpunt                                                                             | Belgium                                                    |
| Syangbo, Anjalee         | Biomedical Sciences                        | University of Bristol                                                                  | United Kingdom of Great Britain and Northern Ireland (the) |
| Sylvan, Jason            | Assistant Professor                        | Texas A&M University                                                                   | United States of America (the)                             |
| sylvander, matthieu      | assistant professor - geophysics           | Observatoire Midi-Pyrénées                                                             | France                                                     |
| SYLVIE, HOUTÉ            | ENGINEER                                   | CNRS                                                                                   | France                                                     |
| Systad, Geir             | Scientific Researcher in Ecology           | Norwegian Institute for Nature Research                                                | Norway                                                     |
| Szabo, Judit             | Professora Visitante                       | UFBA                                                                                   | Brazil                                                     |
| Szabó, Attila            | Associate professor                        | Debrecen University                                                                    | Hungary                                                    |
| Szasz, Andrew            | Professor Emeritus                         | University of California, Santa Crzu                                                   | United States of America (the)                             |
| Szendro Morales, Enrique | Coordinator for Sustainable Urban Projects | Sustainable Development Ministry of Nuevo Leon, Mexico                                 | Mexico                                                     |

|                      |                                                              |                                                                                         |                                                            |
|----------------------|--------------------------------------------------------------|-----------------------------------------------------------------------------------------|------------------------------------------------------------|
| Szewczyk, Tim        | Postdoctoral Associate                                       | University of Lausanne                                                                  | Switzerland                                                |
| Szitar, Katalin      | Biologist, Scientific research assistant                     | MTA Centre for Ecological Research                                                      | Hungary                                                    |
| Szito, Andras        | entomologus/curator                                          | Dept of Primary Industries & RD Western Australia                                       | Australia                                                  |
| Szyja, Michelle      | Scientific assistant and PhD student in Ecology              | Technische Universität Kaiserslautern                                                   | Germany                                                    |
| Szymankiewicz, James | Medical doctor                                               | Centre for Sustainable Healthcare                                                       | United Kingdom of Great Britain and Northern Ireland (the) |
| Tabak, Nava          | Director of Conservation Science                             | Scenic Hudson                                                                           | United States of America (the)                             |
| Taber, Christopher   | Sports Physiology and Performance                            | Sacred Heart University                                                                 | United States of America (the)                             |
| Tablado, Alejandro   | Curator of the National Collection of Invertebrates          | Museo Argentino de Ciencias Naturales "Bernardino Rivadavia"                            | Argentina                                                  |
| Taboada, Sergi       | Postdoctoral researcher, Marine Biologist                    | Universidad Autónoma de Madrid                                                          | Spain                                                      |
| Taborski, Tom        | Phd in ecophysiology                                         | INRA                                                                                    | France                                                     |
| Taccoen, Adrien      | PhD Student, Forest Ecology                                  | AgroParisTech                                                                           | France                                                     |
| Tacconi, Luca        | Professor                                                    | Crawford School of Public Policy, The Australian National University                    | Australia                                                  |
| Tadich, Tamara       | Associate Professor PhD Veterinary Sciences - Animal Welfare | Universidad de Chile                                                                    | Chile                                                      |
| Tadier, Solène       | Assistant Professor / Material Sciences                      | INSA Lyon, Univ. Lyon                                                                   | France                                                     |
| Taft, Jody M.        | Herpetologist                                                | South African National Biodiversity Institute                                           | South Africa                                               |
| Tagg, Nikki          | Conservation Scientist                                       | The Born Free Foundation                                                                | United Kingdom of Great Britain and Northern Ireland (the) |
| Taggart, Mark        | Senior Research Fellow                                       | University of the Highlands and Islands                                                 | United Kingdom of Great Britain and Northern Ireland (the) |
| Taggart, Patrick     | Ecology                                                      | Vertebrate Pest Research Unit, Department of Primary Industries, NSW Government         | Australia                                                  |
| Tagle, Ximena        | Forestry researcher                                          | Instituto de Investigaciones de la Amazonía Peruana/ Wageningen University and Research | Peru                                                       |
| Tagüeña, Julia       | Researcher (Physics)                                         | Universidad Nacional Autónoma de México                                                 | Mexico                                                     |
| TAHA, ELZUBEIR       | RECTOR                                                       | NAPATA UNIVERSITY COLLEGE , KHARTOUM                                                    | Sudan (the)                                                |
| Tai, Ying-Feng       | Sociology                                                    | NCCU                                                                                    | Taiwan                                                     |
| Taieb, Maurice       | Honorary Scholar                                             | AIX Marseille University-CNRS-IRD-INRA-                                                 | France                                                     |
| Taiti, Stefano       | Zoology                                                      | National Research Council                                                               | Italy                                                      |
| Taiz, Lincoln        | Professor Emeritus, MCD Biology                              | University of California, Santa Cruz                                                    | United States of America (the)                             |
| Takacs, George       | Senior lecturer, Physics                                     | University of Wollongong                                                                | Australia                                                  |
| Takaro, Tim K        | Professor and Associate Dean for Research                    | Faculty of Health Sciences, Simon Fraser University                                     | Canada                                                     |
| Takerkart, Sylvain   | Neuroscience, Computer Science                               | Centre National de la Recherche Scientifique (CNRS)                                     | France                                                     |
| Taklis, Christos     | Marine & Conservation Biologist                              |                                                                                         | Greece                                                     |
| Takolander, Antti    | Research Scientist, Ecology                                  | Natural Resources Institute Finland                                                     | Finland                                                    |
| Takriti, Mounir      | Research Associate in Environmental Science                  | Lancaster University                                                                    | United Kingdom of Great Britain and Northern Ireland (the) |
| Talbi, Roy           | PhD student                                                  | University of Haifa                                                                     | Israel                                                     |
| Talbot, Julie        | Department of Geography                                      | Universite de Montreal                                                                  | Canada                                                     |

|                                                     |                                                                                        |                                                                                                    |                                |
|-----------------------------------------------------|----------------------------------------------------------------------------------------|----------------------------------------------------------------------------------------------------|--------------------------------|
| Talebi, Mauricio                                    | Associate Professor                                                                    | Federal University of São Paulo, Campus Diadema, Environmental Sciences Dept.                      | Brazil                         |
| TALEBI, MAURICIO                                    | Associate Professor, Biological Anthropology & Conservation Biology                    | Universidade Federal de São Paulo, Departamento de Ciências Ambientais, Campus Diadema, SP, Brazil | Brazil                         |
| Talebi Darestani, Mojdeh                            | PhD student in Cell and Molecular Biology                                              | Heidelberg University                                                                              | Germany                        |
| Talhadas Marques Barbosa de Madureira, Maria do Céu | Researcher                                                                             | Centre for Functional Ecology University of Coimbra                                                | Portugal                       |
| Talhadas Santos, Paulo                              | Assistant Professor /Ecology                                                           | University of Porto                                                                                | Portugal                       |
| Tallent, Nita                                       | Scientist & Public Fervent (Retired)                                                   | US Department of Interior                                                                          | United States of America (the) |
| Talley, Drew                                        | Biological Oceanography                                                                | University of San Diego                                                                            | United States of America (the) |
| Talley, Nicholas                                    | Laureate Professor, Medicine                                                           | University of Newcastle, Australia                                                                 | Australia                      |
| Tamarit, Daniel                                     | Postdoctoral researcher                                                                | Wageningen University                                                                              | Netherlands (the)              |
| Tamburino, Lucia                                    | Ecology                                                                                | SLU (Swedish University of Agricultural Sciences)                                                  | Sweden                         |
| Tames, Maria Florencia                              | PhD                                                                                    | Grupo de Estudios Atmosféricos y Ambientales                                                       | Argentina                      |
| Tamir, Dan                                          | Research Associate                                                                     | Dept. of Evolutionary Biology and Environmental Studies, University of Zurich                      | Switzerland                    |
| Tamme, Riin                                         | Senior Specialist in Macroecology                                                      | University of Tartu                                                                                | Estonia                        |
| Tammemae, Kalle                                     | Assoc. Professor                                                                       | Tallinn University of Technology                                                                   | Estonia                        |
| Tanabe, Lyndsey                                     | PhD Marine Science                                                                     | King Abdullah University of Science and Technology                                                 | Saudi Arabia                   |
| Tanchez, Karla                                      | Psychologist                                                                           | College of Southern Nevada                                                                         | United States of America (the) |
| Tang, Tong Bor                                      | Emeritus professor of physics (HKBU); Honorary prof. (Southeast Univ., Nanjing, China) | Hong Kong Baptist University                                                                       | Hong Kong                      |
| Tanguay, Louis                                      | Post-doc researcher                                                                    | University of Quebec in Montreal                                                                   | Canada                         |
| Tanneberger, Franziska                              | Researcher, Director Greifswald Mire Centre                                            | Greifswald University                                                                              | Germany                        |
| Tanner, Stephen                                     | Principal Scientist at biotechnology company                                           | UCSD                                                                                               | United States of America (the) |
| Tannier, Cécile                                     | Senior researcher - Geography                                                          | National Centre for Scientific Research                                                            | France                         |
| Tannier, Eric                                       | Researcher                                                                             | Inria                                                                                              | France                         |
| Tantoh, Henry                                       | Researcher in Environmental Management and Sustainability                              | Unisa                                                                                              | South Africa                   |
| Tapley, David                                       | Professor of Biology                                                                   | Salem State University                                                                             | United States of America (the) |
| Tapolczai, Kálmán                                   | Postdoctoral Researcher / Freshwater biology                                           | Hungarian Academy of Science (MTA) / University of Pannonia                                        | Hungary                        |
| Tarasov, Lev                                        | Professor, earth system dynamics                                                       | Memorial University of Newfoundland and Labrador                                                   | Canada                         |
| Tarayre, Michèle                                    | assistant professor                                                                    | university Rennes                                                                                  | France                         |
| Tardif, Stacie                                      | PhD                                                                                    | University of Copenhagen                                                                           | Denmark                        |
| Tarducci, Luca                                      | Medical doctor                                                                         | University of Pisa                                                                                 | Italy                          |
| Tarroux, Arnaud                                     | Research et                                                                            | Norwegian Institute for Nature Research                                                            | Norway                         |
| Tarszisz, Esther                                    | Veterinarian and Biologist                                                             |                                                                                                    | Australia                      |
| Tartari, Gianni                                     | Associate Senior Researcher                                                            | Water Research Institute-National Research Council                                                 | Italy                          |
| Tasca, Fabiane                                      | Environmental engineer                                                                 | Federal University of Santa Catarina                                                               | Brazil                         |
| Taschner, Michael                                   | Postdoctoral researcher                                                                | University of Lausanne                                                                             | Switzerland                    |
| Tasdemir, Burcu                                     | Master student - Structural geology                                                    | University of Bonn                                                                                 | Germany                        |

|                                 |                                                            |                                                                                   |                                                            |
|---------------------------------|------------------------------------------------------------|-----------------------------------------------------------------------------------|------------------------------------------------------------|
| Tasker, Roy                     | Adjunct Professor of Chemistry                             | Western Sydney University                                                         | Australia                                                  |
| Tatarnic, Nikolai               | Curator of Entomology                                      | Western Australian Museum                                                         | Australia                                                  |
| Tate, Janet                     | Professor of Physics                                       | Oregon State University                                                           | United States of America (the)                             |
| Tatiana, Severin                | postdoc in marine biology                                  | W.K. Kellogg Biological Station, Michigan State University                        | United States of America (the)                             |
| Tatischeff, Vincent             | Astrophysicist / CNRS director of research                 | CSNSM, CNRS and Univ Paris-Sud, Université Paris Saclay                           | France                                                     |
| Tatum, Natalie                  | Research Associate                                         | Newcastle University                                                              | United Kingdom of Great Britain and Northern Ireland (the) |
| Taubes, Hannibal                | PhD Student                                                | UC Berkeley                                                                       | United States of America (the)                             |
| Taucce, Pedro                   | Postdoctoral Fellow, Zoology                               | São Paulo State University                                                        | Brazil                                                     |
| Taucher, Jan                    | Scientist, Biological Oceanography                         | GEOMAR                                                                            | Germany                                                    |
| Taupin, jean-denis              | Senior Researcher- Geochemistry and Isotope in water cycle | Institut de Recherche pour le Développement/Univ. de Montpellier                  | France                                                     |
| Tausan, Ioan                    | Lecturer                                                   | Lucian Blaga University of Sibiu                                                  | Romania                                                    |
| Tavares, Diogo                  | PhD candidate                                              | University of Lausanne                                                            | Switzerland                                                |
| Tavares, Daniela                | PhD student                                                | Centre for Functional Ecology, Department of Life Sciences, University of Coimbra | Portugal                                                   |
| Tavares Azevedo Vieira, Leandro | Plant Ecology                                              | Universidade Presbiteriana Mackenzie                                              | Brazil                                                     |
| Tavares Wahren, Filipa          | Researcher                                                 | Institute of Soil Science and Site Ecology, TU Dresden                            | Germany                                                    |
| Tavaud-Pirra, Muriel            | Assistant professor in Genetics                            | Montpellier SupAgro                                                               | France                                                     |
| Tavera, Jose                    |                                                            | Universidad Del Valle                                                             | Colombia                                                   |
| Taviani, Marco                  | Research Director                                          | Italian National Research Council (CNR)                                           | Italy                                                      |
| Taylor, Nicola                  | Research scientist                                         |                                                                                   | United Kingdom of Great Britain and Northern Ireland (the) |
| Taylor, Nigel                   | Postdoctoral Researcher                                    | Tour du Valat, Research Institute for the Conservation of Mediterranean Wetlands  | France                                                     |
| Taylor, Subhashni               | Senior Lecturer in Science Education                       | James Cook University                                                             | Australia                                                  |
| Taylor, Alison                  | Professor                                                  | University of North Carolina Wilmington                                           | United States of America (the)                             |
| Taylor, Nicole                  | Life Science educator/ Honours in Physiology               |                                                                                   | South Africa                                               |
| Taylor, Mark                    | Environmental Scientist                                    | University of Queensland                                                          | Australia                                                  |
| Taylor, Caz                     | Ecologist                                                  | Tulane University                                                                 | United States of America (the)                             |
| Taylor, Gavin                   | Computational biologist                                    |                                                                                   | Brazil                                                     |
| Taylor, Graeme                  | Adjunct Fellow, Global Change Institute                    | University of Queensland                                                          | Australia                                                  |
| Taylor, John W.                 | Professor, Evolution, Ecology, Mycology                    | University of California                                                          | United States of America (the)                             |
| Taylor, Eliot                   | Consultant Environmental Scientist                         | Mott MacDonald                                                                    | Rwanda                                                     |
| Taylor, Liam                    | PhD Student in Glaciology                                  | University of Leeds                                                               | United Kingdom of Great Britain and Northern Ireland (the) |
| Taylor, Christopher             | Professor, Aquatic Ecology                                 | University of Texas Rio Grande Valley                                             | United States of America (the)                             |
| Tayyab, Mustafa                 | Scientist                                                  | Jawaharlal Nehru Madical College India                                            | India                                                      |
| te Brinke, Esra                 | Food safety researcher                                     | Wageningen University & Research                                                  | Netherlands (the)                                          |
| Tedesco, Anazelia               | PhD Candidate, Forest Restoration                          | The University of Queensland                                                      | Australia                                                  |

|                            |                                                              |                                                                       |                                                            |
|----------------------------|--------------------------------------------------------------|-----------------------------------------------------------------------|------------------------------------------------------------|
| Tedesco, Letizia           | Senior Research Scientist - Oceanography                     | Finnish Environment Institute                                         | Finland                                                    |
| Teele, Rebecca             | Ecologist                                                    |                                                                       | New Zealand                                                |
| Teertstra, David           | senior researcher PhD materials science Univ. Manitoba       | Union of Canadians                                                    | Canada                                                     |
| Tefsen, Boris              | Senior Associate Professor Molecular Microbiology            | Xi'an Jiaotong-Liverpool University                                   | China                                                      |
| Tegen, Ina                 | Atmospheric Sciences                                         | Leibniz Institute for Tropospheric Research                           | Germany                                                    |
| Teixeira, Daniella         | Conservation science                                         | University of Queensland                                              | Australia                                                  |
| Teixeira, Carlos           | Post-Doctoral Researcher                                     | University of Lisbon; Instituto Superior Técnico (IST)                | Portugal                                                   |
| Teixeira, Juliana          | PhD student                                                  | Universidade Estadual Paulista - Rio Claro - Departamento de Botânica | Brazil                                                     |
| Teixeira Brandao, Maria    | Engineer                                                     | Université de Bourgogne                                               | France                                                     |
| Tejeda-Martinez, Adalberto | Researcher                                                   | Universidad Veracruzana                                               | Mexico                                                     |
| Teles, Aristônio           | Professor / Plant Taxonomy                                   | Universidade Federal de Goiás                                         | Brazil                                                     |
| Tella, José L.             | Professor, Conservation Biology                              | Estación Biológica de Doñana (CSIC)                                   | Spain                                                      |
| Tellier, Aurelien          | Professor for Population Genetics                            | Technical University of Munich                                        | Germany                                                    |
| Telnov, Dmitry             | Biology (zoology, nature conservation)                       | Natural History Museum, London                                        | United Kingdom of Great Britain and Northern Ireland (the) |
| Temino-Boes, Regina        | Water and Environmental Engineering                          | Universitat Politècnica de València                                   | Spain                                                      |
| Temperton, Vicky           | Full Professor of Ecology                                    | Leuphana University Lüneburg                                          | Germany                                                    |
| Templ, Barbara             | Scientific Project Manager                                   | Potsdam Institute for Climate Impact Research                         | Germany                                                    |
| Templado, José             |                                                              | Spanish Research Council (CSIC)                                       | Spain                                                      |
| ten Hooven, Freddy         | Research technician                                          | Netherlands Institute of Ecology                                      | Netherlands (the)                                          |
| ten Veldhuis, Marie-claire | Associate professor                                          | Delft University of Technology                                        | Netherlands (the)                                          |
| Tenan, Simone              | Tenured Researcher                                           | MUSE - Museo delle Scienze di Trento                                  | Italy                                                      |
| Teneta-Skwiercz, Dorota    | Wroclaw University of Economics Professor                    | Szanowna Pani                                                         | Poland                                                     |
| Tennessen, Jacob           | Research Associate, Immunology and Infectious Diseases       | Harvard T.H. Chan School of Public Health                             | United States of America (the)                             |
| Tenzer, Selina             | PhD Soil Scientist                                           |                                                                       | Germany                                                    |
| Tenzin, Jinba              |                                                              | National University of Singapore                                      | Singapore                                                  |
| Teplitsky, Celine          | Evolutionary Biologist                                       | CNRS                                                                  | France                                                     |
| Terasmaa, Jaanus           | Senior Researcher                                            | Institute of Ecology at Tallinn University                            | Estonia                                                    |
| TerBeek, Emma              | Environmental Engineer                                       | University of Michigan                                                | United States of America (the)                             |
| Terborgh, John             | Professor Emeritus of Environmental Science                  | Duke University                                                       | United States of America (the)                             |
| Teren, Gabriella           | Ecologist                                                    | University of the Witwatersrand                                       | South Africa                                               |
| Terli, Özden               | Meteorologist (Diploma) on Screen/ Climate Communicator      | German Television                                                     | Germany                                                    |
| Termentzidis, Konstantinos | CNRS researcher, Physics                                     | CNRS                                                                  | France                                                     |
| Terpitz, Ulrich            | Lecturer                                                     | Julius Maximilian University Wuerzburg                                | Germany                                                    |
| Terraube, Julien           | Senior Research Fellow-Ecology and Biodiversity Conservation | University of Helsinki                                                | Finland                                                    |
| Terseleer, Nathan          | Marine ecosystems                                            | Royal Belgian Institute of Natural Sciences                           | Belgium                                                    |
| Terstiege, Thomas          | Cognitive Science (Linguistics / Computer Science)           |                                                                       | Germany                                                    |

|                                  |                                                           |                                                                    |                                                            |
|----------------------------------|-----------------------------------------------------------|--------------------------------------------------------------------|------------------------------------------------------------|
| Teruel Montejano, Santiago Ramón | Biologia                                                  | Parotets S.O.C.V.                                                  | Spain                                                      |
| Tessema, Mekbebe                 | Biodiversity & Environmental Conservation                 | Independent                                                        | Ethiopia                                                   |
| TESSER, CHARLES                  | Associate Professor of Public Health                      | Federal University of Santa Catarina                               | Brazil                                                     |
| Tettamanti, Gianluca             | Associate Professor                                       | University of Insubria                                             | Italy                                                      |
| Tettelbach, Stephen              | Professor Emeritus of Biology                             | Long Island University                                             | United States of America (the)                             |
| Teubler, Franziska               | Postdoctoral Researcher/ Atmospheric Physics              | Johannes Gutenberg-University Mainz                                | Germany                                                    |
| Teufel, Robin                    | Microbiology                                              |                                                                    | Germany                                                    |
| Teurlings, Peter                 | Professional Natural Scientist (Environmental Discipline) | South African Council for Natural Scientific Professions (SACNASP) | South Africa                                               |
| Thackeray, Stephen               | Freshwater ecologist                                      |                                                                    | United Kingdom of Great Britain and Northern Ireland (the) |
| Thakuri, Sudeep                  | Associate Professor                                       | Tribhuvan University, Central Department of Environmental Science  | Nepal                                                      |
| Thalmann, Philippe               | Professor of environmental economics                      | École Polytechnique Fédérale de Lausanne                           | Switzerland                                                |
| Thaman, Randy                    | Emeritus Professor of Pacific Islands Biogeography        | University of the South Pacific                                    | Fiji                                                       |
| Thammineni, Pullaiah             | Professor of Botany                                       | Sri Krishnadevaraya University                                     | India                                                      |
| Thandar, Ahmed                   | Emeritus Professor                                        | University of KwaZulu-Natal                                        | South Africa                                               |
| Thapa, Lal                       | Asst. Professor                                           | Central Department of Botany, Tribhuvan University                 | Nepal                                                      |
| Thapa, Philipp                   | Environmental Philosophy, Social Ecology                  | University of Greifswald                                           | Germany                                                    |
| Thayer, Margaret                 | Curator Emerita of Insects                                | Field Museum of Natural History                                    | United States of America (the)                             |
| Theau, Jerome                    | Professor                                                 | Université de Sherbrooke                                           | Canada                                                     |
| Theirlynck, Tom                  | PhD candidate                                             | Royal Netherlands Institute for Sea Research (NIOZ)                | Netherlands (the)                                          |
| Theis-Broehl, Katharina          | Professor in Physics                                      | University of Applied Sciences Bremerhaven                         | Germany                                                    |
| Thel, Lucie                      | PhD student in evolutionary biology                       | LBBE - University of Lyon                                          | France                                                     |
| Théo, Damasio                    | Scientific intern in ecology                              | IRSTEA                                                             | France                                                     |
| theobald, emma                   | Bioscience                                                | University of Exeter                                               | United Kingdom of Great Britain and Northern Ireland (the) |
| Theodor, Jessica                 | Professor, Biological Sciences                            | University of Calgary                                              | Canada                                                     |
| Theodorakakis, Marios            | Forester, Environmentalist PhD                            | AMBIO S.A.                                                         | Greece                                                     |
| Theodorou, Ioannis               | PhD, Macroalgal morphogenesis                             | Station Biologique de Roscoff                                      | France                                                     |
| Theofilos, Poutahidis            | Professor, Veterinary Pathology                           | Aristotle University of Thessaloniki                               | Greece                                                     |
| Theraulaz, Guy                   | Research Director at CNRS, Collective Animal behavior     | Centre National de la Recherche Scientifique                       | France                                                     |
| Theurillat, Jean-Paul            | Vegetation science                                        | University of Geneva                                               | Switzerland                                                |
| Thevelein, Johan                 | Professor in Molecular Cell Biology and Biotechnology     | VIB & KU Leuven                                                    | Belgium                                                    |
| THEVENIN, Charles                | PhD in Biological Conservation                            | Sorbonne Université                                                | France                                                     |
| Thewlis, Richard                 | Ecologist                                                 | Aecom                                                              | United Kingdom of Great Britain and Northern Ireland (the) |
| Thibault, Nicolas                | Lecturer in Geology                                       | University of Copenhagen                                           | Denmark                                                    |
| THIEBEAU, Pascal                 | Agronome                                                  | INRA                                                               | France                                                     |
| Thiel, Joana                     | Microbial Ecology                                         | University of Konstanz                                             | Germany                                                    |
| Thiele, Torsten                  | Senior Research Associate                                 | IASS                                                               | Germany                                                    |

|                        |                                                    |                                                                  |                                                            |
|------------------------|----------------------------------------------------|------------------------------------------------------------------|------------------------------------------------------------|
| Thiele, Christina      | PhD researcher Environmental Science               | University of Southampton                                        | United Kingdom of Great Britain and Northern Ireland (the) |
| Thierry, Chloé         | Ecology                                            | Muséum national d'Histoire naturelle                             | France                                                     |
| Thierry, Anne-Mathilde | Polar Biology                                      | Norwegian Institute for Nature Research                          | France                                                     |
| Thiery, Wim            | Professor climate science                          | Vrije Universiteit Brussel                                       | Belgium                                                    |
| Thioulouse, Jean       | Senior scientist biostatistics                     | CNRS                                                             | France                                                     |
| Thirel, Guillaume      | Hydrologist                                        | Irstea                                                           | France                                                     |
| Thirumalai, Avinash    | postdoc                                            |                                                                  | India                                                      |
| Tholen, Danny          | Plant Physiologist                                 | University of Natural Resources and Life Sciences, Vienna (BOKU) | Austria                                                    |
| Thomas, Kelly          | Ecologue                                           | Wild - AFIE                                                      | France                                                     |
| Thomas, Alexander      | PhD student in Environmental Sciences              | SUSTech                                                          | China                                                      |
| Thomas, Evert          | scientist forest genetic resources                 | Bioversity International                                         | Peru                                                       |
| Thomas, Haydn          | Ecology                                            | University of Edinburgh                                          | United Kingdom of Great Britain and Northern Ireland (the) |
| Thomas, Chris D        | Professor of Biology                               | University of York                                               | United Kingdom of Great Britain and Northern Ireland (the) |
| Thomas, Heather        | Paediatrician                                      | Wexham Park Hospital                                             | United Kingdom of Great Britain and Northern Ireland (the) |
| Thomas, Zahra          | Associate professor                                | AGROCAMPUS OUEST                                                 | France                                                     |
| Thomas, Pascal         | Professor of mathematics                           | Institut de Mathématiques de Toulouse (Université Paul Sabatier) | France                                                     |
| Thomas, Kent           | Civil and Disaster Prevention Engineering          | National Taipei University of Technology                         | Taiwan                                                     |
| Thomas, Camille        | Geologist-Geomicrobiologist                        | University of Geneva                                             | Switzerland                                                |
| Thomas, Hoaka          | Graduate Assistant                                 | University of Hawaii at Mānoa                                    | United States of America (the)                             |
| Thomas, Richard        | Professor (retired), Biology Department            | University of Puerto Rico                                        | Puerto Rico                                                |
| Thomas, Peyton         | Graduate Student- Biology and Marine Biology       | UNC-Wilmington                                                   | United States of America (the)                             |
| Thomas, Lindsey        | Environmental Scientist                            | EPM                                                              | United States of America (the)                             |
| Thomas, Alex           | Honorary Research Fellow in Health Informatics     | University of Melbourne                                          | Australia                                                  |
| Thomas-Bulle, Camille  | PhD student in Evolution                           | Sorbonne Université                                              | France                                                     |
| Thomason, Michael      | Director, Physics Learning Laboratories            | UC Boulder Physics                                               | United States of America (the)                             |
| Thomaz, Sidinei Magela | Professor of Ecology                               | Universidade Estadual de Maringá                                 | Brazil                                                     |
| Thomborson, Barbara    | lecturer in Academic communication                 |                                                                  | New Zealand                                                |
| Thomborson, Clark      | Professor, Computer Science                        | University of Auckland                                           | New Zealand                                                |
| thompson, joanne       | Senior Lecturer                                    | School of Biological Sciences, University of Edinburgh           | United Kingdom of Great Britain and Northern Ireland (the) |
| Thompson, Madalynn     | Masters Student                                    | University of Calgary                                            | Canada                                                     |
| Thompson, Troy         | Hydrogeologist                                     |                                                                  | United States of America (the)                             |
| Thompson, Connor       | Ph.D. Candidate in Environmental and Life Sciences | Trent University                                                 | Canada                                                     |
| Thompson, Megan        | Researcher - Wildlife Biology                      | University of Ottawa                                             | Canada                                                     |
| Thompson, Jeffrey      | Research Scientist                                 | Guyra Paraguay - CONACYT                                         | Paraguay                                                   |

|                               |                                                                                      |                                                                       |                                                            |
|-------------------------------|--------------------------------------------------------------------------------------|-----------------------------------------------------------------------|------------------------------------------------------------|
| Thompson, Kirsten             | Ecologist                                                                            | University of Exeter                                                  | United Kingdom of Great Britain and Northern Ireland (the) |
| Thompson, Nicola              |                                                                                      | Wellcome sanger Institute                                             | United Kingdom of Great Britain and Northern Ireland (the) |
| Thompson, Kristin             | PhD researcher                                                                       | University of Exeter                                                  | United Kingdom of Great Britain and Northern Ireland (the) |
| Thompson, Alton C.            | Retired; Ph. D. in Urban Economic Geography                                          | Miami University                                                      | United States of America (the)                             |
| Thompson, Claire              | Naturalist                                                                           | Nature Vision                                                         | United States of America (the)                             |
| Thomschke, Susan              | PhD Candidate Geography                                                              | University of Bayreuth                                                | Germany                                                    |
| Thomsen, Corrina              | Plant-Soil Ecology                                                                   | UBC Okanagan                                                          | Canada                                                     |
| Thomson, Robert               | Senior Lecturer                                                                      | FitzPatrick Institute of African Ornithology, University of Cape Town | South Africa                                               |
| Thomson, Jordan               | PhD Ecology                                                                          | –                                                                     | Canada                                                     |
| Thomson, Jordy                | Ecology and Conservation                                                             | Ecology Action Centre                                                 | Canada                                                     |
| Thöni, Armel                  | software development engineer, modelizing of natural processes under human influence | INRA Montpellier                                                      | France                                                     |
| Thoral, Francois              | PhD Student                                                                          | University of Canterbury                                              | New Zealand                                                |
| Thoresen, Joshua              | Ecology                                                                              | University of Cape Town                                               | South Africa                                               |
| Thorn, Jessica                | Climate change adaptation                                                            | University of York, University of Cape Town                           | Namibia                                                    |
| THORNER, Jeremy               | Professor of Biochemistry, Biophysics & Structural Biology                           | University of California, Berkeley                                    | United States of America (the)                             |
| Thornton, Alex                | Associate Professor; Centre for Ecology and Conservation                             | University of Exeter, Penryn Campus                                   | United Kingdom of Great Britain and Northern Ireland (the) |
| Thornton, Catherine           | Marine Biology                                                                       | Shaw Centre for the Salish Sea                                        | Canada                                                     |
| Thorsteinsdottir, Solveig     | Associate Professor, Biology                                                         | University of Lisbon, Faculty of Sciences                             | Portugal                                                   |
| Thrift-Viveros, Dalina        | Pollution Response Chemist                                                           | National Oceanic and Atmospheric Administration                       | United States of America (the)                             |
| Thuesen, Erik V               | Member of the Faculty, Zoology                                                       | Evergreen State College                                               | United States of America (the)                             |
| Thuile Bistarelli, Lukas      | PhD Student                                                                          | Institute of Freshwater Science and Inland Fisheries                  | Germany                                                    |
| Thuillier, Thomas             | Ingénieur de recherche - physique des accélérateurs                                  | CNRS                                                                  | France                                                     |
| Thunnissen, Marjolein         | Life Science Director MAX IV synchrotron                                             | MAX IV                                                                | Sweden                                                     |
| Thurland, Michael             | Natural resources management specialist                                              | Conthur environment                                                   | Denmark                                                    |
| Thyagarajan, Harshavardhan    | Evolutionary genetics                                                                | Queen's university                                                    | Canada                                                     |
| Tian, Ye                      | PhD candidate                                                                        | University of Vienna                                                  | China                                                      |
| Tian, Allen                   | Biologist                                                                            | Queen's University                                                    | Canada                                                     |
| Tian, Tian                    | ocean and cryosphere                                                                 | University of Tasmania                                                | Australia                                                  |
| Tibaldo, Luigi                | Staff Astronomer                                                                     | Observatoire Midi-Pyrénées, Toulouse                                  | France                                                     |
| Tibboel, Pieter               | Lecturer                                                                             | Xi'an Jiaotong-Liverpool University                                   | China                                                      |
| Tiberi, Simone                | Postdoc in Statistics                                                                | Institute of Molecular Life Sciences                                  | Switzerland                                                |
| Tibirica, Yara                | Researcher                                                                           | Zavora Marine Lab.                                                    | Mozambique                                                 |
| Ticehurst@anu.edu.au, Jenifer | Research Fellow                                                                      | Australian National University                                        | Australia                                                  |
| Tickle, Ian                   | Structural Molecular Biology                                                         | Global Phasing Ltd.                                                   | United Kingdom of Great Britain and Northern Ireland (the) |

|                                 |                                                                     |                                                                            |                                                            |
|---------------------------------|---------------------------------------------------------------------|----------------------------------------------------------------------------|------------------------------------------------------------|
| Ticktin, Tamara                 | Professor of Botany                                                 | University of Hawaii at Manoa                                              | United States of America (the)                             |
| Tiebout, Harry                  | Professor of Ecology & Conservation                                 | West Chester University                                                    | United States of America (the)                             |
| Tielbörger, Katja               | Professor for Plant Ecology                                         | University of Tübingen                                                     | Germany                                                    |
| Tieman, Gordon                  | Forest Pathologist                                                  | Scion Forestry Research                                                    | New Zealand                                                |
| Tiemann, Tassilo                | Agricultural research consultant                                    | Freelance                                                                  | Lao People's Democratic Republic (the)                     |
| Tiemann, Johanna                | PhD Candidate                                                       | University Leipzig                                                         | Germany                                                    |
| Tierno de Figueroa, José Manuel | Associate Professor                                                 | Universidad de Granada                                                     | Spain                                                      |
| Tietjen, Kristina               | Project manager and graduate student                                | University of Victoria - Baum Lab                                          | Canada                                                     |
| Tietjen, Britta                 | Professor for Theoretical Ecology                                   | Freie Universität Berlin                                                   | Germany                                                    |
| Tietze, Dieter Thomas           | Curator Vertebrates                                                 | Natural History Museum Basel                                               | Switzerland                                                |
| Tigini, Valeria                 | Post Doc                                                            | Department of Natural Sciences and Systems' Biology, University of Turin   | Italy                                                      |
| Tignat, Romie                   | PhD student in microbiology                                         | Ecole Centrale de Lyon                                                     | France                                                     |
| Tikka, Ville                    | Project Researcher, Social and Public Policy                        | University of Jyväskylä                                                    | Finland                                                    |
| Tilder, Jesse                   | Bachelor Plant Science                                              | Wageningen University                                                      | Netherlands (the)                                          |
| Till-Bottraud, Irène            | Researcher in evolutionary biology                                  | CNRS                                                                       | France                                                     |
| Tillmann, Dr. Frank             | Senior Researcher                                                   | German Youth Institute                                                     | Germany                                                    |
| Tilquin, Anaïs                  | PhD student in evolutionary biology                                 | University of Zürich                                                       | Switzerland                                                |
| Tilstra, Arjen                  | PhD candidate                                                       | Universitat of Bremen, Marine Ecology Group                                | Germany                                                    |
| Timberlake, Jonathan            | Botanist                                                            | Biodiversity Foundation for Africa                                         | United Kingdom of Great Britain and Northern Ireland (the) |
| Timm, Robert M.                 | Professor                                                           | University of Kansas                                                       | United States of America (the)                             |
| Timm, Gary                      | Retired                                                             | U.S. Environmental Protection Agency                                       | United States of America (the)                             |
| Timmis, Anna                    | GP                                                                  | RCGP                                                                       | United Kingdom of Great Britain and Northern Ireland (the) |
| Timmis, Kenneth                 | Emeritus Professor                                                  | Technical University Braunschweig                                          | Germany                                                    |
| Timóteo, Sérgio                 | Junior Researcher                                                   | Centre for Functional Ecology                                              | Portugal                                                   |
| Timpte, Candace                 | Professor                                                           | Georgia Gwinnett College                                                   | United States of America (the)                             |
| Tinya, Flóra                    | research fellow, ecologist                                          | MTA Centre for Ecological Research                                         | Hungary                                                    |
| Tirpitz, Jan-Lukas              | PhD student, Environmental Physics                                  | Institute of Environmental Physics - University of Heidelberg              | Germany                                                    |
| Tisserand, Lucas                | PhD Student in Aquatic Microbial Ecology                            | Laboratoire d'Océanographie Microbienne - UMR7621 CNRS-Sorbonne Université | France                                                     |
| Tissier, Mathilde               | Research scholar / biology                                          | Bishop's University                                                        | Canada                                                     |
| Tissot, Tazzio                  | Postdoctoral fellow in Evolutionary biology                         | Muséum National d'Histoire Naturelle                                       | France                                                     |
| Tissot, Jean-Daniel             | Sysamin                                                             | CNRS                                                                       | France                                                     |
| Titchen, Angie                  | Former Clinical Chair, Knowledge Centre for Evidence-Based Practice | Fontys University of Applied Sciences, Eindhoven, The Netherlands          | United Kingdom of Great Britain and Northern Ireland (the) |
| Titley, Mark                    | PhD Candidate in Ecology                                            | Durham University                                                          | United Kingdom of Great Britain and Northern Ireland (the) |
| Titshall, Louis                 | Senior Soil Scientist                                               | South African Sugarcane Research Institute                                 | South Africa                                               |

|                                    |                                                                              |                                                                                                                   |                                                               |
|------------------------------------|------------------------------------------------------------------------------|-------------------------------------------------------------------------------------------------------------------|---------------------------------------------------------------|
| Tiunov, Alexei                     | Researcher in Ecology                                                        | A.N. Severtsov Institute of Ecology and Evolution,<br>Russian Academy of Sciences, Russian Academy of<br>Sciences | Russian Federation (the)                                      |
| Tobin, Deborah                     | Professor of Biological Sciences                                             | University of Alaska Anchorage - KBC                                                                              | United States of America (the)                                |
| Tobin, Amanda                      | Meteorology researcher                                                       | Universidad Autónoma de Madrid                                                                                    | Spain                                                         |
| Todaro, M. Antonio                 | Associate professor of Zoology                                               | University of Modena and Reggio Emilia                                                                            | Italy                                                         |
| Todd, Jacqui                       | Ecologist                                                                    | The New Zealand Institute for Plant and Food<br>Research                                                          | New Zealand                                                   |
| Todd, Mark                         | Meteorologist                                                                | Meteorological Service of New Zealand                                                                             | New Zealand                                                   |
| Tognetti, Arnaud                   | Post doc - Behavioural Ecology                                               | Karolinska Institutet                                                                                             | Sweden                                                        |
| Togni, Pedro                       | Professor                                                                    | Universidade de Brasília                                                                                          | Brazil                                                        |
| Toigo, Flavio                      | Emeritus Professor of Condensed Matter Physics                               | Dept. of Physics - University of Padua                                                                            | Italy                                                         |
| Toivonen, Janne M.                 | Associate professor                                                          | University of Zaragoza                                                                                            | Spain                                                         |
| Tokac, Suzan                       | PhD researcher on Cognitive Science                                          |                                                                                                                   | Australia                                                     |
| Tokarska-Guzik, Barbara            | professor, biological sciences                                               | Uniwersytet Śląski                                                                                                | Poland                                                        |
| Tokumaru, Rosana Suemi             | Professor                                                                    | Universidade Federal do Espirito Santo                                                                            | Brazil                                                        |
| Tokunaga, Alan                     | Emeritus Astronomer                                                          | University of Hawaii                                                                                              | United States of America (the)                                |
| Tolche, Abebe Debele               | Hydrology/Hydrogeology                                                       | Haramaya University                                                                                               | Ethiopia                                                      |
| Tolhurst, Bryony                   | Senior Lecturer in Behavioural Ecology and<br>Conservation                   | University of Brighton                                                                                            | United Kingdom of Great Britain<br>and Northern Ireland (the) |
| TOLLE, Florian                     | Assistant professor in geography                                             | Université de Bourgogne Franche-Comté                                                                             | France                                                        |
| Tolmos, Maria Laura                | Master student                                                               | University of Göttingen                                                                                           | Germany                                                       |
| Tomad, Walfrido                    | Researcher                                                                   | Embrapa Pantanal                                                                                                  | Brazil                                                        |
| Tomas, Walfrido                    | Researcher                                                                   | Embrapa Pantanal                                                                                                  | Brazil                                                        |
| Tomás, Gustavo                     | Scientist, Evolutionary Ecology                                              | Estación Experimental de Zonas Áridas, EEZA -<br>Spanish National Research Council, CSIC                          | Spain                                                         |
| Tomaselli, Alexandra               | Senior Researcher                                                            | Eurac Research                                                                                                    | Italy                                                         |
| Tomasevic, Jorge A.                | Research Coordinator                                                         | Rio Cruces Wetlands Center, Universidad Austral de<br>Chile, Valdivia, Chile                                      | Chile                                                         |
| Tomasson, Johannes Bjarki Urbancic | Biologist                                                                    | University of Iceland                                                                                             | Iceland                                                       |
| Tomassone, Laura                   | Researcher                                                                   | University of Turin, Dept. of Veterinary Sciences                                                                 | Italy                                                         |
| Tomich, Thomas                     | Professor and Director, Agricultural Sustainability<br>Institute / economist | University of California, Davis                                                                                   | United States of America (the)                                |
| Tomlinson, Bill                    | Professor of Informatics                                                     | University of California, Irvine                                                                                  | United States of America (the)                                |
| Tomsic, Jerneja                    | Staff Scientist                                                              | City of Hope National Medical Center                                                                              | United States of America (the)                                |
| Tonasetto, Federico                | Senior Research Scientist                                                    | AgResearch                                                                                                        | New Zealand                                                   |
| Tonkin, Jonathan                   | Ecology                                                                      | University of Canterbury                                                                                          | New Zealand                                                   |
| Tonnabel, Jeanne                   | Postdoctoral researcher                                                      | University of Lausanne                                                                                            | Switzerland                                                   |
| Tonne, Cathryn                     | Associate Research Professor, Environmental<br>Epidemiology                  | Barcelona Institute for Global Health                                                                             | Spain                                                         |
| Tonneijck, Femke                   | Programme Head Wetland Carbon, PhD                                           | Wetlands International                                                                                            | Netherlands (the)                                             |
| Tonoto, Prayoto                    | Environment                                                                  | Riau environment and forestry office                                                                              | Indonesia                                                     |

|                                  |                                                                                                                                           |                                                                                  |                                                            |
|----------------------------------|-------------------------------------------------------------------------------------------------------------------------------------------|----------------------------------------------------------------------------------|------------------------------------------------------------|
| Tooke, Amy                       | PhD student                                                                                                                               | University of Sheffield                                                          | United Kingdom of Great Britain and Northern Ireland (the) |
| Tooke, Pat                       | Infectious Diseases Epidemiologist                                                                                                        | University College London                                                        | United Kingdom of Great Britain and Northern Ireland (the) |
| Topercer, Jano                   | Senior research worker - ecologist                                                                                                        | Comenius University in Bratislava, Botanical Garden at Blatnica                  | Slovakia                                                   |
| Topi, Corrado                    | Senior Scientist                                                                                                                          | Stockholm Environment Institute Centre at the University of York                 | United Kingdom of Great Britain and Northern Ireland (the) |
| Torcini, Alessandro              | Professor of Physics                                                                                                                      | Universite' de Cergy-Pontoise                                                    | France                                                     |
| Torices, Rubén                   | Lecturer in Ecology                                                                                                                       | King Juan Carlos University                                                      | Spain                                                      |
| Tormo, Jaume                     | Profesor Ayudante Doctor. Ecology.                                                                                                        | Unversidad de Zaragoza                                                           | Spain                                                      |
| Tornero, Irene                   |                                                                                                                                           | Institute of Aquatic Ecology (IEA), Universitat de Girona                        | Spain                                                      |
| TORNERO IRANZO, FRANCISCO        | INGENIERO TECNICO FORESTAL                                                                                                                | CONSEJERIA DE DESARROLLO SOSTENIBLE                                              | Spain                                                      |
| Törnroos, Anna                   | Asst. Prof.                                                                                                                               | Environmental and Marine Biology, Åbo Akademi University                         | Finland                                                    |
| Torquebiau, Emmanuel             | Agroforestry Researcher                                                                                                                   | CIRAD                                                                            | France                                                     |
| Torra, Joel                      | researcher                                                                                                                                | University of Lleida                                                             | Spain                                                      |
| Torralba-Burrial, Antonio        | Assistant Professor on Didactics of Experimental Sciences / Coordinator of the Area of Environmental Education & Communication at Indurot | Universidad de Oviedo                                                            | Spain                                                      |
| Torrao, Filipa                   | Masters Biochemistry                                                                                                                      | EMBL                                                                             | Portugal                                                   |
| Torrecilla, Elena                | Scientific Officer                                                                                                                        | Institut de Ciències del Mar (ICM-CSIC)                                          | Spain                                                      |
| Torrent, Laura                   | PhD candidate                                                                                                                             | University of Girona                                                             | Spain                                                      |
| Torrente-Vilara, Gislene         | Assistant Professor                                                                                                                       | Instituto do Mar/Universidade Federal de São Paulo                               | Brazil                                                     |
| Torres, Tomas                    | Full Professor of Organic Chemistry                                                                                                       | Universidad Autonoma de Madrid                                                   | Spain                                                      |
| Torres, Rafael                   | Oceanographer - Proffesor                                                                                                                 | Universidad del Norte                                                            | Colombia                                                   |
| Torres, Rita                     | Researcher - Biology                                                                                                                      | University of Aveiro                                                             | Portugal                                                   |
| Torres, Arturo                   | Retired, former hydrologist with USGS                                                                                                     | USGS                                                                             | United States of America (the)                             |
| TORRES FIGUEROLA, CATALINA MARIA | ASSOCIATE PROFESSOR                                                                                                                       | LINCC-UNIVERSITY OF THE BALEARIC ISLANDS                                         | Spain                                                      |
| Torres Quezada, Isabel           | PhD student                                                                                                                               | Instituto Hispanoluso de Investigaciones Agrarias (CIALE)                        | Spain                                                      |
| Torres-Porras, Jeronimo          | Professor                                                                                                                                 | University of Cordoba                                                            | Spain                                                      |
| Torres-Ruiz, José M.             | Research Scientist                                                                                                                        | INRA                                                                             | France                                                     |
| Torresani, Loris                 | Ph.D Candidate in Hydrology/natural hazard mitigation                                                                                     | Department of Land, Environment, Agriculture and Forestry - University of Padova | Italy                                                      |
| TORRETTI, CHARLOTTE              | Geopolitics                                                                                                                               | University of Bordeaux Montaigne                                                 | France                                                     |
| Torricelli, Gian Paolo           | Professor of Urban Geography and Head of OST (Observatory of spatial development)                                                         | Università della Svizzera italiana                                               | Switzerland                                                |
| Torsani, Fabrizio                | Research fellow                                                                                                                           | Polytechnic University of Marche                                                 | Italy                                                      |
| Tosi, Maria Chiara               | professor urbanism                                                                                                                        | Università Iuav di Venezia                                                       | Italy                                                      |
| Tosney, Kathryn                  | Professor Emeritas                                                                                                                        | University of Miami                                                              | United States of America (the)                             |

|                      |                                                                  |                                                                    |                                |
|----------------------|------------------------------------------------------------------|--------------------------------------------------------------------|--------------------------------|
| Tosto, Ambra         | PhD Candidate                                                    | Wageningen University & research                                   | Netherlands (the)              |
| Tóth, Zoltán         |                                                                  | Hungarian Academy of Sciences                                      | Hungary                        |
| Tötzke, Christian    | Postdoctoral research fellow                                     | University of Potsdam                                              | Germany                        |
| TOUBANOS, Dimitri    | MCFA of Architecture and Urban Planning                          | ENSA Paris Val-de-Seine                                            | France                         |
| TOUCHE, Jeanne       | PhD Student in biogeochemistry                                   | INRAe                                                              | France                         |
| Tougeron, Kevin      | Chargé de Recherches (postdoc)                                   | Université Catholique de Louvain                                   | Belgium                        |
| Toukhsati, Samia     | Senior Lecturer, Psychology                                      | Federation University Australia                                    | Australia                      |
| Toulotte, Justine    | PhD in Plant Ecophysiology                                       | Utrecht University                                                 | Netherlands (the)              |
| Toum, Ezequiel       | Hydrology                                                        | IANIGLA-CONICET                                                    | Argentina                      |
| Touma, Chadi         | Professor for Behavioural Biology                                | University of Osnabrueck                                           | Germany                        |
| Tourancheau, Bernard | Professor in Computer Science                                    | Grenoble-Alps University                                           | France                         |
| TOURNANT, Pierline   | Ecology                                                          |                                                                    | France                         |
| Tournayre, Orianne   | PhD student                                                      |                                                                    | France                         |
| TOURNEBIZE, Julien   | Researcher in Soil Hydrology and Ecological Engineering          | Irstea / UR HYCAR                                                  | France                         |
| TOURNEBIZE, Regis    | Senior Researcher                                                | INSERM                                                             | France                         |
| Toutounji, Hazem     | Postdoctoral Researcher in Theoretical Neuroscience              | Institute of Neuroinformatics, University of Zurich and ETH Zurich | Switzerland                    |
| TOUZARD, jean-Marc   | Director of Research                                             | INRA                                                               | France                         |
| Touzé, Cyril         | Professor, Mechanics and dynamics                                | ENSTA Paris                                                        | France                         |
| Touzot, Laura        | PhD Student                                                      | LBBE CNRS                                                          | France                         |
| Touzot, Gilbert      | Professor university                                             | Université numérique nationale française UNIT                      | France                         |
| Townsend, Sheena     | Professional Practice Fellow/Conservation Genetics and Evolution | University of Otago                                                | New Zealand                    |
| Traba, Juan          | Assistant Professor                                              | Universidad Autonoma de Madrid                                     | Spain                          |
| Trabant, Peter       | PhD/Oceanographer                                                | Retired                                                            | United States of America (the) |
| Traber, Maret        | Professor/Nutrition                                              | Oregon State University                                            | United States of America (the) |
| Tracy, Morgan        | Pollination Ecologist                                            | University of Canterbury                                           | New Zealand                    |
| Trajce, Aleksander   | PhD Anthropology                                                 | PPNEA                                                              | Albania                        |
| Tramblay, Yves       | Research scientist                                               | IRD / HydroSciences Montpellier                                    | France                         |
| Tranvik, Lars        | Professor, Limnology                                             | Department of Ecology and Genetics, Uppsala University             | Sweden                         |
| Trapp, Michael       | Chemist                                                          | private                                                            | Germany                        |
| Travaglini, Davide   | Professor of Forest geomatics                                    | University of Florence                                             | Italy                          |
| Travers, Toby        | PhD candidate                                                    | Institute of Marine and Antarctic Studies, University of Tasmania  | Australia                      |
| Traveset, Anna       | RESEARCH PROFESSOR BIOLOGY                                       | SPANISH RESEARCH COUNCIL, CSIC                                     | Spain                          |
| Traving, Sachia      | Postdoctoral researcher in Marine Microbiology                   | University of British Columbia                                     | Canada                         |
| Traylor, Daniel      | Post Doctoral Fellow Exercise Metabolism Research Group          | McMaster University                                                | Canada                         |
| Traylor, Wolfgang    | PhD student                                                      | Senckenberg Biodiversity and Climate Research Centre Frankfurt     | Germany                        |

|                            |                                                                      |                                                         |                                                            |
|----------------------------|----------------------------------------------------------------------|---------------------------------------------------------|------------------------------------------------------------|
| Treagus, Samantha          | PhD scientist, Biological water pollution (viruses)                  | University of Exeter                                    | United Kingdom of Great Britain and Northern Ireland (the) |
| Treharne, Kate             | Horticultural therapy                                                | Dundee City Council                                     | United Kingdom of Great Britain and Northern Ireland (the) |
| Treich, Nicolas            | Research associate                                                   | Toulouse School of Economics and INRA                   | France                                                     |
| Treichler, Désirée         | PostDoc, Cryosphere Sciences/Remote Sensing                          | Department of Geosciences, University of Oslo           | Norway                                                     |
| Tremblay, Emy              | Master student in paleoecology                                       | Université du Québec à Chicoutimi                       | Canada                                                     |
| Tremoleda, Imma            | psychology                                                           | Education                                               | Spain                                                      |
| Tress, Michael             | Staff scientist                                                      | Spanish National Cancer Research Centre (CNIO)          | Macao                                                      |
| Treurnicht, Martina Fynbos | Postdoctoral Researcher                                              | Stellenbosch University                                 | South Africa                                               |
| Trevathan-Tackett, Stacey  | Postdoctoral Fellow                                                  | Deakin University                                       | Australia                                                  |
| Trevino, Marcela           | Biology Professor                                                    | Florida Southwestern State College                      | United States of America (the)                             |
| Triana-Moreno, Luz Amparo  | Associate Professor / Botanist                                       | Universidad de Caldas                                   | Colombia                                                   |
| Tribollet, Aline           | Marine Ecologist - Researcher                                        | Institut de Recherche pour le Développement             | France                                                     |
| tribot, sandra             | Botanic                                                              | Conservatoire et Jardin botanique de la ville de Genève | Switzerland                                                |
| Tricault, Yann             | Lecturer in Applied Ecology and Plant Protection                     | Agrocampus Ouest                                        | France                                                     |
| Trick, Charles             | Professor Emeritus                                                   | Western University                                      | Canada                                                     |
| Trigo, Dolores             | Associate Professor                                                  | Univeristy Complutense of Madrid                        | Spain                                                      |
| Triguero-Ocaña, Roxana     | PhD student - Epidemiology                                           | Instituto de Investigación en Recursos Cinegéticos      | Spain                                                      |
| Trillo, Paula Alejandra    | Assistant Professor of Biology                                       | Gettysburg College                                      | United States of America (the)                             |
| Trimmel, Gregor            | University Professor / Materials Chemistry                           | Graz University of Technology                           | Austria                                                    |
| Tripathi, Amarnath         | Associate Professor of Economics                                     | Sharda University                                       | India                                                      |
| TRIPEPI, Sandro            | Full professor Zoology                                               | Calabria University                                     | Italy                                                      |
| Tripoli, Vicki             | Environmental scientist                                              | Retired                                                 | United States of America (the)                             |
| Triviño, María             | Postdoctoral Researcher                                              | University of Jyväskylä                                 | Finland                                                    |
| Troia, Angelo              | Researcher in Botany                                                 | University of Palermo, Dept. STEBICEF                   | Italy                                                      |
| Troia, Marion              | retired lecturer                                                     | Hanze University of Applied Sciences                    | Netherlands (the)                                          |
| Trollip, Hilton            | Senior Researcher - Associate                                        | Energy Research Centre, University of Cape Town         | South Africa                                               |
| Troscianko, Jolyon         | Research Fellow                                                      | University of Exeter                                    | United Kingdom of Great Britain and Northern Ireland (the) |
| Trott, Dr. Gary R          | Physicist                                                            | Retired                                                 | United States of America (the)                             |
| Trouillier, Mario          | Forest Ecologist                                                     | University of Greifswald                                | Germany                                                    |
| Trouillon, Julian          | Microbiology                                                         | Grenoble Alpes University                               | France                                                     |
| Trower, Peter              | Retired professor of clinical psychology but still active researcher | University of Birmingham, UK                            | United Kingdom of Great Britain and Northern Ireland (the) |
| Trower, Hayley             | PhD psychology                                                       | University of Warwick                                   | United Kingdom of Great Britain and Northern Ireland (the) |
| Trueba, Santiago           | Postdoctoral Reserarcher, Ecology                                    | Yale University                                         | United States of America (the)                             |
| Trujillo, Rony             | Biologist                                                            | Universidad de San Carlos de Guatemala                  | Guatemala                                                  |
| Tsai, Yi-Chien Vita        | Professional Teaching Fellow, Faculty of Science                     | The University of Auckland                              | New Zealand                                                |
| Tsai, Fujung               | associate professor                                                  | National Taiwan Ocean University                        | Taiwan                                                     |

|                                        |                                                                                                                    |                                                            |                                                            |
|----------------------------------------|--------------------------------------------------------------------------------------------------------------------|------------------------------------------------------------|------------------------------------------------------------|
| Tsakalakis, Ioannis                    | Post Doc                                                                                                           | Marine Biological Laboratory, Woods Hole                   | United States of America (the)                             |
| Tsalaporta, Eleni                      | Lecturer, Chemical Engineering                                                                                     | University College Cork                                    | Ireland                                                    |
| Tsalyuk, Miriam                        | Postdoctoral researcher, wildlife ecology                                                                          | Hebrew university of Jerusalem                             | Israel                                                     |
| Tscharntke, Teja                       | Professor for Agroecology                                                                                          | University of Göttingen                                    | Germany                                                    |
| Tschigg, Katharina                     | Junior Researcher                                                                                                  | EURAC Research                                             | Italy                                                      |
| Tschopp, Maurice                       | Post Doc Researcher - Geography and sustainable development                                                        | Centre for development and environment, University of Bern | Switzerland                                                |
| Tseng, Ashley                          | Master of Public Health in Epidemiology Candidate                                                                  | Columbia University                                        | United States of America (the)                             |
| Tsigaris, Panagiotis                   | Professor                                                                                                          | Thompson Rivers University                                 | Canada                                                     |
| Tsogetsai Khan Dursahinhan, Altangerel | Assistant Curator at Manter Laboratory of Parasitology, University of Nebraska-Lincoln State Museum, PhD candidate | University of Nebraska-Lincoln                             | United States of America (the)                             |
| Tsougras, Costas                       | Associate Professor                                                                                                | Aristotle University of Thessaloniki                       | Greece                                                     |
| Tuano, Philip                          | Assistant Professor, Economics Department                                                                          | Ateneo de Manila University                                | Philippines (the)                                          |
| Tuchman, Nancy                         | Dean, Environmental Science and Ecology                                                                            | Loyola University Chicago                                  | United States of America (the)                             |
| Tuchman, nancy                         | Professor and Dean Environmental Science                                                                           | Loyola University Chicago                                  | United States of America (the)                             |
| Tuffin, Ashley                         | Research Assistant in Molecular Biology                                                                            | John Innes Centre                                          | United Kingdom of Great Britain and Northern Ireland (the) |
| Tuleubekov, Assyl                      | Associate Professor                                                                                                | International Information Technologies University          | Kazakhstan                                                 |
| TUMENTA, Pricelia                      | Senior Lecturer, Wildlife Ecology and Conservation                                                                 | University of Dschang                                      | Cameroon                                                   |
| Tunon, Håkan                           | Senior Research Officer                                                                                            | Swedish Biodiversity Centre                                | Sweden                                                     |
| Tuomisto, Hanna                        | Professor                                                                                                          | University of Turku                                        | Finland                                                    |
| Tura, Pedro                            | PhD Oceanography                                                                                                   | Oceanographic Institution - University of São Pulo         | Brazil                                                     |
| Turiégano, Enrique                     | Senior Lecturer, Biology                                                                                           | Universidad Autónoma de Madrid                             | Spain                                                      |
| Türkmen, Ant                           | Marine Biologist                                                                                                   | Ecological Research Society                                | Turkey                                                     |
| Turley, Nash                           | Postdoctoral fellow in ecology                                                                                     | University of Central Florida                              | United States of America (the)                             |
| Turnbull, Matthew                      | Professor and Head of the School of Biological Sciences                                                            | University of Canterbury                                   | New Zealand                                                |
| Turnbull, Lindsay                      | Plant Ecologist                                                                                                    | University of Oxford                                       | United Kingdom of Great Britain and Northern Ireland (the) |
| Turner, Andrew                         | Restoration Ecologist                                                                                              | CapeNature                                                 | South Africa                                               |
| Turner, Daniel                         | PhD student Ecology                                                                                                | University of Southampton                                  | United Kingdom of Great Britain and Northern Ireland (the) |
| Turner, Jake                           | Research associate, Astrophysics                                                                                   | Cornell University                                         | United States of America (the)                             |
| Turner, James                          | Postdoctoral Research Fellow, wildlife ecophysiology                                                               | Charles Sturt University                                   | Australia                                                  |
| Turner, Anna                           | PhD candidate                                                                                                      | Charles Sturt University                                   | Australia                                                  |
| Turner, Lucy                           | Lecturer in Marine Biology                                                                                         | University of Plymouth                                     | United Kingdom of Great Britain and Northern Ireland (the) |
| Turney, Chris                          | Professor of Climate Change and Earth Science                                                                      | University of New South Wales                              | Australia                                                  |
| Turon, Xavier                          | Research Professor / Marine Ecology                                                                                | Spanish Research Council (CSIC)                            | Spain                                                      |
| Turrent, Cuauhtemoc                    | Researcher, Physical Oceanography                                                                                  | CICESE                                                     | Mexico                                                     |

|                          |                                                                    |                                                                                  |                                                            |
|--------------------------|--------------------------------------------------------------------|----------------------------------------------------------------------------------|------------------------------------------------------------|
| Turton, Anthony          | Professor                                                          | Centre for Environmental Management University of Free State                     | South Africa                                               |
| Tuthill, Cynthia         | Biochemist/Chief Scientific Officer for pharmaceutical development | Retired from SciClone Pharmaceuticals, Inc.                                      | United States of America (the)                             |
| Tuzun, Nedim             | Postdoc, Ecology & Evolution                                       |                                                                                  | Liechtenstein                                              |
| Twardochleb, Laura       | PhD Candidate, Freshwater Ecology                                  | Michigan State University                                                        | United States of America (the)                             |
| Twiggs, Matthew          | Senior Conservation Officer                                        | Barn Owl Trust                                                                   | United Kingdom of Great Britain and Northern Ireland (the) |
| Twining, Joshua Peter    | PhD in Ecology                                                     | Queen's University, Belfast                                                      | United Kingdom of Great Britain and Northern Ireland (the) |
| Twiss, Sean              | Associate Professor in Behavioural Ecology                         | Durham University                                                                | United Kingdom of Great Britain and Northern Ireland (the) |
| Tylianakis, Jason        | Professor of Ecology                                               | University of Canterbury                                                         | New Zealand                                                |
| Tyne, Julian             | Marine Ecologist                                                   | Murdoch University                                                               | Australia                                                  |
| Tyszk, Stephane          |                                                                    | NUCLIO - Núcleo Interactivo de Astronomia                                        | Portugal                                                   |
| Tyteca, Daniel           | Professor Emeritus, Biodiversity Research Centre                   | Université catholique de Louvain (UCLouvain)                                     | Belgium                                                    |
| Tzanatos, Evangelos      | Assistant Professor in Marine Ecology-Fisheries Management         | University of Patras                                                             | Greece                                                     |
| Tzanetou, Katerina       | Applied physics                                                    | National Technical University of Athens                                          | Greece                                                     |
| U' Ren, Alfred           | Full professor                                                     | UNAM                                                                             | Mexico                                                     |
| Ubaid, Flávio Kulaif     | Adjunct Professor, Ecology                                         | Universidade Estadual do Maranhão (UEMA)                                         | Brazil                                                     |
| Uber, Magdalena          | Doctoral Candidate                                                 | Institute for Geosciences and Environmental research / Université Grenoble Alpes | France                                                     |
| Udaloy, Anne             | Hydrogeologist                                                     | Udaloy Environmental Consulting                                                  | United States of America (the)                             |
| Udayar Pillai, Surendran | Senior Scientist                                                   | Centre for Water Resources Development and Management                            | India                                                      |
| Udino, Eve               | PhD candidate                                                      | Deakin University                                                                | Australia                                                  |
| Udy, James               | Adjunct Professor / Marine Scientist /Director Science Under Sail  | QUT and Science Under Sail                                                       | Australia                                                  |
| Uehara, Thiago H. K.     | Research Fellow                                                    | Imperial College London                                                          | United Kingdom of Great Britain and Northern Ireland (the) |
| Uhl, Michael             | Bioinformatics                                                     | University of Freiburg                                                           | Germany                                                    |
| Uhl, Britta              | M. Sc. Biol, PhD-Student                                           | University of Vienna                                                             | Austria                                                    |
| Uhl, Philipp             | PhD student                                                        | University of Koblenz-Landau                                                     | Germany                                                    |
| Uhrin, Marcel            | associate professor / ecology, zoology                             | Faculty of Science, P. J. Šafárik University in Košice                           | Slovakia                                                   |
| Uilhoorn, Anne           | PhD in Vegetation Ecology                                          | Leiden University                                                                | Netherlands (the)                                          |
| Ukens, Sophia            | Medicine                                                           | Westfälische Wilhelmsuniversität Münster                                         | Germany                                                    |
| Ulimboka, Rehema         | Assistant Lecturer                                                 | University of Dodoma                                                             | Tanzania, United Republic of                               |
| Ullah, Manzoor           | Professor                                                          | HED                                                                              | Pakistan                                                   |
| Ullrich, Susann          | Biologist in Environmental Psychology                              | Institute of Advanced Sustainability Studies (IASS) Potsdam                      | Germany                                                    |
| Ullrich-Lueter, Esther   | Postdoc/Evolutionary Biology                                       | Museum fuer Naturkunde Berlin (Natural History Museum Berlin)                    | Germany                                                    |

|                               |                                                            |                                                                                           |                                                            |
|-------------------------------|------------------------------------------------------------|-------------------------------------------------------------------------------------------|------------------------------------------------------------|
| Ulman, Aylin                  | Marine biologist                                           | Mersea Marine Consulting                                                                  | Turkey                                                     |
| Ulrich, Yuko                  | Research Fellow                                            | University of Lausanne                                                                    | Switzerland                                                |
| Ulrici, Alessandro            | Associate Professor of Analytical Chemistry - Chemometrics | University of Modena and Reggio Emilia                                                    | Italy                                                      |
| Uludag, Ahmet                 | Professor on weed science                                  | Plant Protection Dep. Faculty of Agriculture, Canakkale Onsekiz Mart University           | Turkey                                                     |
| Umar, Muhammad                | Research Scientist                                         | Norwegian Institute for Water Research                                                    | Norway                                                     |
| Umerez, Jon                   | University researcher & lecturer / Philosophy of Biology   | University of the Basque Country (UPV/EHU)                                                | Spain                                                      |
| Unsworth, Richard             | Lecturer                                                   | Swansea University                                                                        | United Kingdom of Great Britain and Northern Ireland (the) |
| Untersteiner, Dr. Hubert      | Ecotoxicologist / Biologist                                |                                                                                           | Austria                                                    |
| Uomini, Natalie               | Senior Scientist                                           | Max Planck Institute for the Science of Human History                                     | Germany                                                    |
| UPTON, Murray                 | Entomologist (retired)                                     | CSIRO                                                                                     | Australia                                                  |
| Urban, Alan                   | Entomology                                                 | N/A                                                                                       | South Africa                                               |
| Urban, Jan                    | Researcher, Environmental psychology                       | Charles University Environment Center                                                     | Czech Republic (the)                                       |
| Urbat, Stefan                 | physicist                                                  |                                                                                           | Germany                                                    |
| Urbez-Torres, Jose Ramon      | Research Scientist / Plant Pathology                       | Agriculture and Agri-Food Canada                                                          | Canada                                                     |
| Urdampilleta, Constanza María | Biology                                                    | UBA                                                                                       | Argentina                                                  |
| Urgeles, Roger                | Principal scientist                                        | Institute of Marine Sciences                                                              | Spain                                                      |
| Uria, Jaime                   | Post Doc - Plant Ecology                                   | Swedish Agricultural University                                                           | Sweden                                                     |
| URIEN, Charlotte              | Biology                                                    |                                                                                           | France                                                     |
| Uroy, Léa                     | PhD student in Ecology                                     | University of Rennes                                                                      | France                                                     |
| Urrego, Dunia H.              | Senior Lecturer Physical Geography                         | University of Exeter                                                                      | United Kingdom of Great Britain and Northern Ireland (the) |
| Urrego, Ligia E               | Professor                                                  | Universidad Nacional de Colombia - Sede Medellín                                          | Colombia                                                   |
| URRUTY, Benoît                | PhD in glaciology                                          | Université Grenoble Alpes / Institut des géosciences et de l'environnement                | France                                                     |
| Utsumi, Daniel                | PhD student                                                | Universidade federal de são Paulo - unifesp                                               | Brazil                                                     |
| Utz, Nadine                   | Managing Director                                          | German BioImaging - Society for Microscopy and Image Analysis, c/o University of Konstanz | Germany                                                    |
| Üveges, Bálint                | research fellow - evolutionary ecology and herpetology     | Hungarian Academy of Sciences                                                             | Hungary                                                    |
| Uzu, Gaëlle                   | Researcher in Atmospheric Geochemistry                     | IGE- Institute of Environmental Geosciences                                               | France                                                     |
| Vaccari, Davide               | Junior Researcher                                          | Fondazione Eni Enrico Mattei                                                              | Italy                                                      |
| Vacchiano, Giorgio            | Assistant professor in forest management and planning      | University of Milan, DISAA                                                                | Italy                                                      |
| Vachaud, Georges              | Emeritus Senior Scientist                                  | CNRS- French National Reserach Council                                                    | France                                                     |
| Vache, Marian                 | PostDoc, Biophysics                                        | Institute of Physical Chemistry, University of Göttingen                                  | Germany                                                    |
| Vad, Csaba                    | researcher/ecologist                                       | MTA Centre for Ecological Research                                                        | Hungary                                                    |
| Vadén, Tere                   | Researcher                                                 | BIOS Research Unit                                                                        | Finland                                                    |

|                            |                                                          |                                                                                                                    |                                                            |
|----------------------------|----------------------------------------------------------|--------------------------------------------------------------------------------------------------------------------|------------------------------------------------------------|
| Vadineanu, Angheluta       | University Proffesor                                     | University of Bucharest                                                                                            | Romania                                                    |
| Vafae Eslahi, Aida         | PhD student                                              | University of Tarbiat modares                                                                                      | Iran (Islamic Republic of)                                 |
| Vágner, Lukáš              | scientist                                                | Czech Globe                                                                                                        | Czech Republic (the)                                       |
| Vail, David                | Adams Catlin Professor of Economics emeritus             | Bowdoin College                                                                                                    | United States of America (the)                             |
| Vainio, Henna              | doctoral student                                         | University of Jyväskylä                                                                                            | Finland                                                    |
| Vaissière, Anne-Charlotte  | Researcher - Economics, interdisciplinarity with ecology | CNRS - Laboratory Ecology, Systematics, Evolution, University Paris-Saclay                                         | France                                                     |
| Vaizel Ohayon, Dalit       | Microbiologist                                           | Mekorot                                                                                                            | Israel                                                     |
| Vajdic, Claire             | Unit Head, Cancer Epidemiology                           | University of New South Wales                                                                                      | Australia                                                  |
| Val, Adalberto (Dal)       | Researcher                                               | INPA - Brazilian National Institute for Research of the Amazon                                                     | Brazil                                                     |
| Valadares Barroso, Gustavo | Postdoctoral researcher                                  | UCLA                                                                                                               | United States of America (the)                             |
| Valade, Aude               | Environmental science                                    | Creaf                                                                                                              | Spain                                                      |
| Valand, Karishma           | Cancer Biology                                           | Francis Crick                                                                                                      | United Kingdom of Great Britain and Northern Ireland (the) |
| Valavanis, Vasilis         | Research Scientist                                       | Hellenic Center for Marine Research                                                                                | Greece                                                     |
| Valckenborgh, Frank        | Lecturer in Mathematics                                  | Macquarie University                                                                                               | Australia                                                  |
| Valdecantos, Soledad       | Professor-Researcher                                     | IBIGEO                                                                                                             | Argentina                                                  |
| Valdez, Ursula             | Teaching Faculty Env, Science                            | University of Washington Bothell                                                                                   | United States of America (the)                             |
| Valdivia, Sonia            | Programme Manager                                        | WRF                                                                                                                | Switzerland                                                |
| Valdivia, Nelson           | Associate Profesor                                       | Universidad Austral de Chile                                                                                       | Chile                                                      |
| Valdivia Acosta, Jorge     | Electricity Engineering / Renewable Energy               |                                                                                                                    | Chile                                                      |
| Valdivielso, Joaquin       | Associate Professor in Moral Philosophy                  | University of the Balearic Islands                                                                                 | Spain                                                      |
| Vale, Cândida G            | Researcher                                               | CIIMAR - Interdisciplinary Centre of Marine and Environmental Research of the University of Porto                  | Portugal                                                   |
| Vale, Maria                | Marine Biology                                           |                                                                                                                    | Portugal                                                   |
| Vale, Pedro                | Lecturer, Evolutionary Ecology                           | University of Edinburgh                                                                                            | United Kingdom of Great Britain and Northern Ireland (the) |
| Vale Asari, Natalia        | Astrophysics                                             |                                                                                                                    | Brazil                                                     |
| VALEIX, Marion             | Researcher in Ecology                                    | CNRS                                                                                                               | France                                                     |
| Valente, João              | University Lecturer & Researcher                         | Wageningen University & Research                                                                                   | Netherlands (the)                                          |
| Valente, Antonio           | Researcher                                               | IMDEA Energy                                                                                                       | Spain                                                      |
| Valente-Neto, Francisco    |                                                          | Universidade Federal de Mato Grosso do Sul                                                                         | Brazil                                                     |
| Valentim, Gabriela         | MSc Student in Ecology and Conservation                  | Universidade Federal do Paraná                                                                                     | Brazil                                                     |
| Valentine, Leonie          | Research Fellow                                          | University of Western Australia                                                                                    | Australia                                                  |
| Valenzuela Galvan, David   | Profesor e Investigador                                  | Centro de Investigación en Biodiversidad y Conservación (CIByC) Universidad Autónoma del Estado de Morelos (UAEM). | Mexico                                                     |
| Valenzuela-Lamas, Silvia   | Researcher - Archaeology                                 | Consejo Superior de Investigaciones Científicas                                                                    | Spain                                                      |
| Valera, Francisco          | Permanent Researcher/ Evolutionary Ecologist             | Consejo Superior de Investigaciones Científicas                                                                    | Spain                                                      |
| Valérie, Vergé             | Ingineer cell biology                                    | Sorbonne University                                                                                                | France                                                     |

|                             |                                                           |                                                                 |                                                            |
|-----------------------------|-----------------------------------------------------------|-----------------------------------------------------------------|------------------------------------------------------------|
| Valérie, VERNEAUX           | Lecturer in Freshwater Ecology                            | University of Franche-Comté Labor Chrono-Environment (UMR 6249) | France                                                     |
| Valerio, Francesco          | PhD fellowship                                            | CIBIO - INBIO                                                   | Portugal                                                   |
| Valerio, Alejandro A.       | Entomologist                                              | CIBRC                                                           | Costa Rica                                                 |
| Valido, Alfredo             | Researcher                                                | Instituto de Productos Naturales y Agrobiología (IPNA-CSIC)     | Spain                                                      |
| Valiente-Banuet, Alfonso    | Tenured Research Ecologist                                | Institute of Ecology, Universidad Nacional Autónoma de Mexico   | Mexico                                                     |
| Valkó, Orsolya              | research group leader / ecologist                         | MTA-DE Lendület Seed Ecology Research GRoup                     | Hungary                                                    |
| Valkonen, Tuomo             | Academy of Finland Research Fellow, Mathematics           | University of Helsinki                                          | Finland                                                    |
| Valladares, Fernando        | Research Professor                                        | CSIC                                                            | Spain                                                      |
| Valles, Henri               | Lecturer in Ecology                                       | The University of the West Indies at Cave Hill                  | Barbados                                                   |
| Valletta, John Joseph       | Research Fellow                                           | University of Exeter                                            | United Kingdom of Great Britain and Northern Ireland (the) |
| Vallino, Joseph             | Senior Scientist, Biogeochemistry                         | Marine Biological Laboratory                                    | United States of America (the)                             |
| Vallyon, Lolita             |                                                           | University of Waikato                                           | New Zealand                                                |
| Valpuesta, José M.          | Professor in Structural Biology                           | Consejo Superior de Investigaciones Científicas                 | Spain                                                      |
| Valsecchi, João             | Director                                                  | Mamirauá Sustainable Development Institute (IDSM)               | Brazil                                                     |
| Valsecchi, Sara             | Senior Research/Biologist                                 | Water Research Institute- National Research Council of Italy    | Italy                                                      |
| Valvin, Pierre              | Research Engineer, Physics                                | CNRS / L2C Montpellier                                          | France                                                     |
| van As, Dirk                | Senior researcher                                         | GEUS                                                            | Denmark                                                    |
| Van Belle, Sarie            | Postdoctoral Research Associate/Animal Behavioral Ecology | University of Texas at Austin                                   | United States of America (the)                             |
| van Belzen, Jim             | Ecology                                                   | Netherlands Institute for Sea Research                          | Netherlands (the)                                          |
| van Bemmelen, Rob           | PhD candidate                                             | Wageningen Marine Research                                      | Netherlands (the)                                          |
| van Bergeijk, Stef          | Postdoctoral Researcher Estuarine Ecology                 | IFAPA Centro El Toruño                                          | Spain                                                      |
| van Bijsterveldt, Celine    | PhD student                                               | Royal Netherlands Institute for Sea Research (NIOZ)             | Netherlands (the)                                          |
| Van Boxel, John H.          | Meteorology and climatology                               | University of Amsterdam                                         | Netherlands (the)                                          |
| van Brakel, Martin          | Independent consultant, water resources & fisheries       |                                                                 | Netherlands (the)                                          |
| Van Copenolle, Rebecca      | Coastal Modeller Analyst                                  | University of Antwerp                                           | Belgium                                                    |
| Van Daele, Paul             | Biologist/Director                                        | Bird Protection Flanders                                        | Belgium                                                    |
| Van Daele, Frederik         | Biology/Phd candidate researcher                          | KU Leuven                                                       | Belgium                                                    |
| van Dam, Annemieke          | PhD candidate Chemistry                                   | Wageningen University                                           | Netherlands (the)                                          |
| Van de Crommenacker, Janske | Postdoc                                                   | University of Groningen                                         | Netherlands (the)                                          |
| van de Giesen, Nick         | Professor Water Resources Engineering                     | Delft University of Technology, The Netherlands                 | Netherlands (the)                                          |
| Van de Perre, Frederik      | PhD student                                               | University of Antwerp                                           | Belgium                                                    |
| Van de Velde, Jorn          | PhD Student in Hydrology                                  | Ghent University                                                | Belgium                                                    |
| van de Ven, Dirk-Jan        | Postdoc Researcher, Economics                             | Basque Center for Climate Change                                | Spain                                                      |
| Van de Vijver, Ruben        | Postdoctoral researcher chemical engineering              | Ghent University                                                | Belgium                                                    |
| Van de Voorde, Jonas        | Science communication                                     | Royal Museum for Central Africa                                 | Belgium                                                    |
| van de Waal, Erica          | Primateology                                              | University of Lausanne                                          | Switzerland                                                |

|                            |                                                               |                                                              |                                                            |
|----------------------------|---------------------------------------------------------------|--------------------------------------------------------------|------------------------------------------------------------|
| van den Berg, Eduardo      | Full Professor                                                | Universidade Federal de Lavras                               | Brazil                                                     |
| van den Berg, Cassio       | Full Professor - Plant Systematics                            | Universidade Estadual de Feira de Santana                    | Brazil                                                     |
| Van Den Berge, Sanne       | PhD student                                                   | ForNaLab, Department of Environment, Ghent University        | Belgium                                                    |
| van den Boogaart, Paul     | (micro)biologist                                              |                                                              | Netherlands (the)                                          |
| Van den Bosch, Merijn      | Ecologist                                                     | Ghent University                                             | Belgium                                                    |
| van den Brink, Liesbeth    | PhD candidate                                                 | Plantecology, University Tuebingen                           | Germany                                                    |
| Van den Brink, Valentijn   | Biology                                                       |                                                              | Netherlands (the)                                          |
| Van den Broeck, Maarten    |                                                               | KU Leuven                                                    | Belgium                                                    |
| Van den Broeck, Andreas    | lichenology                                                   | Botanic Garden Meise                                         | Belgium                                                    |
| van den Hout, Piet J.      | Biologist                                                     |                                                              | Netherlands (the)                                          |
| Van den Wyngaert, Silke    | Researcher in aquatic biology                                 | IGB Berlin                                                   | Germany                                                    |
| van der Aart, Lizah        | Postdoctoral researcher, Molecular Biology                    | Newcastle university                                         | United Kingdom of Great Britain and Northern Ireland (the) |
| van der Geer, Alexandra    | Researcher                                                    | Naturalis Biodiversity Center                                | Netherlands (the)                                          |
| van der Heijden, Geertje   | Assistant Professor in Tropical Ecology                       | University of Nottingham                                     | United Kingdom of Great Britain and Northern Ireland (the) |
| van der Kamp, Marije       | Biology-Neuroscience                                          |                                                              | Netherlands (the)                                          |
| van der Kooi, Casper J.    | PostDoc                                                       | University of Groningen                                      | Netherlands (the)                                          |
| van der Lans, Hans         | Biology Ecology                                               | Director of Ecoplan Natuurontwikkeling                       | Netherlands (the)                                          |
| van der Lee, Robin         | Postdoctoral Fellow                                           | The University of British Columbia                           | Canada                                                     |
| van der Made, Jan          | researcher / paleontologist                                   | Consejo Superior de Investigaciones Científicas              | Spain                                                      |
| van der Meer, Jan Roelof   | Professor in Microbiology                                     | University of Lausanne                                       | Switzerland                                                |
| van der Meer, Yvonne       | Associate Professor Sustainability of Chemicals and Materials | Maastricht University                                        | Netherlands (the)                                          |
| van der Merwe, Stephni     | PhD student                                                   | University of Capet Town                                     | South Africa                                               |
| van der Merwe, Gottlieb    | Systems Engineer Radio Astronomy                              | SARAO                                                        | South Africa                                               |
| van der Plas, Alfons       | postdoctoral researcher, ecology                              | University of Leipzig                                        | Germany                                                    |
| van der Pouw Kraan, Tineke | researcher                                                    | free university medical center                               | Netherlands (the)                                          |
| van der Reijden, Karin     | PhD-student Marine Ecology                                    | University of Groningen                                      | Netherlands (the)                                          |
| van der Sluis, Theo        | Landscape ecologist                                           | Wageningen Environmental Research                            | Netherlands (the)                                          |
| van der Strate, Barry      | Head Research Office                                          | Univeristy of Groningen, University Medical Center Groningen | Netherlands (the)                                          |
| van der Valk, Jan          | postdoctoral researcher, anthropology                         | University of Vienna                                         | Belgium                                                    |
| van der Werf, Hayo         | researcher                                                    | INRA                                                         | France                                                     |
| van der Zwan, Wiea         | Ecologist                                                     |                                                              | New Zealand                                                |
| Van Die, Irma              | Associate Professor, biochemistry                             | VU University Medical Center Amsterdam                       | Netherlands (the)                                          |
| van Dijk, Marc             | Biomolecular sciences                                         | Vrije Universiteit Amsterdam                                 | Netherlands (the)                                          |
| van Dis, Natalie           | PhD Candidate Evolutionary Biology                            | NIOO-KNAW                                                    | Netherlands (the)                                          |
| Van Dongen, Stefan         | professor biology and biostatistics                           | Antwerp University                                           | Belgium                                                    |
| Van Dooren, Tom JM         | CNRS researcher Evolutionary Ecology                          | Sorbonne University Paris                                    | France                                                     |
| van Doorn, G. Sander       | Assistant professor, evolutionary systems biology             | University of Groningen                                      | Netherlands (the)                                          |

|                                     |                                                     |                                                                                  |                                                            |
|-------------------------------------|-----------------------------------------------------|----------------------------------------------------------------------------------|------------------------------------------------------------|
| Van Echelpoel, Wout                 | PhD Candidate                                       | Ghent University                                                                 | Belgium                                                    |
| van Eeden, Lily                     | PhD student in biodiversity conservation            | The University of Sydney                                                         | Australia                                                  |
| van Eldijk, Timo J. B.              | Phd-candidate evolutionary biology                  | Groningen university                                                             | Netherlands (the)                                          |
| van Elsas, Jan Dirk                 | Professor, Microbial Ecology                        | University of Groningen                                                          | Netherlands (the)                                          |
| van Gent, Paul                      | PhD Researcher / Lecturer                           | Delft University of Technology                                                   | Netherlands (the)                                          |
| van Ginkel, Annelies                | PhD-Student Conservation Biology                    | University of Groningen                                                          | Netherlands (the)                                          |
| van Harskamp, Michiel               | PhD Student / Science Education                     | Freudenthal Institute / Utrecht University                                       | Netherlands (the)                                          |
| van Heezik, Yolanda                 | Associate Professor                                 | University of Otago                                                              | New Zealand                                                |
| van Herwerden, Lynne                | Senior Lecturer, College of Science and Engineering | James Cook University                                                            | Australia                                                  |
| van hiel, boris                     | postdoc                                             | KULeuven                                                                         | Belgium                                                    |
| Van Hooreweghe, Floor               | Ecology, Evolution and Biodiversity Conservation    | KU Leuven                                                                        | Belgium                                                    |
| van Kampenhout, Leo                 | PhD candidate (glaciology)                          | Institute for Marine and Atmospheric research Utrecht (IMAU), Utrecht University | Netherlands (the)                                          |
| van Kerkwijk, Marten                | Professor of Astronomy                              | University of Toronto                                                            | Canada                                                     |
| van Kleunen, Mark                   | Professor of Ecology                                | University of Konstanz                                                           | Germany                                                    |
| van Kuijk, Silvy                    | Graduate student, Anthropology                      | The University of Texas at Austin                                                | United States of America (the)                             |
| Van Landuyt, Josefen                | Phd                                                 | Universiteit gent                                                                | Belgium                                                    |
| Van Langenhove, Leandro             | PhD Student                                         | University of Antwerp                                                            | Belgium                                                    |
| Van Look, Jasper                    |                                                     | University of Antwerp                                                            | Belgium                                                    |
| Van Loon, Anne                      | Senior Lecturer Water Science                       | University of Birmingham                                                         | United Kingdom of Great Britain and Northern Ireland (the) |
| Van Maarseveen, Jan                 | Professor of Organic Chemistry                      | University of Amsterdam                                                          | Netherlands (the)                                          |
| van Maldegem, Febe                  | Postdoc in Immuno-Oncology                          | The Francis Crick Institute                                                      | United Kingdom of Great Britain and Northern Ireland (the) |
| van Munster, Manuella               | Researcher in Plant biology                         | INRA                                                                             | France                                                     |
| van Neerbos, Frank Antonie Cornelus | PhD candidate in Entomology                         | Wageningen University & Research + Catholic University of Leuven                 | Netherlands (the)                                          |
| Van Nevel, Lotte                    | Forest & Nature Lab                                 | Ghent University                                                                 | Belgium                                                    |
| van Niel, Guillaume                 | Research Director, Cell biology                     | Institute of Psychiatry and Neurosciences of Paris                               | France                                                     |
| Van Oosten, Raoul                   | Postdoc evolutionary ecology                        | Vrije Universiteit Amsterdam                                                     | Netherlands (the)                                          |
| van Oosterzee, Penny                | Adjunct Associate Professor                         | James Cook University                                                            | Australia                                                  |
| Van Oystaeyen, Annette              | Postdoctoral scientist Biology                      | University of Leuven                                                             | Belgium                                                    |
| van Raaij, Mark                     | Dpto de Estructura de Macromoléculas                | Centro Nacional de Biotecnología - CSIC                                          | Spain                                                      |
| van Rees, Charles                   | Postdoctoral researcher, Conservation Biologist     | Tufts University                                                                 | United States of America (the)                             |
| van Rhijn, Jon-Ruben                | Postdoctoral fellow Neuroscience                    | Radboudumc Nijmegen                                                              | Netherlands (the)                                          |
| van Rooyen, Lulu                    | Postdoctoral researcher                             | University of KwaZulu-Natal                                                      | South Africa                                               |
| van Schooten, Bas                   | ecology                                             | UPR-RP                                                                           | United States of America (the)                             |
| Van Schuylenbergh, Patricia         | Senior researcher - History of Environment          | Royal Museum of Central Africa                                                   | Belgium                                                    |
| Van Sluys, Monique                  | Wildlife Conservation Officer                       | Taronga Conservation Society Australia                                           | Australia                                                  |
| Van Soest, Rob                      | associate scientist                                 | Naturalis Biodiversity Center                                                    | Netherlands (the)                                          |
| Van Steenberge, Maarten             | Scientist                                           | Royal Belgian Institute for Natural Sciences                                     | Belgium                                                    |

|                               |                                                                                |                                                                                |                                                               |
|-------------------------------|--------------------------------------------------------------------------------|--------------------------------------------------------------------------------|---------------------------------------------------------------|
| Van Steenberghe, Laure        | PhD student                                                                    | Ghent University                                                               | Belgium                                                       |
| van Strien, Maarten J.        | Senior researcher                                                              | ETH Zurich                                                                     | Switzerland                                                   |
| Van Sundert, Kevin            | PhD researcher in Biology                                                      | University of Antwerp                                                          | Belgium                                                       |
| van Terwingen, Steven         | PhD student, Inorganic Chemistry                                               | RWTH Aachen University                                                         | Germany                                                       |
| van Treeck, Shari             | PhD Student - Geophysics                                                       | University of Bonn                                                             | Germany                                                       |
| Van Treeck, Ruben             | Ecology                                                                        | IGB Berlin                                                                     | Germany                                                       |
| van Trigt, Radboud            | Scientific director biomarkers                                                 |                                                                                | Netherlands (the)                                             |
| van Veelen, Pieter            | PhD Candidate                                                                  | Groningen Institute for Evolutionary Life Sciences,<br>University of Groningen | Netherlands (the)                                             |
| van Veen, Frank               | Associate Professor of Ecology and Conservation                                | University of Exeter                                                           | United Kingdom of Great Britain<br>and Northern Ireland (the) |
| van vliet, Jasper             | Assistant Professor in Environmental Geography                                 | VU University Amsterdam                                                        | Netherlands (the)                                             |
| van Vliet, Peter              | Environmental Toxicologist                                                     | Board for the Authorisation of Pesticides                                      | Netherlands (the)                                             |
| van Vliet, Arnold             | PhD Biology                                                                    | Wageningen University & Research                                               | Netherlands (the)                                             |
| van Vliet, Oscar              | Lecturer                                                                       | ETH Zürich                                                                     | Switzerland                                                   |
| van Vuuren, Gary              | Nuclear physicist                                                              | Atomic Energy Corporation, South Africa                                        | United Kingdom of Great Britain<br>and Northern Ireland (the) |
| Van Wassenhove, Eva           | Master Biology                                                                 | UAntwerpen                                                                     | Belgium                                                       |
| Van Wijmeersch, Paul          | MSc in Agricultural Sciences                                                   |                                                                                | Belgium                                                       |
| Van Wissen van Veen, Lynn     | Engineer and climate scientist                                                 | Wageningen University                                                          | Netherlands (the)                                             |
| van Woesik, Robert            | Professor                                                                      | Florida Institute of Technology                                                | United States of America (the)                                |
| van Wyk, Stephanie            | Researcher (PhD) Microbiology, Genetics,<br>Biochemistry                       | University of Pretoria                                                         | South Africa                                                  |
| van Zinnicq Bergmann, Maurits | PhD candidate                                                                  | Florida International University                                               | United States of America (the)                                |
| Vanacker, Marie               | Project manager / Risk Assessment                                              | ANSES                                                                          | France                                                        |
| Vanalderweireldt, Lucie       | Postdoctoral Researcher                                                        | Université du Québec à Chicoutimi                                              | Canada                                                        |
| Vandegheer, Rebecca           | Postdoctoral Research Fellow                                                   | Western Sydney University                                                      | Australia                                                     |
| Vandelac, Louise              | Professor, Institute for environmental sciences and<br>Department of Sociology | Université du Québec à Montréal                                                | Canada                                                        |
| Vandeman, Mike                | Mathematics & Psychology                                                       |                                                                                | United States of America (the)                                |
| Vandenboer, Yens              | Marine biology                                                                 | Ghent University                                                               | Belgium                                                       |
| VandenBoer, Trevor            | Assistant Professor - Environmental Analytical<br>Chemistry                    | York University                                                                | Canada                                                        |
| Vandenbroucke, Dirk           | Dr. Sc. - Research Scientist                                                   | Agfa NV                                                                        | Belgium                                                       |
| Vandeputte, Marc              | Fish Geneticist                                                                | INRA                                                                           | France                                                        |
| Vander Linden, Charles        | Soil scientist                                                                 | Earth and Life Insititute, Université catholique de<br>Louvain                 | Belgium                                                       |
| Vanderbush, Joel              | Curator of Conservation, Zoology                                               | Niabi Zoological Park                                                          | United States of America (the)                                |
| Vandersteen, James            | Conservation Ecology                                                           | The University of Sydney                                                       | Australia                                                     |
| Vandervaere, JP               | University teacher / Hydrology                                                 | IGE Grenoble                                                                   | France                                                        |
| Vandevoorde, Noé              | Physics                                                                        | Université Libre de Bruxelles                                                  | Belgium                                                       |
| Vandewalle-Capo, Marine       | Postdoc in Molecular Biology                                                   | Umeå University                                                                | Sweden                                                        |

|                                 |                                                                       |                                                        |                                                            |
|---------------------------------|-----------------------------------------------------------------------|--------------------------------------------------------|------------------------------------------------------------|
| Vandrovcova, Marta              | Principal investigator - Cell biology                                 | Institute of Physiology, the Czech Academy of Sciences | Czech Republic (the)                                       |
| Vandrovcová, Tereza             | Sociology, Critical Animal Studies                                    | University of New York in Prague                       | Czech Republic (the)                                       |
| Vandvik, Vigdis                 | Professor, Plant Ecology                                              | University of Bergen                                   | Norway                                                     |
| Vangansbeke, Pieter             |                                                                       | Universiteit Gent, ForNaLab                            | Belgium                                                    |
| Vanhaeren, Nina                 | PhD student                                                           | Ghent University                                       | Belgium                                                    |
| vanhille, josefine              | researcher                                                            | university of antwerp                                  | Belgium                                                    |
| Vanholsbeeck, Olivier           | Researcher                                                            | IGB Berlin                                             | Germany                                                    |
| Vanmaercke, Matthias            | Lecturer, Department of Geography                                     | University of Liege                                    | Belgium                                                    |
| Vanmarcke, Gert                 | pH student in biotechnology                                           | VIB / KULeuven                                         | Belgium                                                    |
| VanMetter, Richard              | Senior Research Physicist (retired)                                   | Eastman Kodak Company                                  | United States of America (the)                             |
| Vanpé, Cécile                   | Research Engineer in Wildlife ecology and conservation                | Office Français de la Biodiversité                     | France                                                     |
| Vanreppelen, Giel               | PhD                                                                   | KU Leuven                                              | Belgium                                                    |
| Vanuytrecht, Eline              | Research & Development Climate                                        | VITO - Flemish Institute for Technological Research    | Belgium                                                    |
| Vanwonterghem, Inka             | Postdoctoral Research Fellow in marine microbial ecology              | University of Queensland                               | Australia                                                  |
| Vanzetta, Ivo                   | Senior Permanent Researcher / Neuroscience                            | CNRS                                                   | France                                                     |
| Varaden, Diana                  | Environmental Science                                                 | King' s College London                                 | United Kingdom of Great Britain and Northern Ireland (the) |
| Varah, Alexa                    | Postdoctoral researcher, ecology                                      | Institute of Zoology                                   | United Kingdom of Great Britain and Northern Ireland (the) |
| Varaldi, Julien                 | Assistant Professor                                                   | University Lyon 1                                      | France                                                     |
| Varassin, Isabela               | Professor/Ecology                                                     | Universidade Federal do Paraná                         | Brazil                                                     |
| Vardag, Sanam                   | Environmental Physics                                                 | Heidelberg Center for the Environment                  | Germany                                                    |
| Varela, Susana A. M.            | Post-doctoral Researcher                                              | IGC - Instituto Gulbenkian de Ciência                  | Portugal                                                   |
| Varelas, Vassileios             | Researcher                                                            | Biodynamic Research Institute                          | Sweden                                                     |
| Varga, Nóra                     | biologist                                                             | MTA Centre for Ecological Research                     | Hungary                                                    |
| Vargas Gastélum, Lluvia Beatriz | PhD. Student                                                          | CICESE                                                 | Mexico                                                     |
| Vargas Parada, Laura            | Molecular Biology and Immunoparasitology, Biology, School of Sciences | Universidad Nacional Autónoma de México (UNAM)         | Mexico                                                     |
| VARGAS PONCINI, JOSE LUIS       | BIOLOGIST. CIVIL SERVANT                                              | CEDEX. MINISTRY FOR ECOLOGICAL TRANSITION              | Spain                                                      |
| Vári, Ágnes                     | researcher, ecologist                                                 | MTA Centre for Ecological Research                     | Hungary                                                    |
| Variawa, Tasneem                | Conservation scientist                                                | SANBI                                                  | South Africa                                               |
| Varon-Garcia, Daniela           | Biologist                                                             | Universidad Icesi                                      | Colombia                                                   |
| Varonen, Sirkka                 | Psychotherapist, Psychology                                           |                                                        | Switzerland                                                |
| Varsamopoulou, Evy              | Associate Professor                                                   | University of Cyprus                                   | Cyprus                                                     |
| Vasconcellos, Perola de Castro  | Professor/researcher                                                  | Institute of Chemistry - University of Sao Paulo       | Brazil                                                     |
| VASCONCELLOS, ANGELICA          | Assistant Professor, Environmental Sciences                           | Pontifical Catholic University of Minas Gerais         | Brazil                                                     |
| Vasey, Adrianne                 | Assistant Teaching Professor                                          | The Pennsylvania State University                      | United States of America (the)                             |
| Vasilevska, Marinela            | PhD Geneticist                                                        | Clinical Hospital Acibadem Sistina                     | Macedonia, Republic of (the former Yugoslavia)             |

|                              |                                                 |                                                                                                                   |                                                |
|------------------------------|-------------------------------------------------|-------------------------------------------------------------------------------------------------------------------|------------------------------------------------|
| Vasishth, Ashwani            | Associate Professor of Sustainability           | Ramapo College of New Jersey                                                                                      | United States of America (the)                 |
| Vasques, Ana                 | Senior Lecturer                                 | Erasmus University Rotterdam                                                                                      | Netherlands (the)                              |
| Vasquez Correa, Angelly      | Graduate student                                | McGill University                                                                                                 | Canada                                         |
| Vasselon, Valentin           | Postdoctoral researcher - Aquatic Ecology       | AFB                                                                                                               | France                                         |
| Vasser, Madis                | PhD student in informatics                      | University of Tartu                                                                                               | Estonia                                        |
| Vassiliadis, Christine       | Assistant Professor                             | Universite Paris Sud                                                                                              | France                                         |
| Vatanen, Tommi               | Research Fellow                                 | University of Auckland                                                                                            | New Zealand                                    |
| VATANT d'OLLONE, Jan         | PhD Student                                     | LMD / IPSL / Sorbonne University                                                                                  | France                                         |
| Vats, Gargi                  | M.Sc. Biodiversity and Conservation             | Guru Gobind Singh Indraprastha University                                                                         | India                                          |
| Vaughan, Brian               | Staff Scientist                                 | Primordial Genetics                                                                                               | United States of America (the)                 |
| Vaz, Carlota                 | Social Sciences, Social Policy                  |                                                                                                                   | Portugal                                       |
| Vaz-de-Mello, Fernando       | professor                                       | Universidade Federal de Mato Grosso                                                                               | Brazil                                         |
| Vazey, Elena                 | Assistant Professor                             | –                                                                                                                 | United States of America (the)                 |
| Vazquez, Luis                | Agroecology                                     | Retired                                                                                                           | Cuba                                           |
| Vazquez, Luis-Bernardo       | Senior Researcher                               | El Colegio de la Frontera Sur                                                                                     | Mexico                                         |
| Vázquez, Víctor              | PhD Student of Molecular Ecophysiology          | Department of Ecology, Faculty of Science, University of Málaga, Spain & Cocosphere Environmental Analysis, Spain | Spain                                          |
| Vázquez-Domínguez, Ella      | Professor                                       | Universidad Nacional Autónoma de México                                                                           | Mexico                                         |
| Veclin, Cloé                 | PhD Student, Analytical Chemistry               | Institute of Analytical Sciences and Physico-Chemistry for Environment and Materials (IPREM)                      | France                                         |
| Vedor, Marisa                | PhD student                                     | CIBIO-InBio, Universidade do Porto                                                                                | Portugal                                       |
| Veenvliet, Jesse             | Post-Doctoral Researcher                        | Max Planck Institute for Medical Genetics                                                                         | Germany                                        |
| Vega, Cristina               | PhD                                             | GEOMARE Investigación Terrestre y Marina. Julio Berdegué Aznar 457 CP 82110. Mazatlán, Sinaloa, México.           | Mexico                                         |
| Vega-Cendejas, Maria Eugenia | Researcher                                      | Centro de Investigación y de Estudios Avanzados del IPN                                                           | Mexico                                         |
| Veiga, Joana                 | Marine Pollution                                | Deltares                                                                                                          | Netherlands (the)                              |
| Velasco, Ana                 | professor and researcher/ Sociology             | UPM- Universidad Politécnica de Madrid                                                                            | Spain                                          |
| Velasco, Julian              | PhD                                             | Centro de Ciencias de la Atmósfera, Universidad Nacional Autónoma de México                                       | Mexico                                         |
| Velasco, Dandara             | PhD Student                                     | LIPhy                                                                                                             | France                                         |
| Velástegui-Montoya, Andrés   | Environmental Sciences Researcher and professor | Escuela Superior Politécnica del Litoral                                                                          | Ecuador                                        |
| Velazco, Aileen T.           | Marine Biologist                                |                                                                                                                   | Puerto Rico                                    |
| Velazquez, Víctor            | Teacher, Physics                                | UNAM                                                                                                              | Mexico                                         |
| Veldhuis, Michiel            | Assistant Professor in Environmental Biology    | Leiden University                                                                                                 | Netherlands (the)                              |
| Velevski, Metodija           | Ornithologist                                   | Macedonian Ecological Society                                                                                     | Macedonia, Republic of (the former Yugoslavia) |
| Velez, Leandro               | PostDoctoral Fellow                             | CONICET Argentina                                                                                                 | Argentina                                      |
| Velez, Jorge                 | Professor                                       | Universidad Nacional de Colombia                                                                                  | Colombia                                       |
| Velez-Zuazo, Ximena          | Marine Managing Director, BMAP-Peru             | Smithsonian Conservation Biology Institute                                                                        | Peru                                           |

|                                           |                                                                     |                                                        |                                |
|-------------------------------------------|---------------------------------------------------------------------|--------------------------------------------------------|--------------------------------|
| Velghe, Katherine                         | Research professional, Biology                                      | Université du Québec à Montréal                        | Canada                         |
| Venables, Dean                            | Lecturer in Physical and Environmental Chemistry                    | University College Cork                                | Ireland                        |
| Vendeth Scavassa, Anelize                 | Biologist                                                           |                                                        | Brazil                         |
| Veneklaas, Erik                           | Plant Physiological Ecology                                         | University of Western Australia                        | Australia                      |
| Venier, Marta                             | Environmental Chemistry                                             | Indiana University                                     | United States of America (the) |
| Venkatasamy, Ramakrishna                  | Director                                                            | EnvironSolutions Ltd                                   | Mauritius                      |
| Venkatesan, Madhavi                       | Assistant Professor, Economics                                      | Northeastern University                                | United States of America (the) |
| Venmans, Frank                            | Professor Environmental Economics                                   | UMONS                                                  | Belgium                        |
| Venn, Susanna                             | Plant Ecologist                                                     | Deakin University                                      | Australia                      |
| Venolia, Lee                              | geneticist                                                          | Williams College                                       | United States of America (the) |
| Venter, Stephanus                         | Microbiology                                                        | University of Pretoria                                 | South Africa                   |
| Venter, Anita                             | Post-natural philosophy and implementation                          | University of the Free State                           | South Africa                   |
| Venter, Arthurita                         | Phycology                                                           | North-west University Potchefstroom                    | South Africa                   |
| Ventura, Beth                             | Animal science                                                      |                                                        | United States of America (the) |
| Vera, Víctor                              | Biologist, ecological restoration                                   | Facultad Politécnica, Universidad Nacional de Asunción | Paraguay                       |
| Verbeeck, Hans                            | Professor, forest ecology                                           | Ghent University                                       | Belgium                        |
| Verbeek, Sarah                            | Doctoral student of biophysical chemistry                           | University of Göttingen                                | Germany                        |
| Verbeke, Sarah                            | PhD student in Bioscience Engineering (Laboratory of Plant Ecology) | Ghent University                                       | Belgium                        |
| Verberk, Wilco                            | Assistant Professor                                                 | Radboud University Nijmegen                            | Netherlands (the)              |
| Verbeylen, Goedeke                        | scientific attaché, mammal ecology                                  | Natuurpunt Studie                                      | Belgium                        |
| Verchinski, Stephen                       | Natural Resources Management and Forestry                           | S.U.N.Y. Syracuse                                      | United States of America (the) |
| VERCRUYSE, Nathalie                       | Foresight (Initial Diploma: Graduated engineer in chemistry)        | European Commission                                    | Belgium                        |
| Verdade, Vanessa                          | Associate Professor                                                 | Federal University of ABC (UFABC)                      | Brazil                         |
| Verdade, Luciano                          | Associate Professor                                                 | University of São Paulo                                | Brazil                         |
| Verdaguer, Dolors                         | Professor                                                           | University of girona                                   | Spain                          |
| Verde Selva, Gracie                       | Environmental Public Policy PhD                                     | Brazilian Institute of Development and Sustainability  | Brazil                         |
| Verdonck, Rik                             | Post doctoral researcher in biology                                 | CNRS                                                   | France                         |
| Verdoya, Massimo                          | Professor of Geophysics                                             | DISTAV - Univerisità di Genova                         | Italy                          |
| Vergara, Walter                           | Climate Change                                                      | WRI                                                    | United States of America (the) |
| Vergara, Juan J.                          | Professor Ecology                                                   | Univ. Cadiz                                            | Spain                          |
| Vergeiner, Johannes                       | Climate research                                                    | Zentralanstalt für Meteorologie und Geodynamik         | Austria                        |
| Vergueiro Júnior, Alexandre Manoel Kirilo | Doctor student                                                      | National Institute of Amazon Researches                | Brazil                         |
| Verhagen, Teun                            | PhD Student                                                         | CML, department of Industrial Ecology                  | Netherlands (the)              |
| Verhelst, Pieterjan                       | Postdoctoral researcher                                             | Ghent University                                       | Belgium                        |
| Verhey, Steve                             | Plant Molecular Biology                                             | Wahluk High School                                     | United States of America (the) |
| Verheyden, Hélène                         | researcher in behavioural ecology of wildlife                       | INRA                                                   | France                         |
| Verheyen, Erik                            | Scientist                                                           | Royal Belgian Institute of Natural Sciences            | Belgium                        |

|                               |                                                                                                                                                                                    |                                                                                            |                                                            |
|-------------------------------|------------------------------------------------------------------------------------------------------------------------------------------------------------------------------------|--------------------------------------------------------------------------------------------|------------------------------------------------------------|
| Verhoef, Anne                 | Professor of Soil physics and Micrometeorology                                                                                                                                     | The University of Reading                                                                  | United Kingdom of Great Britain and Northern Ireland (the) |
| Verhulst, Simon               | Professor of the Evolutionary Biology of Ageing                                                                                                                                    | University of Groningen                                                                    | Netherlands (the)                                          |
| Veríssimo, Nuno               | Herbarium Technician (Biology)                                                                                                                                                     | Plantentuin Meise                                                                          | Belgium                                                    |
| Verkuil, Yvonne               | Molecular ecologist                                                                                                                                                                | Conservation Ecology Group, Groningen Institute for Life Sciences, University of Groningen | Netherlands (the)                                          |
| Vermeij, Mark                 | Science director                                                                                                                                                                   | Carmabi Foundation                                                                         | Curaçao                                                    |
| Vernaëve, Hans                | Mathematics                                                                                                                                                                        | Ghent University                                                                           | Belgium                                                    |
| Vernay, Antoine               | Postdoc, plant ecology and ecophysiology                                                                                                                                           | SLU, Forest Ecology and Management Department                                              | Sweden                                                     |
| Verneir, Camille              | Research engineer - Bio-mathematics                                                                                                                                                |                                                                                            | France                                                     |
| Vernon, Philippe              | CNRS Research Director in Ecology                                                                                                                                                  | University of Rennes 1                                                                     | France                                                     |
| Vernon, Richard               | Retired, Tropical Agricultural Research Scientist, formerly Chief Agricultural Research Officer, Ministry of Agriculture, Zambia, & Dept for International Development, London, UK | Now: Population Matters charity, Secretary of Oxford UK branch                             | United Kingdom of Great Britain and Northern Ireland (the) |
| Veron, John (Charlie)         | Scientist                                                                                                                                                                          | CRR                                                                                        | Australia                                                  |
| Veron, Geraldine              | Professor - Systematics, biogeography and conservation                                                                                                                             | Museum National d'Histoire Naturelle, Paris                                                | France                                                     |
| Veronese, Elisa               | Environmental Engineer, PhD student in Photovoltaic Systems                                                                                                                        | EURAC Research                                                                             | Italy                                                      |
| Verrelst, Jochem              |                                                                                                                                                                                    | University of Valencia                                                                     | Spain                                                      |
| Verro, Kristiina              | PhD Student in Astrophysics                                                                                                                                                        | Kapteyn Astronomical Institute, University of Groningen                                    | Netherlands (the)                                          |
| Verschoor, Mark               | PhD candidate                                                                                                                                                                      | University of Groningen                                                                    | Netherlands (the)                                          |
| Verschuuren, Jonathan         | Professor of international and European environmental law                                                                                                                          | Tilburg University                                                                         | Netherlands (the)                                          |
| Versluijs, Erik               | Master student in Applied Ecology                                                                                                                                                  | inland Norway university of applied science                                                | Norway                                                     |
| Verweij, Pita                 | Associate Professor ecology                                                                                                                                                        | Utrecht University, Copernicus Inst. of Sustainable Development                            | Netherlands (the)                                          |
| Vesely, Cornelia              | Postdoc/Medical Sciences                                                                                                                                                           | Medical University of Vienna                                                               | Austria                                                    |
| Vesenka, James                | Professor of Physics                                                                                                                                                               | University of New England                                                                  | United States of America (the)                             |
| Vesga Aguado, Maria del Pilar | PhD Student                                                                                                                                                                        | ETH Zurich                                                                                 | Switzerland                                                |
| Vesga Blanco, Paola Marcela   | Bióloga independiente                                                                                                                                                              |                                                                                            | Colombia                                                   |
| Vested, Malene                | PhD Coastal Engineering                                                                                                                                                            | Technical University of Denmark                                                            | Denmark                                                    |
| Vet, Louise                   | Director Netherlands Institute of Ecology (NIOO-KNAW) and professor in Ecology Wageningen University                                                                               | Netherlands Institute of Ecology (NIOO-KNAW)                                               | Netherlands (the)                                          |
| Veteto, James                 | Associate Professor of Environmental Anthropology                                                                                                                                  | Western Carolina University                                                                | United States of America (the)                             |
| Vetter, Vanessa               | research assistant                                                                                                                                                                 | University of Koblenz-Landau                                                               | Germany                                                    |
| VEYRUNES, Frederic            | CNRS researcher in Evolutionary Biology                                                                                                                                            | CNRS                                                                                       | France                                                     |
| Veytia, Devi                  | PhD Candidate in Oceans and Cryosphere                                                                                                                                             | Institute of Marine and Antarctic Studies                                                  | Australia                                                  |
| Vézina, Nicole                | Professeure titulaire (ergonomie)                                                                                                                                                  | Université du Québec à Montréal                                                            | Canada                                                     |
| Vezzulli, Luigi               | Professor                                                                                                                                                                          | University of Genoa                                                                        | Italy                                                      |

|                         |                                                      |                                                                               |                                                            |
|-------------------------|------------------------------------------------------|-------------------------------------------------------------------------------|------------------------------------------------------------|
| Via, Sara               | Professor                                            | University of Maryland, College Park                                          | United States of America (the)                             |
| Viana, Blandina         | Professor/Ecology                                    | Federal University of Bahia                                                   | Brazil                                                     |
| Viana, Duarte           | Postdoc                                              | German Centre for Integrative Biodiversity Research (iDiv) Halle-Jena-Leipzig | Germany                                                    |
| Viana, Pedro            | Professor Auxiliar, Astronomy                        | Universidade do Porto                                                         | Portugal                                                   |
| Viane, Ronald           | Botany                                               | Ghent University                                                              | Belgium                                                    |
| Viaud, Valérie          | Agronomist                                           | INRA                                                                          | France                                                     |
| Viblanç, Vincent A      | Researcher                                           | CNRS                                                                          | France                                                     |
| Vicca, Sara             | Researcher / Global Change Ecology                   | University of Antwerp                                                         | Belgium                                                    |
| Vicent, Jorge           | Remote sensing scientist                             | Magellium                                                                     | France                                                     |
| Vicente, Eduardo        | PhD student                                          | Universidad de Alicante                                                       | Spain                                                      |
| Vickers-Rich, Patricia  | Chair in Palaeontology/Palaeobiology                 | Monash University and Swinburne University of Technology                      | Australia                                                  |
| Victorero, Lissette     | Post-doctoral researcher                             | Muséum national d'Histoire naturelle                                          | France                                                     |
| Vida, Gabor             | Professor emeritus                                   | Hungarian Academy of Sciences                                                 | Hungary                                                    |
| Vidal, Eric             | Senior Scientist Conservation Biology                | IRD                                                                           | New Caledonia                                              |
| Vidal, Rodrigo          | Civil Engineer                                       | PUCE                                                                          | Ecuador                                                    |
| Vidal, Jean-Philippe    | Hydroclimatologist                                   | Irstea                                                                        | France                                                     |
| Vidal, Florian          | Political Science/History                            | Paris Interdisciplinary Energy Research Institute                             | France                                                     |
| Vidal, Nicolas          | Assistant Professor                                  | MNHN                                                                          | France                                                     |
| Vidal, Cynthia          | Research fellow in physics                           | Imperial College London                                                       | United Kingdom of Great Britain and Northern Ireland (the) |
| Vidal Merino, Mariana   | Climate Change Adaptation                            | Technische Universitaet Dresden                                               | Germany                                                    |
| Vidal-Dupiol, Jeremie   | Permanent reasercher                                 | IFREMER                                                                       | France                                                     |
| Vidaller, Christel      | Postdoctoral researcher                              | IMBE                                                                          | France                                                     |
| Videla, Maria Laura     | Ecological Economics                                 | WU Wien                                                                       | Austria                                                    |
| Vidick, Nicolas         | Regulatory toxicologist                              | Sciensano (Public Health Institute)                                           | Belgium                                                    |
| Viegas, Ana Cristina    | Assistant Professor (Microbiology)                   | Instituto Superior Técnico - University of Lisbon                             | Portugal                                                   |
| Viegas, Ivan            | Reseacher                                            | Universidade de Coimbra                                                       | Portugal                                                   |
| Viehboeck, Tobias       | PhD Student                                          | University of Vienna                                                          | Austria                                                    |
| Vieira, Leandro Manzoni | Professor of Zoology                                 | Universidade Federal de Pernambuco                                            | Brazil                                                     |
| Vieira, Raísa           | Postdoctoral reasearcher                             | Federal University of Goiás (UFG)                                             | Brazil                                                     |
| Vieira, Armando         | Professor Senior                                     | University Federal of São Carlos                                              | Brazil                                                     |
| Vieira, Simone          | Researcher/Ecosystem Ecology                         | NEPAM/UNICAMP                                                                 | Brazil                                                     |
| Vieira, Marcus Vinícius | Professor, Population and Landscape Ecology          | Universidade Federal do Rio de Janeiro                                        | Brazil                                                     |
| Vieira, Diana           | Researcher in Environmental Sciences and Engineering | University of Aveiro, CESAM - Centre for Environmental and Marine Studies     | Portugal                                                   |
| Vieira, Joana           | Junior Researcher                                    | University of Coimbra                                                         | Portugal                                                   |
| Vieites, David          | Senior Research Scientist                            | Consejo Superior de Investigaciones Científicas                               | Spain                                                      |
| Viennet, David          | PhD student in environmental geosciences             | Université de Rouen                                                           | France                                                     |
| Viganò, Daniele         | Post-doc researcher in Astrophysics                  | Univeristy of the Balearic Islands                                            | Spain                                                      |

|                                  |                                               |                                                                |                                                            |
|----------------------------------|-----------------------------------------------|----------------------------------------------------------------|------------------------------------------------------------|
| Vighi, Morgana                   | Post doctoral researcher in Marine Biology    | University of Barcelona                                        | Spain                                                      |
| Vighi, Marco                     | Senior Scientist Ecotoxicology                | IMDEA Water Institute                                          | Spain                                                      |
| Vignati, Davide A.L.             | Researcher / Ecotoxicology                    | CNRS                                                           | France                                                     |
| Vignes, Matthieu                 | Senior Lecturer in Statistical Genetics       | Massey University                                              | New Zealand                                                |
| Vignieri, Sacha                  | Deputy Editor                                 | Science                                                        | United States of America (the)                             |
| Vila, Magda                      | Biological ecology - phytoplankton            | Institu de Ciències del Mar (CSIC)                             | Spain                                                      |
| Vilà Planella, Montserrat        | Research Professor                            | EBD-CSIC                                                       | Spain                                                      |
| Vila-Concejo, Ana                | Associate Professor                           | The University of Sydney                                       | Australia                                                  |
| Vilagrosa, Alberto               | Research in ecology                           | Depr Ecology, Univ Alicante_Fundacion CEAM                     | Spain                                                      |
| VILAIN, christiane               | History of physics                            | Observatoryof Paris-Meudon and University Denis Diderot        | France                                                     |
| Vilar, Ciro                      | Postdoc                                       | Universidade Federal do Espírito Santo                         | Brazil                                                     |
| Vilardy, Sandra                  |                                               | Los Andes University                                           | Colombia                                                   |
| Vilas, Cesar                     | Researcher Marine Ecology                     | IFAPA-ANDALUCIA GOVERNMENT                                     | Spain                                                      |
| Vilasboa, Anderson               |                                               | UERJ                                                           | Brazil                                                     |
| Vilches, Oscar                   | Physicist                                     |                                                                | United States of America (the)                             |
| Vilela, Roberto                  | Public Health Technologist                    | Fiocruz                                                        | Brazil                                                     |
| Vilhelmsson, Andreas             | Researcher (PhD) in Public Health             | Lund University                                                | Sweden                                                     |
| Villa, Pedro Manuel              | PhD in Ecology                                | Federal University of Vicosa                                   | Brazil                                                     |
| Vilà-Freixa, Jordi               | Full Professor; Computational chemistry       | Universitat Internacional de Catalunya                         | Spain                                                      |
| VILLA-NAVARRO, FRANCISCO ANTONIO | RESEARCH PROFESSOR                            | UNIVERSIDAD DEL TOLIMA                                         | Colombia                                                   |
| Villacañas de Castro, Carmen     | Ecology                                       | Universität Bremen                                             | Germany                                                    |
| Villamil, Nora                   |                                               | University of Edinburgh                                        | United Kingdom of Great Britain and Northern Ireland (the) |
| Villar, Nacho                    | Postdoctoral Fellow                           | UNESP Rio Claro                                                | Brazil                                                     |
| Villar, Rafael                   | Ecology Professor                             | University of Cordoba                                          | Spain                                                      |
| Villarreal, María Luisa          | Head Natural Products Laboratory              | Universidad Autónoma del Estado de Morelos                     | Mexico                                                     |
| Villasante, Sebastian            |                                               | Universidad Santiago de Compostela                             | Spain                                                      |
| Villasante, Francisco            | Researcher/Ecologist                          | Universidad Nacional de San Agustín de Arequipa                | Peru                                                       |
| Villavicencio-Queijeiro, Alexa   | Researcher in Forensic Genetics               | UNAM                                                           | Mexico                                                     |
| Villegas, Juan Camilo            | Profesor Asociado                             | Universidad de Antioquia                                       | Colombia                                                   |
| Villegas, Nahuel                 | Chief Scientist Officer                       |                                                                | United Kingdom of Great Britain and Northern Ireland (the) |
| Villegas-Montes, Martha Leonor   | Biologist                                     | University of Roehampton                                       | United Kingdom of Great Britain and Northern Ireland (the) |
| Villela, Dora M.                 | Associate Professor/ Plant Ecologist          | Universidade Estadual do Norte Fluminense Darcy Ribeiro (UENF) | Brazil                                                     |
| Villela, Alexandre               | Junior researcher, natural products chemistry | Wageningen University and Research                             | Netherlands (the)                                          |
| Villela, Helena                  | Researcher                                    | UFRJ                                                           | Brazil                                                     |
| Villemare-Côté, Olivier          | PhD candidate in forest sciences              | Université Laval                                               | Canada                                                     |
| Villero, Dani                    | Researcher                                    | Forest Sciences Center of Catalonia                            | Spain                                                      |

|                           |                                                                                                        |                                                                           |                                                            |
|---------------------------|--------------------------------------------------------------------------------------------------------|---------------------------------------------------------------------------|------------------------------------------------------------|
| Villoch, Pablo            | Director / Facilitator                                                                                 | Glocalminds                                                               | Chile                                                      |
| Villoria, Manuel          | Professor                                                                                              | King Juan Carlos University                                               | Spain                                                      |
| Vina, Luis                | Full Professor Condensed Matter Physics                                                                | Universidad Autonoma de Madrid                                            | Spain                                                      |
| Vincenot, Christian       | Assistant Professor in Ecology/Informatics                                                             | Kyoto University                                                          | Japan                                                      |
| Vincent, Frederic         | Astrophysicist                                                                                         | CNRS / Observatoire de Paris / LESIA                                      | France                                                     |
| Vincent, Maibach          |                                                                                                        | Max Planck Institute for Evolutionary Anthropology                        | Germany                                                    |
| Vincent, Rinterknecht     | Researcher                                                                                             | CNRS                                                                      | France                                                     |
| Vincent, Julia            | phD candidate                                                                                          |                                                                           | France                                                     |
| VINCENT, Florian          | PhD Student                                                                                            | iEES Paris                                                                | France                                                     |
| Vincentz, Michel          | Professor genetics                                                                                     | UNICAMP                                                                   | Brazil                                                     |
| Vincke, Caroline          | Professor in Forest Sciences                                                                           | Université catholique de Louvain                                          | Belgium                                                    |
| Vincze, Orsolya           | Post Doc                                                                                               | Babes-Bolyai University                                                   | Romania                                                    |
| Vindenes, Yngvild         | Associate professor in ecology and evolution                                                           | University of Oslo                                                        | Norway                                                     |
| Vine, Edward              | Retired Ecologist                                                                                      |                                                                           | United States of America (the)                             |
| Viniegra, Ana             | Bióloga                                                                                                | UNAM                                                                      | Mexico                                                     |
| Vinje, Jessica            | Botanist/Biologist                                                                                     | Conservation Biology Institute                                            | United States of America (the)                             |
| Vinolo, Marco Aurélio     | Immunology                                                                                             | University of Campinas                                                    | Brazil                                                     |
| Viñuela, Javier           | Investigador Científico del CSIC in Natural Resources Area, working on Ecology and Wildlife Management | Instituto de Investigación en Recursos Cinegéticos (IREC; CSIC-UCLM-JCCM) | Spain                                                      |
| Vinyoles, Dolors          | Associate Professor                                                                                    | University of Barcelona                                                   | Spain                                                      |
| Viola, Eduardo            | Professor of International Relations                                                                   | University of Brasilia                                                    | Brazil                                                     |
| Viola, Benjamin           | Ecology and Biological Oceanography                                                                    |                                                                           | Australia                                                  |
| VIOLATO ESPADA, ANA       | PhD Candidate                                                                                          | University of Florida                                                     | United States of America (the)                             |
| Violino, Paolo            | Professor (retired)                                                                                    | Dipartimento di Fisica, Università di Torino, Italy                       | Italy                                                      |
| Viotti, Sofia             | MSc Marine Biology                                                                                     | University of La Laguna                                                   | Spain                                                      |
| Vipond, Joe               | Cinical Assistant Professor, Emergency Medicine                                                        | University of Calgary Cummings School of Medicine                         | Canada                                                     |
| Virga, Vint               | wildlife conservation and welfare veterinarianVet                                                      | Veterinary Wildlife Behavior, Welfare, & Conservation                     | United States of America (the)                             |
| Virginio, Flávia          | Scientific Researcher and Curator of Entomological Collection                                          | Fundação Butantan                                                         | Brazil                                                     |
| Virkkala, Raimo           | Leading Researcher                                                                                     | Finnish Environment Institute                                             | Finland                                                    |
| Virtasalo, Joonas         | Senior Scientist, Marine Geology                                                                       | Geological Survey of Finland (GTK)                                        | Finland                                                    |
| Visconti, Maria Aparecida | Associate Professor- Physiology                                                                        | Instituto de Biociências - Universidade de São Paulo                      | Brazil                                                     |
| Vishniac, Ethan           | Editor in Chief & and Research Professor, Astrophysics                                                 | Johns Hopkins University                                                  | United States of America (the)                             |
| Vishwakarma, Medhavi      | Research Associate/ Biology                                                                            | School of cellular and molecular medicine                                 | United Kingdom of Great Britain and Northern Ireland (the) |
| Vishwanath, Sadhanandh    | Mathematics                                                                                            | Chennai Mathematical Institute                                            | India                                                      |
| Visintin, Francesca       | Ecological Economist                                                                                   | eFrame ltd                                                                | Italy                                                      |
| Visser, Yvonne            | Neuroscientist                                                                                         | INSERM, France                                                            | France                                                     |
| Visser, Diederik          | Chair, Geologist and active in the field of primatology                                                | Dutch Gorilla Foundation                                                  | Netherlands (the)                                          |
| Visserman, Mariko Lisa    | Postdoctoral fellow in social psychology                                                               | University of Toronto                                                     | Canada                                                     |
| Vitalis, Tania            | Associate professor ; CR1                                                                              | INSERM                                                                    | France                                                     |

|                            |                                                                            |                                                                                                                              |                                                            |
|----------------------------|----------------------------------------------------------------------------|------------------------------------------------------------------------------------------------------------------------------|------------------------------------------------------------|
| Vitense, Kelsey            | Quantitative Ecologist                                                     |                                                                                                                              | United States of America (the)                             |
| Vitikainen, Emma           | Adjunct Professor (docent), Ecology and Evolutionary biology               | University of Helsinki                                                                                                       | Finland                                                    |
| Vitoraki, Maria            | Adjunct Professor Environmental Studies                                    | American College of Greece                                                                                                   | Greece                                                     |
| Vitorino Jr, Oscar         | Biologist                                                                  | Instituto Natureza do Tocantins                                                                                              | Brazil                                                     |
| Vitt, Laurie               | Curator/Professor Emeritus, ecology and evolution                          | Sam Noble Museum/University of Oklahoma                                                                                      | United States of America (the)                             |
| Vitule, Jean               | Ecology                                                                    | Federal University of Parana                                                                                                 | Brazil                                                     |
| Vivas, Maria               | Postdoctoral Fellow                                                        | University of Extremadura                                                                                                    | Spain                                                      |
| Vives, Stephen             | Professor of Biology                                                       | Georgia Southern University                                                                                                  | United States of America (the)                             |
| Vives-Inglà, Maria         | PhD student                                                                | Universitat Autònoma de Barcelona                                                                                            | Spain                                                      |
| Viviani, Pia               | Director, Science Communication and Citizen Science                        | catta gmbh                                                                                                                   | Switzerland                                                |
| Vizentin-Bugoni, Jeferson  | Postdoctoral researcher                                                    | University of Illinois at Urbana-Champaign                                                                                   | United States of America (the)                             |
| Vizina, Yvonne             | Assistant Professor, Indigenous Education                                  | University of Winnipeg                                                                                                       | Canada                                                     |
| Vizzini, Alfredo           | Mycology                                                                   | University of Torino, Dipartimento di Scienze della Vita e Biologia dei Sistemi                                              | Italy                                                      |
| Vlasiuk, Anastasiia        | Predoctoral fellow / Computational Neuroscience                            | European Molecular Biology Laboratory, Rome                                                                                  | Italy                                                      |
| Voedts, Henri              | PhD student - Microbiology                                                 | Sorbonne Université                                                                                                          | France                                                     |
| Voegel, Tanja              | Research Associate Biology                                                 | UBC Okanagan                                                                                                                 | Canada                                                     |
| Voelker, Bettina           | Professor of Chemistry                                                     | Colorado School of Mines                                                                                                     | United States of America (the)                             |
| Vogel, Yan B.              | PhD, Chemistry                                                             | Curtin University                                                                                                            | Australia                                                  |
| Vogel, Kristine            | Neuroscience                                                               | UT Health San Antonio                                                                                                        | United States of America (the)                             |
| Vogel, Manuel              | Professor fuer Neues Testament                                             | Friedrich Schiller Universitaet Jena                                                                                         | Germany                                                    |
| Vogg, Gerd                 | Curator Botanical Garden                                                   | Botanical Garden University Wuerzburg                                                                                        | Germany                                                    |
| Voigt, Karsten             | Senior Scientist, Bioinformatics of Marine Cyanobacteria                   | University of Freiburg                                                                                                       | Germany                                                    |
| Voigt, Kerstin             | Marine Biology                                                             |                                                                                                                              | United Kingdom of Great Britain and Northern Ireland (the) |
| Voigt, Holm                | Senior Scientist                                                           | Center for Development Research, University of Bonn                                                                          | Germany                                                    |
| Voigtländer, Jens          | Atmospheric Scientist                                                      |                                                                                                                              | Germany                                                    |
| Voinov, Alexey             | Distinguished professor                                                    | UTS                                                                                                                          | Australia                                                  |
| Voisin, Didier             | Professor of Atmospheric Chemistry                                         | University Grenoble Alpes                                                                                                    | France                                                     |
| Vojík, Martin              | PhD student of applied ecology                                             | Institute of Botany, Czech Academy of Sciences & Faculty of Environmental Sciences, Czech University of Life Sciences Prague | Czech Republic (the)                                       |
| Volckaert, Filip           | Professor Biology                                                          | KU Leuven                                                                                                                    | Belgium                                                    |
| Volkmer, Tamara            | PhD candidate                                                              | Max Planck Institute for Animal Behavior                                                                                     | Germany                                                    |
| Volkov, Ivan               |                                                                            | Uppsala University                                                                                                           | Sweden                                                     |
| Volkova-Volkmar, Ekaterina | Senior Data Scientist                                                      |                                                                                                                              | Switzerland                                                |
| Vollmer, Waldemar          | Professor of Bacterial Biochemistry                                        | Newcastle University                                                                                                         | United Kingdom of Great Britain and Northern Ireland (the) |
| Vollmer, Sarah             | PhD candidate; MSc Modeling + Computational Science; B.Engineering Physics | York Univeristy                                                                                                              | Canada                                                     |

|                            |                                                          |                                                                     |                                                            |
|----------------------------|----------------------------------------------------------|---------------------------------------------------------------------|------------------------------------------------------------|
| Volovitch, Michel          | Pr in molecular genetics                                 | Ecole Normale Supérieure                                            | France                                                     |
| Volponi, Marco             | Environmental Closed Life Support Systems                | European Space Agency                                               | Netherlands (the)                                          |
| von Arx, Georg             | Researcher                                               | Swiss Federal Research Institute WSL                                | Switzerland                                                |
| von Below, Jonathan        | Scholarship / Forest engineer - PhD Agricultural Science | CONICET - Institute of Subtropical Biology                          | Argentina                                                  |
| von Bergh, Dennis          | Dr.                                                      | Open University Netherlands                                         | Netherlands (the)                                          |
| von Dassow, Peter          | Associate Professor, Biological Oceanography             | Pontificia Universidad Católica de Chile                            | Chile                                                      |
| von Delft, Frank           | Professor, Structural Chemical Biology                   | University of Oxford                                                | United Kingdom of Great Britain and Northern Ireland (the) |
| von gillhausen, philipp    | PhD - Plant scientist                                    | IBG-2 Forschungszentrum Jülich                                      | Germany                                                    |
| Von Hagen, Lynn            | Conservation Biologist                                   |                                                                     | United States of America (the)                             |
| von Hagke, Christoph       | Geology                                                  | RWTH Aachen University                                              | Germany                                                    |
| Von Heideman, Anne         | MD, PhD, senior consultant                               | Uppsala University                                                  | Sweden                                                     |
| von Hessberg, Andreas      | post-doc                                                 | department for disturbance ecology                                  | Germany                                                    |
| von Hippel, Barbara        | Biochemistry                                             | Martin-Luther-University Halle-Wittenberg                           | Germany                                                    |
| von Lilienfeld-Toal, Marie | Medicine                                                 |                                                                     | Germany                                                    |
| von Puttkamer, Beatrix     | Scientific Outreach                                      | Karlsruhe Institute of Technology                                   | Germany                                                    |
| von Rege, Inez             | Doctor                                                   | NHS                                                                 | United Kingdom of Great Britain and Northern Ireland (the) |
| von Reumont, Frederik      | Research assistant                                       | University of Cologne                                               | Germany                                                    |
| von Schmalensee, Menja     | Ecologist                                                | West Iceland Center of Nature Research                              | Iceland                                                    |
| von Schneidmesser, Dirk    | Research Associate                                       | Institute for Advanced Sustainability Studies                       | Germany                                                    |
| Vonk, Arie                 | Assistant Professor Benthic Ecology                      | University of Amsterdam                                             | Netherlands (the)                                          |
| Vonk Noordegraaf, Henco    | Policy Officer/ Senior Lecturer Applied Biology          | HAS University of Applied Sciences                                  | Netherlands (the)                                          |
| Vonthron, Simon            | Human geography, PhD candidate                           | French National Institute of Agricultural Research (INRA)           | France                                                     |
| Vorster, Juan              | Associate Professor, Crop Physiology                     | University of Pretoria                                              | South Africa                                               |
| Vos, Vincent Antoine       | MSc in Tropical Ecology                                  | Universidad Autónoma del Beni                                       | Bolivia (Plurinational State of)                           |
| Voss, Susan                | Achilles Professor of Engineering                        | Smith College                                                       | United States of America (the)                             |
| Voss, Rachel               | PhD Candidate                                            | University of California, Santa Cruz                                | United States of America (the)                             |
| Vosteen, Ilka              | Postdoc                                                  | Wageningen University & Research                                    | Netherlands (the)                                          |
| Voswinkel, Merik           | principle investigator                                   | Metamorph Research Institute                                        | Netherlands (the)                                          |
| Vouillamoz, Naomi          | Environmental Geophysics                                 | Seismo Earth AG                                                     | Switzerland                                                |
| VOUNSERBO, Emmanuel        | Enseignant/ chef Bureau Recherche et Documentation       | Ecole de Faune de Garoua/ Cameroun                                  | Cameroon                                                   |
| Vovides, Andrew            | Researcher                                               | Instituto de Ecología, A.C.                                         | Mexico                                                     |
| Vowles, Tage               | Ecologist, Ph.D.                                         | University of Gothenburg                                            | Sweden                                                     |
| voz, marianne              | Principal Investigator                                   | University of Liege                                                 | Belgium                                                    |
| Vredenburg, Myriel         | Physical Oceanographer                                   | Alfred Wegener Institute for Polar and Marine Research, Bremerhaven | Germany                                                    |
| Vreede, Jocelyne           | Assistant professor                                      | University of Amsterdam                                             | Netherlands (the)                                          |
| Vriend, Stefan             | PhD candidate in ecology and evolutionary biology        | Norwegian University of Science and Technology (NTNU)               | Norway                                                     |

|                            |                                                                 |                                                             |                                                            |
|----------------------------|-----------------------------------------------------------------|-------------------------------------------------------------|------------------------------------------------------------|
| Vriens, Eva                | PhD Candidate Sociology                                         | Utrecht University                                          | Netherlands (the)                                          |
| Vrijdaghs, Alexander       | Postdoc researcher evolutionary botany                          | KU Leuven                                                   | Belgium                                                    |
| VRIZ, Sophie               | Professor                                                       | University Paris Diderot                                    | France                                                     |
| Vu, Van                    | Director                                                        | NTT Hi-Tech Institute, Nguyen Tat Thanh University          | Viet Nam                                                   |
| Vuarin, Pauline            | Post-doctoral researcher                                        | CNRS-Université de Bourgogne Franche-Comté                  | France                                                     |
| Vuellers, Jutta            | Research Fellow                                                 | School of Earth and Environment, University of Leeds        | United Kingdom of Great Britain and Northern Ireland (the) |
| VUILLERMOZ-BELLOD, Mélissa | Chemical Engineer                                               | Irstea                                                      | France                                                     |
| Vulinec, Kevina            | Professor of Wildlife Ecology                                   | Delaware State University                                   | United States of America (the)                             |
| Vuorinen, Katariina        |                                                                 | Norwegian University of Science and Technology              | Norway                                                     |
| Vurnek, Maja               | Expert Associate - biologist/ecologist/ freshwater ecosystems   |                                                             | Croatia                                                    |
| W. Amorim, Felipe          | Professor of Ecology                                            | São Paulo State University                                  | Brazil                                                     |
| Waag, Anne-Sophie          | Doctoral student                                                | University of Mannheim                                      | Germany                                                    |
| Wachocki, Barbara          | Professor                                                       | Weber State University                                      | United States of America (the)                             |
| Wachowicz, Elwira          | PhD/physics                                                     | Institute of Experimental Physics, University of Wrocław    | Poland                                                     |
| Wachter, Bettina           | Scientist, Evolutionary Ecology                                 | Leibniz Institut for Zoo and Wildlife Research              | Germany                                                    |
| Wadee, Khurram             | Senior Lecturer                                                 | University of Exeter                                        | United Kingdom of Great Britain and Northern Ireland (the) |
| Wadee, Ahmer               | Professor of Nonlinear Mechanics                                | Imperial College London                                     | United Kingdom of Great Britain and Northern Ireland (the) |
| Wadgyrmar, Susana          | Assistant Professor, Biology                                    | Davidson College                                            | United States of America (the)                             |
| Wadhams, Peter             | Climate change research                                         | Cambridge University                                        | United Kingdom of Great Britain and Northern Ireland (the) |
| Wadsworth, Patricia        | Professor                                                       | university of Massachusetts                                 | United States of America (the)                             |
| Wadt, Willard              | Theoretical Chemist retired from Los Alamos National Laboratory | Los Alamos National Laboratory Foundation (Board Treasurer) | United States of America (the)                             |
| Waeber, Patrick            |                                                                 | ETH                                                         | Switzerland                                                |
| waelbroeck, claire         | climate scientist                                               | CNRS                                                        | France                                                     |
| Wagner, Jill               | Forest restoration                                              | Future Forests Nursery, LLC                                 | United States of America (the)                             |
| Wagner, Rabea              | PhD student - microbial infection biology                       | Spanish National Center for Biotechnology                   | Spain                                                      |
| Wagner, Jan                | Radio Astronomy                                                 | Max Planck Institute for Radio Astronomy                    | Germany                                                    |
| Wagstaff, Matthew          | Environmental Scientist                                         | University of British Columbia                              | Canada                                                     |
| Waheed, Shazia             | Marine biologist                                                |                                                             | Ireland                                                    |
| Wahren, Henrik             |                                                                 | Research Centre for Applied Alpine Ecology                  | Australia                                                  |
| Waichman, Andrea           | Full professor                                                  | Federal University of Amazonas                              | Brazil                                                     |
| Wainwright, Hayden         |                                                                 | Queen's University                                          | Canada                                                     |
| Wakelam, Valentine         | Astrophysicist                                                  | CNRS                                                        | France                                                     |
| Wal, Christina             | Ecosystem Services                                              | University of Edinburgh                                     | Germany                                                    |
| Walakira, John             | Senior Research Scientist: Fisheries and Aquaculture            | National Fisheries Resources Research Institute, NARO       | Uganda                                                     |
| Walczyńska, Aleksandra     | Researcher                                                      | Jagiellonian University, Faculty of Biology                 | Poland                                                     |

|                             |                                                              |                                                                                |                                                            |
|-----------------------------|--------------------------------------------------------------|--------------------------------------------------------------------------------|------------------------------------------------------------|
| Waldhardt, Rainer           | Prof. in Vegetation and Landscape Ecology                    | Justus Liebig University Giessen                                               | Germany                                                    |
| Waldmüller, Johannes        | Research Professor                                           | FLACSO Ecuador                                                                 | Ecuador                                                    |
| waldteufel, philippe        | senior scientist emeritus                                    | CNRS                                                                           | France                                                     |
| Walisser, Wayne             |                                                              | Retired                                                                        | United States of America (the)                             |
| Walker, Wayne               | Associate Scientist                                          | Woods Hole Research Center                                                     | United States of America (the)                             |
| Walker, Lawrence            | Professor Emeritus in Ecology                                | University of Nevada Las Vegas                                                 | United States of America (the)                             |
| Walker, Tony                | Assistant Professor                                          | Dalhousie University                                                           | Canada                                                     |
| Walker, Tracy               | District Biologist                                           | California Dept of Transportation                                              | United States of America (the)                             |
| Walker, Courteney           | MSc Student, Ecology                                         | University of Canterbury                                                       | New Zealand                                                |
| Walker, Alex W              | Physicist                                                    | National Research Council of Canada                                            | Canada                                                     |
| Walker, David               | MRSB CBIol, microbiology                                     | retired                                                                        | United Kingdom of Great Britain and Northern Ireland (the) |
| Wall, William               | Investigador                                                 | Instituto Nacional de Astrofísica, Óptica, y Electrónica                       | Mexico                                                     |
| Wallace, Richard            | Professor of Environmental Studies                           | Ursinus College                                                                | United States of America (the)                             |
| Wallace, Kiri Joy           | Restoration Ecologist                                        | University of Waikato                                                          | New Zealand                                                |
| Waller, William             | Regents Professor Emeritus                                   | University of North Texas                                                      | United States of America (the)                             |
| Waller, Don                 | Professor of Botany                                          | Univ of Wisconsin- Madison                                                     | United States of America (the)                             |
| Wallhagen, Marita           | Assisdtng Professor                                          | Univeristy of Gävle, Department of Building, Energy and Sustainability Science | Sweden                                                     |
| wallhead, Tristan           | Professor                                                    | University of Wyoming                                                          | United States of America (the)                             |
| Wallis De Vries, Michiel    | Special Professor Insect Ecology and Conservation            | Wageningen University & Research                                               | Netherlands (the)                                          |
| Wallner-Novak, Markus       | Civil Engineer                                               | FH JOANNEUM                                                                    | Austria                                                    |
| Walmsley, Sam               | Research Associate                                           | Harvard University                                                             | United States of America (the)                             |
| Walmsley, Clive             | Lead Specialist Advisor - Climate Change and Decarbonisation | Natural Resources Wales                                                        | United Kingdom of Great Britain and Northern Ireland (the) |
| Walsh, Daniel               | Biology and environmental science                            | UNLV                                                                           | United States of America (the)                             |
| Walsh, Seana                | Conservation Biologist                                       | National Tropical Botanical Garden                                             | United States of America (the)                             |
| Walsh, Jessica              | Master of Science                                            | University of Vienna                                                           | Austria                                                    |
| Walston, Joe                | Senior Vice President                                        | Wildlife Conservation Society                                                  | United States of America (the)                             |
| Walter, Monika              | Scientist, Plant Pathology                                   | The New Zealand Institute of Plant and Food Research Ltd                       | New Zealand                                                |
| Walter, Juline              | Postdoc / Marine Microbiology                                | Nord University                                                                | Norway                                                     |
| Walter, Bruno Machado Teles | Senior Researcher                                            | Embrapa Recursos Genéticos e Biotecnologia                                     | Brazil                                                     |
| Walter, David               | Postdoc                                                      | Max Planck Institute for Chemistry                                             | Germany                                                    |
| Walters, Bradley            | Professor of Geography & Environment                         | Mount Allison University                                                       | Canada                                                     |
| Walters, Shirley            | Professor Emerita Adult and Continuing Education             | University of the Western Cape                                                 | South Africa                                               |
| Waltert, Matthias           | Professor                                                    | University of Goettingen                                                       | Germany                                                    |
| Walton, Sara                | Associate Professor of Management                            | University of Otago                                                            | New Zealand                                                |
| Wanat, Marek                | Entomologist                                                 | Museum of Natural History, University of Wroclaw                               | Poland                                                     |
| Wanek, Wolfgang             | University Professor                                         | University of Vienna, Austria                                                  | Austria                                                    |
| Wang, Deane                 | Professor Natural Resources                                  | University of Vermont                                                          | United States of America (the)                             |

|                       |                                                        |                                                                           |                                                               |
|-----------------------|--------------------------------------------------------|---------------------------------------------------------------------------|---------------------------------------------------------------|
| Wang, Ying            | Professor                                              |                                                                           | United States of America (the)                                |
| Wang, Denis           | Retired, Marine Ecology                                | PhD University of Rhode Island                                            | United States of America (the)                                |
| Wang, Ying-Jie        | PhD student                                            | Ecology, Evolution and Biodiversity Conservation,<br>University of Leuven | Belgium                                                       |
| Warburton, Kevin      | Retired academic; Adjunct Research Fellow              | Charles Sturt University                                                  | Australia                                                     |
| Ward, Sheila          | Ecology                                                | Independent                                                               | Puerto Rico                                                   |
| Ward, Michael         | Scientist, Metrology                                   | NPL                                                                       | United Kingdom of Great Britain<br>and Northern Ireland (the) |
| Ward, Rebekah         | Associate Professor of Biology                         |                                                                           | United States of America (the)                                |
| Ward, Barbara J.      | PhD Student, Environmental Engineering                 | Eawag: Swiss Federal Institute for Aquatic Science and<br>Technology      | Switzerland                                                   |
| Ward, Delphi          | Ecologist                                              | University of Tasmania                                                    | Australia                                                     |
| Ward, Adam            | PhD Candidate - Epidemiology (Infectious Diseases)     | George Washington University                                              | United States of America (the)                                |
| Wardle, Rob           | Field Representative & Ecologist                       | QEII National Trust                                                       | New Zealand                                                   |
| Wardrop, Nick         | Electrical Engineer                                    | Sunergy Consulting                                                        | Australia                                                     |
| Ware, Jessica         |                                                        | Swansea University                                                        | United Kingdom of Great Britain<br>and Northern Ireland (the) |
| Waring, Bonnie        | Assistant Professor of Biology                         | Utah State University                                                     | United States of America (the)                                |
| Waring, Kristen       | Professor of Forestry                                  | Northern Arizona University                                               | United States of America (the)                                |
| Waring, Richard       | Emeritus Professor of Forest Ecosystems                | Oregon State University                                                   | United States of America (the)                                |
| Warne, Tony           | Senior Investigator Scientist, Structural Biology      | MRC Laboratory of Molecular Biology                                       | United Kingdom of Great Britain<br>and Northern Ireland (the) |
| Warner, John          | research scientist, entomology                         | University of Florida, FLREC                                              | United States of America (the)                                |
| Warner, Emily         | DPhil student Plant Sciences                           | University of Oxford                                                      | United Kingdom of Great Britain<br>and Northern Ireland (the) |
| Warners, David        | Professor of Biology                                   | Calvin University                                                         | United States of America (the)                                |
| Warsink, Stefan       | Lecturer Organic Chemistry                             | Leidn University of Applied Sciences                                      | Netherlands (the)                                             |
| Wascher, Claudia      | Senior Lecturer                                        | Anglia Ruskin University                                                  | United Kingdom of Great Britain<br>and Northern Ireland (the) |
| Waser, Nickolas       | Professor of Biology/Ecologist                         | University of California                                                  | United States of America (the)                                |
| Washington, David     | Internal Medicine and Pediatrics                       | Houston Methodist                                                         | United States of America (the)                                |
| Washington, Haydn     | University of New South Wales, Australia               | PANGAEA Research Centre                                                   | Australia                                                     |
| Wasserman, Michael    | Assistant Professor of Anthropology & Human<br>Biology | Indiana University                                                        | United States of America (the)                                |
| Wasserman, Ryan       | Aquatic Ecology                                        | Botswana International University of Science and<br>Technology            | Botswana                                                      |
| Wassmer, Thomas       | Associate Professor of Biology                         | Siena Heights University                                                  | United States of America (the)                                |
| Wasson, Michael       | Economist, Mathematician                               |                                                                           | United States of America (the)                                |
| Waterhouse, Robert    | Assistant Professor                                    | University of Lausanne                                                    | Switzerland                                                   |
| Watermeyer, Kate      | Postdoctoral fellow                                    | Deakin University                                                         | Australia                                                     |
| Waters, Jonathan      | Professor of Zoology                                   | University of Otago                                                       | New Zealand                                                   |
| Waterschoot, Béranger | Teaching Assistant / PhD Student                       | UCLouvain                                                                 | Belgium                                                       |

|                      |                                                     |                                                          |                                                            |
|----------------------|-----------------------------------------------------|----------------------------------------------------------|------------------------------------------------------------|
| Watkins, Nicholas    | Senior Lecturer                                     | Newcastle University                                     | United Kingdom of Great Britain and Northern Ireland (the) |
| Watkins, Nancy       | Neuroscientist and writer                           |                                                          | United States of America (the)                             |
| WATSON, JOHN         | BOTANIST                                            | RETIRED                                                  | Chile                                                      |
| Watts, David         | Professor, Anthropology                             | Yale University                                          | United States of America (the)                             |
| Watts, David         | Postdoctoral Researcher, Ecology                    | Université de Sherbrooke                                 | Canada                                                     |
| Watts, Robyn         | Professor of Environmental Science                  | Charles Sturt University                                 | Australia                                                  |
| Watts, Sophie        | PhD Student                                         | University of British Columbia                           | Canada                                                     |
| Waugh, Rani          | Medical Laboratory Scientist/ Immunohematology      |                                                          | United States of America (the)                             |
| Waugh, Nathan        | Research Fellow, Biochemistry and Biophysics        | Oregon State University                                  | United States of America (the)                             |
| Waye, Heather        | Associate Professor of Biology                      | University of Minnesota Morris                           | United States of America (the)                             |
| Weako, Jackson       | PhD. Student                                        | Koç University                                           | Turkey                                                     |
| Weatherhead, Richard | Bachelor of Science                                 | Northern Territory University                            | Australia                                                  |
| Webb, Steve          | Professor, Palaeoclimatology/Palaeoanthropology     | Bond University                                          | Australia                                                  |
| Webb, Arthur         | Coastal Science - Tropical Pacific Islands          | University of Wollongong                                 | Kiribati                                                   |
| Webber, Tom          | Ornithologist                                       | Florida Museum of Natural History, University of Florida | United States of America (the)                             |
| Weber, Eliseu        | Adjunct Professor                                   | Universidade Federal do Rio Grande do Sul                | Brazil                                                     |
| Weber, Eicke         | Prof. Emer.                                         | Univ of California, Berkeley                             | United States of America (the)                             |
| Weber, Urban         | Professor of Physics and Applied Materials Sciences | University of Applied Sciences, Bingen, Germany          | Germany                                                    |
| Weber, Manuel        | Research scientist                                  | El colegio de la Frontera Sur-ECOSUR                     | Mexico                                                     |
| Weber, Nicola        | Lecturer in Biosciences                             | University of Exeter                                     | United Kingdom of Great Britain and Northern Ireland (the) |
| Weber, Marc          | Geographer                                          |                                                          | United States of America (the)                             |
| Weber, Donald        | Research Entomologist                               | Agricultural Research Service                            | United States of America (the)                             |
| Weber, Erwan         | Scientist                                           | OAB                                                      | Sweden                                                     |
| Weber, Axelle        | PhD student                                         | Bordeaux INP                                             | France                                                     |
| Weber, Tony          | National Lead - Water Modelling                     | Alluvium Consulting Australia                            | Australia                                                  |
| Weber, Johannes      | wiss. Mitarbeiter Dept. Anorganische Materialchemie | Universität Siegen                                       | Germany                                                    |
| Weber, Natalie       | Independent Research Scientist (bats)               | Independent Research Consultancy                         | Germany                                                    |
| WEBER, Christiane    | research scientist                                  | CNRS                                                     | France                                                     |
| Webster, Nicole      | Principal Research Fellow                           | University of Queensland                                 | Australia                                                  |
| Webster, Michael     | Robert G. Engel Professor of Ornithology            | Cornell University                                       | United States of America (the)                             |
| Wedi, Marcel         | Phd Student                                         | Max-Planck-Institute for Dynamics and Self-Organization  | Germany                                                    |
| Weedon, Christopher  | Waste Water Consultant/Biochemistry                 | Watercourse Systems Ltd                                  | United Kingdom of Great Britain and Northern Ireland (the) |
| Weeks, Stephen       | Professor of Biology                                | The University of Akron                                  | United States of America (the)                             |
| Weeks, Deseret       | Environmental Geographer                            | UC Merced                                                | United States of America (the)                             |
| Wegener, Christian   | Professor of Neurogenetics                          | Biocenter, University of Würzburg                        | Germany                                                    |
| Wegner, Fanny        | Evolutionary Microbiologist                         | Institut Pasteur Paris                                   | France                                                     |
| Wehenkel, Anne Marie | Researcher                                          | Institut Pasteur                                         | France                                                     |

|                          |                                                                                   |                                                                                    |                                                            |
|--------------------------|-----------------------------------------------------------------------------------|------------------------------------------------------------------------------------|------------------------------------------------------------|
| Wehi, Priscilla          | Conservation Biologist                                                            | Manaaki Whenua Landcare Research                                                   | New Zealand                                                |
| WEHINGER, SERGIO         | PROFESSOR                                                                         | UNIVERSIDAD DE TALCA                                                               | Chile                                                      |
| Wehmanen, Oscar          | Mathematician                                                                     | Kelsey Research Foundation (Ret.)                                                  | United States of America (the)                             |
| Weidenhausen, Jonas      | PhD student, biochemistry                                                         | Biochemistry Center, Heidelberg                                                    | Germany                                                    |
| Weidlich, Emanuela W. A. | Postdoc                                                                           | Universidade Federal de Santa Catarina                                             | Brazil                                                     |
| Weigand, Alexander       | Zoology Curator                                                                   | Musée National d'Histoire Naturelle                                                | Luxembourg                                                 |
| Weigelt, Patrick         | Senior Scientist in Macroecology and Biogeography                                 | University of Göttingen                                                            | Germany                                                    |
| Weil, Ernesto            | Professor/researcher in Marine Sciences                                           | University of Puerto Rico                                                          | United States of America (the)                             |
| Weill, Sylvain           | Assistant Professor                                                               | National School for Water and Environmental Engineering - University of Strasbourg | France                                                     |
| Weiner, Agnes            | Postdoctoral Researcher, Ecology and Evolution                                    | Smith College                                                                      | United States of America (the)                             |
| Weinert, Lucy            | Henry Dale Fellow in Veterinary Medicine                                          | University of Cambridge                                                            | United Kingdom of Great Britain and Northern Ireland (the) |
| Weingart, Jerome         | retired physicist                                                                 | UC Berkeley, LBNL                                                                  | United States of America (the)                             |
| Weinreb-Willard, Mathieu | Bio-engineer                                                                      |                                                                                    | Belgium                                                    |
| Weinstein, David         | Post Doctoral researcher/ Marine Geology                                          | Interuniversity Institute for Marine Sciences in Eilat                             | United States of America (the)                             |
| Weinzettel, Jan          | Researcher                                                                        | Charles University                                                                 | Czech Republic (the)                                       |
| Weir, Bevan              | Mycology                                                                          | Manaaki Whenua                                                                     | New Zealand                                                |
| Weis, Judith             | Professor Emerita Biological Sciences                                             | Rutgers University                                                                 | United States of America (the)                             |
| Weishampel, Peter        | Ecology; Manager of Field Sciences                                                | National Ecological Observatory Network                                            | United States of America (the)                             |
| Weisiger, Richard        | Emeritus Professor of Medicine                                                    | University of California, San Francisco                                            | United States of America (the)                             |
| Weiss, Shahaf            | PhD - Neuroscience                                                                | Max-Planck                                                                         | Germany                                                    |
| Weiss, Harold            | Epidemiology                                                                      | University of Wisconsin                                                            | United States of America (the)                             |
| Weiss, Anna              | Climate Resilience Post-Doctoral Research Fellow                                  | University of Belize Environmental Research Institute                              | Belize                                                     |
| Weissgerber, Alexander   | M.D.                                                                              | Leipzig Heart Centre Herzzentrum, Germany                                          | Germany                                                    |
| Weißhuhn, Peter          | Researcher in Landscape Ecology                                                   | Leibniz Centre for Agricultural Landscape Research (ZALF)                          | Germany                                                    |
| Weitz, Nora              | Adjunct Instructor                                                                | Calhoun Community College                                                          | United States of America (the)                             |
| Welch, Andreanna         | Assistant Professor (Research) in Ecology, Evolution & the Environment            | Durham University                                                                  | United Kingdom of Great Britain and Northern Ireland (the) |
| Weldon, Elise            | Courtesy Research Assistant, Earth Sciences                                       | University of Oregon                                                               | United States of America (the)                             |
| Weldrick, Christine      | Support team member for Marine Ecosystem Assessment of the Southern Ocean (MEASO) | Institute for Marine & Antarctic                                                   | Australia                                                  |
| Welford, Alex            | Conservation                                                                      |                                                                                    | United Kingdom of Great Britain and Northern Ireland (the) |
| Weller, Florian          | Postdoctoral Researcher in Ecology                                                | CAFNR, University of Missouri                                                      | United States of America (the)                             |
| Wells, Jennifer          | Biochemist                                                                        | LMU Munich, Max Planck Graduate School                                             | Germany                                                    |
| Wells, Isabelle          | Bioinformatician                                                                  | Roche                                                                              | Switzerland                                                |
| Wells, Alice             | Entomology                                                                        | [retired]                                                                          | Australia                                                  |
| Wells, Konstans          | Lecturer (Research) in Bioscience                                                 | Swansea University                                                                 | United Kingdom of Great Britain and Northern Ireland (the) |
| Wells, Peter             | Senior Research Fellow and Adjunct Professor                                      | Dalhousie University                                                               | Canada                                                     |

|                           |                                                                      |                                                    |                                                            |
|---------------------------|----------------------------------------------------------------------|----------------------------------------------------|------------------------------------------------------------|
| Wells, Jeffrey            | Vice President of Boreal Conservation                                | National Audubon Society                           | United States of America (the)                             |
| Welsh III, Dr. William O. | Global Resilience, Sustainability, Thriving Lifeway, Deep Adaptation |                                                    | United States of America (the)                             |
| Welton, Luke              | Evolutionary Biology                                                 |                                                    | United States of America (the)                             |
| Wemelsfelder, Françoise   | Professor of animal behaviour and welfare                            | Scotland's Rural College                           | United Kingdom of Great Britain and Northern Ireland (the) |
| Wendling, Valentin        | Hydrologist - Postdoctoral researcher                                | Institut de recherche pour le développement        | France                                                     |
| Wendt, Anja               | Research Scientist, Geodesy                                          | Bavarian Academy of Sciences and Humanities        | Germany                                                    |
| Wennekes, Paul            | PhD Biology                                                          | University of Reading                              | United Kingdom of Great Britain and Northern Ireland (the) |
| Wenninger, Jochen         | Associate Professor of Hydrology & Water Resources                   | IHE Delft Institute for Water Education            | Netherlands (the)                                          |
| Wenny, Daniel             | Landbird Senior Biologist                                            | SFBBO                                              | United States of America (the)                             |
| Went, Marjorie            | Chemical Engineering                                                 | UC Berkeley                                        | United States of America (the)                             |
| Wenzel, John              | Entomologist                                                         | Carnegie Museum of Natural History                 | United States of America (the)                             |
| Werkman, Harko            | College of Science and Engineering                                   | University of Tasmania                             | Australia                                                  |
| Werne, Josef              | Professor, Dept. of Geology & Environmental Science                  | University of Pittsburgh                           | United States of America (the)                             |
| Werneck, Fernanda         | Researcher - Biodiversity scientist                                  | Instituto Nacional de Pesquisas da Amazônia (INPA) | Brazil                                                     |
| Werner, Inge              | Director                                                             | Swiss Centre for Applied Ecotoxicology             | Switzerland                                                |
| Werner, Dr. Jeffery       | Wildlife Ecologist                                                   | BC Government                                      | Canada                                                     |
| Werner, Christiane        | Professor of Ecosystem Physiology                                    | University of Freiburg                             | Germany                                                    |
| Werpachowska, Agnieszka   | CEO of a research company, applied statistics                        | Averisera Ltd                                      | United Kingdom of Great Britain and Northern Ireland (the) |
| Werpachowski, Roman       | Research Engineer                                                    | DeepMind                                           | United Kingdom of Great Britain and Northern Ireland (the) |
| Wertheim, Heiman          | Professor                                                            | Radboud university                                 | Netherlands (the)                                          |
| Weslawski, Jan Marcin     | director of the institute, professor, marine biology                 | Institute of Oceanology Polish Academy of Sciences | Poland                                                     |
| Wesołowska, Wanda         | professor/biology                                                    | Wrocław University                                 | Poland                                                     |
| Wesołowski, Tomasz        | professor/biology                                                    | Laboratory of Forest Biology, Wrocław University   | Poland                                                     |
| Wessel, Jason             | PhD candidate                                                        | Griffith University                                | Australia                                                  |
| Wesselingh, Renate        | Professor in evolutionary ecology                                    | UCLouvain                                          | Belgium                                                    |
| Wessely, Johannes         | Post doc                                                             | university of Vienna                               | Austria                                                    |
| West, Morris              | Cellular and Molecular Biology                                       | Stony Brook University                             | United States of America (the)                             |
| West, Carol               | Honorary Research Associate                                          | Department of Conservation                         | New Zealand                                                |
| Westcott, Daniel          | PhD student Plant Biology                                            | UC Berkeley                                        | United States of America (the)                             |
| Westermann, Fabian        | Senior Tutor and Lecturer in Ecology                                 | Victoria University of Wellington                  | New Zealand                                                |
| Western, Catherine        | Doctor                                                               | Derriford Hospital, Plymouth                       | United Kingdom of Great Britain and Northern Ireland (the) |
| Westerweel, Jan           | PhD student                                                          | University of Rennes 1 (CNRS)                      | France                                                     |
| Westphal, Catrin          | Functional Agrobiodiversity                                          | University of Göttingen                            | Germany                                                    |
| Westphal, Michael         | global environmental change, conservation biology                    | World Resources Institute                          | United States of America (the)                             |
| Westram, Anja             | Postdoc                                                              | IST Austria                                        | Austria                                                    |
| Westwood, Jennifer        | Medical Research                                                     | Retired                                            | Australia                                                  |

|                     |                                                                         |                                                               |                                                            |
|---------------------|-------------------------------------------------------------------------|---------------------------------------------------------------|------------------------------------------------------------|
| Wetherhill, Anthony | Field Ornithologist                                                     | RSPB                                                          | United Kingdom of Great Britain and Northern Ireland (the) |
| Wex, Heike          | Senior Scientist / Research on atmospheric Aerosol-Cloud-Interaction    | Leibniz Institute for Tropospheric Research                   | Germany                                                    |
| Wexler, Anthony     | Distinguished Professor and Director of the Air Quality Research Center | University of California, Davis                               | United States of America (the)                             |
| Weyhenmeyer, Gesa   | Professor of Aquatic Biogeochemistry                                    | Uppsala University                                            | Sweden                                                     |
| Weymann, Ray        | Director Emeritus, Carnegie Observatories                               | Carnegie Institution for Science; member Nat. Acad. Science   | United States of America (the)                             |
| Wheatley, Rebecca   | Postdoctoral Research Fellow in Ecology                                 | University of Tasmania                                        | Australia                                                  |
| Wheeler, John       | Professor                                                               | University of Wisconsin-River Falls                           | United States of America (the)                             |
| Wheeler, Dr. Ichsan | Researcher, Farming Systems Ecology                                     | Wageningen University Research                                | Netherlands (the)                                          |
| Whelan, Conor       | Technical Officer                                                       | University College Dublin                                     | Ireland                                                    |
| Whelan, Christopher | Adjunct Research Associate Professor                                    | University of Illinois at Chicago                             | United States of America (the)                             |
| WHELAN, GARY        | Fisheries Program Manager                                               | MI DNR Fisheries Division                                     | United States of America (the)                             |
| Whisson, Desley     | Wildlife Biologist                                                      | Deakin University                                             | Australia                                                  |
| Whitacre, David     | Ecologist                                                               | Treasure Valley Math and Science Center                       | United States of America (the)                             |
| Whitaker, Stephen   | Marine Ecologist                                                        |                                                               | United States of America (the)                             |
| Whitaker, Michael   | Emeritus Professor of Physiology                                        | Newcastle University                                          | United Kingdom of Great Britain and Northern Ireland (the) |
| White, Sarah        | Medical Doctor (GP Registrar)                                           | Leicester GPVTS                                               | United Kingdom of Great Britain and Northern Ireland (the) |
| White, Brian        | Professor emeritus of Geosciences                                       | Smith College                                                 | United States of America (the)                             |
| White, Thomas       | Biochemistry                                                            | University of California, Berkeley                            | United States of America (the)                             |
| White, Denis        | retired geographer                                                      | US EPA, Oregon State University courtesy faculty              | United States of America (the)                             |
| White, Joël         | Assistant professor in Ecology                                          | EDB lab, University of Toulouse                               | France                                                     |
| White, Jacob        | Research Fellow, Astrophysics                                           | Konkoly Observatory                                           | Hungary                                                    |
| White, Sarah        | SARAO Postdoctoral Fellow (Astrophysics)                                | Rhodes University                                             | South Africa                                               |
| White, John         | Associate Professor in wildlife ecology                                 | Deakin University                                             | Australia                                                  |
| White, Bryan        | Biologist                                                               | Institute for Integrative Research in Earth and Space Science | United States of America (the)                             |
| White III, Richard  | Microbiology                                                            | Washington State University                                   | United States of America (the)                             |
| Whitecross, Melissa | Conservation Scientist                                                  | BirdLife South Africa                                         | South Africa                                               |
| whitehead, brandon  | data scientist   geoscience                                             | CABI                                                          | United Kingdom of Great Britain and Northern Ireland (the) |
| Whitehouse, Peter   | Professor Neurology and neuroscience                                    | Case Western Reserve University                               | United States of America (the)                             |
| Whiting, Martin J.  | Associate Professor, Biological Sciences                                | Macquarie University                                          | Australia                                                  |
| Whitlock, Dani      | PhD Researcher                                                          | Edinburgh Napier                                              | United Kingdom of Great Britain and Northern Ireland (the) |
| Whitney, Charlotte  | PhD Candidate, Environmental Studies                                    | University of Victoria                                        | Canada                                                     |
| Whitson, Jeremy     | Senior Fellow                                                           | University of Washington                                      | United States of America (the)                             |

|                             |                                                       |                                                                              |                                                            |
|-----------------------------|-------------------------------------------------------|------------------------------------------------------------------------------|------------------------------------------------------------|
| Whittaker, Benjamin         | PhD in Aquaculture                                    | Swansea University                                                           | United Kingdom of Great Britain and Northern Ireland (the) |
| Whitten, Miranda            | Senior Lecturer                                       | Swansea University                                                           | United Kingdom of Great Britain and Northern Ireland (the) |
| Whyte, Callum               | Biological Oceanographer                              | Scottish Association for marine Science                                      | United Kingdom of Great Britain and Northern Ireland (the) |
| Wich, Serge                 | Professor in Primate Biology                          |                                                                              | United Kingdom of Great Britain and Northern Ireland (the) |
| Wicker, Rebecca             | PhD Candidate, Environmental Biotechnology            | University of Eastern Finland                                                | Finland                                                    |
| Wicker-Planquart, Catherine | Researcher in Biochemistry                            | IBS-Grenoble                                                                 | France                                                     |
| Wickliffe, Jeffrey          | Associate Professor of Environmental Health Sciences  | Tulane University                                                            | United States of America (the)                             |
| Wicks, Stephen              | Principal Data Scientist                              | Clarivate Analytics, LLC                                                     | United States of America (the)                             |
| Widdig, Anja                | Professor of Behavioural Ecology                      | University of Leipzig and Max-Planck Institute for Evolutionary Anthropology | Germany                                                    |
| Wieczorek, Alina Madita     | PhD student                                           | NUI Galway                                                                   | Ireland                                                    |
| Wieczorek, Helmut           | Professor of Animal Physiology                        | University of Osnabruck                                                      | Germany                                                    |
| Wiedermannova, Jana         | Research associate in molecular biology               | Institute for Cell & Molecular Biosciences, Newcastle University             | United Kingdom of Great Britain and Northern Ireland (the) |
| Wiedmann, Tommy             | Associate Professor of Sustainability Research        | UNSW Sydney                                                                  | Australia                                                  |
| Wiegand, Kerstin            | Professor / Ecology                                   | University of Göttingen                                                      | Germany                                                    |
| Wielinski, Jonas            | PhD Student Environmental Engineering                 | ETH Zürich                                                                   | Switzerland                                                |
| Wielstra, Ben               | Assistant Professor                                   | Institute of Biology Leiden, Leiden University                               | Netherlands (the)                                          |
| Wiemers, Martin             | Head of Ecology                                       | Senckenberg Deutsches Entomologisches Institut Münchenberg                   | Germany                                                    |
| Wiencke, Lawrence           | Professor of Physics                                  | Colorado School of Mines                                                     | United States of America (the)                             |
| Wienecke, Barbara           | Ecologist                                             |                                                                              | Australia                                                  |
| Wieners, Claudia            | Postdoc Climate Economics                             | Scuola Superiore Sant'Anna                                                   | Italy                                                      |
| Wienk, Raven                | MSc student (Microbiology)                            | University of Pretoria                                                       | South Africa                                               |
| Wienkoop, Stefanie          | Associate Professor                                   | University of Vienna                                                         | Austria                                                    |
| Wierenga, Eddy              | Assistant professor                                   | Amsterdam University Medical Centres                                         | Netherlands (the)                                          |
| Wiesner, Rudolf             | Professor                                             | Center of Physiology and Pathophysiology                                     | Germany                                                    |
| Wiessing, Lucas             | Principal scientist                                   | European Monitoring Centre for Drugs and Drug Addiction (EMCDDA)             | Portugal                                                   |
| Wigge, Philip               | Professor and Head of Department for Plant Adaptation | University of Potsdam and Leibniz IGZ                                        | Germany                                                    |
| Wignall, Veronica           | Doctoral researcher in insect foraging ecology        | University of Sussex                                                         | United Kingdom of Great Britain and Northern Ireland (the) |
| Wiklund, Christer           | Dr Evolutionary Ecology                               |                                                                              | Sweden                                                     |
| Wiklund, Christer G         | PhD Evolutionary Ecology                              | Department of Ecology, Swedish University of Agricultural Sciences           | Sweden                                                     |
| Wilce, Matthew              | Professor of Biochemistry                             | Monash University                                                            | Australia                                                  |
| Wilde, Danielle             | Associate Professor –Design                           | University of Southern Denmark                                               | Denmark                                                    |
| Wilde, Kerstin              | Political Economics - PhD candidate                   | www.iamo.de                                                                  | Germany                                                    |

|                        |                                                                          |                                                                                       |                                                            |
|------------------------|--------------------------------------------------------------------------|---------------------------------------------------------------------------------------|------------------------------------------------------------|
| Wilhelm, Micah         | Climate science                                                          | Swiss Federal Institute for Forest, Snow and Landscape                                | Switzerland                                                |
| Wilkening, Jennnifer   | Research Ecologist                                                       | FWS                                                                                   | United States of America (the)                             |
| Wilkie, Martin         | Conservation Biologist in Wildlife Conservation and Ecosystem Management | Marwell Wildlife, UK                                                                  | United Kingdom of Great Britain and Northern Ireland (the) |
| Wilkins, Daniel        | Environmental Scientist                                                  |                                                                                       | Australia                                                  |
| Wilkins, Peter         | Plant Breeding                                                           |                                                                                       | United Kingdom of Great Britain and Northern Ireland (the) |
| Wilkinson, Stephen     | Associate Professor in Engineering Geology                               | University of Wollongong in Dubai                                                     | United Arab Emirates (the)                                 |
| Willberg, Elias        | PhD candidate / Geography                                                | University of Helsinki                                                                | Finland                                                    |
| Willemen, Louise       | Associate prof                                                           | University of Twente                                                                  | Netherlands (the)                                          |
| Willet, Walter         | Professor of Epidemiology and Public Health                              | Harvard. T.H. Chan School of Public Health                                            | United States of America (the)                             |
| William, Frederick     | Research Curator                                                         | Fragile Inheritance Natural History                                                   | Canada                                                     |
| Williams, Aaron        | PhD Candidate - Power, Energy and Systems                                | University of Glasgow                                                                 | United Kingdom of Great Britain and Northern Ireland (the) |
| Williams, Timothy      | Microbiology                                                             | UNSW                                                                                  | Australia                                                  |
| Williams, Caroline     | Assistant Professor of Integrative Biology                               | University of California, Berkeley                                                    | United States of America (the)                             |
| Williams, Ramon        | Master' s of Natural Resources Management student                        | University of Manitoba                                                                | Canada                                                     |
| Williams, Norris       | botamy                                                                   | FLMNH                                                                                 | United States of America (the)                             |
| Williams, Patricia     | Statistician                                                             | Tricia Williams                                                                       | United Kingdom of Great Britain and Northern Ireland (the) |
| Williams, Robert       | Estuarine ecologist                                                      | New South Wales Fisheries (retired)                                                   | Australia                                                  |
| Williams, Mark         | Professor of Cognitive Neuroscience                                      | Macquarie University                                                                  | Australia                                                  |
| Williams, Murray       | Conservation biologist and ecologist (retired)                           | Formerly New Zealand Department of Conservation and Victoria University of Wellington | New Zealand                                                |
| Williams, Rosie        | Postgraduate researcher                                                  | Zoological Society of London                                                          | United Kingdom of Great Britain and Northern Ireland (the) |
| Williams, Paris        | Psychologist                                                             |                                                                                       | New Zealand                                                |
| Williams, Jack         | Emeritus Senior Scientist                                                | Trout Unlimited                                                                       | United States of America (the)                             |
| Williams, Lynda        | Physics Faculty                                                          | Santa Rosa Junior College                                                             | United States of America (the)                             |
| Williams, Barbara      | Retired software developer                                               | B Sc in Maths & Physics from Hebrew University in 1979 maiden name Gush               | United Kingdom of Great Britain and Northern Ireland (the) |
| Williams, Emma         | Clinical Biochemist                                                      | Imperial College Healthcare NHS Trust                                                 | United Kingdom of Great Britain and Northern Ireland (the) |
| Williams, Christopher  | Senior lecturer School of Biological and Environmental Sciences          | Liverpool John Moores University                                                      | United Kingdom of Great Britain and Northern Ireland (the) |
| Williams, Sam          | Postdoctoral Research Fellow in conservation biology                     | University of Venda                                                                   | South Africa                                               |
| Williams, Howard       | Geoscientist                                                             | Brock                                                                                 | Canada                                                     |
| Williams, John G       | Physical and biological geography                                        | retired                                                                               | United States of America (the)                             |
| Williamson, Dr. Dennis | Director                                                                 | Geoscene International (A Division of Scenic Spectrums Pty Ltd                        | Australia                                                  |
| Williamson, Phillip    | Honorary Reader                                                          | University of East Anglia                                                             | United Kingdom of Great Britain and Northern Ireland (the) |
| Williamson, Sean       | Postdoctoral Scientist                                                   | Monash University                                                                     | Australia                                                  |

|                           |                                                                     |                                                                                  |                                                            |
|---------------------------|---------------------------------------------------------------------|----------------------------------------------------------------------------------|------------------------------------------------------------|
| Williamson, Michelle      | Science Support Biological Sciences                                 | ESR                                                                              | New Zealand                                                |
| Williamson, Michael       | PhD candidate                                                       | King's College London / Institute of Zoology                                     | United Kingdom of Great Britain and Northern Ireland (the) |
| Williamson, Brian         | Research Specialist, Aquatic Ecology                                | University of California, Davis                                                  | United States of America (the)                             |
| Willig, Andreas           | Associate Professor in Computer Science                             | University of Canterbury                                                         | New Zealand                                                |
| Willis, Trevor            | Research Director                                                   | Stazione Zoologica Anton Dohrn                                                   | Italy                                                      |
| Willison, Martin          | Professor (retired), Biology and Environmental Studies              | Dalhousie University                                                             | Canada                                                     |
| Willmott, Keith           | Curator of Lepidoptera                                              | University of Florida                                                            | United States of America (the)                             |
| Willms, Allan             | Professor, Department of Mathematics & Statistics                   | University of Guelph                                                             | Canada                                                     |
| Wills, Peter              | Theoretical Biologist, Department of Physics                        | University of Auckland                                                           | New Zealand                                                |
| Willson, Susan            | Assoc. Professor of Biology                                         | St. Lawrence University                                                          | United States of America (the)                             |
| Wilmé, Lucienne           | Project Coordinator in Madagascar                                   | World Resources Institute                                                        | Madagascar                                                 |
| Wilmotte, Annick          | PI microbiology                                                     | University of Liège                                                              | Belgium                                                    |
| Wilsey, Chad              | VP of Conservation Science                                          | National Audubon Society                                                         | United States of America (the)                             |
| Wilshire, Howard          | Senior scientist geologist                                          | U.S. Geological Survey                                                           | United States of America (the)                             |
| Wilson, Barry             | Systems Ecologist and Professional Forester                         | CE Analytic Ltd.                                                                 | Canada                                                     |
| Wilson, Martin            | PhD Environmental particulate toxicology                            | Freelance writer/editor                                                          | United Kingdom of Great Britain and Northern Ireland (the) |
| Wilson, Mark              | Associate Professor of Botany (ecology)                             | Oregon State University                                                          | United States of America (the)                             |
| Wilson, Mallory           |                                                                     | University of Queensland                                                         | Australia                                                  |
| Wilson, Vanessa           | Postdoctoral Researcher, Primatology                                | German Primate Center                                                            | Germany                                                    |
| Wilson, Nerida            | Manager, Molecular Systematics Unit                                 | Western Australian Museum                                                        | Australia                                                  |
| Wilson, Kerry-Jayne       | Senior lecturer in Ecology (retired)                                | Lincoln University                                                               | New Zealand                                                |
| Wilson, Sarah Jane        | Researcher, Tropical forest ecology and livelihoods                 | University of Victoria                                                           | Canada                                                     |
| Wilson, Robert            | Research Scientist in Global Change Biology                         | Museo Nacional de Ciencias Naturales (Madrid, Spain)                             | Spain                                                      |
| Wilson, Scott             | Senior Lecturer                                                     | Macquarie University                                                             | Australia                                                  |
| Wilson, Susan             | Associate professor                                                 | University of new england                                                        | Australia                                                  |
| WILSON, DAVID             | Researcher / biogeochemical cycling in organic soils                | Earthy Matters Environmental Consultants                                         | Ireland                                                    |
| Wilson-Kruchen, Elizabeth | PhD in Chemistry, working as Bioanalytical Expert in Pharma Company | Biotest AG                                                                       | Germany                                                    |
| Wiltshire, David          | Professor of Theoretical Physics                                    | University of Canterbury                                                         | New Zealand                                                |
| Winchester, Neville       | Adjunct Assistant Professor Biology                                 | University of Victoria                                                           | Canada                                                     |
| Winck, Gisele             | Post-doc Fellow                                                     | Laboratoire d'Ecologie Alpine, UMR CNRS-UGA-USMB 5553, Université Grenoble Alpes | France                                                     |
| Winckel, Joy              | Senior Fish and Wildlife Biologist (retired)                        | US Fish and Wildlife Service                                                     | United States of America (the)                             |
| Winfrey, Claire           | PhD student in ecology & evolutionary biology                       | University of Tennessee, Knoxville                                               | United States of America (the)                             |
| Wingert, Juliana          | Postdoc                                                             | UFRGS                                                                            | Brazil                                                     |
| Winkler, Jörg             | Bioinformatics                                                      | Freie Universität Berlin                                                         | Germany                                                    |
| Winkler, Daniel           | Ecologist                                                           | University of California, Irvine                                                 | United States of America (the)                             |
| Winn, Brad                | Conservation Biologist                                              |                                                                                  | United States of America (the)                             |
| Winter, Carolin           |                                                                     | UFZ                                                                              | Germany                                                    |

|                                |                                         |                                                                                                        |                                                            |
|--------------------------------|-----------------------------------------|--------------------------------------------------------------------------------------------------------|------------------------------------------------------------|
| Winter, Marten                 | Scientific Head                         | sDiv - Synthesis Centre, German Centre for Integrative Biodiversity Research (iDiv) Halle-Jena-Leipzig | Germany                                                    |
| Winter, Carlos                 | Associate Professor/Parasitology        | Universidade de Sao Paulo                                                                              | Brazil                                                     |
| Winter, Maiken                 | Ecology                                 | WissenLeben e.V.                                                                                       | Germany                                                    |
| Winterhalter, Charles          | Research Associate, Genetics            | Centre for Bacterial Cell Biology                                                                      | United Kingdom of Great Britain and Northern Ireland (the) |
| Winters, Sandra                | Research Associate, Biological Sciences | University of Bristol                                                                                  | United Kingdom of Great Britain and Northern Ireland (the) |
| Wiper, Susan                   | PhD student                             | University of Chester                                                                                  | United Kingdom of Great Britain and Northern Ireland (the) |
| Wipf, Heidi                    | PhD Candidate                           | University of California, Berkeley                                                                     | United States of America (the)                             |
| Wipf, Sonja                    | Senior Researcher                       |                                                                                                        | Switzerland                                                |
| Wirth, Rainer                  | Scientist & Lecturer/ Plant Ecology     | University of Kaiserslautern                                                                           | Germany                                                    |
| Wirtz, Marcus                  | PhD Student - Astroparticle Physics     | III. Physikalisches Institut - RWTH Aachen University                                                  | Germany                                                    |
| Wiscombe, Warren               | emeritus climate scientist              | NASA Goddard Space Flight Center                                                                       | United States of America (the)                             |
| Wiseman, Clare                 | Associate Professor                     | School of the Environment, University of Toronto                                                       | Canada                                                     |
| Wishingrad, Van                | PhD candidate                           | University of Hawaii at Manoa                                                                          | United States of America (the)                             |
| Wislocka, Agata                | Astronomy and Astrophysics              | University of Innsbruck                                                                                | Austria                                                    |
| Wislocka, Agata                | Astrophysics                            |                                                                                                        | Ireland                                                    |
| Wissing, Jan Maik              | Physicist                               | Institute of Environmental Systems Research, University of Osnabrück                                   | Germany                                                    |
| Witt, Arne                     | Invasion biologist                      |                                                                                                        | South Africa                                               |
| Witt, Hannes                   | PostDoc, Biophysics                     | Max-Planck-Institute of Dynamics and Self-Organization                                                 | Germany                                                    |
| Witter, Marti                  | Fire Ecologist                          | National Park Service                                                                                  | United States of America (the)                             |
| Wloch-Salamon, Dominika        | Assistant Professor                     | Jagiellonian University, Institute of Environmental Sciences                                           | Poland                                                     |
| Wöbbecke, Kerstin              | biologist                               |                                                                                                        | Germany                                                    |
| Wójcik, Adrian                 | Vice Dean, Psychology                   | Faculty of Humanities, Nicolaus Copernicus University                                                  | Poland                                                     |
| Wojczulanis-Jakubas, Katarzyna | Associate Professor                     | University of Gdańsk                                                                                   | Poland                                                     |
| Wolf, Kurt Bernardo            | Professor, physics                      | Universidad Nacional Autónoma de México                                                                | Mexico                                                     |
| wolfe, martha                  | professor emeritus of biology           | elizabethtown community and technical college                                                          | United States of America (the)                             |
| Wolfe, Joe                     | Professor of Physics                    | UNSW Sydney                                                                                            | Australia                                                  |
| Wolff, Irenaeus                | Economist                               |                                                                                                        | Switzerland                                                |
| Wolff, Nathan                  | Geology                                 | UACH                                                                                                   | Chile                                                      |
| Wolff, Jörg-Olaf               | Professor of Physical Oceanography      | University of Oldenburg                                                                                | Germany                                                    |
| Wölfling, Mirko                | Dipl.-Biol. aktuell Doktorand           | Universität Wien                                                                                       | Austria                                                    |
| Wolfram, Jakob                 | Environmental Scientist                 | University of Koblenz-Landau                                                                           | Germany                                                    |
| Wolfson, Adi                   | Prof. Green Processes Center            | Sani Shamoan College of Engineering                                                                    | Israel                                                     |
| Wolkis, Dustin                 | Seed Bank and Laboratory Manager        | National Tropical Botanical Garden                                                                     | United States of America (the)                             |

|                          |                                                   |                                                              |                                                            |
|--------------------------|---------------------------------------------------|--------------------------------------------------------------|------------------------------------------------------------|
| Wollenberg, Eva Lini     | Research Professor and CCAFS Flagship Leader      | University of Vermont and CGIAR-CCAFS                        | United States of America (the)                             |
| Wolny, Adrian            | PhD student                                       | Heidelberg University                                        | Poland                                                     |
| Wolters, Jan-Willem      | PhD Student in aquatic ecology                    | University of Antwerp                                        | Belgium                                                    |
| Wong, Bob                | Professor of Behavioural and Evolutionary Ecology | School of Biological Sciences, Monash University             | Australia                                                  |
| Wong, Lindsey S.         | Medical Biophysics                                |                                                              | Canada                                                     |
| Wong, Laurence           | Professor of Biochemistry                         | Burman University                                            | Canada                                                     |
| Wong-Kone, Diane         | Wildlife Biologist                                | Otis Bay Ecological Consultants/Great Basin Bird Observatory | United States of America (the)                             |
| Wongbusarakum, Supin     | Social scientist                                  |                                                              | United States of America (the)                             |
| wongsanguan, nigel       | veterinarian                                      | Western Australia Veterinary Emergency and Specialist        | Australia                                                  |
| Wonham, Walter           | Professor Emeritus, ECE                           | University of Toronto                                        | Canada                                                     |
| Wood, Anna               | Teaching Fellow/Ecology                           | University of Otago                                          | New Zealand                                                |
| Wood, Jamie              | Palaeoecologist                                   | Manaaki Whenua Landcare Research                             | New Zealand                                                |
| Wood, Marianna           | Associate Professor- Ecology                      | Bloomsburg University                                        | United States of America (the)                             |
| Wood, Alaina             | Sustainability Scientist                          | First Tennessee Development District                         | United States of America (the)                             |
| Wood, Graham             | Statistics                                        | University of Otago                                          | New Zealand                                                |
| Wood, Kathleen McNary    | Principal                                         | SWA Environmental                                            | Turks and Caicos Islands (the)                             |
| Wood, Eleanor            | PhD student                                       | SAMS                                                         | United Kingdom of Great Britain and Northern Ireland (the) |
| Woodcock, Ben            | Ecologist                                         | Centre for Ecology & Hydrology                               | United Kingdom of Great Britain and Northern Ireland (the) |
| Woods, Carrie            | Assistant Professor of Biology                    | University of Puget Sound                                    | United States of America (the)                             |
| Woods, Briannyn          | Marine Biology - researcher                       | Institute for Marine and Antarctic Studies                   | Australia                                                  |
| Woodsworth, Glenn        | Research Scientist Emeritus                       | Geological Survey of Canada                                  | Canada                                                     |
| Woodward, Elsa           | Retired biochemist                                |                                                              | United Kingdom of Great Britain and Northern Ireland (the) |
| Woodwell, George M.      | President and Director Emeritus                   | The Woods Hole Research Center                               | United States of America (the)                             |
| Wooldridge, Rebecca      | Wildlife Biologist                                | Panthera                                                     | Belize                                                     |
| Wooldridge, John         | Soil science / plant nutrition                    | Agricultural Research Council (retired)                      | South Africa                                               |
| Woolf, Dominic           | Senior Research Associate                         | Cornell University                                           | United States of America (the)                             |
| Woolfall, Marc           | Chartered Chemist                                 |                                                              | United Kingdom of Great Britain and Northern Ireland (the) |
| Worden, M.D., Wm. Lamont | Emergency Medicine                                |                                                              | United States of America (the)                             |
| Wörheide, Prof. Dr. Gert | Professor (Chair) of geobiology & Paleontology    | Ludwig-Maximilians-Universität München (LMU)                 | Germany                                                    |
| Wormell, dominic         | Head of mammals                                   | Durrell                                                      | United Kingdom of Great Britain and Northern Ireland (the) |
| Worsham, McLean          | PhD student of evolutionary biology               | University of Hawaii                                         | United States of America (the)                             |
| Wosika-Witz, Victoria    | PhD student in Life Sciences                      | University of Lausanne                                       | Switzerland                                                |
| Wotton, Karl             | Senior Lecturer in Migration Biology              | University of Exeter                                         | United Kingdom of Great Britain and Northern Ireland (the) |
| Wouters, Stefan          | Cellular biologist                                | Utrecht University                                           | Netherlands (the)                                          |

|                              |                                                                         |                                                                 |                                                            |
|------------------------------|-------------------------------------------------------------------------|-----------------------------------------------------------------|------------------------------------------------------------|
| Woutersen, Amber             | Palaeoecology                                                           | University of Amsterdam                                         | Netherlands (the)                                          |
| Woyciechowski, Michal        | Professor - biology                                                     | Jagiellonian University                                         | Poland                                                     |
| Wrage-Moennig, Nicole        | Professor of Grassland and Fodder Sciences                              | University of Rostock                                           | Germany                                                    |
| Wraith, Jenna                | PhD Candidate/ Conservation biology and climate change                  | Griffith University                                             | Australia                                                  |
| Wrbka, Thomas                | Ass.Prof. / Landscape Ecology                                           | Univ.Vienna                                                     | Austria                                                    |
| Wright, Jeff                 | Software Engineer                                                       |                                                                 | United States of America (the)                             |
| Wright, Ian                  | Professor                                                               | Macquarie University                                            | Australia                                                  |
| Wright, Philip               | Retired Chartered Fellow                                                | Chartered Institute of Water and Environmental Management       | United Kingdom of Great Britain and Northern Ireland (the) |
| Wright, Wendy                | Associate Professor, Biology                                            | Federation University Australia                                 | Australia                                                  |
| Wright, Tarah                | Professor                                                               | Dalhousie University                                            | Canada                                                     |
| Wright, Rebecca              | Senior Research Associate/Environmental sciences                        | University of East Anglia                                       | United Kingdom of Great Britain and Northern Ireland (the) |
| Wright, Edward               | Biologist                                                               | Max Planck Institute for Evolutionary Anthropologist            | Germany                                                    |
| Wright, Jeremy               | Emeritus Professor of Engineering Mathematics                           | University of Bristol                                           | United Kingdom of Great Britain and Northern Ireland (the) |
| Wright, Patricia             | Professor                                                               | University of Guelph                                            | Canada                                                     |
| Wright, Bruce                | Senior Scientist, ecologist                                             | University of Alaska, retired                                   | United States of America (the)                             |
| Wright, Sarah                | Water-Energy-Food Nexus                                                 | Wageningen University and Research                              | Netherlands (the)                                          |
| Wrobel, Iwona                | Material Science Engineer                                               | University of Connecticut                                       | United States of America (the)                             |
| Wubs, Jasper                 | Postdoctoral Fellow, Ecology and Agriculture                            | ETH Zurich                                                      | Switzerland                                                |
| Wuebbles, Donald             | Professor                                                               | University of Illinois                                          | United States of America (the)                             |
| Wueringer, Barbara Elisabeth | Director & Principal Scientist                                          | Sharks And Rays Australia                                       | Australia                                                  |
| Wulff, Angela                | Professor in marine ecology                                             | University of Gothenburg                                        | Sweden                                                     |
| Wund, Matthew                | Professor of Biology                                                    | The College of New Jersey                                       | United States of America (the)                             |
| Wunderlich, Rainer Ferdinand | PhD Student                                                             | National Taiwan University                                      | Taiwan                                                     |
| Wunsch, Carl                 | Professor of Physical Oceanography and Climate                          | Harvard University                                              | United States of America (the)                             |
| Wuyts, Jurgen                | PhD student                                                             | KU Leuven                                                       | Belgium                                                    |
| Wward, Selina                | Senior Lecturer                                                         | The University of Queensland                                    | Australia                                                  |
| Wyatt, Tristram              | Senior Research Fellow, Animal Behaviour (Zoology)                      | University of Oxford                                            | United Kingdom of Great Britain and Northern Ireland (the) |
| Wydra, Kerstin               | Prof. Plant production and climate change                               | Erfurt University of Applied Sciences                           | Germany                                                    |
| WYLER, Nicolas               | Curator                                                                 | Conservatoire et Jardin botaniques                              | Switzerland                                                |
| Wynberg, Rachel              | Environmental scientist                                                 | University of Cape Town                                         | South Africa                                               |
| Wynne, Darragh               | M Sc in Climate Change Media Policy and Society, Dublin City University | none                                                            | Ireland                                                    |
| Wysocka, Alicja              | PhD candidate                                                           | International Institute of Molecular and Cell Biology in Warsaw | Poland                                                     |
| Wyss, Carlos                 | Projekt Leader Platform Hydropower Mitigation                           | Wasser-Agenda 21                                                | Switzerland                                                |
| Wyvill, Geoff                | Emeritus Professor, Computer Science                                    | University of Otago                                             | New Zealand                                                |
| Xavier, Miguel               | Research Fellow                                                         | International Iberian Nanotechnology Laboratory                 | Portugal                                                   |

|                          |                                                         |                                                                                              |                                                            |
|--------------------------|---------------------------------------------------------|----------------------------------------------------------------------------------------------|------------------------------------------------------------|
| Xavier, Joana            | Principal Researcher                                    | CIIMAR - Interdisciplinary Centre of Marine and Environmental Research, University of Porto  | Portugal                                                   |
| Xiang, Xianling          | Professor                                               | Anhui Normal University; The Netherlands Institute of Ecology                                | China                                                      |
| Xie, Zunyi               | Postdoc                                                 | The University of Queensland                                                                 | Australia                                                  |
| Xu, Feifei               | Researcher                                              | Uppsala University                                                                           | Sweden                                                     |
| Xuereb, André            | Professor of physics                                    | University of Malta                                                                          | Malta                                                      |
| Yabi, Ibouiraïma         | Geographer ; Lecturer-Research                          | Univ. of Abomey-Calavi                                                                       | Benin                                                      |
| Yager, Karina            | Assistant Professor, Sustainability Studies             | Stonybrook University, New York                                                              | United States of America (the)                             |
| YALCIN, Refet Ali        | Post-doc / Mechanical Engineering                       | PPRime                                                                                       | France                                                     |
| Yamamoto, Maria Emilia   | Emeritus Professor                                      | Universidade Federal do Rio Grande do Norte                                                  | Brazil                                                     |
| Yamamoto, Flavia         | Postdoc                                                 | Unesp                                                                                        | Brazil                                                     |
| YAMAMOTO, Ryoichi        | Professor Emeritus                                      | The University of Tokyo                                                                      | Japan                                                      |
| Yamaoka, Naomi           | Graduate Student                                        | UBCO                                                                                         | Canada                                                     |
| Yan, Norman              | Senior Research Scholar                                 | York University                                                                              | Canada                                                     |
| YAN, Li                  |                                                         | Guangxi University                                                                           | China                                                      |
| Yanai, Zohar             | Post-doctoral fellow                                    | UNIL                                                                                         | Switzerland                                                |
| Yáñez-Serrano, ana maria | postdoctoral fellow                                     | CREAF                                                                                        | Spain                                                      |
| Yang, Mary               | Climate Action Commission                               | City of Solana Beach                                                                         | United States of America (the)                             |
| Yang Amri, Affendi       | Research Officer (Coral Reef Ecology)                   | Institute of Ocean and Earth Sciences (IOES), University of Malaya                           | Malaysia                                                   |
| Yannelli, Florencia      | Postdoc                                                 | Centre for Invasion Biology                                                                  | South Africa                                               |
| Yannic, Glenn            | Professor, Biology                                      | Université Savoie Mont Blanc                                                                 | France                                                     |
| Yanos, Casey             | PhD in Marine Science                                   | University of Groningen                                                                      | Netherlands (the)                                          |
| Yanuar, Achmad           | Researcher and lecture                                  | Tropical Biodiversity Conservation Center, Biology Department, Universitas Nasional, Jakarta | Indonesia                                                  |
| Yap, Jo Leen             | PhD candidate, Wildlife Researcher & Nature Educator    | Universiti Sains Malaysia & Langur Project Penang                                            | Malaysia                                                   |
| Yarish, Charles          | Professor                                               | University of Connecticut                                                                    | United States of America (the)                             |
| Yasuhara, Moriaki        | Associate professor/Paleobiology                        | The University of Hong Kong                                                                  | Hong Kong                                                  |
| YAZDANI, Farhan          | Surgery                                                 | HÔPITAL de PLOERMEL                                                                          | France                                                     |
| YAZLIK, Ayse             | Dr. / Weed science                                      | Düzce University Faculty of Agriculture and Natural Sciences Plant Protection Department     | Turkey                                                     |
| Yee, Mon Oo              | Phd candidate                                           | University of Southern Denmark                                                               | Denmark                                                    |
| Yeigh, Tony              | Senior Researcher                                       | Southern Cross University                                                                    | Australia                                                  |
| Yela, José Luis          | Associate Professor of Zoology and Conservation Biology | University of Castilla-La Mancha                                                             | Spain                                                      |
| Yemm, Adrian             | Post-Doctoral Research Associate - Biomedical Research  | Newcastle University                                                                         | United Kingdom of Great Britain and Northern Ireland (the) |
| Yeppez, Enrico A.        | Research Professor                                      | Instituto Tecnológico de Sonora                                                              | Mexico                                                     |
| Yerger, Ellen            | Assistant Professor of Biology                          | Indiana University of Pennsylvania, Indiana PA, USA                                          | United States of America (the)                             |
| Yeşilyurt, Burcu         | Instructor                                              | TED university                                                                               | Turkey                                                     |

|                       |                                                                    |                                                                                                |                                                            |
|-----------------------|--------------------------------------------------------------------|------------------------------------------------------------------------------------------------|------------------------------------------------------------|
| Yeste, Antonio        | Researcher, Ecology                                                | Universidad Pública de Navarra                                                                 | Spain                                                      |
| Yetman, Caroline      | Zoologist                                                          | Self-employed                                                                                  | South Africa                                               |
| Yeung, Alex Chee Yu   | PhD graduate                                                       | University of British Columbia                                                                 | Canada                                                     |
| Yoccoz, Nigel         | Professor Ecology                                                  | UiT The Arctic University of Norway                                                            | Norway                                                     |
| Yokochi, Kaori        | Teaching Scholar in Conservation Biology                           | Deakin University                                                                              | Australia                                                  |
| Yonga, Paul           | Medicine/Infectious & Tropical Diseases                            | Fountain Health Care Hospital                                                                  | Kenya                                                      |
| Yoon, Hyun Seok       | Graduate Student/ conservation biology                             | University of Tennessee, Knoxville                                                             | United States of America (the)                             |
| Yordanova, Kristina   | Computer Science                                                   | University of Rostock                                                                          | Germany                                                    |
| Yoshida, Yuki         | Assistant Professor, Sustainability Science                        | Hiroshima University                                                                           | Japan                                                      |
| Youbi, Nasrddine      | Professor/Geosciences                                              | Department of Geology, Faculty of Sciences-Semlalia, Cadi Ayyad University, Marrakesh, Morocco | Morocco                                                    |
| Youlatos, Dionisios   | Professor of Zoology                                               | Aristotle University of Thessaloniki                                                           | Greece                                                     |
| Young, Mirjam         | PhD Student in Behavioural Ecology                                 | Leipzig University                                                                             | Germany                                                    |
| Young, Einir          | Director of Sustainability                                         | Bangor University                                                                              | United Kingdom of Great Britain and Northern Ireland (the) |
| Young, Joanna         | PhD Candidate Geophysics/Glaciology                                | University of Alaska Fairbanks                                                                 | United States of America (the)                             |
| Young, Fiona          | Natural Scientist                                                  | BioScience Holistics                                                                           | United Kingdom of Great Britain and Northern Ireland (the) |
| Young, Rebecca        | ecological physiologist                                            |                                                                                                | United States of America (the)                             |
| Young, Aythya         | PhD Student                                                        | The University of Edinburgh                                                                    | United Kingdom of Great Britain and Northern Ireland (the) |
| Young, Kenneth        | Professor, Geography and the Environment                           | University of Texas at Austin                                                                  | United States of America (the)                             |
| Young, Catherine      | Ecology                                                            | University of Tasmania                                                                         | Australia                                                  |
| Young, Kyle           | Ecologist                                                          | University of Zurich                                                                           | United States of America (the)                             |
| Young, Paul           | Senior Lecturer in Biochemistry                                    | University College Cork                                                                        | Ireland                                                    |
| Yount, John D         | Ecology                                                            | Environmental Protection Agency                                                                | United States of America (the)                             |
| Youtz, Joseph         | Masters Candidate in Biology                                       | Arkansas State University                                                                      | United States of America (the)                             |
| Yovovich, Veronica    | Postdoc Researcher                                                 | University of California, Berkeley                                                             | United States of America (the)                             |
| Ypma, Stefanie        | PhD Student in Physical Oceanography                               | Delft University of Technology                                                                 | Netherlands (the)                                          |
| Yu, LILI              | Postdoctoral researcher                                            | Macquarie University                                                                           | Australia                                                  |
| Yu, Man               | Environmental Engineering                                          | UNSW Sydney                                                                                    | Australia                                                  |
| Yuille, Martin        | Honorary Reader                                                    | The University of manchester                                                                   | United Kingdom of Great Britain and Northern Ireland (the) |
| Yule, Kelsey          | Ecology and Evolutionary Biology                                   | Arizona State University                                                                       | United States of America (the)                             |
| Yule, Catherine       | Professor of Ecology and Head of School of Science and Engineering | University of the Sunshine Coast                                                               | Australia                                                  |
| Yulizar, Yulizar      | Lecturer                                                           | Universitas Pertamina                                                                          | Indonesia                                                  |
| Yun, Joao             | Associate professor of Astrophysics                                | University of Lisbon                                                                           | Portugal                                                   |
| Yusefi, Gholam Hosein | PhD- Biodiversity, Genetics & Evolution                            | Cibio/InBio                                                                                    | Portugal                                                   |
| Yusuf, Abdullahi      | Researcher in Chemical Ecology                                     | University of Pretoria                                                                         | South Africa                                               |
| Yves, Desdevises      | Professor in Marine Biology                                        | Sorbonne Université                                                                            | France                                                     |
| Zachmann, Gabriel     | Professor of Computer Science                                      | University of Bremen                                                                           | Germany                                                    |

|                            |                                               |                                                                                            |                                |
|----------------------------|-----------------------------------------------|--------------------------------------------------------------------------------------------|--------------------------------|
| Zaelke, Durwood            | Adjunct Professor                             | Bren School of Environmental Science & Management, University of California, Santa Barbara | United States of America (the) |
| Zafrilla, Jorge            | Assistant Professor                           | University of Castilla-La Mancha                                                           | Spain                          |
| Zaganescu, Calin           | Air Quality Modelling Scientist               | Environment and Climate Change Canada (ECCC)                                               | Canada                         |
| Zagar, Anamarija           | Herpetologist                                 |                                                                                            | Slovenia                       |
| Zagmajster, Maja           | Subterranean Biology                          | University of Ljubljana                                                                    | Slovenia                       |
| Zagrean, Leon              | Physiology and Neuroscience                   | "Carol Davila" University of Medicine and Pharmacy                                         | Romania                        |
| Zaguri, Moshe              | Ecologist                                     | The Hebrew University of Jerusalem                                                         | Israel                         |
| Zahavi-Ely, Avishag        | Plant physiologist (retired)                  | ARO The Volcani Center Beit Dagan                                                          | Israel                         |
| Zahmel, Jennifer           | Reproduction Biology                          | Leibniz-Institut für Zoo- und Wildtierforschung                                            | Germany                        |
| Zajicek, Petr              | Post-Doc                                      | Senckenberg Research Institute and Natural History Museum                                  | Germany                        |
| Zajitschek, Susanne        |                                               | UNSW                                                                                       | Australia                      |
| Zajonz, Uwe                | Researcher / Biology                          | Senckenberg Biodiversity and Climate Research Centre                                       | Germany                        |
| Zak, Marcelo R.            | Professor, Biologist                          | Department of Geography, National University of Cordoba and IMBIV (UNC-CONICET)            | Argentina                      |
| Zakharova, Liubov          | PhD Student in Ecological Modelling           | University of Göttingen                                                                    | Germany                        |
| Zala, Diana                | researcher                                    | Inserm                                                                                     | France                         |
| Zalba, Sergio              | Professor                                     | Universidad nacional del Sur                                                               | Argentina                      |
| zamani, neviaty            | lecture/marine science and coastal management | IPB university (Bogor Agriculture University)                                              | Indonesia                      |
| Zamanillo, Marina          | Marine biology                                |                                                                                            | Spain                          |
| Zamboni, Nadia             | Biologist and PhD student in Ecology          | Federal University of Rio Grande do Norte                                                  | Brazil                         |
| Zambryski, Patricia        | Professor of Plant and Microbial Biology      | University of California Berkeley                                                          | United States of America (the) |
| Zamora Meléndez, Alejandro | Professor of Plant Physiology                 | Universidad Nacional de Costa Rica                                                         | Costa Rica                     |
| ZAMORA-MUÑOZ, CARMEN       | Senior Lecturer                               | University of Granada                                                                      | Spain                          |
| Zamorano-Elgueta, Carlos   | Assistant professor                           | Universidad de Aysén                                                                       | Chile                          |
| Zampaulo, Robson           | Biologo                                       | Vale                                                                                       | Brazil                         |
| Zampieri, Dario            | Associate professor                           | Department of Geosciences, University of Padova                                            | Italy                          |
| Zancolli, Giulia           | Postdoc in evolutionary biology               | Université de Lausanne                                                                     | Switzerland                    |
| Zandonà, Eugenia           | Assistant Professor                           | UNIVERSIDADE DO ESTADO DO RIO DE JANEIRO                                                   | Brazil                         |
| Zandonadi, Daniel          | Professor of Plant Physiology                 | Universidade Federal do Rio de Janeiro                                                     | Brazil                         |
| Zañudo, Melissa            | Master's student in marine biology            | ICMyL-UNAM                                                                                 | Mexico                         |
| Zapata, Agustin G          | Professor of Cell Biology                     | cOMPLUTENSE uNIVERSITY                                                                     | Spain                          |
| Zapata, Fernando           | Professor, Marine Ecology                     | Universidad del Valle                                                                      | Colombia                       |
| Zapata, Felipe             | scientific software developer                 | Netherlands eScience Center                                                                | Netherlands (the)              |
| Zappa, Massimiliano        | Hydrology Researcher                          | Swiss Federal Research Institute WSL                                                       | Switzerland                    |
| Zarka, Philippe            | Dr. in Astrophysics                           | CNRS - Observatoire de Paris                                                               | France                         |
| Zarnetske, Phoebe          | Assistant Professor, Climate Change Ecology   | Michigan State University                                                                  | United States of America (the) |
| Zaú, André Scarambone      | Associate Professor, Ecology and Conservation | Federal University of the State of Rio de Janeiro                                          | Brazil                         |
| Zavala, Maria Elena        | Professor of Biology                          | CSU Northridge                                                                             | United States of America (the) |

|                                  |                                                               |                                                                                    |                                                            |
|----------------------------------|---------------------------------------------------------------|------------------------------------------------------------------------------------|------------------------------------------------------------|
| Zavorka, Libor                   | researcher in animal ecology                                  | University of Glasgow                                                              | United Kingdom of Great Britain and Northern Ireland (the) |
| Zavrel, Tomas                    | Scientist                                                     | Global Change Research Institute CAS                                               | Czech Republic (the)                                       |
| Zawadzki, Mikołaj                | Geophysics                                                    | University of Warsaw                                                               | Poland                                                     |
| Zboralski, Antoine               | PhD Candidate in Plant Microbiology                           | Université de Moncton                                                              | Canada                                                     |
| Zech, Ben                        | Environmental diplomat (rtd)/consultant                       | Independent                                                                        | Netherlands (the)                                          |
| Zech, Jana                       | Lab manager                                                   | Max Planck Institute for the science of human history                              | Germany                                                    |
| Zechmeister, Harald              | Senior Scientist                                              | University of Vienna                                                               | Austria                                                    |
| Zegre, Nicolas                   | Hydrologist                                                   | West Virginia University                                                           | United States of America (the)                             |
| Zelaya, Patricia                 | Ecology                                                       | Instituto de Ecología Regional-CONICET-UNT                                         | Argentina                                                  |
| Zelenika, Sasa                   | Full Professor with Tenure                                    | University of Rijeka, Faculty of Engineering                                       | Croatia                                                    |
| Zelený, Jakub                    | Ecologist                                                     | Czech Academy of Sciences                                                          | Czech Republic (the)                                       |
| Zelger, Isabel                   | Research Associate                                            | ETH                                                                                | Switzerland                                                |
| Zelinski, Mary                   | Research Associate Professor                                  | Oregon Health & Science University                                                 | United States of America (the)                             |
| Zeman, Herbert                   | Biomedical Engineering                                        | Univ. Of Tenn Health Science Center                                                | United States of America (the)                             |
| zeng, yijian                     | Assistant Professor                                           | ITC Faculty of Geo-information Science and Earth Observation, University of Twente | Netherlands (the)                                          |
| Zenkin, Nikolay                  | Professor of Molecular Biology                                | Newcastle University                                                               | United Kingdom of Great Britain and Northern Ireland (the) |
| Zenteno, Pablo                   | Geographer/Gaciologist                                        | INMAP                                                                              | Chile                                                      |
| Zepharovich, Elena               | PhD in Geography                                              | Centre for Development and Enviornment                                             | Switzerland                                                |
| Zeppelini, Douglas               | Prof. Dr. / Invertebrates Zoology                             | University of State Paraiba                                                        | Brazil                                                     |
| Zerefso, Christos                | Head, Research Center for Atmospheric Physics and Climatology | Academy of Athens                                                                  | Greece                                                     |
| Zethof, Jeroen                   | PhD student                                                   | TU Dresden                                                                         | Germany                                                    |
| Zhan, Qing                       | Junior Researcher                                             | NIOO-KNAW                                                                          | Netherlands (the)                                          |
| Zhang, Shuang                    | PhD                                                           |                                                                                    | Austria                                                    |
| Zhang, Siju                      | PhD student of Astrophysics                                   | Laboratoire d'Astrophysique de Marseille                                           | France                                                     |
| Zhang, Jian                      | Professor in Ecology                                          | East China Normal University                                                       | China                                                      |
| Zhang, Zhijie                    |                                                               | University of Konstanz                                                             | Germany                                                    |
| Zhao, Meng                       | Research                                                      | The GLOBE Institute /KU                                                            | Denmark                                                    |
| Zhao, Lily                       | Astronomy Graduate Student                                    | Yale University                                                                    | United States of America (the)                             |
| Zhu, Judy                        | PhD candidate, Cognitive Neuroscience                         | Macquarie University                                                               | Australia                                                  |
| Ziadé, Francois                  | Researcher                                                    | LNE                                                                                | France                                                     |
| Ziegler, Kathrin                 | Sustainable Resouce Management                                |                                                                                    | Germany                                                    |
| Ziegler, Camille                 | PhD student                                                   | Université de Lorraine - UMR Silva - UMR Ecofog                                    | Finland                                                    |
| Zielcke, Johannes                | Atmospheric science                                           | Heidelberg University                                                              | Germany                                                    |
| Zieler, Helge                    | President                                                     | Primordial Genetics Inc.                                                           | United States of America (the)                             |
| Zieliński, Piotr                 | Post-doc in Evolutionary Biology                              | Institute of Environmental Sciences, Jagiellonian University                       | Poland                                                     |
| Ziem Nascimento, Andrey Fabricio | Researcher, Structural Biology                                | Brazilian Synchrotron Light Laboratory                                             | Brazil                                                     |
| Zierden, Mark                    | Postdoctoral Research Associate                               | University of Wisconsin-Madison                                                    | United States of America (the)                             |

|                               |                                                                             |                                                                              |                                                            |
|-------------------------------|-----------------------------------------------------------------------------|------------------------------------------------------------------------------|------------------------------------------------------------|
| Ziglio, Luciana               | Doutora em Geografia Humana                                                 | Universidade de São Paulo                                                    | Brazil                                                     |
| Zikova, Nada                  | Researcher                                                                  | Institute of Chemical Process Fundamentals                                   | Czech Republic (the)                                       |
| Zilinskas, Saulius            | MSc. Environmental Engineering "ANALYSIS AND EVALUATION OF CLIMATE CHANGE " | Lithuanian Hydrometeorological Service, ASU, VDU                             | Lithuania                                                  |
| Ziller, Silvia                | Forest Engineer, PhD Biological Invasions                                   | The Horus Institute for Environmental Conservation and Development           | Brazil                                                     |
| Zim, Nomakula                 | MSc Microbiology candidate                                                  | University of Pretoria                                                       | South Africa                                               |
| Zimmerman, Amy                | Research Scientist                                                          | University of Chicago                                                        | United States of America (the)                             |
| Zimmerman, Rachel             | Marine biologist                                                            | Miss                                                                         | United States of America (the)                             |
| Zimmermann Teixeira, Fernanda | Postdoctoral researcher fellow                                              | Universidade Federal do Rio Grande do Sul                                    | Brazil                                                     |
| Zimny, Marcelina              |                                                                             | University of Gdansk, Faculty of Biology                                     | Poland                                                     |
| Zimova, Marketa               | Post-doctoral fellow                                                        | University of Michigan                                                       | United States of America (the)                             |
| Zinger, Lucie                 | Assistant Professsor                                                        | IBENS - ENS                                                                  | France                                                     |
| Zinke, Jens                   | Professor in Palaeobiology                                                  | University of Leicester                                                      | United Kingdom of Great Britain and Northern Ireland (the) |
| Zinszner, Helene              | Lecturer                                                                    | Stevens Institute                                                            | United States of America (the)                             |
| Zipf, Lars                    | PhD student Glaciology                                                      | Université libre de Bruxelles                                                | Belgium                                                    |
| Zipper, Carl E.               | Plant and Environmental Sciences (retired)                                  | Virginia Tech                                                                | United States of America (the)                             |
| Zipplies, Johannes            | PhD-Candidate, Thermal Engineering                                          | University of Kassel, Institute for Thermal Engineering                      | Germany                                                    |
| Zirngibl, Manuela             | Dipl. Math., M.Sc.                                                          | OTH Regensburg                                                               | Germany                                                    |
| Zitani, Nina                  | Curator, Zoological Collections                                             | Western University                                                           | Canada                                                     |
| Zivanovic, Goran              | Senior research associate/Population genetics                               | Institute for Biological Research "Sinisa Stankovic", University of Belgrade | Serbia                                                     |
| Zizka, Alexander              | PostDoc, Biogeography                                                       | German Center for INtegrative Biodiversity Research                          | Germany                                                    |
| Zlamal, Tomas                 | PhD student                                                                 | Global Change Research Institute CAS                                         | Czech Republic (the)                                       |
| Zlatkov, Boyan                | Assistant professor, entomology                                             | Bulgarian Academy of Sciences                                                | Bulgaria                                                   |
| Zobel, Martin                 | professor of plant ecology                                                  | University of Tartu                                                          | Estonia                                                    |
| Zocatelli, Renata             | Researcher assistant                                                        | CNRS                                                                         | France                                                     |
| Zomer, Robert                 | Visiting Professor/ Senior Landscape Ecologist                              | Kunming Institute of Botany/ Chinese Academy of Science                      | United States of America (the)                             |
| Zondervan, Edwin              | Professor of process systems engineering                                    | University of Twente                                                         | Netherlands (the)                                          |
| Zook, Douglas                 | Professor in Global Ecology and Science Education                           | UMass/Boston School for the Environment                                      | United States of America (the)                             |
| Zopf, Regine                  | Postdoctoral Fellow                                                         | Macquarie University                                                         | Australia                                                  |
| ZORRO-SANCHEZ, Carlos         | Associated Professor                                                        | Universidad de los Andes, Bogota                                             | Colombia                                                   |
| Zoubian, Julien               | research engineer                                                           | Aix Marseille Univ, CNRS/IN2P3, CPPM, Marseille, France                      | France                                                     |
| Zourou, Katerina              | Researcher                                                                  | Open University                                                              | Greece                                                     |
| Zózimo, Joana                 | Statistical Analyst - Health Sociologist                                    |                                                                              | Portugal                                                   |
| Zribi, Mehrez                 | Research director                                                           | CNRS                                                                         | France                                                     |
| zu Ermgassen, Sophus          | Ecological economics                                                        | Durrell Institute for Conservation and Ecology, University of Kent           | United Kingdom of Great Britain and Northern Ireland (the) |
| Zuanon, Jansen                | Full Researcher                                                             | Instituto nacional de Pesquisas da Amazônia                                  | Brazil                                                     |

|                        |                                                                                |                                                                                      |                                |
|------------------------|--------------------------------------------------------------------------------|--------------------------------------------------------------------------------------|--------------------------------|
| Zuberogoitia, Iñigo    | Director of wildlife department                                                | Estudios Medioambientales Icarus S.L.                                                | Spain                          |
| Zubieta, Marco         | Computer Science                                                               | Green Fab Lab Network                                                                | United States of America (the) |
| Zuccarello, Francesca  | Professor / Solar Physics                                                      | University of Catania                                                                | Italy                          |
| Zug, Rebecca           | Conservation Biology Professor/Researcher                                      | Universidad San Francisco de Quito                                                   | Ecuador                        |
| Zuidema, Pieter        | Professor of Tropical Forest Ecology                                           | Wageningen University                                                                | Netherlands (the)              |
| Zuleta, Daniel         | Postdoctoral Researcher                                                        | Smithsonian Tropical Research Institute                                              | United States of America (the) |
| Zuleta, Gustavo        | Director                                                                       | Dept. Ecology & Environmental Sc., Maimonides University                             | Argentina                      |
| zuñiga, agustin        | Dr Physics                                                                     | Nuclear Energy Peruvian Institute                                                    | Peru                           |
| Żurek, Roman           | professor                                                                      | Institute of NAture Conservation, Polish Academy of Sciences                         | Poland                         |
| Zurell, Andreas        | WM                                                                             | University of Potsdam                                                                | Germany                        |
| Zurita-Milla, Raul     | Prof. Spatio-temporal analytics                                                | Faculty of Geo-information Science and Earth Observation (ITC), University of Twente | Netherlands (the)              |
| Zurlo, Francesco       | Docente scienze giuridiche ed economiche                                       | Polo di Cutro                                                                        | Italy                          |
| Zürn-Müller, Hildegard | Dr. med.                                                                       | retired                                                                              | Germany                        |
| Zutinic, Petar         | Assistant professor                                                            | Faculty of Science, University of Zagreb                                             | Croatia                        |
| Zwander, Helmut        | Professor                                                                      | Pädagogische Hochschule Kärnten                                                      | Austria                        |
| Zwartsenberg, Sophie   | PhD Candidate                                                                  | Wageningen University                                                                | Netherlands (the)              |
| Zwickle, Adam          | Professor of Risk Communication and Decision Science                           | Michigan State University                                                            | United States of America (the) |
| Zych, Marcin           | Director / Evolutionary biologist                                              | University of Warsaw Botanic Garden                                                  | Poland                         |
| Życki, Artur           | Professor of Social Science                                                    | Jan Kochanowski University in Kielce                                                 | Poland                         |
| טָהר, Tali             | Sahar                                                                          | Hebrew University of Jerusalem                                                       | Israel                         |
| (nee Olm) Eachus, Myra | Ph.D Research Scientist in Physical Chemistry and Solid State Physics, retired | Eastman Kodak Research Laboratories, Rochester, NY                                   | United States of America (the) |
